# Supplementary material for: A tensor decomposition-based integrated analysis applicable to multiple gene expression profiles without sample matching
Source: Research Square preprint supplement (doi:10.21203/rs.3.rs-766884/v1), 2021-08-02
Supplement: Supplementary file 1 [file 5485d8d06ccd0c3b5c42649c.xlsx]

## Sheet: ensembl gene
1	ENSG00000002834
2	ENSG00000006125
3	ENSG00000007168
4	ENSG00000008294
5	ENSG00000008988
6	ENSG00000009307
7	ENSG00000010404
8	ENSG00000011422
9	ENSG00000011600
10	ENSG00000015479
11	ENSG00000018189
12	ENSG00000019505
13	ENSG00000026025
14	ENSG00000030582
15	ENSG00000034510
16	ENSG00000038382
17	ENSG00000038427
18	ENSG00000041982
19	ENSG00000044574
20	ENSG00000046653
21	ENSG00000047849
22	ENSG00000048740
23	ENSG00000052802
24	ENSG00000053438
25	ENSG00000054523
26	ENSG00000054793
27	ENSG00000063046
28	ENSG00000063177
29	ENSG00000065978
30	ENSG00000067225
31	ENSG00000067560
32	ENSG00000067715
33	ENSG00000067840
34	ENSG00000069275
35	ENSG00000070087
36	ENSG00000070756
37	ENSG00000070961
38	ENSG00000071054
39	ENSG00000071082
40	ENSG00000071575
41	ENSG00000072832
42	ENSG00000074800
43	ENSG00000075340
44	ENSG00000075415
45	ENSG00000075618
46	ENSG00000075624
47	ENSG00000077097
48	ENSG00000077279
49	ENSG00000078018
50	ENSG00000078369
51	ENSG00000079215
52	ENSG00000079246
53	ENSG00000079459
54	ENSG00000080824
55	ENSG00000081189
56	ENSG00000083845
57	ENSG00000084070
58	ENSG00000084073
59	ENSG00000084207
60	ENSG00000084234
61	ENSG00000084731
62	ENSG00000085117
63	ENSG00000086061
64	ENSG00000087086
65	ENSG00000087258
66	ENSG00000087460
67	ENSG00000088247
68	ENSG00000089009
69	ENSG00000089157
70	ENSG00000089220
71	ENSG00000089280
72	ENSG00000090104
73	ENSG00000090621
74	ENSG00000091136
75	ENSG00000092199
76	ENSG00000092841
77	ENSG00000092964
78	ENSG00000094916
79	ENSG00000095970
80	ENSG00000096384
81	ENSG00000099194
82	ENSG00000099622
83	ENSG00000099783
84	ENSG00000100097
85	ENSG00000100167
86	ENSG00000100201
87	ENSG00000100316
88	ENSG00000100320
89	ENSG00000100906
90	ENSG00000100985
91	ENSG00000101210
92	ENSG00000101608
93	ENSG00000102003
94	ENSG00000102109
95	ENSG00000102226
96	ENSG00000102265
97	ENSG00000102804
98	ENSG00000103034
99	ENSG00000104408
100	ENSG00000104419
101	ENSG00000104435
102	ENSG00000104549
103	ENSG00000104722
104	ENSG00000104904
105	ENSG00000105193
106	ENSG00000105223
107	ENSG00000105290
108	ENSG00000105323
109	ENSG00000105372
110	ENSG00000105373
111	ENSG00000105409
112	ENSG00000105426
113	ENSG00000105568
114	ENSG00000105640
115	ENSG00000105894
116	ENSG00000106153
117	ENSG00000106278
118	ENSG00000108001
119	ENSG00000108107
120	ENSG00000108175
121	ENSG00000108298
122	ENSG00000108518
123	ENSG00000108654
124	ENSG00000108828
125	ENSG00000108953
126	ENSG00000109472
127	ENSG00000109475
128	ENSG00000109654
129	ENSG00000109971
130	ENSG00000110076
131	ENSG00000110092
132	ENSG00000110321
133	ENSG00000110651
134	ENSG00000110700
135	ENSG00000110955
136	ENSG00000111348
137	ENSG00000111371
138	ENSG00000111640
139	ENSG00000111642
140	ENSG00000111669
141	ENSG00000111674
142	ENSG00000111676
143	ENSG00000111716
144	ENSG00000111897
145	ENSG00000112306
146	ENSG00000112531
147	ENSG00000112972
148	ENSG00000113140
149	ENSG00000113161
150	ENSG00000113580
151	ENSG00000113648
152	ENSG00000113657
153	ENSG00000113758
154	ENSG00000114353
155	ENSG00000114391
156	ENSG00000114554
157	ENSG00000115009
158	ENSG00000115053
159	ENSG00000115266
160	ENSG00000115268
161	ENSG00000115306
162	ENSG00000115310
163	ENSG00000115457
164	ENSG00000116133
165	ENSG00000116251
166	ENSG00000116560
167	ENSG00000116729
168	ENSG00000116741
169	ENSG00000116852
170	ENSG00000116985
171	ENSG00000117016
172	ENSG00000117450
173	ENSG00000117519
174	ENSG00000117592
175	ENSG00000117632
176	ENSG00000117984
177	ENSG00000118181
178	ENSG00000118271
179	ENSG00000118785
180	ENSG00000118816
181	ENSG00000119283
182	ENSG00000119335
183	ENSG00000120708
184	ENSG00000120885
185	ENSG00000121774
186	ENSG00000122026
187	ENSG00000122406
188	ENSG00000122566
189	ENSG00000122641
190	ENSG00000122862
191	ENSG00000123349
192	ENSG00000123384
193	ENSG00000123416
194	ENSG00000124422
195	ENSG00000124762
196	ENSG00000124766
197	ENSG00000125538
198	ENSG00000125691
199	ENSG00000126214
200	ENSG00000126709
201	ENSG00000127022
202	ENSG00000127184
203	ENSG00000127603
204	ENSG00000127616
205	ENSG00000128245
206	ENSG00000128564
207	ENSG00000128739
208	ENSG00000128872
209	ENSG00000129351
210	ENSG00000130066
211	ENSG00000130255
212	ENSG00000130287
213	ENSG00000130294
214	ENSG00000130402
215	ENSG00000130513
216	ENSG00000130522
217	ENSG00000130723
218	ENSG00000130726
219	ENSG00000130985
220	ENSG00000131236
221	ENSG00000131238
222	ENSG00000131409
223	ENSG00000131469
224	ENSG00000131473
225	ENSG00000131507
226	ENSG00000131584
227	ENSG00000131711
228	ENSG00000131747
229	ENSG00000132341
230	ENSG00000132475
231	ENSG00000132688
232	ENSG00000132718
233	ENSG00000132872
234	ENSG00000132965
235	ENSG00000133030
236	ENSG00000133048
237	ENSG00000133083
238	ENSG00000133112
239	ENSG00000133318
240	ENSG00000133639
241	ENSG00000133805
242	ENSG00000133872
243	ENSG00000134121
244	ENSG00000134308
245	ENSG00000134313
246	ENSG00000134824
247	ENSG00000134986
248	ENSG00000135390
249	ENSG00000135404
250	ENSG00000135406
251	ENSG00000135486
252	ENSG00000135535
253	ENSG00000135916
254	ENSG00000135919
255	ENSG00000136167
256	ENSG00000136193
257	ENSG00000136295
258	ENSG00000136689
259	ENSG00000136854
260	ENSG00000136942
261	ENSG00000137154
262	ENSG00000137267
263	ENSG00000137285
264	ENSG00000137309
265	ENSG00000137331
266	ENSG00000137726
267	ENSG00000137818
268	ENSG00000137942
269	ENSG00000138071
270	ENSG00000138326
271	ENSG00000138668
272	ENSG00000138758
273	ENSG00000139289
274	ENSG00000139318
275	ENSG00000139644
276	ENSG00000139970
277	ENSG00000140264
278	ENSG00000140945
279	ENSG00000140988
280	ENSG00000141367
281	ENSG00000142089
282	ENSG00000142156
283	ENSG00000142192
284	ENSG00000142534
285	ENSG00000142541
286	ENSG00000142669
287	ENSG00000142676
288	ENSG00000142798
289	ENSG00000142864
290	ENSG00000142937
291	ENSG00000142949
292	ENSG00000143013
293	ENSG00000143126
294	ENSG00000143321
295	ENSG00000143324
296	ENSG00000143333
297	ENSG00000143384
298	ENSG00000143761
299	ENSG00000143933
300	ENSG00000143947
301	ENSG00000144136
302	ENSG00000144355
303	ENSG00000144713
304	ENSG00000145362
305	ENSG00000145425
306	ENSG00000145495
307	ENSG00000145592
308	ENSG00000145741
309	ENSG00000146386
310	ENSG00000146674
311	ENSG00000147065
312	ENSG00000147140
313	ENSG00000147274
314	ENSG00000147403
315	ENSG00000147604
316	ENSG00000147649
317	ENSG00000147872
318	ENSG00000148053
319	ENSG00000148303
320	ENSG00000148798
321	ENSG00000149273
322	ENSG00000149294
323	ENSG00000149485
324	ENSG00000149639
325	ENSG00000149806
326	ENSG00000149925
327	ENSG00000150625
328	ENSG00000150991
329	ENSG00000152234
330	ENSG00000152558
331	ENSG00000152795
332	ENSG00000152932
333	ENSG00000152977
334	ENSG00000153187
335	ENSG00000154146
336	ENSG00000154277
337	ENSG00000154518
338	ENSG00000154917
339	ENSG00000155368
340	ENSG00000155980
341	ENSG00000156234
342	ENSG00000156482
343	ENSG00000156508
344	ENSG00000156976
345	ENSG00000157064
346	ENSG00000157227
347	ENSG00000157741
348	ENSG00000157851
349	ENSG00000158710
350	ENSG00000158869
351	ENSG00000159164
352	ENSG00000159335
353	ENSG00000159409
354	ENSG00000160007
355	ENSG00000160014
356	ENSG00000160213
357	ENSG00000160255
358	ENSG00000160285
359	ENSG00000161011
360	ENSG00000161016
361	ENSG00000161082
362	ENSG00000161203
363	ENSG00000161970
364	ENSG00000162244
365	ENSG00000162511
366	ENSG00000162512
367	ENSG00000162706
368	ENSG00000162734
369	ENSG00000163041
370	ENSG00000163466
371	ENSG00000163539
372	ENSG00000163682
373	ENSG00000163873
374	ENSG00000163931
375	ENSG00000164091
376	ENSG00000164104
377	ENSG00000164434
378	ENSG00000164587
379	ENSG00000164733
380	ENSG00000164919
381	ENSG00000164924
382	ENSG00000165119
383	ENSG00000165434
384	ENSG00000166165
385	ENSG00000166426
386	ENSG00000166441
387	ENSG00000166598
388	ENSG00000166710
389	ENSG00000166848
390	ENSG00000166913
391	ENSG00000166974
392	ENSG00000167178
393	ENSG00000167283
394	ENSG00000167526
395	ENSG00000167552
396	ENSG00000167553
397	ENSG00000167614
398	ENSG00000167654
399	ENSG00000167658
400	ENSG00000167978
401	ENSG00000167996
402	ENSG00000168028
403	ENSG00000168036
404	ENSG00000168081
405	ENSG00000168280
406	ENSG00000168385
407	ENSG00000168461
408	ENSG00000168824
409	ENSG00000169045
410	ENSG00000169100
411	ENSG00000169429
412	ENSG00000169439
413	ENSG00000169442
414	ENSG00000169710
415	ENSG00000169714
416	ENSG00000169752
417	ENSG00000170004
418	ENSG00000170017
419	ENSG00000170027
420	ENSG00000170091
421	ENSG00000170144
422	ENSG00000170458
423	ENSG00000170558
424	ENSG00000170889
425	ENSG00000171033
426	ENSG00000171533
427	ENSG00000171603
428	ENSG00000171617
429	ENSG00000171858
430	ENSG00000171863
431	ENSG00000172020
432	ENSG00000172270
433	ENSG00000172757
434	ENSG00000172809
435	ENSG00000173267
436	ENSG00000173660
437	ENSG00000173812
438	ENSG00000174444
439	ENSG00000174721
440	ENSG00000174748
441	ENSG00000175061
442	ENSG00000175130
443	ENSG00000175745
444	ENSG00000175899
445	ENSG00000176165
446	ENSG00000176749
447	ENSG00000176788
448	ENSG00000176887
449	ENSG00000177600
450	ENSG00000177733
451	ENSG00000177954
452	ENSG00000178403
453	ENSG00000178719
454	ENSG00000179010
455	ENSG00000179218
456	ENSG00000179222
457	ENSG00000181163
458	ENSG00000181449
459	ENSG00000182095
460	ENSG00000182272
461	ENSG00000182670
462	ENSG00000182768
463	ENSG00000182899
464	ENSG00000182985
465	ENSG00000183688
466	ENSG00000184009
467	ENSG00000184897
468	ENSG00000185551
469	ENSG00000185650
470	ENSG00000185787
471	ENSG00000186469
472	ENSG00000186868
473	ENSG00000187109
474	ENSG00000187514
475	ENSG00000187957
476	ENSG00000188157
477	ENSG00000188322
478	ENSG00000188846
479	ENSG00000189060
480	ENSG00000189159
481	ENSG00000189403
482	ENSG00000196154
483	ENSG00000196230
484	ENSG00000196262
485	ENSG00000196361
486	ENSG00000196405
487	ENSG00000196531
488	ENSG00000196924
489	ENSG00000197102
490	ENSG00000197457
491	ENSG00000197535
492	ENSG00000197694
493	ENSG00000197746
494	ENSG00000197747
495	ENSG00000197756
496	ENSG00000197956
497	ENSG00000197958
498	ENSG00000198034
499	ENSG00000198408
500	ENSG00000198668
501	ENSG00000198695
502	ENSG00000198712
503	ENSG00000198727
504	ENSG00000198755
505	ENSG00000198763
506	ENSG00000198786
507	ENSG00000198804
508	ENSG00000198830
509	ENSG00000198840
510	ENSG00000198886
511	ENSG00000198888
512	ENSG00000198899
513	ENSG00000198910
514	ENSG00000198911
515	ENSG00000198918
516	ENSG00000198938
517	ENSG00000198961
518	ENSG00000203879
519	ENSG00000204469
520	ENSG00000204580
521	ENSG00000204628
522	ENSG00000204843
523	ENSG00000205336
524	ENSG00000205542
525	ENSG00000206503
526	ENSG00000210049
527	ENSG00000210082
528	ENSG00000211459
529	ENSG00000212907
530	ENSG00000213190
531	ENSG00000213420
532	ENSG00000213741
533	ENSG00000213923
534	ENSG00000220205
535	ENSG00000221983
536	ENSG00000225630
537	ENSG00000225783
538	ENSG00000227051
539	ENSG00000228253
540	ENSG00000229117
541	ENSG00000231500
542	ENSG00000231764
543	ENSG00000233276
544	ENSG00000233927
545	ENSG00000234745
546	ENSG00000241697
547	ENSG00000242265
548	ENSG00000242307
549	ENSG00000245532
550	ENSG00000248527
551	ENSG00000249992
552	ENSG00000251562
553	ENSG00000254772
554	ENSG00000258947
555	ENSG00000260032
556	ENSG00000264364
557	ENSG00000265972
558	ENSG00000272325
559	ENSG00000272398
560	ENSG00000274012
561	ENSG00000276293
562	ENSG00000277443
563	ENSG00000277586
564	ENSG00000277632
565	ENSG00000280987

## Sheet: gene symbol
From	To	Species	Gene Name
ENSG00000070961	ATP2B1	Homo sapiens	ATPase plasma membrane Ca2+ transporting 1(ATP2B1)
ENSG00000113657	DPYSL3	Homo sapiens	dihydropyrimidinase like 3(DPYSL3)
ENSG00000162706	CADM3	Homo sapiens	cell adhesion molecule 3(CADM3)
ENSG00000167283	ATP5L	Homo sapiens	ATP synthase, H+ transporting, mitochondrial Fo complex subunit G(ATP5L)
ENSG00000009307	CSDE1	Homo sapiens	cold shock domain containing E1(CSDE1)
ENSG00000034510	TMSB10	Homo sapiens	thymosin beta 10(TMSB10)
ENSG00000123349	PFDN5	Homo sapiens	prefoldin subunit 5(PFDN5)
ENSG00000169100	SLC25A6	Homo sapiens	solute carrier family 25 member 6(SLC25A6)
ENSG00000145495	march6	Homo sapiens	membrane associated ring-CH-type finger 6(MARCH6)
ENSG00000089220	PEBP1	Homo sapiens	phosphatidylethanolamine binding protein 1(PEBP1)
ENSG00000067560	RHOA	Homo sapiens	ras homolog family member A(RHOA)
ENSG00000159409	CELF3	Homo sapiens	CUGBP, Elav-like family member 3(CELF3)
ENSG00000113648	h2afy	Homo sapiens	H2A histone family member Y(H2AFY)
ENSG00000111348	ARHGDIB	Homo sapiens	Rho GDP dissociation inhibitor beta(ARHGDIB)
ENSG00000189060	H1F0	Homo sapiens	H1 histone family member 0(H1F0)
ENSG00000134121	CHL1	Homo sapiens	cell adhesion molecule L1 like(CHL1)
ENSG00000157227	MMP14	Homo sapiens	matrix metallopeptidase 14(MMP14)
ENSG00000168028	RPSA	Homo sapiens	ribosomal protein SA(RPSA)
ENSG00000170458	CD14	Homo sapiens	CD14 molecule(CD14)
ENSG00000172757	CFL1	Homo sapiens	cofilin 1(CFL1)
ENSG00000125538	IL1B	Homo sapiens	interleukin 1 beta(IL1B)
ENSG00000167178	ISLR2	Homo sapiens	immunoglobulin superfamily containing leucine rich repeat 2(ISLR2)
ENSG00000133030	MPRIP	Homo sapiens	myosin phosphatase Rho interacting protein(MPRIP)
ENSG00000088247	MIR3940	Homo sapiens	microRNA 3940(MIR3940)
ENSG00000168385	SEPT2	Homo sapiens	septin 2(SEPT2)
ENSG00000182670	TTC3	Homo sapiens	tetratricopeptide repeat domain 3(TTC3)
ENSG00000163931	TKT	Homo sapiens	transketolase(TKT)
ENSG00000145362	ANK2	Homo sapiens	ankyrin 2(ANK2)
ENSG00000108298	RPL19	Homo sapiens	ribosomal protein L19(RPL19)
ENSG00000108175	ZMIZ1	Homo sapiens	zinc finger MIZ-type containing 1(ZMIZ1)
ENSG00000094916	MIR3198-2	Homo sapiens	microRNA 3198-2(MIR3198-2)
ENSG00000122026	RPL21	Homo sapiens	ribosomal protein L21(RPL21)
ENSG00000086061	DNAJA1	Homo sapiens	DnaJ heat shock protein family (Hsp40) member A1(DNAJA1)
ENSG00000260032	NORAD	Homo sapiens	non-coding RNA activated by DNA damage(NORAD)
ENSG00000137726	FXYD6	Homo sapiens	FXYD domain containing ion transport regulator 6(FXYD6)
ENSG00000104722	NEFM	Homo sapiens	neurofilament, medium polypeptide(NEFM)
ENSG00000145592	RPL37	Homo sapiens	ribosomal protein L37(RPL37)
ENSG00000044574	HSPA5	Homo sapiens	heat shock protein family A (Hsp70) member 5(HSPA5)
ENSG00000047849	MAP4	Homo sapiens	microtubule associated protein 4(MAP4)
ENSG00000197956	S100A6	Homo sapiens	S100 calcium binding protein A6(S100A6)
ENSG00000198804	COX1	Homo sapiens	cytochrome c oxidase subunit I(COX1)
ENSG00000198918	RPL39	Homo sapiens	ribosomal protein L39(RPL39)
ENSG00000142089	IFITM3	Homo sapiens	interferon induced transmembrane protein 3(IFITM3)
ENSG00000111371	SLC38A1	Homo sapiens	solute carrier family 38 member 1(SLC38A1)
ENSG00000168036	CTNNB1	Homo sapiens	catenin beta 1(CTNNB1)
ENSG00000156482	RPL30	Homo sapiens	ribosomal protein L30(RPL30)
ENSG00000092964	DPYSL2	Homo sapiens	dihydropyrimidinase like 2(DPYSL2)
ENSG00000063177	RPL18	Homo sapiens	ribosomal protein L18(RPL18)
ENSG00000162734	PEA15	Homo sapiens	phosphoprotein enriched in astrocytes 15(PEA15)
ENSG00000251562	MALAT1	Homo sapiens	metastasis associated lung adenocarcinoma transcript 1 (non-protein coding)(MALAT1)
ENSG00000101210	EEF1A2	Homo sapiens	eukaryotic translation elongation factor 1 alpha 2(EEF1A2)
ENSG00000164919	COX6C	Homo sapiens	cytochrome c oxidase subunit 6C(COX6C)
ENSG00000156234	CXCL13	Homo sapiens	C-X-C motif chemokine ligand 13(CXCL13)
ENSG00000092841	MYL6	Homo sapiens	myosin light chain 6(MYL6)
ENSG00000174721	FGFBP3	Homo sapiens	fibroblast growth factor binding protein 3(FGFBP3)
ENSG00000142192	APP	Homo sapiens	amyloid beta precursor protein(APP)
ENSG00000198910	L1CAM	Homo sapiens	L1 cell adhesion molecule(L1CAM)
ENSG00000170004	CHD3	Homo sapiens	chromodomain helicase DNA binding protein 3(CHD3)
ENSG00000168280	KIF5C	Homo sapiens	kinesin family member 5C(KIF5C)
ENSG00000006125	AP2B1	Homo sapiens	adaptor related protein complex 2 beta 1 subunit(AP2B1)
ENSG00000198911	SREBF2	Homo sapiens	sterol regulatory element binding transcription factor 2(SREBF2)
ENSG00000147649	MTDH	Homo sapiens	metadherin(MTDH)
ENSG00000087258	GNAO1	Homo sapiens	G protein subunit alpha o1(GNAO1)
ENSG00000124422	USP22	Homo sapiens	ubiquitin specific peptidase 22(USP22)
ENSG00000164924	YWHAZ	Homo sapiens	tyrosine 3-monooxygenase/tryptophan 5-monooxygenase activation protein zeta(YWHAZ)
ENSG00000146674	IGFBP3	Homo sapiens	insulin like growth factor binding protein 3(IGFBP3)
ENSG00000147403	RPL10	Homo sapiens	ribosomal protein L10(RPL10)
ENSG00000144136	SLC20A1	Homo sapiens	solute carrier family 20 member 1(SLC20A1)
ENSG00000011422	PLAUR	Homo sapiens	plasminogen activator, urokinase receptor(PLAUR)
ENSG00000135406	PRPH	Homo sapiens	peripherin(PRPH)
ENSG00000046653	GPM6B	Homo sapiens	glycoprotein M6B(GPM6B)
ENSG00000135404	CD63	Homo sapiens	CD63 molecule(CD63)
ENSG00000018189	RUFY3	Homo sapiens	RUN and FYVE domain containing 3(RUFY3)
ENSG00000119283	TRIM67	Homo sapiens	tripartite motif containing 67(TRIM67)
ENSG00000077279	DCX	Homo sapiens	doublecortin(DCX)
ENSG00000111674	ENO2	Homo sapiens	enolase 2(ENO2)
ENSG00000137942	FNBP1L	Homo sapiens	formin binding protein 1 like(FNBP1L)
ENSG00000111676	ATN1	Homo sapiens	atrophin 1(ATN1)
ENSG00000104904	OAZ1	Homo sapiens	ornithine decarboxylase antizyme 1(OAZ1)
ENSG00000134313	KIDINS220	Homo sapiens	kinase D-interacting substrate 220kDa(KIDINS220)
ENSG00000136854	STXBP1	Homo sapiens	syntaxin binding protein 1(STXBP1)
ENSG00000170017	ALCAM	Homo sapiens	activated leukocyte cell adhesion molecule(ALCAM)
ENSG00000196405	EVL	Homo sapiens	Enah/Vasp-like(EVL)
ENSG00000198938	COX3	Homo sapiens	cytochrome c oxidase III(COX3)
ENSG00000147872	PLIN2	Homo sapiens	perilipin 2(PLIN2)
ENSG00000162512	SDC3	Homo sapiens	syndecan 3(SDC3)
ENSG00000109475	RPL34	Homo sapiens	ribosomal protein L34(RPL34)
ENSG00000109472	CPE	Homo sapiens	carboxypeptidase E(CPE)
ENSG00000272325	NUDT3	Homo sapiens	nudix hydrolase 3(NUDT3)
ENSG00000070756	MIR7705	Homo sapiens	microRNA 7705(MIR7705)
ENSG00000160213	CSTB	Homo sapiens	cystatin B(CSTB)
ENSG00000087086	FTL	Homo sapiens	ferritin light chain(FTL)
ENSG00000162511	LAPTM5	Homo sapiens	lysosomal protein transmembrane 5(LAPTM5)
ENSG00000155368	DBI	Homo sapiens	diazepam binding inhibitor, acyl-CoA binding protein(DBI)
ENSG00000153187	HNRNPU	Homo sapiens	heterogeneous nuclear ribonucleoprotein U(HNRNPU)
ENSG00000072832	CRMP1	Homo sapiens	collapsin response mediator protein 1(CRMP1)
ENSG00000154277	UCHL1	Homo sapiens	ubiquitin C-terminal hydrolase L1(UCHL1)
ENSG00000078018	MAP2	Homo sapiens	microtubule associated protein 2(MAP2)
ENSG00000111669	TPI1	Homo sapiens	triosephosphate isomerase 1(TPI1)
ENSG00000170144	MIR4444-1	Homo sapiens	microRNA 4444-1(MIR4444-1)
ENSG00000135535	CD164	Homo sapiens	CD164 molecule(CD164)
ENSG00000133112	TPT1	Homo sapiens	tumor protein, translationally-controlled 1(TPT1)
ENSG00000170027	YWHAG	Homo sapiens	tyrosine 3-monooxygenase/tryptophan 5-monooxygenase activation protein gamma(YWHAG)
ENSG00000204580	MIR4640	Homo sapiens	microRNA 4640(MIR4640)
ENSG00000149806	FAU	Homo sapiens	FAU, ubiquitin like and ribosomal protein S30 fusion(FAU)
ENSG00000197958	RPL12	Homo sapiens	ribosomal protein L12(RPL12)
ENSG00000204469	PRRC2A	Homo sapiens	proline rich coiled-coil 2A(PRRC2A)
ENSG00000149925	ALDOA	Homo sapiens	aldolase, fructose-bisphosphate A(ALDOA)
ENSG00000126709	IFI6	Homo sapiens	interferon alpha inducible protein 6(IFI6)
ENSG00000079215	SLC1A3	Homo sapiens	solute carrier family 1 member 3(SLC1A3)
ENSG00000078369	GNB1	Homo sapiens	G protein subunit beta 1(GNB1)
ENSG00000079459	FDFT1	Homo sapiens	farnesyl-diphosphate farnesyltransferase 1(FDFT1)
ENSG00000143384	MCL1	Homo sapiens	BCL2 family apoptosis regulator(MCL1)
ENSG00000124766	SOX4	Homo sapiens	SRY-box 4(SOX4)
ENSG00000183688	RFLNB	Homo sapiens	refilin B(RFLNB)
ENSG00000144355	DLX1	Homo sapiens	distal-less homeobox 1(DLX1)
ENSG00000184897	H1FX	Homo sapiens	H1 histone family member X(H1FX)
ENSG00000124762	CDKN1A	Homo sapiens	cyclin dependent kinase inhibitor 1A(CDKN1A)
ENSG00000154146	NRGN	Homo sapiens	neurogranin(NRGN)
ENSG00000158869	FCER1G	Homo sapiens	Fc fragment of IgE receptor Ig(FCER1G)
ENSG00000173660	Uqcrh	Homo sapiens	ubiquinol-cytochrome c reductase hinge protein(UQCRH)
ENSG00000113758	DBN1	Homo sapiens	drebrin 1(DBN1)
ENSG00000198840	ND3	Homo sapiens	NADH dehydrogenase, subunit 3 (complex I)(ND3)
ENSG00000198961	PJA2	Homo sapiens	praja ring finger ubiquitin ligase 2(PJA2)
ENSG00000112306	RPS12	Homo sapiens	ribosomal protein S12(RPS12)
ENSG00000181163	NPM1	Homo sapiens	nucleophosmin(NPM1)
ENSG00000130294	KIF1A	Homo sapiens	kinesin family member 1A(KIF1A)
ENSG00000205542	TMSB4X	Homo sapiens	thymosin beta 4, X-linked(TMSB4X)
ENSG00000197756	RPL37A	Homo sapiens	ribosomal protein L37a(RPL37A)
ENSG00000132475	MIR4738	Homo sapiens	microRNA 4738(MIR4738)
ENSG00000198727	CYTB	Homo sapiens	cytochrome b(CYTB)
ENSG00000174748	RPL15	Homo sapiens	ribosomal protein L15(RPL15)
ENSG00000089009	RPL6	Homo sapiens	ribosomal protein L6(RPL6)
ENSG00000169045	HNRNPH1	Homo sapiens	heterogeneous nuclear ribonucleoprotein H1 (H)(HNRNPH1)
ENSG00000185650	ZFP36L1	Homo sapiens	ZFP36 ring finger protein like 1(ZFP36L1)
ENSG00000090104	RGS1	Homo sapiens	regulator of G-protein signaling 1(RGS1)
ENSG00000100201	DDX17	Homo sapiens	DEAD-box helicase 17(DDX17)
ENSG00000186868	MAPT	Homo sapiens	microtubule associated protein tau(MAPT)
ENSG00000187957	DNER	Homo sapiens	delta/notch like EGF repeat containing(DNER)
ENSG00000143013	LMO4	Homo sapiens	LIM domain only 4(LMO4)
ENSG00000100320	RBFOX2	Homo sapiens	RNA binding protein, fox-1 homolog 2(RBFOX2)
ENSG00000161203	AP2M1	Homo sapiens	adaptor related protein complex 2 mu 1 subunit(AP2M1)
ENSG00000137818	RPLP1	Homo sapiens	ribosomal protein lateral stalk subunit P1(RPLP1)
ENSG00000118181	RPS25	Homo sapiens	ribosomal protein S25(RPS25)
ENSG00000067225	PKM	Homo sapiens	pyruvate kinase, muscle(PKM)
ENSG00000134308	YWHAQ	Homo sapiens	tyrosine 3-monooxygenase/tryptophan 5-monooxygenase activation protein theta(YWHAQ)
ENSG00000196531	NACA	Homo sapiens	nascent polypeptide-associated complex alpha subunit(NACA)
ENSG00000198830	HMGN2	Homo sapiens	high mobility group nucleosomal binding domain 2(HMGN2)
ENSG00000008988	RPS20	Homo sapiens	ribosomal protein S20(RPS20)
ENSG00000112531	QKI	Homo sapiens	QKI, KH domain containing RNA binding(QKI)
ENSG00000198712	COX2	Homo sapiens	cytochrome c oxidase subunit II(COX2)
ENSG00000130066	SAT1	Homo sapiens	spermidine/spermine N1-acetyltransferase 1(SAT1)
ENSG00000197746	PSAP	Homo sapiens	prosaposin(PSAP)
ENSG00000197747	S100A10	Homo sapiens	S100 calcium binding protein A10(S100A10)
ENSG00000168081	PNOC	Homo sapiens	prepronociceptin(PNOC)
ENSG00000143126	CELSR2	Homo sapiens	cadherin EGF LAG seven-pass G-type receptor 2(CELSR2)
ENSG00000145425	RPS3A	Homo sapiens	ribosomal protein S3A(RPS3A)
ENSG00000142156	COL6A1	Homo sapiens	collagen type VI alpha 1 chain(COL6A1)
ENSG00000147604	RPL7	Homo sapiens	ribosomal protein L7(RPL7)
ENSG00000100316	RPL3	Homo sapiens	ribosomal protein L3(RPL3)
ENSG00000206503	hla-a	Homo sapiens	major histocompatibility complex, class I, A(HLA-A)
ENSG00000123416	TUBA1B	Homo sapiens	tubulin alpha 1b(TUBA1B)
ENSG00000122566	HNRNPA2B1	Homo sapiens	heterogeneous nuclear ribonucleoprotein A2/B1(HNRNPA2B1)
ENSG00000160007	arhgap35	Homo sapiens	Rho GTPase activating protein 35(ARHGAP35)
ENSG00000163873	GRIK3	Homo sapiens	glutamate ionotropic receptor kainate type subunit 3(GRIK3)
ENSG00000108107	MIR6805	Homo sapiens	microRNA 6805(MIR6805)
ENSG00000074800	ENO1	Homo sapiens	enolase 1(ENO1)
ENSG00000213420	GPC2	Homo sapiens	glypican 2(GPC2)
ENSG00000118271	TTR	Homo sapiens	transthyretin(TTR)
ENSG00000197535	MYO5A	Homo sapiens	myosin VA(MYO5A)
ENSG00000175745	NR2F1	Homo sapiens	nuclear receptor subfamily 2 group F member 1(NR2F1)
ENSG00000084731	KIF3C	Homo sapiens	kinesin family member 3C(KIF3C)
ENSG00000102804	TSC22D1	Homo sapiens	TSC22 domain family member 1(TSC22D1)
ENSG00000100985	MMP9	Homo sapiens	matrix metallopeptidase 9(MMP9)
ENSG00000185551	MIR1469	Homo sapiens	microRNA 1469(MIR1469)
ENSG00000105193	RPS16	Homo sapiens	ribosomal protein S16(RPS16)
ENSG00000166913	YWHAB	Homo sapiens	tyrosine 3-monooxygenase/tryptophan 5-monooxygenase activation protein beta(YWHAB)
ENSG00000160014	CALM3	Homo sapiens	calmodulin 3(CALM3)
ENSG00000160255	ITGB2	Homo sapiens	integrin subunit beta 2(ITGB2)
ENSG00000233276	GPX1	Homo sapiens	glutathione peroxidase 1(GPX1)
ENSG00000164733	CTSB	Homo sapiens	cathepsin B(CTSB)
ENSG00000095970	TREM2	Homo sapiens	triggering receptor expressed on myeloid cells 2(TREM2)
ENSG00000133318	RTN3	Homo sapiens	reticulon 3(RTN3)
ENSG00000048740	CELF2	Homo sapiens	CUGBP, Elav-like family member 2(CELF2)
ENSG00000091136	LAMB1	Homo sapiens	laminin subunit beta 1(LAMB1)
ENSG00000171033	PKIA	Homo sapiens	protein kinase (cAMP-dependent, catalytic) inhibitor alpha(PKIA)
ENSG00000110651	CD81	Homo sapiens	CD81 molecule(CD81)
ENSG00000132341	RAN	Homo sapiens	RAN, member RAS oncogene family(RAN)
ENSG00000157741	UBN2	Homo sapiens	ubinuclein 2(UBN2)
ENSG00000158710	TAGLN2	Homo sapiens	transgelin 2(TAGLN2)
ENSG00000136942	RPL35	Homo sapiens	ribosomal protein L35(RPL35)
ENSG00000130287	NCAN	Homo sapiens	neurocan(NCAN)
ENSG00000225783	Miat	Homo sapiens	myocardial infarction associated transcript (non-protein coding)(MIAT)
ENSG00000182272	b4galnt4	Homo sapiens	beta-1,4-N-acetyl-galactosaminyltransferase 4(B4GALNT4)
ENSG00000185787	MORF4L1	Homo sapiens	mortality factor 4 like 1(MORF4L1)
ENSG00000106153	CHCHD2	Homo sapiens	coiled-coil-helix-coiled-coil-helix domain containing 2(CHCHD2)
ENSG00000106278	PTPRZ1	Homo sapiens	protein tyrosine phosphatase, receptor type Z1(PTPRZ1)
ENSG00000131469	RPL27	Homo sapiens	ribosomal protein L27(RPL27)
ENSG00000089280	FUS	Homo sapiens	FUS RNA binding protein(FUS)
ENSG00000163539	CLASP2	Homo sapiens	cytoplasmic linker associated protein 2(CLASP2)
ENSG00000111897	SERINC1	Homo sapiens	serine incorporator 1(SERINC1)
ENSG00000198763	ND2	Homo sapiens	MTND2(ND2)
ENSG00000198886	ND4	Homo sapiens	NADH dehydrogenase, subunit 4 (complex I)(ND4)
ENSG00000110321	EIF4G2	Homo sapiens	eukaryotic translation initiation factor 4 gamma 2(EIF4G2)
ENSG00000198888	ND1	Homo sapiens	NADH dehydrogenase, subunit 1 (complex I)(ND1)
ENSG00000131584	acap3	Homo sapiens	ArfGAP with coiled-coil, ankyrin repeat and PH domains 3(ACAP3)
ENSG00000157851	DPYSL5	Homo sapiens	dihydropyrimidinase like 5(DPYSL5)
ENSG00000198408	MGEA5	Homo sapiens	meningioma expressed antigen 5 (hyaluronidase)(MGEA5)
ENSG00000130255	RPL36	Homo sapiens	ribosomal protein L36(RPL36)
ENSG00000249992	TMEM158	Homo sapiens	transmembrane protein 158 (gene/pseudogene)(TMEM158)
ENSG00000079246	XRCC5	Homo sapiens	X-ray repair cross complementing 5(XRCC5)
ENSG00000187514	MIR1244-1	Homo sapiens	microRNA 1244-1(MIR1244-1)
ENSG00000108001	EBF3	Homo sapiens	early B-cell factor 3(EBF3)
ENSG00000184009	ACTG1	Homo sapiens	actin gamma 1(ACTG1)
ENSG00000143333	RGS16	Homo sapiens	regulator of G-protein signaling 16(RGS16)
ENSG00000188846	RPL14	Homo sapiens	ribosomal protein L14(RPL14)
ENSG00000131236	CAP1	Homo sapiens	adenylate cyclase associated protein 1(CAP1)
ENSG00000132688	NES	Homo sapiens	nestin(NES)
ENSG00000134986	NREP	Homo sapiens	neuronal regeneration related protein(NREP)
ENSG00000131238	PPT1	Homo sapiens	palmitoyl-protein thioesterase 1(PPT1)
ENSG00000172020	GAP43	Homo sapiens	growth associated protein 43(GAP43)
ENSG00000112972	HMGCS1	Homo sapiens	3-hydroxy-3-methylglutaryl-CoA synthase 1(HMGCS1)
ENSG00000111640	GAPDH	Homo sapiens	glyceraldehyde-3-phosphate dehydrogenase(GAPDH)
ENSG00000083845	RPS5	Homo sapiens	ribosomal protein S5(RPS5)
ENSG00000174444	RPL4	Homo sapiens	ribosomal protein L4(RPL4)
ENSG00000111642	CHD4	Homo sapiens	chromodomain helicase DNA binding protein 4(CHD4)
ENSG00000198755	RPL10A	Homo sapiens	ribosomal protein L10a(RPL10A)
ENSG00000176749	CDK5R1	Homo sapiens	cyclin dependent kinase 5 regulatory subunit 1(CDK5R1)
ENSG00000131473	ACLY	Homo sapiens	ATP citrate lyase(ACLY)
ENSG00000177954	RPS27	Homo sapiens	ribosomal protein S27(RPS27)
ENSG00000175899	A2M	Homo sapiens	alpha-2-macroglobulin(A2M)
ENSG00000101608	MYL12A	Homo sapiens	myosin light chain 12A(MYL12A)
ENSG00000143324	XPR1	Homo sapiens	xenotropic and polytropic retrovirus receptor 1(XPR1)
ENSG00000099194	SCD	Homo sapiens	stearoyl-CoA desaturase(SCD)
ENSG00000161011	SQSTM1	Homo sapiens	sequestosome 1(SQSTM1)
ENSG00000160285	LSS	Homo sapiens	lanosterol synthase (2,3-oxidosqualene-lanosterol cyclase)(LSS)
ENSG00000122406	RPL5	Homo sapiens	ribosomal protein L5(RPL5)
ENSG00000089157	RPLP0	Homo sapiens	ribosomal protein lateral stalk subunit P0(RPLP0)
ENSG00000145741	BTF3	Homo sapiens	basic transcription factor 3(BTF3)
ENSG00000143321	HDGF	Homo sapiens	hepatoma-derived growth factor(HDGF)
ENSG00000122641	INHBA	Homo sapiens	inhibin beta A subunit(INHBA)
ENSG00000161016	MIR6850	Homo sapiens	microRNA 6850(MIR6850)
ENSG00000071575	TRIB2	Homo sapiens	tribbles pseudokinase 2(TRIB2)
ENSG00000170091	HMP19	Homo sapiens	HMP19 protein(HMP19)
ENSG00000172270	BSG	Homo sapiens	basigin (Ok blood group)(BSG)
ENSG00000111716	LDHB	Homo sapiens	lactate dehydrogenase B(LDHB)
ENSG00000196361	ELAVL3	Homo sapiens	ELAV like RNA binding protein 3(ELAVL3)
ENSG00000197694	SPTAN1	Homo sapiens	spectrin alpha, non-erythrocytic 1(SPTAN1)
ENSG00000127184	MIR3607	Homo sapiens	microRNA 3607(MIR3607)
ENSG00000198786	ND5	Homo sapiens	NADH dehydrogenase, subunit 5 (complex I)(ND5)
ENSG00000156508	EEF1A1	Homo sapiens	eukaryotic translation elongation factor 1 alpha 1(EEF1A1)
ENSG00000197457	STMN3	Homo sapiens	stathmin 3(STMN3)
ENSG00000198668	CALM1	Homo sapiens	calmodulin 1(CALM1)
ENSG00000177600	RPLP2	Homo sapiens	ribosomal protein lateral stalk subunit P2(RPLP2)
ENSG00000117016	RIMS3	Homo sapiens	regulating synaptic membrane exocytosis 3(RIMS3)
ENSG00000163682	RPL9	Homo sapiens	ribosomal protein L9(RPL9)
ENSG00000139289	PHLDA1	Homo sapiens	pleckstrin homology like domain family A member 1(PHLDA1)
ENSG00000135919	SERPINE2	Homo sapiens	serpin family E member 2(SERPINE2)
ENSG00000138071	ACTR2	Homo sapiens	ARP2 actin related protein 2 homolog(ACTR2)
ENSG00000166710	B2M	Homo sapiens	beta-2-microglobulin(B2M)
ENSG00000196230	TUBB	Homo sapiens	tubulin beta class I(TUBB)
ENSG00000133639	BTG1	Homo sapiens	BTG anti-proliferation factor 1(BTG1)
ENSG00000198899	ATP6	Homo sapiens	ATP synthase F0 subunit 6(ATP6)
ENSG00000177733	HNRNPA0	Homo sapiens	heterogeneous nuclear ribonucleoprotein A0(HNRNPA0)
ENSG00000156976	MIR1248	Homo sapiens	microRNA 1248(MIR1248)
ENSG00000176887	SOX11	Homo sapiens	SRY-box 11(SOX11)
ENSG00000119335	SET	Homo sapiens	SET nuclear proto-oncogene(SET)
ENSG00000133872	SARAF	Homo sapiens	store-operated calcium entry associated regulatory factor(SARAF)
ENSG00000166848	LOC105371348	Homo sapiens	uncharacterized LOC105371348(LOC105371348)
ENSG00000162244	RPL29	Homo sapiens	ribosomal protein L29(RPL29)
ENSG00000204628	RACK1	Homo sapiens	receptor for activated C kinase 1(RACK1)
ENSG00000121774	KHDRBS1	Homo sapiens	KH RNA binding domain containing, signal transduction associated 1(KHDRBS1)
ENSG00000108654	Mir3064	Homo sapiens	microRNA 3064(MIR3064)
ENSG00000122862	SRGN	Homo sapiens	serglycin(SRGN)
ENSG00000141367	CLTC	Homo sapiens	clathrin heavy chain(CLTC)
ENSG00000196262	PPIA	Homo sapiens	peptidylprolyl isomerase A(PPIA)
ENSG00000173267	SNCG	Homo sapiens	synuclein gamma(SNCG)
ENSG00000077097	MIR4442	Homo sapiens	microRNA 4442(MIR4442)
ENSG00000132872	SYT4	Homo sapiens	synaptotagmin 4(SYT4)
ENSG00000140264	SERF2	Homo sapiens	small EDRK-rich factor 2(SERF2)
ENSG00000105290	APLP1	Homo sapiens	amyloid beta precursor like protein 1(APLP1)
ENSG00000186469	GNG2	Homo sapiens	G protein subunit gamma 2(GNG2)
ENSG00000109654	TRIM2	Homo sapiens	tripartite motif containing 2(TRIM2)
ENSG00000164434	FABP7	Homo sapiens	fatty acid binding protein 7(FABP7)
ENSG00000166974	MAPRE2	Homo sapiens	microtubule associated protein RP/EB family member 2(MAPRE2)
ENSG00000163466	ARPC2	Homo sapiens	actin related protein 2/3 complex subunit 2(ARPC2)
ENSG00000052802	MSMO1	Homo sapiens	methylsterol monooxygenase 1(MSMO1)
ENSG00000134824	FADS2	Homo sapiens	fatty acid desaturase 2(FADS2)
ENSG00000129351	ILF3	Homo sapiens	interleukin enhancer binding factor 3(ILF3)
ENSG00000155980	KIF5A	Homo sapiens	kinesin family member 5A(KIF5A)
ENSG00000135916	ITM2C	Homo sapiens	integral membrane protein 2C(ITM2C)
ENSG00000197102	DYNC1H1	Homo sapiens	dynein cytoplasmic 1 heavy chain 1(DYNC1H1)
ENSG00000176788	BASP1	Homo sapiens	brain abundant membrane attached signal protein 1(BASP1)
ENSG00000152234	ATP5A1	Homo sapiens	ATP synthase, H+ transporting, mitochondrial F1 complex, alpha subunit 1, cardiac muscle(ATP5A1)
ENSG00000204843	DCTN1	Homo sapiens	dynactin subunit 1(DCTN1)
ENSG00000182095	TNRC18	Homo sapiens	trinucleotide repeat containing 18(TNRC18)
ENSG00000178719	GRINA	Homo sapiens	glutamate ionotropic receptor NMDA type subunit associated protein 1(GRINA)
ENSG00000203879	GDI1	Homo sapiens	GDP dissociation inhibitor 1(GDI1)
ENSG00000143761	MIR3620	Homo sapiens	microRNA 3620(MIR3620)
ENSG00000142798	HSPG2	Homo sapiens	heparan sulfate proteoglycan 2(HSPG2)
ENSG00000142676	RPL11	Homo sapiens	ribosomal protein L11(RPL11)
ENSG00000127022	CANX	Homo sapiens	calnexin(CANX)
ENSG00000149294	NCAM1	Homo sapiens	neural cell adhesion molecule 1(NCAM1)
ENSG00000092199	HNRNPC	Homo sapiens	heterogeneous nuclear ribonucleoprotein C (C1/C2)(HNRNPC)
ENSG00000110700	RPS13	Homo sapiens	ribosomal protein S13(RPS13)
ENSG00000242265	PEG10	Homo sapiens	paternally expressed 10(PEG10)
ENSG00000245532	NEAT1	Homo sapiens	nuclear paraspeckle assembly transcript 1 (non-protein coding)(NEAT1)
ENSG00000084207	GSTP1	Homo sapiens	glutathione S-transferase pi 1(GSTP1)
ENSG00000142541	RPL13A	Homo sapiens	ribosomal protein L13a(RPL13A)
ENSG00000117450	PRDX1	Homo sapiens	peroxiredoxin 1(PRDX1)
ENSG00000081189	MEF2C	Homo sapiens	myocyte enhancer factor 2C(MEF2C)
ENSG00000142669	SH3BGRL3	Homo sapiens	SH3 domain binding glutamate rich protein like 3(SH3BGRL3)
ENSG00000105223	PLD3	Homo sapiens	phospholipase D family member 3(PLD3)
ENSG00000128245	YWHAH	Homo sapiens	tyrosine 3-monooxygenase/tryptophan 5-monooxygenase activation protein eta(YWHAH)
ENSG00000075624	ACTB	Homo sapiens	actin beta(ACTB)
ENSG00000198695	ND6	Homo sapiens	NADH dehydrogenase, subunit 6 (complex I)(ND6)
ENSG00000196154	S100A4	Homo sapiens	S100 calcium binding protein A4(S100A4)
ENSG00000276293	PIP4K2B	Homo sapiens	phosphatidylinositol-5-phosphate 4-kinase type 2 beta(PIP4K2B)
ENSG00000154518	ATP5G3	Homo sapiens	ATP synthase, H+ transporting, mitochondrial Fo complex subunit C3 (subunit 9)(ATP5G3)
ENSG00000115268	RPS15	Homo sapiens	ribosomal protein S15(RPS15)
ENSG00000115266	APC2	Homo sapiens	APC2, WNT signaling pathway regulator(APC2)
ENSG00000038427	VCAN	Homo sapiens	versican(VCAN)
ENSG00000144713	RPL32	Homo sapiens	ribosomal protein L32(RPL32)
ENSG00000120885	MIR6843	Homo sapiens	microRNA 6843(MIR6843)
ENSG00000131409	lrrc4b	Homo sapiens	leucine rich repeat containing 4B(LRRC4B)
ENSG00000167614	TTYH1	Homo sapiens	tweety family member 1(TTYH1)
ENSG00000164587	RPS14	Homo sapiens	ribosomal protein S14(RPS14)
ENSG00000168824	NSG1	Homo sapiens	neuron specific gene family member 1(NSG1)
ENSG00000075618	FSCN1	Homo sapiens	fascin actin-bundling protein 1(FSCN1)
ENSG00000142534	RPS11	Homo sapiens	ribosomal protein S11(RPS11)
ENSG00000164104	HMGB2	Homo sapiens	high mobility group box 2(HMGB2)
ENSG00000165434	PGM2L1	Homo sapiens	phosphoglucomutase 2 like 1(PGM2L1)
ENSG00000167978	SRRM2	Homo sapiens	serine/arginine repetitive matrix 2(SRRM2)
ENSG00000149273	RPS3	Homo sapiens	ribosomal protein S3(RPS3)
ENSG00000069275	NUCKS1	Homo sapiens	nuclear casein kinase and cyclin dependent kinase substrate 1(NUCKS1)
ENSG00000133805	AMPD3	Homo sapiens	adenosine monophosphate deaminase 3(AMPD3)
ENSG00000131747	TOP2A	Homo sapiens	topoisomerase (DNA) II alpha(TOP2A)
ENSG00000041982	TNC	Homo sapiens	tenascin C(TNC)
ENSG00000213923	LOC400927-CSNK1E	Homo sapiens	LOC400927-CSNK1E readthrough(LOC400927-CSNK1E)
ENSG00000136193	SCRN1	Homo sapiens	secernin 1(SCRN1)
ENSG00000137285	TUBB2B	Homo sapiens	tubulin beta 2B class IIb(TUBB2B)
ENSG00000161082	CELF5	Homo sapiens	CUGBP, Elav-like family member 5(CELF5)
ENSG00000115053	NCL	Homo sapiens	nucleolin(NCL)
ENSG00000117592	PRDX6	Homo sapiens	peroxiredoxin 6(PRDX6)
ENSG00000188322	SBK1	Homo sapiens	SH3 domain binding kinase 1(SBK1)
ENSG00000105372	RPS19	Homo sapiens	ribosomal protein S19(RPS19)
ENSG00000105373	GLTSCR2	Homo sapiens	glioma tumor suppressor candidate region gene 2(GLTSCR2)
ENSG00000109971	HSPA8	Homo sapiens	heat shock protein family A (Hsp70) member 8(HSPA8)
ENSG00000110955	ATP5B	Homo sapiens	ATP synthase, H+ transporting, mitochondrial F1 complex, beta polypeptide(ATP5B)
ENSG00000175130	MARCKSL1	Homo sapiens	MARCKS like 1(MARCKSL1)
ENSG00000132965	ALOX5AP	Homo sapiens	arachidonate 5-lipoxygenase activating protein(ALOX5AP)
ENSG00000108518	PFN1	Homo sapiens	profilin 1(PFN1)
ENSG00000220205	VAMP2	Homo sapiens	vesicle associated membrane protein 2(VAMP2)
ENSG00000148053	NTRK2	Homo sapiens	neurotrophic receptor tyrosine kinase 2(NTRK2)
ENSG00000152558	TMEM123	Homo sapiens	transmembrane protein 123(TMEM123)
ENSG00000178403	NEUROG2	Homo sapiens	neurogenin 2(NEUROG2)
ENSG00000152795	HNRNPDL	Homo sapiens	heterogeneous nuclear ribonucleoprotein D like(HNRNPDL)
ENSG00000118785	SPP1	Homo sapiens	secreted phosphoprotein 1(SPP1)
ENSG00000100906	NFKBIA	Homo sapiens	NFKB inhibitor alpha(NFKBIA)
ENSG00000167996	FTH1	Homo sapiens	ferritin heavy chain 1(FTH1)
ENSG00000116133	DHCR24	Homo sapiens	24-dehydrocholesterol reductase(DHCR24)
ENSG00000116251	RPL22	Homo sapiens	ribosomal protein L22(RPL22)
ENSG00000132718	SYT11	Homo sapiens	synaptotagmin 11(SYT11)
ENSG00000131507	NDFIP1	Homo sapiens	Nedd4 family interacting protein 1(NDFIP1)
ENSG00000189403	HMGB1	Homo sapiens	high mobility group box 1(HMGB1)
ENSG00000166426	CRABP1	Homo sapiens	cellular retinoic acid binding protein 1(CRABP1)
ENSG00000187109	NAP1L1	Homo sapiens	nucleosome assembly protein 1 like 1(NAP1L1)
ENSG00000213741	LOC100288910	Homo sapiens	uncharacterized LOC100288910(LOC100288910)
ENSG00000075415	SLC25A3	Homo sapiens	solute carrier family 25 member 3(SLC25A3)
ENSG00000071054	map4k4	Homo sapiens	mitogen-activated protein kinase kinase kinase kinase 4(MAP4K4)
ENSG00000130513	GDF15	Homo sapiens	growth differentiation factor 15(GDF15)
ENSG00000070087	PFN2	Homo sapiens	profilin 2(PFN2)
ENSG00000099622	CIRBP	Homo sapiens	cold inducible RNA binding protein(CIRBP)
ENSG00000120708	TGFBI	Homo sapiens	transforming growth factor beta induced(TGFBI)
ENSG00000108828	VAT1	Homo sapiens	vesicle amine transport 1(VAT1)
ENSG00000137267	TUBB2A	Homo sapiens	tubulin beta 2A class IIa(TUBB2A)
ENSG00000065978	YBX1	Homo sapiens	Y-box binding protein 1(YBX1)
ENSG00000116560	SFPQ	Homo sapiens	splicing factor proline and glutamine rich(SFPQ)
ENSG00000136295	TTYH3	Homo sapiens	tweety family member 3(TTYH3)
ENSG00000163041	H3F3A	Homo sapiens	H3 histone family member 3A(H3F3A)
ENSG00000167526	RPL13	Homo sapiens	ribosomal protein L13(RPL13)
ENSG00000142864	SERBP1	Homo sapiens	SERPINE1 mRNA binding protein 1(SERBP1)
ENSG00000015479	MATR3	Homo sapiens	matrin 3(MATR3)
ENSG00000128564	VGF	Homo sapiens	VGF nerve growth factor inducible(VGF)
ENSG00000130522	jund	Homo sapiens	JunD proto-oncogene, AP-1 transcription factor subunit(JUND)
ENSG00000130402	ACTN4	Homo sapiens	actinin alpha 4(ACTN4)
ENSG00000147065	MSN	Homo sapiens	moesin(MSN)
ENSG00000149485	MIR1908	Homo sapiens	microRNA 1908(MIR1908)
ENSG00000105426	PTPRS	Homo sapiens	protein tyrosine phosphatase, receptor type S(PTPRS)
ENSG00000264364	DYNLL2	Homo sapiens	dynein light chain LC8-type 2(DYNLL2)
ENSG00000167654	ATCAY	Homo sapiens	ATCAY, caytaxin(ATCAY)
ENSG00000113161	HMGCR	Homo sapiens	3-hydroxy-3-methylglutaryl-CoA reductase(HMGCR)
ENSG00000169710	FASN	Homo sapiens	fatty acid synthase(FASN)
ENSG00000159164	SV2A	Homo sapiens	synaptic vesicle glycoprotein 2A(SV2A)
ENSG00000137154	RPS6	Homo sapiens	ribosomal protein S6(RPS6)
ENSG00000280987	MATR3	Homo sapiens	matrin 3(MATR3)
ENSG00000166441	RPL27A	Homo sapiens	ribosomal protein L27a(RPL27A)
ENSG00000143947	RPS27A	Homo sapiens	ribosomal protein S27a(RPS27A)
ENSG00000165119	HNRNPK	Homo sapiens	heterogeneous nuclear ribonucleoprotein K(HNRNPK)
ENSG00000167658	EEF2	Homo sapiens	eukaryotic translation elongation factor 2(EEF2)
ENSG00000277586	NEFL	Homo sapiens	neurofilament, light polypeptide(NEFL)
ENSG00000169714	CNBP	Homo sapiens	CCHC-type zinc finger nucleic acid binding protein(CNBP)
ENSG00000100097	LGALS1	Homo sapiens	galectin 1(LGALS1)
ENSG00000026025	VIM	Homo sapiens	vimentin(VIM)
ENSG00000143933	CALM2	Homo sapiens	calmodulin 2(CALM2)
ENSG00000084234	APLP2	Homo sapiens	amyloid beta precursor like protein 2(APLP2)
ENSG00000234745	HLA-B	Homo sapiens	major histocompatibility complex, class I, B(HLA-B)
ENSG00000130726	TRIM28	Homo sapiens	tripartite motif containing 28(TRIM28)
ENSG00000103034	NDRG4	Homo sapiens	NDRG family member 4(NDRG4)
ENSG00000105323	HNRNPUL1	Homo sapiens	heterogeneous nuclear ribonucleoprotein U like 1(HNRNPUL1)
ENSG00000131711	MAP1B	Homo sapiens	microtubule associated protein 1B(MAP1B)
ENSG00000130985	UBA1	Homo sapiens	ubiquitin like modifier activating enzyme 1(UBA1)
ENSG00000108953	YWHAE	Homo sapiens	tyrosine 3-monooxygenase/tryptophan 5-monooxygenase activation protein epsilon(YWHAE)
ENSG00000198034	RPS4X	Homo sapiens	ribosomal protein S4, X-linked(RPS4X)
ENSG00000105568	PPP2R1A	Homo sapiens	protein phosphatase 2 scaffold subunit Aalpha(PPP2R1A)
ENSG00000142949	PTPRF	Homo sapiens	protein tyrosine phosphatase, receptor type F(PTPRF)
ENSG00000115009	CCL20	Homo sapiens	C-C motif chemokine ligand 20(CCL20)
ENSG00000139318	DUSP6	Homo sapiens	dual specificity phosphatase 6(DUSP6)
ENSG00000136167	LCP1	Homo sapiens	lymphocyte cytosolic protein 1(LCP1)
ENSG00000167553	TUBA1C	Homo sapiens	tubulin alpha 1c(TUBA1C)
ENSG00000114391	RPL24	Homo sapiens	ribosomal protein L24(RPL24)
ENSG00000167552	TUBA1A	Homo sapiens	tubulin alpha 1a(TUBA1A)
ENSG00000258947	TUBB3	Homo sapiens	tubulin beta 3 class III(TUBB3)
ENSG00000277443	MARCKS	Homo sapiens	myristoylated alanine rich protein kinase C substrate(MARCKS)
ENSG00000019505	SYT13	Homo sapiens	synaptotagmin 13(SYT13)
ENSG00000128872	TMOD2	Homo sapiens	tropomodulin 2(TMOD2)
ENSG00000241697	TMEFF1	Homo sapiens	transmembrane protein with EGF like and two follistatin like domains 1(TMEFF1)
ENSG00000147274	RBMX	Homo sapiens	RNA binding motif protein, X-linked(RBMX)
ENSG00000142937	RPS8	Homo sapiens	ribosomal protein S8(RPS8)
ENSG00000104549	SQLE	Homo sapiens	squalene epoxidase(SQLE)
ENSG00000099783	HNRNPM	Homo sapiens	heterogeneous nuclear ribonucleoprotein M(HNRNPM)
ENSG00000067715	SYT1	Homo sapiens	synaptotagmin 1(SYT1)
ENSG00000115310	RTN4	Homo sapiens	reticulon 4(RTN4)
ENSG00000139644	TMBIM6	Homo sapiens	transmembrane BAX inhibitor motif containing 6(TMBIM6)
ENSG00000166598	MIR3652	Homo sapiens	microRNA 3652(MIR3652)
ENSG00000154917	RAB6B	Homo sapiens	RAB6B, member RAS oncogene family(RAB6B)
ENSG00000008294	SPAG9	Homo sapiens	sperm associated antigen 9(SPAG9)
ENSG00000054523	KIF1B	Homo sapiens	kinesin family member 1B(KIF1B)
ENSG00000175061	LRRC75A-AS1	Homo sapiens	LRRC75A antisense RNA 1(LRRC75A-AS1)
ENSG00000102003	SYP	Homo sapiens	synaptophysin(SYP)
ENSG00000126214	KLC1	Homo sapiens	kinesin light chain 1(KLC1)
ENSG00000053438	NNAT	Homo sapiens	neuronatin(NNAT)
ENSG00000254772	EEF1G	Homo sapiens	eukaryotic translation elongation factor 1 gamma(EEF1G)
ENSG00000176165	FOXG1	Homo sapiens	forkhead box G1(FOXG1)
ENSG00000130723	PRRC2B	Homo sapiens	proline rich coiled-coil 2B(PRRC2B)
ENSG00000147140	NONO	Homo sapiens	non-POU domain containing, octamer-binding(NONO)
ENSG00000067840	PDZD4	Homo sapiens	PDZ domain containing 4(PDZD4)
ENSG00000138326	RPS24	Homo sapiens	ribosomal protein S24(RPS24)
ENSG00000152977	ZIC1	Homo sapiens	Zic family member 1(ZIC1)
ENSG00000228253	ATP8	Homo sapiens	ATP synthase F0 subunit 8(ATP8)
ENSG00000115306	SPTBN1	Homo sapiens	spectrin beta, non-erythrocytic 1(SPTBN1)
ENSG00000075340	ADD2	Homo sapiens	adducin 2(ADD2)
ENSG00000104419	NDRG1	Homo sapiens	N-myc downstream regulated 1(NDRG1)
ENSG00000038382	TRIO	Homo sapiens	trio Rho guanine nucleotide exchange factor(TRIO)
ENSG00000096384	HSP90AB1	Homo sapiens	heat shock protein 90 alpha family class B member 1(HSP90AB1)
ENSG00000110092	CCND1	Homo sapiens	cyclin D1(CCND1)
ENSG00000169752	NRG4	Homo sapiens	neuregulin 4(NRG4)
ENSG00000221983	UBA52	Homo sapiens	ubiquitin A-52 residue ribosomal protein fusion product 1(UBA52)
ENSG00000157064	NMNAT2	Homo sapiens	nicotinamide nucleotide adenylyltransferase 2(NMNAT2)
ENSG00000105894	PTN	Homo sapiens	pleiotrophin(PTN)
ENSG00000117519	CNN3	Homo sapiens	calponin 3(CNN3)
ENSG00000115457	IGFBP2	Homo sapiens	insulin like growth factor binding protein 2(IGFBP2)
ENSG00000227051	C14orf132	Homo sapiens	chromosome 14 open reading frame 132(C14orf132)
ENSG00000117632	MIR3917	Homo sapiens	microRNA 3917(MIR3917)
ENSG00000229117	RPL41	Homo sapiens	ribosomal protein L41(RPL41)
ENSG00000128739	SNRPN	Homo sapiens	small nuclear ribonucleoprotein polypeptide N(SNRPN)
ENSG00000133083	DCLK1	Homo sapiens	doublecortin like kinase 1(DCLK1)
ENSG00000140988	RPS2	Homo sapiens	ribosomal protein S2(RPS2)
ENSG00000118816	CCNI	Homo sapiens	cyclin I(CCNI)
ENSG00000172809	RPL38	Homo sapiens	ribosomal protein L38(RPL38)
ENSG00000182985	CADM1	Homo sapiens	cell adhesion molecule 1(CADM1)
ENSG00000102265	TIMP1	Homo sapiens	TIMP metallopeptidase inhibitor 1(TIMP1)
ENSG00000277632	CCL3	Homo sapiens	C-C motif chemokine ligand 3(CCL3)
ENSG00000104435	STMN2	Homo sapiens	stathmin 2(STMN2)
ENSG00000138668	HNRNPD	Homo sapiens	heterogeneous nuclear ribonucleoprotein D(HNRNPD)
ENSG00000105409	ATP1A3	Homo sapiens	ATPase Na+/K+ transporting subunit alpha 3(ATP1A3)
ENSG00000179218	CALR	Homo sapiens	calreticulin(CALR)
ENSG00000117984	CTSD	Homo sapiens	cathepsin D(CTSD)
ENSG00000114353	GNAI2	Homo sapiens	G protein subunit alpha i2(GNAI2)
ENSG00000071082	RPL31	Homo sapiens	ribosomal protein L31(RPL31)
ENSG00000171603	CLSTN1	Homo sapiens	calsyntenin 1(CLSTN1)
ENSG00000113140	SPARC	Homo sapiens	secreted protein acidic and cysteine rich(SPARC)
ENSG00000135390	ATP5G2	Homo sapiens	ATP synthase, H+ transporting, mitochondrial Fo complex subunit C2 (subunit 9)(ATP5G2)
ENSG00000085117	CD82	Homo sapiens	CD82 molecule(CD82)
ENSG00000274012	RN7SL2	Homo sapiens	RNA, 7SL, cytoplasmic 2(RN7SL2)
ENSG00000137331	IER3	Homo sapiens	immediate early response 3(IER3)
ENSG00000213190	MLLT11	Homo sapiens	myeloid/lymphoid or mixed-lineage leukemia; translocated to, 11(MLLT11)
ENSG00000205336	ADGRG1	Homo sapiens	adhesion G protein-coupled receptor G1(ADGRG1)
ENSG00000188157	AGRN	Homo sapiens	agrin(AGRN)
ENSG00000105640	RPL18A	Homo sapiens	ribosomal protein L18a(RPL18A)
ENSG00000002834	LASP1	Homo sapiens	LIM and SH3 protein 1(LASP1)
ENSG00000116729	WLS	Homo sapiens	wntless Wnt ligand secretion mediator(WLS)
ENSG00000137309	HMGA1	Homo sapiens	high mobility group AT-hook 1(HMGA1)
ENSG00000179222	MAGED1	Homo sapiens	MAGE family member D1(MAGED1)
ENSG00000164091	WDR82	Homo sapiens	WD repeat domain 82(WDR82)
ENSG00000135486	HNRNPA1	Homo sapiens	heterogeneous nuclear ribonucleoprotein A1(HNRNPA1)
ENSG00000159335	PTMS	Homo sapiens	parathymosin(PTMS)
ENSG00000138758	SEPT11	Homo sapiens	septin 11(SEPT11)
ENSG00000171863	RPS7	Homo sapiens	ribosomal protein S7(RPS7)
ENSG00000171858	RPS21	Homo sapiens	ribosomal protein S21(RPS21)
ENSG00000170889	RPS9	Homo sapiens	ribosomal protein S9(RPS9)
ENSG00000007168	PAFAH1B1	Homo sapiens	platelet activating factor acetylhydrolase 1b regulatory subunit 1(PAFAH1B1)
ENSG00000171617	ENC1	Homo sapiens	ectodermal-neural cortex 1(ENC1)
ENSG00000189159	HN1	Homo sapiens	hematological and neurological expressed 1(HN1)
ENSG00000146386	ABRACL	Homo sapiens	ABRA C-terminal like(ABRACL)
ENSG00000123384	LRP1	Homo sapiens	LDL receptor related protein 1(LRP1)
ENSG00000169429	CXCL8	Homo sapiens	C-X-C motif chemokine ligand 8(CXCL8)
ENSG00000125691	RPL23	Homo sapiens	ribosomal protein L23(RPL23)
ENSG00000140945	CDH13	Homo sapiens	cadherin 13(CDH13)
ENSG00000168461	RAB31	Homo sapiens	RAB31, member RAS oncogene family(RAB31)
ENSG00000152932	RAB3C	Homo sapiens	RAB3C, member RAS oncogene family(RAB3C)
ENSG00000265972	TXNIP	Homo sapiens	thioredoxin interacting protein(TXNIP)
ENSG00000150991	UBC	Homo sapiens	ubiquitin C(UBC)
ENSG00000173812	EIF1	Homo sapiens	eukaryotic translation initiation factor 1(EIF1)
ENSG00000233927	RPS28	Homo sapiens	ribosomal protein S28(RPS28)
ENSG00000011600	TYROBP	Homo sapiens	TYRO protein tyrosine kinase binding protein(TYROBP)
ENSG00000030582	GRN	Homo sapiens	granulin precursor(GRN)
ENSG00000139970	RTN1	Homo sapiens	reticulon 1(RTN1)
ENSG00000150625	GPM6A	Homo sapiens	glycoprotein M6A(GPM6A)
ENSG00000231500	RPS18	Homo sapiens	ribosomal protein S18(RPS18)
ENSG00000166165	CKB	Homo sapiens	creatine kinase B(CKB)
ENSG00000063046	EIF4B	Homo sapiens	eukaryotic translation initiation factor 4B(EIF4B)
ENSG00000169439	SDC2	Homo sapiens	syndecan 2(SDC2)
ENSG00000148798	INA	Homo sapiens	internexin neuronal intermediate filament protein alpha(INA)
ENSG00000182899	RPL35A	Homo sapiens	ribosomal protein L35a(RPL35A)
ENSG00000104408	EIF3E	Homo sapiens	eukaryotic translation initiation factor 3 subunit E(EIF3E)
ENSG00000133048	CHI3L1	Homo sapiens	chitinase 3 like 1(CHI3L1)
ENSG00000116985	BMP8B	Homo sapiens	bone morphogenetic protein 8b(BMP8B)
ENSG00000116741	RGS2	Homo sapiens	regulator of G-protein signaling 2(RGS2)
ENSG00000080824	HSP90AA1	Homo sapiens	heat shock protein 90 alpha family class A member 1(HSP90AA1)
ENSG00000149639	SOGA1	Homo sapiens	suppressor of glucose, autophagy associated 1(SOGA1)
ENSG00000212907	ND4L	Homo sapiens	NADH dehydrogenase, subunit 4L (complex I)(ND4L)
ENSG00000102109	PCSK1N	Homo sapiens	proprotein convertase subtilisin/kexin type 1 inhibitor(PCSK1N)
ENSG00000169442	CD52	Homo sapiens	CD52 molecule(CD52)
ENSG00000102226	USP11	Homo sapiens	ubiquitin specific peptidase 11(USP11)
ENSG00000090621	PABPC4	Homo sapiens	poly(A) binding protein cytoplasmic 4(PABPC4)
ENSG00000100167	SEPT3	Homo sapiens	septin 3(SEPT3)
ENSG00000010404	IDS	Homo sapiens	iduronate 2-sulfatase(IDS)
ENSG00000127603	MACF1	Homo sapiens	microtubule-actin crosslinking factor 1(MACF1)
ENSG00000084070	SMAP2	Homo sapiens	small ArfGAP2(SMAP2)
ENSG00000148303	RPL7A	Homo sapiens	ribosomal protein L7a(RPL7A)
ENSG00000084073	ZMPSTE24	Homo sapiens	zinc metallopeptidase STE24(ZMPSTE24)
ENSG00000087460	GNAS	Homo sapiens	GNAS complex locus(GNAS)
ENSG00000182768	NGRN	Homo sapiens	neugrin, neurite outgrowth associated(NGRN)
ENSG00000171533	MAP6	Homo sapiens	microtubule associated protein 6(MAP6)
ENSG00000114554	plxna1	Homo sapiens	plexin A1(PLXNA1)
ENSG00000136689	IL1RN	Homo sapiens	interleukin 1 receptor antagonist(IL1RN)
ENSG00000116852	KIF21B	Homo sapiens	kinesin family member 21B(KIF21B)
ENSG00000110076	NRXN2	Homo sapiens	neurexin 2(NRXN2)
ENSG00000196924	FLNA	Homo sapiens	filamin A(FLNA)
ENSG00000170558	CDH2	Homo sapiens	cadherin 2(CDH2)
ENSG00000113580	NR3C1	Homo sapiens	nuclear receptor subfamily 3 group C member 1(NR3C1)
ENSG00000127616	SMARCA4	Homo sapiens	SWI/SNF related, matrix associated, actin dependent regulator of chromatin, subfamily a, member 4(SMARCA4)
ENSG00000054793	ATP9A	Homo sapiens	ATPase phospholipid transporting 9A (putative)(ATP9A)
ENSG00000161970	RPL26	Homo sapiens	ribosomal protein L26(RPL26)
ENSG00000179010	MRFAP1	Homo sapiens	Morf4 family associated protein 1(MRFAP1)
ENSG00000181449	SOX2	Homo sapiens	SRY-box 2(SOX2)
ENSG00000272398	CD24	Homo sapiens	CD24 molecule(CD24)

## Sheet: KEGG 2021 Human
Term	Overlap	P-value	Adjusted P-value	Old P-value	Old Adjusted P-value	Odds Ratio	Combined Score	Genes
Ribosome	68/158	1.73043e-63	4.32607e-61	0	0	29.8398	4312.29	RPL4;RPL5;RPL30;RPL3;RPL32;RPL31;RPL34;RPLP1;RPLP0;RPL10A;RPL9;RPL6;RPL7;RPS15;RPS4X;RPS14;RPL7A;RPS16;RPL18A;RPS19;RPS18;RPL36;RPL35;RPLP2;RPL38;RPL37;RPS11;RPL39;RPS13;RPS12;RPS9;RPL21;RPS7;RPS8;RPL23;RPS5;RPL22;RPS6;RPL13A;RPSA;RPS3A;RPL37A;RPL24;RPL27;RPL26;RPL29;UBA52;RPL10;RPL12;RPL11;RPL14;RPS3;RPL13;RPL15;RPS2;RPL18;RPS27A;RPL19;RPL41;RPL35A;RPS25;RPS28;RPS27;RPL27A;RPS20;FAU;RPS21;RPS24
Coronavirus disease	71/232	5.81958e-54	7.27447e-52	0	0	17.4596	2140.16	RPL4;RPL5;RPL30;RPL3;CXCL8;RPL32;RPL31;RPL34;RPLP1;RPLP0;RPL10A;RPL9;RPL6;RPL7;RPS15;RPS4X;RPS14;RPL7A;RPS16;RPL18A;RPS19;RPS18;RPL36;RPL35;RPLP2;RPL38;RPL37;RPS11;RPL39;RPS13;RPS12;RPS9;RPL21;RPS7;RPS8;RPL23;RPS5;RPL22;RPS6;RPL13A;RPSA;RPS3A;IL1B;RPL37A;RPL24;RPL27;RPL26;RPL29;UBA52;RPL10;RPL12;RPL11;RPL14;RPS3;RPL13;RPL15;RPS2;RPL18;RPS27A;RPL19;RPL41;RPL35A;NFKBIA;RPS25;RPS28;RPS27;RPL27A;RPS2…
Parkinson disease	38/249	1.17201e-17	9.76671e-16	0	0	6.66039	259.657	ND6;ATP8;ATP6;KLC1;UQCRH;GNAI2;TUBA1C;TUBA1B;UCHL1;TUBA1A;KIF5C;TUBB3;KIF5A;UBC;COX3;COX2;COX1;RPS27A;HSPA5;TUBB;ND4L;COX6C;TUBB2B;TUBB2A;GNAS;CALM3;ND1;UBA1;MAPT;CYTB;CALM1;ND3;UBA52;CALM2;ND2;ND5;ND4;SLC25A6
Pathways of neurodegeneration	48/475	1.22833e-14	7.67706e-13	0	0	4.19121	134.247	ND6;APP;ATP8;DCTN1;ATP6;KLC1;UQCRH;TUBA1C;TUBA1B;UCHL1;TUBA1A;TUBB3;KIF5C;KIF5A;UBC;COX3;COX2;NEFL;COX1;NEFM;RPS27A;PRPH;APC2;GPX1;HSPA5;FUS;TUBB;ND4L;COX6C;TUBB2B;TUBB2A;IL1B;CTNNB1;ND1;CALM3;UBA1;CYTB;MAPT;ND3;CALM1;UBA52;ND2;SQSTM1;CALM2;ND5;ND4;SLC25A6;CDK5R1
Amyotrophic lateral sclerosis	41/364	3.05893e-14	1.52947e-12	0	0	4.69414	146.073	ND6;ATP8;DCTN1;ATP6;KLC1;ACTB;UQCRH;ACTG1;TUBA1C;TUBA1B;TUBA1A;KIF5C;TUBB3;KIF5A;COX3;COX2;NEFL;COX1;NEFM;HNRNPA1;PRPH;GPX1;HSPA5;FUS;TUBB;ND4L;COX6C;TUBB2B;TUBB2A;NRG4;HNRNPA2B1;MATR3;ND1;CYTB;PFN1;ND3;ND2;SQSTM1;ND5;PFN2;ND4
Salmonella infection	32/249	6.11299e-13	2.54708e-11	0	0	5.38978	151.578	CXCL8;HSP90AB1;DCTN1;KLC1;ACTB;MYL12A;ACTG1;TUBA1C;TUBA1B;TUBA1A;KIF5C;TUBB3;KIF5A;RPS3;FLNA;CD14;S100A10;DYNC1H1;ACTR2;HSP90AA1;TUBB;DYNLL2;RHOA;NFKBIA;TUBB2B;TUBB2A;ARPC2;IL1B;CTNNB1;PFN1;GAPDH;PFN2
Alzheimer disease	39/369	1.01375e-12	3.62055e-11	0	0	4.35201	120.191	APP;ND6;RTN3;LRP1;ATP8;ATP6;KLC1;RTN4;UQCRH;TUBA1C;TUBA1B;TUBA1A;KIF5C;TUBB3;KIF5A;COX3;COX2;COX1;APC2;TUBB;ND4L;COX6C;TUBB2B;TUBB2A;IL1B;CTNNB1;CALM3;ND1;MAPT;CYTB;CALM1;ND3;CALM2;ND2;GAPDH;ND5;CDK5R1;ND4;SLC25A6
Huntington disease	32/306	1.52097e-10	4.75303e-09	0	0	4.25589	96.2108	ND6;ATP8;DCTN1;CLTC;ATP6;SLC1A3;KLC1;UQCRH;TUBA1C;TUBA1B;TUBA1A;KIF5C;TUBB3;KIF5A;COX3;COX2;COX1;AP2M1;GPX1;TUBB;ND4L;AP2B1;COX6C;TUBB2B;TUBB2A;ND1;CYTB;ND3;ND2;ND5;ND4;SLC25A6
Prion disease	30/273	1.71618e-10	4.76716e-09	0	0	4.4891	100.941	ND6;ATP8;ATP6;KLC1;UQCRH;TUBA1C;TUBA1B;TUBA1A;KIF5C;TUBB3;KIF5A;COX3;COX2;COX1;NCAM1;HSPA8;HSPA5;TUBB;ND4L;COX6C;TUBB2B;TUBB2A;IL1B;ND1;CYTB;ND3;ND2;ND5;ND4;SLC25A6
Pathogenic Escherichia coli infection	20/197	6.96883e-07	1.74221e-05	0	0	4.04616	57.361	ACTR2;CXCL8;TUBB;MYO5A;ACTB;RHOA;ACTG1;NFKBIA;TUBA1C;TUBA1B;TUBB2B;TUBA1A;TUBB2A;ARPC2;TUBB3;IL1B;NCL;RPS3;TMBIM6;GAPDH
Thermogenesis	21/232	2.40417e-06	5.46401e-05	0	0	3.56422	46.115	ND6;ATP8;RPS6;ATP6;BMP8B;ND4L;COX6C;ACTB;UQCRH;SMARCA4;ACTG1;COX3;GNAS;COX2;COX1;ND1;CYTB;ND3;ND2;ND5;ND4
Diabetic cardiomyopathy	19/203	4.43227e-06	9.04015e-05	0	0	3.68942	45.478	ND6;ATP8;ATP6;ND4L;COX6C;MMP9;UQCRH;COX3;COX2;COX1;ND1;CYTB;ND3;CTSD;ND2;GAPDH;ND5;ND4;SLC25A6
Oxidative phosphorylation	15/133	4.70088e-06	9.04015e-05	0	0	4.52383	55.4973	ND6;ATP8;ATP6;ND4L;COX6C;UQCRH;COX3;COX2;ND1;COX1;CYTB;ND3;ND2;ND5;ND4
Human cytomegalovirus infection	20/225	5.48196e-06	9.37991e-05	0	0	3.48844	42.2591	CDKN1A;CXCL8;HLA-B;HLA-A;RHOA;GNAI2;GNAO1;NFKBIA;GNG2;CCND1;IL1B;GNB1;GNAS;CCL3;CTNNB1;CALM3;CALR;CALM1;B2M;CALM2
Phagosome	16/152	5.62795e-06	9.37991e-05	0	0	4.19058	50.6547	DYNC1H1;TUBB;ITGB2;HLA-B;HLA-A;ACTB;ACTG1;TUBA1C;TUBA1B;TUBB2B;TUBA1A;TUBB2A;TUBB3;CANX;CD14;CALR
Fluid shear stress and atherosclerosis	15/139	8.10899e-06	0.000126703	0	0	4.3036	50.4491	MEF2C;HSP90AA1;HSP90AB1;SDC2;GSTP1;MMP9;ACTB;RHOA;ACTG1;IL1B;CTNNB1;CALM3;CALM1;SQSTM1;CALM2
Cell adhesion molecules	15/148	1.73479e-05	0.000255117	0	0	4.01051	43.9634	CADM3;CADM1;SDC2;SDC3;ITGB2;HLA-B;NRXN2;HLA-A;L1CAM;PTPRF;VCAN;ALCAM;CDH2;NCAM1;LRRC4B
Legionellosis	9/57	2.61947e-05	0.000363815	0	0	6.62363	69.879	EEF1A1;EEF1G;NFKBIA;HSPA8;CXCL8;IL1B;ITGB2;EEF1A2;CD14
Oxytocin signaling pathway	15/154	2.78271e-05	0.000366146	0	0	3.8362	40.2398	MEF2C;CDKN1A;EEF2;ACTB;RHOA;ACTG1;GNAI2;GNAO1;RGS2;MYL6;CCND1;GNAS;CALM3;CALM1;CALM2
Pertussis	10/76	4.81493e-05	0.000601866	0	0	5.35722	53.2572	CXCL8;IL1B;ITGB2;CFL1;CALM3;CD14;CALM1;CALM2;RHOA;GNAI2
Hippo signaling pathway	15/163	5.39797e-05	0.000642615	0	0	3.60124	35.389	YWHAE;APC2;YWHAB;ITGB2;BMP8B;YWHAZ;ACTB;ACTG1;SOX2;CCND1;YWHAQ;PPP2R1A;CTNNB1;YWHAG;YWHAH
Antigen processing and presentation	10/78	6.03895e-05	0.000686244	0	0	5.19912	50.5079	HSPA8;HSP90AA1;HSP90AB1;HSPA5;CANX;HLA-B;HLA-A;CALR;B2M;CTSB
Steroid biosynthesis	5/20	0.000181827	0.00197638	0	0	11.7101	100.852	SQLE;DHCR24;MSMO1;LSS;FDFT1
Viral carcinogenesis	16/203	0.000193271	0.00200512	0	0	3.03964	25.9933	YWHAE;CDKN1A;YWHAB;HLA-B;CHD4;ACTN4;HLA-A;YWHAZ;RHOA;NFKBIA;HNRNPK;PKM;CCND1;YWHAQ;YWHAG;YWHAH
Shigellosis	18/246	0.000200512	0.00200512	0	0	2.80906	23.9182	ACTR2;CXCL8;ACTN4;FNBP1L;ACTB;MYL12A;RHOA;ACTG1;NFKBIA;ARPC2;IL1B;UBC;CD14;PFN1;RPS27A;UBA52;SQSTM1;PFN2
Proteoglycans in cancer	16/205	0.000216166	0.00207852	0	0	3.00717	25.3789	CD63;CDKN1A;SDC2;RPS6;PLAUR;MSN;ANK2;HSPG2;MMP9;ACTB;RHOA;ACTG1;CCND1;FLNA;CTNNB1;EIF4B
Tight junction	14/169	0.000287568	0.00266266	0	0	3.2023	26.1117	ACTR2;MSN;ACTN4;ACTB;MYL12A;RHOA;ACTG1;TUBA1C;MYL6;TUBA1B;TUBA1A;CCND1;ARPC2;PPP2R1A
Leukocyte transendothelial migration	11/114	0.000347646	0.00304028	0	0	3.77574	30.0712	ITGB2;MSN;CTNNB1;ACTN4;MMP9;ACTB;ARHGAP35;MYL12A;RHOA;ACTG1;GNAI2
Kaposi sarcoma-associated herpesvirus infection	15/193	0.000352672	0.00304028	0	0	2.98963	23.7675	CDKN1A;CXCL8;HLA-B;HLA-A;NFKBIA;GNG2;CCND1;UBC;GNB1;CTNNB1;CALM3;CALM1;RPS27A;UBA52;CALM2
Regulation of actin cytoskeleton	16/218	0.000430693	0.00358911	0	0	2.81174	21.7913	APC2;ACTR2;ITGB2;MSN;ACTN4;ACTB;MYL12A;RHOA;ARHGAP35;ACTG1;ARPC2;TMSB4X;CFL1;PIP4K2B;PFN1;PFN2
Hepatitis C	13/157	0.000470962	0.00379808	0	0	3.19666	24.4888	YWHAE;CDKN1A;CD81;YWHAB;YWHAZ;NFKBIA;CCND1;YWHAQ;PPP2R1A;CTNNB1;EIF3E;YWHAG;YWHAH
Gap junction	9/88	0.000775191	0.00605618	0	0	4.01805	28.7789	TUBA1C;TUBA1B;TUBB2B;TUBA1A;TUBB2A;TUBB3;TUBB;GNAS;GNAI2
PI3K-Akt signaling pathway	21/354	0.00102721	0.00778186	0	0	2.24408	15.4413	YWHAE;NTRK2;CDKN1A;HSP90AA1;HSP90AB1;YWHAB;RPS6;TNC;LAMB1;YWHAZ;GNG2;CCND1;YWHAQ;PPP2R1A;GNB1;COL6A1;SPP1;YWHAG;EIF4B;MCL1;YWHAH
Dopaminergic synapse	11/132	0.00119444	0.00878266	0	0	3.21107	21.6107	GNAO1;GNG2;KIF5C;PPP2R1A;KIF5A;GNB1;GNAS;CALM3;CALM1;CALM2;GNAI2
Gastric acid secretion	8/76	0.00124526	0.0088947	0	0	4.14417	27.7179	GNAS;ATP1A3;CALM3;CALM1;CALM2;ACTB;ACTG1;GNAI2
Vasopressin-regulated water reabsorption	6/44	0.00131636	0.0091414	0	0	5.55034	36.8148	DYNC1H1;DCTN1;ARHGDIB;GNAS;DYNLL2;VAMP2
Viral myocarditis	7/60	0.00136092	0.00919537	0	0	4.64757	30.6721	CCND1;ITGB2;HLA-B;HLA-A;ACTB;EIF4G2;ACTG1
Cellular senescence	12/156	0.00145988	0.00960445	0	0	2.94536	19.2314	CDKN1A;CXCL8;CCND1;IGFBP3;HLA-B;CALM3;HLA-A;CALM1;SQSTM1;CALM2;ZFP36L1;SLC25A6
Estrogen signaling pathway	11/137	0.00161371	0.0103443	0	0	3.08285	19.8203	GNAO1;HSPA8;HSP90AA1;HSP90AB1;GNAS;CALM3;CALM1;CALM2;CTSD;MMP9;GNAI2
Neurotrophin signaling pathway	10/119	0.0018495	0.0115594	0	0	3.23662	20.3676	NFKBIA;YWHAE;NTRK2;MAGED1;KIDINS220;ARHGDIB;CALM3;CALM1;CALM2;RHOA
Chagas disease	9/102	0.00220637	0.0134535	0	0	3.41072	20.8613	GNAO1;NFKBIA;CXCL8;PPP2R1A;IL1B;GNAS;CCL3;CALR;GNAI2
Rap1 signaling pathway	14/210	0.00238814	0.0142151	0	0	2.52705	15.2564	ITGB2;ACTB;RHOA;GNAI2;ACTG1;GNAO1;GNAS;CTNNB1;CALM3;EVL;PFN1;CALM1;CALM2;PFN2
Malaria	6/50	0.0025744	0.0147339	0	0	4.792	28.5705	CXCL8;LRP1;CD81;IL1B;SDC2;ITGB2
Glycolysis / Gluconeogenesis	7/67	0.00259317	0.0147339	0	0	4.10387	24.438	LDHB;TPI1;PKM;ENO1;ENO2;ALDOA;GAPDH
Lipid and atherosclerosis	14/215	0.00295882	0.0161139	0	0	2.46355	14.3451	HSPA8;HSP90AA1;CXCL8;HSP90AB1;HSPA5;MMP9;RHOA;NFKBIA;IL1B;CCL3;CALM3;CD14;CALM1;CALM2
Retrograde endocannabinoid signaling	11/148	0.00296496	0.0161139	0	0	2.8337	16.4947	GNAO1;ND6;GNG2;GNB1;ND1;ND4L;ND3;ND2;ND5;ND4;GNAI2
Oocyte meiosis	10/129	0.00334257	0.0177796	0	0	2.9631	16.8927	YWHAE;YWHAQ;PPP2R1A;YWHAB;CALM3;CALM1;CALM2;YWHAZ;YWHAG;YWHAH
Endocrine and other factor-regulated calcium reabsorption	6/53	0.00346729	0.0180588	0	0	4.48543	25.4072	CLTC;GNAS;ATP1A3;AP2B1;ATP2B1;AP2M1
Focal adhesion	13/201	0.00434684	0.0221777	0	0	2.44292	13.2854	TNC;LAMB1;ACTN4;ACTB;MYL12A;RHOA;ARHGAP35;ACTG1;CCND1;COL6A1;SPP1;FLNA;CTNNB1
PPAR signaling pathway	7/74	0.00454337	0.0227169	0	0	3.67378	19.8167	FADS2;HMGCS1;SCD;FABP7;UBC;DBI;PLIN2
IL-17 signaling pathway	8/94	0.00476094	0.023338	0	0	3.27374	17.5057	NFKBIA;HSP90AA1;CXCL8;HSP90AB1;JUND;CCL20;IL1B;MMP9
Apelin signaling pathway	10/137	0.00512217	0.0246258	0	0	2.7753	14.6374	MEF2C;GNG2;CCND1;RPS6;GNB1;SPP1;CALM3;CALM1;CALM2;GNAI2
Bacterial invasion of epithelial cells	7/77	0.00565442	0.0261417	0	0	3.51579	18.1953	ACTR2;ARPC2;CLTC;CTNNB1;ACTB;RHOA;ACTG1
Circadian entrainment	8/97	0.00575118	0.0261417	0	0	3.1629	16.3153	GNAO1;GNG2;GNB1;GNAS;CALM3;CALM1;CALM2;GNAI2
Prostate cancer	8/97	0.00575118	0.0261417	0	0	3.1629	16.3153	NFKBIA;CDKN1A;HSP90AA1;HSP90AB1;CCND1;GSTP1;CTNNB1;MMP9
Synaptic vesicle cycle	7/78	0.00606645	0.0270824	0	0	3.46609	17.6943	SYT1;STXBP1;CLTC;SLC1A3;AP2B1;AP2M1;VAMP2
Apoptosis	10/142	0.00656503	0.028794	0	0	2.66949	13.4168	NFKBIA;TUBA1C;TUBA1B;TUBA1A;CTSD;SPTAN1;ACTB;ACTG1;MCL1;CTSB
Human immunodeficiency virus 1 infection	13/212	0.00674468	0.0290719	0	0	2.30657	11.5305	HLA-B;HLA-A;GNAI2;GNAO1;NFKBIA;GNG2;CFL1;GNB1;CALM3;CALR;CALM1;B2M;CALM2
Phototransduction	4/28	0.00721131	0.0305564	0	0	5.84176	28.8122	GNB1;CALM3;CALM1;CALM2
Amoebiasis	8/102	0.00774039	0.0322516	0	0	2.99389	14.5542	CXCL8;PRDX1;IL1B;ITGB2;GNAS;LAMB1;ACTN4;CD14
Parathyroid hormone synthesis, secretion and action	8/106	0.00967258	0.0393696	0	0	2.87109	13.3175	MEF2C;CDKN1A;MMP14;JUND;NACA;GNAS;RHOA;GNAI2
Lysosome	9/128	0.00976367	0.0393696	0	0	2.66194	12.3223	CD164;CD63;PSAP;CLTC;PPT1;LAPTM5;IDS;CTSD;CTSB
Cardiac muscle contraction	7/87	0.0108471	0.043044	0	0	3.07473	13.9096	COX3;ATP1A3;COX2;COX1;CYTB;COX6C;UQCRH
HIF-1 signaling pathway	8/109	0.0113416	0.0437337	0	0	2.78538	12.4765	LDHB;CDKN1A;RPS6;ENO1;TIMP1;ENO2;ALDOA;GAPDH
ECM-receptor interaction	7/88	0.01151	0.0437337	0	0	3.03661	13.5571	SV2A;COL6A1;TNC;SPP1;LAMB1;AGRN;HSPG2
Endocytosis	14/252	0.0115457	0.0437337	0	0	2.07656	9.26444	HSPA8;ACTR2;CLTC;HLA-B;HLA-A;AP2B1;RHOA;ACAP3;RAB31;ARPC2;KIF5C;KIF5A;SMAP2;AP2M1
Renin secretion	6/69	0.0124813	0.046572	0	0	3.34351	14.6564	GNAS;CALM3;CALM1;CALM2;CTSB;GNAI2
Adherens junction	6/71	0.0142379	0.0523452	0	0	3.2403	13.7773	CTNNB1;ACTN4;ACTB;PTPRF;RHOA;ACTG1
Glutamatergic synapse	8/114	0.0145817	0.0528323	0	0	2.65331	11.2182	GNAO1;SLC38A1;GNG2;GNB1;GNAS;GRIK3;SLC1A3;GNAI2
Salivary secretion	7/93	0.0152699	0.0545352	0	0	2.85933	11.9573	GNAS;ATP1A3;CALM3;ATP2B1;CALM1;CALM2;VAMP2
Thyroid hormone synthesis	6/75	0.0182534	0.0642727	0	0	3.05183	12.2177	GPX1;TTR;HSPA5;CANX;GNAS;ATP1A3
cGMP-PKG signaling pathway	10/167	0.0189906	0.0659396	0	0	2.2415	8.8849	RGS2;MEF2C;ATP1A3;CALM3;ATP2B1;CALM1;CALM2;RHOA;SLC25A6;GNAI2
Leishmaniasis	6/77	0.0205256	0.0702933	0	0	2.96555	11.5244	EEF1A1;NFKBIA;MARCKSL1;IL1B;ITGB2;EEF1A2
Terpenoid backbone biosynthesis	3/22	0.0224242	0.0746633	0	0	5.52575	20.9847	HMGCS1;HMGCR;ZMPSTE24
Melanogenesis	7/101	0.0229815	0.0746633	0	0	2.6149	9.86618	GNAO1;GNAS;CTNNB1;CALM3;CALM1;CALM2;GNAI2
Cell cycle	8/124	0.0229963	0.0746633	0	0	2.42332	9.1418	YWHAE;CDKN1A;CCND1;YWHAQ;YWHAB;YWHAZ;YWHAG;YWHAH
Platelet activation	8/124	0.0229963	0.0746633	0	0	2.42332	9.1418	FCER1G;GNAS;ACTB;ARHGAP35;MYL12A;RHOA;ACTG1;GNAI2
C-type lectin receptor signaling pathway	7/104	0.0264626	0.0848159	0	0	2.53363	9.20221	NFKBIA;FCER1G;IL1B;CALM3;CALM1;CALM2;RHOA
Bladder cancer	4/41	0.0268826	0.0850714	0	0	3.78671	13.6938	CDKN1A;CXCL8;CCND1;MMP9
Type I diabetes mellitus	4/43	0.0313765	0.0980516	0	0	3.59215	12.4349	IL1B;HLA-B;CPE;HLA-A
Necroptosis	9/159	0.0345634	0.106677	0	0	2.10842	7.09473	HSP90AA1;HSP90AB1;FTH1;IL1B;HMGB1;PPIA;SQSTM1;FTL;SLC25A6
Alcoholism	10/186	0.0362652	0.110565	0	0	1.99755	6.62568	GNAO1;NTRK2;GNG2;PKIA;GNB1;GNAS;CALM3;CALM1;CALM2;GNAI2
Yersinia infection	8/137	0.0383919	0.115638	0	0	2.17765	7.09893	NFKBIA;ACTR2;CXCL8;ARPC2;IL1B;ACTB;RHOA;ACTG1
Human T-cell leukemia virus 1 infection	11/219	0.0439865	0.130912	0	0	1.85957	5.80905	NFKBIA;CDKN1A;CCND1;CANX;ITGB2;HLA-B;HLA-A;CALR;B2M;RAN;SLC25A6
Aldosterone synthesis and secretion	6/98	0.0564158	0.165929	0	0	2.28615	6.5727	GNAS;ATP1A3;CALM3;ATP2B1;CALM1;CALM2
Glioma	5/75	0.0583705	0.169064	0	0	2.5022	7.1086	CDKN1A;CCND1;CALM3;CALM1;CALM2
Adrenergic signaling in cardiomyocytes	8/150	0.0595106	0.169064	0	0	1.97695	5.57817	PPP2R1A;GNAS;ATP1A3;CALM3;ATP2B1;CALM1;CALM2;GNAI2
Spliceosome	8/150	0.0595106	0.169064	0	0	1.97695	5.57817	HSPA8;HNRNPM;HNRNPK;FUS;HNRNPU;HNRNPC;HNRNPA1;RBMX
Tuberculosis	9/180	0.0658763	0.185046	0	0	1.84747	5.02508	FCER1G;IL1B;ITGB2;CALM3;CD14;CALM1;CALM2;CTSD;RHOA
NOD-like receptor signaling pathway	9/181	0.0677046	0.188068	0	0	1.83664	4.94533	NFKBIA;YWHAE;HSP90AA1;CXCL8;HSP90AB1;IL1B;TXNIP;RHOA;CTSB
Non-alcoholic fatty liver disease	8/155	0.0692598	0.189555	0	0	1.90921	5.09739	CXCL8;IL1B;COX3;COX2;COX1;CYTB;COX6C;UQCRH
Relaxin signaling pathway	7/129	0.0697563	0.189555	0	0	2.01184	5.35703	GNAO1;NFKBIA;GNG2;GNB1;GNAS;MMP9;GNAI2
Toll-like receptor signaling pathway	6/104	0.071011	0.19089	0	0	2.14552	5.67473	NFKBIA;CXCL8;IL1B;CCL3;SPP1;CD14
RNA transport	9/186	0.0773201	0.205639	0	0	1.78429	4.56743	EEF1A1;FUS;PABPC4;EEF1A2;EIF3E;EIF4G2;EIF4B;RAN;EIF1
Endometrial cancer	4/58	0.0783027	0.20586	0	0	2.59233	6.6031	APC2;CDKN1A;CCND1;CTNNB1
Glucagon signaling pathway	6/107	0.0790502	0.20586	0	0	2.08147	5.28208	LDHB;PKM;GNAS;CALM3;CALM1;CALM2
Human papillomavirus infection	14/331	0.0816061	0.210325	0	0	1.55264	3.89069	APC2;CDKN1A;HLA-B;TNC;CHD4;LAMB1;HLA-A;PKM;CCND1;PPP2R1A;COL6A1;SPP1;GNAS;CTNNB1
Thyroid cancer	3/37	0.083534	0.213097	0	0	3.08553	7.65984	CDKN1A;CCND1;CTNNB1
Hepatitis B	8/162	0.084461	0.213285	0	0	1.82177	4.50244	NFKBIA;CDKN1A;CXCL8;YWHAQ;YWHAB;HSPG2;MMP9;YWHAZ
Long-term depression	4/60	0.0862723	0.213545	0	0	2.49948	6.12435	GNAO1;PPP2R1A;GNAS;GNAI2
Mineral absorption	4/60	0.0862723	0.213545	0	0	2.49948	6.12435	FTH1;ATP1A3;ATP2B1;FTL
Chemokine signaling pathway	9/192	0.0899065	0.220359	0	0	1.72525	4.15611	NFKBIA;CXCL8;GNG2;CCL20;GNB1;CCL3;CXCL13;RHOA;GNAI2
Colorectal cancer	5/86	0.0925018	0.224519	0	0	2.16116	5.14471	APC2;CDKN1A;CCND1;CTNNB1;RHOA
Serotonergic synapse	6/113	0.0965915	0.232191	0	0	1.96414	4.59072	GNAO1;APP;GNG2;GNB1;GNAS;GNAI2
Hepatocellular carcinoma	8/168	0.0989303	0.235548	0	0	1.75291	4.05507	APC2;CDKN1A;CCND1;GSTP1;CTNNB1;ACTB;ACTG1;SMARCA4
GABAergic synapse	5/89	0.103265	0.24355	0	0	2.08366	4.73085	GNAO1;SLC38A1;GNG2;GNB1;GNAI2
Ferroptosis	3/41	0.105832	0.247272	0	0	2.76017	6.19907	FTH1;SAT1;FTL
Morphine addiction	5/91	0.11077	0.256276	0	0	2.03499	4.47758	GNAO1;GNG2;GNB1;GNAS;GNAI2
Graft-versus-host disease	3/42	0.111736	0.256276	0	0	2.68926	5.89381	IL1B;HLA-B;HLA-A
GnRH signaling pathway	5/93	0.118532	0.266623	0	0	1.98853	4.2407	MMP14;GNAS;CALM3;CALM1;CALM2
Rheumatoid arthritis	5/93	0.118532	0.266623	0	0	1.98853	4.2407	CXCL8;CCL20;IL1B;ITGB2;CCL3
AMPK signaling pathway	6/120	0.119447	0.266623	0	0	1.84287	3.91588	CCND1;PPP2R1A;SCD;FASN;HMGCR;EEF2
Mitophagy	4/68	0.121799	0.269467	0	0	2.18615	4.60267	UBC;RPS27A;SQSTM1;UBA52
Amphetamine addiction	4/69	0.126623	0.277682	0	0	2.1524	4.44802	GNAS;CALM3;CALM1;CALM2
Fc gamma R-mediated phagocytosis	5/97	0.134794	0.29303	0	0	1.90168	3.81099	ACTR2;MARCKSL1;MARCKS;ARPC2;CFL1
Axon guidance	8/182	0.137717	0.296803	0	0	1.6107	3.1933	DPYSL5;DPYSL2;CFL1;PLXNA1;L1CAM;MYL12A;RHOA;GNAI2
Inflammatory mediator regulation of TRP channels	5/98	0.139008	0.297025	0	0	1.88114	3.71191	IL1B;GNAS;CALM3;CALM1;CALM2
Non-small cell lung cancer	4/72	0.141562	0.299919	0	0	2.05712	4.02171	CDKN1A;CCND1;KIF5C;KIF5A
Osteoclast differentiation	6/127	0.144727	0.304048	0	0	1.73563	3.3548	NFKBIA;TYROBP;JUND;IL1B;TREM2;SQSTM1
p53 signaling pathway	4/73	0.146691	0.305605	0	0	2.02721	3.89108	CDKN1A;CD82;CCND1;IGFBP3
cAMP signaling pathway	9/216	0.151438	0.312888	0	0	1.52332	2.87539	NFKBIA;GNAS;ATP1A3;CALM3;ATP2B1;CALM1;CALM2;RHOA;GNAI2
Cocaine addiction	3/49	0.156245	0.320175	0	0	2.2792	4.23094	GNAS;GNAI2;CDK5R1
MicroRNAs in cancer	12/310	0.159686	0.324565	0	0	1.4119	2.5902	APC2;CDKN1A;MARCKS;HNRNPK;CCND1;TNC;FSCN1;VIM;MMP9;SOX4;RHOA;MCL1
Pathways in cancer	19/531	0.161673	0.325954	0	0	1.3033	2.37485	APC2;CDKN1A;HSP90AA1;HSP90AB1;CXCL8;GSTP1;LAMB1;MMP9;RHOA;GNAI2;NFKBIA;GNG2;CCND1;GNB1;GNAS;CTNNB1;CALM3;CALM1;CALM2
Vibrio cholerae infection	3/50	0.163002	0.326005	0	0	2.23059	4.04627	GNAS;ACTB;ACTG1
Arrhythmogenic right ventricular cardiomyopathy	4/77	0.167895	0.330968	0	0	1.91573	3.41846	CDH2;CTNNB1;ACTB;ACTG1
Vascular smooth muscle contraction	6/133	0.168168	0.330968	0	0	1.65312	2.94716	MYL6;GNAS;CALM3;CALM1;CALM2;RHOA
Transcriptional misregulation in cancer	8/192	0.169456	0.330968	0	0	1.52237	2.70246	MEF2C;CDKN1A;CXCL8;FUS;IGFBP3;CD14;MMP9;DUSP6
Biosynthesis of unsaturated fatty acids	2/27	0.173183	0.335626	0	0	2.79381	4.89869	FADS2;SCD
RNA degradation	4/79	0.178882	0.344004	0	0	1.86445	3.20878	BTG1;PABPC4;ENO1;ENO2
Insulin signaling pathway	6/137	0.184624	0.352335	0	0	1.60231	2.707	FASN;RPS6;CALM3;CALM1;CALM2;PTPRF
Measles	6/139	0.193081	0.365683	0	0	1.57805	2.59533	NFKBIA;HSPA8;CCND1;IL1B;RACK1;MSN
Protein processing in endoplasmic reticulum	7/171	0.201948	0.372587	0	0	1.49336	2.389	DNAJA1;HSPA8;HSP90AA1;HSP90AB1;HSPA5;CANX;CALR
TNF signaling pathway	5/112	0.203488	0.372587	0	0	1.63382	2.60129	NFKBIA;MMP14;CCL20;IL1B;MMP9
Toxoplasmosis	5/112	0.203488	0.372587	0	0	1.63382	2.60129	GNAO1;NFKBIA;HSPA8;LAMB1;GNAI2
Pentose phosphate pathway	2/30	0.203641	0.372587	0	0	2.49409	3.96909	ALDOA;TKT
Epstein-Barr virus infection	8/202	0.204178	0.372587	0	0	1.44315	2.29282	NFKBIA;CDKN1A;CCND1;HLA-B;HLA-A;CALR;VIM;B2M
Influenza A	7/172	0.205878	0.372968	0	0	1.48423	2.34579	NFKBIA;CXCL8;HNRNPUL1;IL1B;ACTB;ACTG1;SLC25A6
Glutathione metabolism	3/57	0.212448	0.382101	0	0	1.94074	3.00632	GPX1;GSTP1;PRDX6
Fructose and mannose metabolism	2/33	0.234626	0.418974	0	0	2.25238	3.26542	TPI1;ALDOA
Sphingolipid signaling pathway	5/119	0.238902	0.423584	0	0	1.53295	2.19472	FCER1G;PPP2R1A;CTSD;RHOA;GNAI2
Synthesis and degradation of ketone bodies	1/10	0.246503	0.433984	0	0	3.87652	5.42861	HMGCS1
Thyroid hormone signaling pathway	5/121	0.249319	0.435872	0	0	1.50636	2.09237	CCND1;ATP1A3;CTNNB1;ACTB;ACTG1
Small cell lung cancer	4/92	0.255207	0.443068	0	0	1.58796	2.16864	NFKBIA;CDKN1A;CCND1;LAMB1
Basal cell carcinoma	3/63	0.257024	0.443145	0	0	1.74613	2.37226	APC2;CDKN1A;CTNNB1
Cushing syndrome	6/155	0.265335	0.454341	0	0	1.40743	1.86732	APC2;CDKN1A;CCND1;GNAS;CTNNB1;GNAI2
TGF-beta signaling pathway	4/94	0.267521	0.454968	0	0	1.55251	2.04707	PPP2R1A;BMP8B;INHBA;RHOA
Phosphatidylinositol signaling system	4/97	0.286181	0.475834	0	0	1.50219	1.87944	PIP4K2B;CALM3;CALM1;CALM2
Allograft rejection	2/38	0.286677	0.475834	0	0	1.93905	2.42265	HLA-B;HLA-A
Acute myeloid leukemia	3/67	0.287404	0.475834	0	0	1.63666	2.04069	CCND1;CD14;DUSP6
Long-term potentiation	3/67	0.287404	0.475834	0	0	1.63666	2.04069	CALM3;CALM1;CALM2
mRNA surveillance pathway	4/98	0.292444	0.480994	0	0	1.48614	1.82718	PPP2R1A;WDR82;FUS;PABPC4
Natural killer cell mediated cytotoxicity	5/131	0.30289	0.493365	0	0	1.38609	1.65553	TYROBP;FCER1G;ITGB2;HLA-B;HLA-A
Viral protein interaction with cytokine and cytokine receptor	4/100	0.305021	0.493365	0	0	1.45502	1.72766	CXCL8;CCL20;CCL3;CXCL13
MAPK signaling pathway	10/294	0.306569	0.493365	0	0	1.23098	1.4554	HSPA8;NTRK2;MEF2C;JUND;IL1B;FLNA;CD14;MAPT;DUSP6;MAP4K4
Non-homologous end-joining	1/13	0.30786	0.493365	0	0	2.90694	3.4247	XRCC5
Epithelial cell signaling in Helicobacter pylori infection	3/70	0.310368	0.494216	0	0	1.56313	1.82886	NFKBIA;CXCL8;PTPRZ1
Pancreatic secretion	4/102	0.317655	0.502618	0	0	1.42518	1.63438	GNAS;ATP1A3;ATP2B1;RHOA
NF-kappa B signaling pathway	4/104	0.330329	0.519385	0	0	1.39653	1.54689	NFKBIA;CXCL8;IL1B;CD14
Th17 cell differentiation	4/107	0.349385	0.545914	0	0	1.35565	1.42557	NFKBIA;HSP90AA1;HSP90AB1;IL1B
Chronic myeloid leukemia	3/76	0.356367	0.553365	0	0	1.43421	1.47981	NFKBIA;CDKN1A;CCND1
Pyruvate metabolism	2/47	0.378842	0.584632	0	0	1.55052	1.50499	LDHB;PKM
Cholinergic synapse	4/113	0.387486	0.594304	0	0	1.28063	1.21413	GNAO1;GNG2;GNB1;GNAI2
Ether lipid metabolism	2/49	0.398706	0.604907	0	0	1.48439	1.36494	PLD3;PAFAH1B1
Fatty acid biosynthesis	1/18	0.399239	0.604907	0	0	2.05143	1.88362	FASN
Arginine and proline metabolism	2/50	0.408527	0.615252	0	0	1.45339	1.30107	CKB;SAT1
Glycosaminoglycan degradation	1/19	0.416015	0.622777	0	0	1.93736	1.69913	IDS
Complement and coagulation cascades	3/85	0.424395	0.631541	0	0	1.2762	1.09382	ITGB2;PLAUR;A2M
Insulin secretion	3/86	0.431817	0.638783	0	0	1.26076	1.05873	GNAS;ATP1A3;VAMP2
Autoimmune thyroid disease	2/53	0.437504	0.643388	0	0	1.36768	1.13062	HLA-B;HLA-A
Cytokine-cytokine receptor interaction	9/295	0.440249	0.64364	0	0	1.09802	0.900828	IL1RN;CXCL8;CCL20;GDF15;IL1B;CCL3;BMP8B;INHBA;CXCL13
Regulation of lipolysis in adipocytes	2/55	0.456388	0.663354	0	0	1.31594	1.03224	GNAS;GNAI2
Bile secretion	3/90	0.461135	0.66638	0	0	1.20255	0.930848	GNAS;ATP1A3;HMGCR
Ras signaling pathway	7/232	0.470655	0.676229	0	0	1.08505	0.817726	NTRK2;GNG2;GNB1;CALM3;CALM1;CALM2;RHOA
Protein export	1/23	0.478572	0.67979	0	0	1.58479	1.16791	HSPA5
Proximal tubule bicarbonate reclamation	1/23	0.478572	0.67979	0	0	1.58479	1.16791	ATP1A3
Dilated cardiomyopathy	3/96	0.503824	0.708512	0	0	1.12461	0.770955	GNAS;ACTB;ACTG1
Calcium signaling pathway	7/240	0.50624	0.708512	0	0	1.04736	0.712984	NTRK2;GNAS;CALM3;ATP2B1;CALM1;CALM2;SLC25A6
alpha-Linolenic acid metabolism	1/25	0.507295	0.708512	0	0	1.45257	0.985807	FADS2
Hematopoietic cell lineage	3/99	0.524507	0.722214	0	0	1.0893	0.702923	IL1B;CD14;CD24
Cytosolic DNA-sensing pathway	2/63	0.528063	0.722214	0	0	1.14288	0.729776	NFKBIA;IL1B
AGE-RAGE signaling pathway in diabetic complications	3/100	0.531295	0.722214	0	0	1.07802	0.681778	CXCL8;CCND1;IL1B
Progesterone-mediated oocyte maturation	3/100	0.531295	0.722214	0	0	1.07802	0.681778	HSP90AA1;HSP90AB1;GNAI2
Autophagy	4/137	0.534001	0.722214	0	0	1.04823	0.657619	HMGB1;SQSTM1;CTSD;CTSB
Fatty acid elongation	1/27	0.534438	0.722214	0	0	1.3407	0.84	PPT1
Butanoate metabolism	1/28	0.547445	0.735813	0	0	1.29098	0.777805	HMGCS1
Ubiquitin mediated proteolysis	4/140	0.551142	0.73682	0	0	1.02495	0.610629	UBC;UBA1;RPS27A;UBA52
Signaling pathways regulating pluripotency of stem cells	4/143	0.567945	0.753132	0	0	1.00268	0.567244	SOX2;APC2;CTNNB1;INHBA
Fc epsilon RI signaling pathway	2/68	0.569494	0.753132	0	0	1.05603	0.594551	FCER1G;ALOX5AP
Citrate cycle (TCA cycle)	1/30	0.57238	0.753132	0	0	1.20182	0.670557	ACLY
Asthma	1/31	0.584329	0.758178	0	0	1.1617	0.624171	FCER1G
Central carbon metabolism in cancer	2/70	0.585314	0.758178	0	0	1.02486	0.548924	LDHB;PKM
RIG-I-like receptor signaling pathway	2/70	0.585314	0.758178	0	0	1.02486	0.548924	NFKBIA;CXCL8
Breast cancer	4/147	0.589797	0.758733	0	0	0.974426	0.514474	APC2;CDKN1A;CCND1;CTNNB1
Phospholipase D signaling pathway	4/148	0.595158	0.758733	0	0	0.967609	0.502119	CXCL8;FCER1G;GNAS;RHOA
Gastric cancer	4/149	0.600477	0.758733	0	0	0.960886	0.490081	APC2;CDKN1A;CCND1;CTNNB1
Melanoma	2/72	0.600699	0.758733	0	0	0.995478	0.507356	CDKN1A;CCND1
Base excision repair	1/33	0.607235	0.758733	0	0	1.08898	0.543226	HMGB1
SNARE interactions in vesicular transport	1/33	0.607235	0.758733	0	0	1.08898	0.543226	VAMP2
Inositol phosphate metabolism	2/73	0.608229	0.758733	0	0	0.981406	0.487959	TPI1;PIP4K2B
Neutrophil extracellular trap formation	5/189	0.610021	0.758733	0	0	0.94632	0.46773	ITGB2;HMGB1;ACTB;ACTG1;SLC25A6
Propanoate metabolism	1/34	0.618211	0.765113	0	0	1.05593	0.507822	LDHB
Nicotinate and nicotinamide metabolism	1/35	0.628881	0.772267	0	0	1.02482	0.475323	NMNAT2
Pancreatic cancer	2/76	0.63017	0.772267	0	0	0.941474	0.434741	CDKN1A;CCND1
Starch and sucrose metabolism	1/36	0.639254	0.779578	0	0	0.995486	0.445434	PGM2L1
Growth hormone synthesis, secretion and action	3/119	0.649093	0.780453	0	0	0.900559	0.389203	IGFBP3;GNAS;GNAI2
African trypanosomiasis	1/37	0.649337	0.780453	0	0	0.967784	0.417893	IL1B
Aldosterone-regulated sodium reabsorption	1/37	0.649337	0.780453	0	0	0.967784	0.417893	ATP1A3
Chemical carcinogenesis	6/239	0.659606	0.789003	0	0	0.896109	0.372882	HSP90AA1;HSP90AB1;CCND1;GSTP1;GNAS;GNAI2
B cell receptor signaling pathway	2/81	0.66459	0.791178	0	0	0.881659	0.360233	NFKBIA;CD81
Various types of N-glycan biosynthesis	1/39	0.668666	0.792259	0	0	0.916753	0.368966	B4GALNT4
Wnt signaling pathway	4/166	0.684198	0.806837	0	0	0.859295	0.326109	APC2;CCND1;CTNNB1;RHOA
ErbB signaling pathway	2/85	0.690231	0.81013	0	0	0.838996	0.311041	CDKN1A;NRG4
FoxO signaling pathway	3/131	0.711827	0.831574	0	0	0.815625	0.277247	CDKN1A;CCND1;FOXG1
Hypertrophic cardiomyopathy	2/90	0.719989	0.837196	0	0	0.791122	0.259899	ACTB;ACTG1
Type II diabetes mellitus	1/46	0.728319	0.842962	0	0	0.773868	0.245328	PKM
Carbohydrate digestion and absorption	1/47	0.735917	0.84783	0	0	0.757006	0.232127	ATP1A3
Valine, leucine and isoleucine degradation	1/48	0.743302	0.85241	0	0	0.740861	0.219779	HMGCS1
Sphingolipid metabolism	1/49	0.750481	0.856713	0	0	0.725389	0.208216	PSAP
Cholesterol metabolism	1/50	0.75746	0.856855	0	0	0.710548	0.19738	LRP1
Cysteine and methionine metabolism	1/50	0.75746	0.856855	0	0	0.710548	0.19738	LDHB
Ovarian steroidogenesis	1/51	0.764243	0.860634	0	0	0.696302	0.187214	GNAS
Protein digestion and absorption	2/103	0.786239	0.881434	0	0	0.688831	0.16566	COL6A1;ATP1A3
T cell receptor signaling pathway	2/104	0.790716	0.882496	0	0	0.682043	0.160155	NFKBIA;RHOA
Hedgehog signaling pathway	1/56	0.795425	0.883805	0	0	0.632838	0.144844	CCND1
mTOR signaling pathway	3/154	0.80739	0.889657	0	0	0.690567	0.147746	RPS6;RHOA;EIF4B
Insulin resistance	2/108	0.807808	0.889657	0	0	0.656169	0.140047	NFKBIA;PTPRF
Arachidonic acid metabolism	1/61	0.822488	0.901851	0	0	0.579952	0.113335	GPX1
JAK-STAT signaling pathway	3/162	0.833709	0.906834	0	0	0.65555	0.119226	CDKN1A;CCND1;MCL1
GnRH secretion	1/64	0.836979	0.906834	0	0	0.55225	0.0982766	SPP1
Cortisol synthesis and secretion	1/65	0.841542	0.906834	0	0	0.543593	0.0937806	GNAS
Inflammatory bowel disease	1/65	0.841542	0.906834	0	0	0.543593	0.0937806	IL1B
Adipocytokine signaling pathway	1/69	0.858553	0.917258	0	0	0.511511	0.0780089	NFKBIA
Renal cell carcinoma	1/69	0.858553	0.917258	0	0	0.511511	0.0780089	CDKN1A
Prolactin signaling pathway	1/70	0.862513	0.917567	0	0	0.504072	0.0745548	CCND1
Purine metabolism	2/129	0.878625	0.930747	0	0	0.547074	0.0707899	PKM;AMPD3
Metabolism of xenobiotics by cytochrome P450	1/76	0.884054	0.932546	0	0	0.463603	0.0571331	GSTP1
Peroxisome	1/82	0.902225	0.947715	0	0	0.429129	0.0441537	PRDX1
PD-L1 expression and PD-1 checkpoint pathway in cancer	1/89	0.919863	0.9622	0	0	0.394851	0.0329822	NFKBIA
Th1 and Th2 cell differentiation	1/92	0.926413	0.965014	0	0	0.381774	0.0291808	NFKBIA
Staphylococcus aureus infection	1/95	0.932429	0.96725	0	0	0.369533	0.0258532	ITGB2
Glycerophospholipid metabolism	1/98	0.937954	0.968961	0	0	0.358048	0.0229345	PLD3
Longevity regulating pathway	1/102	0.944626	0.971837	0	0	0.343797	0.0195849	HSPA8
Drug metabolism	1/108	0.953314	0.97277	0	0	0.324418	0.0155106	GSTP1
Ribosome biogenesis in eukaryotes	1/108	0.953314	0.97277	0	0	0.324418	0.0155106	RAN
Systemic lupus erythematosus	1/135	0.978355	0.994263	0	0	0.258689	0.00566078	ACTN4
Spinocerebellar ataxia	1/143	0.982767	0.994703	0	0	0.244013	0.00424173	SLC25A6
Olfactory transduction	5/440	0.994606	0.998944	0	0	0.395066	0.00213692	RGS2;GNB1;CALM3;CALM1;CALM2
Herpes simplex virus 1 infection	6/498	0.994949	0.998944	0	0	0.418655	0.00212017	NFKBIA;IL1B;HLA-B;HLA-A;CALR;B2M
Neuroactive ligand-receptor interaction	2/341	0.999347	0.999347	0	0	0.202702	0.000132401	GRIK3;NR3C1

## Sheet: Jensen DISEASES
Term	Overlap	P-value	Adjusted P-value	Old P-value	Old Adjusted P-value	Odds Ratio	Combined Score	Genes
Diamond-Blackfan anemia	9/15	4.14155e-11	2.55534e-08	0	0	53.1038	1269.57	RPL5;RPS28;RPS7;RPS19;RPL11;RPL35A;RPL26;RPL15;RPS24
Frontotemporal dementia	9/39	9.64194e-07	0.000235831	0	0	10.6077	146.937	GRN;YWHAQ;DCTN1;FUS;TREM2;MATR3;HNRNPA1;INA;SQSTM1
Dementia	15/119	1.14667e-06	0.000235831	0	0	5.13653	70.2608	APP;CSTB;GRN;FUS;TREM2;SYP;ENO2;NRGN;TYROBP;TTR;YWHAQ;MAP2;IL1B;SNCG;MAPT
Neurodegenerative disease	24/293	2.74446e-06	0.000423334	0	0	3.20337	41.0222	APP;DYNC1H1;GRN;FUS;DCTN1;APLP1;ATN1;EEF2;NDRG1;UCHL1;CHCHD2;TRIM2;KIF5A;PPT1;KIF1B;MATR3;UBA1;KIF1A;MAPT;PFN1;HNRNPA1;CTSD;SQSTM1;FTL
Arthritis	18/186	4.93666e-06	0.000609183	0	0	3.82421	46.7273	IL1RN;CCL20;HLA-B;HLA-A;HMGB1;HSPG2;MMP9;NFKBIA;MMP14;RPS19;IL1B;SPP1;CCL3;CHI3L1;TIMP1;A2M;B2M;CTSB
Ganglioglioma	5/12	1.11785e-05	0.00101795	0	0	25.1033	286.216	MAP2;H3F3A;SYP;ENO2;QKI
Toxic encephalopathy	14/126	1.15489e-05	0.00101795	0	0	4.44164	50.4966	APP;NTRK2;HSPA5;SLC1A3;SYP;GAP43;MAP2;IL1B;CALM3;NEFM;MAPT;CALM1;CALM2;GAPDH
Periventricular nodular heterotopia	7/31	1.86113e-05	0.00132899	0	0	10.2787	111.953	DYNC1H1;TUBB2B;TUBA1A;KIF5C;DCX;FLNA;PAFAH1B1
Cerebrovascular disease	19/225	1.93856e-05	0.00132899	0	0	3.29164	35.7175	NTRK2;RPSA;SYP;HMGCR;ENO2;MMP9;RHOA;RTN4;GAP43;TTR;MAP2;IL1B;ALOX5AP;DCX;CALM3;MAPT;CALM1;CALM2;NES
Spondylolysis	4/8	3.83761e-05	0.0023678	0	0	35.0866	356.764	RPL32;FUS;RPL34;FTH1
Melanotic neuroectodermal tumor	3/5	0.000207141	0.0116187	0	0	52.5405	445.655	RPLP1;SYP;ENO2
Spinal stenosis	4/12	0.000248219	0.0117809	0	0	17.5397	145.601	RPL34;FTH1;COL6A1;IDS
Spondylolisthesis	4/12	0.000248219	0.0117809	0	0	17.5397	145.601	RPL34;FTH1;IDS;PRRC2A
Pick's disease	4/13	0.000350652	0.0154537	0	0	15.5901	124.03	GRN;YWHAQ;FUS;MAPT
Sporotrichosis	3/6	0.000405684	0.0156442	0	0	35.0252	273.545	CALM3;CALM1;CALM2
Invasive aspergillosis	3/6	0.000405684	0.0156442	0	0	35.0252	273.545	MSMO1;CALM1;CALM2
Progressive supranuclear palsy	5/24	0.000454555	0.0164576	0	0	9.24289	71.135	GRN;YWHAQ;FUS;DCTN1;UBA52
inclusion-cell disease	4/14	0.000480123	0.0164576	0	0	14.0303	107.212	MGEA5;PSAP;BSG;CTSD
Intellectual disability	19/296	0.000695048	0.0225708	0	0	2.4389	17.7345	DYNC1H1;MEF2C;STXBP1;FOXG1;NONO;SOX11;SYP;L1CAM;ACTB;SMARCA4;ACTG1;HNRNPK;PPP2R1A;EEF1A2;GNB1;CTNNB1;KIF1A;SPTAN1;RBMX
Endometrial cancer	18/292	0.00150026	0.0462829	0	0	2.33187	15.1621	MACF1;DYNC1H1;TRIO;LRP1;TNC;ANK2;CHD4;CELSR2;DCLK1;PTPRF;SFPQ;CCND1;PPP2R1A;CSDE1;KIF5A;FLNA;CTNNB1;KIF1A
Nasopharynx carcinoma	3/9	0.00160025	0.0470169	0	0	17.5099	112.722	HLA-A;WLS;IER3
Lung disease	10/119	0.0018495	0.05187	0	0	3.23662	20.3676	NFKBIA;IL1RN;IL1B;CCL3;CHI3L1;HMGB1;TIMP1;A2M;B2M;RHOA
Muckle-Wells syndrome	3/10	0.00223889	0.0600607	0	0	15.0077	91.5737	IL1RN;IL1B;ATN1
Lissencephaly	4/21	0.00245857	0.0630982	0	0	8.25016	49.5684	TUBA1A;DCX;LAMB1;PAFAH1B1
Fatty liver disease	8/85	0.00255665	0.0630982	0	0	3.65809	21.8353	HSPA5;SCD;NCAN;IL1B;FASN;PLIN2;HMGCR;SREBF2
Brain ischemia	5/35	0.00269759	0.0640159	0	0	5.85051	34.6081	MAP2;IL1B;DCX;MMP9;NES
Mevalonic aciduria	3/11	0.00301503	0.0641473	0	0	13.1311	76.2147	IL1RN;IL1B;DHCR24
Spondylosis	3/11	0.00301503	0.0641473	0	0	13.1311	76.2147	RPL34;COL6A1;RPL24
Wernicke encephalopathy	3/11	0.00301503	0.0641473	0	0	13.1311	76.2147	SLC1A3;TKT;INA
Paraplegia	7/73	0.00421242	0.0866355	0	0	3.72964	20.4001	DYNC1H1;KIF5C;DCTN1;RPL34;KIF5A;KIF1A;L1CAM
Pseudoachondroplasia	3/13	0.0050133	0.0929524	0	0	10.5038	55.6245	CALM3;CALM1;CALM2
Cryptosporidiosis	3/13	0.0050133	0.0929524	0	0	10.5038	55.6245	TPI1;DBI;MARCH6
Theileriasis	3/13	0.0050133	0.0929524	0	0	10.5038	55.6245	RPS8;RPS12;MAP4K4
Immune system cancer	10/137	0.00512217	0.0929524	0	0	2.7753	14.6374	DYNC1H1;BTG1;CCND1;LRP1;CTNNB1;ANK2;CELSR2;B2M;SPTBN1;SMARCA4
Skin disease	5/41	0.00543137	0.0957473	0	0	4.87392	25.4202	UCHL1;FLNA;NCAM1;HLA-A;MMP9
Brain disease	7/77	0.00565442	0.0969104	0	0	3.51579	18.1953	APP;MAP2;IL1B;SYP;MAPT;ENO2;RTN4
Amyloidosis	4/27	0.00631808	0.105358	0	0	6.09606	30.8725	APP;TTR;TGFBI;B2M
Large intestine cancer	9/122	0.00722345	0.109797	0	0	2.80415	13.8256	RPS9;VCAN;LRP1;PTPRZ1;CTNNB1;ANK2;KIF1B;HSPG2;SMARCA4
Echolalia	2/5	0.00734729	0.109797	0	0	23.3082	114.523	GRN;LGALS1
pseudo-Hurler polydystrophy	2/5	0.00734729	0.109797	0	0	23.3082	114.523	BSG;CTSD
Meningitis	5/44	0.00735258	0.109797	0	0	4.49831	22.0989	CADM1;IL1B;CCL3;ENO2;MMP9
Mixed connective tissue disease	3/15	0.00765195	0.109797	0	0	8.75225	42.6479	HMGN2;HSPG2;RPL7
Long QT syndrome	3/15	0.00765195	0.109797	0	0	8.75225	42.6479	ANK2;CALM3;CALM1
Lymphoid leukemia	10/152	0.0103799	0.13817	0	0	2.48021	11.3293	DYNC1H1;BTG1;CCND1;LRP1;RPLP1;CTNNB1;CELSR2;B2M;SPTBN1;SMARCA4
Otitis externa	2/6	0.0108181	0.13817	0	0	17.4802	79.1248	CALM1;CALM2
Chondroblastoma	2/6	0.0108181	0.13817	0	0	17.4802	79.1248	TUBA1C;H3F3A
Infantile onset spinocerebellar ataxia	2/6	0.0108181	0.13817	0	0	17.4802	79.1248	ATCAY;INA
Axonal neuropathy	3/17	0.010973	0.13817	0	0	7.50116	33.8476	ATCAY;TRIM2;KIF1A
Generalized anxiety disorder	3/17	0.010973	0.13817	0	0	7.50116	33.8476	SRGN;RGS2;DYNLL2
Peritonitis	4/32	0.0116049	0.140396	0	0	5.00619	22.3092	IL1B;CCL3;HMGB1;B2M
Chagas disease	4/32	0.0116049	0.140396	0	0	5.00619	22.3092	TPI1;CALR;WLS;FDFT1
Miller-Dieker lissencephaly syndrome	3/18	0.012899	0.153052	0	0	7.00072	30.4574	YWHAE;TUBA1A;PAFAH1B1
Myocardial infarction	2/7	0.0148673	0.154307	0	0	13.9835	58.8507	CELSR2;SMARCA4
Amyotrophic lateral sclerosis type 8	2/7	0.0148673	0.154307	0	0	13.9835	58.8507	MARCH6;PTPRF
Neurogenic bowel	2/7	0.0148673	0.154307	0	0	13.9835	58.8507	KIDINS220;RPL34
Goldberg-Shprintzen syndrome	2/7	0.0148673	0.154307	0	0	13.9835	58.8507	STMN2;KIF1A
Hypervitaminosis A	2/7	0.0148673	0.154307	0	0	13.9835	58.8507	TTR;RPL22
Inclusion conjunctivitis	2/7	0.0148673	0.154307	0	0	13.9835	58.8507	TMBIM6;PLD3
Pelizaeus-Merzbacher disease	3/19	0.0150055	0.154307	0	0	6.56284	27.5596	GPM6A;L1CAM;GPM6B
Spinal muscular atrophy	3/19	0.0150055	0.154307	0	0	6.56284	27.5596	KHDRBS1;HNRNPA1;PFN2
Hypertension	15/289	0.0161744	0.1636	0	0	1.93249	7.97022	MGEA5;ATP2B1;NR3C1;MMP9;ACTB;RHOA;ADD2;RGS2;RPS19;IL1B;SPP1;CALM3;CALM1;B2M;CALM2
Aphasia	3/20	0.0172945	0.165401	0	0	6.17647	25.0602	GRN;MAPT;L1CAM
Portal hypertension	3/20	0.0172945	0.165401	0	0	6.17647	25.0602	PCSK1N;MSN;EVL
Liver cancer	26/597	0.0173266	0.165401	0	0	1.61518	6.55038	MACF1;TRIO;PTPRS;LRP1;CLTC;NRXN2;CELSR2;MAP2;TNRC18;KIF1B;NCAM1;KIF1A;SPTBN1;NTRK2;DYNC1H1;ANK2;LAMB1;HSPG2;SMARCA4;VCAN;MAP1B;FASN;COL6A1;GNAS;CTNNB1;NES
Leukopenia	4/36	0.0174247	0.165401	0	0	4.37951	17.7364	CD52;IL1B;NCAM1;B2M
Adenoma	2/8	0.0194599	0.174011	0	0	11.6523	45.903	GNAS;CTNNB1
Osteoblastoma	2/8	0.0194599	0.174011	0	0	11.6523	45.903	TUBA1C;SPARC
Sertoli cell tumor	2/8	0.0194599	0.174011	0	0	11.6523	45.903	SYP;ENO2
Small intestine cancer	2/8	0.0194599	0.174011	0	0	11.6523	45.903	GNAS;CTNNB1
Multiple sclerosis	12/219	0.0203842	0.179672	0	0	2.04226	7.9505	RPL5;NDFIP1;ZMIZ1;RGS1;TRIM2;HLA-B;KIF1B;HLA-A;YWHAG;IER3;PRRC2A;ZFP36L1
Ureteral disease	3/22	0.0224242	0.19487	0	0	5.52575	20.9847	SPP1;S100A4;TIMP1
Ossifying fibroma	2/9	0.0245627	0.202069	0	0	9.98715	37.0176	GNAS;ITM2C
SAPHO syndrome	2/9	0.0245627	0.202069	0	0	9.98715	37.0176	IL1RN;KIF21B
Subependymal giant cell astrocytoma	2/9	0.0245627	0.202069	0	0	9.98715	37.0176	SYP;ENO2
Giardiasis	2/9	0.0245627	0.202069	0	0	9.98715	37.0176	TPI1;MARCH6
Tetanus	5/60	0.0257824	0.209312	0	0	3.18708	11.6585	CALM3;CALM1;CALM2;VAMP2;EIF4G2
Osteoporosis	8/130	0.0294323	0.226813	0	0	2.30343	8.12111	MEF2C;CDH2;CADM1;CTNNB1;MAPT;SPTBN1;WLS;RPS12
Bone cancer	2/10	0.0301437	0.226813	0	0	8.73831	30.5996	GNAS;CTNNB1
Right bundle branch block	2/10	0.0301437	0.226813	0	0	8.73831	30.5996	SV2A;CHD4
Smith-Lemli-Opitz syndrome	2/10	0.0301437	0.226813	0	0	8.73831	30.5996	DHCR24;MSMO1
Stevens-Johnson syndrome	2/10	0.0301437	0.226813	0	0	8.73831	30.5996	HLA-B;HSPG2
Irregular astigmatism	2/10	0.0301437	0.226813	0	0	8.73831	30.5996	RPS27;RPS18
Essential tremor	3/25	0.0315005	0.231379	0	0	4.7715	16.4987	CHCHD2;FUS;VIM
Wiskott-Aldrich syndrome	3/25	0.0315005	0.231379	0	0	4.7715	16.4987	ACTR2;CFL1;FNBP1L
Liver disease	3/26	0.0348917	0.247981	0	0	4.56381	15.3139	CDH2;CELF5;FDFT1
Microsporidiosis	2/11	0.0361723	0.247981	0	0	7.76699	25.7822	TPI1;MARCH6
Myelomeningocele	2/11	0.0361723	0.247981	0	0	7.76699	25.7822	MARCKSL1;RPL34
Amyotrophic neuralgia	2/11	0.0361723	0.247981	0	0	7.76699	25.7822	SEPT11;KIF1B
Clostridium difficile colitis	2/11	0.0361723	0.247981	0	0	7.76699	25.7822	RHOA;CLASP2
Intestinal benign neoplasm	2/11	0.0361723	0.247981	0	0	7.76699	25.7822	CCND1;CTNNB1
Neuropathy	6/89	0.0382159	0.259112	0	0	2.53523	8.27626	DYNC1H1;TTR;TRIM2;KIF1B;KIF1A;NDRG1
Malignant hyperthermia	3/28	0.0422137	0.279746	0	0	4.19827	13.2876	CALM3;CALM1;CALM2
Migraine	2/12	0.0426193	0.279746	0	0	6.98993	22.0564	LRP1;INA
Neuronal ceroid lipofuscinosis	2/12	0.0426193	0.279746	0	0	6.98993	22.0564	PPT1;CTSD
Mucoepidermoid carcinoma	2/13	0.0494567	0.306914	0	0	6.35415	19.1048	SLC25A3;NUDT3
Neurogenic bladder	2/13	0.0494567	0.306914	0	0	6.35415	19.1048	KIDINS220;RPS24
Chorioamnionitis	2/13	0.0494567	0.306914	0	0	6.35415	19.1048	IL1B;TRIM67
Fibroma	2/13	0.0494567	0.306914	0	0	6.35415	19.1048	MACF1;TNC
Gingivitis	2/13	0.0494567	0.306914	0	0	6.35415	19.1048	IL1B;SMARCA4
Hemochromatosis	3/30	0.0502403	0.306914	0	0	3.88689	11.6254	HLA-A;B2M;FTL
Hyperphosphatemia	3/30	0.0502403	0.306914	0	0	3.88689	11.6254	SLC20A1;SPP1;GNAS
Ovarian cancer	4/51	0.0535194	0.3178	0	0	2.97949	8.72309	MACF1;PPP2R1A;GNAS;CTNNB1
Charcot-Marie-Tooth disease	4/51	0.0535194	0.3178	0	0	2.97949	8.72309	DYNC1H1;TRIM2;KIF1B;NDRG1
Pituitary adenoma	3/31	0.0545112	0.3178	0	0	3.74788	10.9039	GNAS;SYP;NR3C1
Cataract	5/74	0.055696	0.3178	0	0	2.53859	7.33106	VCAN;MSMO1;VIM;LSS;FTL
Biliary tract cancer	2/14	0.0566579	0.3178	0	0	5.82434	16.7201	GNAS;CTNNB1
Radiculopathy	2/14	0.0566579	0.3178	0	0	5.82434	16.7201	RPL34;COL6A1
Skin atrophy	2/14	0.0566579	0.3178	0	0	5.82434	16.7201	RPL13;SAT1
Stomach cancer	2/14	0.0566579	0.3178	0	0	5.82434	16.7201	GNAS;CTNNB1
Facial paralysis	2/14	0.0566579	0.3178	0	0	5.82434	16.7201	CD82;CADM1
Bipolar disorder	7/124	0.0589464	0.327657	0	0	2.09836	5.94072	GPM6A;CDH2;ZMIZ1;NCAN;HLA-B;HLA-A;HNRNPC
Arthropathy	3/33	0.0635528	0.332855	0	0	3.49766	9.63914	IL1RN;IL1B;B2M
Degenerative disc disease	3/33	0.0635528	0.332855	0	0	3.49766	9.63914	FTH1;IL1B;TIMP1
Aicardi syndrome	2/15	0.0641973	0.332855	0	0	5.37604	14.7615	FLNA;GPM6B
Bowen-Conradi syndrome	2/15	0.0641973	0.332855	0	0	5.37604	14.7615	RPS19;RPS18
Plague	2/15	0.0641973	0.332855	0	0	5.37604	14.7615	VCAN;GAP43
Spindle cell hemangioma	2/15	0.0641973	0.332855	0	0	5.37604	14.7615	ATP5G3;ATP5G2
Gangliosidosis	2/15	0.0641973	0.332855	0	0	5.37604	14.7615	MGEA5;PSAP
Lambert-Eaton myasthenic syndrome	2/15	0.0641973	0.332855	0	0	5.37604	14.7615	SYT1;AGRN
Vascular disease	5/78	0.0668269	0.343602	0	0	2.39899	6.49084	MEF2C;TSC22D1;TNC;CDH13;CELSR2
Urticaria	3/34	0.0683164	0.348357	0	0	3.38466	9.08308	CD63;IL1RN;TPT1
Pathological gambling	2/16	0.0720505	0.358509	0	0	4.99178	13.1303	SRGN;RTN4
Corneal dystrophy	2/16	0.0720505	0.358509	0	0	4.99178	13.1303	TGFBI;SAT1
Gastrointestinal system disease	2/16	0.0720505	0.358509	0	0	4.99178	13.1303	NDRG4;ZMIZ1
Periodontitis	3/35	0.0732371	0.361499	0	0	3.27872	8.57074	IL1RN;IL1B;MMP9
Exanthem	3/36	0.078311	0.369252	0	0	3.1792	8.09763	IL1RN;IL1B;HSPG2
Uveitis	3/36	0.078311	0.369252	0	0	3.1792	8.09763	IL1RN;HLA-B;HLA-A
Basal ganglia calcification	2/17	0.0801942	0.369252	0	0	4.65875	11.7555	SLC20A1;XPR1
Papilloma	2/17	0.0801942	0.369252	0	0	4.65875	11.7555	CCND1;SYP
Coffin-Siris syndrome	2/17	0.0801942	0.369252	0	0	4.65875	11.7555	SOX11;SMARCA4
Takayasu's arteritis	2/17	0.0801942	0.369252	0	0	4.65875	11.7555	RPS9;HLA-B
Testicular cancer	2/17	0.0801942	0.369252	0	0	4.65875	11.7555	CTNNB1;ADD2
relapsing-remitting multiple sclerosis	2/17	0.0801942	0.369252	0	0	4.65875	11.7555	CELF2;ELAVL3
Insulinoma	2/17	0.0801942	0.369252	0	0	4.65875	11.7555	RPS15;CPE
Idiopathic scoliosis	3/37	0.083534	0.381781	0	0	3.08553	7.65984	CALM3;CALM1;CALM2
Eye and adnexa disease	2/18	0.0886061	0.391803	0	0	4.36736	10.5845	USP11;ATP2B1
Thyroid cancer	2/18	0.0886061	0.391803	0	0	4.36736	10.5845	GNAS;CTNNB1
Lymphatic system disease	2/18	0.0886061	0.391803	0	0	4.36736	10.5845	IL1B;B2M
Schistosomiasis	3/38	0.0889019	0.391803	0	0	2.99722	7.25394	TPI1;GAPDH;CTSB
post-traumatic stress disorder	3/38	0.0889019	0.391803	0	0	2.99722	7.25394	NTRK2;NR3C1;RTN4
Amnestic disorder	3/39	0.0944105	0.41313	0	0	2.91381	6.8769	RPL4;CHL1;EIF4G2
Botulism	2/19	0.097265	0.413879	0	0	4.11024	9.57816	SYT1;SV2A
Carpal tunnel syndrome	2/19	0.097265	0.413879	0	0	4.11024	9.57816	TTR;B2M
Pertussis	2/19	0.097265	0.413879	0	0	4.11024	9.57816	CALM3;CALM2
Legionnaires' disease	2/19	0.097265	0.413879	0	0	4.11024	9.57816	ANK2;RAN
Down syndrome	5/89	0.103265	0.430372	0	0	2.08366	4.73085	APP;COL6A1;TTC3;MAPT;DBN1
Behcet's disease	2/20	0.106151	0.430372	0	0	3.88169	8.70624	HLA-B;HLA-A
Pitt-Hopkins syndrome	2/20	0.106151	0.430372	0	0	3.88169	8.70624	MEF2C;FOXG1
Metachromatic leukodystrophy	1/4	0.107023	0.430372	0	0	11.6332	25.9967	PSAP
DOID:2627	5/92	0.114619	0.430372	0	0	2.01149	4.35718	MACF1;CHL1;H3F3A;ANK2;HSPG2
Osteomyelitis	2/21	0.115244	0.430372	0	0	3.67721	7.94536	IL1RN;IL1B
Spinal cord disease	2/21	0.115244	0.430372	0	0	3.67721	7.94536	COL6A1;HNRNPA1
Heart disease	5/94	0.122506	0.430372	0	0	1.96609	4.12799	RPL3;CHL1;PKIA;TKT;TRIB2
Candidiasis	3/44	0.123909	0.430372	0	0	2.55781	5.34125	HSP90AA1;IL1B;ENO1
Rhinitis	2/22	0.124526	0.430372	0	0	3.49317	7.27712	CD63;IL1B
Schnyder corneal dystrophy	2/22	0.124526	0.430372	0	0	3.49317	7.27712	CLSTN1;ATP2B1
Cerebellar ataxia	4/69	0.126623	0.430372	0	0	2.1524	4.44802	ATCAY;DPYSL5;DNER;ATP1A3
Keratoconus	3/45	0.130167	0.430372	0	0	2.49678	5.09077	FLNA;TIMP1;TGFBI
Acrodysostosis	1/5	0.131942	0.430372	0	0	8.72442	17.6704	GNAS
Acute promyelocytic leukemia	1/5	0.131942	0.430372	0	0	8.72442	17.6704	NPM1
Adrenal gland cancer	1/5	0.131942	0.430372	0	0	8.72442	17.6704	GNAS
Mucopolysaccharidosis II	1/5	0.131942	0.430372	0	0	8.72442	17.6704	IDS
Agraphia	1/5	0.131942	0.430372	0	0	8.72442	17.6704	GRN
Myelofibrosis	1/5	0.131942	0.430372	0	0	8.72442	17.6704	CALR
Ohdo syndrome	1/5	0.131942	0.430372	0	0	8.72442	17.6704	YWHAE
Autosomal recessive early-onset Parkinson disease 15	1/5	0.131942	0.430372	0	0	8.72442	17.6704	MAGED1
Burkitt lymphoma	1/5	0.131942	0.430372	0	0	8.72442	17.6704	MAPRE2
Cervicitis	1/5	0.131942	0.430372	0	0	8.72442	17.6704	FLNA
Pollen allergy	1/5	0.131942	0.430372	0	0	8.72442	17.6704	CD164
Chromosome 13q14 deletion syndrome	1/5	0.131942	0.430372	0	0	8.72442	17.6704	SOX11
Chromosome 4q21 deletion syndrome	1/5	0.131942	0.430372	0	0	8.72442	17.6704	HNRNPD
Chronic NK-cell lymphocytosis	1/5	0.131942	0.430372	0	0	8.72442	17.6704	NCAM1
Progressive muscular atrophy	1/5	0.131942	0.430372	0	0	8.72442	17.6704	KIF5C
Prostatic adenoma	1/5	0.131942	0.430372	0	0	8.72442	17.6704	SLC25A6
Retinitis	1/5	0.131942	0.430372	0	0	8.72442	17.6704	ACTG1
Cutaneous anthrax	1/5	0.131942	0.430372	0	0	8.72442	17.6704	EEF1A1
DOID:3858	1/5	0.131942	0.430372	0	0	8.72442	17.6704	SMARCA4
Dressler's syndrome	1/5	0.131942	0.430372	0	0	8.72442	17.6704	CKB
Spiradenoma	1/5	0.131942	0.430372	0	0	8.72442	17.6704	PHLDA1
Splenic infarction	1/5	0.131942	0.430372	0	0	8.72442	17.6704	PCSK1N
Subclavian artery aneurysm	1/5	0.131942	0.430372	0	0	8.72442	17.6704	PCSK1N
Giant cell tumor	1/5	0.131942	0.430372	0	0	8.72442	17.6704	H3F3A
Goodpasture syndrome	1/5	0.131942	0.430372	0	0	8.72442	17.6704	RAN
Vitreous syneresis	1/5	0.131942	0.430372	0	0	8.72442	17.6704	VCAN
Hyperlysinemia	1/5	0.131942	0.430372	0	0	8.72442	17.6704	PTPRZ1
Hypochromic anemia	1/5	0.131942	0.430372	0	0	8.72442	17.6704	NDFIP1
Lethal midline granuloma	1/5	0.131942	0.430372	0	0	8.72442	17.6704	NCAM1
Lipoid proteinosis	1/5	0.131942	0.430372	0	0	8.72442	17.6704	HSPG2
Choreatic disease	2/23	0.133979	0.430372	0	0	3.32665	6.68682	DPYSL5;FTL
Esophageal atresia	2/23	0.133979	0.430372	0	0	3.32665	6.68682	SOX2;KIDINS220
Ankylosing spondylitis	2/24	0.143587	0.430372	0	0	3.17528	6.16263	HLA-B;KIF21B
Connective tissue disease	2/24	0.143587	0.430372	0	0	3.17528	6.16263	CTNNB1;EIF3E
Treacher Collins syndrome	2/24	0.143587	0.430372	0	0	3.17528	6.16263	RPS14;RPS28
Cardiovascular system disease	10/246	0.151658	0.430372	0	0	1.48506	2.80101	FADS2;MEF2C;CD82;CDH2;NCAN;RPLP1;CDH13;HMGCR;CELSR2;SMARCA4
Lung cancer	15/400	0.152579	0.430372	0	0	1.36737	2.57075	NTRK2;MEF2C;RTN1;INHBA;SMARCA4;VCAN;CDH2;PTPRZ1;DNER;GNAS;CTNNB1;KIF1B;LCP1;NES;LRRC4B
Multiple endocrine neoplasia type 1	2/25	0.153333	0.430372	0	0	3.03707	5.69492	JUND;GNAS
Apraxia	2/25	0.153333	0.430372	0	0	3.03707	5.69492	GRN;MAPT
Astigmatism	2/25	0.153333	0.430372	0	0	3.03707	5.69492	SBK1;FLNA
Peripheral neuropathy	2/25	0.153333	0.430372	0	0	3.03707	5.69492	KIF1A;NDRG1
Familial adenomatous polyposis	2/25	0.153333	0.430372	0	0	3.03707	5.69492	CCND1;CTNNB1
Lyme disease	2/25	0.153333	0.430372	0	0	3.03707	5.69492	YBX1;CXCL13
Mouth disease	1/6	0.156167	0.430372	0	0	6.97917	12.9591	SPP1
Neuroaxonal dystrophy	1/6	0.156167	0.430372	0	0	6.97917	12.9591	SYT4
Paraganglioma	1/6	0.156167	0.430372	0	0	6.97917	12.9591	KIF1B
Chancroid	1/6	0.156167	0.430372	0	0	6.97917	12.9591	PRDX6
Recurrent corneal erosion	1/6	0.156167	0.430372	0	0	6.97917	12.9591	TGFBI
Creutzfeldt-Jakob disease	1/6	0.156167	0.430372	0	0	6.97917	12.9591	STMN2
Cushing's syndrome	1/6	0.156167	0.430372	0	0	6.97917	12.9591	GNAS
Dacryoadenitis	1/6	0.156167	0.430372	0	0	6.97917	12.9591	HSPG2
Scabies	1/6	0.156167	0.430372	0	0	6.97917	12.9591	FLNA
Diffuse idiopathic skeletal hyperostosis	1/6	0.156167	0.430372	0	0	6.97917	12.9591	COL6A1
Skeletal muscle neoplasm	1/6	0.156167	0.430372	0	0	6.97917	12.9591	NACA
Spinocerebellar ataxia type 17	1/6	0.156167	0.430372	0	0	6.97917	12.9591	HSPA8
Epidermolysis bullosa acquisita	1/6	0.156167	0.430372	0	0	6.97917	12.9591	HSP90AA1
Supratentorial primitive neuroectodermal tumor	1/6	0.156167	0.430372	0	0	6.97917	12.9591	MPRIP
Ewing sarcoma	1/6	0.156167	0.430372	0	0	6.97917	12.9591	FUS
Vaginal discharge	1/6	0.156167	0.430372	0	0	6.97917	12.9591	FLNA
Vestibular neuronitis	1/6	0.156167	0.430372	0	0	6.97917	12.9591	EIF1
Ileocolitis	1/6	0.156167	0.430372	0	0	6.97917	12.9591	GPX1
Infantile myofibromatosis	1/6	0.156167	0.430372	0	0	6.97917	12.9591	NDRG4
Inverted papilloma	1/6	0.156167	0.430372	0	0	6.97917	12.9591	FSCN1
Liver neoplasm	1/6	0.156167	0.430372	0	0	6.97917	12.9591	AMPD3
Lymphocele	1/6	0.156167	0.430372	0	0	6.97917	12.9591	RPL34
Hereditary spastic paraplegia	3/49	0.156245	0.430372	0	0	2.2792	4.23094	KIF5A;KIF1A;L1CAM
Chronic fatigue syndrome	2/26	0.163204	0.431461	0	0	2.91037	5.2758	MACF1;NR3C1
Malaria	2/26	0.163204	0.431461	0	0	2.91037	5.2758	RGS2;CDH13
Lupus erythematosus	4/77	0.167895	0.431461	0	0	1.91573	3.41846	H1F0;HMGB1;RPS2;CALR
Prostate cancer	5/105	0.170045	0.431461	0	0	1.74882	3.09838	TUBA1C;CHL1;PKIA;TNC;ANK2
Oculocutaneous albinism	2/27	0.173183	0.431461	0	0	2.79381	4.89869	CD63;CANX
Brucellosis	2/27	0.173183	0.431461	0	0	2.79381	4.89869	RPL9;RPL7
Hyperhomocysteinemia	2/27	0.173183	0.431461	0	0	2.79381	4.89869	HSPA5;MMP9
Essential hypertension	4/78	0.173358	0.431461	0	0	1.88975	3.31158	RGS1;MAP4;ATP2B1;RPL6
Major depressive disorder	4/79	0.178882	0.431461	0	0	1.86445	3.20878	NTRK2;IL1B;NR3C1;RTN4
Motor peripheral neuropathy	1/7	0.179717	0.431461	0	0	5.81568	9.98187	NDRG4
Multiple personality disorder	1/7	0.179717	0.431461	0	0	5.81568	9.98187	PEG10
Mutism	1/7	0.179717	0.431461	0	0	5.81568	9.98187	ATP1A3
Alpha thalassemia	1/7	0.179717	0.431461	0	0	5.81568	9.98187	SMARCA4
Neonatal abstinence syndrome	1/7	0.179717	0.431461	0	0	5.81568	9.98187	PNOC
Ocular hypotension	1/7	0.179717	0.431461	0	0	5.81568	9.98187	ZIC1
Onchocerciasis	1/7	0.179717	0.431461	0	0	5.81568	9.98187	CALR
Bacillary angiomatosis	1/7	0.179717	0.431461	0	0	5.81568	9.98187	RPL4
Baraitser-Winter syndrome	1/7	0.179717	0.431461	0	0	5.81568	9.98187	ACTB
Blau syndrome	1/7	0.179717	0.431461	0	0	5.81568	9.98187	ATN1
Borna disease	1/7	0.179717	0.431461	0	0	5.81568	9.98187	S100A10
Peyronie's disease	1/7	0.179717	0.431461	0	0	5.81568	9.98187	PTN
Chromosome 2p16.1-p15 deletion syndrome	1/7	0.179717	0.431461	0	0	5.81568	9.98187	RPS5
Psoriatic arthritis	1/7	0.179717	0.431461	0	0	5.81568	9.98187	HLA-B
Sinoatrial node disease	1/7	0.179717	0.431461	0	0	5.81568	9.98187	MALAT1
Endometrial stromal nodule	1/7	0.179717	0.431461	0	0	5.81568	9.98187	YWHAE
Eosinophilic meningitis	1/7	0.179717	0.431461	0	0	5.81568	9.98187	YWHAB
Esophageal carcinoma	1/7	0.179717	0.431461	0	0	5.81568	9.98187	CTNNB1
Farber lipogranulomatosis	1/7	0.179717	0.431461	0	0	5.81568	9.98187	PSAP
Funisitis	1/7	0.179717	0.431461	0	0	5.81568	9.98187	TRIM67
Glomerulonephritis	1/7	0.179717	0.431461	0	0	5.81568	9.98187	FTH1
Granular cell tumor	1/7	0.179717	0.431461	0	0	5.81568	9.98187	UCHL1
protein-energy malnutrition	1/7	0.179717	0.431461	0	0	5.81568	9.98187	TTR
Laron syndrome	1/7	0.179717	0.431461	0	0	5.81568	9.98187	IGFBP3
Personality disorder	2/28	0.183257	0.434763	0	0	2.68622	4.55815	FLNA;RTN4
Dystonia	2/28	0.183257	0.434763	0	0	2.68622	4.55815	ATP1A3;ACTB
Turner syndrome	2/28	0.183257	0.434763	0	0	2.68622	4.55815	RPS4X;IGFBP3
Multiple system atrophy	2/29	0.193414	0.434763	0	0	2.5866	4.24958	SNCG;MAPT
Polyneuropathy	2/29	0.193414	0.434763	0	0	2.5866	4.24958	TTR;KIF1B
Mental depression	4/82	0.195794	0.434763	0	0	1.79247	2.92295	SYT4;VCAN;CHL1;CDH13
Metanephric adenoma	1/8	0.202611	0.434763	0	0	4.98461	7.95777	NCAM1
Myelodysplastic syndrome	1/8	0.202611	0.434763	0	0	4.98461	7.95777	RPS14
Necrotizing fasciitis	1/8	0.202611	0.434763	0	0	4.98461	7.95777	RPS16
Olivopontocerebellar atrophy	1/8	0.202611	0.434763	0	0	4.98461	7.95777	MAP1B
Paroxysmal nocturnal hemoglobinuria	1/8	0.202611	0.434763	0	0	4.98461	7.95777	CD14
Pigmented villonodular synovitis	1/8	0.202611	0.434763	0	0	4.98461	7.95777	LAPTM5
Choroid plexus papilloma	1/8	0.202611	0.434763	0	0	4.98461	7.95777	TTR
Primary pigmented nodular adrenocortical disease	1/8	0.202611	0.434763	0	0	4.98461	7.95777	GNAS
Schimke immuno-osseous dysplasia	1/8	0.202611	0.434763	0	0	4.98461	7.95777	SMARCA4
Developmental coordination disorder	1/8	0.202611	0.434763	0	0	4.98461	7.95777	RTN4
Dysembryoplastic neuroepithelial tumor	1/8	0.202611	0.434763	0	0	4.98461	7.95777	TUBB3
Erythema multiforme	1/8	0.202611	0.434763	0	0	4.98461	7.95777	HLA-A
Fabry disease	1/8	0.202611	0.434763	0	0	4.98461	7.95777	GRINA
Focal dermal hypoplasia	1/8	0.202611	0.434763	0	0	4.98461	7.95777	WLS
Wernicke-Korsakoff syndrome	1/8	0.202611	0.434763	0	0	4.98461	7.95777	TKT
Hemorrhagic disease	1/8	0.202611	0.434763	0	0	4.98461	7.95777	CALR
Henoch-Schoenlein purpura	1/8	0.202611	0.434763	0	0	4.98461	7.95777	HSP90AA1
Hiatus hernia	1/8	0.202611	0.434763	0	0	4.98461	7.95777	ISLR2
Keratoconjunctivitis	1/8	0.202611	0.434763	0	0	4.98461	7.95777	PLD3
Lymphogranuloma venereum	1/8	0.202611	0.434763	0	0	4.98461	7.95777	TMBIM6
Malignant fibroxanthoma	1/8	0.202611	0.434763	0	0	4.98461	7.95777	RUFY3
Ataxia telangiectasia	2/30	0.203641	0.434763	0	0	2.49409	3.96909	CDKN1A;XRCC5
Congenital hemolytic anemia	2/30	0.203641	0.434763	0	0	2.49409	3.96909	TPI1;ALDOA
Specific language impairment	2/30	0.203641	0.434763	0	0	2.49409	3.96909	CELF3;TRIM67
Uterine fibroid	2/30	0.203641	0.434763	0	0	2.49409	3.96909	VCAN;S100A6
Hemangioma	2/30	0.203641	0.434763	0	0	2.49409	3.96909	SYP;ENO2
Pancreatitis	4/84	0.207332	0.434931	0	0	1.74747	2.74953	IL1B;HMGB1;A2M;CTSB
Hydrocephalus	3/57	0.212448	0.434931	0	0	1.94074	3.00632	CHL1;L1CAM;NES
Ulcerative colitis	5/115	0.21845	0.434931	0	0	1.58902	2.41721	ARPC2;CDH13;LAMB1;KIF21B;HLA-A
Cancer	11/300	0.218583	0.434931	0	0	1.33274	2.02654	MLLT11;NPM1;SET;BTG1;CCND1;FUS;RUFY3;GNAS;TXNIP;RBMX;RHOA
Prader-Willi syndrome	3/58	0.219765	0.434931	0	0	1.90536	2.88699	SNRPN;MAGED1;IGFBP2
Mood disorder	1/9	0.224867	0.434931	0	0	4.36131	6.50815	ATP5G3
Myotonia congenita	1/9	0.224867	0.434931	0	0	4.36131	6.50815	CNBP
Asthenopia	1/9	0.224867	0.434931	0	0	4.36131	6.50815	CADM1
Parathyroid adenoma	1/9	0.224867	0.434931	0	0	4.36131	6.50815	CCND1
Pilomatrixoma	1/9	0.224867	0.434931	0	0	4.36131	6.50815	CTNNB1
Common variable immunodeficiency	1/9	0.224867	0.434931	0	0	4.36131	6.50815	CD81
Corneal ectasia	1/9	0.224867	0.434931	0	0	4.36131	6.50815	SBK1
Detrusor sphincter dyssynergia	1/9	0.224867	0.434931	0	0	4.36131	6.50815	RPS24
Sialadenitis	1/9	0.224867	0.434931	0	0	4.36131	6.50815	HSPG2
Spermatic cord torsion	1/9	0.224867	0.434931	0	0	4.36131	6.50815	SPTAN1
Esophageal varix	1/9	0.224867	0.434931	0	0	4.36131	6.50815	EVL
Gastroschisis	1/9	0.224867	0.434931	0	0	4.36131	6.50815	INA
Ureterocele	1/9	0.224867	0.434931	0	0	4.36131	6.50815	PTPRF
blepharophimosis, ptosis, and epicanthus inversus syndrome	1/9	0.224867	0.434931	0	0	4.36131	6.50815	ZIC1
Herpes zoster	1/9	0.224867	0.434931	0	0	4.36131	6.50815	RPS24
Hidradenitis suppurativa	1/9	0.224867	0.434931	0	0	4.36131	6.50815	RPS28
locked-in syndrome	1/9	0.224867	0.434931	0	0	4.36131	6.50815	FUS
Hyperkalemic periodic paralysis	1/9	0.224867	0.434931	0	0	4.36131	6.50815	PTPRZ1
Hypersplenism	1/9	0.224867	0.434931	0	0	4.36131	6.50815	EVL
Hyperthyroxinemia	1/9	0.224867	0.434931	0	0	4.36131	6.50815	TTR
Hypophosphatasia	1/9	0.224867	0.434931	0	0	4.36131	6.50815	SPP1
IgA glomerulonephritis	1/9	0.224867	0.434931	0	0	4.36131	6.50815	HLA-A
Inclusion body myopathy with Paget disease of bone and frontotemporal dementia	1/9	0.224867	0.434931	0	0	4.36131	6.50815	SQSTM1
Inclusion body myositis	1/9	0.224867	0.434931	0	0	4.36131	6.50815	APP
Kindler syndrome	1/9	0.224867	0.434931	0	0	4.36131	6.50815	MSN
Breast cancer	15/434	0.233439	0.443418	0	0	1.25417	1.82461	MACF1;DYNC1H1;LRP1;H3F3A;TNC;ANK2;HSPG2;DCLK1;SMARCA4;CCND1;ZMIZ1;CHL1;FLNA;CTNNB1;SPTAN1
Cholera	2/33	0.234626	0.443418	0	0	2.25238	3.26542	GNAO1;NONO
obsessive-compulsive disorder	2/33	0.234626	0.443418	0	0	2.25238	3.26542	GRIK3;RTN4
Hyperopia	2/33	0.234626	0.443418	0	0	2.25238	3.26542	SBK1;TUBB3
Muscular atrophy	3/61	0.242002	0.443418	0	0	1.80652	2.56311	DYNC1H1;MAP1B;UBA1
Disease of mental health	2/34	0.24502	0.443418	0	0	2.18188	3.06863	SYT1;RPL9
Acrocallosal syndrome	1/10	0.246503	0.443418	0	0	3.87652	5.42861	ACLY
Acute pancreatitis	1/10	0.246503	0.443418	0	0	3.87652	5.42861	SAT1
Musculoskeletal system disease	1/10	0.246503	0.443418	0	0	3.87652	5.42861	HLA-B
Benign epilepsy with centrotemporal spikes	1/10	0.246503	0.443418	0	0	3.87652	5.42861	RBFOX2
Prostate carcinoma in situ	1/10	0.246503	0.443418	0	0	3.87652	5.42861	ALDOA
Congenital fibrosis of the extraocular muscles	1/10	0.246503	0.443418	0	0	3.87652	5.42861	KIF21B
Contagious pustular dermatitis	1/10	0.246503	0.443418	0	0	3.87652	5.42861	SERBP1
Decubitus ulcer	1/10	0.246503	0.443418	0	0	3.87652	5.42861	TTR
Tethered spinal cord syndrome	1/10	0.246503	0.443418	0	0	3.87652	5.42861	KIDINS220
Thymoma	1/10	0.246503	0.443418	0	0	3.87652	5.42861	DPYSL5
Tinea capitis	1/10	0.246503	0.443418	0	0	3.87652	5.42861	SAT1
Fibrous dysplasia	1/10	0.246503	0.443418	0	0	3.87652	5.42861	GNAS
Glycoproteinosis	1/10	0.246503	0.443418	0	0	3.87652	5.42861	PSAP
chorea-acanthocytosis	1/10	0.246503	0.443418	0	0	3.87652	5.42861	ADD2
Hydranencephaly	1/10	0.246503	0.443418	0	0	3.87652	5.42861	TUBA1A
Krabbe disease	1/10	0.246503	0.443418	0	0	3.87652	5.42861	PSAP
Langerhans-cell histiocytosis	1/10	0.246503	0.443418	0	0	3.87652	5.42861	FSCN1
Macular holes	1/10	0.246503	0.443418	0	0	3.87652	5.42861	ALOX5AP
Kidney disease	4/91	0.249095	0.446778	0	0	1.60629	2.23262	GNAS;NRXN2;CALM2;RPS12
Asthma	4/92	0.255207	0.45101	0	0	1.58796	2.16864	TOP2A;NDFIP1;NUCKS1;DCLK1
Hyperthyroidism	2/35	0.255431	0.45101	0	0	2.11565	2.88745	TTR;GNAS
Lipid metabolism disorder	2/35	0.255431	0.45101	0	0	2.11565	2.88745	HMGCR;CELSR2
Vitiligo	3/63	0.257024	0.45101	0	0	1.74613	2.37226	ZMIZ1;HLA-A;IER3
Allergic hypersensitivity disease	5/123	0.259849	0.45101	0	0	1.48068	1.99544	MGEA5;CD63;IL1B;HSPG2;TPT1
Muscular dystrophy	2/36	0.26585	0.45101	0	0	2.05332	2.72029	CNBP;COL6A1
Mucopolysaccharidosis	1/11	0.267536	0.45101	0	0	3.48869	4.59984	IDS
Myocarditis	1/11	0.267536	0.45101	0	0	3.48869	4.59984	CCL3
Pasteurellosis	1/11	0.267536	0.45101	0	0	3.48869	4.59984	RPS28
Campylobacteriosis	1/11	0.267536	0.45101	0	0	3.48869	4.59984	RPS21
Central sleep apnea	1/11	0.267536	0.45101	0	0	3.48869	4.59984	STMN3
Cervix uteri carcinoma in situ	1/11	0.267536	0.45101	0	0	3.48869	4.59984	MRFAP1
Citrullinemia	1/11	0.267536	0.45101	0	0	3.48869	4.59984	SLC25A3
Rectal prolapse	1/11	0.267536	0.45101	0	0	3.48869	4.59984	KIDINS220
Cornea plana	1/11	0.267536	0.45101	0	0	3.48869	4.59984	SBK1
Dermatomyositis	1/11	0.267536	0.45101	0	0	3.48869	4.59984	HSPG2
Short QT syndrome	1/11	0.267536	0.45101	0	0	3.48869	4.59984	RPS5
Stiff-Person syndrome	1/11	0.267536	0.45101	0	0	3.48869	4.59984	DPYSL5
Esotropia	1/11	0.267536	0.45101	0	0	3.48869	4.59984	RPL18
Hirschsprung's disease	1/11	0.267536	0.45101	0	0	3.48869	4.59984	L1CAM
Histiocytosis	1/11	0.267536	0.45101	0	0	3.48869	4.59984	UCHL1
MASA syndrome	1/11	0.267536	0.45101	0	0	3.48869	4.59984	L1CAM
Thrombocytopenia	4/95	0.273718	0.460174	0	0	1.53537	1.98931	CD52;FOXG1;NCAM1;B2M
Acute cystitis	2/37	0.276268	0.461944	0	0	1.99455	2.56576	MGEA5;B2M
Periodontal disease	2/37	0.276268	0.461944	0	0	1.99455	2.56576	CCL20;TIMP1
Hyperparathyroidism	2/38	0.286677	0.463931	0	0	1.93905	2.42265	CCND1;B2M
Anal fistula	1/12	0.287983	0.463931	0	0	3.17137	3.9479	KIDINS220
Narcolepsy	1/12	0.287983	0.463931	0	0	3.17137	3.9479	CDH13
Neutral lipid storage disease	1/12	0.287983	0.463931	0	0	3.17137	3.9479	PLIN2
Autoimmune thrombocytopenic purpura	1/12	0.287983	0.463931	0	0	3.17137	3.9479	FOXG1
Pneumocystosis	1/12	0.287983	0.463931	0	0	3.17137	3.9479	ACTG1
Chronic intestinal vascular insufficiency	1/12	0.287983	0.463931	0	0	3.17137	3.9479	WLS
Sideroblastic anemia	1/12	0.287983	0.463931	0	0	3.17137	3.9479	PJA2
Duodenal ulcer	1/12	0.287983	0.463931	0	0	3.17137	3.9479	IL1RN
Ebstein anomaly	1/12	0.287983	0.463931	0	0	3.17137	3.9479	MAP6
Spastic ataxia	1/12	0.287983	0.463931	0	0	3.17137	3.9479	ATCAY
Spondyloepiphyseal dysplasia with congenital joint dislocations	1/12	0.287983	0.463931	0	0	3.17137	3.9479	SMARCA4
Esophageal cancer	1/12	0.287983	0.463931	0	0	3.17137	3.9479	RPL6
Lateral sclerosis	1/12	0.287983	0.463931	0	0	3.17137	3.9479	FUS
Globe disease	3/68	0.295047	0.466707	0	0	1.61139	1.9669	CHD4;SPTBN1;TPT1
Chondrodysplasia punctata	2/39	0.29707	0.466707	0	0	1.88654	2.28987	MSMO1;DHCR24
Keratitis	2/39	0.29707	0.466707	0	0	1.88654	2.28987	GDI1;CCL3
Parkinson's disease	4/99	0.298725	0.466707	0	0	1.47042	1.7766	NUCKS1;MAPT;GPM6B;CTSB
Human immunodeficiency virus infectious disease	3/69	0.302703	0.466707	0	0	1.5869	1.89635	HLA-B;CCL3;NCAM1
Optic atrophy	2/40	0.307439	0.466707	0	0	1.8368	2.16647	NR2F1;ATP1A3
Amyotrophic lateral sclerosis type 5	1/13	0.30786	0.466707	0	0	2.90694	3.4247	TRIM2
Neonatal jaundice	1/13	0.30786	0.466707	0	0	2.90694	3.4247	PKM
Babesiosis	1/13	0.30786	0.466707	0	0	2.90694	3.4247	RPS8
Basal cell carcinoma	1/13	0.30786	0.466707	0	0	2.90694	3.4247	PHLDA1
Beriberi	1/13	0.30786	0.466707	0	0	2.90694	3.4247	TKT
Parasitic helminthiasis infectious disease	1/13	0.30786	0.466707	0	0	2.90694	3.4247	IL1B
Quadriplegia	1/13	0.30786	0.466707	0	0	2.90694	3.4247	COL6A1
Relapsing fever	1/13	0.30786	0.466707	0	0	2.90694	3.4247	CXCL13
Craniopharyngioma	1/13	0.30786	0.466707	0	0	2.90694	3.4247	CTNNB1
Dry eye syndrome	1/13	0.30786	0.466707	0	0	2.90694	3.4247	HSPG2
Transient cerebral ischemia	1/13	0.30786	0.466707	0	0	2.90694	3.4247	RPSA
Tuberculosis	1/13	0.30786	0.466707	0	0	2.90694	3.4247	CDH13
Gingival recession	1/13	0.30786	0.466707	0	0	2.90694	3.4247	IL1B
Hemiplegia	1/13	0.30786	0.466707	0	0	2.90694	3.4247	ATP1A3
Hepatic encephalopathy	1/13	0.30786	0.466707	0	0	2.90694	3.4247	DBI
Imperforate anus	1/13	0.30786	0.466707	0	0	2.90694	3.4247	KIDINS220
Keshan disease	1/13	0.30786	0.466707	0	0	2.90694	3.4247	GPX1
Koolen de Vries syndrome	1/13	0.30786	0.466707	0	0	2.90694	3.4247	MAPT
Pain agnosia	4/101	0.311332	0.470813	0	0	1.43995	1.68027	RPL34;IL1B;PNOC;AP2M1
Sensorineural hearing loss	4/103	0.323988	0.476113	0	0	1.41071	1.58994	IL1RN;RPS19;ATP1A3;ACTG1
Antley-Bixler syndrome	1/14	0.327183	0.476113	0	0	2.68319	2.99776	DHCR24
Bacterial vaginosis	1/14	0.327183	0.476113	0	0	2.68319	2.99776	IL1B
Pericarditis	1/14	0.327183	0.476113	0	0	2.68319	2.99776	IL1RN
Prostatitis	1/14	0.327183	0.476113	0	0	2.68319	2.99776	IL1B
Corneal edema	1/14	0.327183	0.476113	0	0	2.68319	2.99776	TGFBI
Cryoglobulinemia	1/14	0.327183	0.476113	0	0	2.68319	2.99776	CD81
Rett syndrome	1/14	0.327183	0.476113	0	0	2.68319	2.99776	FOXG1
Scrapie	1/14	0.327183	0.476113	0	0	2.68319	2.99776	RPSA
Enamel erosion	1/14	0.327183	0.476113	0	0	2.68319	2.99776	SMARCA4
Fibrodysplasia ossificans progressiva	1/14	0.327183	0.476113	0	0	2.68319	2.99776	GNAS
Gas gangrene	1/14	0.327183	0.476113	0	0	2.68319	2.99776	CPE
Hereditary spherocytosis	1/14	0.327183	0.476113	0	0	2.68319	2.99776	ANK2
Hyperostosis	1/14	0.327183	0.476113	0	0	2.68319	2.99776	COL6A1
Interstitial lung disease	1/14	0.327183	0.476113	0	0	2.68319	2.99776	MAPT
Kennedy's disease	1/14	0.327183	0.476113	0	0	2.68319	2.99776	DNAJA1
Common cold	2/42	0.32808	0.476295	0	0	1.74478	1.94456	IL1B;MMP9
Pancreatic cancer	5/137	0.335845	0.486424	0	0	1.32268	1.44318	LRP1;GNAS;CTNNB1;ANK2;SMARCA4
Type 2 diabetes mellitus	9/269	0.337257	0.487325	0	0	1.20946	1.31457	BTG1;SNRPN;SYT1;IL1B;IGFBP3;CDH13;AMPD3;NMNAT2;RPL6
Mitral valve insufficiency	1/15	0.345968	0.487357	0	0	2.49141	2.6444	ATP5A1
Myasthenia gravis	1/15	0.345968	0.487357	0	0	2.49141	2.6444	AGRN
Antiphospholipid syndrome	1/15	0.345968	0.487357	0	0	2.49141	2.6444	ACLY
Panic disorder	1/15	0.345968	0.487357	0	0	2.49141	2.6444	RAN
Peeling skin syndrome	1/15	0.345968	0.487357	0	0	2.49141	2.6444	RPL41
Placental insufficiency	1/15	0.345968	0.487357	0	0	2.49141	2.6444	LGALS1
Pseudohypoparathyroidism	1/15	0.345968	0.487357	0	0	2.49141	2.6444	GNAS
Shigellosis	1/15	0.345968	0.487357	0	0	2.49141	2.6444	IL1B
interleukin-7 receptor alpha deficiency	1/15	0.345968	0.487357	0	0	2.49141	2.6444	RPL5
Leptospirosis	1/15	0.345968	0.487357	0	0	2.49141	2.6444	RPLP2
McCune Albright syndrome	1/15	0.345968	0.487357	0	0	2.49141	2.6444	GNAS
Coronary artery disease	7/205	0.347834	0.488762	0	0	1.23474	1.30393	GDF15;IL1B;ALOX5AP;SPP1;HMGCR;CELSR2;MMP9
Angelman syndrome	2/44	0.34855	0.488762	0	0	1.66153	1.75121	SNRPN;IGFBP2
Hyperglycemia	4/108	0.355742	0.494999	0	0	1.34254	1.38759	SCD;IL1B;TXNIP;NR3C1
Thalassemia	2/45	0.358707	0.494999	0	0	1.6228	1.66378	GDF15;H3F3A
Gastroenteritis	2/45	0.358707	0.494999	0	0	1.6228	1.66378	NONO;PLXNA1
Aceruloplasminemia	1/16	0.364229	0.494999	0	0	2.32519	2.34838	FTL
Myotonic dystrophy type 1	1/16	0.364229	0.494999	0	0	2.32519	2.34838	CELF2
Neuromyelitis optica	1/16	0.364229	0.494999	0	0	2.32519	2.34838	DPYSL5
Oppositional defiant disorder	1/16	0.364229	0.494999	0	0	2.32519	2.34838	RTN4
Shwachman-Diamond syndrome	1/16	0.364229	0.494999	0	0	2.32519	2.34838	RPS14
Tick infestation	1/16	0.364229	0.494999	0	0	2.32519	2.34838	MAP1B
Fibromyalgia	1/16	0.364229	0.494999	0	0	2.32519	2.34838	NCAM1
Tuberous sclerosis	1/16	0.364229	0.494999	0	0	2.32519	2.34838	DCX
Variant Creutzfeldt-Jakob disease	1/16	0.364229	0.494999	0	0	2.32519	2.34838	STMN2
Varicose veins	1/16	0.364229	0.494999	0	0	2.32519	2.34838	EVL
Left ventricular noncompaction	1/16	0.364229	0.494999	0	0	2.32519	2.34838	YWHAE
Rheumatoid arthritis	10/310	0.365391	0.495487	0	0	1.16436	1.17226	FADS2;RBFOX2;RPS18;RPLP1;CELF2;KIF5A;HLA-B;HLA-A;IER3;PRRC2A
Hepatitis	2/46	0.368806	0.497929	0	0	1.58584	1.58185	CPE;TIMP1
Mastitis	2/46	0.368806	0.497929	0	0	1.58584	1.58185	MGEA5;IL1B
Agoraphobia	1/17	0.381981	0.510135	0	0	2.17976	2.09776	RGS2
Colorectal cancer	1/17	0.381981	0.510135	0	0	2.17976	2.09776	NDRG4
Conjunctivitis	1/17	0.381981	0.510135	0	0	2.17976	2.09776	PLD3
Stomatitis	1/17	0.381981	0.510135	0	0	2.17976	2.09776	HN1
Macroglobulinemia	1/17	0.381981	0.510135	0	0	2.17976	2.09776	B2M
Gilles de la Tourette syndrome	2/48	0.38881	0.518133	0	0	1.51673	1.43281	RTN4;ADD2
Encephalitis	2/49	0.398706	0.51859	0	0	1.48439	1.36494	DPYSL5;CCL3
Autistic disorder	1/18	0.399239	0.51859	0	0	2.05143	1.88362	MARCKS
Perinatal necrotizing enterocolitis	1/18	0.399239	0.51859	0	0	2.05143	1.88362	IL1B
Progressive relapsing multiple sclerosis	1/18	0.399239	0.51859	0	0	2.05143	1.88362	ATN1
Deafness dystonia syndrome	1/18	0.399239	0.51859	0	0	2.05143	1.88362	ATP1A3
Ductal carcinoma in situ	1/18	0.399239	0.51859	0	0	2.05143	1.88362	CCND1
Endocarditis	1/18	0.399239	0.51859	0	0	2.05143	1.88362	ISLR2
Thyrotoxicosis	1/18	0.399239	0.51859	0	0	2.05143	1.88362	HLA-A
Von Willebrand's disease	1/18	0.399239	0.51859	0	0	2.05143	1.88362	NONO
Kallmann syndrome	1/18	0.399239	0.51859	0	0	2.05143	1.88362	DUSP6
Lipoma	1/18	0.399239	0.51859	0	0	2.05143	1.88362	KIDINS220
Machado-Joseph disease	1/18	0.399239	0.51859	0	0	2.05143	1.88362	ATN1
Heart conduction disease	3/82	0.401939	0.521001	0	0	1.32487	1.20756	CDKN1A;ATP5G3;DCLK1
Blepharophimosis	1/19	0.416015	0.530333	0	0	1.93736	1.69913	HSPG2
Pellagra	1/19	0.416015	0.530333	0	0	1.93736	1.69913	GAPDH
Pelvic inflammatory disease	1/19	0.416015	0.530333	0	0	1.93736	1.69913	MAPT
Carney complex	1/19	0.416015	0.530333	0	0	1.93736	1.69913	GNAS
Chlamydia	1/19	0.416015	0.530333	0	0	1.93736	1.69913	IL1B
Dengue disease	1/19	0.416015	0.530333	0	0	1.93736	1.69913	SPAG9
Spinocerebellar ataxia type 2	1/19	0.416015	0.530333	0	0	1.93736	1.69913	ATN1
Glycogen storage disease	1/19	0.416015	0.530333	0	0	1.93736	1.69913	ALDOA
Attention deficit hyperactivity disorder	4/119	0.425284	0.536708	0	0	1.21344	1.03749	SYT4;NCL;MAP1B;CDH13
Substance abuse	2/52	0.427929	0.536708	0	0	1.39511	1.18416	PNOC;RTN4
Nephritis	1/20	0.432324	0.536708	0	0	1.8353	1.53905	RPS2
Osteogenesis imperfecta	1/20	0.432324	0.536708	0	0	1.8353	1.53905	SPARC
Progeria	1/20	0.432324	0.536708	0	0	1.8353	1.53905	ZMPSTE24
Congenital myasthenic syndrome	1/20	0.432324	0.536708	0	0	1.8353	1.53905	AGRN
Craniosynostosis	1/20	0.432324	0.536708	0	0	1.8353	1.53905	ZIC1
Root resorption	1/20	0.432324	0.536708	0	0	1.8353	1.53905	IL1B
Diastrophic dysplasia	1/20	0.432324	0.536708	0	0	1.8353	1.53905	RPS14
Eating disorder	1/20	0.432324	0.536708	0	0	1.8353	1.53905	RTN4
Endometritis	1/20	0.432324	0.536708	0	0	1.8353	1.53905	IL1B
Tularemia	1/20	0.432324	0.536708	0	0	1.8353	1.53905	FTL
dentatorubral-pallidoluysian atrophy	1/20	0.432324	0.536708	0	0	1.8353	1.53905	ATN1
Orofacial cleft	2/53	0.437504	0.542048	0	0	1.36768	1.13062	TTR;CADM1
Celiac disease	3/88	0.446553	0.545415	0	0	1.23097	0.992403	RGS1;TMSB4X;ZFP36L1
Autonomic neuropathy	1/21	0.448178	0.545415	0	0	1.74345	1.39923	TTR
Brain edema	1/21	0.448178	0.545415	0	0	1.74345	1.39923	MMP9
Cardiac arrest	1/21	0.448178	0.545415	0	0	1.74345	1.39923	ENO2
Congestive heart failure	1/21	0.448178	0.545415	0	0	1.74345	1.39923	GPM6A
Retinal disease	1/21	0.448178	0.545415	0	0	1.74345	1.39923	MPRIP
Syphilis	1/21	0.448178	0.545415	0	0	1.74345	1.39923	TTC3
Varicocele	1/21	0.448178	0.545415	0	0	1.74345	1.39923	CIRBP
Hypoparathyroidism	1/21	0.448178	0.545415	0	0	1.74345	1.39923	GNAS
Alzheimer's disease	6/195	0.462278	0.556488	0	0	1.10726	0.854347	CHL1;BASP1;CELF2;S100A6;NCAM1;HMGB1
Agammaglobulinemia	1/22	0.46359	0.556488	0	0	1.66034	1.2764	CD81
Nephroblastoma	1/22	0.46359	0.556488	0	0	1.66034	1.2764	BASP1
Chediak-Higashi syndrome	1/22	0.46359	0.556488	0	0	1.66034	1.2764	MYO5A
Congenital nystagmus	1/22	0.46359	0.556488	0	0	1.66034	1.2764	MSN
Gaucher's disease	1/22	0.46359	0.556488	0	0	1.66034	1.2764	PSAP
VACTERL association	1/22	0.46359	0.556488	0	0	1.66034	1.2764	KIDINS220
Alopecia areata	2/56	0.465691	0.557925	0	0	1.2915	0.987006	IER3;PRRC2A
Schizophrenia	4/126	0.46859	0.56031	0	0	1.1434	0.866728	GRIK3;AMPD3;PRRC2A;NRGN
Ameloblastoma	1/23	0.478572	0.567844	0	0	1.58479	1.16791	MMP9
Ankylosis	1/23	0.478572	0.567844	0	0	1.58479	1.16791	SPP1
Polycythemia vera	1/23	0.478572	0.567844	0	0	1.58479	1.16791	CALR
Diphtheria	1/23	0.478572	0.567844	0	0	1.58479	1.16791	EEF2
Vasculitis	2/58	0.484012	0.573197	0	0	1.24525	0.903607	IL1RN;IL1B
Amblyopia	1/24	0.493136	0.578451	0	0	1.51581	1.07163	SBK1
Gastroesophageal reflux disease	1/24	0.493136	0.578451	0	0	1.51581	1.07163	ISLR2
Hypotrichosis	1/24	0.493136	0.578451	0	0	1.51581	1.07163	RPL21
Leiomyoma	1/24	0.493136	0.578451	0	0	1.51581	1.07163	VCAN
Mastocytosis	1/24	0.493136	0.578451	0	0	1.51581	1.07163	CD63
Primary biliary cirrhosis	1/25	0.507295	0.591684	0	0	1.45257	0.985807	RPL3
Collagen disease	1/25	0.507295	0.591684	0	0	1.45257	0.985807	IL1B
Leukodystrophy	1/25	0.507295	0.591684	0	0	1.45257	0.985807	PSAP
Retinal detachment	1/26	0.521059	0.603177	0	0	1.3944	0.908998	VCAN
Glaucoma	1/26	0.521059	0.603177	0	0	1.3944	0.908998	DCLK1
Vesicoureteral reflux	1/26	0.521059	0.603177	0	0	1.3944	0.908998	MGEA5
Klinefelter's syndrome	1/26	0.521059	0.603177	0	0	1.3944	0.908998	DUSP6
Chronic obstructive pulmonary disease	4/135	0.522395	0.603591	0	0	1.06435	0.691115	APP;SNRPN;LRP1;MAPT
Kidney cancer	72/2584	0.524347	0.60377	0	0	0.998467	0.644611	TRIO;PTPRS;SERPINE2;CLTC;CLSTN1;TNC;GRIK3;CHD4;CHD3;CELSR2;PTPRF;CDH2;CCND1;CHL1;PPP2R1A;NEFM;KIF1B;KIF1A;B2M;SPTAN1;SRRM2;MEF2C;PABPC4;APLP1;ANK2;EBF3;HSPG2;MMP9;ILF3;VCAN;SFPQ;HNRNPUL1;MAP1B;CSDE1;COL6A1;MACF1;RTN1;LRP1;MAGED1;SLC1A3;CRMP1;NRXN2;RTN4;ADD2;PTPRZ1;MAP2;FLNA;TNRC18;A2M;ATP9A;SPTBN1;SPAG9;DYNC1H1;CADM1;KIDINS220;XRCC5;MYO5A;LAMB1;INHBA;L1CAM;PRRC2B;QKI;DCLK1;PRRC2A;SMARCA4;HNRNPM;F…
Influenza	3/99	0.524507	0.60377	0	0	1.0893	0.702923	IFITM3;IL1B;CCL3
Microphthalmia	1/27	0.534438	0.609517	0	0	1.3407	0.84	SOX2
Autosomal dominant cerebellar ataxia	1/27	0.534438	0.609517	0	0	1.3407	0.84	EEF2
Synovitis	1/27	0.534438	0.609517	0	0	1.3407	0.84	IL1B
Hyperandrogenism	1/27	0.534438	0.609517	0	0	1.3407	0.84	NR3C1
Keratosis	1/27	0.534438	0.609517	0	0	1.3407	0.84	SAT1
Acromegaly	1/28	0.547445	0.618633	0	0	1.29098	0.777805	IGFBP3
Age related macular degeneration	1/28	0.547445	0.618633	0	0	1.29098	0.777805	MAP2
Congenital adrenal hyperplasia	1/28	0.547445	0.618633	0	0	1.29098	0.777805	HLA-B
ENSP00000256078	1/28	0.547445	0.618633	0	0	1.29098	0.777805	CTNNB1
Lipodystrophy	1/28	0.547445	0.618633	0	0	1.29098	0.777805	ZMPSTE24
Alcohol dependence	3/103	0.551328	0.621882	0	0	1.04551	0.622525	PNOC;GRIK3;RTN4
Eosinophilia	2/66	0.553242	0.622903	0	0	1.08914	0.644727	CCL3;HSPG2
Toxic shock syndrome	1/29	0.560089	0.628318	0	0	1.24481	0.721564	IL1B
Werner syndrome	1/29	0.560089	0.628318	0	0	1.24481	0.721564	XRCC5
DOID:9917	1/30	0.57238	0.63978	0	0	1.20182	0.670557	CTNNB1
Hypopituitarism	1/30	0.57238	0.63978	0	0	1.20182	0.670557	SOX2
Gout	2/69	0.577458	0.644289	0	0	1.04021	0.571201	NRXN2;PJA2
Metabolic syndrome X	1/31	0.584329	0.646113	0	0	1.1617	0.624171	FADS2
Bronchitis	1/31	0.584329	0.646113	0	0	1.1617	0.624171	IL1B
Calcinosis	1/31	0.584329	0.646113	0	0	1.1617	0.624171	SPP1
Disease of anatomical entity	1/31	0.584329	0.646113	0	0	1.1617	0.624171	ATP9A
Fragile X syndrome	1/31	0.584329	0.646113	0	0	1.1617	0.624171	MAP1B
Otitis media	1/33	0.607235	0.669043	0	0	1.08898	0.543226	IL1B
Sarcoma	1/33	0.607235	0.669043	0	0	1.08898	0.543226	KIDINS220
Diarrhea	4/151	0.610989	0.671979	0	0	0.947715	0.466917	TPI1;TTR;IL1B;CPE
Hypoglycemia	2/74	0.615651	0.675109	0	0	0.967726	0.46942	IGFBP3;IGFBP2
Retinal degeneration	1/34	0.618211	0.675109	0	0	1.05593	0.507822	NES
Dyspepsia	1/34	0.618211	0.675109	0	0	1.05593	0.507822	SEPT3
Hypokalemia	1/34	0.618211	0.675109	0	0	1.05593	0.507822	NR3C1
Psoriasis	1/35	0.628881	0.684338	0	0	1.02482	0.475323	HLA-B
Pulmonary embolism	1/35	0.628881	0.684338	0	0	1.02482	0.475323	NONO
Huntington's disease	2/76	0.63017	0.684533	0	0	0.941474	0.434741	NTRK2;ATN1
Bilirubin metabolic disorder	1/36	0.639254	0.69318	0	0	0.995486	0.445434	PKM
Type 1 diabetes mellitus	4/158	0.646408	0.699709	0	0	0.904309	0.394571	TUBB;HLA-B;IER3;PRRC2A
Spina bifida	1/37	0.649337	0.701647	0	0	0.967784	0.417893	ZIC1
Neurofibromatosis	1/38	0.659138	0.709753	0	0	0.941579	0.392471	MSN
Constipation	1/38	0.659138	0.709753	0	0	0.941579	0.392471	KIDINS220
Alopecia	1/39	0.668666	0.713784	0	0	0.916753	0.368966	SAT1
Night blindness	1/39	0.668666	0.713784	0	0	0.916753	0.368966	PLIN2
Rickets	1/39	0.668666	0.713784	0	0	0.916753	0.368966	SPP1
Scoliosis	1/39	0.668666	0.713784	0	0	0.916753	0.368966	RPL34
Tooth agenesis	1/39	0.668666	0.713784	0	0	0.916753	0.368966	DLX1
Silver-Russell syndrome	1/40	0.677929	0.719935	0	0	0.893201	0.347199	IGFBP3
Kidney failure	1/40	0.677929	0.719935	0	0	0.893201	0.347199	IGFBP3
Macular degeneration	1/40	0.677929	0.719935	0	0	0.893201	0.347199	IER3
Nonsyndromic deafness	2/87	0.702435	0.744677	0	0	0.819171	0.289334	TNC;ACTG1
Gastritis	1/43	0.704193	0.745261	0	0	0.829272	0.290828	IL1RN
Amyotrophic lateral sclerosis	1/45	0.720504	0.756039	0	0	0.791497	0.259456	PTPRF
Beckwith-Wiedemann syndrome	1/45	0.720504	0.756039	0	0	0.791497	0.259456	GNAS
Distal arthrogryposis	1/45	0.720504	0.756039	0	0	0.791497	0.259456	MPRIP
Situs inversus	1/45	0.720504	0.756039	0	0	0.791497	0.259456	SERPINE2
Williams-Beuren syndrome	1/45	0.720504	0.756039	0	0	0.791497	0.259456	YWHAG
Skin cancer	11/454	0.72491	0.759371	0	0	0.862447	0.277456	MACF1;SYT4;VCAN;PTPRS;CHL1;TUBB3;DNER;TNC;CTNNB1;ATP1A3;ANK2
Atrial fibrillation	1/46	0.728319	0.761649	0	0	0.773868	0.245328	GAP43
Acquired metabolic disease	8/338	0.729845	0.761953	0	0	0.842402	0.265292	RPS14;DPYSL5;ZMIZ1;CHL1;HMGA1;MSMO1;MARCH6;NUDT3
Peripheral vascular disease	1/47	0.735917	0.766994	0	0	0.757006	0.232127	NRG4
Dental caries	1/49	0.750481	0.780854	0	0	0.725389	0.208216	TRIB2
Brachydactyly	1/50	0.75746	0.785466	0	0	0.710548	0.19738	GNAS
Irritable bowel syndrome	1/50	0.75746	0.785466	0	0	0.710548	0.19738	IL1B
Metabolic acidosis	1/51	0.764243	0.791171	0	0	0.696302	0.187214	RPS21
Atherosclerosis	1/52	0.770838	0.795329	0	0	0.682613	0.177669	CELSR2
Cognitive disorder	1/52	0.770838	0.795329	0	0	0.682613	0.177669	PTN
Amenorrhea	1/53	0.777248	0.796615	0	0	0.669452	0.168699	RPL24
Nicotine dependence	1/53	0.777248	0.796615	0	0	0.669452	0.168699	ATP9A
Polycystic kidney disease	1/53	0.777248	0.796615	0	0	0.669452	0.168699	CTNNB1
Syndactyly	1/53	0.777248	0.796615	0	0	0.669452	0.168699	DLX1
Hyperinsulinism	1/54	0.783479	0.801669	0	0	0.656787	0.160263	IGFBP3
Cryptorchidism	1/58	0.806712	0.824075	0	0	0.61057	0.131144	CIRBP
Crohn's disease	5/248	0.825097	0.841462	0	0	0.71436	0.137339	NDFIP1;ZMIZ1;KIF21B;YWHAZ;RHOA
Congenital heart disease	1/62	0.827456	0.842476	0	0	0.570415	0.108036	MEF2C
Pneumonia	1/64	0.836979	0.850767	0	0	0.55225	0.0982766	MMP9
Cholestasis	1/67	0.850288	0.862875	0	0	0.527066	0.0854795	IL1B
Neutropenia	1/72	0.870104	0.881534	0	0	0.489822	0.0681551	HN1
Myopia	1/75	0.880713	0.89082	0	0	0.469892	0.0596871	FLNA
Acquired immunodeficiency syndrome	1/78	0.890458	0.899202	0	0	0.451514	0.0523846	HLA-B
Blindness	1/81	0.899407	0.906755	0	0	0.434515	0.0460671	PPT1
Melanoma	10/505	0.900971	0.90685	0	0	0.698481	0.0728394	MACF1;SYT4;VCAN;PTPRS;LRP1;CHL1;DNER;TNC;CTNNB1;ANK2
Systemic lupus erythematosus	1/83	0.904964	0.909386	0	0	0.423874	0.0423281	NMNAT2
Azoospermia	1/96	0.934323	0.937362	0	0	0.365624	0.0248378	RBMX
Infertility	2/163	0.944303	0.945836	0	0	0.430783	0.0246876	SPAG9;IL1B
Carcinoma	268/11318	0.999977	0.999977	0	0	0.701843	1.6232e-05	IFITM3;RPL5;APP;TRIO;SPARC;SERPINE2;CCNI;HNRNPU;ENO2;FNBP1L;SOGA1;ACTB;SOX2;ALCAM;MPRIP;TRIM28;ZMIZ1;DPYSL5;PPP2R1A;DPYSL2;DPYSL3;BSG;KIF21B;B2M;WLS;DDX17;SRRM2;MEF2C;ISLR2;SOX11;ANK2;EBF3;HLA-A;ACTN4;HSPG2;RUFY3;MAP1B;TXNIP;TRIB2;GPM6A;MACF1;TTYH3;TTYH1;MAGED1;STXBP1;FOXG1;SDC2;SDC3;MTDH;ZMPSTE24;LDHB;ATP5B;MAP2;MAP6;TNRC18;MAP4;A2M;SPTBN1;FDFT1;B4GALNT4;CADM3;CADM1;XRCC5;NR2F1;MYO5A;L1CAM;PRRC2…

## Sheet: Allen Brain Atlas up
Term	Overlap	P-value	Adjusted P-value	Old P-value	Old Adjusted P-value	Odds Ratio	Combined Score	Genes
lower dorsal lateral hypothalamic area	28/301	2.86257e-08	5.81818e-05	0	0	3.70953	64.4307	CD63;CD81;USP11;GNAI2;PCSK1N;DPYSL2;PEG10;NNAT;NCAM1;RPS27A;AP2M1;RPS12;VAT1;RPS8;RPL13A;RPL35A;RPS25;RPS28;PKIA;PNOC;RPL37A;FXYD6;TMBIM6;EVL;MAPT;TKT;PFDN5;RPS24
Bed nuclei of the stria terminalis, anterior division, magnocellular nucleus	27/301	1.07099e-07	5.81818e-05	0	0	3.5571	57.0896	MAGED1;SDC2;USP11;GNAI2;RPS15;PCSK1N;RPS19;PEG10;DNER;NNAT;RPL14;NCAM1;RPS27A;RPS12;VAT1;CADM1;RPS7;APLP1;CIRBP;RPL13A;GAP43;PNOC;FXYD6;MAPT;RPS21;PFDN5;RPS24
Paraventricular hypothalamic nucleus	27/301	1.07099e-07	5.81818e-05	0	0	3.5571	57.0896	GPM6A;RPL10;SDC2;USP11;SLC1A3;HMP19;GNAI2;SOX2;FADS2;PCSK1N;PEG10;NNAT;RPS3;RPL35;RPS2;RPS12;RPL19;VAT1;CADM1;HSPA5;RPS8;USP22;LAPTM5;L1CAM;GAP43;CANX;FXYD6
Paraventricular hypothalamic nucleus, parvicellular division	27/301	1.07099e-07	5.81818e-05	0	0	3.5571	57.0896	GPM6A;RPL10;SDC2;USP11;SLC1A3;HMP19;GNAI2;SOX2;FADS2;PCSK1N;PEG10;NNAT;RPS3;RPL35;RPS2;RPS12;RPL19;VAT1;CADM1;HSPA5;RPS8;USP22;LAPTM5;L1CAM;GAP43;CANX;FXYD6
periventricular stratum of PO2	26/301	3.84705e-07	0.000167193	0	0	3.4063	50.3138	RPL5;DLX1;MAGED1;SDC2;RGS16;USP11;GNAI2;PCSK1N;RPS19;PEG10;NNAT;RPL14;RPS2;RPS12;RPL19;VAT1;MARCKSL1;CADM1;RPS7;APLP1;PNOC;CANX;HNRNPD;FXYD6;RPS21;ITM2C
Medial preoptic nucleus	31/410	5.68919e-07	0.000206043	0	0	2.95871	42.5449	DLX1;MAGED1;SDC2;RGS16;USP11;GNAI2;RPS15;PCSK1N;RPS19;PEG10;NNAT;DNER;RPL14;RPS11;RPL19;RPS12;VAT1;MARCKSL1;FCER1G;CADM1;RPS7;APLP1;EEF1A1;SFPQ;VGF;PNOC;CANX;HNRNPD;GNAS;FXYD6;RPS21
Bed nuclei of the stria terminalis, posterior division, interfascicular nucleus	25/301	1.32514e-06	0.00035994	0	0	3.25713	44.082	MAGED1;SDC2;USP11;GRIK3;GNAI2;RPS15;RGS2;PCSK1N;PEG10;PEA15;NNAT;NCAM1;RPS27A;SOX4;VAT1;GPX1;CADM1;NR2F1;RPL13A;GAP43;PNOC;FXYD6;MAPT;RPS21;XPR1
Paraventricular hypothalamic nucleus, parvicellular division, anterior parvicellular part	25/301	1.32514e-06	0.00035994	0	0	3.25713	44.082	GPM6A;RPL30;RPL10;SDC2;USP11;SDC3;HMP19;GNAI2;SOX2;FADS2;PCSK1N;PEG10;NNAT;RPS3;RPL35;RPL13;RPS12;VAT1;MARCKSL1;CADM1;HSPA5;USP22;L1CAM;GAP43;FXYD6
Bed nuclei of the stria terminalis, anterior division, dorsomedial nucleus	24/301	4.37152e-06	0.000949931	0	0	3.10956	38.3732	VAT1;GPX1;RPL10;MAGED1;SDC2;USP11;CIRBP;GNAI2;FADS2;GAP43;PEG10;IL1B;PNOC;PEA15;NNAT;RPL14;RPL13;FXYD6;RPS27A;RPS21;PFDN5;VAMP2;XPR1;RPS12
paraventricular nucleus, dorsal part	24/301	4.37152e-06	0.000949931	0	0	3.10956	38.3732	VAT1;CADM1;RPL10;HSPA5;SDC2;USP11;SDC3;L1CAM;GNAI2;SOX2;FADS2;PCSK1N;GAP43;CDH2;PEG10;NNAT;RPS3;RPL35;RPL13;FXYD6;NCAM1;RPS2;RPS12;RPL19
Bed nuclei of the stria terminalis, anterior division, anteromedial area	23/301	1.37928e-05	0.00176305	0	0	2.96357	33.1664	SYT4;SERPINE2;CADM1;USP11;CRABP1;SLC1A3;GNAI2;SOX2;RGS2;GAP43;PEG10;PNOC;PEA15;COL6A1;NNAT;S100A6;DCX;RPS2;RPS21;VAMP2;DBN1;XPR1;ITM2C
Bed nuclei of the stria terminalis, posterior division, transverse nucleus	23/301	1.37928e-05	0.00176305	0	0	2.96357	33.1664	VAT1;SET;CADM1;USP11;NR2F1;PLAUR;RPL13A;RPL35A;GNAI2;RPS15;RGS2;PCSK1N;PEG10;PNOC;PEA15;TTC3;CTNNB1;FXYD6;NCAM1;RPS21;PFDN5;SOX4;XPR1
Dopaminergic A13 group	23/301	1.37928e-05	0.00176305	0	0	2.96357	33.1664	RPL31;RPS8;USP11;RPL13A;L1CAM;GNAI2;FADS2;PCSK1N;GAP43;DPYSL2;PNOC;CANX;NNAT;RPL14;RPL13;FXYD6;MAPT;RPS11;TKT;RPS27A;PFDN5;XPR1;RPS12
Medial preoptic nucleus, medial part	23/301	1.37928e-05	0.00176305	0	0	2.96357	33.1664	DLX1;MARCKSL1;FCER1G;CADM1;RPS7;MAGED1;SDC2;RGS16;SOX2;EEF1A1;PCSK1N;SFPQ;RPS16;DPYSL5;PEG10;CANX;NNAT;GNAS;FXYD6;RPS11;RPS12;ITM2C;RPL19
Paraventricular hypothalamic nucleus, descending division	23/301	1.37928e-05	0.00176305	0	0	2.96357	33.1664	RPL30;USP11;RPL13A;L1CAM;GNAI2;FADS2;PCSK1N;GAP43;DPYSL2;PNOC;CANX;NNAT;RPL14;RPL13;FXYD6;MAPT;RPS11;TKT;RPS27A;RPS21;PFDN5;XPR1;RPS12
Paraventricular hypothalamic nucleus, magnocellular division	23/301	1.37928e-05	0.00176305	0	0	2.96357	33.1664	RPL30;GPX1;CADM1;RPL10;HSPA5;RPL23;USP11;GNAI2;FADS2;RGS2;PCSK1N;RPS19;DPYSL5;PEG10;CANX;NNAT;RPL14;RPL35;FXYD6;RPS2;RPS11;RPS12;RPL19
Paraventricular hypothalamic nucleus, magnocellular division, medial magnocellular part	23/301	1.37928e-05	0.00176305	0	0	2.96357	33.1664	RPL30;GPX1;CADM1;RPL10;HSPA5;RPL23;USP11;GNAI2;EEF1A1;FADS2;RGS2;PCSK1N;RPS19;PEG10;CANX;RPL37A;NNAT;RPL14;RPL35;FXYD6;RPS2;RPS12;RPL19
Medial preoptic area	22/301	4.15619e-05	0.00347362	0	0	2.81914	28.4404	VAT1;DLX1;MARCKSL1;CADM1;RPL10;RPS7;MAGED1;SDC2;USP11;GNAI2;EEF1A1;RPS25;PCSK1N;PEG10;PNOC;DNER;CANX;NNAT;TXNIP;FXYD6;RPS21;RPS12
Paraventricular hypothalamic nucleus, descending division, lateral parvicellular part	22/301	4.15619e-05	0.00347362	0	0	2.81914	28.4404	RPL30;USP11;RPL13A;L1CAM;GNAI2;FADS2;PCSK1N;GAP43;DPYSL2;CANX;NNAT;RPL14;RPL13;FXYD6;MAPT;RPS11;TKT;RPS27A;RPS21;PFDN5;XPR1;RPS12
Paraventricular hypothalamic nucleus, magnocellular division, posterior magnocellular part	22/301	4.15619e-05	0.00347362	0	0	2.81914	28.4404	RPL4;CADM1;RPL10;HSPA5;RPL23;LAPTM5;GNAI2;FADS2;MORF4L1;PCSK1N;RPS19;DPYSL5;PEG10;CANX;NNAT;RPL14;RPL35;FXYD6;RPS2;RPS11;RPS12;RPL19
Paraventricular hypothalamic nucleus, magnocellular division, posterior magnocellular part, lateral zone	22/301	4.15619e-05	0.00347362	0	0	2.81914	28.4404	RPL4;CADM1;RPL10;HSPA5;RPL23;LAPTM5;GNAI2;FADS2;MORF4L1;PCSK1N;RPS19;DPYSL5;PEG10;CANX;NNAT;RPL14;RPL35;FXYD6;RPS2;RPS11;RPS12;RPL19
Posterodorsal preoptic nucleus	22/301	4.15619e-05	0.00347362	0	0	2.81914	28.4404	GPX1;CADM1;MAGED1;SDC2;USP11;APLP1;RPL13A;PCSK1N;GAP43;RPS19;PEG10;PNOC;PEA15;DNER;NNAT;RPL14;RPL13;FXYD6;RPS27A;PFDN5;XPR1;RPS12
nucleus of the stria terminalis, medial division, anterior part	22/301	4.15619e-05	0.00347362	0	0	2.81914	28.4404	TOP2A;SYT4;CADM1;USP11;GRIK3;SLC1A3;GNAI2;SOX2;SFPQ;ALCAM;PEG10;PNOC;ZIC1;COL6A1;NNAT;S100A6;DCX;RPS2;RPS21;DBN1;XPR1;ITM2C
paraventricular nucleus, rostral part	22/301	4.15619e-05	0.00347362	0	0	2.81914	28.4404	VAT1;SYT4;CADM1;RPL31;SDC2;USP11;LAPTM5;SLC1A3;GNAI2;FADS2;PCSK1N;GAP43;DPYSL5;PEG10;CANX;NNAT;SNCG;FXYD6;RPS2;RPS11;RPS12;RPL19
periventricular stratum of SeDg	22/301	4.15619e-05	0.00347362	0	0	2.81914	28.4404	TOP2A;SYT4;CADM1;USP11;GRIK3;SLC1A3;GNAI2;SOX2;SFPQ;ALCAM;PEG10;PNOC;ZIC1;COL6A1;NNAT;S100A6;DCX;RPS2;RPS21;DBN1;XPR1;ITM2C
upper dorsal perifornical nucleus	22/301	4.15619e-05	0.00347362	0	0	2.81914	28.4404	VAT1;GPM6A;SYT4;GPX1;CADM1;USP11;GNAI2;RPS15;EEF1G;RGS2;PCSK1N;DPYSL2;PEG10;PNOC;NNAT;HNRNPD;FXYD6;TMBIM6;NCAM1;MAPT;RPS21;AP2M1
Bed nuclei of the stria terminalis, posterior division, principal nucleus	21/301	0.000119423	0.00837115	0	0	2.67626	24.1742	GPX1;CADM1;USP11;GNAI2;SOX2;EEF1A1;RGS2;GAP43;PEG10;PNOC;PEA15;NNAT;RPS3;FXYD6;RPS2;RPS21;SOX4;VAMP2;DBN1;XPR1;ITM2C
Paraventricular hypothalamic nucleus, parvicellular division, medial parvicellular part, dorsal zone	21/301	0.000119423	0.00837115	0	0	2.67626	24.1742	VAT1;CADM1;RPL10;LAPTM5;GNAI2;FADS2;PCSK1N;GAP43;PEG10;CANX;NNAT;RPS3;RPL35;SNCG;FXYD6;NCAM1;RPS2;RPS11;TKT;RPS12;RPL19
bed nucleus of the stria terminalis, medioseptal division	21/301	0.000119423	0.00837115	0	0	2.67626	24.1742	TOP2A;SYT4;CADM1;USP11;GRIK3;SLC1A3;GNAI2;SOX2;SFPQ;ALCAM;PEG10;ZIC1;COL6A1;NNAT;S100A6;DCX;RPS2;RPS21;DBN1;XPR1;ITM2C
paraventricular nucleus, cap part	21/301	0.000119423	0.00837115	0	0	2.67626	24.1742	RPL30;CADM1;RPL10;HSPA5;CD81;RPS8;LAPTM5;GNAI2;FADS2;MORF4L1;PCSK1N;GAP43;PEG10;CANX;NNAT;RPL14;FXYD6;RPS2;RPS11;RPS12;RPL19
periventricular stratum of PO1	21/301	0.000119423	0.00837115	0	0	2.67626	24.1742	VAT1;SYT4;MARCKSL1;CADM1;RPL10;RPS7;MAGED1;SDC2;RGS16;USP11;SLC1A3;GNAI2;GAP43;PEG10;PNOC;DNER;NNAT;TXNIP;FXYD6;RPS21;RPS12
Bed nuclei of the stria terminalis, posterior division	20/301	0.000326673	0.0177465	0	0	2.53489	20.3464	GPX1;CADM1;SDC2;USP11;NR2F1;GNAI2;RGS2;PCSK1N;GAP43;PEG10;PNOC;NNAT;RPS3;FXYD6;RPS2;RPS21;SOX4;VAMP2;XPR1;ITM2C
Periventricular region	20/301	0.000326673	0.0177465	0	0	2.53489	20.3464	VAT1;CD63;DLX1;MARCKSL1;CADM1;SDC2;USP11;SOX11;GNAI2;RPS25;PCSK1N;PEG10;PNOC;NNAT;TXNIP;FXYD6;TIMP1;RPS21;RPS12;RPL19
dorsal tuberomammillary nucleus, intermediate part (histaminergic)	20/301	0.000326673	0.0177465	0	0	2.53489	20.3464	H2AFY;RPS8;SDC2;USP22;EBF3;SOX11;GNAI2;SOX2;EEF1G;RPS25;PCSK1N;YWHAQ;DPYSL5;PEG10;NNAT;FXYD6;TIMP1;VIM;RPS11;RPS12
dorsomedial preoptic area, intermediate part	20/301	0.000326673	0.0177465	0	0	2.53489	20.3464	VAT1;CADM1;RPS7;MAGED1;SDC2;USP11;CIRBP;GNAI2;RPS15;GAP43;NRG4;PEG10;PNOC;DNER;NNAT;HNRNPD;FXYD6;RPS27A;RPS21;RPS12
intermediate stratum of PHyB-V	20/301	0.000326673	0.0177465	0	0	2.53489	20.3464	H2AFY;RPS8;SDC2;USP22;EBF3;SOX11;GNAI2;SOX2;EEF1G;RPS25;PCSK1N;YWHAQ;DPYSL5;PEG10;NNAT;FXYD6;TIMP1;VIM;RPS11;RPS12
mantle zone of PSPa	20/301	0.000326673	0.0177465	0	0	2.53489	20.3464	VAT1;SYT4;CD81;SDC2;USP11;RPL35A;GNAI2;RPS15;RPS25;PCSK1N;PEG10;PNOC;NNAT;FXYD6;TMBIM6;NCAM1;MAPT;TKT;RPS21;PFDN5
paraventricular nucleus, peduncular or principal part	20/301	0.000326673	0.0177465	0	0	2.53489	20.3464	VAT1;CADM1;RPL10;HSPA5;SDC2;USP11;SLC1A3;HMP19;GNAI2;SOX2;FADS2;PCSK1N;GAP43;PEG10;CANX;NNAT;FXYD6;RPS2;RPS12;RPL19
periventricular stratum of PPaA	20/301	0.000326673	0.0177465	0	0	2.53489	20.3464	VAT1;CADM1;RPL10;HSPA5;SDC2;USP11;SLC1A3;HMP19;GNAI2;SOX2;FADS2;PCSK1N;GAP43;PEG10;CANX;NNAT;FXYD6;RPS2;RPS12;RPL19
preoptic area	20/301	0.000326673	0.0177465	0	0	2.53489	20.3464	VAT1;MARCKSL1;CADM1;RPS7;MAGED1;SDC2;RGS16;USP11;GNAI2;RPS15;PCSK1N;NRG4;PEG10;PNOC;DNER;NNAT;TXNIP;FXYD6;RPS21;RPS12
Anterodorsal preoptic nucleus	19/301	0.000849199	0.0318157	0	0	2.39503	16.9358	IFITM3;VAT1;SYT4;RTN1;CADM1;RPL10;MAGED1;RPL23;USP11;GNAI2;GAP43;PEG10;PNOC;PEA15;DNER;NNAT;RPL13;FXYD6;RPS12
Bed nuclei of the stria terminalis	19/301	0.000849199	0.0318157	0	0	2.39503	16.9358	SERPINE2;CADM1;USP11;CRABP1;GNAI2;RGS2;GAP43;PEG10;PNOC;COL6A1;NNAT;RPS3;S100A6;RPS2;RPS21;SOX4;VAMP2;XPR1;ITM2C
Dorsomedial nucleus of the hypothalamus, anterior part	19/301	0.000849199	0.0318157	0	0	2.39503	16.9358	VAT1;RPL10;RPL31;RPS8;SDC2;USP22;APLP1;SOX11;GNAI2;SOX2;PCSK1N;PEG10;NNAT;FXYD6;TIMP1;VIM;RPS11;PFDN5;RPS12
Pallidum, caudal region	19/301	0.000849199	0.0318157	0	0	2.39503	16.9358	SERPINE2;CADM1;USP11;CRABP1;GNAI2;RGS2;GAP43;PEG10;PNOC;COL6A1;NNAT;RPS3;S100A6;RPS2;RPS21;SOX4;VAMP2;XPR1;ITM2C
Posterior hypothalamic nucleus	19/301	0.000849199	0.0318157	0	0	2.39503	16.9358	RAB3C;H2AFY;CD81;RPS8;SDC2;USP22;EBF3;SOX11;PCSK1N;DPYSL5;DNER;RPL37A;FXYD6;NCAM1;TIMP1;MAPT;TKT;PFDN5;RPS24
dorsal septopreoptic nucleus	19/301	0.000849199	0.0318157	0	0	2.39503	16.9358	VAT1;SYT4;CADM1;RPL10;MAGED1;SDC2;USP11;SLC1A3;GNAI2;GAP43;PEG10;PNOC;DNER;CANX;NNAT;TXNIP;FXYD6;RPS21;RPS12
intermediate stratum of PSPa	19/301	0.000849199	0.0318157	0	0	2.39503	16.9358	VAT1;CD81;SDC2;USP11;RPL35A;GNAI2;RPS15;RPS25;PCSK1N;PEG10;NNAT;FXYD6;TMBIM6;NCAM1;MAPT;TKT;RPS27A;PFDN5;RPS12
mantle zone of PO2	19/301	0.000849199	0.0318157	0	0	2.39503	16.9358	VAT1;DLX1;MARCKSL1;CADM1;RPS7;SDC2;RGS16;USP11;GNAI2;RPS15;PCSK1N;RPS19;PEG10;PNOC;NNAT;FXYD6;RPS21;RPS12;RPL19
medial part of MPO	19/301	0.000849199	0.0318157	0	0	2.39503	16.9358	MARCKSL1;CADM1;RPS7;MAGED1;RPL23;SDC2;RGS16;USP11;PCSK1N;RPS19;PEG10;CANX;NNAT;RPL14;GNAS;FXYD6;RPS2;RPS12;RPL19
paraventricular nucleus, lateral part	19/301	0.000849199	0.0318157	0	0	2.39503	16.9358	RPS7;MAGED1;USP11;RPL35A;GNAI2;RPS15;RPS25;PCSK1N;DPYSL2;PEG10;PNOC;NNAT;HNRNPD;RPL14;FXYD6;MAPT;RPS27A;PFDN5;RPS12
peduncular subparaventricular area	19/301	0.000849199	0.0318157	0	0	2.39503	16.9358	VAT1;SYT4;CD81;SDC2;USP11;RPL35A;GNAI2;RPS15;RPS25;PCSK1N;PEG10;NNAT;FXYD6;TMBIM6;NCAM1;MAPT;TKT;RPS21;PFDN5
posterior part of anterior hypothalamic nucleus	19/301	0.000849199	0.0318157	0	0	2.39503	16.9358	VAT1;HSP90AA1;RPL31;RPS8;SDC2;USP11;GNAI2;EEF1G;PCSK1N;GAP43;DPYSL5;PEG10;NNAT;SNCG;FXYD6;TIMP1;RPS11;PFDN5;RPS12
preoptic alar plate	19/301	0.000849199	0.0318157	0	0	2.39503	16.9358	VAT1;MARCKSL1;CADM1;RPS7;SDC2;RGS16;USP11;GNAI2;RPS15;PCSK1N;NRG4;PEG10;PNOC;NNAT;TXNIP;FXYD6;UBA1;RPS21;RPS12
preoptic telencephalon	19/301	0.000849199	0.0318157	0	0	2.39503	16.9358	VAT1;MARCKSL1;CADM1;RPS7;SDC2;RGS16;USP11;GNAI2;RPS15;PCSK1N;NRG4;PEG10;PNOC;NNAT;TXNIP;FXYD6;UBA1;RPS21;RPS12
reuniens nucleus, main part	19/301	0.000849199	0.0318157	0	0	2.39503	16.9358	RAB3C;RGS16;STMN2;LAPTM5;L1CAM;SOX2;GAP43;RIMS3;GNG2;CDH2;DPYSL5;DPYSL3;ZIC1;CTNNB1;EVL;MAPT;AGRN;AP2M1;CLASP2
second (ventral) preoptic domain	19/301	0.000849199	0.0318157	0	0	2.39503	16.9358	VAT1;DLX1;MARCKSL1;CADM1;RPS7;SDC2;RGS16;USP11;GNAI2;RPS15;PCSK1N;RPS19;PEG10;PNOC;NNAT;FXYD6;RPS21;RPS12;RPL19
upper basal lateral hypothalamic area	19/301	0.000849199	0.0318157	0	0	2.39503	16.9358	VAT1;TSC22D1;CD81;RPL35A;EBF3;GNAI2;RPS25;RPS28;PCSK1N;PEG10;PKIA;RPL37A;FXYD6;TMBIM6;MAPT;TKT;PHLDA1;PFDN5;AP2M1
upper basal perifornical nucleus	19/301	0.000849199	0.0318157	0	0	2.39503	16.9358	VAT1;CADM1;RPS7;MAGED1;SDC2;APLP1;RPL35A;SOX11;GNAI2;RPS15;PCSK1N;PEG10;DNER;NNAT;HNRNPD;RPL14;RPS27A;PFDN5;RPS12
Bed nuclei of the stria terminalis, anterior division, ventral nucleus	18/301	0.00209394	0.0606685	0	0	2.25665	13.9206	VAT1;CADM1;USP11;GRIK3;RPL13A;SMARCA4;GNAI2;RPS15;PCSK1N;PEG10;PNOC;NNAT;FXYD6;NCAM1;MAPT;RPS21;SOX4;AP2M1
Dorsomedial nucleus of the hypothalamus	18/301	0.00209394	0.0606685	0	0	2.25665	13.9206	VAT1;DLX1;SDC2;USP22;CRABP1;SOX11;GNAI2;SOX2;PCSK1N;RPS19;CDH2;PEG10;NNAT;FXYD6;TIMP1;VIM;PFDN5;RPS12
Dorsomedial nucleus of the hypothalamus, posterior part	18/301	0.00209394	0.0606685	0	0	2.25665	13.9206	VAT1;DLX1;NTRK2;SDC2;USP22;SOX11;GNAI2;SOX2;PCSK1N;RPS19;CDH2;PEG10;NNAT;FXYD6;TIMP1;VIM;PFDN5;RPS12
Nucleus of reunions	18/301	0.00209394	0.0606685	0	0	2.25665	13.9206	RAB3C;RPL10;RGS16;USP22;LAPTM5;L1CAM;GNAI2;SOX2;FADS2;GAP43;RIMS3;CDH2;DPYSL5;ZIC1;CTNNB1;EVL;AGRN;AP2M1
Parastrial nucleus	18/301	0.00209394	0.0606685	0	0	2.25665	13.9206	CADM1;RPS7;MAGED1;USP11;CIRBP;GNAI2;RPS15;GAP43;RGS1;NRG4;PEG10;PNOC;NNAT;FXYD6;MAPT;RPS27A;RPS21;RPS12
Subparaventricular zone	18/301	0.00209394	0.0606685	0	0	2.25665	13.9206	DLX1;CADM1;RPL10;RGS16;USP11;CRABP1;PRRC2B;GNAI2;SOX2;PCSK1N;TUBA1A;PEG10;NNAT;HNRNPD;GNAS;TXNIP;FXYD6;TMBIM6
core of T-DMH	18/301	0.00209394	0.0606685	0	0	2.25665	13.9206	CD63;DLX1;GRN;MARCKSL1;SDC2;CRABP1;MSN;SOX11;GNAI2;PCSK1N;TRIM28;CDH2;PEG10;GNAS;RPS2;VIM;RPS12;RPL19
first (dorsal) preoptic domain	18/301	0.00209394	0.0606685	0	0	2.25665	13.9206	VAT1;MARCKSL1;CADM1;RPS7;MAGED1;SDC2;USP11;GNAI2;RPS15;NRG4;PEG10;PNOC;DNER;NNAT;TXNIP;FXYD6;RPS21;RPS12
intermediate stratum of PHyB-D	18/301	0.00209394	0.0606685	0	0	2.25665	13.9206	VAT1;RPS7;SDC2;USP11;APLP1;RPL35A;GNAI2;RPS15;RPS25;PCSK1N;PEG10;DNER;NNAT;HNRNPD;FXYD6;TMBIM6;PFDN5;RPS12
lateral part of MPO	18/301	0.00209394	0.0606685	0	0	2.25665	13.9206	VAT1;CADM1;MAGED1;SDC2;USP11;CIRBP;RPL13A;RPS15;PCSK1N;RPS19;PEG10;PNOC;NNAT;HNRNPD;RPL14;FXYD6;RPS21;RPS12
mantle zone of PO1	18/301	0.00209394	0.0606685	0	0	2.25665	13.9206	VAT1;MARCKSL1;CADM1;RPS7;MAGED1;SDC2;USP11;GNAI2;RPS15;NRG4;PEG10;PNOC;DNER;NNAT;TXNIP;FXYD6;RPS21;RPS12
mantle zone of PPaA	18/301	0.00209394	0.0606685	0	0	2.25665	13.9206	VAT1;SYT4;GPX1;CADM1;USP11;RPL11;GNAI2;RPS15;EEF1G;PCSK1N;PEG10;PNOC;NNAT;RPS3;FXYD6;TMBIM6;NCAM1;RPS21
peduncular paraventricular area of PHyA	18/301	0.00209394	0.0606685	0	0	2.25665	13.9206	VAT1;SYT4;GPX1;CADM1;USP11;RPL11;GNAI2;RPS15;EEF1G;PCSK1N;PEG10;PNOC;NNAT;RPS3;FXYD6;TMBIM6;NCAM1;RPS21
periventricular stratum of p3ZL	18/301	0.00209394	0.0606685	0	0	2.25665	13.9206	RAB3C;RPL10;RPS8;USP22;LAPTM5;L1CAM;GNAI2;SOX2;EEF1G;FADS2;GAP43;DPYSL5;CANX;FXYD6;EVL;TKT;AGRN;PFDN5
posterobasal nucleus, intermediate part	18/301	0.00209394	0.0606685	0	0	2.25665	13.9206	VAT1;RPL10;RPS7;SDC2;USP11;APLP1;GNAI2;RPS15;RPS25;PCSK1N;PEG10;DNER;NNAT;FXYD6;TMBIM6;TIMP1;PFDN5;RPS12
shell of p3ZL	18/301	0.00209394	0.0606685	0	0	2.25665	13.9206	RAB3C;RPL10;RPS8;USP22;LAPTM5;L1CAM;GNAI2;SOX2;EEF1G;FADS2;GAP43;DPYSL5;CANX;FXYD6;EVL;TKT;AGRN;PFDN5
terminal nucleus of the stria medullaris	18/301	0.00209394	0.0606685	0	0	2.25665	13.9206	VAT1;SYT4;MARCKSL1;GPX1;CADM1;SDC2;USP11;GRIK3;GNAI2;PCSK1N;PEG10;PNOC;CANX;NNAT;FXYD6;NCAM1;RPS21;XPR1
alar part of peduncular hypothalamus	17/301	0.00488784	0.126444	0	0	2.11974	11.2792	VAT1;GPX1;CD81;USP11;RPL11;GNAI2;RPS15;EEF1G;PEG10;PNOC;NNAT;RPS3;FXYD6;TMBIM6;NCAM1;RPS21;RPS12
dorsal part of PHyB	17/301	0.00488784	0.126444	0	0	2.11974	11.2792	VAT1;RPS7;SDC2;USP11;RPL35A;GNAI2;RPS15;RPS25;PCSK1N;PEG10;NNAT;FXYD6;TMBIM6;NCAM1;RPS21;PFDN5;RPS12
dorsomedial part of VMH	17/301	0.00488784	0.126444	0	0	2.11974	11.2792	VAT1;RPL5;DLX1;RPL10;SDC2;CRABP1;RPL35A;SOX11;GNAI2;PCSK1N;TRIM28;CDH2;PEG10;HNRNPD;TXNIP;VIM;RPS12
layer 3 of AOV cortex	17/301	0.00488784	0.126444	0	0	2.11974	11.2792	TOP2A;YWHAE;NTRK2;IL1RN;MARCKSL1;FOXG1;NR2F1;CRMP1;SOX11;PTN;INHBA;DUSP6;COL6A1;DCX;GPC2;SOX4;VAMP2
magnocellular (medial) subparafascicular nucleus	17/301	0.00488784	0.126444	0	0	2.11974	11.2792	IFITM3;MARCKSL1;SDC2;RGS16;EBF3;NMNAT2;INHBA;LSS;EEF1G;SQLE;MORF4L1;YWHAQ;SCRN1;DPYSL5;IL1B;PNOC;CDH13
mantle zone of PHyB-D	17/301	0.00488784	0.126444	0	0	2.11974	11.2792	VAT1;RPS7;SDC2;USP11;RPL35A;GNAI2;RPS15;RPS25;PCSK1N;PEG10;NNAT;FXYD6;TMBIM6;NCAM1;RPS21;PFDN5;RPS12
peduncular part of dorsomedial hypothalamic nucleus	17/301	0.00488784	0.126444	0	0	2.11974	11.2792	RPS8;SDC2;USP22;SOX11;GNAI2;SOX2;PCSK1N;RPS19;CDH2;PEG10;RPL37A;NNAT;FXYD6;TIMP1;VIM;PFDN5;RPS12
periventricular stratum of VTTh	17/301	0.00488784	0.126444	0	0	2.11974	11.2792	IFITM3;MARCKSL1;SDC2;RGS16;EBF3;NMNAT2;INHBA;LSS;EEF1G;SQLE;MORF4L1;YWHAQ;SCRN1;DPYSL5;IL1B;PNOC;CDH13
striohypothalamic nucleus	17/301	0.00488784	0.126444	0	0	2.11974	11.2792	VAT1;CADM1;USP11;CIRBP;RPL13A;GNAI2;RPS15;PCSK1N;PEG10;PNOC;NNAT;HNRNPD;FXYD6;NCAM1;MAPT;RPS21;PFDN5
Suprachiasmatic nucleus	19/370	0.00824135	0.210688	0	0	1.91728	9.20026	DLX1;GRN;RGS16;USP11;CRABP1;CXCL13;GNAI2;ILF3;TUBA1A;VGF;RGS1;PEG10;NNAT;HNRNPD;GNAS;TXNIP;TIMP1;RPS12;RPL19
Anteroventral periventricular nucleus	16/301	0.0107786	0.223065	0	0	1.98428	8.98919	VAT1;RPL5;DLX1;MARCKSL1;FCER1G;RPS7;RGS16;CXCL13;PCSK1N;PEG10;PNOC;NNAT;TXNIP;RPS11;RPS12;RPL19
Bed nuclei of the stria terminalis, anterior division	16/301	0.0107786	0.223065	0	0	1.98428	8.98919	SERPINE2;CADM1;USP11;CRABP1;GNAI2;SOX2;RGS2;GAP43;PEG10;PNOC;COL6A1;NNAT;S100A6;DCX;RPS21;ITM2C
Lateral septal nucleus, ventral part	16/301	0.0107786	0.223065	0	0	1.98428	8.98919	DLX1;SYT4;CADM1;GRIK3;SLC1A3;GNAI2;SOX2;RGS2;PEG10;PNOC;ZIC1;NNAT;RPS2;DBN1;XPR1;ITM2C
Lingula (I), molecular layer	16/301	0.0107786	0.223065	0	0	1.98428	8.98919	CD63;CD82;GDF15;IGFBP3;IGFBP2;ITGB2;DBI;TREM2;AMPD3;FADS2;TXNIP;FLNA;A2M;CTSD;TPT1;WLS
Nucleus of the solitary tract, commissural part	16/301	0.0107786	0.223065	0	0	1.98428	8.98919	VAT1;APC2;GPX1;IGFBP3;MSN;PRDX6;YWHAZ;ACLY;FASN;PPT1;TAGLN2;PLIN2;LCP1;A2M;S100A10;PRPH
PcPV part of the periaqueductal gray	16/301	0.0107786	0.223065	0	0	1.98428	8.98919	IFITM3;MARCKSL1;TNC;SOX11;NMNAT2;INHBA;ATP5G3;SEPT3;EEF1G;SQLE;YWHAQ;DPYSL5;DPYSL2;RPL27A;PNOC;RPL13
Subparafascicular area	16/301	0.0107786	0.223065	0	0	1.98428	8.98919	IFITM3;SDC2;RGS16;EBF3;NMNAT2;INHBA;LSS;SOX2;EEF1G;MORF4L1;YWHAQ;SCRN1;DPYSL5;PNOC;CDH13;PFDN5
Subparafascicular nucleus, magnocellular part	16/301	0.0107786	0.223065	0	0	1.98428	8.98919	IFITM3;RAB3C;RPS8;SDC2;RGS16;USP22;EBF3;HSPG2;EEF1G;YWHAQ;SCRN1;DPYSL5;PNOC;IDS;EVL;PFDN5
central part of VMH	16/301	0.0107786	0.223065	0	0	1.98428	8.98919	RPL5;DLX1;FCER1G;RPS7;SDC2;CRABP1;STMN3;RPL35A;GNAI2;PCSK1N;RPS19;TRIM28;CDH2;PEG10;HNRNPD;RPS12
core of P-DMH	16/301	0.0107786	0.223065	0	0	1.98428	8.98919	DLX1;GRN;RPL10;SDC2;USP22;SOX11;GNAI2;SOX2;PCSK1N;CDH2;PEG10;NNAT;FXYD6;TIMP1;VIM;RPS12
intermediate stratum of DgSe	16/301	0.0107786	0.223065	0	0	1.98428	8.98919	DDX17;SYT4;CADM1;USP11;GNAI2;SOX2;ALCAM;PEG10;PNOC;ZIC1;COL6A1;NNAT;DCX;FXYD6;NCAM1;RPS21
intermediate stratum of PHyB-I	16/301	0.0107786	0.223065	0	0	1.98428	8.98919	VAT1;CD81;SDC2;SOX11;GNAI2;PCSK1N;CDH2;PEG10;DNER;RPL37A;NNAT;FXYD6;TIMP1;TKT;PFDN5;RPS12
intermediate stratum of POH	16/301	0.0107786	0.223065	0	0	1.98428	8.98919	VAT1;DLX1;MARCKSL1;CADM1;RGS16;USP11;CIRBP;CXCL13;RPS15;PCSK1N;PEG10;PNOC;NNAT;HNRNPD;FXYD6;RPS21
intermediate stratum of THyB-I	16/301	0.0107786	0.223065	0	0	1.98428	8.98919	CD63;DLX1;FCER1G;SDC2;RPL12;CRABP1;SOX11;PCSK1N;RPS19;TRIM28;RPL37A;S100A6;GNAS;VIM;RPS12;RPL19
parastrial preoptic nucleus	16/301	0.0107786	0.223065	0	0	1.98428	8.98919	SYT4;GPX1;RPL10;GNAI2;RPS15;FADS2;GAP43;PEG10;IL1B;PNOC;PEA15;NNAT;RPL13;TAGLN2;RPS21;RPS12
periventricular stratum of PcPV	16/301	0.0107786	0.223065	0	0	1.98428	8.98919	IFITM3;MARCKSL1;TNC;SOX11;NMNAT2;INHBA;ATP5G3;SEPT3;EEF1G;SQLE;YWHAQ;DPYSL5;DPYSL2;RPL27A;PNOC;RPL13
periventricular stratum of RtC	16/301	0.0107786	0.223065	0	0	1.98428	8.98919	RAB3C;RPL10;HSPA5;USP22;L1CAM;GNAI2;SOX2;FADS2;MORF4L1;GAP43;CDH2;DPYSL5;FXYD6;TIMP1;TKT;AGRN
periventricular stratum of isLim	16/301	0.0107786	0.223065	0	0	1.98428	8.98919	VAT1;RPS8;RPL12;EBF3;GNAI2;ACLY;RPS28;RGS2;PEG10;PKIA;RPL37A;SNCG;FXYD6;NCAM1;RPS11;S100A10
retrohypothalamic nucleus	16/301	0.0107786	0.223065	0	0	1.98428	8.98919	RAB3C;RPL10;HSPA5;USP22;L1CAM;GNAI2;SOX2;FADS2;MORF4L1;GAP43;CDH2;DPYSL5;FXYD6;TIMP1;TKT;AGRN
shell of P-DMH	16/301	0.0107786	0.223065	0	0	1.98428	8.98919	RPS8;SDC2;USP22;SOX11;GNAI2;PCSK1N;RPS19;CDH2;PEG10;RPL37A;NNAT;FXYD6;TIMP1;RPS27A;PFDN5;RPS12
Bed nucleus of the anterior commissure	21/450	0.0155552	0.318881	0	0	1.73316	7.21577	SYT4;MARCKSL1;GPX1;RTN1;SERPINE2;CADM1;RGS16;USP11;SDC3;EBF3;L1CAM;GNAI2;SOX2;PEG10;PNOC;PEA15;NNAT;CTNNB1;TAGLN2;VAMP2;XPR1
Dorsal motor nucleus of the vagus nerve	15/301	0.0224051	0.416122	0	0	1.85025	7.02811	APC2;GPX1;RPL12;MSN;YWHAZ;ACLY;LGALS1;DPYSL3;PPT1;TAGLN2;PLIN2;A2M;S100A10;FDFT1;PRPH
Lingula (I)	15/301	0.0224051	0.416122	0	0	1.85025	7.02811	CD63;CD82;RPLP0;IGFBP2;ITGB2;DBI;TREM2;AMPD3;FADS2;TTR;TXNIP;FLNA;A2M;CTSD;WLS
Medial septal nucleus	15/301	0.0224051	0.416122	0	0	1.85025	7.02811	SYT4;PTPRS;CADM1;USP11;NSG1;GNAI2;ACLY;ALCAM;PEG10;PNOC;DNER;ZIC1;MAPT;AP2M1;XPR1
Periventricular hypothalamic nucleus, posterior part	15/301	0.0224051	0.416122	0	0	1.85025	7.02811	CD63;DLX1;FCER1G;SDC2;RPL12;CRABP1;MSN;SOX11;PCSK1N;TRIM28;S100A6;GNAS;VIM;RPS12;RPL19
Ventromedial hypothalamic nucleus, central part	15/301	0.0224051	0.416122	0	0	1.85025	7.02811	RPL5;DLX1;FCER1G;SDC2;CRABP1;STMN3;RPL35A;SOX11;GNAI2;EEF1A1;PCSK1N;TRIM28;CDH2;PEG10;RPS12
diagonal part of septum	15/301	0.0224051	0.416122	0	0	1.85025	7.02811	VAT1;SYT4;CADM1;USP11;GNAI2;ACLY;ALCAM;PEG10;DNER;ZIC1;TXNIP;FXYD6;EVL;MAPT;AP2M1
intermediate stratum of PPaA	15/301	0.0224051	0.416122	0	0	1.85025	7.02811	VAT1;SYT4;GPX1;CD81;USP11;RPL11;GNAI2;RPS15;EEF1G;PEG10;PNOC;NNAT;FXYD6;TMBIM6;RPS21
isthmic liminal part of the periaqueductal gray	15/301	0.0224051	0.416122	0	0	1.85025	7.02811	VAT1;RPS8;RPL12;EBF3;GNAI2;RPS28;RGS2;PEG10;PKIA;PNOC;RPL37A;SNCG;FXYD6;RPS11;S100A10
lateral septal nucleus, intermedio-ventral part	15/301	0.0224051	0.416122	0	0	1.85025	7.02811	DDX17;SYT4;CADM1;USP11;GNAI2;SOX2;ALCAM;PEG10;PNOC;ZIC1;COL6A1;DCX;FXYD6;NCAM1;RPS21
mantle zone of DgSe	15/301	0.0224051	0.416122	0	0	1.85025	7.02811	VAT1;SYT4;CADM1;USP11;GNAI2;ACLY;ALCAM;PEG10;PNOC;DNER;ZIC1;FXYD6;EVL;MAPT;AP2M1
medial amygdala, anterodorsal part	15/301	0.0224051	0.416122	0	0	1.85025	7.02811	RPL21;NR2F1;CXCL13;PRDX6;SOX2;ALCAM;RPS19;CDH2;CHL1;PNOC;DNER;RPL14;TRIB2;AP2M1;XPR1
Anterior hypothalamic nucleus, central part	14/301	0.0438028	0.647507	0	0	1.71763	5.37284	DLX1;GPX1;CADM1;MAGED1;USP11;GRIK3;GNAI2;PCSK1N;PEG10;PNOC;CANX;NNAT;FXYD6;RPS21
Central amygdalar nucleus	14/301	0.0438028	0.647507	0	0	1.71763	5.37284	RPL21;USP22;NR2F1;NSG1;GNAI2;RGS2;TTR;RPS19;CHL1;PNOC;COL6A1;XPR1;WLS;PRPH
Dorsomedial nucleus of the hypothalamus, ventral part	14/301	0.0438028	0.647507	0	0	1.71763	5.37284	CD63;DLX1;FCER1G;RPL21;SDC2;CRABP1;SOX11;PCSK1N;CDH2;PEG10;RPL37A;RPS2;RPS27A;RPS12
Hypothalamus	14/301	0.0438028	0.647507	0	0	1.71763	5.37284	VAT1;DLX1;SDC2;USP11;CRABP1;CXCL13;GNAI2;PCSK1N;PEG10;NNAT;FXYD6;TMBIM6;RPS21;RPS12
JcPL part of the periaqueductal gray	14/301	0.0438028	0.647507	0	0	1.71763	5.37284	IFITM3;CD63;SYT4;DBI;PRDX6;GNAI2;FADS2;TUBA1A;YWHAQ;TXNIP;RPL27;FXYD6;RPL26;YWHAG
Medial preoptic nucleus, lateral part	14/301	0.0438028	0.647507	0	0	1.71763	5.37284	DLX1;MARCKSL1;FCER1G;CADM1;MAGED1;SDC2;RGS16;USP11;EEF1A1;PCSK1N;VGF;PEG10;CANX;NNAT
Median preoptic nucleus	14/301	0.0438028	0.647507	0	0	1.71763	5.37284	VAT1;MAGED1;SDC2;USP11;PRDX6;GNAI2;PEG10;PNOC;PEA15;NNAT;TXNIP;TIMP1;TKT;RPS12
Retrosplenial area, lateral agranular part, layer 6a	14/301	0.0438028	0.647507	0	0	1.71763	5.37284	NTRK2;CDKN1A;RBFOX2;PTPRS;MYO5A;HMGCR;YWHAZ;DUSP6;GLTSCR2;NGRN;TNRC18;S100A4;RPS27A;RAB6B
central part of MPO	14/301	0.0438028	0.647507	0	0	1.71763	5.37284	DLX1;FCER1G;SDC2;RGS16;CIRBP;PCSK1N;RPS19;NRG4;PEG10;PNOC;CANX;NNAT;UBA1;RPS12
dorsal peduncular cortex, periventricular part	14/301	0.0438028	0.647507	0	0	1.71763	5.37284	TOP2A;SERPINE2;GRIK3;SOX11;DBI;HN1;RGS2;CDH2;COL6A1;DCX;FLNA;CDH13;RPS2;SOX4
dorsomedial nucleus, terminal part	14/301	0.0438028	0.647507	0	0	1.71763	5.37284	CD63;DLX1;FCER1G;SDC2;RPL12;SOX11;PCSK1N;RPS19;TRIM28;PEG10;RPL37A;GNAS;TAGLN2;VIM
intermediate stratum of PO1	14/301	0.0438028	0.647507	0	0	1.71763	5.37284	VAT1;CADM1;RPS7;USP11;SMARCA4;GNAI2;RPS15;NRG4;PEG10;PNOC;NNAT;FXYD6;RPS21;RPS12
intermediate stratum of ZIC	14/301	0.0438028	0.647507	0	0	1.71763	5.37284	H2AFY;CD81;RPS8;SDC2;RPL11;EBF3;EEF1G;RPS25;PEG10;PKIA;PNOC;RPL24;TMBIM6;RPS21
layer 5 of OCx	14/301	0.0438028	0.647507	0	0	1.71763	5.37284	NTRK2;CDKN1A;YWHAB;MYO5A;PTN;HMGCR;SYT13;NR3C1;DUSP6;GLTSCR2;LASP1;TNRC18;RAB6B;TPT1
locus coeruleus	14/301	0.0438028	0.647507	0	0	1.71763	5.37284	VAT1;APC2;SEPT2;TMEFF1;ACLY;RPS18;PEG10;PRDX1;RPL37A;SNCG;PLIN2;NCAM1;S100A10;FDFT1
mantle zone of PalSe	14/301	0.0438028	0.647507	0	0	1.71763	5.37284	SYT4;SERPINE2;GNAI2;SOX2;RGS2;ALCAM;TTR;PEG10;PNOC;ZIC1;COL6A1;SOX4;XPR1;ITM2C
mantle zone of ZIC	14/301	0.0438028	0.647507	0	0	1.71763	5.37284	H2AFY;CD81;RPS8;SDC2;RPL11;EBF3;EEF1G;RPS25;PEG10;PKIA;PNOC;RPL24;TMBIM6;RPS21
mantle zone of isBL	14/301	0.0438028	0.647507	0	0	1.71763	5.37284	VAT1;CSTB;RPL12;RPS6;EBF3;ACLY;RGS2;RPS18;PEG10;PNOC;SNCG;RPS20;NCAM1;S100A10
periventricular stratum of ITTh	14/301	0.0438028	0.647507	0	0	1.71763	5.37284	IFITM3;RAB3C;SDC2;RGS16;TNC;NMNAT2;L1CAM;NR3C1;MORF4L1;RIMS3;SCRN1;DPYSL5;CTNNB1;AGRN
periventricular stratum of JcPL	14/301	0.0438028	0.647507	0	0	1.71763	5.37284	IFITM3;CD63;SYT4;DBI;PRDX6;GNAI2;FADS2;TUBA1A;YWHAQ;TXNIP;RPL27;FXYD6;RPL26;YWHAG
periventricular stratum of TTe	14/301	0.0438028	0.647507	0	0	1.71763	5.37284	TOP2A;SERPINE2;GRIK3;SOX11;DBI;HN1;RGS2;CDH2;COL6A1;DCX;FLNA;CDH13;RPS2;SOX4
periventricular stratum of r1BL	14/301	0.0438028	0.647507	0	0	1.71763	5.37284	VAT1;APC2;SEPT2;TMEFF1;ACLY;RPS18;PEG10;PRDX1;RPL37A;SNCG;PLIN2;NCAM1;S100A10;FDFT1
posteromedial visual area, layer 6a	14/301	0.0438028	0.647507	0	0	1.71763	5.37284	SPAG9;NTRK2;CDKN1A;TRIO;CNBP;SYP;PTN;HMGCR;DUSP6;GLTSCR2;TUBA1B;ZMIZ1;MAPT;RAB6B
r10 part of nucleus gracilis	14/301	0.0438028	0.647507	0	0	1.71763	5.37284	APC2;GPX1;IGFBP3;MSN;LSS;YWHAZ;DPYSL3;PPT1;S100A6;TAGLN2;PLIN2;A2M;FDFT1;PRPH
rostral interstitial nucleus	14/301	0.0438028	0.647507	0	0	1.71763	5.37284	GPM6A;RPL21;RPS8;SDC2;EBF3;HSPG2;LSS;EEF1G;YWHAQ;SCRN1;DPYSL5;IDS;NCAM1;PFDN5
rostral zona incerta	14/301	0.0438028	0.647507	0	0	1.71763	5.37284	H2AFY;CD81;RPS8;SDC2;RPL11;EBF3;EEF1G;RPS25;PEG10;PKIA;PNOC;RPL24;TMBIM6;RPS21
septohypothalamic nucleus	14/301	0.0438028	0.647507	0	0	1.71763	5.37284	SYT4;GPX1;SDC3;RPSA;L1CAM;GNAI2;SOX2;ALCAM;PEG10;PEA15;ZIC1;NNAT;FXYD6;DBN1
shell of T-DMH	14/301	0.0438028	0.647507	0	0	1.71763	5.37284	CD63;DLX1;FCER1G;SDC2;RPL12;SOX11;PCSK1N;RPS19;TRIM28;PEG10;RPL37A;GNAS;TAGLN2;VIM
tegmental field of p3 (Forel's field)	14/301	0.0438028	0.647507	0	0	1.71763	5.37284	SERPINE2;RPS8;SDC2;EBF3;YWHAQ;DNER;RPL37A;SNCG;TMBIM6;NCAM1;RPL26;TKT;RPS24;VAMP2
zona incerta complex	14/301	0.0438028	0.647507	0	0	1.71763	5.37284	H2AFY;CD81;RPS8;SDC2;RPL11;EBF3;EEF1G;RPS25;PEG10;PKIA;PNOC;RPL24;TMBIM6;RPS21
Central amygdalar nucleus, capsular part	18/433	0.0612745	0.899659	0	0	1.52827	4.26754	RPL21;NR2F1;TNC;GNAI2;ACTG1;RGS2;GAP43;TTR;RPS19;CHL1;PEG10;IL1B;PNOC;COL6A1;AP2M1;XPR1;WLS;PRPH
Trochlear nucleus	17/405	0.0629287	0.917745	0	0	1.54314	4.26795	VAT1;RPL10;MSN;AMPD3;YWHAZ;ACLY;RPS28;RGS2;TUBA1A;LGALS1;TUBB3;PNOC;RPL37A;NCAM1;S100A10;FDFT1;RPS12
Central amygdalar nucleus, medial part	13/301	0.0803614	0.986584	0	0	1.5864	3.99968	RPL21;YWHAB;USP22;CRABP1;NSG1;GNAI2;RGS2;RPS19;CHL1;PNOC;COL6A1;XPR1;PRPH
Dorsal nucleus raphe	13/301	0.0803614	0.986584	0	0	1.5864	3.99968	VAT1;AMPD3;L1CAM;ACLY;RPS28;RGS2;PNOC;RPL37A;SNCG;NCAM1;TKT;S100A10;FDFT1
Dorsal peduncular area, layer 6a	13/301	0.0803614	0.986584	0	0	1.5864	3.99968	TOP2A;GRN;RPLP0;GRIK3;SOX11;CDH2;PPP2R1A;COL6A1;S100A6;DCX;FLNA;CDH13;SOX4
Medial amygdalar nucleus, anterodorsal part	13/301	0.0803614	0.986584	0	0	1.5864	3.99968	MARCKSL1;RPL21;NR2F1;CXCL13;PRDX6;SOX2;ALCAM;RPS19;CDH2;DNER;GNAS;TRIB2;AP2M1
Periventricular zone	13/301	0.0803614	0.986584	0	0	1.5864	3.99968	VAT1;CD63;DLX1;RPS7;SDC2;CRABP1;GNAI2;PCSK1N;RPL18A;PEG10;TXNIP;RPS12;RPL19
Primary visual area, layer 6b	13/301	0.0803614	0.986584	0	0	1.5864	3.99968	CAP1;CDKN1A;YWHAB;HMGCR;NR3C1;GLTSCR2;MYL6;FASN;COL6A1;PPT1;CTNNB1;HDGF;PAFAH1B1
Sublaterodorsal nucleus	13/301	0.0803614	0.986584	0	0	1.5864	3.99968	VAT1;APC2;TNC;SEPT2;TMEFF1;ACLY;PEG10;FASN;SNCG;PLIN2;FAU;S100A10;FDFT1
Ventromedial hypothalamic nucleus, dorsomedial part	13/301	0.0803614	0.986584	0	0	1.5864	3.99968	RPL5;DLX1;RPL10;SDC2;CRABP1;RPL35A;SOX11;GNAI2;PCSK1N;CDH2;PEG10;VIM;RPS12
anterior paraventricular nucleus of thalamus	13/301	0.0803614	0.986584	0	0	1.5864	3.99968	CD63;RAB3C;SDC2;RGS16;ITGB2;L1CAM;SOX2;RIMS3;DPYSL5;FASN;ZIC1;CTNNB1;MAPT
intermediate periretromammillary nucleus	13/301	0.0803614	0.986584	0	0	1.5864	3.99968	FCER1G;CD81;SDC2;EBF3;SOX11;PCSK1N;DPYSL5;DNER;RPL37A;NCAM1;RPL37;PFDN5;AP2M1
intermediate stratum of PHyB-P	13/301	0.0803614	0.986584	0	0	1.5864	3.99968	FCER1G;CD81;SDC2;EBF3;SOX11;PCSK1N;DPYSL5;DNER;RPL37A;NCAM1;RPL37;PFDN5;AP2M1
intermediate stratum of PalSe	13/301	0.0803614	0.986584	0	0	1.5864	3.99968	SYT4;SERPINE2;GNAI2;SOX2;RGS2;ALCAM;PEG10;PNOC;ZIC1;COL6A1;NNAT;XPR1;ITM2C
intermediate stratum of THyB-V	13/301	0.0803614	0.986584	0	0	1.5864	3.99968	CD63;DLX1;GRN;RPL12;MSN;SOX11;PCSK1N;TRIM28;S100A6;GNAS;RPL37;TIMP1;VIM
intermediate stratum of TPaA	13/301	0.0803614	0.986584	0	0	1.5864	3.99968	GPX1;CADM1;USP11;CIRBP;RPS15;PCSK1N;PEG10;PNOC;CANX;NNAT;HNRNPD;FXYD6;RPS21
lateral septal nucleus, intermedio-intermediate part	13/301	0.0803614	0.986584	0	0	1.5864	3.99968	SYT4;SERPINE2;GNAI2;SOX2;RGS2;ALCAM;PEG10;PNOC;ZIC1;COL6A1;NNAT;XPR1;ITM2C
layer 6 of OCx	13/301	0.0803614	0.986584	0	0	1.5864	3.99968	CAP1;CDKN1A;PTPRS;YWHAB;MYO5A;HMGCR;SYT13;NR3C1;KLC1;DUSP6;GLTSCR2;MYL6;COL6A1
mantle zone of PHyB-P	13/301	0.0803614	0.986584	0	0	1.5864	3.99968	CD81;SDC2;RPL12;EBF3;SOX11;PCSK1N;DPYSL5;DNER;RPL37A;NCAM1;TKT;PFDN5;AP2M1
mantle zone of POH	13/301	0.0803614	0.986584	0	0	1.5864	3.99968	VAT1;DLX1;MARCKSL1;CADM1;RGS16;USP11;CXCL13;PCSK1N;PEG10;PNOC;NNAT;FXYD6;RPS21
pallidal septum	13/301	0.0803614	0.986584	0	0	1.5864	3.99968	SYT4;SERPINE2;GNAI2;SOX2;RGS2;ALCAM;TTR;PEG10;ZIC1;COL6A1;SOX4;XPR1;ITM2C
perimammillary part of PHyB	13/301	0.0803614	0.986584	0	0	1.5864	3.99968	CD81;SDC2;RPL12;EBF3;SOX11;PCSK1N;DPYSL5;DNER;RPL37A;NCAM1;TKT;PFDN5;AP2M1
periventricular stratum of r9Lim	13/301	0.0803614	0.986584	0	0	1.5864	3.99968	APC2;GPX1;IGFBP3;MSN;AMPD3;PRDX6;YWHAZ;ACLY;LGALS1;FASN;TAGLN2;PLIN2;S100A10
posterior paraventricular nucleus	13/301	0.0803614	0.986584	0	0	1.5864	3.99968	IFITM3;CD63;RPL10;SDC2;RGS16;TNC;L1CAM;MORF4L1;SCRN1;DPYSL5;FASN;CTNNB1;MAPT
r9 portion of vagal motor nucleus (postmigratory)	13/301	0.0803614	0.986584	0	0	1.5864	3.99968	APC2;GPX1;IGFBP3;MSN;AMPD3;PRDX6;YWHAZ;ACLY;LGALS1;FASN;TAGLN2;PLIN2;S100A10
subethmoid nucleus	13/301	0.0803614	0.986584	0	0	1.5864	3.99968	RGS16;TNC;INHBA;L1CAM;NR3C1;LSS;RIMS3;YWHAQ;CTNNB1;S100A4;AGRN;IER3;YWHAH
substantia innominata/basal nucleus	13/301	0.0803614	0.986584	0	0	1.5864	3.99968	VAT1;SERPINE2;RPL10;CRABP1;RPS15;SOX2;EEF1G;RPS19;PEG10;DNER;TTC3;VAMP2;AP2M1
superficial part of arcuate nucleus	13/301	0.0803614	0.986584	0	0	1.5864	3.99968	CD63;DLX1;FCER1G;SDC2;RPL12;SOX11;GNAO1;PCSK1N;CANX;RPL37A;S100A6;GNAS;RPL37
superficial stratum of DgSe	13/301	0.0803614	0.986584	0	0	1.5864	3.99968	VAT1;SYT4;USP11;GNAI2;ACLY;ALCAM;PEG10;PNOC;DNER;ZIC1;MAPT;TKT;AP2M1
ventral tuberomammillary nucleus, intermediate part (histaminergic)	13/301	0.0803614	0.986584	0	0	1.5864	3.99968	CD63;DLX1;GRN;RPL12;MSN;SOX11;PCSK1N;TRIM28;S100A6;GNAS;RPL37;TIMP1;VIM
Septofimbrial nucleus	17/431	0.0972054	0.999962	0	0	1.44426	3.36646	DLX1;CD63;BTG1;IGFBP2;ITGB2;TREM2;EBF3;PTN;SOX2;FADS2;RGS2;TTR;ZIC1;TXNIP;VIM;DBN1;XPR1
Anterior olfactory nucleus, posteroventral part	12/301	0.138052	0.999962	0	0	1.45656	2.88417	TMEFF1;ACTR2;DNER;COL6A1;PLAUR;PTN;INHBA;YBX1;SOX4;VAMP2;AP2M1;RTN4
Anteroventral nucleus of thalamus	12/301	0.138052	0.999962	0	0	1.45656	2.88417	CD63;MMP14;GPX1;TTR;CD82;IGFBP2;ITGB2;DBI;VIM;HSPG2;LSS;CNN3
Barrington's nucleus	12/301	0.138052	0.999962	0	0	1.45656	2.88417	VAT1;APC2;FADS2;ACLY;RPS16;GPX1;PEG10;RPL35;SNCG;RPL35A;PLIN2;NSG1
Bed nuclei of the stria terminalis, anterior division, fusiform nucleus	12/301	0.138052	0.999962	0	0	1.45656	2.88417	RPS15;VAT1;RGS2;SERPINE2;CADM1;RGS1;PEG10;USP11;CRABP1;NNAT;NCAM1;GNAI2
Bed nuclei of the stria terminalis, anterior division, rhomboid nucleus	12/301	0.138052	0.999962	0	0	1.45656	2.88417	SOX2;RGS2;SERPINE2;CADM1;MAGED1;PEG10;CRABP1;PNOC;COL6A1;NNAT;RPS2;GNAI2
Interanteromedial nucleus of the thalamus	12/301	0.138052	0.999962	0	0	1.45656	2.88417	SOX2;RAB3C;RIMS3;DPYSL5;RGS16;ZIC1;LAPTM5;CTNNB1;EVL;L1CAM;AP2M1;CLASP2
Lateral septal nucleus, rostral (rostroventral) part	12/301	0.138052	0.999962	0	0	1.45656	2.88417	SOX2;SYT4;RGS2;ALCAM;SERPINE2;PEG10;PNOC;ZIC1;COL6A1;SOX4;XPR1;ITM2C
Lingula (I), granular layer	12/301	0.138052	0.999962	0	0	1.45656	2.88417	CD63;FADS2;CD82;RPLP0;IGFBP2;ITGB2;TREM2;AMPD3;VIM;A2M;CTSD;WLS
Locus ceruleus	12/301	0.138052	0.999962	0	0	1.45656	2.88417	VAT1;APC2;ACLY;GPX1;PEG10;PRDX1;SNCG;PLIN2;TKT;SEPT2;S100A10;FDFT1
Midbrain trigeminal nucleus	12/301	0.138052	0.999962	0	0	1.45656	2.88417	APC2;ACLY;RPS18;PEG10;PRDX1;RPL37A;PLXNA1;SNCG;RPS20;SEPT2;S100A10;GNAI2
Midline group of the dorsal thalamus	12/301	0.138052	0.999962	0	0	1.45656	2.88417	SOX2;RAB3C;RIMS3;CDH2;DPYSL5;SDC2;FASN;RGS16;ZIC1;LAPTM5;CTNNB1;L1CAM
Parabrachial nucleus, medial division	12/301	0.138052	0.999962	0	0	1.45656	2.88417	ACLY;RPS18;PEG10;PRDX1;PLXNA1;MSN;SNCG;RPS20;NCAM1;SEPT2;S100A10;GNAI2
Parabrachial nucleus, medial division, medial medial part	12/301	0.138052	0.999962	0	0	1.45656	2.88417	ACLY;RPS18;PEG10;PRDX1;PLXNA1;MSN;SNCG;RPS20;NCAM1;SEPT2;S100A10;GNAI2
Retrosplenial area, lateral agranular part, layer 6b	12/301	0.138052	0.999962	0	0	1.45656	2.88417	CAP1;NGRN;CDKN1A;PTPRS;ZMIZ1;YWHAB;COL6A1;MYO5A;S100A4;HMGCR;KLC1;GLTSCR2
Triangular nucleus of septum	12/301	0.138052	0.999962	0	0	1.45656	2.88417	SOX2;FADS2;BTG1;TTR;CD82;ITGB2;ZIC1;TXNIP;EBF3;TREM2;VIM;XPR1
anteroventral periventricular preoptic nucleus	12/301	0.138052	0.999962	0	0	1.45656	2.88417	VAT1;DLX1;ILF3;FCER1G;RPS7;PEG10;RGS16;USP11;RPL35;TXNIP;PRDX6;RPS12
basal part of terminal hypothalamus	12/301	0.138052	0.999962	0	0	1.45656	2.88417	CD63;DLX1;PCSK1N;FCER1G;TRIM28;PEG10;SDC2;RPL12;CRABP1;S100A6;SOX11;CXCL13
intermediate part of PHyB	12/301	0.138052	0.999962	0	0	1.45656	2.88417	VAT1;GRN;PCSK1N;MARCKSL1;CD81;PEG10;SDC2;SOX11;FXYD6;TMBIM6;TIMP1;GNAI2
intermediate part of the arcuate nucleus	12/301	0.138052	0.999962	0	0	1.45656	2.88417	CD63;DLX1;PCSK1N;FCER1G;TRIM28;SDC2;CRABP1;RPL37A;S100A6;SOX11;RPS12;RPL19
intermediate stratum of SeDg	12/301	0.138052	0.999962	0	0	1.45656	2.88417	RPS15;VAT1;RGS2;CADM1;PEG10;USP11;CRABP1;COL6A1;NNAT;NCAM1;RPS21;GNAI2
isthmic basal plate	12/301	0.138052	0.999962	0	0	1.45656	2.88417	VAT1;ACLY;RGS2;PEG10;SDC2;RPL12;PNOC;SNCG;EBF3;NCAM1;S100A10;FDFT1
lambdoid septal zone	12/301	0.138052	0.999962	0	0	1.45656	2.88417	SYT4;ALCAM;SERPINE2;PEG10;USP11;PNOC;DNER;ZIC1;COL6A1;DCX;AP2M1;XPR1
lateral septal nucleus, dorsal part	12/301	0.138052	0.999962	0	0	1.45656	2.88417	SOX2;RGS2;ALCAM;PNOC;ENC1;ZIC1;EBF3;DBI;TREM2;PTN;B2M;XPR1
lateral septal nucleus, intermediate part, periventricular	12/301	0.138052	0.999962	0	0	1.45656	2.88417	CD63;MMP14;RGS2;TTR;ZIC1;COL6A1;DBI;PTN;VIM;B2M;SOX4;CNN3
liminal nucleus	12/301	0.138052	0.999962	0	0	1.45656	2.88417	RIMS3;YWHAQ;DPYSL5;RGS16;FSCN1;CDH13;EBF3;EVL;L1CAM;TKT;AGRN;LSS
lower dorsal perifornical nucleus	12/301	0.138052	0.999962	0	0	1.45656	2.88417	RPS15;VAT1;PCSK1N;RPS7;PEG10;USP11;NNAT;HNRNPD;FXYD6;TMBIM6;RPS21;GNAI2
m1AD (DM) part of periaqueductal gray	12/301	0.138052	0.999962	0	0	1.45656	2.88417	RPL4;FADS2;GAP43;TUBA1A;RPL27A;PKIA;RPS6;RPL37A;CDH13;FXYD6;PRDX6;LSS
mantle zone of PHyB-I	12/301	0.138052	0.999962	0	0	1.45656	2.88417	VAT1;GRN;PCSK1N;MARCKSL1;CD81;PEG10;SDC2;SOX11;FXYD6;TMBIM6;TIMP1;GNAI2
mantle zone of THyB-V	12/301	0.138052	0.999962	0	0	1.45656	2.88417	IFITM3;DLX1;GRN;FCER1G;TRIM28;RPL12;S100A6;GNAS;SOX11;RPL37;TIMP1;VIM
mantle zone of the PBC	12/301	0.138052	0.999962	0	0	1.45656	2.88417	SQLE;SERPINE2;RPS18;RPS8;PEG10;NNAT;MSN;SNCG;EBF3;RPS20;NCAM1;GNAI2
nucleus of the stria terminalis, medial division, ventral part	12/301	0.138052	0.999962	0	0	1.45656	2.88417	SYT4;GPX1;NRG4;PEG10;USP11;PNOC;RPL11;NNAT;EBF3;RPS21;XPR1;GNAI2
parabrachial complex	12/301	0.138052	0.999962	0	0	1.45656	2.88417	SQLE;SERPINE2;RPS18;RPS8;PEG10;NNAT;MSN;SNCG;EBF3;RPS20;NCAM1;GNAI2
peduncular (caudal) hypothalamus	12/301	0.138052	0.999962	0	0	1.45656	2.88417	RPS15;VAT1;CD81;PEG10;SDC2;NNAT;FXYD6;TMBIM6;NCAM1;CXCL13;RPS21;GNAI2
peduncular nucleus of the stria medullaris	12/301	0.138052	0.999962	0	0	1.45656	2.88417	GAP43;GPX1;CADM1;HNRNPH1;PNOC;TAGLN2;FXYD6;RPS2;RPS21;PHLDA1;XPR1;GNAI2
periventricular part of StrSe	12/301	0.138052	0.999962	0	0	1.45656	2.88417	SOX2;RGS2;PNOC;ENC1;ZIC1;EBF3;DBI;TREM2;PTN;VIM;B2M;XPR1
periventricular stratum of PalSe	12/301	0.138052	0.999962	0	0	1.45656	2.88417	CD63;MMP14;RGS2;TTR;ZIC1;COL6A1;DBI;PTN;VIM;B2M;SOX4;CNN3
periventricular stratum of m1AD	12/301	0.138052	0.999962	0	0	1.45656	2.88417	RPL4;FADS2;GAP43;TUBA1A;RPL27A;PKIA;RPS6;RPL37A;CDH13;FXYD6;PRDX6;LSS
periventricular stratum of p1B	12/301	0.138052	0.999962	0	0	1.45656	2.88417	VAT1;ACLY;TUBB3;PNOC;EBF3;TIMP1;FAU;TKT;AGRN;LSS;RPS24;VAMP2
periventricular stratum of p2Lim	12/301	0.138052	0.999962	0	0	1.45656	2.88417	RIMS3;YWHAQ;DPYSL5;RGS16;FSCN1;CDH13;EBF3;EVL;L1CAM;TKT;AGRN;LSS
preopto-hypothalamic area	12/301	0.138052	0.999962	0	0	1.45656	2.88417	DLX1;PCSK1N;MARCKSL1;CADM1;PEG10;RGS16;USP11;PNOC;NNAT;FXYD6;CXCL13;RPS21
preopto-hypothalamic band	12/301	0.138052	0.999962	0	0	1.45656	2.88417	VAT1;DLX1;PCSK1N;MARCKSL1;CADM1;PEG10;RGS16;USP11;NNAT;FXYD6;CXCL13;RPS21
r1 roof plate	12/301	0.138052	0.999962	0	0	1.45656	2.88417	CD63;TTR;CD82;IGFBP3;IGFBP2;ITGB2;FLNA;DBI;HSPG2;CTSD;TPT1;WLS
retroreuniens nucleus	12/301	0.138052	0.999962	0	0	1.45656	2.88417	IFITM3;SOX2;RAB3C;SERPINE2;YWHAQ;DPYSL5;SDC2;RGS16;PNOC;EBF3;L1CAM;AGRN
septopallidal core nucleus	12/301	0.138052	0.999962	0	0	1.45656	2.88417	TOP2A;RGS2;SFPQ;CADM1;TSC22D1;PEG10;FABP7;CRABP1;COL6A1;NNAT;DCX;ITM2C
sublayer 6b of OCx	12/301	0.138052	0.999962	0	0	1.45656	2.88417	CAP1;MYL6;CDKN1A;COL6A1;PPT1;MYO5A;HDGF;HMGCR;NR3C1;KLC1;DUSP6;GLTSCR2
substantia innominata/basal nucleus, transitional part	12/301	0.138052	0.999962	0	0	1.45656	2.88417	RPS15;VAT1;RGS2;CADM1;PEG10;USP11;CRABP1;COL6A1;NNAT;NCAM1;RPS21;GNAI2
triangular septal nucleus	12/301	0.138052	0.999962	0	0	1.45656	2.88417	SOX2;FADS2;BTG1;GPX1;TTR;IGFBP2;ITGB2;ZIC1;EBF3;TREM2;VIM;SMARCA4
ventral isthmic part of dorsal raphe nucleus	12/301	0.138052	0.999962	0	0	1.45656	2.88417	VAT1;ACLY;RGS2;TUBA1A;DPYSL5;ITGB2;RPL37A;NCAM1;AMPD3;L1CAM;S100A10;FDFT1
ventral part of THyB	12/301	0.138052	0.999962	0	0	1.45656	2.88417	IFITM3;DLX1;GRN;FCER1G;TRIM28;RPL12;S100A6;GNAS;SOX11;RPL37;TIMP1;VIM
Parafascicular nucleus	15/393	0.138103	0.999962	0	0	1.3932	2.7582	IFITM3;RAB3C;SERPINE2;RGS16;TNC;L1CAM;NR3C1;LSS;RIMS3;SCRN1;YWHAQ;CTNNB1;EVL;AGRN;IER3
lateral posterior nucleus	21/602	0.174305	0.999962	0	0	1.2695	2.21776	VAT1;SYT4;GPX1;PTPRS;CADM1;MAGED1;RGS16;USP11;TNC;GNAI2;RPS15;PCSK1N;PEG10;PNOC;NNAT;CANX;HNRNPD;FXYD6;TMBIM6;RPS27A;RPS21
Dorsal premammillary nucleus	17/482	0.192932	0.999962	0	0	1.28241	2.1101	FCER1G;TSC22D1;CD81;RPL12;SDC2;SOX11;EBF3;PCSK1N;TRIM28;DPYSL5;RPL37A;DNER;CANX;S100A6;GNAS;RPL37;PFDN5
Agranular insular area, dorsal part, layer 6a	11/301	0.221638	0.999962	0	0	1.32807	2.00102	GNAO1;ACTR2;TYROBP;GNG2;YWHAB;FASN;ISLR2;RPS20;SREBF2;XPR1;IER3
Agranular insular area, ventral part, layer 6a	11/301	0.221638	0.999962	0	0	1.32807	2.00102	GNAO1;SQLE;ACTR2;TYROBP;GNG2;ISLR2;CDH13;HMGCR;XPR1;IER3;PRPH
Anterior hypothalamic nucleus, anterior part	11/301	0.221638	0.999962	0	0	1.32807	2.00102	PCSK1N;PEG10;USP11;CRABP1;CANX;HNRNPD;GNAS;STMN3;RPS21;PRRC2B;GNAI2
Anterior hypothalamic nucleus, posterior part	11/301	0.221638	0.999962	0	0	1.32807	2.00102	PCSK1N;CADM1;RPL31;PEG10;USP11;PEA15;CANX;NNAT;GRIK3;FXYD6;GNAI2
Anterior olfactory nucleus, medial part	11/301	0.221638	0.999962	0	0	1.32807	2.00102	TOP2A;IL1RN;DCX;CRMP1;SOX11;PTN;INHBA;YBX1;TKT;SOX4;VAMP2
Arcuate hypothalamic nucleus	11/301	0.221638	0.999962	0	0	1.32807	2.00102	CD63;DLX1;RPL18A;TRIM28;RPS7;RGS1;SDC2;CRABP1;S100A6;VIM;RPS12
Bed nuclei of the stria terminalis, anterior division, oval nucleus	11/301	0.221638	0.999962	0	0	1.32807	2.00102	SOX2;RGS2;SERPINE2;TTYH1;PEG10;CRABP1;COL6A1;S100A6;SLC1A3;SOX4;GNAI2
Central medial nucleus of the thalamus	11/301	0.221638	0.999962	0	0	1.32807	2.00102	IFITM3;SOX2;RAB3C;RIMS3;DPYSL5;RGS16;ZIC1;CTNNB1;EVL;L1CAM;AGRN
CoPV part of the periaqueductal gray	11/301	0.221638	0.999962	0	0	1.32807	2.00102	SQLE;CSTB;FADS2;TUBA1A;SERPINE2;RPL27A;RPL13;FXYD6;AGRN;PRDX6;YWHAG
Copula pyramidis, molecular layer	11/301	0.221638	0.999962	0	0	1.32807	2.00102	CADM3;BTG1;ZMIZ1;UBN2;ITGB2;ZIC1;TNC;ATN1;VIM;A2M;ZFP36L1
Crus 2	11/301	0.221638	0.999962	0	0	1.32807	2.00102	CADM3;H1F0;BTG1;PTPRZ1;ZMIZ1;UBN2;ZIC1;STMN2;TNC;ATN1;ZFP36L1
Crus 2, granular layer	11/301	0.221638	0.999962	0	0	1.32807	2.00102	CADM3;H1F0;BTG1;PTPRZ1;ZMIZ1;UBN2;ZIC1;STMN2;TNC;ATN1;ZFP36L1
Endopiriform nucleus, dorsal part	11/301	0.221638	0.999962	0	0	1.32807	2.00102	GNAO1;ACTR2;TYROBP;GNG2;RPL21;FOXG1;COL6A1;ISLR2;HMGCR;SREBF2;VAMP2
Gustatory areas, layer 6a	11/301	0.221638	0.999962	0	0	1.32807	2.00102	GNAO1;TMEFF1;ACTR2;LASP1;TYROBP;GNG2;PPT1;PLAUR;ACTN4;IER3;PRPH
Lateral hypothalamic area	11/301	0.221638	0.999962	0	0	1.32807	2.00102	RPS15;VAT1;PCSK1N;PEG10;NNAT;FXYD6;TMBIM6;NCAM1;RPS21;AP2M1;GNAI2
Paramedian lobule	11/301	0.221638	0.999962	0	0	1.32807	2.00102	CADM3;BTG1;PTPRZ1;ZMIZ1;UBN2;ZIC1;TNC;ATN1;VIM;A2M;ZFP36L1
Paramedian lobule, molecular layer	11/301	0.221638	0.999962	0	0	1.32807	2.00102	CADM3;BTG1;PTPRZ1;ZMIZ1;UBN2;ZIC1;TNC;ATN1;VIM;A2M;ZFP36L1
PcPL part of the periaqueductal gray	11/301	0.221638	0.999962	0	0	1.32807	2.00102	IFITM3;SQLE;CD63;FADS2;YWHAQ;SDC2;TXNIP;FXYD6;PRDX6;YWHAG;GNAI2
Periaqueductal gray	11/301	0.221638	0.999962	0	0	1.32807	2.00102	SQLE;RPS8;PNOC;RPL37A;SNCG;EBF3;NCAM1;AGRN;LSS;PFDN5;RPS24
Prelimbic area, layer 6b	11/301	0.221638	0.999962	0	0	1.32807	2.00102	YWHAE;RPL5;FADS2;CD164;CDH2;PPP2R1A;COL6A1;GRIK3;CPE;SEPT2;SEPT3
Simple lobule	11/301	0.221638	0.999962	0	0	1.32807	2.00102	CADM3;BTG1;PTPRZ1;ZMIZ1;UBN2;ZIC1;TNC;ATN1;VIM;A2M;ZFP36L1
Simple lobule, granular layer	11/301	0.221638	0.999962	0	0	1.32807	2.00102	CADM3;BTG1;PTPRZ1;ZMIZ1;UBN2;ZIC1;TNC;ATN1;VIM;A2M;ZFP36L1
Taenia tecta, dorsal part, layer 4	11/301	0.221638	0.999962	0	0	1.32807	2.00102	TOP2A;GRN;CDH2;CHL1;GRIK3;DCX;FLNA;CDH13;SOX11;SOX4;VAMP2
Ventral premammillary nucleus	11/301	0.221638	0.999962	0	0	1.32807	2.00102	DLX1;PCSK1N;FCER1G;TRIM28;SDC2;RPL12;CANX;RPL37A;GNAS;SOX11;TAGLN2
accumbens nucleus, core domain	11/301	0.221638	0.999962	0	0	1.32807	2.00102	TOP2A;RGS2;ALCAM;SERPINE2;COL6A1;DCX;GPC2;SOX11;ATP2B1;PHLDA1;SOX4
bed nucleus of the stria terminalis, laterocentral division	11/301	0.221638	0.999962	0	0	1.32807	2.00102	SOX2;TOP2A;RGS2;GPX1;TTR;TTYH1;PEG10;CRABP1;COL6A1;S100A6;DCX
cerebellar white matter	11/301	0.221638	0.999962	0	0	1.32807	2.00102	CADM3;BTG1;PTPRZ1;ZMIZ1;UBN2;ZIC1;STMN2;TNC;ATN1;A2M;ZFP36L1
cortex of cerebellar hemisphere	11/301	0.221638	0.999962	0	0	1.32807	2.00102	CADM3;BTG1;PTPRZ1;ZMIZ1;UBN2;ZIC1;TNC;ATN1;VIM;A2M;ZFP36L1
dorsal part of THyB	11/301	0.221638	0.999962	0	0	1.32807	2.00102	VAT1;DLX1;PCSK1N;TRIM28;RPS7;PEG10;SDC2;CRABP1;CXCL13;RPS12;GNAI2
dorsal part of m2A	11/301	0.221638	0.999962	0	0	1.32807	2.00102	FADS2;TUBA1A;SERPINE2;RPL10;PKIA;NNAT;FXYD6;VIM;PRDX6;WLS;CNN3
dorsal preisthmic part of periaqueductal gray	11/301	0.221638	0.999962	0	0	1.32807	2.00102	FADS2;TUBA1A;SERPINE2;RPL10;PKIA;NNAT;FXYD6;VIM;PRDX6;WLS;CNN3
dorsolateral isthmic part of the dorsal raphe nucleus	11/301	0.221638	0.999962	0	0	1.32807	2.00102	VAT1;FADS2;ACLY;RGS2;DPYSL5;SDC2;RPS6;RPL37A;NCAM1;S100A10;FDFT1
ethmoid nucleus	11/301	0.221638	0.999962	0	0	1.32807	2.00102	RIMS3;YWHAQ;RGS16;TNC;S100A4;INHBA;L1CAM;NR3C1;LSS;IER3;YWHAH
interanterodorsal nucleus	11/301	0.221638	0.999962	0	0	1.32807	2.00102	RAB3C;RIMS3;GPX1;DPYSL5;SDC2;RGS16;ZIC1;CTNNB1;L1CAM;AP2M1;CLASP2
intermediate stratum of THyB-D	11/301	0.221638	0.999962	0	0	1.32807	2.00102	VAT1;DLX1;PCSK1N;FCER1G;TRIM28;RPS7;PEG10;SDC2;CRABP1;RPS12;GNAI2
internal granular layer of CbHCx	11/301	0.221638	0.999962	0	0	1.32807	2.00102	CADM3;BTG1;PTPRZ1;ZMIZ1;UBN2;ZIC1;TNC;ATN1;VIM;A2M;ZFP36L1
lateral part of the isB	11/301	0.221638	0.999962	0	0	1.32807	2.00102	VAT1;ACLY;RGS2;SDC2;RPL12;PNOC;SNCG;EBF3;NCAM1;S100A10;FDFT1
lateral spiriform nucleus	11/301	0.221638	0.999962	0	0	1.32807	2.00102	IFITM3;SQLE;FADS2;GAP43;YWHAQ;SDC2;FABP7;TNC;PRDX6;PFDN5;YWHAG
layer 3 of LOT	11/301	0.221638	0.999962	0	0	1.32807	2.00102	SOX2;ACAP3;MARCKSL1;RPL21;SCRN1;GNAS;STMN3;HDGF;CXCL13;MMP9;AP2M1
layer 4 of OCx	11/301	0.221638	0.999962	0	0	1.32807	2.00102	CDKN1A;LASP1;CCL20;TNRC18;MAPT;PTN;HMGCR;GAPDH;DUSP6;GLTSCR2;TPT1
liminal part of the r6 alar plate	11/301	0.221638	0.999962	0	0	1.32807	2.00102	ACLY;LGALS1;NRG4;RPL12;MSN;SNCG;SOX11;HLA-A;LSS;EIF4B;S100A10
liminal periaqueductal gray of m2	11/301	0.221638	0.999962	0	0	1.32807	2.00102	RPL30;PEG10;RPL12;PNOC;HMGA1;SNCG;EBF3;RPS11;AGRN;AP2M1;GNAI2
lower basal lateral hypothalamic area	11/301	0.221638	0.999962	0	0	1.32807	2.00102	VAT1;RPS28;MARCKSL1;TSC22D1;CD81;RPL35A;EBF3;TKT;CXCL13;PHLDA1;PFDN5
lower basal perifornical nucleus	11/301	0.221638	0.999962	0	0	1.32807	2.00102	VAT1;PCSK1N;TSC22D1;CD81;PEG10;DNER;RPL37A;SOX11;TKT;PFDN5;GNAI2
mantle zone of THyB-D	11/301	0.221638	0.999962	0	0	1.32807	2.00102	VAT1;DLX1;PCSK1N;TRIM28;RPS7;PEG10;SDC2;CRABP1;CXCL13;RPS12;GNAI2
mantle zone of isBM	11/301	0.221638	0.999962	0	0	1.32807	2.00102	VAT1;ACLY;RGS2;DPYSL5;SDC2;PNOC;RPL37A;NCAM1;AMPD3;S100A10;FDFT1
mantle zone of m2AD	11/301	0.221638	0.999962	0	0	1.32807	2.00102	FADS2;TUBA1A;SERPINE2;RPL10;PKIA;NNAT;FXYD6;VIM;PRDX6;WLS;CNN3
mantle zone of r6Lim	11/301	0.221638	0.999962	0	0	1.32807	2.00102	ACLY;LGALS1;NRG4;RPL12;MSN;SNCG;SOX11;HLA-A;LSS;EIF4B;S100A10
medial part of the isB	11/301	0.221638	0.999962	0	0	1.32807	2.00102	VAT1;ACLY;RGS2;DPYSL5;SDC2;PNOC;RPL37A;NCAM1;AMPD3;S100A10;FDFT1
p1B part of the periaqueductal gray	11/301	0.221638	0.999962	0	0	1.32807	2.00102	VAT1;ACLY;TUBB3;PNOC;EBF3;TIMP1;FAU;AGRN;LSS;RPS24;VAMP2
p3 portion of paranigral nucleus	11/301	0.221638	0.999962	0	0	1.32807	2.00102	IFITM3;IL1RN;SDC2;DNER;IGFBP2;S100A6;S100A4;TIMP1;VIM;A2M;TKT
periventricular mantle of isBM	11/301	0.221638	0.999962	0	0	1.32807	2.00102	VAT1;ACLY;RGS2;TUBA1A;ITGB2;RPL37A;NCAM1;AMPD3;L1CAM;S100A10;FDFT1
periventricular stratum of CbH	11/301	0.221638	0.999962	0	0	1.32807	2.00102	CADM3;BTG1;PTPRZ1;ZMIZ1;UBN2;ZIC1;STMN2;TNC;ATN1;A2M;ZFP36L1
periventricular stratum of CoPV	11/301	0.221638	0.999962	0	0	1.32807	2.00102	SQLE;CSTB;FADS2;TUBA1A;SERPINE2;RPL27A;RPL13;FXYD6;AGRN;PRDX6;YWHAG
periventricular stratum of Pal	11/301	0.221638	0.999962	0	0	1.32807	2.00102	SOX2;TOP2A;RGS2;GPX1;TTR;TTYH1;PEG10;CRABP1;COL6A1;S100A6;DCX
periventricular stratum of PcPL	11/301	0.221638	0.999962	0	0	1.32807	2.00102	IFITM3;SQLE;CD63;FADS2;YWHAQ;SDC2;TXNIP;FXYD6;PRDX6;YWHAG;GNAI2
periventricular stratum of SeStr	11/301	0.221638	0.999962	0	0	1.32807	2.00102	TOP2A;RGS2;ALCAM;SERPINE2;COL6A1;DCX;GPC2;SOX11;ATP2B1;PHLDA1;SOX4
periventricular stratum of m2AD	11/301	0.221638	0.999962	0	0	1.32807	2.00102	FADS2;TUBA1A;SERPINE2;RPL10;PKIA;NNAT;FXYD6;VIM;PRDX6;WLS;CNN3
periventricular stratum of m2Lim	11/301	0.221638	0.999962	0	0	1.32807	2.00102	RPL30;PEG10;RPL12;PNOC;HMGA1;SNCG;EBF3;RPS11;AGRN;AP2M1;GNAI2
periventricular stratum of r10Tr	11/301	0.221638	0.999962	0	0	1.32807	2.00102	APC2;ACLY;LGALS1;PPT1;MSN;TAGLN2;PLIN2;A2M;PRDX6;YWHAZ;S100A10
periventricular stratum of r1Lim	11/301	0.221638	0.999962	0	0	1.32807	2.00102	SQLE;ACLY;GPX1;RPS18;RPL37A;SNCG;RPS20;PLIN2;NCAM1;SAT1;S100A10
periventricular stratum of r9Tr	11/301	0.221638	0.999962	0	0	1.32807	2.00102	VAT1;APC2;ACLY;LGALS1;IGFBP3;TAGLN2;PLIN2;A2M;PRDX6;YWHAZ;S100A10
posteromedial visual area, layer 4	11/301	0.221638	0.999962	0	0	1.32807	2.00102	IFITM3;NGRN;CDKN1A;WDR82;TNRC18;PTN;HMGCR;YWHAZ;DCLK1;DUSP6;GLTSCR2
r10 part of solitary complex	11/301	0.221638	0.999962	0	0	1.32807	2.00102	APC2;ACLY;LGALS1;PPT1;MSN;TAGLN2;PLIN2;A2M;PRDX6;YWHAZ;S100A10
r9 (gustatory) part of solitary complex	11/301	0.221638	0.999962	0	0	1.32807	2.00102	VAT1;APC2;ACLY;LGALS1;IGFBP3;TAGLN2;PLIN2;A2M;PRDX6;YWHAZ;S100A10
roof plate of p2 (epithalamic roofplate)	11/301	0.221638	0.999962	0	0	1.32807	2.00102	IFITM3;CD63;FADS2;IL1RN;MMP14;IL1B;IGFBP3;ITGB2;TXNIP;DBI;VIM
sublayer 6a of OCx	11/301	0.221638	0.999962	0	0	1.32807	2.00102	CAP1;NTRK2;CDKN1A;PTPRS;MYO5A;TNRC18;HMGCR;NR3C1;KLC1;DUSP6;GLTSCR2
superficial stratum of cerebellar hemisphere	11/301	0.221638	0.999962	0	0	1.32807	2.00102	CADM3;BTG1;PTPRZ1;ZMIZ1;UBN2;ZIC1;TNC;ATN1;VIM;A2M;ZFP36L1
Ventromedial hypothalamic nucleus	14/405	0.243056	0.999962	0	0	1.25392	1.77363	VAT1;RPL5;DLX1;CD63;FCER1G;RPS7;SDC2;CRABP1;SOX11;GNAI2;PCSK1N;TRIM28;PEG10;RPS12
Anterior hypothalamic nucleus	16/492	0.30054	0.999962	0	0	1.17622	1.41402	IFITM3;DLX1;GPX1;CADM1;MAGED1;USP11;PRRC2B;GNAI2;PCSK1N;PEG10;PNOC;NNAT;CANX;HNRNPD;FXYD6;RPS21
AOB, granular layer	10/301	0.332063	0.999962	0	0	1.20093	1.32394	IL1RN;CDKN1A;BTG1;RAB31;IL1B;DCX;TREM2;INHBA;SOX4;SMARCA4
Ansiform lobule	10/301	0.332063	0.999962	0	0	1.20093	1.32394	CADM3;BTG1;PTPRZ1;UBN2;ZIC1;STMN2;TNC;ATN1;VIM;ZFP36L1
Anterior cingulate area, dorsal part, layer 6b	10/301	0.332063	0.999962	0	0	1.20093	1.32394	YWHAE;SCRN1;PPP2R1A;COL6A1;GRIK3;MYO5A;CPE;LSS;SREBF2;SEPT3
Anteromedial visual area, layer 5	10/301	0.332063	0.999962	0	0	1.20093	1.32394	SPAG9;CDKN1A;TNRC18;MAPT;PTN;HMGCR;YWHAZ;GAPDH;DUSP6;SMARCA4
Anteromedial visual area, layer 6b	10/301	0.332063	0.999962	0	0	1.20093	1.32394	CAP1;NTRK2;CDKN1A;PTPRS;ZMIZ1;YWHAB;COL6A1;HMGCR;PHLDA1;GLTSCR2
Cerebellar cortex	10/301	0.332063	0.999962	0	0	1.20093	1.32394	CADM3;BTG1;PTPRZ1;UBN2;ZIC1;TNC;ATN1;VIM;A2M;ZFP36L1
Cerebellum	10/301	0.332063	0.999962	0	0	1.20093	1.32394	CADM3;BTG1;PTPRZ1;UBN2;ZIC1;TNC;ATN1;VIM;A2M;ZFP36L1
Copula pyramidis	10/301	0.332063	0.999962	0	0	1.20093	1.32394	CADM3;BTG1;ZMIZ1;UBN2;ITGB2;ZIC1;ATN1;VIM;A2M;ZFP36L1
Copula pyramidis, granular layer	10/301	0.332063	0.999962	0	0	1.20093	1.32394	CADM3;BTG1;UBN2;ITGB2;ZIC1;ALOX5AP;ATN1;VIM;A2M;ZFP36L1
Crus 2, molecular layer	10/301	0.332063	0.999962	0	0	1.20093	1.32394	CADM3;BTG1;PTPRZ1;ZMIZ1;UBN2;ZIC1;STMN2;TNC;ATN1;ZFP36L1
Endopiriform nucleus	10/301	0.332063	0.999962	0	0	1.20093	1.32394	CAP1;GNAO1;ACTR2;TYROBP;GNG2;RPL21;CHL1;ISLR2;HMGCR;VAMP2
Hemispheric regions	10/301	0.332063	0.999962	0	0	1.20093	1.32394	CADM3;BTG1;PTPRZ1;UBN2;ZIC1;TNC;ATN1;VIM;A2M;ZFP36L1
Infralimbic area, layer 6b	10/301	0.332063	0.999962	0	0	1.20093	1.32394	TOP2A;RPL5;CDH2;PPP2R1A;COL6A1;GRIK3;S100A6;CPE;SEPT2;SEPT3
Interanterodorsal nucleus of the thalamus	10/301	0.332063	0.999962	0	0	1.20093	1.32394	SOX2;RAB3C;RIMS3;GPX1;SDC2;RGS16;ZIC1;CTNNB1;L1CAM;AP2M1
JcPV part of the periaqueductal gray	10/301	0.332063	0.999962	0	0	1.20093	1.32394	SQLE;SYT4;CCND1;DPYSL2;RPL27A;ATP5A1;FXYD6;AGRN;PRDX6;VAMP2
Lateral septal nucleus	10/301	0.332063	0.999962	0	0	1.20093	1.32394	SOX2;DLX1;SYT4;RGS2;ALCAM;SERPINE2;PNOC;ZIC1;SOX4;XPR1
Lateral septal nucleus, caudal (caudodorsal) part	10/301	0.332063	0.999962	0	0	1.20093	1.32394	SOX2;MMP14;RGS2;PNOC;ENC1;ZIC1;DBI;TREM2;PTN;B2M
Main olfactory bulb, glomerular layer	10/301	0.332063	0.999962	0	0	1.20093	1.32394	IFITM3;IL1RN;FCER1G;IL1B;FABP7;DCX;PLIN2;TREM2;INHBA;SOX4
Major island of Calleja	10/301	0.332063	0.999962	0	0	1.20093	1.32394	TOP2A;SYT4;ALCAM;TSC22D1;HNRNPH1;PEG10;COL6A1;DCX;GAPDH;XPR1
Medial amygdalar nucleus, posterodorsal part, sublayer c	10/301	0.332063	0.999962	0	0	1.20093	1.32394	FADS2;TTR;CHL1;PNOC;DNER;NR2F1;DBI;XPR1;PRRC2A;PRPH
Medial pretectal area	10/301	0.332063	0.999962	0	0	1.20093	1.32394	IFITM3;CD63;FADS2;SDC2;FABP7;TXNIP;DBI;VIM;PRDX6;PRRC2A
Nucleus of the lateral olfactory tract, layer 3	10/301	0.332063	0.999962	0	0	1.20093	1.32394	TUBA1B;MARCKSL1;RPS19;NR2F1;GNAS;STMN3;HDGF;TRIB2;PHLDA1;AP2M1
Nucleus of the lateral olfactory tract, pyramidal layer	10/301	0.332063	0.999962	0	0	1.20093	1.32394	ACAP3;ACTR2;MARCKSL1;RPL21;SCRN1;PSAP;STMN3;HDGF;CXCL13;AP2M1
Nucleus of the posterior commissure	10/301	0.332063	0.999962	0	0	1.20093	1.32394	RAB3C;RIMS3;YWHAQ;RGS16;TNC;S100A4;L1CAM;AGRN;PFDN5;IER3
OB glomerular layer	10/301	0.332063	0.999962	0	0	1.20093	1.32394	IFITM3;IL1RN;FCER1G;IL1B;FABP7;DCX;PLIN2;TREM2;INHBA;SOX4
Olfactory areas	10/301	0.332063	0.999962	0	0	1.20093	1.32394	IL1RN;CDKN1A;IL1B;FABP7;DCX;PLIN2;TREM2;INHBA;SOX4;VAMP2
Orbital area, lateral part, layer 6a	10/301	0.332063	0.999962	0	0	1.20093	1.32394	TMEFF1;ACAP3;NGRN;IL1RN;TYROBP;LRP1;RPS18;MYO5A;SREBF2;MTDH
Parabrachial nucleus, lateral division, external lateral part	10/301	0.332063	0.999962	0	0	1.20093	1.32394	VAT1;SQLE;SYT4;SPARC;RPS18;PRDX1;RPS20;NCAM1;L1CAM;SAT1
Parabrachial nucleus, lateral division, ventral lateral part	10/301	0.332063	0.999962	0	0	1.20093	1.32394	VAT1;SPARC;RPS18;PRDX1;LAPTM5;RPS20;NCAM1;SAT1;ATP9A;GNAI2
Paramedian lobule, granular layer	10/301	0.332063	0.999962	0	0	1.20093	1.32394	CADM3;BTG1;PTPRZ1;UBN2;ZIC1;TNC;ATN1;VIM;A2M;ZFP36L1
Paraventricular nucleus of the thalamus	10/301	0.332063	0.999962	0	0	1.20093	1.32394	SOX2;CD63;RAB3C;DPYSL5;SDC2;FASN;RGS16;ZIC1;CTNNB1;L1CAM
Perireunensis nucleus	10/301	0.332063	0.999962	0	0	1.20093	1.32394	SOX2;RAB3C;RIMS3;DPYSL5;RGS16;PNOC;CTNNB1;L1CAM;AGRN;CLASP2
Primary somatosensory area, upper limb, layer 6a	10/301	0.332063	0.999962	0	0	1.20093	1.32394	TMEFF1;ACAP3;LASP1;LRP1;KIF5C;PPT1;MYO5A;CD14;PTN;SYT13
Primary visual area, layer 5	10/301	0.332063	0.999962	0	0	1.20093	1.32394	CDKN1A;LASP1;TRIO;CCL20;TNRC18;PTN;HMGCR;DUSP6;GLTSCR2;TPT1
Purkinje cell layer of CbHCx	10/301	0.332063	0.999962	0	0	1.20093	1.32394	CADM3;BTG1;PTPRZ1;UBN2;ZIC1;TNC;ATN1;VIM;A2M;ZFP36L1
Retrosplenial area, dorsal part, layer 6b	10/301	0.332063	0.999962	0	0	1.20093	1.32394	HSPA8;NTRK2;CDKN1A;TUBA1B;ZMIZ1;CNBP;MAPT;HMGCR;KLC1;GLTSCR2
Simple lobule, molecular layer	10/301	0.332063	0.999962	0	0	1.20093	1.32394	CADM3;BTG1;PTPRZ1;UBN2;ZIC1;TNC;ATN1;VIM;A2M;ZFP36L1
Striatum-like amygdalar nuclei	10/301	0.332063	0.999962	0	0	1.20093	1.32394	SOX2;RPS19;RPL21;CHL1;PNOC;NR2F1;TRIB2;AP2M1;XPR1;PRPH
anterior nuclei	10/301	0.332063	0.999962	0	0	1.20093	1.32394	CD63;GPX1;TTR;RGS16;ITGB2;ZIC1;DBI;L1CAM;LSS;CNN3
anteroventral nucleus	10/301	0.332063	0.999962	0	0	1.20093	1.32394	CD63;GPX1;TTR;RGS16;IGFBP2;ITGB2;DBI;HSPG2;LSS;CNN3
cerebellar hemisphere	10/301	0.332063	0.999962	0	0	1.20093	1.32394	CADM3;BTG1;PTPRZ1;UBN2;ZIC1;TNC;ATN1;VIM;A2M;ZFP36L1
core part of the anterobasal nucleus	10/301	0.332063	0.999962	0	0	1.20093	1.32394	IFITM3;PCSK1N;TRIM28;RPS7;RGS1;PEG10;SDC2;CRABP1;HNRNPD;GNAI2
dorsal part of alar p3	10/301	0.332063	0.999962	0	0	1.20093	1.32394	SOX2;CD63;GPX1;TTR;SDC2;RGS16;ZIC1;DBI;L1CAM;XPR1
dorsal peduncular cortex, intermediate part	10/301	0.332063	0.999962	0	0	1.20093	1.32394	TOP2A;CDH2;COL6A1;GRIK3;DCX;FLNA;CDH13;SOX4;VAMP2;SEPT2
granule cell layer of the DG	10/301	0.332063	0.999962	0	0	1.20093	1.32394	HNRNPM;RPS7;PKIA;RPL22;RPLP0;ISLR2;FAU;PFN1;XPR1;RPS12
hilus of the DG	10/301	0.332063	0.999962	0	0	1.20093	1.32394	HNRNPM;GNG2;RPS7;RPL31;RPL22;RPLP0;ISLR2;FAU;PFN1;XPR1
intermediate part of THyB	10/301	0.332063	0.999962	0	0	1.20093	1.32394	CD63;DLX1;PCSK1N;FCER1G;TRIM28;SDC2;RPL12;CRABP1;S100A6;SOX11
intermediate stratum of Hb	10/301	0.332063	0.999962	0	0	1.20093	1.32394	CD63;SCRN1;DPYSL5;SDC2;FABP7;RGS16;ZIC1;TNC;CTNNB1;L1CAM
intermediate stratum of ITTh	10/301	0.332063	0.999962	0	0	1.20093	1.32394	RIMS3;YWHAQ;RGS16;TNC;S100A4;L1CAM;NR3C1;LSS;IER3;YWHAH
intermediate stratum of PThE	10/301	0.332063	0.999962	0	0	1.20093	1.32394	SOX2;CD63;GPX1;TTR;SDC2;RGS16;ZIC1;DBI;L1CAM;XPR1
intermediate stratum of THyB-P	10/301	0.332063	0.999962	0	0	1.20093	1.32394	PCSK1N;FCER1G;TRIM28;DPYSL5;RPL12;CANX;S100A6;GNAS;SOX11;RPL37
intermediate stratum of TTe	10/301	0.332063	0.999962	0	0	1.20093	1.32394	TOP2A;CDH2;COL6A1;GRIK3;DCX;FLNA;CDH13;SOX4;VAMP2;SEPT2
intermediate stratum of p3B	10/301	0.332063	0.999962	0	0	1.20093	1.32394	SERPINE2;RPS8;SDC2;IL1B;RPL35A;EBF3;TMBIM6;RPS21;LSS;VAMP2
intermediate stratum of r6Lim	10/301	0.332063	0.999962	0	0	1.20093	1.32394	ACLY;LGALS1;RPL12;MSN;SNCG;SOX11;TAGLN2;LCP1;LSS;S100A10
lateral part of r1B	10/301	0.332063	0.999962	0	0	1.20093	1.32394	VAT1;ACLY;RPS18;PEG10;PRDX1;IGFBP3;PLXNA1;SNCG;PLIN2;S100A10
lateral preoptic area, PO1 part	10/301	0.332063	0.999962	0	0	1.20093	1.32394	RPS15;VAT1;NRG4;PEG10;PNOC;STMN3;UBA1;RPS21;AP2M1;SMARCA4
layer 6 of RSC	10/301	0.332063	0.999962	0	0	1.20093	1.32394	CAP1;GNG2;CHL1;FASN;COL6A1;NR2F1;CTNNB1;NR3C1;PAFAH1B1;PRPH
mantle zone of CbH	10/301	0.332063	0.999962	0	0	1.20093	1.32394	CADM3;BTG1;PTPRZ1;UBN2;ZIC1;TNC;ATN1;VIM;A2M;ZFP36L1
mantle zone of PThE	10/301	0.332063	0.999962	0	0	1.20093	1.32394	SOX2;CD63;GPX1;TTR;SDC2;RGS16;ZIC1;DBI;L1CAM;XPR1
mantle zone of SePal	10/301	0.332063	0.999962	0	0	1.20093	1.32394	RGS2;ALCAM;TSC22D1;NRG4;PEG10;SDC2;CRABP1;COL6A1;DCX;PHLDA1
mantle zone of SeStr	10/301	0.332063	0.999962	0	0	1.20093	1.32394	TOP2A;RGS2;ALCAM;SERPINE2;COL6A1;DCX;SOX11;ATP2B1;PHLDA1;SOX4
mantle zone of THyB-I	10/301	0.332063	0.999962	0	0	1.20093	1.32394	CD63;DLX1;PCSK1N;FCER1G;TRIM28;SDC2;RPL12;CRABP1;S100A6;SOX11
mantle zone of r1BL	10/301	0.332063	0.999962	0	0	1.20093	1.32394	VAT1;ACLY;RPS18;PEG10;PRDX1;IGFBP3;PLXNA1;SNCG;PLIN2;S100A10
molecular layer of CbHCx	10/301	0.332063	0.999962	0	0	1.20093	1.32394	CADM3;BTG1;PTPRZ1;UBN2;ZIC1;TNC;ATN1;VIM;A2M;ZFP36L1
nucleus of the stria medullaris (prethalamic)	10/301	0.332063	0.999962	0	0	1.20093	1.32394	SOX2;CD63;GPX1;TTR;SDC2;RGS16;ZIC1;DBI;L1CAM;XPR1
pallium	10/301	0.332063	0.999962	0	0	1.20093	1.32394	IL1RN;MEF2C;ENC1;GNB1;DCX;CELF5;PTN;INHBA;HMGCR;DUSP6
paraseptal subpallium	10/301	0.332063	0.999962	0	0	1.20093	1.32394	TOP2A;RGS2;ALCAM;SERPINE2;PEG10;CRABP1;COL6A1;DCX;PHLDA1;SOX4
parvicellular interstitial nucleus of the posterior commissure	10/301	0.332063	0.999962	0	0	1.20093	1.32394	IFITM3;FADS2;TUBA1A;TXNIP;RPL27;FAU;AGRN;PRDX6;PFDN5;YWHAG
periventricular stratum of AOB	10/301	0.332063	0.999962	0	0	1.20093	1.32394	IL1RN;CDKN1A;BTG1;RAB31;IL1B;DCX;TREM2;INHBA;SOX4;SMARCA4
periventricular stratum of DTTh	10/301	0.332063	0.999962	0	0	1.20093	1.32394	SOX2;RAB3C;RIMS3;DPYSL5;RGS16;ZIC1;LAPTM5;CTNNB1;MAPT;L1CAM
periventricular stratum of JcPV	10/301	0.332063	0.999962	0	0	1.20093	1.32394	SQLE;SYT4;CCND1;DPYSL2;RPL27A;ATP5A1;FXYD6;AGRN;PRDX6;VAMP2
periventricular stratum of TPaA	10/301	0.332063	0.999962	0	0	1.20093	1.32394	SOX2;DLX1;PCSK1N;PEG10;RGS16;NNAT;TXNIP;FXYD6;CXCL13;RPL19
periventricular stratum of isBL	10/301	0.332063	0.999962	0	0	1.20093	1.32394	VAT1;ACLY;RPS28;RGS2;DPYSL5;RPL12;RPS6;RPL37A;NCAM1;S100A10
posteromedial visual area, layer 2/3	10/301	0.332063	0.999962	0	0	1.20093	1.32394	IFITM3;NGRN;CDKN1A;TRIM28;TNRC18;S100A4;HMGCR;DCLK1;DUSP6;GLTSCR2
posteromedial visual area, layer 5	10/301	0.332063	0.999962	0	0	1.20093	1.32394	IFITM3;NTRK2;CDKN1A;TUBA1B;LRP1;TNRC18;PTN;HMGCR;DUSP6;GLTSCR2
prethalamic eminence	10/301	0.332063	0.999962	0	0	1.20093	1.32394	SOX2;CD63;GPX1;TTR;SDC2;RGS16;ZIC1;DBI;L1CAM;XPR1
r1 alar plate	10/301	0.332063	0.999962	0	0	1.20093	1.32394	CADM3;BTG1;PTPRZ1;UBN2;ZIC1;TNC;ATN1;VIM;A2M;ZFP36L1
r6 part of ventral parvicellular reticular formation	10/301	0.332063	0.999962	0	0	1.20093	1.32394	ACLY;LGALS1;RPL12;MSN;SNCG;SOX11;TAGLN2;LCP1;LSS;S100A10
r8 portion of the hypoglossal motor nucleus	10/301	0.332063	0.999962	0	0	1.20093	1.32394	ACLY;CD164;LGALS1;GPX1;RPL12;IGFBP3;MSN;AMPD3;FAU;S100A10
rostral paraventricular nucleus	10/301	0.332063	0.999962	0	0	1.20093	1.32394	SOX2;DLX1;PCSK1N;PEG10;RGS16;NNAT;TXNIP;FXYD6;CXCL13;RPL19
septopallidal transition area	10/301	0.332063	0.999962	0	0	1.20093	1.32394	RGS2;ALCAM;TSC22D1;NRG4;PEG10;SDC2;CRABP1;COL6A1;DCX;PHLDA1
septostriatal transition area (accumbens)	10/301	0.332063	0.999962	0	0	1.20093	1.32394	TOP2A;RGS2;ALCAM;SERPINE2;COL6A1;DCX;SOX11;ATP2B1;PHLDA1;SOX4
shell of VMH	10/301	0.332063	0.999962	0	0	1.20093	1.32394	VAT1;CD63;DLX1;PCSK1N;TRIM28;RPS7;PEG10;SDC2;CRABP1;CXCL13
sublayer 6b of FCx	10/301	0.332063	0.999962	0	0	1.20093	1.32394	TMEFF1;ACAP3;LRP1;PPP2R1A;FASN;COL6A1;GRIK3;MYO5A;SYT13;NR3C1
sublayer 6b of PCx	10/301	0.332063	0.999962	0	0	1.20093	1.32394	TMEFF1;PTPRS;LRP1;YWHAB;FOXG1;COL6A1;MYO5A;HMGCR;SYT13;NR3C1
subpallial septum	10/301	0.332063	0.999962	0	0	1.20093	1.32394	SOX2;SYT4;RGS2;ALCAM;PEG10;PNOC;ZIC1;COL6A1;XPR1;GNAI2
superficial stratum of r6Lim	10/301	0.332063	0.999962	0	0	1.20093	1.32394	ACLY;LGALS1;NRG4;RPL12;MSN;SOX11;HLA-A;LSS;EIF4B;S100A10
upper dorsal lateral hypothalamic area	10/301	0.332063	0.999962	0	0	1.20093	1.32394	RPS15;VAT1;RAB31;GPX1;PEG10;LAPTM5;TMBIM6;RPS21;NDRG1;QKI
ventral endopiriform nucleus	10/301	0.332063	0.999962	0	0	1.20093	1.32394	GNAO1;TYROBP;FOXG1;DNER;PTN;HMGCR;VAMP2;AP2M1;ACTG1;PRPH
ventrolateral part of VMH	10/301	0.332063	0.999962	0	0	1.20093	1.32394	VAT1;DLX1;PCSK1N;FCER1G;RPS19;TRIM28;PEG10;SDC2;STMN3;CXCL13
Rhomboid nucleus	11/345	0.369099	0.999962	0	0	1.15047	1.14666	SOX2;RAB3C;RIMS3;DPYSL5;RGS16;ZIC1;LAPTM5;CTNNB1;EVL;L1CAM;AGRN
Anterior tegmental nucleus	17/552	0.373082	0.999962	0	0	1.1105	1.09491	CSTB;RPL12;SDC2;AMPD3;YWHAZ;ZMPSTE24;ACLY;RPS28;TUBA1A;GNG2;SCRN1;YWHAQ;DPYSL5;FTH1;PNOC;NCAM1;S100A10
Anterodorsal nucleus	11/354	0.401121	0.999962	0	0	1.11975	1.02289	CD63;MMP14;GPX1;TTR;CD82;IGFBP2;ITGB2;DBI;VIM;WLS;CNN3
Facial motor nucleus	10/330	0.440418	0.999962	0	0	1.09044	0.894197	ACLY;LGALS1;NRG4;RPL12;MSN;SOX11;HLA-A;LSS;EIF4B;S100A10
Field CA3	10/336	0.462871	0.999962	0	0	1.07004	0.824256	GNAO1;RPS7;FOXG1;IGFBP3;RPL22;LAPTM5;ISLR2;PLXNA1;PFN1;VAMP2
Accessory olfactory bulb, granular layer	9/301	0.463982	0.999962	0	0	1.07512	0.825594	IL1RN;BTG1;RAB31;IL1B;DCX;TREM2;INHBA;SOX4;CNN3
Agranular insular area, ventral part	9/301	0.463982	0.999962	0	0	1.07512	0.825594	ACTR2;GRN;TYROBP;GNG2;PLAUR;ISLR2;ACTN4;HMGCR;PRPH
Anterior group of the dorsal thalamus	9/301	0.463982	0.999962	0	0	1.07512	0.825594	GPX1;TTR;CD82;RGS16;IGFBP2;ITGB2;ZIC1;CTNNB1;L1CAM
Anteromedial visual area, layer 4	9/301	0.463982	0.999962	0	0	1.07512	0.825594	CDKN1A;WDR82;TNRC18;PTN;HMGCR;FGFBP3;YWHAZ;GAPDH;DUSP6
Anteromedial visual area, layer 6a	9/301	0.463982	0.999962	0	0	1.07512	0.825594	NGRN;CDKN1A;PTPRS;MYO5A;TNRC18;SYP;HMGCR;KLC1;GLTSCR2
Basomedial amygdalar nucleus, anterior part	9/301	0.463982	0.999962	0	0	1.07512	0.825594	PCSK1N;CDH2;CHL1;DNER;NR2F1;GNAS;TRIB2;AP2M1;PRPH
Central linear nucleus raphe	9/301	0.463982	0.999962	0	0	1.07512	0.825594	TMEFF1;GNG2;YWHAQ;SCRN1;SDC2;PNOC;AMPD3;AP2M1;S100A10
Cortical amygdalar area, posterior part, medial zone, layer 3	9/301	0.463982	0.999962	0	0	1.07512	0.825594	MARCKSL1;TSC22D1;RPS7;PKIA;PEA15;NR2F1;CDH13;HDGF;AP2M1
Crus 1	9/301	0.463982	0.999962	0	0	1.07512	0.825594	BTG1;PTPRZ1;UBN2;ZIC1;STMN2;TNC;ATN1;VIM;ZFP36L1
Crus 1, granular layer	9/301	0.463982	0.999962	0	0	1.07512	0.825594	CADM3;BTG1;PTPRZ1;UBN2;ZIC1;TNC;ATN1;VIM;ZFP36L1
Crus 1, molecular layer	9/301	0.463982	0.999962	0	0	1.07512	0.825594	BTG1;PTPRZ1;UBN2;ZIC1;STMN2;TNC;ATN1;VIM;ZFP36L1
Declive (VI)	9/301	0.463982	0.999962	0	0	1.07512	0.825594	CADM3;BTG1;PTPRZ1;UBN2;ZIC1;TNC;VIM;A2M;SEPT2
Declive (VI), granular layer	9/301	0.463982	0.999962	0	0	1.07512	0.825594	CADM3;BTG1;PTPRZ1;UBN2;ZIC1;TNC;VIM;A2M;SEPT2
Declive (VI), molecular layer	9/301	0.463982	0.999962	0	0	1.07512	0.825594	CADM3;BTG1;PTPRZ1;UBN2;ZIC1;TNC;VIM;A2M;SEPT2
Field CA3, stratum pyramidale	9/301	0.463982	0.999962	0	0	1.07512	0.825594	GNAO1;RPS7;FOXG1;IGFBP3;LAPTM5;ISLR2;PLXNA1;PFN1;VAMP2
Gustatory areas, layer 5	9/301	0.463982	0.999962	0	0	1.07512	0.825594	TMEFF1;ACTR2;LASP1;TYROBP;PPT1;PLAUR;ACTN4;FDFT1;PRPH
Gustatory areas, layer 6b	9/301	0.463982	0.999962	0	0	1.07512	0.825594	GNAO1;TYROBP;GNG2;YWHAB;ACTN4;SREBF2;XPR1;IER3;PRPH
Hypoglossal nucleus	9/301	0.463982	0.999962	0	0	1.07512	0.825594	ACLY;LGALS1;GPX1;RPL12;MSN;TAGLN2;S100A10;FDFT1;PRPH
Hypothalamic lateral zone	9/301	0.463982	0.999962	0	0	1.07512	0.825594	RPS15;VAT1;PEG10;CRABP1;PNOC;FXYD6;TMBIM6;RPS21;GNAI2
Intercalated amygdalar nucleus	9/301	0.463982	0.999962	0	0	1.07512	0.825594	TMEFF1;RPL21;CHL1;NR2F1;AP2M1;WLS;GNAI2;ACTG1;PRPH
Intermediodorsal nucleus of the thalamus	9/301	0.463982	0.999962	0	0	1.07512	0.825594	IFITM3;RAB3C;RIMS3;DPYSL5;RGS16;CTNNB1;EVL;NMNAT2;L1CAM
Intralaminar nuclei of the dorsal thalamus	9/301	0.463982	0.999962	0	0	1.07512	0.825594	RAB3C;RIMS3;DPYSL5;RGS16;TNC;CTNNB1;EVL;L1CAM;AGRN
Lateral preoptic area	9/301	0.463982	0.999962	0	0	1.07512	0.825594	VAT1;SYT4;PEG10;USP11;PNOC;NNAT;FXYD6;RPS21;GNAI2
Lateral septal complex	9/301	0.463982	0.999962	0	0	1.07512	0.825594	SOX2;DLX1;SYT4;RGS2;PNOC;ZIC1;PTN;SOX4;XPR1
Main olfactory bulb	9/301	0.463982	0.999962	0	0	1.07512	0.825594	IL1RN;CDKN1A;IL1B;FABP7;DCX;PLIN2;TREM2;INHBA;SOX4
Main olfactory bulb, outer plexiform layer	9/301	0.463982	0.999962	0	0	1.07512	0.825594	IL1RN;CDKN1A;IL1B;FABP7;DCX;PLIN2;TREM2;INHBA;SOX4
Medial amygdalar nucleus, posterodorsal part	9/301	0.463982	0.999962	0	0	1.07512	0.825594	FADS2;TTR;RPL21;CHL1;PNOC;DNER;NR2F1;CDH13;DBN1
Mus musculus	9/301	0.463982	0.999962	0	0	1.07512	0.825594	MEF2C;BTG1;FABP7;ENC1;ZIC1;TNC;CELF5;A2M;DUSP6
Nodulus (X), granular layer	9/301	0.463982	0.999962	0	0	1.07512	0.825594	CD63;TTR;IGFBP3;ITGB2;TXNIP;TREM2;VIM;A2M;HSPG2
Nucleus of Darkschewitsch	9/301	0.463982	0.999962	0	0	1.07512	0.825594	VAT1;ACLY;PNOC;EBF3;TIMP1;TKT;AGRN;LSS;VAMP2
Nucleus of Roller	9/301	0.463982	0.999962	0	0	1.07512	0.825594	ACLY;CD164;SYT4;LGALS1;RPL12;IGFBP3;MSN;FAU;S100A10
OB outer plexiform layer	9/301	0.463982	0.999962	0	0	1.07512	0.825594	IL1RN;CDKN1A;IL1B;FABP7;DCX;PLIN2;TREM2;INHBA;SOX4
Parataenial nucleus	9/301	0.463982	0.999962	0	0	1.07512	0.825594	SOX2;RAB3C;SDC2;RGS16;ZIC1;CTNNB1;DBI;L1CAM;AP2M1
Pedunculopontine nucleus	9/301	0.463982	0.999962	0	0	1.07512	0.825594	CSTB;YWHAQ;RPS18;PEG10;RPS6;PLXNA1;SNCG;RPL35A;RPS20
Posterior parietal association areas, layer 6b	9/301	0.463982	0.999962	0	0	1.07512	0.825594	NGRN;CDKN1A;PTPRS;FOXG1;MYO5A;HMGCR;PFN1;NR3C1;DUSP6
Precommissural nucleus	9/301	0.463982	0.999962	0	0	1.07512	0.825594	IFITM3;SQLE;CD63;FADS2;YWHAQ;DPYSL5;SDC2;FABP7;TNC
Primary somatosensory area, trunk, layer 6a	9/301	0.463982	0.999962	0	0	1.07512	0.825594	LASP1;TRIO;PTPRS;LRP1;PPT1;MYO5A;PTN;HMGCR;SYT13
Primary visual area, layer 6a	9/301	0.463982	0.999962	0	0	1.07512	0.825594	CDKN1A;LASP1;COL6A1;MYO5A;HMGCR;SYT13;NR3C1;DUSP6;GLTSCR2
Secondary motor area, layer 6b	9/301	0.463982	0.999962	0	0	1.07512	0.825594	TMEFF1;ACTR2;SCRN1;LRP1;PPP2R1A;GRIK3;MYO5A;SREBF2;SEPT3
Subceruleus nucleus	9/301	0.463982	0.999962	0	0	1.07512	0.825594	VAT1;CSTB;PEG10;PLXNA1;SNCG;AP2M1;SEPT2;S100A10;FDFT1
Ventromedial hypothalamic nucleus, anterior part	9/301	0.463982	0.999962	0	0	1.07512	0.825594	PCSK1N;TUBA1A;RPL10;USP11;CRABP1;HNRNPD;PLAUR;PRRC2B;GNAI2
Ventromedial hypothalamic nucleus, ventrolateral part	9/301	0.463982	0.999962	0	0	1.07512	0.825594	VAT1;DLX1;PCSK1N;FCER1G;TRIM28;PEG10;SDC2;CRABP1;STMN3
bed nucleus of the external capsule	9/301	0.463982	0.999962	0	0	1.07512	0.825594	CAP1;GNAO1;ACTR2;TYROBP;GNG2;SCRN1;CDH13;HMGCR;SREBF2
bed nucleus of the stria terminalis, mediocentral division	9/301	0.463982	0.999962	0	0	1.07512	0.825594	RGS2;RAB31;GPX1;TTR;PEG10;CRABP1;COL6A1;SOX4;GNAI2
caudate nucleus	9/301	0.463982	0.999962	0	0	1.07512	0.825594	TOP2A;RGS2;RAB31;TTR;SERPINE2;CD82;COL6A1;GPC2;SOX11
central amygdaloid nucleus, medial part	9/301	0.463982	0.999962	0	0	1.07512	0.825594	RGS2;GPX1;RPL21;CHL1;PABPC4;MSN;PLIN2;LSS;PRPH
centromedian nucleus	9/301	0.463982	0.999962	0	0	1.07512	0.825594	SOX2;RAB3C;RIMS3;DPYSL5;RGS16;LAPTM5;CTNNB1;EVL;L1CAM
hypothalamic amygdala	9/301	0.463982	0.999962	0	0	1.07512	0.825594	MARCKSL1;RPS19;RPL21;CHL1;PNOC;DNER;NR2F1;TRIB2;AP2M1
intermediate isthmic part of the dorsal raphe nucleus	9/301	0.463982	0.999962	0	0	1.07512	0.825594	VAT1;ACLY;RGS2;DPYSL5;RPS6;RPL37A;NCAM1;S100A10;FDFT1
intermediate stratum of APal	9/301	0.463982	0.999962	0	0	1.07512	0.825594	RGS2;GPX1;RPL21;CHL1;PABPC4;MSN;PLIN2;LSS;PRPH
intermediate stratum of LPrP	9/301	0.463982	0.999962	0	0	1.07512	0.825594	GNAO1;ACTR2;TYROBP;GNG2;YWHAB;ISLR2;HMGCR;SREBF2;IER3
intermediate stratum of SePal	9/301	0.463982	0.999962	0	0	1.07512	0.825594	TOP2A;RGS2;ALCAM;TSC22D1;PEG10;CRABP1;COL6A1;DCX;PHLDA1
intermediate stratum of isBL	9/301	0.463982	0.999962	0	0	1.07512	0.825594	SYT4;RPS18;PEG10;RPL12;PLXNA1;SNCG;EBF3;RPS20;NCAM1
intermediate stratum of p2ZL	9/301	0.463982	0.999962	0	0	1.07512	0.825594	RAB3C;RIMS3;GPX1;IL1B;RGS16;NR2F1;RPL27;L1CAM;SAT1
intermediate tier of thalamus	9/301	0.463982	0.999962	0	0	1.07512	0.825594	RIMS3;RGS16;ZIC1;TNC;CTNNB1;S100A4;L1CAM;NR3C1;LSS
internal granular layer of CbVCx	9/301	0.463982	0.999962	0	0	1.07512	0.825594	CADM3;BTG1;PTPRZ1;UBN2;ZIC1;TNC;ATN1;VIM;A2M
interstitial nucleus of the zona limitans	9/301	0.463982	0.999962	0	0	1.07512	0.825594	RAB3C;RIMS3;GPX1;IL1B;RGS16;NR2F1;RPL27;L1CAM;SAT1
isthmic part of basolateral isthmic reticular formation	9/301	0.463982	0.999962	0	0	1.07512	0.825594	SYT4;RPS18;PEG10;RPL12;PLXNA1;SNCG;EBF3;RPS20;NCAM1
isthmic part of mesencephalic trigeminal nucleus	9/301	0.463982	0.999962	0	0	1.07512	0.825594	ACLY;RPS18;PEG10;PLXNA1;MSN;SNCG;RPS20;NCAM1;GNAI2
lateral septal nucleus, intermedio-dorsal part	9/301	0.463982	0.999962	0	0	1.07512	0.825594	SOX2;SYT4;RGS2;ALCAM;PNOC;ZIC1;COL6A1;XPR1;ITM2C
lateral subhabenular nucleus	9/301	0.463982	0.999962	0	0	1.07512	0.825594	YWHAQ;SCRN1;DPYSL5;SDC2;RGS16;TNC;CTNNB1;L1CAM;CXCL13
laterostriatal stripe	9/301	0.463982	0.999962	0	0	1.07512	0.825594	CAP1;GNAO1;RGS2;SERPINE2;CHL1;TREM2;HMGCR;ATP2B1;PRPH
layer 2 of AOV cortex	9/301	0.463982	0.999962	0	0	1.07512	0.825594	IL1RN;COL6A1;DCX;PTN;INHBA;YBX1;SOX4;VAMP2;AP2M1
layer 2 of VPrP cortex	9/301	0.463982	0.999962	0	0	1.07512	0.825594	ACTR2;TYROBP;EEF1A2;SERINC1;PTN;CKB;HMGCR;SOX4;AP2M1
layer 3 of InsCx	9/301	0.463982	0.999962	0	0	1.07512	0.825594	ACTR2;IL1RN;GRN;GNG2;LAPTM5;PLAUR;HDGF;PTN;TRIB2
layer 3 of OCx	9/301	0.463982	0.999962	0	0	1.07512	0.825594	CDKN1A;TNRC18;HLA-A;PTN;HMGCR;NR3C1;DCLK1;DUSP6;SMARCA4
layer 6 of CCx	9/301	0.463982	0.999962	0	0	1.07512	0.825594	SQLE;TMEFF1;GRIK3;MYO5A;HMGCR;DUSP6;SREBF2;VAMP2;SEPT3
layer 6b of RSC	9/301	0.463982	0.999962	0	0	1.07512	0.825594	CAP1;CHL1;FASN;COL6A1;NR2F1;CTNNB1;HDGF;NR3C1;PAFAH1B1
m1Lim (VL) part of the periaqueductal gray	9/301	0.463982	0.999962	0	0	1.07512	0.825594	CSTB;RPL30;PEG10;PNOC;SNCG;EBF3;MAPT;PRDX6;AP2M1
mantle zone of AHy	9/301	0.463982	0.999962	0	0	1.07512	0.825594	MARCKSL1;RPS19;RPL21;CHL1;PNOC;DNER;NR2F1;TRIB2;AP2M1
mantle zone of ITTh	9/301	0.463982	0.999962	0	0	1.07512	0.825594	RIMS3;RGS16;ZIC1;TNC;CTNNB1;S100A4;L1CAM;NR3C1;LSS
mantle zone of PHyB-V	9/301	0.463982	0.999962	0	0	1.07512	0.825594	SOX2;MARCKSL1;PEG10;SDC2;FXYD6;NCAM1;TIMP1;VIM;GNAI2
mantle zone of SeDg	9/301	0.463982	0.999962	0	0	1.07512	0.825594	VAT1;RGS2;NRG4;PEG10;CRABP1;COL6A1;NNAT;RPS21;GNAI2
mantle zone of TTe	9/301	0.463982	0.999962	0	0	1.07512	0.825594	TOP2A;FCER1G;GDF15;COL6A1;DCX;FLNA;CDH13;SOX4;NEUROG2
mantle zone of p2ZL	9/301	0.463982	0.999962	0	0	1.07512	0.825594	RAB3C;RIMS3;GPX1;RGS16;NR2F1;MYO5A;RPL27;L1CAM;LSS
medial amygdala, posterodorsal part	9/301	0.463982	0.999962	0	0	1.07512	0.825594	RPL21;CHL1;PNOC;DNER;NR2F1;CDH13;DBN1;AP2M1;XPR1
neural plate	9/301	0.463982	0.999962	0	0	1.07512	0.825594	MEF2C;BTG1;FABP7;ENC1;ZIC1;TNC;CELF5;A2M;DUSP6
p3 part of the ZL core	9/301	0.463982	0.999962	0	0	1.07512	0.825594	RAB3C;RAB31;GPX1;SDC2;RGS16;NR2F1;MYO5A;L1CAM;SAT1
p3 portion of the substantia nigra pars compacta	9/301	0.463982	0.999962	0	0	1.07512	0.825594	VAT1;SLC38A1;YWHAQ;RGS1;SDC2;SNCG;EBF3;CXCL13;VAMP2
periventricular stratum of Dg	9/301	0.463982	0.999962	0	0	1.07512	0.825594	RGS2;RAB31;GPX1;TTR;PEG10;CRABP1;COL6A1;SOX4;GNAI2
periventricular stratum of OB	9/301	0.463982	0.999962	0	0	1.07512	0.825594	IL1RN;CDKN1A;BTG1;IL1B;FABP7;DCX;INHBA;SOX4;VAMP2
periventricular stratum of Str	9/301	0.463982	0.999962	0	0	1.07512	0.825594	TOP2A;RGS2;RAB31;TTR;SERPINE2;CD82;COL6A1;GPC2;SOX11
periventricular stratum of cerebellar vermis	9/301	0.463982	0.999962	0	0	1.07512	0.825594	CADM3;BTG1;PTPRZ1;UBN2;ZIC1;TNC;S100A4;VIM;A2M
periventricular stratum of isBI	9/301	0.463982	0.999962	0	0	1.07512	0.825594	VAT1;ACLY;RGS2;DPYSL5;RPS6;RPL37A;NCAM1;S100A10;FDFT1
periventricular stratum of m1AL	9/301	0.463982	0.999962	0	0	1.07512	0.825594	CSTB;SERPINE2;RPS8;STXBP1;TTC3;HMGA1;SNCG;EBF3;RPL26
periventricular stratum of m1Lim	9/301	0.463982	0.999962	0	0	1.07512	0.825594	CSTB;RPL30;PEG10;PNOC;SNCG;EBF3;MAPT;PRDX6;AP2M1
periventricular stratum of r10Lim	9/301	0.463982	0.999962	0	0	1.07512	0.825594	ACLY;LGALS1;GPX1;MSN;PLIN2;A2M;PRDX6;YWHAZ;S100A10
periventricular stratum of r7BM	9/301	0.463982	0.999962	0	0	1.07512	0.825594	CSTB;ACLY;RGS1;ITGB2;SNCG;LAMB1;TIMP1;FAU;S100A10
posteromedial visual area	9/301	0.463982	0.999962	0	0	1.07512	0.825594	IFITM3;NGRN;CDKN1A;WDR82;TNRC18;PTN;HMGCR;DUSP6;GLTSCR2
posteroventral part of alar p3	9/301	0.463982	0.999962	0	0	1.07512	0.825594	EEF1G;RAB3C;RAB31;GPX1;RPS8;RGS16;PNOC;TMBIM6;LSS
prepontine hindbrain	9/301	0.463982	0.999962	0	0	1.07512	0.825594	CADM3;BTG1;PTPRZ1;UBN2;ZIC1;TNC;VIM;A2M;ZFP36L1
r10 part of vagal motor nucleus	9/301	0.463982	0.999962	0	0	1.07512	0.825594	ACLY;LGALS1;GPX1;MSN;PLIN2;A2M;PRDX6;YWHAZ;S100A10
r10 portion of the hypoglossal motor nucleus	9/301	0.463982	0.999962	0	0	1.07512	0.825594	TOP2A;DNAJA1;ACLY;LGALS1;GPX1;MSN;PRDX6;YWHAZ;S100A10
r7 portion of ambiguous motor nucleus	9/301	0.463982	0.999962	0	0	1.07512	0.825594	ACLY;DLX1;SYT4;MSN;TAGLN2;HLA-A;LSS;EIF4B;S100A10
r7 portion of the hypoglossal motor nucleus	9/301	0.463982	0.999962	0	0	1.07512	0.825594	ACLY;SYT4;LGALS1;IGFBP3;ITGB2;MSN;LAMB1;FAU;S100A10
r9 part of nucleus gracilis	9/301	0.463982	0.999962	0	0	1.07512	0.825594	VAT1;GDF15;IGFBP3;TAGLN2;PLIN2;DBI;A2M;PRDX6;LSS
rhombomere 1	9/301	0.463982	0.999962	0	0	1.07512	0.825594	CADM3;BTG1;PTPRZ1;UBN2;ZIC1;TNC;VIM;A2M;ZFP36L1
rostral secondary prosencephalon	9/301	0.463982	0.999962	0	0	1.07512	0.825594	VAT1;DLX1;PCSK1N;TRIM28;PEG10;SDC2;CRABP1;CXCL13;RPS21
rostromedial tegmental nucleus	9/301	0.463982	0.999962	0	0	1.07512	0.825594	CSTB;GRN;FCER1G;RPS7;YWHAQ;SPP1;RPL37;L1CAM;AP2M1
septodiagonal transition area	9/301	0.463982	0.999962	0	0	1.07512	0.825594	VAT1;RGS2;NRG4;PEG10;CRABP1;COL6A1;NNAT;RPS21;GNAI2
subpallial amygdala	9/301	0.463982	0.999962	0	0	1.07512	0.825594	SOX2;RGS2;TTR;RPL21;CHL1;COL6A1;NR2F1;XPR1;PRPH
substantia nigra compacta, m1 part	9/301	0.463982	0.999962	0	0	1.07512	0.825594	IFITM3;VAT1;SDC2;PLXNA1;SNCG;L1CAM;LSS;VAMP2;AP2M1
superficial dorsofrontal area	9/301	0.463982	0.999962	0	0	1.07512	0.825594	HNRNPM;MORF4L1;RPL18A;TRIM2;UBN2;PLAUR;FAU;OAZ1;XPR1
superficial stratum of AHy	9/301	0.463982	0.999962	0	0	1.07512	0.825594	MARCKSL1;RPS19;RPL21;CHL1;PNOC;DNER;NR2F1;TRIB2;AP2M1
superficial stratum of OB	9/301	0.463982	0.999962	0	0	1.07512	0.825594	IFITM3;IL1RN;FCER1G;IL1B;FABP7;PLIN2;TREM2;INHBA;CNN3
superficial stratum of PCPD	9/301	0.463982	0.999962	0	0	1.07512	0.825594	HNRNPM;MORF4L1;RPL18A;TRIM2;UBN2;PLAUR;FAU;OAZ1;XPR1
superficial stratum of r2BM	9/301	0.463982	0.999962	0	0	1.07512	0.825594	CSTB;GRN;FCER1G;RPS7;YWHAQ;SPP1;RPL37;L1CAM;AP2M1
superficial stratum of r7Lim	9/301	0.463982	0.999962	0	0	1.07512	0.825594	ACLY;DLX1;SYT4;MSN;TAGLN2;HLA-A;LSS;EIF4B;S100A10
thalamic (p2) zona limitans domain	9/301	0.463982	0.999962	0	0	1.07512	0.825594	RAB3C;RIMS3;GPX1;RGS16;NR2F1;MYO5A;RPL27;L1CAM;LSS
ventral pallium	9/301	0.463982	0.999962	0	0	1.07512	0.825594	IL1RN;CDKN1A;IL1B;FABP7;DCX;PLIN2;TREM2;INHBA;SOX4
ventral part of PHyB	9/301	0.463982	0.999962	0	0	1.07512	0.825594	SOX2;MARCKSL1;PEG10;SDC2;FXYD6;NCAM1;TIMP1;VIM;GNAI2
ventral premammillary nucleus (migrated)	9/301	0.463982	0.999962	0	0	1.07512	0.825594	DLX1;PCSK1N;FCER1G;TRIM28;SDC2;RPL12;GNAS;MSN;SOX11
ventral reuniens nucleus	9/301	0.463982	0.999962	0	0	1.07512	0.825594	SOX2;RAB3C;RIMS3;YWHAQ;DPYSL5;RGS16;CRMP1;L1CAM;AGRN
ventromedial preoptic nucleus	9/301	0.463982	0.999962	0	0	1.07512	0.825594	DLX1;TRIM28;RGS1;PEG10;RGS16;NNAT;UBA1;TIMP1;CXCL13
vertical nucleus of the diagonal band	9/301	0.463982	0.999962	0	0	1.07512	0.825594	VAT1;ALCAM;PEG10;USP11;PNOC;DNER;TXNIP;AP2M1;GNAI2
white matter of cerebellar vermis	9/301	0.463982	0.999962	0	0	1.07512	0.825594	CADM3;BTG1;PTPRZ1;UBN2;ZIC1;TNC;S100A4;VIM;A2M
intermediate stratum of DG	17/597	0.500722	0.999962	0	0	1.02191	0.706858	GPX1;RPS7;RPL31;CCL20;RPL22;CRABP1;RPLP0;ISLR2;LSS;RPS15;HNRNPM;RGS2;RAB31;GNG2;FAU;PFN1;XPR1
Field CA2, stratum lacunosum-moleculare	12/421	0.511188	0.999962	0	0	1.02276	0.686287	GNAO1;MMP14;FCER1G;FOXG1;ITGB2;LAPTM5;PLXNA1;ISLR2;CRMP1;TREM2;PFN1;VAMP2
Claustrum	11/386	0.514528	0.999962	0	0	1.02248	0.679445	GNAO1;ACAP3;ACTR2;TYROBP;GNG2;RPL21;ISLR2;CDH13;HMGCR;SREBF2;IER3
Laterodorsal tegmental nucleus	11/398	0.555637	0.999962	0	0	0.990155	0.581854	TMEFF1;FADS2;ACLY;CD63;GPX1;RPL35;SNCG;PLIN2;SAT1;FDFT1;RPS12
Taenia tecta	12/448	0.598302	0.999962	0	0	0.95806	0.492117	TOP2A;TMEFF1;FCER1G;GDF15;CRABP1;COL6A1;DCX;FLNA;CDH13;S100A4;SOX4;NEUROG2
A4 noradrenergic cell group	8/301	0.605069	0.999962	0	0	0.950617	0.477603	CD63;CD164;TTR;CD82;IGFBP2;ITGB2;DBI;WLS
AOB, internal plexiform layer	8/301	0.605069	0.999962	0	0	0.950617	0.477603	IL1RN;RAB31;IL1B;DCX;TREM2;INHBA;SOX4;SMARCA4
Agranular insular area	8/301	0.605069	0.999962	0	0	0.950617	0.477603	ACTR2;TYROBP;GNG2;YWHAB;ACTN4;HMGCR;TRIB2;PRPH
Agranular insular area, ventral part, layer 5	8/301	0.605069	0.999962	0	0	0.950617	0.477603	GNAO1;ACTR2;TYROBP;GNG2;ISLR2;HMGCR;XPR1;PRPH
Anterior cingulate area, ventral part, 6a	8/301	0.605069	0.999962	0	0	0.950617	0.477603	SQLE;GNB1;GRIK3;PLAUR;MYO5A;LSS;SREBF2;SEPT3
Bed nuclei of the stria terminalis, anterior division, anterolateral area	8/301	0.605069	0.999962	0	0	0.950617	0.477603	RGS2;SERPINE2;PEG10;CRABP1;COL6A1;NNAT;S100A6;GNAI2
Bed nuclei of the stria terminalis, anterior division, juxtacapsular nucleus	8/301	0.605069	0.999962	0	0	0.950617	0.477603	RGS2;SERPINE2;TTYH1;PEG10;CRABP1;ARHGDIB;COL6A1;ZMPSTE24
Cerebral cortex	8/301	0.605069	0.999962	0	0	0.950617	0.477603	IL1RN;MEF2C;ENC1;DCX;CELF5;INHBA;HMGCR;DUSP6
Dentate gyrus, granule cell layer	8/301	0.605069	0.999962	0	0	0.950617	0.477603	HNRNPM;RPS7;PKIA;RPL22;RPLP0;ISLR2;FAU;XPR1
Dentate gyrus, polymorph layer	8/301	0.605069	0.999962	0	0	0.950617	0.477603	HNRNPM;GNG2;RPS7;TRIM2;RPL22;RPLP0;FAU;XPR1
Dorsal peduncular area	8/301	0.605069	0.999962	0	0	0.950617	0.477603	FCER1G;GDF15;CRABP1;SOX11;S100A4;HLA-A;HSPG2;NEUROG2
Folium-tuber vermis (VII)	8/301	0.605069	0.999962	0	0	0.950617	0.477603	CADM3;BTG1;PTPRZ1;UBN2;ZIC1;TNC;VIM;A2M
Folium-tuber vermis (VII), granular layer	8/301	0.605069	0.999962	0	0	0.950617	0.477603	CADM3;BTG1;PTPRZ1;UBN2;ZIC1;TNC;VIM;A2M
Folium-tuber vermis (VII), molecular layer	8/301	0.605069	0.999962	0	0	0.950617	0.477603	CADM3;BTG1;PTPRZ1;UBN2;ZIC1;TNC;VIM;A2M
Interbrain	8/301	0.605069	0.999962	0	0	0.950617	0.477603	RAB3C;RIMS3;GPX1;RGS16;CRABP1;ZIC1;L1CAM;RPS21
Interpeduncular nucleus	8/301	0.605069	0.999962	0	0	0.950617	0.477603	IL1RN;GRN;FCER1G;SDC2;IGFBP3;S100A6;TIMP1;VIM
Koelliker-Fuse nucleus	8/301	0.605069	0.999962	0	0	0.950617	0.477603	VAT1;ZMIZ1;CFL1;LAPTM5;RPS20;NCAM1;SAT1;ATP9A
Lateral visual area	8/301	0.605069	0.999962	0	0	0.950617	0.477603	CDKN1A;PLAUR;PLIN2;HNRNPC;HMGCR;SYT13;RPS27A;NR3C1
Lobules IV-V, granular layer	8/301	0.605069	0.999962	0	0	0.950617	0.477603	CADM3;BTG1;PTPRZ1;ZIC1;TNC;ATN1;VIM;A2M
Main olfactory bulb, granule layer	8/301	0.605069	0.999962	0	0	0.950617	0.477603	IL1RN;CDKN1A;BTG1;FABP7;DCX;INHBA;SOX4;VAMP2
Main olfactory bulb, inner plexiform layer	8/301	0.605069	0.999962	0	0	0.950617	0.477603	IL1RN;CDKN1A;IL1B;FABP7;DCX;INHBA;SOX4;VAMP2
Main olfactory bulb, mitral layer	8/301	0.605069	0.999962	0	0	0.950617	0.477603	IL1RN;CDKN1A;IL1B;FABP7;DCX;INHBA;SOX4;VAMP2
Medial amygdalar nucleus, posterodorsal part, sublayer a	8/301	0.605069	0.999962	0	0	0.950617	0.477603	MARCKSL1;RPL21;DNER;APLP1;NR2F1;CDH13;HDGF;DBN1
Medial amygdalar nucleus, posterodorsal part, sublayer b	8/301	0.605069	0.999962	0	0	0.950617	0.477603	FADS2;TTR;CHL1;PNOC;DNER;NR2F1;XPR1;PRRC2A
Midbrain raphe nuclei	8/301	0.605069	0.999962	0	0	0.950617	0.477603	ACLY;IL1RN;SDC2;IGFBP3;PNOC;TIMP1;VIM;S100A10
Nodulus (X)	8/301	0.605069	0.999962	0	0	0.950617	0.477603	CD63;TTR;IGFBP3;ITGB2;TXNIP;TREM2;VIM;A2M
OB granular layer	8/301	0.605069	0.999962	0	0	0.950617	0.477603	IL1RN;CDKN1A;BTG1;IL1B;FABP7;DCX;INHBA;SOX4
OB olfactory fiber layer	8/301	0.605069	0.999962	0	0	0.950617	0.477603	IFITM3;FCER1G;IL1B;FABP7;PLIN2;TREM2;INHBA;CNN3
Orbital area, lateral part, layer 5	8/301	0.605069	0.999962	0	0	0.950617	0.477603	ACAP3;IL1RN;LASP1;LRP1;RPS18;MYO5A;SREBF2;IER3
Orbital area, ventrolateral part	8/301	0.605069	0.999962	0	0	0.950617	0.477603	IL1RN;CDKN1A;IL1B;CRABP1;LAPTM5;S100A6;SOX4;NEUROG2
Orbital area, ventrolateral part, layer 2/3	8/301	0.605069	0.999962	0	0	0.950617	0.477603	IL1RN;CDKN1A;IL1B;CRABP1;LAPTM5;S100A6;SOX4;NEUROG2
Orbital area, ventrolateral part, layer 5	8/301	0.605069	0.999962	0	0	0.950617	0.477603	IL1RN;CDKN1A;TYROBP;LRP1;RPS18;S100A6;PTN;SREBF2
Orbital area, ventrolateral part, layer 6a	8/301	0.605069	0.999962	0	0	0.950617	0.477603	TOP2A;NGRN;CDKN1A;TYROBP;S100A6;GPC2;SREBF2;VAMP2
Posterior amygdalar nucleus	8/301	0.605069	0.999962	0	0	0.950617	0.477603	MARCKSL1;PEA15;DNER;APLP1;PSAP;NR2F1;HDGF;AP2M1
Posterior parietal association areas, layer 6a	8/301	0.605069	0.999962	0	0	0.950617	0.477603	CAP1;CDKN1A;PTPRS;MYO5A;TNRC18;HMGCR;PHLDA1;DUSP6
Posterolateral visual area, layer 6b	8/301	0.605069	0.999962	0	0	0.950617	0.477603	CAP1;GNG2;FASN;COL6A1;NR2F1;CTNNB1;NR3C1;PRPH
Primary somatosensory area, trunk, layer 6b	8/301	0.605069	0.999962	0	0	0.950617	0.477603	ACAP3;LASP1;LRP1;FASN;COL6A1;PPT1;SYT13;NR3C1
Primary somatosensory area, upper limb, layer 6b	8/301	0.605069	0.999962	0	0	0.950617	0.477603	TMEFF1;ACAP3;LRP1;KIF5C;FASN;MYO5A;SYT13;NR3C1
Purkinje cell layer of CbVCx	8/301	0.605069	0.999962	0	0	0.950617	0.477603	CADM3;BTG1;PTPRZ1;UBN2;ZIC1;TNC;VIM;A2M
Retrosplenial area, dorsal part, layer 6a	8/301	0.605069	0.999962	0	0	0.950617	0.477603	CDKN1A;PTPRS;MYO5A;TNRC18;S100A4;HMGCR;RPS27A;RAB6B
Subiculum, dorsal part, pyramidal layer	8/301	0.605069	0.999962	0	0	0.950617	0.477603	TMEFF1;HNRNPK;LRP1;FOXG1;CD14;PFN1;NR3C1;DUSP6
Superior central nucleus raphe	8/301	0.605069	0.999962	0	0	0.950617	0.477603	CSTB;ACLY;YWHAQ;SPP1;AMPD3;L1CAM;AP2M1;S100A10
Supramammillary nucleus, medial part	8/301	0.605069	0.999962	0	0	0.950617	0.477603	SYT4;IL1RN;DPYSL5;RGS1;DNER;S100A6;S100A4;TIMP1
Thalamus, polymodal association cortex related	8/301	0.605069	0.999962	0	0	0.950617	0.477603	RAB3C;RIMS3;GPX1;RGS16;ZIC1;TNC;CTNNB1;L1CAM
Tuberomammillary nucleus	8/301	0.605069	0.999962	0	0	0.950617	0.477603	DLX1;TRIM28;RPL12;S100A6;NCAM1;TIMP1;VIM;CXCL13
Uvula (IX), molecular layer	8/301	0.605069	0.999962	0	0	0.950617	0.477603	BTG1;PTPRZ1;IGFBP3;ZIC1;TNC;PLIN2;VIM;A2M
Ventral group of the dorsal thalamus	8/301	0.605069	0.999962	0	0	0.950617	0.477603	RIMS3;GPX1;IL1B;RGS16;NR2F1;MYO5A;L1CAM;SAT1
Zona incerta	8/301	0.605069	0.999962	0	0	0.950617	0.477603	RAB31;YWHAQ;RPS8;PNOC;RPL35A;RPL27;TMBIM6;RPS21
anterior olfactory area, ventral part	8/301	0.605069	0.999962	0	0	0.950617	0.477603	IL1RN;COL6A1;DCX;PTN;INHBA;YBX1;SOX4;VAMP2
basal peduncular hypothalamus	8/301	0.605069	0.999962	0	0	0.950617	0.477603	GRN;MARCKSL1;PEG10;SDC2;TMBIM6;TIMP1;CXCL13;GNAI2
central lateral nucleus	8/301	0.605069	0.999962	0	0	0.950617	0.477603	RIMS3;RGS16;ZIC1;TNC;CTNNB1;L1CAM;NR3C1;IER3
cerebellar vermis	8/301	0.605069	0.999962	0	0	0.950617	0.477603	CADM3;BTG1;PTPRZ1;UBN2;ZIC1;TNC;VIM;A2M
cortex of cerebellar vermis	8/301	0.605069	0.999962	0	0	0.950617	0.477603	CADM3;BTG1;PTPRZ1;UBN2;ZIC1;TNC;VIM;A2M
diencephalon	8/301	0.605069	0.999962	0	0	0.950617	0.477603	RAB3C;RIMS3;GPX1;RGS16;ZIC1;TNC;L1CAM;LSS
dorsal entopeduncular nucleus	8/301	0.605069	0.999962	0	0	0.950617	0.477603	RPS15;VAT1;NGRN;RAB31;GPX1;PEG10;TMBIM6;RPS21
dorsal juxtacommissural pretectal nucleus	8/301	0.605069	0.999962	0	0	0.950617	0.477603	IFITM3;FADS2;CD82;SDC2;UBN2;TXNIP;DBI;PRDX6
dorsal part of JcP	8/301	0.605069	0.999962	0	0	0.950617	0.477603	IFITM3;FADS2;CD82;SDC2;FABP7;TXNIP;DBI;PRDX6
dorsal part of PcP	8/301	0.605069	0.999962	0	0	0.950617	0.477603	HNRNPM;RPL18A;RPS18;HNRNPH1;TRIM2;RPS6;FAU;XPR1
dorsofrontal pretectal nucleus	8/301	0.605069	0.999962	0	0	0.950617	0.477603	YWHAQ;FABP7;RGS16;TNC;CTNNB1;L1CAM;NR3C1;YWHAG
hippocampus (cortex Ammonis)	8/301	0.605069	0.999962	0	0	0.950617	0.477603	GNAO1;FOXG1;LAPTM5;ISLR2;PLXNA1;CRMP1;PFN1;VAMP2
intercalated amygdaloid nuclei	8/301	0.605069	0.999962	0	0	0.950617	0.477603	TMEFF1;GNG2;RPL21;CHL1;NR2F1;AP2M1;WLS;PRPH
intermediate part of StrSe	8/301	0.605069	0.999962	0	0	0.950617	0.477603	SOX2;SYT4;RGS2;ALCAM;ZIC1;COL6A1;XPR1;ITM2C
intermediate stratum of JcPD	8/301	0.605069	0.999962	0	0	0.950617	0.477603	IFITM3;FADS2;CD82;SDC2;FABP7;TXNIP;DBI;PRDX6
intermediate stratum of OB	8/301	0.605069	0.999962	0	0	0.950617	0.477603	IL1RN;CDKN1A;IL1B;FABP7;DCX;TREM2;INHBA;SOX4
intermediate stratum of PcPD	8/301	0.605069	0.999962	0	0	0.950617	0.477603	YWHAQ;FABP7;RGS16;TNC;CTNNB1;L1CAM;NR3C1;YWHAG
intermediate stratum of the PBC	8/301	0.605069	0.999962	0	0	0.950617	0.477603	RPS18;PRDX1;PLXNA1;MSN;RPS20;NCAM1;SERF2;GNAI2
interstitial nucleus of the posterior limb of the anterior commissure	8/301	0.605069	0.999962	0	0	0.950617	0.477603	RGS2;RPL21;CHL1;PEG10;IL1B;COL6A1;ACTG1;PRPH
isthmic alar plate	8/301	0.605069	0.999962	0	0	0.950617	0.477603	CADM3;BTG1;PTPRZ1;UBN2;ZIC1;TNC;VIM;A2M
isthmus	8/301	0.605069	0.999962	0	0	0.950617	0.477603	CADM3;BTG1;PTPRZ1;UBN2;ZIC1;TNC;VIM;A2M
lateral SC part of the periaqueductal gray	8/301	0.605069	0.999962	0	0	0.950617	0.477603	CSTB;SERPINE2;RPS8;TTC3;HMGA1;SNCG;EBF3;AP2M1
lateral anterior hypothalamic nucleus	8/301	0.605069	0.999962	0	0	0.950617	0.477603	RPS15;PEG10;RGS16;CANX;CIRBP;STMN3;FXYD6;RPS21
lateral parabrachial nucleus	8/301	0.605069	0.999962	0	0	0.950617	0.477603	VAT1;SYT4;SPARC;PRDX1;TNC;RPS20;NCAM1;SAT1
lateral part of alar p2	8/301	0.605069	0.999962	0	0	0.950617	0.477603	RAB3C;RIMS3;RGS16;ZIC1;TNC;CTNNB1;L1CAM;CLASP2
lateral wings of the dorsal raphe nucleus	8/301	0.605069	0.999962	0	0	0.950617	0.477603	RGS2;RPL12;PNOC;EBF3;NCAM1;AMPD3;YWHAZ;S100A10
layer 2 of OCx	8/301	0.605069	0.999962	0	0	0.950617	0.477603	MEF2C;CDKN1A;ENC1;TNRC18;NR3C1;DCLK1;DUSP6;SMARCA4
layer 3 of VPrP cortex	8/301	0.605069	0.999962	0	0	0.950617	0.477603	ACTR2;MARCKSL1;TYROBP;DNER;PTN;HMGCR;VAMP2;AP2M1
layer 5 of InsCx	8/301	0.605069	0.999962	0	0	0.950617	0.477603	TMEFF1;ACTR2;LASP1;TYROBP;GNG2;PPT1;ACTN4;IER3
layer 6 of InsCx	8/301	0.605069	0.999962	0	0	0.950617	0.477603	ACTR2;LASP1;TYROBP;GNG2;PPT1;PLAUR;ACTN4;IER3
magnocellular diagonal band nucleus	8/301	0.605069	0.999962	0	0	0.950617	0.477603	SOX2;ACAP3;MARCKSL1;RPL21;STMN3;TKT;CXCL13;AP2M1
magnocellular interstitial nucleus of the posterior commissure	8/301	0.605069	0.999962	0	0	0.950617	0.477603	CSTB;DPYSL2;PNOC;TNC;ATP5G3;AGRN;PRDX6;PFDN5
mantle zone of AOV	8/301	0.605069	0.999962	0	0	0.950617	0.477603	IL1RN;COL6A1;DCX;PTN;INHBA;YBX1;SOX4;VAMP2
mantle zone of AStr	8/301	0.605069	0.999962	0	0	0.950617	0.477603	RGS2;TTR;RPL21;CHL1;ITGB2;COL6A1;XPR1;PRPH
mantle zone of CA	8/301	0.605069	0.999962	0	0	0.950617	0.477603	GNAO1;FOXG1;LAPTM5;ISLR2;PLXNA1;CRMP1;PFN1;VAMP2
mantle zone of JcPD	8/301	0.605069	0.999962	0	0	0.950617	0.477603	IFITM3;FADS2;CD82;SDC2;FABP7;TXNIP;DBI;PRDX6
mantle zone of OB	8/301	0.605069	0.999962	0	0	0.950617	0.477603	IL1RN;CDKN1A;IL1B;FABP7;DCX;TREM2;INHBA;SOX4
mantle zone of OCx	8/301	0.605069	0.999962	0	0	0.950617	0.477603	MEF2C;CDKN1A;TNRC18;HMGCR;NR3C1;DUSP6;GLTSCR2;SMARCA4
mantle zone of PcPD	8/301	0.605069	0.999962	0	0	0.950617	0.477603	HNRNPM;RPL18A;RPS18;HNRNPH1;TRIM2;RPS6;FAU;XPR1
mantle zone of THyB-P	8/301	0.605069	0.999962	0	0	0.950617	0.477603	PCSK1N;FCER1G;DPYSL5;RPL12;S100A6;GNAS;SOX11;RPL37
mantle zone of cerebellar vermis	8/301	0.605069	0.999962	0	0	0.950617	0.477603	CADM3;BTG1;PTPRZ1;UBN2;ZIC1;TNC;VIM;A2M
medial parabrachial nucleus	8/301	0.605069	0.999962	0	0	0.950617	0.477603	RPS18;PRDX1;PLXNA1;MSN;RPS20;NCAM1;SERF2;GNAI2
molecular layer of CbVCx	8/301	0.605069	0.999962	0	0	0.950617	0.477603	CADM3;BTG1;PTPRZ1;UBN2;ZIC1;TNC;VIM;A2M
nucleus of Barrington	8/301	0.605069	0.999962	0	0	0.950617	0.477603	TMEFF1;ACLY;RPL12;EBF3;PLIN2;NCAM1;SAT1;S100A10
occipital cortex	8/301	0.605069	0.999962	0	0	0.950617	0.477603	MEF2C;CDKN1A;TNRC18;HMGCR;NR3C1;DUSP6;GLTSCR2;SMARCA4
oculomotor nucleus, Edinger-Westphal subnucleus	8/301	0.605069	0.999962	0	0	0.950617	0.477603	VAT1;ACLY;LGALS1;PNOC;SNCG;AMPD3;MAPT;FAU
olfactory bulb, principal part	8/301	0.605069	0.999962	0	0	0.950617	0.477603	IL1RN;CDKN1A;IL1B;FABP7;DCX;TREM2;INHBA;SOX4
oval paracentral nucleus	8/301	0.605069	0.999962	0	0	0.950617	0.477603	RIMS3;YWHAQ;IL1B;RGS16;ITGB2;L1CAM;LSS;IER3
parabrachial part of the periaqueductal gray	8/301	0.605069	0.999962	0	0	0.950617	0.477603	FADS2;SERPINE2;RPS18;PKIA;NNAT;SNCG;EBF3;GNAI2
parvocellular part of r8LRt	8/301	0.605069	0.999962	0	0	0.950617	0.477603	TOP2A;TRIM28;TSC22D1;NRG4;PKIA;IGFBP3;TIMP1;MMP9
perimammillary part of THyB	8/301	0.605069	0.999962	0	0	0.950617	0.477603	PCSK1N;FCER1G;DPYSL5;RPL12;S100A6;GNAS;SOX11;RPL37
periventricular stratum of r4Ve	8/301	0.605069	0.999962	0	0	0.950617	0.477603	CD63;TTR;CD82;IGFBP2;ITGB2;DBI;INHBA;WLS
periventricular stratum of the PBC	8/301	0.605069	0.999962	0	0	0.950617	0.477603	FADS2;SERPINE2;RPS18;PKIA;NNAT;SNCG;EBF3;GNAI2
posteromedial visual area, layer 1	8/301	0.605069	0.999962	0	0	0.950617	0.477603	IFITM3;NGRN;TRIM28;TAGLN2;TNRC18;S100A4;DCLK1;DUSP6
posteromedial visual area, layer 6b	8/301	0.605069	0.999962	0	0	0.950617	0.477603	CDH2;CCL20;CNBP;MSN;HDGF;HMGCR;NR3C1;KLC1
r1 part of the 'mesencephalic' trigeminal nucleus	8/301	0.605069	0.999962	0	0	0.950617	0.477603	ACLY;RPS18;PRDX1;PLXNA1;RPS20;NCAM1;EIF4B;S100A10
r2 part of prepontine raphe nucleus	8/301	0.605069	0.999962	0	0	0.950617	0.477603	CSTB;YWHAQ;SPP1;RPL26;AMPD3;AGRN;YWHAZ;AP2M1
r3 part of medial pontine nuclei	8/301	0.605069	0.999962	0	0	0.950617	0.477603	GRN;SLC25A3;SLC20A1;SPP1;HMGA1;STMN3;NEFL;PHLDA1
r4 part of parvocellular medial vestibular nucleus	8/301	0.605069	0.999962	0	0	0.950617	0.477603	CD63;TTR;CD82;IGFBP2;ITGB2;DBI;INHBA;WLS
r7 part of nucleus prepositus	8/301	0.605069	0.999962	0	0	0.950617	0.477603	CSTB;SYT4;TTR;IGFBP3;SNCG;LAMB1;FAU;A2M
r9 part of basomedial reticular formation	8/301	0.605069	0.999962	0	0	0.950617	0.477603	TOP2A;DNAJA1;CSTB;LGALS1;GDF15;RPL12;MSN;SNCG
r9 part of external cuneate nucleus	8/301	0.605069	0.999962	0	0	0.950617	0.477603	VAT1;APC2;IGFBP3;HMGA1;TAGLN2;PLIN2;A2M;YWHAZ
rostral ventrolateral reticular area	8/301	0.605069	0.999962	0	0	0.950617	0.477603	TRIM28;NRG4;GPC2;HLA-A;LSS;EIF4B;ZMPSTE24;S100A10
striatal amygdala	8/301	0.605069	0.999962	0	0	0.950617	0.477603	RGS2;TTR;RPL21;CHL1;ITGB2;COL6A1;XPR1;PRPH
striatal septum	8/301	0.605069	0.999962	0	0	0.950617	0.477603	SOX2;SYT4;RGS2;ALCAM;PNOC;ZIC1;EBF3;XPR1
sublayer 6a of CCx	8/301	0.605069	0.999962	0	0	0.950617	0.477603	SQLE;TMEFF1;GRIK3;MYO5A;DUSP6;SREBF2;VAMP2;SEPT3
sublayer 6a of PCx	8/301	0.605069	0.999962	0	0	0.950617	0.477603	TMEFF1;LASP1;PTPRS;LRP1;PPT1;MYO5A;HMGCR;SYT13
submedius thalamic nucleus	8/301	0.605069	0.999962	0	0	0.950617	0.477603	SOX2;RAB3C;RIMS3;YWHAQ;DPYSL5;RGS16;L1CAM;AGRN
substantia nigra reticulata, isthmic part	8/301	0.605069	0.999962	0	0	0.950617	0.477603	IFITM3;NRG4;IGFBP3;LAPTM5;VIM;MMP9;LSS;SMARCA4
superficial stratum of AOV	8/301	0.605069	0.999962	0	0	0.950617	0.477603	IL1RN;COL6A1;DCX;PTN;INHBA;YBX1;SOX4;VAMP2
superficial stratum of CA	8/301	0.605069	0.999962	0	0	0.950617	0.477603	GNAO1;FOXG1;LAPTM5;ISLR2;PLXNA1;CRMP1;PFN1;VAMP2
superficial stratum of OCx (cortical plate/marginal zone)	8/301	0.605069	0.999962	0	0	0.950617	0.477603	MEF2C;CDKN1A;TNRC18;HMGCR;NR3C1;DUSP6;GLTSCR2;SMARCA4
superficial stratum of PPaA	8/301	0.605069	0.999962	0	0	0.950617	0.477603	RPS15;VAT1;NGRN;RAB31;GPX1;PEG10;TMBIM6;RPS21
superficial stratum of cerebellar vermis	8/301	0.605069	0.999962	0	0	0.950617	0.477603	CADM3;BTG1;PTPRZ1;UBN2;ZIC1;TNC;VIM;A2M
superficial stratum of isBI	8/301	0.605069	0.999962	0	0	0.950617	0.477603	IFITM3;NRG4;IGFBP3;LAPTM5;VIM;MMP9;LSS;SMARCA4
superficial stratum of p2ZL	8/301	0.605069	0.999962	0	0	0.950617	0.477603	RAB3C;RIMS3;YWHAQ;RGS16;PNOC;L1CAM;AGRN;LSS
superficial stratum of r1BM	8/301	0.605069	0.999962	0	0	0.950617	0.477603	IL1RN;GRN;FCER1G;YWHAQ;SDC2;IGFBP3;VIM;AP2M1
superficial stratum of r3BM	8/301	0.605069	0.999962	0	0	0.950617	0.477603	GRN;SLC25A3;SLC20A1;SPP1;HMGA1;STMN3;NEFL;PHLDA1
superficial stratum of r7BL	8/301	0.605069	0.999962	0	0	0.950617	0.477603	TRIM28;NRG4;GPC2;HLA-A;LSS;EIF4B;ZMPSTE24;S100A10
superficial stratum of r9Ve	8/301	0.605069	0.999962	0	0	0.950617	0.477603	VAT1;APC2;IGFBP3;HMGA1;TAGLN2;PLIN2;A2M;YWHAZ
superficial stratum of the PBC	8/301	0.605069	0.999962	0	0	0.950617	0.477603	VAT1;SYT4;SPARC;PRDX1;TNC;RPS20;NCAM1;SAT1
ventromedial nucleus	8/301	0.605069	0.999962	0	0	0.950617	0.477603	RAB3C;RIMS3;YWHAQ;RGS16;RPL27;L1CAM;AGRN;SAT1
Field CA3, stratum radiatum	9/342	0.617601	0.999962	0	0	0.940728	0.453349	GNAO1;RPS7;CHL1;FOXG1;RPL22;LAPTM5;ISLR2;PFN1;VAMP2
Field CA3, stratum lacunosum-moleculare	11/432	0.663632	0.999962	0	0	0.908566	0.372537	GNAO1;MMP14;IGFBP3;FOXG1;IGFBP2;LAPTM5;PLXNA1;ISLR2;SH3BGRL3;PFN1;VAMP2
Anteromedial nucleus	9/357	0.667844	0.999962	0	0	0.899472	0.363117	RAB3C;RIMS3;GPX1;RGS16;ZIC1;CTNNB1;L1CAM;NDRG1;AP2M1
Dorsal tegmental nucleus	10/396	0.670042	0.999962	0	0	0.900874	0.360723	SOX2;FADS2;CD164;CD82;RPS6;IGFBP2;RPL37A;HNRNPA2B1;FDFT1;CNN3
AOB, glomerular layer	7/301	0.738489	0.999962	0	0	0.827413	0.250829	IL1RN;RAB31;IL1B;DCX;INHBA;SOX4;SMARCA4
Agranular insular area, dorsal part, layer 2/3	7/301	0.738489	0.999962	0	0	0.827413	0.250829	ACTR2;SH3BGRL3;HDGF;ACTN4;PTN;TKT;TRIB2
Agranular insular area, dorsal part, layer 5	7/301	0.738489	0.999962	0	0	0.827413	0.250829	TMEFF1;ACAP3;ACTR2;LASP1;TYROBP;GNG2;HMGCR
Agranular insular area, ventral part, layer 2/3	7/301	0.738489	0.999962	0	0	0.827413	0.250829	ACTR2;GRN;TYROBP;GNG2;PLAUR;TRIB2;PRPH
Anterior amygdalar area	7/301	0.738489	0.999962	0	0	0.827413	0.250829	MARCKSL1;RPS19;IL1B;NR2F1;CXCL13;TRIB2;AP2M1
Anterior cingulate area, dorsal part, layer 6a	7/301	0.738489	0.999962	0	0	0.827413	0.250829	TMEFF1;SCRN1;GRIK3;MYO5A;SH3BGRL3;SREBF2;SEPT3
Anterior cingulate area, ventral part, 6b	7/301	0.738489	0.999962	0	0	0.827413	0.250829	YWHAE;SCRN1;GRIK3;PLAUR;MYO5A;SREBF2;SEPT3
Anteromedial nucleus, dorsal part	7/301	0.738489	0.999962	0	0	0.827413	0.250829	RAB3C;RIMS3;GPX1;RGS16;ZIC1;L1CAM;AP2M1
Anteromedial nucleus, ventral part	7/301	0.738489	0.999962	0	0	0.827413	0.250829	RAB3C;RIMS3;GPX1;RGS16;ZIC1;L1CAM;AP2M1
Anteromedial visual area, layer 1	7/301	0.738489	0.999962	0	0	0.827413	0.250829	CDKN1A;TRIM28;ENC1;TAGLN2;INHBA;DUSP6;SMARCA4
Basic cell groups and regions	7/301	0.738489	0.999962	0	0	0.827413	0.250829	MEF2C;FABP7;ENC1;ZIC1;CELF5;A2M;DUSP6
Bed nuclei of the stria terminalis, posterior division, strial extension	7/301	0.738489	0.999962	0	0	0.827413	0.250829	CD63;RGS2;TTR;CRABP1;COL6A1;VIM;SOX4
Central lateral nucleus of the thalamus	7/301	0.738489	0.999962	0	0	0.827413	0.250829	RIMS3;RGS16;TNC;CTNNB1;L1CAM;NR3C1;IER3
Cochlear nucleus, subpedunclular granular region	7/301	0.738489	0.999962	0	0	0.827413	0.250829	CD164;BTG1;IGFBP2;ZIC1;NEUROG2;WLS;ZFP36L1
Cortical amygdalar area, posterior part, medial zone	7/301	0.738489	0.999962	0	0	0.827413	0.250829	MARCKSL1;TSC22D1;PKIA;PEA15;NR2F1;CDH13;AP2M1
Cortical plate	7/301	0.738489	0.999962	0	0	0.827413	0.250829	IL1RN;MEF2C;ENC1;DCX;CELF5;INHBA;DUSP6
Culmen	7/301	0.738489	0.999962	0	0	0.827413	0.250829	CADM3;BTG1;PTPRZ1;ZIC1;TNC;VIM;A2M
Fastigial nucleus	7/301	0.738489	0.999962	0	0	0.827413	0.250829	CD63;BTG1;ITGB2;SOX11;S100A4;HSPG2;NEUROG2
Field CA3, pyramidal layer	7/301	0.738489	0.999962	0	0	0.827413	0.250829	GNAO1;RPS7;FOXG1;RPL22;ISLR2;PFN1;VAMP2
Field CA3, stratum lucidum	7/301	0.738489	0.999962	0	0	0.827413	0.250829	GNAO1;RPS7;FOXG1;ISLR2;PLXNA1;PFN1;VAMP2
Flocculus, granular layer	7/301	0.738489	0.999962	0	0	0.827413	0.250829	BTG1;UBN2;ITGB2;ZIC1;STMN2;ATN1;ZFP36L1
Flocculus, molecular layer	7/301	0.738489	0.999962	0	0	0.827413	0.250829	BTG1;ITGB2;ZIC1;ATN1;LCP1;A2M;ZFP36L1
Hypothalamic medial zone	7/301	0.738489	0.999962	0	0	0.827413	0.250829	DLX1;PCSK1N;DPYSL5;PEG10;SDC2;CRABP1;SOX11
Infralimbic area	7/301	0.738489	0.999962	0	0	0.827413	0.250829	FCER1G;CRABP1;S100A6;S100A4;HLA-A;HSPG2;NEUROG2
Infralimbic area, layer 1	7/301	0.738489	0.999962	0	0	0.827413	0.250829	FCER1G;CRABP1;DCX;S100A4;HLA-A;HSPG2;NEUROG2
JcP contribution to LTL	7/301	0.738489	0.999962	0	0	0.827413	0.250829	RPL18A;GDF15;PKIA;RGS16;PEA15;RPL37;FGFBP3
Lateral habenula	7/301	0.738489	0.999962	0	0	0.827413	0.250829	CD63;SCRN1;FABP7;RGS16;ZIC1;TNC;XPR1
Lateral visual area, layer 6a	7/301	0.738489	0.999962	0	0	0.827413	0.250829	CDKN1A;PLAUR;CTNNB1;HNRNPC;HMGCR;SYT13;NR3C1
Lateral visual area, layer 6b	7/301	0.738489	0.999962	0	0	0.827413	0.250829	CAP1;CDKN1A;GNG2;PLAUR;CTNNB1;HNRNPC;NR3C1
Lobule III	7/301	0.738489	0.999962	0	0	0.827413	0.250829	BTG1;PTPRZ1;ZIC1;TNC;VIM;A2M;SEPT2
Lobule III, granular layer	7/301	0.738489	0.999962	0	0	0.827413	0.250829	BTG1;PTPRZ1;ZIC1;TNC;VIM;A2M;SEPT2
Lobules IV-V	7/301	0.738489	0.999962	0	0	0.827413	0.250829	CADM3;BTG1;PTPRZ1;ZIC1;TNC;VIM;A2M
Lobules IV-V, molecular layer	7/301	0.738489	0.999962	0	0	0.827413	0.250829	CADM3;BTG1;PTPRZ1;ZIC1;TNC;VIM;A2M
Medial amygdalar nucleus	7/301	0.738489	0.999962	0	0	0.827413	0.250829	MARCKSL1;RPL21;CHL1;NR2F1;HDGF;PRDX6;AP2M1
Medial group of the dorsal thalamus	7/301	0.738489	0.999962	0	0	0.827413	0.250829	RAB3C;RIMS3;DPYSL5;RGS16;ZIC1;CTNNB1;L1CAM
Mediodorsal nucleus of the thalamus, medial part	7/301	0.738489	0.999962	0	0	0.827413	0.250829	RAB3C;RIMS3;DPYSL5;RGS16;ZIC1;CTNNB1;L1CAM
Midbrain, behavioral state related	7/301	0.738489	0.999962	0	0	0.827413	0.250829	VAT1;ACLY;IL1RN;SDC2;SNCG;TIMP1;VIM
Nodulus (X), molecular layer	7/301	0.738489	0.999962	0	0	0.827413	0.250829	TTR;IGFBP3;ITGB2;TXNIP;TREM2;VIM;A2M
Nucleus accumbens	7/301	0.738489	0.999962	0	0	0.827413	0.250829	CAP1;RGS2;ALCAM;SERPINE2;COL6A1;DCX;ATP2B1
Nucleus of the solitary tract	7/301	0.738489	0.999962	0	0	0.827413	0.250829	VAT1;APC2;FASN;SOX11;TAGLN2;PLIN2;A2M
Nucleus prepositus	7/301	0.738489	0.999962	0	0	0.827413	0.250829	SYT4;TTR;IGFBP3;ITGB2;LAMB1;RPL37;A2M
OB inner plexiform layer	7/301	0.738489	0.999962	0	0	0.827413	0.250829	IL1RN;CDKN1A;IL1B;FABP7;DCX;INHBA;SOX4
OB mitral cell layer	7/301	0.738489	0.999962	0	0	0.827413	0.250829	IL1RN;CDKN1A;FABP7;DCX;INHBA;SOX4;VAMP2
Orbital area, medial part, layer 5	7/301	0.738489	0.999962	0	0	0.827413	0.250829	IL1RN;CDKN1A;CRABP1;S100A6;SH3BGRL3;HN1;ATP9A
Parabrachial nucleus	7/301	0.738489	0.999962	0	0	0.827413	0.250829	SPARC;RPS18;PEG10;PRDX1;RPS20;NCAM1;GNAI2
Parabrachial nucleus, lateral division	7/301	0.738489	0.999962	0	0	0.827413	0.250829	SPARC;RPS18;PRDX1;PLXNA1;RPS20;NCAM1;GNAI2
Parabrachial nucleus, lateral division, central lateral part	7/301	0.738489	0.999962	0	0	0.827413	0.250829	RPS18;PLXNA1;MSN;RPS20;NCAM1;SERF2;GNAI2
Perihypoglossal nuclei	7/301	0.738489	0.999962	0	0	0.827413	0.250829	SYT4;TTR;IGFBP3;ITGB2;LAMB1;RPL37;A2M
Posterior parietal association areas, layer 4	7/301	0.738489	0.999962	0	0	0.827413	0.250829	CDKN1A;WDR82;TNRC18;PTN;HMGCR;HSPG2;DUSP6
Posterior parietal association areas, layer 5	7/301	0.738489	0.999962	0	0	0.827413	0.250829	CDKN1A;LASP1;MYO5A;TNRC18;PTN;HMGCR;DUSP6
Posterolateral visual area, layer 5	7/301	0.738489	0.999962	0	0	0.827413	0.250829	CDKN1A;LASP1;PLAUR;PTN;HMGCR;NR3C1;DUSP6
Postsubiculum, layer 3	7/301	0.738489	0.999962	0	0	0.827413	0.250829	CAP1;CDKN1A;CHL1;NR2F1;HDGF;NR3C1;TRIB2
Prelimbic area	7/301	0.738489	0.999962	0	0	0.827413	0.250829	IL1RN;KIF5C;S100A6;SH3BGRL3;NEUROG2;ATP9A;SMARCA4
Prelimbic area, layer 2/3	7/301	0.738489	0.999962	0	0	0.827413	0.250829	SYT4;IL1RN;CRABP1;S100A6;NEUROG2;ATP9A;SMARCA4
Primary motor area, Layer 6b	7/301	0.738489	0.999962	0	0	0.827413	0.250829	TMEFF1;PTPRS;SCRN1;LRP1;MYO5A;SREBF2;SEPT3
Primary somatosensory area, lower limb, layer 6b	7/301	0.738489	0.999962	0	0	0.827413	0.250829	TMEFF1;SCRN1;LRP1;COL6A1;MYO5A;SYT13;NR3C1
Primary somatosensory area, mouth, layer 4	7/301	0.738489	0.999962	0	0	0.827413	0.250829	LASP1;TYROBP;CIRBP;PLAUR;TNRC18;PTN;B2M
Primary visual area	7/301	0.738489	0.999962	0	0	0.827413	0.250829	CDKN1A;CCL20;TNRC18;PTN;HMGCR;NR3C1;DUSP6
Primary visual area, layer 4	7/301	0.738489	0.999962	0	0	0.827413	0.250829	CDKN1A;LASP1;CCL20;TNRC18;PTN;HMGCR;DUSP6
Retrosplenial area, lateral agranular part	7/301	0.738489	0.999962	0	0	0.827413	0.250829	NGRN;CDKN1A;TNRC18;S100A4;HMGCR;DUSP6;SMARCA4
Striatum	7/301	0.738489	0.999962	0	0	0.827413	0.250829	CAP1;RGS2;ALCAM;SERPINE2;TTYH1;COL6A1;ATP2B1
Substantia nigra, compact part	7/301	0.738489	0.999962	0	0	0.827413	0.250829	VAT1;SLC38A1;YWHAQ;SDC2;SNCG;LSS;VAMP2
Superior central nucleus raphe, lateral part	7/301	0.738489	0.999962	0	0	0.827413	0.250829	CSTB;YWHAQ;SPP1;AMPD3;L1CAM;AP2M1;S100A10
Superior colliculus, sensory related	7/301	0.738489	0.999962	0	0	0.827413	0.250829	IFITM3;MMP14;GDF15;S100A6;RPL27;UBA1;SMARCA4
Uvula (IX)	7/301	0.738489	0.999962	0	0	0.827413	0.250829	BTG1;PTPRZ1;ZIC1;TNC;PLIN2;VIM;A2M
Uvula (IX), granular layer	7/301	0.738489	0.999962	0	0	0.827413	0.250829	BTG1;PTPRZ1;ZIC1;TNC;PLIN2;VIM;A2M
Ventral medial nucleus of the thalamus	7/301	0.738489	0.999962	0	0	0.827413	0.250829	RAB3C;RIMS3;YWHAQ;RGS16;RPL27;L1CAM;AGRN
Ventral posterior complex of the thalamus	7/301	0.738489	0.999962	0	0	0.827413	0.250829	GPX1;RGS16;NR2F1;MYO5A;L1CAM;SAT1;CLASP2
Vermal regions	7/301	0.738489	0.999962	0	0	0.827413	0.250829	CADM3;BTG1;PTPRZ1;ZIC1;TNC;VIM;A2M
Visceral area, layer 6b	7/301	0.738489	0.999962	0	0	0.827413	0.250829	GNAO1;GNG2;PLAUR;AP2M1;IER3;MTDH;FDFT1
accumbens nucleus, shell domain	7/301	0.738489	0.999962	0	0	0.827413	0.250829	GNAO1;RGS2;ALCAM;TSC22D1;COL6A1;YBX1;PHLDA1
amygdalo-striatal transition	7/301	0.738489	0.999962	0	0	0.827413	0.250829	RGS2;RPL21;ITGB2;COL6A1;TNC;LSS;XPR1
anterior pretectal nucleus, dorsal core part	7/301	0.738489	0.999962	0	0	0.827413	0.250829	NGRN;RIMS3;RGS16;LAPTM5;TNC;S100A4;NR3C1
basal plate of p3	7/301	0.738489	0.999962	0	0	0.827413	0.250829	RGS1;SDC2;PABPC4;IL1B;EBF3;TMBIM6;CXCL13
bed nucleus of stria terminalis, lateral amygdaloid division	7/301	0.738489	0.999962	0	0	0.827413	0.250829	CD63;FADS2;RGS2;TTR;ITGB2;DBI;LSS
caudal interpeduncular nucleus	7/301	0.738489	0.999962	0	0	0.827413	0.250829	IL1RN;GRN;FCER1G;YWHAQ;IGFBP3;SPP1;AP2M1
caudal zona incerta	7/301	0.738489	0.999962	0	0	0.827413	0.250829	YWHAQ;RPS8;SDC2;IL1B;RPL35A;TMBIM6;LSS
cerebellar nuclei of CbV	7/301	0.738489	0.999962	0	0	0.827413	0.250829	CD63;BTG1;ITGB2;SOX11;S100A4;HSPG2;NEUROG2
core part of DTg	7/301	0.738489	0.999962	0	0	0.827413	0.250829	SOX2;CD82;HNRNPA2B1;RPS6;IGFBP2;RPL37A;FDFT1
dorsal pallium/isocortex	7/301	0.738489	0.999962	0	0	0.827413	0.250829	ACAP3;MEF2C;ENC1;TNRC18;PTN;HMGCR;DUSP6
dorsal part of m1A	7/301	0.738489	0.999962	0	0	0.827413	0.250829	CCND1;RPS8;RPL27A;PKIA;RPL37A;SNCG;RPS24
dorsal tier of thalamus	7/301	0.738489	0.999962	0	0	0.827413	0.250829	RAB3C;RIMS3;RGS16;ZIC1;CTNNB1;L1CAM;CLASP2
external globus pallidum	7/301	0.738489	0.999962	0	0	0.827413	0.250829	RGS2;RAB31;GPX1;TTYH1;CRABP1;COL6A1;LSS
forebrain	7/301	0.738489	0.999962	0	0	0.827413	0.250829	MEF2C;NCAN;ENC1;DCX;CELF5;INHBA;DUSP6
insular cortex	7/301	0.738489	0.999962	0	0	0.827413	0.250829	ACTR2;TYROBP;GNG2;LAPTM5;PLAUR;ACTN4;IER3
intercalate nucleus	7/301	0.738489	0.999962	0	0	0.827413	0.250829	RAB31;GPX1;RGS16;PNOC;NR2F1;RPL27;SAT1
intermediate part of r10B	7/301	0.738489	0.999962	0	0	0.827413	0.250829	TOP2A;LGALS1;GPX1;HMGA1;MSN;YWHAZ;S100A10
intermediate stratum of AStr	7/301	0.738489	0.999962	0	0	0.827413	0.250829	RGS2;TTR;CHL1;COL6A1;XPR1;WLS;PRPH
intermediate stratum of PcPL	7/301	0.738489	0.999962	0	0	0.827413	0.250829	NGRN;RIMS3;RGS16;LAPTM5;TNC;S100A4;NR3C1
intermediate stratum of RtC	7/301	0.738489	0.999962	0	0	0.827413	0.250829	RAB31;GPX1;TTR;CD82;RGS16;PNOC;NR2F1
intermediate stratum of SeStr	7/301	0.738489	0.999962	0	0	0.827413	0.250829	GNAO1;RGS2;ALCAM;TSC22D1;COL6A1;YBX1;PHLDA1
intermediate stratum of VPrP	7/301	0.738489	0.999962	0	0	0.827413	0.250829	GNAO1;TYROBP;GNG2;RPL21;HMGCR;SREBF2;VAMP2
intermediate stratum of cerebellar vermis	7/301	0.738489	0.999962	0	0	0.827413	0.250829	CD63;BTG1;TTR;ITGB2;SOX11;S100A4;NEUROG2
intermediate stratum of m2B	7/301	0.738489	0.999962	0	0	0.827413	0.250829	IL1B;RPL12;DPYSL3;PNOC;PLXNA1;SNCG;EBF3
intermediate stratum of p2B	7/301	0.738489	0.999962	0	0	0.827413	0.250829	SERPINE2;RPS8;SDC2;RGS16;EBF3;TMBIM6;LSS
intermediate stratum of p3ZL	7/301	0.738489	0.999962	0	0	0.827413	0.250829	RAB31;GPX1;RGS16;PNOC;NR2F1;RPL27;SAT1
intermediate stratum of r1BL	7/301	0.738489	0.999962	0	0	0.827413	0.250829	MMP14;RPS18;NRG4;PLXNA1;SNCG;RPL37;S100A10
intermediate stratum of r1BM	7/301	0.738489	0.999962	0	0	0.827413	0.250829	CSTB;GNG2;DPYSL5;SDC2;PNOC;AMPD3;S100A10
intermediate stratum of r7Lim	7/301	0.738489	0.999962	0	0	0.827413	0.250829	ACLY;SYT4;NRG4;TAGLN2;HLA-A;LSS;EIF4B
island of Calleja major	7/301	0.738489	0.999962	0	0	0.827413	0.250829	RGS2;ALCAM;TSC22D1;PEG10;COL6A1;DCX;PHLDA1
isthmic portion of paranigral nucleus	7/301	0.738489	0.999962	0	0	0.827413	0.250829	TUBA1A;YWHAQ;SCRN1;SDC2;PNOC;DNER;AP2M1
isthmic roof plate	7/301	0.738489	0.999962	0	0	0.827413	0.250829	CD63;FADS2;BTG1;PTPRZ1;PKIA;DBI;VIM
juxtacommissural pretectal domain	7/301	0.738489	0.999962	0	0	0.827413	0.250829	NGRN;RPL27A;PKIA;RGS16;LAPTM5;TNC;PRDX6
lateral TG part of the periaqueductal gray	7/301	0.738489	0.999962	0	0	0.827413	0.250829	CSTB;SERPINE2;RPS8;STXBP1;TTC3;HNRNPA2B1;SNCG
lateral part of alar p3	7/301	0.738489	0.999962	0	0	0.827413	0.250829	RAB31;GPX1;TTR;CD82;RGS16;PNOC;NR2F1
lateral part of preisthmic periaqueductal gray	7/301	0.738489	0.999962	0	0	0.827413	0.250829	SERPINE2;RPS18;RPS8;HMGA1;SNCG;EBF3;AGRN
lateral part of r6B	7/301	0.738489	0.999962	0	0	0.827413	0.250829	LGALS1;NRG4;RPL12;GPC2;MSN;HLA-A;S100A10
laterodorsal nucleus	7/301	0.738489	0.999962	0	0	0.827413	0.250829	CD63;TTR;CD82;RGS16;IGFBP2;ITGB2;CNN3
layer 2 of LOT	7/301	0.738489	0.999962	0	0	0.827413	0.250829	ACAP3;MARCKSL1;RPL21;IL1B;HDGF;CXCL13;AP2M1
layer 6 of FCx	7/301	0.738489	0.999962	0	0	0.827413	0.250829	TMEFF1;ACAP3;LASP1;TYROBP;LRP1;MYO5A;SEPT3
layer 6 of PCx	7/301	0.738489	0.999962	0	0	0.827413	0.250829	LASP1;LRP1;KIF5C;PPT1;MYO5A;SYT13;IER3
layer 6 of PaS	7/301	0.738489	0.999962	0	0	0.827413	0.250829	CAP1;CDKN1A;NR2F1;HDGF;NR3C1;TRIB2;PAFAH1B1
layer 6a of PaS	7/301	0.738489	0.999962	0	0	0.827413	0.250829	CAP1;CHL1;CCL20;NR2F1;HDGF;NR3C1;TRIB2
layer 6b of PaS	7/301	0.738489	0.999962	0	0	0.827413	0.250829	TOP2A;CAP1;CDKN1A;COL6A1;NR2F1;HDGF;NR3C1
liminal part of alar isthmus	7/301	0.738489	0.999962	0	0	0.827413	0.250829	RGS2;PEG10;RPS6;SNCG;EBF3;RPS20;FXYD6
liminal part of alar r1	7/301	0.738489	0.999962	0	0	0.827413	0.250829	LGALS1;RPS18;PLXNA1;SNCG;RPS20;RPL37;LCP1
liminal part of the r7 alar plate	7/301	0.738489	0.999962	0	0	0.827413	0.250829	ACLY;SYT4;NRG4;TAGLN2;HLA-A;LSS;EIF4B
m1 part of paranigral nucleus	7/301	0.738489	0.999962	0	0	0.827413	0.250829	GRN;YWHAQ;SDC2;PNOC;DNER;SNCG;VIM
m2 part of paranigral nucleus	7/301	0.738489	0.999962	0	0	0.827413	0.250829	IFITM3;GRN;FCER1G;SDC2;IGFBP3;DNER;VIM
mantle zone of AOB	7/301	0.738489	0.999962	0	0	0.827413	0.250829	IL1RN;RAB31;IL1B;DCX;INHBA;SOX4;SMARCA4
mantle zone of DTTh	7/301	0.738489	0.999962	0	0	0.827413	0.250829	RAB3C;RIMS3;RGS16;ZIC1;CTNNB1;L1CAM;CLASP2
mantle zone of InsCx	7/301	0.738489	0.999962	0	0	0.827413	0.250829	ACTR2;TYROBP;GNG2;LAPTM5;PLAUR;ACTN4;IER3
mantle zone of RtC	7/301	0.738489	0.999962	0	0	0.827413	0.250829	RAB31;GPX1;TTR;CD82;RGS16;PNOC;NR2F1
mantle zone of StrSe	7/301	0.738489	0.999962	0	0	0.827413	0.250829	SOX2;SYT4;RGS2;ALCAM;ZIC1;EBF3;XPR1
mantle zone of isLim	7/301	0.738489	0.999962	0	0	0.827413	0.250829	RGS2;PEG10;RPS6;SNCG;EBF3;RPS20;FXYD6
mantle zone of m1AD	7/301	0.738489	0.999962	0	0	0.827413	0.250829	CCND1;RPS8;RPL27A;PKIA;RPL37A;SNCG;RPS24
mantle zone of p1B	7/301	0.738489	0.999962	0	0	0.827413	0.250829	IFITM3;SLC38A1;SDC2;SNCG;EBF3;CXCL13;LSS
mantle zone of r10BI	7/301	0.738489	0.999962	0	0	0.827413	0.250829	TOP2A;LGALS1;GPX1;HMGA1;MSN;YWHAZ;S100A10
mantle zone of r1Lim	7/301	0.738489	0.999962	0	0	0.827413	0.250829	LGALS1;RPS18;PLXNA1;SNCG;RPS20;RPL37;LCP1
mantle zone of r1Tr	7/301	0.738489	0.999962	0	0	0.827413	0.250829	LGALS1;RPS18;SPP1;RPS20;SAT1;NEUROG2;ATP9A
mantle zone of r6BL	7/301	0.738489	0.999962	0	0	0.827413	0.250829	LGALS1;NRG4;RPL12;GPC2;MSN;HLA-A;S100A10
mantle zone of r7Lim	7/301	0.738489	0.999962	0	0	0.827413	0.250829	ACLY;SYT4;NRG4;TAGLN2;HLA-A;LSS;EIF4B
mantle zone of r9Ve	7/301	0.738489	0.999962	0	0	0.827413	0.250829	IGFBP3;EBF3;TAGLN2;PLIN2;UBA1;A2M;YWHAZ
medial (fastigial) cerebellar nucleus	7/301	0.738489	0.999962	0	0	0.827413	0.250829	CD63;BTG1;ITGB2;SOX11;S100A4;HSPG2;NEUROG2
medial (magnocellular) part of MD	7/301	0.738489	0.999962	0	0	0.827413	0.250829	RAB3C;RIMS3;DPYSL5;RGS16;CTNNB1;L1CAM;CLASP2
medial (main) part of Med	7/301	0.738489	0.999962	0	0	0.827413	0.250829	CD63;CD82;RPLP0;IGFBP2;ITGB2;S100A4;HSPG2
medial amygdala, anteroventral part	7/301	0.738489	0.999962	0	0	0.827413	0.250829	ACAP3;MARCKSL1;RPL21;NR2F1;HDGF;TRIB2;AP2M1
medial superior olive	7/301	0.738489	0.999962	0	0	0.827413	0.250829	LGALS1;NRG4;PABPC4;IL1B;RPL12;RPS13;S100A10
neuropeptide-S nucleus	7/301	0.738489	0.999962	0	0	0.827413	0.250829	TMEFF1;ACLY;SNCG;PLIN2;RPS27A;SAT1;FDFT1
nucleus subcoeruleus, r1 part	7/301	0.738489	0.999962	0	0	0.827413	0.250829	TMEFF1;ACLY;TNC;SNCG;SAT1;S100A10;FDFT1
oculomotor nucleus, main part	7/301	0.738489	0.999962	0	0	0.827413	0.250829	ACLY;LGALS1;SPP1;MSN;SNCG;YWHAZ;AP2M1
p1 portion of the paranigral nucleus	7/301	0.738489	0.999962	0	0	0.827413	0.250829	SDC2;DNER;SNCG;TIMP1;VIM;A2M;LSS
p2 part of the zona limitans core population	7/301	0.738489	0.999962	0	0	0.827413	0.250829	RAB3C;RAB31;GPX1;IL1B;RGS16;L1CAM;SAT1
p2 portion of the parabrachial pigmented nucleus	7/301	0.738489	0.999962	0	0	0.827413	0.250829	SERPINE2;YWHAQ;SDC2;SNCG;EBF3;AP2M1;FDFT1
p2 portion of the substantia nigra pars compacta	7/301	0.738489	0.999962	0	0	0.827413	0.250829	VAT1;SLC38A1;YWHAQ;SDC2;SNCG;VAMP2;AP2M1
p3 portion of parabrachial pigmented nucleus	7/301	0.738489	0.999962	0	0	0.827413	0.250829	SERPINE2;YWHAQ;SDC2;IGFBP2;SNCG;EBF3;AP2M1
periventricular stratum of APal	7/301	0.738489	0.999962	0	0	0.827413	0.250829	CD63;FADS2;RGS2;TTR;ITGB2;DBI;LSS
periventricular stratum of AStr	7/301	0.738489	0.999962	0	0	0.827413	0.250829	RGS2;RPL21;ITGB2;COL6A1;TNC;LSS;XPR1
periventricular stratum of RMa	7/301	0.738489	0.999962	0	0	0.827413	0.250829	IFITM3;IL1RN;RGS1;S100A6;S100A4;TIMP1;VIM
periventricular stratum of m2AL	7/301	0.738489	0.999962	0	0	0.827413	0.250829	SERPINE2;RPS18;RPS8;HMGA1;SNCG;EBF3;AGRN
periventricular stratum of r2Co	7/301	0.738489	0.999962	0	0	0.827413	0.250829	CD164;MMP14;BTG1;CD82;IGFBP2;ZIC1;ZFP36L1
periventricular stratum of r3Lim	7/301	0.738489	0.999962	0	0	0.827413	0.250829	GPX1;CD82;DPYSL5;IGFBP2;SNCG;PLIN2;WLS
periventricular stratum of r5Ve	7/301	0.738489	0.999962	0	0	0.827413	0.250829	TTR;IGFBP2;ITGB2;SOX11;INHBA;A2M;WLS
periventricular stratum of r8Tr	7/301	0.738489	0.999962	0	0	0.827413	0.250829	FASN;IGFBP3;TAGLN2;PLIN2;A2M;YWHAZ;S100A10
periventricular stratum of r9BM	7/301	0.738489	0.999962	0	0	0.827413	0.250829	TOP2A;ACLY;LGALS1;GDF15;RPL12;MSN;S100A10
posterior intralaminar nucleus	7/301	0.738489	0.999962	0	0	0.827413	0.250829	RIMS3;YWHAQ;RGS16;L1CAM;LSS;IER3;YWHAH
posteromedial cortical amygdaloid area	7/301	0.738489	0.999962	0	0	0.827413	0.250829	MARCKSL1;TSC22D1;RPS7;PKIA;NR2F1;CDH13;CXCL13
prethalamic tegmentum	7/301	0.738489	0.999962	0	0	0.827413	0.250829	RGS1;SDC2;PABPC4;IL1B;EBF3;TMBIM6;CXCL13
prethalamus	7/301	0.738489	0.999962	0	0	0.827413	0.250829	RAB31;GPX1;TTR;CD82;RGS16;PNOC;NR2F1
prosomere 2	7/301	0.738489	0.999962	0	0	0.827413	0.250829	RAB3C;RIMS3;RGS16;ZIC1;CTNNB1;L1CAM;LSS
prosomere 3	7/301	0.738489	0.999962	0	0	0.827413	0.250829	RAB31;GPX1;TTR;CD82;RGS16;NR2F1;TMBIM6
r1 part of basolateral reticular formation	7/301	0.738489	0.999962	0	0	0.827413	0.250829	MMP14;RPS18;NRG4;PLXNA1;SNCG;RPL37;S100A10
r1 part of trigeminal sensory column	7/301	0.738489	0.999962	0	0	0.827413	0.250829	LGALS1;RPS18;SPP1;RPS20;SAT1;NEUROG2;ATP9A
r2 part of dorsal cochlear nucleus	7/301	0.738489	0.999962	0	0	0.827413	0.250829	CD164;MMP14;BTG1;CD82;IGFBP2;ZIC1;ZFP36L1
r2 part of median raphe nucleus	7/301	0.738489	0.999962	0	0	0.827413	0.250829	YWHAQ;SPP1;RPL37;AMPD3;L1CAM;YWHAZ;AP2M1
r3 liminal central gray	7/301	0.738489	0.999962	0	0	0.827413	0.250829	GPX1;CD82;DPYSL5;IGFBP2;SNCG;PLIN2;WLS
r5 part of A5 noradrenergic cell group	7/301	0.738489	0.999962	0	0	0.827413	0.250829	ACLY;LGALS1;YWHAQ;GPC2;LCP1;MMP9;PRPH
r5 part of parvocellular medial vestibular nucleus	7/301	0.738489	0.999962	0	0	0.827413	0.250829	TTR;IGFBP2;ITGB2;SOX11;INHBA;A2M;WLS
r6 alar plate	7/301	0.738489	0.999962	0	0	0.827413	0.250829	ACLY;LGALS1;NRG4;RPL12;MSN;SOX11;EIF4B
r7 part of ventral parvicellular reticular formation	7/301	0.738489	0.999962	0	0	0.827413	0.250829	ACLY;SYT4;NRG4;TAGLN2;HLA-A;LSS;EIF4B
r8 (gustatory) part of solitary complex	7/301	0.738489	0.999962	0	0	0.827413	0.250829	FASN;IGFBP3;TAGLN2;PLIN2;A2M;YWHAZ;S100A10
r8 part of lateral reticular nucleus	7/301	0.738489	0.999962	0	0	0.827413	0.250829	TOP2A;TRIM28;TSC22D1;NRG4;IL1B;HLA-A;EIF4B
r9 part of the lateral reticular nucleus	7/301	0.738489	0.999962	0	0	0.827413	0.250829	TOP2A;SYT4;TRIM28;NRG4;IL1B;S100A4;EIF4B
r9 part of the vestibular column	7/301	0.738489	0.999962	0	0	0.827413	0.250829	IGFBP3;EBF3;TAGLN2;PLIN2;UBA1;A2M;YWHAZ
r9 portion of the hypoglossal motor nucleus	7/301	0.738489	0.999962	0	0	0.827413	0.250829	ACLY;LGALS1;GPX1;RPL12;MSN;YWHAZ;S100A10
reticular complex	7/301	0.738489	0.999962	0	0	0.827413	0.250829	RAB31;GPX1;TTR;CD82;RGS16;PNOC;NR2F1
reticular formation of JcPL	7/301	0.738489	0.999962	0	0	0.827413	0.250829	NGRN;RPL18A;GDF15;PKIA;RGS16;LAPTM5;TNC
reticular nucleus	7/301	0.738489	0.999962	0	0	0.827413	0.250829	RAB31;GPX1;TTR;CD82;RGS16;PNOC;NR2F1
retromammillary area, medial part	7/301	0.738489	0.999962	0	0	0.827413	0.250829	IFITM3;IL1RN;RGS1;S100A6;S100A4;TIMP1;VIM
retrotrapezoid nucleus	7/301	0.738489	0.999962	0	0	0.827413	0.250829	LGALS1;NRG4;RPL12;MSN;HLA-A;RPS13;S100A10
root	7/301	0.738489	0.999962	0	0	0.827413	0.250829	MEF2C;FABP7;ENC1;ZIC1;CELF5;A2M;DUSP6
rostral interpeduncular nucleus	7/301	0.738489	0.999962	0	0	0.827413	0.250829	IL1RN;GRN;FCER1G;YWHAQ;SDC2;IGFBP3;VIM
sublayer 6a of FCx	7/301	0.738489	0.999962	0	0	0.827413	0.250829	TMEFF1;ACAP3;LASP1;TYROBP;LRP1;MYO5A;SEPT3
sublayer 6b of CCx	7/301	0.738489	0.999962	0	0	0.827413	0.250829	TOP2A;GNB1;GRIK3;MYO5A;HMGCR;NR3C1;SEPT3
superficial mantle of isBM	7/301	0.738489	0.999962	0	0	0.827413	0.250829	VAT1;YWHAQ;SDC2;CRABP1;SNCG;L1CAM;LSS
superficial stratum of AOB	7/301	0.738489	0.999962	0	0	0.827413	0.250829	IL1RN;RAB31;IL1B;DCX;INHBA;SOX4;SMARCA4
superficial stratum of InsCx (cortical plate/marginal zone)	7/301	0.738489	0.999962	0	0	0.827413	0.250829	ACTR2;TYROBP;GNG2;LAPTM5;PLAUR;ACTN4;IER3
superficial stratum of JcPL	7/301	0.738489	0.999962	0	0	0.827413	0.250829	RPL18A;GDF15;PKIA;RGS16;PEA15;RPL37;FGFBP3
superficial stratum of m2B	7/301	0.738489	0.999962	0	0	0.827413	0.250829	VAT1;GRN;YWHAQ;SDC2;SNCG;VIM;AP2M1
superficial stratum of r5Lim	7/301	0.738489	0.999962	0	0	0.827413	0.250829	ACLY;LGALS1;YWHAQ;PRDX1;ALOX5AP;GPC2;MMP9
superficial stratum of r6BL	7/301	0.738489	0.999962	0	0	0.827413	0.250829	LGALS1;NRG4;RPL12;MSN;HLA-A;RPS13;S100A10
superior periolivary nucleus	7/301	0.738489	0.999962	0	0	0.827413	0.250829	IL1RN;LGALS1;NRG4;SPP1;TREM2;HLA-A;LCP1
terminal hypothalamus (rostral hypothalamus)	7/301	0.738489	0.999962	0	0	0.827413	0.250829	IFITM3;DLX1;TRIM28;PEG10;SDC2;CRABP1;CXCL13
ventral linear nucleus	7/301	0.738489	0.999962	0	0	0.827413	0.250829	RIMS3;YWHAQ;IL1B;RGS16;L1CAM;LSS;IER3
ventral posterior parvicellular nucleus	7/301	0.738489	0.999962	0	0	0.827413	0.250829	RIMS3;YWHAQ;IL1B;RGS16;L1CAM;AGRN;LSS
ventrolateral part of isA	7/301	0.738489	0.999962	0	0	0.827413	0.250829	RGS2;PEG10;RPS6;SNCG;EBF3;RPS20;FXYD6
Field CA1, stratum oriens	8/343	0.744456	0.999962	0	0	0.829612	0.24482	TMEFF1;ACTR2;FOXG1;PLXNA1;CELF5;PFN1;NR3C1;DUSP6
Medial mammillary nucleus	9/388	0.758407	0.999962	0	0	0.82456	0.228019	IFITM3;IL1RN;DPYSL5;RPL12;S100A6;TXNIP;SOX11;RPL37;TIMP1
Field CA2, stratum oriens	10/431	0.766343	0.999962	0	0	0.824462	0.219411	TOP2A;GNAO1;MMP14;TTR;YWHAB;FOXG1;PLXNA1;SH3BGRL3;PFN1;VAMP2
Central amygdalar nucleus, lateral part	9/401	0.790775	0.999962	0	0	0.796671	0.187012	RGS2;TTR;RPL21;CHL1;COL6A1;DBI;LSS;XPR1;PRPH
Dentate gyrus	7/320	0.792629	0.999962	0	0	0.776416	0.180439	RPS7;PKIA;RPL22;ISLR2;FAU;PFN1;XPR1
Thalamus	7/334	0.8268	0.999962	0	0	0.742631	0.141243	RAB3C;RIMS3;GPX1;RGS16;ZIC1;CTNNB1;L1CAM
Field CA2	9/425	0.841963	0.999962	0	0	0.749764	0.128974	GNAO1;MMP14;FOXG1;ITGB2;PLXNA1;ISLR2;TREM2;PFN1;VAMP2
Accessory facial motor nucleus	6/301	0.84831	0.999962	0	0	0.70549	0.11606	LGALS1;YWHAQ;SNCG;LCP1;MMP9;PRPH
Agranular insular area, dorsal part	6/301	0.84831	0.999962	0	0	0.70549	0.11606	TMEFF1;ACTR2;TYROBP;GNG2;ACTN4;TRIB2
Ammon's horn	6/301	0.84831	0.999962	0	0	0.70549	0.11606	FOXG1;ISLR2;PLXNA1;CRMP1;PFN1;VAMP2
Anterior olfactory nucleus	6/301	0.84831	0.999962	0	0	0.70549	0.11606	IL1RN;GDF15;CRABP1;DCX;SOX11;INHBA
Anterior olfactory nucleus, external part	6/301	0.84831	0.999962	0	0	0.70549	0.11606	IL1RN;GDF15;CRABP1;DCX;INHBA;SMARCA4
Anterior olfactory nucleus, layer 1	6/301	0.84831	0.999962	0	0	0.70549	0.11606	IL1RN;GDF15;LAPTM5;SOX11;INHBA;NEUROG2
Anterolateral visual area, layer 5	6/301	0.84831	0.999962	0	0	0.70549	0.11606	PLAUR;PTN;HMGCR;SYT13;RPS27A;TPT1
Anterolateral visual area, layer 6b	6/301	0.84831	0.999962	0	0	0.70549	0.11606	MYL6;PLAUR;HMGCR;SYT13;NR3C1;IER3
Anteroventral preoptic nucleus	6/301	0.84831	0.999962	0	0	0.70549	0.11606	FCER1G;NRG4;PEG10;S100A4;UBA1;SMARCA4
Basomedial amygdalar nucleus, posterior part	6/301	0.84831	0.999962	0	0	0.70549	0.11606	GNG2;DNER;NR2F1;LCP1;AP2M1;PRPH
Bed nucleus of the accessory olfactory tract	6/301	0.84831	0.999962	0	0	0.70549	0.11606	IFITM3;MARCKSL1;RPL21;HDGF;CXCL13;PRDX6
Caudoputamen	6/301	0.84831	0.999962	0	0	0.70549	0.11606	CAP1;RGS2;SERPINE2;SCRN1;TTYH1;ATP2B1
Central lobule	6/301	0.84831	0.999962	0	0	0.70549	0.11606	BTG1;PTPRZ1;ZIC1;TNC;VIM;A2M
Cerebral nuclei	6/301	0.84831	0.999962	0	0	0.70549	0.11606	CAP1;RGS2;ALCAM;SERPINE2;TTYH1;COL6A1
Cerebrum	6/301	0.84831	0.999962	0	0	0.70549	0.11606	MEF2C;ENC1;DCX;CELF5;INHBA;DUSP6
Cortical amygdalar area, anterior part, layer 2	6/301	0.84831	0.999962	0	0	0.70549	0.11606	MARCKSL1;TRIM28;PSAP;TRIB2;AP2M1;PRPH
Cortical amygdalar area, posterior part	6/301	0.84831	0.999962	0	0	0.70549	0.11606	MARCKSL1;TRIM28;PKIA;NR2F1;CDH13;AP2M1
Cortical amygdalar area, posterior part, lateral zone, layer 3	6/301	0.84831	0.999962	0	0	0.70549	0.11606	MARCKSL1;TSC22D1;RPS7;PKIA;NR2F1;AP2M1
Cuneate nucleus	6/301	0.84831	0.999962	0	0	0.70549	0.11606	IGFBP3;TNC;S100A6;PLIN2;A2M;YWHAZ
Dorsal column nuclei	6/301	0.84831	0.999962	0	0	0.70549	0.11606	IGFBP3;TNC;S100A6;PLIN2;A2M;YWHAZ
Dorsal peduncular area, layer 1	6/301	0.84831	0.999962	0	0	0.70549	0.11606	FCER1G;GDF15;S100A4;HLA-A;HSPG2;NEUROG2
Dorsal peduncular area, layer 2/3	6/301	0.84831	0.999962	0	0	0.70549	0.11606	FCER1G;GDF15;CRABP1;CDH13;SOX11;VAMP2
Dorsal peduncular area, layer 5	6/301	0.84831	0.999962	0	0	0.70549	0.11606	TOP2A;GDF15;YWHAB;FLNA;CDH13;SOX11
Epithalamus	6/301	0.84831	0.999962	0	0	0.70549	0.11606	CD63;FADS2;SCRN1;ITGB2;ZIC1;XPR1
Field CA1, pyramidal layer	6/301	0.84831	0.999962	0	0	0.70549	0.11606	FOXG1;TRIM2;PLXNA1;CELF5;PFN1;DUSP6
Field CA1, stratum pyramidale	6/301	0.84831	0.999962	0	0	0.70549	0.11606	YWHAB;FOXG1;TRIM2;PLXNA1;PFN1;DUSP6
Flocculus	6/301	0.84831	0.999962	0	0	0.70549	0.11606	BTG1;ITGB2;ZIC1;ATN1;A2M;ZFP36L1
Fundus of striatum	6/301	0.84831	0.999962	0	0	0.70549	0.11606	ACAP3;RGS2;RPL21;IL1B;COL6A1;PRPH
Globus pallidus, external segment	6/301	0.84831	0.999962	0	0	0.70549	0.11606	RGS2;RAB31;GPX1;CCL20;CRABP1;LSS
Inferior olivary complex	6/301	0.84831	0.999962	0	0	0.70549	0.11606	TOP2A;TRIM28;TIMP1;A2M;RPS13;SMARCA4
Infralimbic area, layer 2	6/301	0.84831	0.999962	0	0	0.70549	0.11606	FCER1G;RAB31;GDF15;CRABP1;SOX11;NEUROG2
Infralimbic area, layer 6a	6/301	0.84831	0.999962	0	0	0.70549	0.11606	RPL5;CDKN1A;PPP2R1A;GRIK3;S100A6;DUSP6
Lateral group of the dorsal thalamus	6/301	0.84831	0.999962	0	0	0.70549	0.11606	NGRN;RIMS3;RGS16;TNC;L1CAM;NR3C1
Lateral reticular nucleus	6/301	0.84831	0.999962	0	0	0.70549	0.11606	TOP2A;SYT4;TRIM28;NRG4;S100A4;EIF4B
Lateral reticular nucleus, magnocellular part	6/301	0.84831	0.999962	0	0	0.70549	0.11606	TOP2A;SYT4;TRIM28;NRG4;S100A4;EIF4B
Lobule II	6/301	0.84831	0.999962	0	0	0.70549	0.11606	BTG1;PTPRZ1;ZIC1;DBI;VIM;A2M
Lobule II, granular layer	6/301	0.84831	0.999962	0	0	0.70549	0.11606	BTG1;PTPRZ1;ZIC1;DBI;VIM;A2M
Lobule II, molecular layer	6/301	0.84831	0.999962	0	0	0.70549	0.11606	BTG1;PTPRZ1;ZIC1;DBI;VIM;A2M
Lobule III, molecular layer	6/301	0.84831	0.999962	0	0	0.70549	0.11606	BTG1;PTPRZ1;ZIC1;TNC;VIM;A2M
Mammillary body	6/301	0.84831	0.999962	0	0	0.70549	0.11606	RPL12;S100A6;TXNIP;RPL37;TIMP1;CXCL13
Medial habenula	6/301	0.84831	0.999962	0	0	0.70549	0.11606	CD63;FADS2;SCRN1;ITGB2;VIM;XPR1
Medial septal complex	6/301	0.84831	0.999962	0	0	0.70549	0.11606	SYT4;ALCAM;PEG10;PABPC4;ZIC1;UBA1
Mediodorsal nucleus of thalamus	6/301	0.84831	0.999962	0	0	0.70549	0.11606	RAB3C;RIMS3;RGS16;ZIC1;CTNNB1;L1CAM
Nucleus ambiguus	6/301	0.84831	0.999962	0	0	0.70549	0.11606	TOP2A;NRG4;HLA-A;LSS;EIF4B;ZMPSTE24
Nucleus ambiguus, ventral division	6/301	0.84831	0.999962	0	0	0.70549	0.11606	TRIM28;NRG4;HLA-A;LSS;EIF4B;ZMPSTE24
Orbital area, medial part	6/301	0.84831	0.999962	0	0	0.70549	0.11606	IL1RN;FCER1G;CRABP1;S100A6;HSPG2;NEUROG2
Orbital area, medial part, layer 1	6/301	0.84831	0.999962	0	0	0.70549	0.11606	IL1RN;FCER1G;CRABP1;DCX;HSPG2;NEUROG2
Orbital area, medial part, layer 2	6/301	0.84831	0.999962	0	0	0.70549	0.11606	IL1RN;FCER1G;GDF15;CRABP1;S100A6;NEUROG2
Orbital area, medial part, layer 2/3	6/301	0.84831	0.999962	0	0	0.70549	0.11606	IL1RN;FCER1G;GDF15;CRABP1;S100A6;NEUROG2
Orbital area, medial part, layer 6a	6/301	0.84831	0.999962	0	0	0.70549	0.11606	CDKN1A;RBFOX2;PPT1;S100A6;SH3BGRL3;HDGF
Pallidum, dorsal region	6/301	0.84831	0.999962	0	0	0.70549	0.11606	RGS2;RAB31;GPX1;CCL20;CRABP1;LSS
Pallidum, medial region	6/301	0.84831	0.999962	0	0	0.70549	0.11606	SYT4;ALCAM;PEG10;ZIC1;TXNIP;UBA1
Parabrachial nucleus, lateral division, dorsal lateral part	6/301	0.84831	0.999962	0	0	0.70549	0.11606	CADM3;SPARC;FABP7;TNC;RPS20;NCAM1
Paragigantocellular reticular nucleus, lateral part	6/301	0.84831	0.999962	0	0	0.70549	0.11606	TOP2A;TRIM28;NRG4;HLA-A;EIF4B;S100A10
Parasolitary nucleus	6/301	0.84831	0.999962	0	0	0.70549	0.11606	IGFBP3;S100A6;TAGLN2;PLIN2;A2M;YWHAZ
Piriform-amygdalar area, polymorph layer	6/301	0.84831	0.999962	0	0	0.70549	0.11606	MARCKSL1;TRIM28;TSC22D1;PKIA;PLIN2;AP2M1
Posterior complex of the thalamus	6/301	0.84831	0.999962	0	0	0.70549	0.11606	RIMS3;RGS16;TNC;L1CAM;NR3C1;IER3
Posterior parietal association areas, layer 2/3	6/301	0.84831	0.999962	0	0	0.70549	0.11606	CDKN1A;ENC1;TNRC18;UBA1;HSPG2;DUSP6
Posterolateral visual area	6/301	0.84831	0.999962	0	0	0.70549	0.11606	LASP1;PLAUR;HMGCR;NR3C1;DUSP6;PRPH
Prelimbic area, layer 1	6/301	0.84831	0.999962	0	0	0.70549	0.11606	SQLE;IL1RN;DCX;NEUROG2;ATP9A;SMARCA4
Prelimbic area, layer 6a	6/301	0.84831	0.999962	0	0	0.70549	0.11606	RBFOX2;GRIK3;S100A6;MYO5A;SH3BGRL3;SEPT3
Presubiculum, layer 3	6/301	0.84831	0.999962	0	0	0.70549	0.11606	CAP1;TMEFF1;CHL1;NR3C1;TRIB2;PRPH
Primary motor area	6/301	0.84831	0.999962	0	0	0.70549	0.11606	TMEFF1;ACAP3;NGRN;TYROBP;SH3BGRL3;HMGCR
Primary motor area, Layer 5	6/301	0.84831	0.999962	0	0	0.70549	0.11606	TMEFF1;ACAP3;NGRN;SH3BGRL3;PTN;HMGCR
Primary motor area, Layer 6a	6/301	0.84831	0.999962	0	0	0.70549	0.11606	TMEFF1;NGRN;TYROBP;SCRN1;LRP1;MYO5A
Primary somatosensory area, barrel field, layer 6b	6/301	0.84831	0.999962	0	0	0.70549	0.11606	ACTR2;KIF5C;COL6A1;PLAUR;ACTN4;IER3
Primary somatosensory area, lower limb, layer 2/3	6/301	0.84831	0.999962	0	0	0.70549	0.11606	TRIM28;FOXG1;ENC1;RPL27;INHBA;HMGCR
Primary somatosensory area, lower limb, layer 6a	6/301	0.84831	0.999962	0	0	0.70549	0.11606	TMEFF1;NGRN;SCRN1;LRP1;MYO5A;SYT13
Primary somatosensory area, mouth, layer 5	6/301	0.84831	0.999962	0	0	0.70549	0.11606	LASP1;TYROBP;CIRBP;PLAUR;PTN;B2M
Primary somatosensory area, mouth, layer 6a	6/301	0.84831	0.999962	0	0	0.70549	0.11606	TMEFF1;ACAP3;LASP1;TYROBP;KIF5C;PPT1
Primary somatosensory area, mouth, layer 6b	6/301	0.84831	0.999962	0	0	0.70549	0.11606	TMEFF1;ACAP3;KIF5C;FASN;ACTN4;SYT13
Primary somatosensory area, nose	6/301	0.84831	0.999962	0	0	0.70549	0.11606	LASP1;TYROBP;PPT1;PLAUR;ACTN4;PTN
Primary somatosensory area, nose, layer 5	6/301	0.84831	0.999962	0	0	0.70549	0.11606	LASP1;PPT1;PLAUR;PTN;B2M;FDFT1
Primary somatosensory area, unassigned, layer 6b	6/301	0.84831	0.999962	0	0	0.70549	0.11606	TMEFF1;ACAP3;IL1RN;LRP1;FASN;PLAUR
Primary visual area, layer 1	6/301	0.84831	0.999962	0	0	0.70549	0.11606	TRIM28;ENC1;TNRC18;DCLK1;DUSP6;MCL1
Pyramus (VIII), molecular layer	6/301	0.84831	0.999962	0	0	0.70549	0.11606	BTG1;PTPRZ1;ZIC1;TNC;VIM;A2M
Red nucleus	6/301	0.84831	0.999962	0	0	0.70549	0.11606	IFITM3;SDC2;SNCG;CXCL13;SAT1;FDFT1
Reticular nucleus of the thalamus	6/301	0.84831	0.999962	0	0	0.70549	0.11606	RAB31;GPX1;TTR;CD82;RGS16;NR2F1
Retrosplenial area, lateral agranular part, layer 1	6/301	0.84831	0.999962	0	0	0.70549	0.11606	CDKN1A;TRIM28;PABPC4;ENC1;DUSP6;SMARCA4
Retrosplenial area, lateral agranular part, layer 5	6/301	0.84831	0.999962	0	0	0.70549	0.11606	CDKN1A;TNRC18;S100A4;HMGCR;DUSP6;SMARCA4
Striatum dorsal region	6/301	0.84831	0.999962	0	0	0.70549	0.11606	CAP1;RGS2;SERPINE2;SCRN1;TTYH1;ATP2B1
Subiculum, dorsal part, molecular layer	6/301	0.84831	0.999962	0	0	0.70549	0.11606	RPS25;TMEFF1;BTG1;CHL1;RPL22;TRIB2
Subparafascicular nucleus	6/301	0.84831	0.999962	0	0	0.70549	0.11606	RAB3C;RIMS3;YWHAQ;RGS16;RPL24;LSS
Substantia nigra, reticular part	6/301	0.84831	0.999962	0	0	0.70549	0.11606	GRN;RGS1;PABPC4;ALOX5AP;CXCL13;MMP9
Superior colliculus, optic layer	6/301	0.84831	0.999962	0	0	0.70549	0.11606	IFITM3;GDF15;S100A6;CTNNB1;RPL27;SMARCA4
Superior colliculus, superficial gray layer	6/301	0.84831	0.999962	0	0	0.70549	0.11606	IFITM3;MMP14;GDF15;RPL27;UBA1;SMARCA4
Superior colliculus, zonal layer	6/301	0.84831	0.999962	0	0	0.70549	0.11606	IFITM3;MMP14;GDF15;S100A6;UBA1;SMARCA4
Superior olivary complex, lateral part	6/301	0.84831	0.999962	0	0	0.70549	0.11606	LGALS1;GPC2;RPL37;HLA-A;LCP1;MMP9
Supplemental somatosensory area, layer 6b	6/301	0.84831	0.999962	0	0	0.70549	0.11606	GNAO1;GNG2;PPT1;PLAUR;IER3;FDFT1
Taenia tecta, dorsal part	6/301	0.84831	0.999962	0	0	0.70549	0.11606	TMEFF1;FCER1G;GDF15;CRABP1;S100A4;NEUROG2
Temporal association areas	6/301	0.84831	0.999962	0	0	0.70549	0.11606	YWHAB;PLAUR;PLIN2;SYT13;RPS27A;NR3C1
Ventral posterolateral nucleus of the thalamus	6/301	0.84831	0.999962	0	0	0.70549	0.11606	RAB31;GPX1;RGS16;NR2F1;SAT1;CLASP2
Visual areas	6/301	0.84831	0.999962	0	0	0.70549	0.11606	CDKN1A;TNRC18;PTN;HMGCR;NR3C1;DUSP6
alar plate of evaginated telencephalic vesicle	6/301	0.84831	0.999962	0	0	0.70549	0.11606	MEF2C;ENC1;DCX;CELF5;INHBA;DUSP6
alar plate of p3 (alar prethalamus)	6/301	0.84831	0.999962	0	0	0.70549	0.11606	RAB31;GPX1;TTR;CD82;RGS16;NR2F1
anterior pretectal nucleus, dorsal superficial part	6/301	0.84831	0.999962	0	0	0.70549	0.11606	NGRN;RPL18A;RGS16;PEA15;LAPTM5;TNC
basal plate of p1	6/301	0.84831	0.999962	0	0	0.70549	0.11606	IFITM3;SDC2;SNCG;EBF3;CXCL13;LSS
basomedial amygdaloid nucleus, posterior part	6/301	0.84831	0.999962	0	0	0.70549	0.11606	MARCKSL1;TSC22D1;YWHAB;DNER;NR2F1;AP2M1
caudal secondary prosencephalon	6/301	0.84831	0.999962	0	0	0.70549	0.11606	MEF2C;ENC1;DCX;CELF5;INHBA;DUSP6
cingulate cortex	6/301	0.84831	0.999962	0	0	0.70549	0.11606	TMEFF1;GRIK3;MYO5A;HMGCR;DUSP6;SEPT3
deep gray layer of SC	6/301	0.84831	0.999962	0	0	0.70549	0.11606	RPS8;STXBP1;TTC3;PLXNA1;SNCG;EBF3
dorsal paracommissural tectal nucleus, m1 part	6/301	0.84831	0.999962	0	0	0.70549	0.11606	CCND1;RPS8;RPL37A;CTNNB1;SNCG;RPS24
dorsal part of alar p2	6/301	0.84831	0.999962	0	0	0.70549	0.11606	CD63;FADS2;MMP14;SCRN1;ITGB2;VIM
dorsolateral TG part of the periaqueductal gray	6/301	0.84831	0.999962	0	0	0.70549	0.11606	TRIM28;RPS8;STXBP1;HNRNPA2B1;SNCG;AGRN
dorsomedial preoptic area, superficial part	6/301	0.84831	0.999962	0	0	0.70549	0.11606	FCER1G;NRG4;PEG10;S100A4;UBA1;CXCL13
external part of AOD	6/301	0.84831	0.999962	0	0	0.70549	0.11606	IL1RN;RAB31;GDF15;DCX;SOX4;SMARCA4
habenula (old epithalamus)	6/301	0.84831	0.999962	0	0	0.70549	0.11606	CD63;FADS2;MMP14;SCRN1;ITGB2;VIM
intermediate mantle of isBM	6/301	0.84831	0.999962	0	0	0.70549	0.11606	SDC2;PNOC;AMPD3;YWHAZ;S100A10;FDFT1
intermediate stratum of JcPL	6/301	0.84831	0.999962	0	0	0.70549	0.11606	NGRN;RPL18A;PKIA;RGS16;LAPTM5;TNC
intermediate stratum of Mam	6/301	0.84831	0.999962	0	0	0.70549	0.11606	IFITM3;IL1RN;S100A6;TXNIP;RPL37;TIMP1
intermediate stratum of TSPaA	6/301	0.84831	0.999962	0	0	0.70549	0.11606	IFITM3;PEG10;USP11;HNRNPD;PRRC2B;GNAI2
intermediate stratum of VTTh	6/301	0.84831	0.999962	0	0	0.70549	0.11606	RIMS3;YWHAQ;RGS16;L1CAM;LSS;IER3
intermediate stratum of m1AD	6/301	0.84831	0.999962	0	0	0.70549	0.11606	FADS2;CCND1;RPL27A;PKIA;RPL37A;SNCG
intermediate stratum of r1Lim	6/301	0.84831	0.999962	0	0	0.70549	0.11606	LGALS1;RPS18;RPS20;RPL37;LCP1;MMP9
intermediate stratum of the VAP	6/301	0.84831	0.999962	0	0	0.70549	0.11606	MARCKSL1;YWHAB;DNER;NR2F1;AP2M1;PRPH
intermedioposterior nucleus	6/301	0.84831	0.999962	0	0	0.70549	0.11606	NGRN;RGS16;TNC;S100A4;L1CAM;NR3C1
internal globus pallidus	6/301	0.84831	0.999962	0	0	0.70549	0.11606	RGS2;RAB31;GPX1;CCL20;CRABP1;LSS
intralaminar nuclei	6/301	0.84831	0.999962	0	0	0.70549	0.11606	RIMS3;RGS16;TNC;CTNNB1;L1CAM;NR3C1
lateral IC periaqueductal gray	6/301	0.84831	0.999962	0	0	0.70549	0.11606	SERPINE2;RPS8;HMGA1;SNCG;EBF3;RPL26
lateral part of JcP	6/301	0.84831	0.999962	0	0	0.70549	0.11606	NGRN;RPL18A;PKIA;RGS16;LAPTM5;TNC
lateral part of MM	6/301	0.84831	0.999962	0	0	0.70549	0.11606	IL1RN;FCER1G;RPL12;S100A6;TXNIP;RPL37
lateral part of the lateral habenular nucleus	6/301	0.84831	0.999962	0	0	0.70549	0.11606	CD63;FADS2;GPX1;SCRN1;ITGB2;VIM
lateral superior olive	6/301	0.84831	0.999962	0	0	0.70549	0.11606	LGALS1;NRG4;LAPTM5;GPC2;HLA-A;LCP1
lateropallial prepiriform area	6/301	0.84831	0.999962	0	0	0.70549	0.11606	GNAO1;ACTR2;TYROBP;GNG2;ISLR2;PTN
layer 1 of OCx	6/301	0.84831	0.999962	0	0	0.70549	0.11606	MEF2C;TRIM28;ENC1;TNRC18;DUSP6;SMARCA4
layer 2 of AOD cortex	6/301	0.84831	0.999962	0	0	0.70549	0.11606	IL1RN;GDF15;DCX;SOX11;INHBA;SOX4
layer 3 of AOD cortex	6/301	0.84831	0.999962	0	0	0.70549	0.11606	TOP2A;IL1RN;DCX;PTN;INHBA;SOX4
layer 4 of CCx	6/301	0.84831	0.999962	0	0	0.70549	0.11606	GRIK3;MYO5A;HMGCR;DUSP6;GLTSCR2;SEPT3
layer 4 of InsCx	6/301	0.84831	0.999962	0	0	0.70549	0.11606	ACTR2;LASP1;ACTN4;PTN;TRIB2;PRPH
layer 5 of FCx	6/301	0.84831	0.999962	0	0	0.70549	0.11606	TMEFF1;LASP1;TYROBP;KIF5C;SH3BGRL3;PTN
layer 5 of PCx	6/301	0.84831	0.999962	0	0	0.70549	0.11606	LASP1;LRP1;KIF5C;MYO5A;TNRC18;PTN
layer 5 of PrS	6/301	0.84831	0.999962	0	0	0.70549	0.11606	TMEFF1;HNRNPK;CHL1;RPL22;NR3C1;TRIB2
liminal alar domain of m1	6/301	0.84831	0.999962	0	0	0.70549	0.11606	CSTB;PEG10;SNCG;EBF3;MAPT;PRDX6
m1 part of parabrachialis pigmentosus	6/301	0.84831	0.999962	0	0	0.70549	0.11606	FTH1;SDC2;PNOC;SNCG;ZMPSTE24;FDFT1
m2 part of nucleus parabrachialis pigmentosus	6/301	0.84831	0.999962	0	0	0.70549	0.11606	DPYSL5;FTH1;SDC2;PNOC;ZMPSTE24;FDFT1
m2 part of pararubral nucleus	6/301	0.84831	0.999962	0	0	0.70549	0.11606	IL1B;RPL12;DPYSL3;PNOC;SNCG;AP2M1
mantle zone of APal	6/301	0.84831	0.999962	0	0	0.70549	0.11606	CD63;RGS2;TTR;DBI;LSS;PRPH
mantle zone of CCx	6/301	0.84831	0.999962	0	0	0.70549	0.11606	TMEFF1;GRIK3;MYO5A;HMGCR;DUSP6;SEPT3
mantle zone of CoPV	6/301	0.84831	0.999962	0	0	0.70549	0.11606	RPL27A;TNC;RPL24;ATP5G3;AGRN;PRDX6
mantle zone of Hb	6/301	0.84831	0.999962	0	0	0.70549	0.11606	CD63;FADS2;MMP14;SCRN1;ITGB2;VIM
mantle zone of JcPL	6/301	0.84831	0.999962	0	0	0.70549	0.11606	NGRN;RPL18A;PKIA;RGS16;LAPTM5;TNC
mantle zone of LPrP	6/301	0.84831	0.999962	0	0	0.70549	0.11606	GNAO1;ACTR2;TYROBP;GNG2;ISLR2;PTN
mantle zone of PrS	6/301	0.84831	0.999962	0	0	0.70549	0.11606	TMEFF1;HNRNPK;CHL1;RPL22;NR3C1;TRIB2
mantle zone of TPaA	6/301	0.84831	0.999962	0	0	0.70549	0.11606	PEG10;RGS16;NNAT;FXYD6;CXCL13;RPS21
mantle zone of TSPaA	6/301	0.84831	0.999962	0	0	0.70549	0.11606	IFITM3;PEG10;CRABP1;TXNIP;CXCL13;GNAI2
mantle zone of m1Lim	6/301	0.84831	0.999962	0	0	0.70549	0.11606	CSTB;PEG10;SNCG;EBF3;MAPT;PRDX6
mantle zone of m2B	6/301	0.84831	0.999962	0	0	0.70549	0.11606	SDC2;RPL12;DPYSL3;PNOC;SNCG;EBF3
mantle zone of p2B	6/301	0.84831	0.999962	0	0	0.70549	0.11606	SDC2;RGS16;EBF3;TMBIM6;LSS;VAMP2
mantle zone of p3B	6/301	0.84831	0.999962	0	0	0.70549	0.11606	SDC2;IL1B;EBF3;TMBIM6;CXCL13;VAMP2
mantle zone of r1Ve	6/301	0.84831	0.999962	0	0	0.70549	0.11606	LGALS1;TTR;SPP1;INHBA;NEUROG2;WLS
mantle zone of r2Co	6/301	0.84831	0.999962	0	0	0.70549	0.11606	BTG1;RGS1;IGFBP2;ZIC1;LCP1;ZFP36L1
mantle zone of r3BM	6/301	0.84831	0.999962	0	0	0.70549	0.11606	CSTB;GRN;SLC20A1;SPP1;HMGA1;NEFL
mantle zone of the Fc	6/301	0.84831	0.999962	0	0	0.70549	0.11606	IFITM3;MMP14;IL1B;ITGB2;CD14;LSS
medial habenular nucleus	6/301	0.84831	0.999962	0	0	0.70549	0.11606	CD63;FADS2;MMP14;SCRN1;ITGB2;VIM
medial part of r3B	6/301	0.84831	0.999962	0	0	0.70549	0.11606	CSTB;GRN;SLC20A1;SPP1;HMGA1;NEFL
medial part of the lateral habenular nucleus	6/301	0.84831	0.999962	0	0	0.70549	0.11606	CD63;SCRN1;FABP7;RGS16;ZIC1;CTNNB1
medial subhabenular nucleus	6/301	0.84831	0.999962	0	0	0.70549	0.11606	CD63;FADS2;SCRN1;DPYSL5;ITGB2;ZIC1
medial tuberal nucleus	6/301	0.84831	0.999962	0	0	0.70549	0.11606	VAT1;DLX1;TRIM28;PABPC4;RPL12;CXCL13
nucleus of the inferior collicular brachium, rostral part	6/301	0.84831	0.999962	0	0	0.70549	0.11606	GRN;SPARC;PKIA;RPL12;CD14;VIM
optic fiber layer of SC	6/301	0.84831	0.999962	0	0	0.70549	0.11606	GDF15;S100A6;CTNNB1;RPL27;NEUROG2;SMARCA4
p1 part of parabrachial pigmented nucleus	6/301	0.84831	0.999962	0	0	0.70549	0.11606	IFITM3;YWHAQ;SDC2;SNCG;AP2M1;FDFT1
p1 part of the substantia nigra compacta	6/301	0.84831	0.999962	0	0	0.70549	0.11606	SPARC;YWHAQ;SDC2;SNCG;VAMP2;AP2M1
p1Lim part of periaqueductal gray	6/301	0.84831	0.999962	0	0	0.70549	0.11606	PNOC;TNC;ATP5G3;AGRN;PGM2L1;VAMP2
p3 portion of the substantia nigra pars reticulata	6/301	0.84831	0.999962	0	0	0.70549	0.11606	MMP14;RGS1;FOXG1;PABPC4;ALOX5AP;CXCL13
pallidal amygdala	6/301	0.84831	0.999962	0	0	0.70549	0.11606	CD63;RGS2;TTR;DBI;LSS;PRPH
parvicellular (lateral) subparafascicular nucleus	6/301	0.84831	0.999962	0	0	0.70549	0.11606	RIMS3;YWHAQ;RGS16;L1CAM;LSS;IER3
perirhinal-ectorhinal cortex	6/301	0.84831	0.999962	0	0	0.70549	0.11606	DNAJA1;PLAUR;HMGCR;SYT13;RPS27A;FDFT1
periventricular stratum of Hb	6/301	0.84831	0.999962	0	0	0.70549	0.11606	CD63;FADS2;MMP14;SCRN1;ITGB2;VIM
periventricular stratum of TG	6/301	0.84831	0.999962	0	0	0.70549	0.11606	TRIM28;RPS8;STXBP1;HNRNPA2B1;SNCG;AGRN
periventricular stratum of p1Lim	6/301	0.84831	0.999962	0	0	0.70549	0.11606	PNOC;TNC;ATP5G3;AGRN;PGM2L1;VAMP2
periventricular stratum of r10BM	6/301	0.84831	0.999962	0	0	0.70549	0.11606	TOP2A;DNAJA1;ACLY;LGALS1;MSN;S100A10
periventricular stratum of r6BM	6/301	0.84831	0.999962	0	0	0.70549	0.11606	CSTB;SYT4;TTR;IGFBP3;SNCG;LAMB1
periventricular stratum of r7Co	6/301	0.84831	0.999962	0	0	0.70549	0.11606	FADS2;MMP14;CD82;CCL20;LCP1;WLS
periventricular stratum of r8BM	6/301	0.84831	0.999962	0	0	0.70549	0.11606	ACLY;CD164;LGALS1;RGS1;FAU;S100A10
periventricular stratum of r8Ve	6/301	0.84831	0.999962	0	0	0.70549	0.11606	IGFBP3;TNC;S100A6;PLIN2;A2M;YWHAZ
periventricular stratum of r9Ve	6/301	0.84831	0.999962	0	0	0.70549	0.11606	VAT1;IGFBP3;HMGA1;PLIN2;A2M;YWHAZ
posterior (ventral) nucleus	6/301	0.84831	0.999962	0	0	0.70549	0.11606	RIMS3;RGS16;TNC;L1CAM;NR3C1;IER3
posterior tegmental nucleus	6/301	0.84831	0.999962	0	0	0.70549	0.11606	CSTB;YWHAQ;SDC2;PNOC;AMPD3;AP2M1
posterodorsal tegmental nucleus	6/301	0.84831	0.999962	0	0	0.70549	0.11606	SYT4;TTR;HNRNPA2B1;IGFBP2;TXNIP;YBX1
posterolateral cortical amygdaloid area	6/301	0.84831	0.999962	0	0	0.70549	0.11606	MARCKSL1;TRIM28;RPS7;PKIA;PLIN2;PRPH
prerubral area	6/301	0.84831	0.999962	0	0	0.70549	0.11606	YWHAQ;RPS8;SDC2;EBF3;LSS;VAMP2
pretectal tegmentum	6/301	0.84831	0.999962	0	0	0.70549	0.11606	IFITM3;SDC2;SNCG;EBF3;CXCL13;LSS
prethalamic (p3) zona limitans domain	6/301	0.84831	0.999962	0	0	0.70549	0.11606	RAB31;GPX1;RGS16;PNOC;NR2F1;LSS
principal pretectal nucleus	6/301	0.84831	0.999962	0	0	0.70549	0.11606	PKIA;ISLR2;RPL27;CD14;PGM2L1;PRRC2A
r1 part of lateral pontine nuclei	6/301	0.84831	0.999962	0	0	0.70549	0.11606	GRN;RGS1;NRG4;LAPTM5;RPS13;SMARCA4
r1 part of ventral parvicellular reticular formation	6/301	0.84831	0.999962	0	0	0.70549	0.11606	LGALS1;RPS18;RPS20;RPL37;LCP1;MMP9
r1 part of vestibular sensory column	6/301	0.84831	0.999962	0	0	0.70549	0.11606	LGALS1;TTR;SPP1;INHBA;NEUROG2;WLS
r10 alar plate	6/301	0.84831	0.999962	0	0	0.70549	0.11606	LGALS1;MSN;TAGLN2;PLIN2;A2M;YWHAZ
r10 part of external cuneate nucleus	6/301	0.84831	0.999962	0	0	0.70549	0.11606	VAT1;IGFBP3;PLIN2;PFN1;A2M;YWHAZ
r2 part of cochlear sensory column	6/301	0.84831	0.999962	0	0	0.70549	0.11606	BTG1;RGS1;IGFBP2;ZIC1;LCP1;ZFP36L1
r3 part of spinal trigeminal sensory column, oral part	6/301	0.84831	0.999962	0	0	0.70549	0.11606	ACAP3;YWHAQ;HNRNPA2B1;TXNIP;EBF3;LSS
r4 part of reticulotegmental nucleus, shell portion	6/301	0.84831	0.999962	0	0	0.70549	0.11606	APC2;GRN;STXBP1;ATP5A1;SPP1;ZMPSTE24
r6 part of nucleus prepositus	6/301	0.84831	0.999962	0	0	0.70549	0.11606	CSTB;SYT4;TTR;IGFBP3;SNCG;LAMB1
r7 part of the dorsal cochlear nucleus	6/301	0.84831	0.999962	0	0	0.70549	0.11606	FADS2;MMP14;CD82;CCL20;LCP1;WLS
r8 part of parvocellular medial vestibular nucleus	6/301	0.84831	0.999962	0	0	0.70549	0.11606	IGFBP3;TNC;S100A6;PLIN2;A2M;YWHAZ
r9 part of nucleus of Roller	6/301	0.84831	0.999962	0	0	0.70549	0.11606	TOP2A;ACLY;LGALS1;GDF15;TXNIP;S100A10
r9 part of parvocellular medial vestibular nucleus	6/301	0.84831	0.999962	0	0	0.70549	0.11606	VAT1;IGFBP3;HMGA1;PLIN2;A2M;YWHAZ
red nucleus, parvicellular part	6/301	0.84831	0.999962	0	0	0.70549	0.11606	IFITM3;SLC38A1;YWHAQ;SDC2;SNCG;LSS
rostral periolivary nucleus	6/301	0.84831	0.999962	0	0	0.70549	0.11606	SLC38A1;YWHAQ;NRG4;PABPC4;HSPG2;RPS13
secondary prosencephalon	6/301	0.84831	0.999962	0	0	0.70549	0.11606	MEF2C;ENC1;DCX;CELF5;INHBA;DUSP6
sublayer 6a of InsCx	6/301	0.84831	0.999962	0	0	0.70549	0.11606	TMEFF1;ACAP3;FASN;RPS20;ACTN4;IER3
subpallium	6/301	0.84831	0.999962	0	0	0.70549	0.11606	CAP1;RGS2;ALCAM;SERPINE2;TTYH1;COL6A1
substantia nigra compacta, isthmic part	6/301	0.84831	0.999962	0	0	0.70549	0.11606	VAT1;YWHAQ;SDC2;CRABP1;SNCG;LSS
substantia nigra reticulata, m1 part	6/301	0.84831	0.999962	0	0	0.70549	0.11606	IFITM3;RGS1;NRG4;PABPC4;MMP9;RPS13
superficial stratum of CCx (cortical plate/marginal zone)	6/301	0.84831	0.999962	0	0	0.70549	0.11606	TMEFF1;GRIK3;MYO5A;HMGCR;DUSP6;SEPT3
superficial stratum of Hb	6/301	0.84831	0.999962	0	0	0.70549	0.11606	CD63;FADS2;GPX1;SCRN1;ITGB2;VIM
superficial stratum of PO1	6/301	0.84831	0.999962	0	0	0.70549	0.11606	FCER1G;NRG4;PEG10;S100A4;UBA1;CXCL13
superficial stratum of PO2	6/301	0.84831	0.999962	0	0	0.70549	0.11606	DLX1;RGS1;PEG10;RGS16;UBA1;CXCL13
superficial stratum of PSPa	6/301	0.84831	0.999962	0	0	0.70549	0.11606	VAT1;SYT4;GRN;PEG10;TMBIM6;RPS21
superficial stratum of PcPL	6/301	0.84831	0.999962	0	0	0.70549	0.11606	NGRN;RPL18A;RGS16;PEA15;LAPTM5;TNC
superficial stratum of PrS (cortical plate/marginal zone)	6/301	0.84831	0.999962	0	0	0.70549	0.11606	TMEFF1;HNRNPK;CHL1;RPL22;NR3C1;TRIB2
superficial stratum of RtC	6/301	0.84831	0.999962	0	0	0.70549	0.11606	GPX1;CD82;YWHAQ;CRABP1;MSN;LSS
superficial stratum of THyB-I	6/301	0.84831	0.999962	0	0	0.70549	0.11606	VAT1;DLX1;TRIM28;PABPC4;RPL12;CXCL13
superficial stratum of m1AD	6/301	0.84831	0.999962	0	0	0.70549	0.11606	CCND1;RPS8;RPL37A;CTNNB1;SNCG;RPS24
superficial stratum of p1B	6/301	0.84831	0.999962	0	0	0.70549	0.11606	GRN;SDC2;PABPC4;TIMP1;VIM;CXCL13
superficial stratum of r10Ve	6/301	0.84831	0.999962	0	0	0.70549	0.11606	VAT1;IGFBP3;PLIN2;PFN1;A2M;YWHAZ
superficial stratum of r1BI	6/301	0.84831	0.999962	0	0	0.70549	0.11606	GRN;RGS1;NRG4;LAPTM5;RPS13;SMARCA4
superficial stratum of r3Tr	6/301	0.84831	0.999962	0	0	0.70549	0.11606	ACAP3;YWHAQ;HNRNPA2B1;TXNIP;EBF3;LSS
superficial stratum of r5BL	6/301	0.84831	0.999962	0	0	0.70549	0.11606	LGALS1;NRG4;PABPC4;RPL12;HLA-A;RPS13
superficial stratum of the Fc	6/301	0.84831	0.999962	0	0	0.70549	0.11606	IFITM3;MMP14;IL1B;ITGB2;CD14;LSS
telencephalic vesicle	6/301	0.84831	0.999962	0	0	0.70549	0.11606	MEF2C;ENC1;DCX;CELF5;INHBA;DUSP6
terminal paraventricular area of THyA	6/301	0.84831	0.999962	0	0	0.70549	0.11606	PEG10;RGS16;NNAT;FXYD6;CXCL13;RPS21
terminal subparaventricular area of THyA	6/301	0.84831	0.999962	0	0	0.70549	0.11606	IFITM3;PEG10;CRABP1;TXNIP;CXCL13;GNAI2
thalamic tegmentum	6/301	0.84831	0.999962	0	0	0.70549	0.11606	SDC2;RGS16;EBF3;TMBIM6;LSS;VAMP2
ventral entopeduncular nucleus	6/301	0.84831	0.999962	0	0	0.70549	0.11606	VAT1;SYT4;GRN;PEG10;TMBIM6;RPS21
ventral paracommissural tectal nucleus, m1 part	6/301	0.84831	0.999962	0	0	0.70549	0.11606	FADS2;CCND1;RPL27A;PKIA;RPL37A;SNCG
ventral posterolateral nucleus	6/301	0.84831	0.999962	0	0	0.70549	0.11606	RAB31;GPX1;RGS16;NR2F1;SAT1;CLASP2
ventrolateral part of alar m1	6/301	0.84831	0.999962	0	0	0.70549	0.11606	CSTB;PEG10;SNCG;EBF3;MAPT;PRDX6
zonal layer of SC	6/301	0.84831	0.999962	0	0	0.70549	0.11606	IFITM3;MMP14;GDF15;S100A6;UBA1;SMARCA4
Field CA1	7/344	0.848386	0.999962	0	0	0.720217	0.118418	YWHAB;FOXG1;PLXNA1;CELF5;CRMP1;PFN1;DUSP6
Olivary pretectal nucleus	11/514	0.852829	0.999962	0	0	0.757172	0.120539	IFITM3;RPL18A;PKIA;UBN2;IGFBP3;TXNIP;ISLR2;RPL27;VIM;XPR1;PRRC2A
Ventral tegmental nucleus	8/391	0.857046	0.999962	0	0	0.723817	0.111659	SOX2;CSTB;TUBA1A;ATCAY;NCAM1;AMPD3;FDFT1;RPS12
Field CA3, stratum oriens	7/349	0.85834	0.999962	0	0	0.709502	0.10838	FOXG1;IGFBP3;IGFBP2;LAPTM5;ISLR2;PLXNA1;PFN1
Accessory olfactory bulb	7/379	0.907417	0.999962	0	0	0.65126	0.0632721	IL1RN;RAB31;IL1B;DCX;INHBA;SOX4;SMARCA4
mantle zone of DG	12/599	0.911046	0.999962	0	0	0.705955	0.0657683	RGS2;GPX1;RPS7;PKIA;PABPC4;RPL22;CRABP1;RPLP0;ISLR2;FAU;PFN1;XPR1
Tuberal nucleus	8/427	0.912106	0.999962	0	0	0.660378	0.0607544	IFITM3;VAT1;DLX1;PCSK1N;TRIM28;PEG10;CRABP1;CXCL13
Field CA1, stratum lacunosum-moleculare	7/383	0.912714	0.999962	0	0	0.644196	0.0588363	FOXG1;LAPTM5;ISLR2;PLXNA1;CELF5;CRMP1;PFN1
Fasciola cinerea	8/435	0.92153	0.999962	0	0	0.647733	0.0529328	IFITM3;FADS2;MMP14;CD82;IL1B;ITGB2;CD14;LSS
Field CA1, stratum radiatum	6/345	0.92208	0.999962	0	0	0.612511	0.0496887	FOXG1;PLXNA1;CELF5;CRMP1;PFN1;DUSP6
AOB, mitral cell layer	5/301	0.925386	0.999962	0	0	0.584832	0.0453506	IL1RN;IL1B;DCX;INHBA;SOX4
AOB, outer plexiform layer	5/301	0.925386	0.999962	0	0	0.584832	0.0453506	IL1RN;IL1B;DCX;INHBA;SOX4
Accessory olfactory bulb, mitral layer	5/301	0.925386	0.999962	0	0	0.584832	0.0453506	IL1RN;IL1B;DCX;INHBA;SOX4
Agranular insular area, dorsal part, layer 1	5/301	0.925386	0.999962	0	0	0.584832	0.0453506	ACTR2;LAPTM5;SH3BGRL3;TREM2;TRIB2
Agranular insular area, posterior part, layer 6a	5/301	0.925386	0.999962	0	0	0.584832	0.0453506	GNAO1;GNG2;PLAUR;ISLR2;FDFT1
Anterior cingulate area, ventral part, layer 1	5/301	0.925386	0.999962	0	0	0.584832	0.0453506	SQLE;S100A6;KIF21B;DUSP6;NEUROG2
Anterior cingulate area, ventral part, layer 5	5/301	0.925386	0.999962	0	0	0.584832	0.0453506	SQLE;GRIK3;FLNA;DUSP6;SREBF2
Anterior olfactory nucleus, lateral part	5/301	0.925386	0.999962	0	0	0.584832	0.0453506	IL1RN;GDF15;DCX;INHBA;SOX4
Anterolateral visual area	5/301	0.925386	0.999962	0	0	0.584832	0.0453506	PLAUR;HMGCR;SYT13;NR3C1;DUSP6
Anterolateral visual area, layer 2/3	5/301	0.925386	0.999962	0	0	0.584832	0.0453506	CCL20;PLAUR;TNRC18;HMGCR;DUSP6
Anterolateral visual area, layer 6a	5/301	0.925386	0.999962	0	0	0.584832	0.0453506	YWHAB;PLAUR;HMGCR;SYT13;NR3C1
Anteromedial visual area, layer 2/3	5/301	0.925386	0.999962	0	0	0.584832	0.0453506	CDKN1A;ENC1;TNRC18;INHBA;DUSP6
Auditory areas	5/301	0.925386	0.999962	0	0	0.584832	0.0453506	IFITM3;YWHAB;FTH1;PPT1;IER3
Basolateral amygdalar nucleus, anterior part	5/301	0.925386	0.999962	0	0	0.584832	0.0453506	GNG2;NR2F1;TNC;PLAUR;AP2M1
Basolateral amygdalar nucleus, ventral part	5/301	0.925386	0.999962	0	0	0.584832	0.0453506	MARCKSL1;NR2F1;PLAUR;PLIN2;AP2M1
Cortical amygdalar area	5/301	0.925386	0.999962	0	0	0.584832	0.0453506	MARCKSL1;TRIM28;PKIA;NR2F1;AP2M1
Cortical amygdalar area, posterior part, lateral zone, layer 2	5/301	0.925386	0.999962	0	0	0.584832	0.0453506	MARCKSL1;TRIM28;CHL1;PKIA;PRPH
Cortical amygdalar area, posterior part, medial zone, layer 2	5/301	0.925386	0.999962	0	0	0.584832	0.0453506	MARCKSL1;TRIM28;PKIA;CDH13;PGM2L1
Cortical subplate	5/301	0.925386	0.999962	0	0	0.584832	0.0453506	GNAO1;GNG2;NR2F1;HMGCR;PRPH
Dentate gyrus, molecular layer	5/301	0.925386	0.999962	0	0	0.584832	0.0453506	YWHAB;PKIA;RPL22;ISLR2;XPR1
Diagonal band nucleus	5/301	0.925386	0.999962	0	0	0.584832	0.0453506	ALCAM;PABPC4;IL1B;TXNIP;UBA1
Endopiriform nucleus, ventral part	5/301	0.925386	0.999962	0	0	0.584832	0.0453506	DNAJA1;PLAUR;LCP1;AP2M1;PRPH
Entorhinal area, lateral part, layer 6a	5/301	0.925386	0.999962	0	0	0.584832	0.0453506	DNAJA1;CDH2;PLIN2;LCP1;FDFT1
Entorhinal area, medial part, dorsal zone, layer 3	5/301	0.925386	0.999962	0	0	0.584832	0.0453506	TMEFF1;CDH2;PLIN2;PTN;FDFT1
Entorhinal area, medial part, dorsal zone, layer 4	5/301	0.925386	0.999962	0	0	0.584832	0.0453506	DNAJA1;CDH2;TRIB2;VAMP2;FDFT1
Entorhinal area, medial part, dorsal zone, layer 5	5/301	0.925386	0.999962	0	0	0.584832	0.0453506	TMEFF1;CDH2;CPE;TRIB2;PRPH
Entorhinal area, medial part, dorsal zone, layer 6	5/301	0.925386	0.999962	0	0	0.584832	0.0453506	CDH2;CPE;NR3C1;TRIB2;FDFT1
Entorhinal area, medial part, ventral zone, layer 1	5/301	0.925386	0.999962	0	0	0.584832	0.0453506	SYT4;TRIM28;FOXG1;PKIA;CXCL13
External cuneate nucleus	5/301	0.925386	0.999962	0	0	0.584832	0.0453506	IL1B;UBN2;IGFBP3;VIM;A2M
Field CA2, pyramidal layer	5/301	0.925386	0.999962	0	0	0.584832	0.0453506	MMP14;FOXG1;ITGB2;PLXNA1;PFN1
Globus pallidus, internal segment	5/301	0.925386	0.999962	0	0	0.584832	0.0453506	RAB31;GPX1;YWHAQ;CCL20;PABPC4
Gracile nucleus	5/301	0.925386	0.999962	0	0	0.584832	0.0453506	IGFBP3;TNC;PLIN2;A2M;LSS
Gustatory areas	5/301	0.925386	0.999962	0	0	0.584832	0.0453506	ACTR2;TYROBP;PLAUR;ACTN4;PRPH
Infralimbic area, layer 2/3	5/301	0.925386	0.999962	0	0	0.584832	0.0453506	FCER1G;CRABP1;S100A6;SOX11;NEUROG2
Infralimbic area, layer 5	5/301	0.925386	0.999962	0	0	0.584832	0.0453506	CDKN1A;CRABP1;GRIK3;S100A6;DUSP6
Isocortex	5/301	0.925386	0.999962	0	0	0.584832	0.0453506	MEF2C;ENC1;KIF21B;HMGCR;DUSP6
Lateral terminal nucleus of the accessory optic tract	5/301	0.925386	0.999962	0	0	0.584832	0.0453506	YWHAQ;CCL20;FOXG1;RPL11;DCX
Magnocellular nucleus	5/301	0.925386	0.999962	0	0	0.584832	0.0453506	RPL18A;PABPC4;STMN3;CXCL13;AP2M1
Medial amygdalar nucleus, posteroventral part	5/301	0.925386	0.999962	0	0	0.584832	0.0453506	MARCKSL1;IL1B;PEA15;LAPTM5;HDGF
Medial geniculate complex	5/301	0.925386	0.999962	0	0	0.584832	0.0453506	RPL18A;PKIA;RGS16;RPL11;FGFBP3
Medial geniculate complex, ventral part	5/301	0.925386	0.999962	0	0	0.584832	0.0453506	RPL18A;PKIA;RGS16;RPL11;FGFBP3
Mediodorsal nucleus of the thalamus, central part	5/301	0.925386	0.999962	0	0	0.584832	0.0453506	RAB3C;RIMS3;RGS16;CTNNB1;L1CAM
Mediodorsal nucleus of the thalamus, lateral part	5/301	0.925386	0.999962	0	0	0.584832	0.0453506	RAB3C;RIMS3;RGS16;CTNNB1;L1CAM
Nucleus of the lateral lemniscus, horizontal part	5/301	0.925386	0.999962	0	0	0.584832	0.0453506	SYT4;IL1RN;IGFBP3;PLIN2;CD14
Nucleus of the optic tract	5/301	0.925386	0.999962	0	0	0.584832	0.0453506	RPL18A;PKIA;LAPTM5;ISLR2;GLTSCR2
Nucleus of the solitary tract, gelatinous part	5/301	0.925386	0.999962	0	0	0.584832	0.0453506	GDF15;IGFBP3;TAGLN2;PLIN2;A2M
Nucleus of the solitary tract, medial part	5/301	0.925386	0.999962	0	0	0.584832	0.0453506	APC2;RPL12;SOX11;TAGLN2;PLIN2
Orbital area	5/301	0.925386	0.999962	0	0	0.584832	0.0453506	IL1RN;FCER1G;CRABP1;S100A6;NEUROG2
Orbital area, lateral part, layer 1	5/301	0.925386	0.999962	0	0	0.584832	0.0453506	IL1RN;GDF15;IL1B;LAPTM5;NEUROG2
Orbital area, ventrolateral part, layer 1	5/301	0.925386	0.999962	0	0	0.584832	0.0453506	IL1RN;GDF15;CRABP1;SOX4;NEUROG2
Paraflocculus, granular layer	5/301	0.925386	0.999962	0	0	0.584832	0.0453506	BTG1;LCP1;TKT;ZMPSTE24;ZFP36L1
Paragigantocellular reticular nucleus	5/301	0.925386	0.999962	0	0	0.584832	0.0453506	TOP2A;TRIM28;NRG4;HLA-A;S100A10
Piriform area	5/301	0.925386	0.999962	0	0	0.584832	0.0453506	ACTR2;TYROBP;PTN;HMGCR;PRPH
Piriform area, polymorph layer	5/301	0.925386	0.999962	0	0	0.584832	0.0453506	ACTR2;TYROBP;PTN;HMGCR;PRPH
Piriform area, pyramidal layer	5/301	0.925386	0.999962	0	0	0.584832	0.0453506	ACTR2;TYROBP;PTN;HMGCR;PRPH
Piriform-amygdalar area	5/301	0.925386	0.999962	0	0	0.584832	0.0453506	MARCKSL1;TYROBP;TRIM28;PKIA;PLIN2
Pontine central gray	5/301	0.925386	0.999962	0	0	0.584832	0.0453506	CD164;SYT4;CD82;IGFBP2;SNCG
Posterior parietal association areas	5/301	0.925386	0.999962	0	0	0.584832	0.0453506	CDKN1A;TNRC18;HMGCR;HSPG2;DUSP6
Posterior parietal association areas, layer 1	5/301	0.925386	0.999962	0	0	0.584832	0.0453506	CDKN1A;ENC1;UBA1;CD14;DUSP6
Posterolateral visual area, layer 2/3	5/301	0.925386	0.999962	0	0	0.584832	0.0453506	LASP1;PLAUR;PTN;DCLK1;DUSP6
Posterolateral visual area, layer 4	5/301	0.925386	0.999962	0	0	0.584832	0.0453506	LASP1;PLAUR;PTN;HMGCR;DUSP6
Postpiriform transition area, layers 1	5/301	0.925386	0.999962	0	0	0.584832	0.0453506	RPS7;PKIA;NR2F1;PLAUR;FDFT1
Postsubiculum	5/301	0.925386	0.999962	0	0	0.584832	0.0453506	IFITM3;GDF15;S100A6;UBA1;TRIB2
Postsubiculum, layer 1	5/301	0.925386	0.999962	0	0	0.584832	0.0453506	IFITM3;FCER1G;GDF15;S100A6;UBA1
Primary somatosensory area, barrel field	5/301	0.925386	0.999962	0	0	0.584832	0.0453506	LASP1;LRP1;PPT1;PLAUR;PTN
Primary somatosensory area, barrel field, layer 4	5/301	0.925386	0.999962	0	0	0.584832	0.0453506	LASP1;LRP1;TNRC18;PTN;B2M
Primary somatosensory area, barrel field, layer 6a	5/301	0.925386	0.999962	0	0	0.584832	0.0453506	LASP1;LRP1;KIF5C;PPT1;PLAUR
Primary somatosensory area, lower limb, layer 4	5/301	0.925386	0.999962	0	0	0.584832	0.0453506	CCL20;FOXG1;RPL27;TNRC18;HMGCR
Primary somatosensory area, lower limb, layer 5	5/301	0.925386	0.999962	0	0	0.584832	0.0453506	SPAG9;NGRN;SH3BGRL3;PTN;HMGCR
Primary somatosensory area, nose, layer 6a	5/301	0.925386	0.999962	0	0	0.584832	0.0453506	LASP1;TYROBP;PPT1;PLAUR;ACTN4
Primary somatosensory area, trunk	5/301	0.925386	0.999962	0	0	0.584832	0.0453506	WDR82;ENC1;TNRC18;HMGCR;DUSP6
Primary somatosensory area, trunk, layer 4	5/301	0.925386	0.999962	0	0	0.584832	0.0453506	CCL20;ENC1;DCX;TNRC18;PTN
Primary somatosensory area, trunk, layer 5	5/301	0.925386	0.999962	0	0	0.584832	0.0453506	SPAG9;LASP1;LRP1;TNRC18;PTN
Pyramus (VIII)	5/301	0.925386	0.999962	0	0	0.584832	0.0453506	BTG1;PTPRZ1;ZIC1;VIM;A2M
Pyramus (VIII), granular layer	5/301	0.925386	0.999962	0	0	0.584832	0.0453506	BTG1;PTPRZ1;ZIC1;VIM;A2M
Retrochiasmatic area	5/301	0.925386	0.999962	0	0	0.584832	0.0453506	IFITM3;TRIM28;PEG10;CRABP1;CXCL13
Retrosplenial area, lateral agranular part, layer 2/3	5/301	0.925386	0.999962	0	0	0.584832	0.0453506	CDKN1A;TRIM28;TNRC18;DUSP6;SMARCA4
Secondary motor area, layer 5	5/301	0.925386	0.999962	0	0	0.584832	0.0453506	TMEFF1;TYROBP;KIF5C;SH3BGRL3;PTN
Secondary motor area, layer 6a	5/301	0.925386	0.999962	0	0	0.584832	0.0453506	TMEFF1;TYROBP;SCRN1;MYO5A;SH3BGRL3
Septohippocampal nucleus	5/301	0.925386	0.999962	0	0	0.584832	0.0453506	SOX2;SYT4;RGS2;PNOC;ZIC1
Subiculum, dorsal part	5/301	0.925386	0.999962	0	0	0.584832	0.0453506	TMEFF1;CD14;PFN1;NR3C1;DUSP6
Subiculum, dorsal part, stratum radiatum	5/301	0.925386	0.999962	0	0	0.584832	0.0453506	TMEFF1;ITGB2;CD14;PFN1;LSS
Subiculum, ventral part, molecular layer	5/301	0.925386	0.999962	0	0	0.584832	0.0453506	GNG2;RPS7;CHL1;FOXG1;RPL22
Submedial nucleus of the thalamus	5/301	0.925386	0.999962	0	0	0.584832	0.0453506	RAB3C;RIMS3;RGS16;L1CAM;AGRN
Superior colliculus, motor related, deep gray layer	5/301	0.925386	0.999962	0	0	0.584832	0.0453506	RPS8;STXBP1;RPL13;SNCG;AGRN
Superior olivary complex	5/301	0.925386	0.999962	0	0	0.584832	0.0453506	LGALS1;NRG4;SPP1;HLA-A;RPS13
Supplemental somatosensory area, layer 6a	5/301	0.925386	0.999962	0	0	0.584832	0.0453506	GNG2;PPT1;PLAUR;IER3;FDFT1
Taenia tecta, dorsal part, layer 1	5/301	0.925386	0.999962	0	0	0.584832	0.0453506	FCER1G;GDF15;CRABP1;S100A4;NEUROG2
Taenia tecta, dorsal part, layer 2	5/301	0.925386	0.999962	0	0	0.584832	0.0453506	TMEFF1;FCER1G;GDF15;CRABP1;NEUROG2
Taenia tecta, dorsal part, layer 3	5/301	0.925386	0.999962	0	0	0.584832	0.0453506	TOP2A;FLNA;CDH13;PTN;VAMP2
Taenia tecta, ventral part	5/301	0.925386	0.999962	0	0	0.584832	0.0453506	FCER1G;GDF15;FTH1;INHBA;NEUROG2
Taenia tecta, ventral part, layer 1	5/301	0.925386	0.999962	0	0	0.584832	0.0453506	FCER1G;GDF15;FTH1;INHBA;NEUROG2
Taenia tecta, ventral part, layer 3	5/301	0.925386	0.999962	0	0	0.584832	0.0453506	TMEFF1;ACTR2;PTN;YBX1;VAMP2
Temporal association areas, layer 6a	5/301	0.925386	0.999962	0	0	0.584832	0.0453506	GNG2;YWHAB;PLAUR;PLIN2;NR3C1
Thalamus, sensory-motor cortex related	5/301	0.925386	0.999962	0	0	0.584832	0.0453506	RIMS3;RGS16;NR2F1;MYO5A;L1CAM
Ventral posteromedial nucleus of the thalamus	5/301	0.925386	0.999962	0	0	0.584832	0.0453506	RGS16;NR2F1;MYO5A;L1CAM;CLASP2
Ventral posteromedial nucleus of the thalamus, parvicellular part	5/301	0.925386	0.999962	0	0	0.584832	0.0453506	YWHAQ;IL1B;RGS16;L1CAM;LSS
Ventral tegmental area	5/301	0.925386	0.999962	0	0	0.584832	0.0453506	IFITM3;SDC2;SNCG;EBF3;FDFT1
Visceral area	5/301	0.925386	0.999962	0	0	0.584832	0.0453506	LASP1;PPT1;PLAUR;IER3;FDFT1
Visceral area, layer 6a	5/301	0.925386	0.999962	0	0	0.584832	0.0453506	GNG2;PPT1;PLAUR;IER3;FDFT1
accessory entopeduncular nucleus (post-migratory)	5/301	0.925386	0.999962	0	0	0.584832	0.0453506	GNG2;YWHAQ;DCLK1;VAMP2;ATP9A
alar plate of p2 (alar thalamus)	5/301	0.925386	0.999962	0	0	0.584832	0.0453506	RIMS3;RGS16;ZIC1;CTNNB1;L1CAM
amygdalohippocampal area	5/301	0.925386	0.999962	0	0	0.584832	0.0453506	MARCKSL1;PEA15;NR2F1;CDH13;HDGF
anterior pretectal nucleus, ventral core part	5/301	0.925386	0.999962	0	0	0.584832	0.0453506	RIMS3;RGS16;KIF5A;TNC;RPL24
anteroventral part of alar thalamus	5/301	0.925386	0.999962	0	0	0.584832	0.0453506	RAB3C;RIMS3;RGS16;L1CAM;LSS
basal plate of m1	5/301	0.925386	0.999962	0	0	0.584832	0.0453506	ACLY;SDC2;SPP1;SNCG;CXCL13
basal plate of p2	5/301	0.925386	0.999962	0	0	0.584832	0.0453506	SDC2;EBF3;TMBIM6;LSS;VAMP2
basal reticular formation of p1	5/301	0.925386	0.999962	0	0	0.584832	0.0453506	SDC2;PNOC;EBF3;LSS;SMARCA4
basointermediate isthmic reticular formation	5/301	0.925386	0.999962	0	0	0.584832	0.0453506	FTH1;RPL12;PNOC;SNCG;CXCL13
basolateral amygdaloid nucleus, anterior part	5/301	0.925386	0.999962	0	0	0.584832	0.0453506	DNAJA1;NR2F1;TNC;PLAUR;AP2M1
caudal linear (raphe) nucleus	5/301	0.925386	0.999962	0	0	0.584832	0.0453506	FTH1;SDC2;PNOC;CXCL13;YWHAZ
central part of MD	5/301	0.925386	0.999962	0	0	0.584832	0.0453506	RAB3C;RIMS3;DPYSL5;RGS16;L1CAM
central subpallium (classic basal ganglia)	5/301	0.925386	0.999962	0	0	0.584832	0.0453506	CAP1;RGS2;SERPINE2;TTYH1;ATP2B1
colliculus superior	5/301	0.925386	0.999962	0	0	0.584832	0.0453506	GDF15;S100A6;RPL27;NEUROG2;SMARCA4
deep white layer of SC	5/301	0.925386	0.999962	0	0	0.584832	0.0453506	RPS8;STXBP1;TTC3;PLXNA1;SNCG
dorsal periolivary nucleus	5/301	0.925386	0.999962	0	0	0.584832	0.0453506	LGALS1;YWHAQ;SPP1;HLA-A;LCP1
dorsal spiriform nucleus	5/301	0.925386	0.999962	0	0	0.584832	0.0453506	IFITM3;FADS2;SDC2;FABP7;PRDX6
dorsolateral (non-cerebellar) part of isA	5/301	0.925386	0.999962	0	0	0.584832	0.0453506	RPS18;TNC;EBF3;RPS20;NCAM1
dorsolateral SC part of the periaqueductal gray	5/301	0.925386	0.999962	0	0	0.584832	0.0453506	RPS8;STXBP1;HMGA1;PLXNA1;SNCG
dorsolateral part of Lat	5/301	0.925386	0.999962	0	0	0.584832	0.0453506	CADM3;BTG1;ZIC1;RBMX;ZFP36L1
dorsolateral preisthmic part of periaqueductal gray	5/301	0.925386	0.999962	0	0	0.584832	0.0453506	FADS2;SERPINE2;RPS18;SNCG;EBF3
external part of AOV	5/301	0.925386	0.999962	0	0	0.584832	0.0453506	DLX1;IL1RN;DCX;INHBA;SOX4
frontal cortex	5/301	0.925386	0.999962	0	0	0.584832	0.0453506	TMEFF1;ACAP3;IL1RN;TYROBP;SH3BGRL3
intermediate gray layer of SC	5/301	0.925386	0.999962	0	0	0.584832	0.0453506	S100A6;CTNNB1;RPL27;NEUROG2;SMARCA4
intermediate part of r1B	5/301	0.925386	0.999962	0	0	0.584832	0.0453506	CSTB;RPL12;PLXNA1;SNCG;LSS
intermediate pretectal nucleus	5/301	0.925386	0.999962	0	0	0.584832	0.0453506	CTNNB1;RPL27;FGFBP3;YWHAG;MAP4K4
intermediate stratum of AOB	5/301	0.925386	0.999962	0	0	0.584832	0.0453506	IL1RN;IL1B;DCX;INHBA;SOX4
intermediate stratum of CoPL	5/301	0.925386	0.999962	0	0	0.584832	0.0453506	LAPTM5;TNC;RPL24;RPL27;YWHAG
intermediate stratum of DTTh	5/301	0.925386	0.999962	0	0	0.584832	0.0453506	RIMS3;RGS16;ZIC1;CTNNB1;L1CAM
intermediate stratum of PO2	5/301	0.925386	0.999962	0	0	0.584832	0.0453506	VAT1;PEG10;STMN3;CXCL13;RPS13
intermediate stratum of Pal	5/301	0.925386	0.999962	0	0	0.584832	0.0453506	RGS2;GPX1;TTYH1;CRABP1;COL6A1
intermediate stratum of PcPV	5/301	0.925386	0.999962	0	0	0.584832	0.0453506	RIMS3;RGS16;KIF5A;TNC;RPL24
intermediate stratum of RMa	5/301	0.925386	0.999962	0	0	0.584832	0.0453506	IFITM3;IL1RN;RGS1;CXCL13;RPS13
intermediate stratum of Str	5/301	0.925386	0.999962	0	0	0.584832	0.0453506	CAP1;RGS2;SERPINE2;SCRN1;ATP2B1
intermediate stratum of isBI	5/301	0.925386	0.999962	0	0	0.584832	0.0453506	FTH1;RPL12;PNOC;SNCG;CXCL13
intermediate stratum of p1B	5/301	0.925386	0.999962	0	0	0.584832	0.0453506	IFITM3;SDC2;SNCG;EBF3;LSS
intermediate stratum of r10BI	5/301	0.925386	0.999962	0	0	0.584832	0.0453506	TOP2A;LGALS1;HMGA1;S100A4;YWHAZ
intermediate stratum of r10BL	5/301	0.925386	0.999962	0	0	0.584832	0.0453506	TOP2A;NRG4;HMGA1;S100A4;YWHAZ
intermediate stratum of r1BI	5/301	0.925386	0.999962	0	0	0.584832	0.0453506	CSTB;RPL12;PLXNA1;SNCG;LSS
intermediate stratum of r1Ve	5/301	0.925386	0.999962	0	0	0.584832	0.0453506	LGALS1;SPP1;INHBA;NEUROG2;WLS
intermediate stratum of r2BL	5/301	0.925386	0.999962	0	0	0.584832	0.0453506	VAT1;SPP1;SNCG;AGRN;S100A10
intermediate stratum of r2BM	5/301	0.925386	0.999962	0	0	0.584832	0.0453506	CSTB;SPP1;HMGA1;AMPD3;AP2M1
intermediate stratum of r9Ve	5/301	0.925386	0.999962	0	0	0.584832	0.0453506	CD82;IL1B;IGFBP3;EBF3;UBA1
lateral (parvicellular) part of MD	5/301	0.925386	0.999962	0	0	0.584832	0.0453506	RAB3C;RIMS3;RGS16;CTNNB1;L1CAM
lateral pallium	5/301	0.925386	0.999962	0	0	0.584832	0.0453506	IL1RN;TYROBP;CRABP1;PLAUR;DCX
lateral part of PcP	5/301	0.925386	0.999962	0	0	0.584832	0.0453506	NGRN;RIMS3;RGS16;LAPTM5;TNC
lateral part of r10B	5/301	0.925386	0.999962	0	0	0.584832	0.0453506	TOP2A;NRG4;HMGA1;S100A4;YWHAZ
lateral part of r5B	5/301	0.925386	0.999962	0	0	0.584832	0.0453506	LGALS1;NRG4;PABPC4;RPL12;SPP1
lateral periretromammillary nucleus	5/301	0.925386	0.999962	0	0	0.584832	0.0453506	RGS1;PABPC4;RPL12;CXCL13;RPS13
lateral preoptic nucleus, PO2 part	5/301	0.925386	0.999962	0	0	0.584832	0.0453506	VAT1;PEG10;STMN3;CXCL13;RPS13
lateral terminal nucleus of the accessory optic tract, lateral part	5/301	0.925386	0.999962	0	0	0.584832	0.0453506	SPARC;RPL18A;GDF15;PKIA;LAPTM5
lateropallial amygdalopiriform area	5/301	0.925386	0.999962	0	0	0.584832	0.0453506	MARCKSL1;YWHAB;NR2F1;LCP1;PRPH
layer 1 of PCx	5/301	0.925386	0.999962	0	0	0.584832	0.0453506	TRIM28;ENC1;CELF5;TREM2;DUSP6
layer 1 of VPrP cortex	5/301	0.925386	0.999962	0	0	0.584832	0.0453506	TYROBP;RGS1;PTN;HMGCR;AP2M1
layer 2 of PrS	5/301	0.925386	0.999962	0	0	0.584832	0.0453506	HNRNPK;CHL1;PKIA;B2M;TRIB2
layer 3 of CCx	5/301	0.925386	0.999962	0	0	0.584832	0.0453506	MEF2C;PLXNA1;TNRC18;HMGCR;DUSP6
layer 3 of PrS	5/301	0.925386	0.999962	0	0	0.584832	0.0453506	TMEFF1;HNRNPK;CHL1;NR3C1;TRIB2
layer 4 of FCx	5/301	0.925386	0.999962	0	0	0.584832	0.0453506	ACAP3;TYROBP;TRIM2;SH3BGRL3;PTN
layer 4 of PRh-Ect	5/301	0.925386	0.999962	0	0	0.584832	0.0453506	DNAJA1;MYL6;PLAUR;HMGCR;SYT13
layer 4 of PaS	5/301	0.925386	0.999962	0	0	0.584832	0.0453506	CDH2;PLAUR;NR3C1;TRIB2;VAMP2
layer 6 of ERCx	5/301	0.925386	0.999962	0	0	0.584832	0.0453506	DNAJA1;CDH2;PLIN2;LCP1;FDFT1
layer 6 of PrS	5/301	0.925386	0.999962	0	0	0.584832	0.0453506	TMEFF1;CHL1;CD14;NR3C1;TRIB2
layer 6a of PrS	5/301	0.925386	0.999962	0	0	0.584832	0.0453506	TMEFF1;CHL1;CD14;NR3C1;TRIB2
liminal part of alar p2	5/301	0.925386	0.999962	0	0	0.584832	0.0453506	RAB3C;RIMS3;RGS16;RPL24;LSS
liminal part of r4 alar plate	5/301	0.925386	0.999962	0	0	0.584832	0.0453506	LGALS1;PRDX1;SPP1;GPC2;MMP9
liminal part of the r5 alar plate	5/301	0.925386	0.999962	0	0	0.584832	0.0453506	LGALS1;PRDX1;SPP1;GPC2;MMP9
m1 (rostral) midbrain tegmentum	5/301	0.925386	0.999962	0	0	0.584832	0.0453506	ACLY;SDC2;SPP1;SNCG;CXCL13
m1B part of the periaqueductal gray	5/301	0.925386	0.999962	0	0	0.584832	0.0453506	VAT1;ACLY;LGALS1;FAU;AP2M1
m2 part of substantia nigra compacta	5/301	0.925386	0.999962	0	0	0.584832	0.0453506	VAT1;NRG4;SDC2;L1CAM;LSS
mammillary area	5/301	0.925386	0.999962	0	0	0.584832	0.0453506	IL1RN;S100A6;TXNIP;RPL37;TIMP1
mammillary part of PHyB	5/301	0.925386	0.999962	0	0	0.584832	0.0453506	IFITM3;IL1RN;RGS1;S100A6;TIMP1
mammillary part of THyB	5/301	0.925386	0.999962	0	0	0.584832	0.0453506	IL1RN;S100A6;TXNIP;RPL37;TIMP1
mantle zone of FCx	5/301	0.925386	0.999962	0	0	0.584832	0.0453506	TMEFF1;ACAP3;IL1RN;TYROBP;SH3BGRL3
mantle zone of PcPL	5/301	0.925386	0.999962	0	0	0.584832	0.0453506	NGRN;RIMS3;RGS16;LAPTM5;TNC
mantle zone of RMa	5/301	0.925386	0.999962	0	0	0.584832	0.0453506	IFITM3;IL1RN;RGS1;S100A6;TIMP1
mantle zone of SC	5/301	0.925386	0.999962	0	0	0.584832	0.0453506	GDF15;S100A6;RPL27;NEUROG2;SMARCA4
mantle zone of Str	5/301	0.925386	0.999962	0	0	0.584832	0.0453506	CAP1;RGS2;SERPINE2;SCRN1;ATP2B1
mantle zone of VAP	5/301	0.925386	0.999962	0	0	0.584832	0.0453506	MARCKSL1;PKIA;NR2F1;HDGF;CXCL13
mantle zone of p3ZL	5/301	0.925386	0.999962	0	0	0.584832	0.0453506	RAB31;GPX1;RGS16;NR2F1;LSS
mantle zone of r10BL	5/301	0.925386	0.999962	0	0	0.584832	0.0453506	TOP2A;NRG4;HMGA1;S100A4;YWHAZ
mantle zone of r10Tr	5/301	0.925386	0.999962	0	0	0.584832	0.0453506	EBF3;TAGLN2;PLIN2;A2M;YWHAZ
mantle zone of r1BI	5/301	0.925386	0.999962	0	0	0.584832	0.0453506	CSTB;RPL12;PLXNA1;SNCG;LSS
mantle zone of r4Lim	5/301	0.925386	0.999962	0	0	0.584832	0.0453506	LGALS1;PRDX1;SPP1;GPC2;MMP9
mantle zone of r5BL	5/301	0.925386	0.999962	0	0	0.584832	0.0453506	LGALS1;NRG4;PABPC4;RPL12;SPP1
mantle zone of r5Lim	5/301	0.925386	0.999962	0	0	0.584832	0.0453506	LGALS1;PRDX1;SPP1;GPC2;MMP9
mantle zone of r6Co	5/301	0.925386	0.999962	0	0	0.584832	0.0453506	FADS2;MMP14;CCL20;LCP1;WLS
medial amygdala, posteroventral part	5/301	0.925386	0.999962	0	0	0.584832	0.0453506	MARCKSL1;TRIM28;PKIA;LAPTM5;AP2M1
medial geniculate nucleus	5/301	0.925386	0.999962	0	0	0.584832	0.0453506	RPL18A;PKIA;RGS16;RPL11;FGFBP3
medial pallium (hippocampal allocortex)	5/301	0.925386	0.999962	0	0	0.584832	0.0453506	FOXG1;RPL22;LAPTM5;ISLR2;PFN1
mediodorsal nucleus	5/301	0.925386	0.999962	0	0	0.584832	0.0453506	RAB3C;RIMS3;RGS16;CTNNB1;L1CAM
molecular layer of S	5/301	0.925386	0.999962	0	0	0.584832	0.0453506	TMEFF1;CHL1;FOXG1;RPL22;CELF5
molecular layer of the DG	5/301	0.925386	0.999962	0	0	0.584832	0.0453506	PKIA;RPL22;ISLR2;PFN1;XPR1
nucleus of the inferior collicular brachium, caudal part	5/301	0.925386	0.999962	0	0	0.584832	0.0453506	IFITM3;TOP2A;GRN;S100A6;CD14
nucleus sagulum, superficial part	5/301	0.925386	0.999962	0	0	0.584832	0.0453506	IFITM3;IGFBP2;S100A6;TAGLN2;CD14
pararubral nucleus, m1 part	5/301	0.925386	0.999962	0	0	0.584832	0.0453506	APC2;IL1B;SPP1;SNCG;AP2M1
periventricular stratum of SC	5/301	0.925386	0.999962	0	0	0.584832	0.0453506	RPS8;STXBP1;TTC3;PLXNA1;SNCG
periventricular stratum of m1B	5/301	0.925386	0.999962	0	0	0.584832	0.0453506	VAT1;ACLY;LGALS1;FAU;AP2M1
periventricular stratum of m2ADL	5/301	0.925386	0.999962	0	0	0.584832	0.0453506	FADS2;SERPINE2;RPS18;SNCG;EBF3
periventricular stratum of r1BM	5/301	0.925386	0.999962	0	0	0.584832	0.0453506	SOX2;CD82;RPL37A;AMPD3;FDFT1
periventricular stratum of r2BM	5/301	0.925386	0.999962	0	0	0.584832	0.0453506	SYT4;HNRNPA2B1;IGFBP2;TXNIP;YBX1
posterior triangular nucleus	5/301	0.925386	0.999962	0	0	0.584832	0.0453506	YWHAE;RIMS3;YWHAQ;RGS16;YWHAH
precommissural pretectal domain	5/301	0.925386	0.999962	0	0	0.584832	0.0453506	NGRN;RIMS3;RGS16;LAPTM5;TNC
preisthmic tegmentum	5/301	0.925386	0.999962	0	0	0.584832	0.0453506	SDC2;RPL12;PNOC;SNCG;EBF3
prosomere 1	5/301	0.925386	0.999962	0	0	0.584832	0.0453506	SDC2;RGS16;LAPTM5;TNC;LSS
putamen	5/301	0.925386	0.999962	0	0	0.584832	0.0453506	CAP1;RGS2;SERPINE2;SCRN1;ATP2B1
r1 basal plate	5/301	0.925386	0.999962	0	0	0.584832	0.0453506	VAT1;CSTB;SNCG;AMPD3;S100A10
r1 part of basointermediate reticular formation	5/301	0.925386	0.999962	0	0	0.584832	0.0453506	CSTB;RPL12;PLXNA1;SNCG;LSS
r1 part of basomedial reticular formation	5/301	0.925386	0.999962	0	0	0.584832	0.0453506	YWHAQ;CRABP1;SPP1;LSS;SMARCA4
r1 part of dorsal raphe nucleus	5/301	0.925386	0.999962	0	0	0.584832	0.0453506	SOX2;ACLY;RPL37A;AMPD3;FDFT1
r1 part of superior vestibular nucleus	5/301	0.925386	0.999962	0	0	0.584832	0.0453506	LGALS1;SPP1;INHBA;NEUROG2;WLS
r10 part of basointermediate reticular formation	5/301	0.925386	0.999962	0	0	0.584832	0.0453506	TOP2A;SLC38A1;HMGA1;S100A4;YWHAZ
r10 part of basolateral reticular formation	5/301	0.925386	0.999962	0	0	0.584832	0.0453506	TOP2A;NRG4;HMGA1;S100A4;YWHAZ
r10 part of the trigeminal column	5/301	0.925386	0.999962	0	0	0.584832	0.0453506	EBF3;TAGLN2;PLIN2;A2M;YWHAZ
r2 part of anteroventral cochlear nucleus	5/301	0.925386	0.999962	0	0	0.584832	0.0453506	BTG1;RGS1;IGFBP2;LCP1;ZFP36L1
r2 part of dorsal parvicellular reticular formation	5/301	0.925386	0.999962	0	0	0.584832	0.0453506	LGALS1;GPX1;SPP1;MSN;SAT1
r2 part of lateral pontine nuclei	5/301	0.925386	0.999962	0	0	0.584832	0.0453506	NRG4;SPP1;HLA-A;HSPG2;RPS13
r2 part of principal trigeminal sensory nucleus	5/301	0.925386	0.999962	0	0	0.584832	0.0453506	CCL20;CFL1;SPP1;TXNIP;LSS
r2 part of the trigeminal motor nucleus	5/301	0.925386	0.999962	0	0	0.584832	0.0453506	ACLY;LGALS1;MSN;AP2M1;S100A10
r5 part of ventral lateral lemniscal nucleus	5/301	0.925386	0.999962	0	0	0.584832	0.0453506	NRG4;SPP1;TREM2;ND3;RPS13
r6 part of the cochlear column	5/301	0.925386	0.999962	0	0	0.584832	0.0453506	FADS2;MMP14;CCL20;LCP1;WLS
r7 part of parapyramidal nucleus	5/301	0.925386	0.999962	0	0	0.584832	0.0453506	RGS1;NRG4;IL1B;SNCG;S100A10
r7 part of the nucleus of Roller	5/301	0.925386	0.999962	0	0	0.584832	0.0453506	CSTB;RGS1;SNCG;TIMP1;FDFT1
r9 part of spinal vestibular nucleus	5/301	0.925386	0.999962	0	0	0.584832	0.0453506	CD82;IL1B;IGFBP3;EBF3;UBA1
r9 portion of ambiguous motor nucleus (postmigratory)	5/301	0.925386	0.999962	0	0	0.584832	0.0453506	TOP2A;SYT4;S100A4;YWHAZ;EIF4B
retromammillary area	5/301	0.925386	0.999962	0	0	0.584832	0.0453506	IFITM3;IL1RN;RGS1;S100A6;TIMP1
retromammillary area, lateral part	5/301	0.925386	0.999962	0	0	0.584832	0.0453506	IFITM3;IL1RN;RGS1;CXCL13;RPS13
retropontine reticular area	5/301	0.925386	0.999962	0	0	0.584832	0.0453506	TMEFF1;CSTB;RGS2;FCER1G;HSPG2
septopallidal shell area	5/301	0.925386	0.999962	0	0	0.584832	0.0453506	RGS2;ALCAM;TSC22D1;COL6A1;PHLDA1
shell of SCH	5/301	0.925386	0.999962	0	0	0.584832	0.0453506	IFITM3;RGS1;CRABP1;CXCL13;MMP9
shell part of the anterobasal nucleus	5/301	0.925386	0.999962	0	0	0.584832	0.0453506	IFITM3;VAT1;TRIM28;PEG10;CXCL13
striatum (corpus striatum)	5/301	0.925386	0.999962	0	0	0.584832	0.0453506	CAP1;RGS2;SERPINE2;SCRN1;ATP2B1
subbrachial nucleus, rostral part	5/301	0.925386	0.999962	0	0	0.584832	0.0453506	GRN;SPARC;ITGB2;CD14;YWHAZ
superficial gray layer of SC	5/301	0.925386	0.999962	0	0	0.584832	0.0453506	IFITM3;GDF15;S100A6;NEUROG2;SMARCA4
superficial stratum of CoPD	5/301	0.925386	0.999962	0	0	0.584832	0.0453506	RPL18A;PKIA;ISLR2;XPR1;PRRC2A
superficial stratum of CoPL	5/301	0.925386	0.999962	0	0	0.584832	0.0453506	SPARC;RPL18A;GDF15;PKIA;LAPTM5
superficial stratum of FCx (cortical plate/marginal zone)	5/301	0.925386	0.999962	0	0	0.584832	0.0453506	TMEFF1;ACAP3;IL1RN;TYROBP;SH3BGRL3
superficial stratum of PHyB-P	5/301	0.925386	0.999962	0	0	0.584832	0.0453506	RGS1;PABPC4;RPL12;CXCL13;RPS13
superficial stratum of SC	5/301	0.925386	0.999962	0	0	0.584832	0.0453506	IFITM3;GDF15;S100A6;NEUROG2;SMARCA4
superficial stratum of TSPaA	5/301	0.925386	0.999962	0	0	0.584832	0.0453506	IFITM3;RGS1;CRABP1;CXCL13;MMP9
superficial stratum of VPrP	5/301	0.925386	0.999962	0	0	0.584832	0.0453506	ACTR2;TYROBP;PTN;HMGCR;AP2M1
superficial stratum of VTTh	5/301	0.925386	0.999962	0	0	0.584832	0.0453506	RPL18A;PKIA;RGS16;RPL11;FGFBP3
superficial stratum of m1AL	5/301	0.925386	0.999962	0	0	0.584832	0.0453506	GRN;SPARC;ITGB2;CD14;YWHAZ
superficial stratum of m2ADL	5/301	0.925386	0.999962	0	0	0.584832	0.0453506	IFITM3;IGFBP2;S100A6;TAGLN2;CD14
superficial stratum of r2BI	5/301	0.925386	0.999962	0	0	0.584832	0.0453506	NRG4;SPP1;HLA-A;HSPG2;RPS13
superficial stratum of r2Co	5/301	0.925386	0.999962	0	0	0.584832	0.0453506	BTG1;RGS1;IGFBP2;LCP1;ZFP36L1
superficial stratum of r2Lim	5/301	0.925386	0.999962	0	0	0.584832	0.0453506	ACLY;LGALS1;MSN;AP2M1;S100A10
superficial stratum of r2Tr	5/301	0.925386	0.999962	0	0	0.584832	0.0453506	CCL20;CFL1;SPP1;TXNIP;LSS
superficial stratum of r7BM	5/301	0.925386	0.999962	0	0	0.584832	0.0453506	RGS1;NRG4;IL1B;SNCG;S100A10
superficial stratum of r8BL	5/301	0.925386	0.999962	0	0	0.584832	0.0453506	TOP2A;TRIM28;TSC22D1;NRG4;EIF4B
superficial stratum of r9BL	5/301	0.925386	0.999962	0	0	0.584832	0.0453506	TOP2A;TRIM28;NRG4;S100A4;EIF4B
superficial stratum of r9Lim	5/301	0.925386	0.999962	0	0	0.584832	0.0453506	TOP2A;SYT4;S100A4;YWHAZ;EIF4B
superficial stratum of the VAP	5/301	0.925386	0.999962	0	0	0.584832	0.0453506	MARCKSL1;RPS7;PKIA;NR2F1;CXCL13
temporotympanic muscle trigeminal motor cell group	5/301	0.925386	0.999962	0	0	0.584832	0.0453506	ACLY;LGALS1;TXNIP;LSS;AP2M1
ventral lateral nucleus	5/301	0.925386	0.999962	0	0	0.584832	0.0453506	RIMS3;RGS16;NR2F1;L1CAM;SAT1
ventral nuclei	5/301	0.925386	0.999962	0	0	0.584832	0.0453506	RIMS3;RGS16;NR2F1;MYO5A;L1CAM
ventral part of CoP	5/301	0.925386	0.999962	0	0	0.584832	0.0453506	RPL27A;RPL24;ATP5G3;AGRN;PRDX6
ventral posteromedial nucleus	5/301	0.925386	0.999962	0	0	0.584832	0.0453506	IL1B;RGS16;NR2F1;MYO5A;L1CAM
ventropallial amygdalopiriform area	5/301	0.925386	0.999962	0	0	0.584832	0.0453506	MARCKSL1;PKIA;NR2F1;HDGF;CXCL13
Nucleus incertus	7/398	0.93032	0.999962	0	0	0.618995	0.0447078	SYT4;CD82;IGFBP2;HNRNPA2B1;SNCG;PLIN2;YBX1
Peripeduncular nucleus	10/532	0.930348	0.999962	0	0	0.661409	0.0477516	RPL18A;YWHAQ;CCL20;PKIA;FOXG1;RPL11;CRMP1;HNRNPC;FGFBP3;PJA2
Field CA2, stratum radiatum	7/410	0.942088	0.999962	0	0	0.600186	0.0358049	GNAO1;FOXG1;PLXNA1;ISLR2;CRMP1;PFN1;VAMP2
Subiculum	6/389	0.962366	0.999962	0	0	0.540896	0.0207489	TMEFF1;CHL1;YWHAB;FOXG1;RPL22;NR3C1
Subgeniculate nucleus	7/443	0.96588	0.999962	0	0	0.553797	0.0192256	GPX1;CD82;YWHAQ;CRABP1;PNOC;MSN;LSS
Accessory olfactory bulb, glomerular layer	4/301	0.970229	0.999962	0	0	0.465424	0.0140665	IL1RN;IL1B;INHBA;SOX4
Agranular insular area, posterior part	4/301	0.970229	0.999962	0	0	0.465424	0.0140665	GNAO1;GNG2;ISLR2;FDFT1
Agranular insular area, ventral part, layer 1	4/301	0.970229	0.999962	0	0	0.465424	0.0140665	DNAJA1;TYROBP;S100A4;AP2M1
Anterior cingulate area	4/301	0.970229	0.999962	0	0	0.465424	0.0140665	SQLE;S100A6;KIF21B;DUSP6
Anterior cingulate area, dorsal part, layer 2/3	4/301	0.970229	0.999962	0	0	0.465424	0.0140665	IL1RN;S100A6;KIF21B;SMARCA4
Anterior cingulate area, ventral part	4/301	0.970229	0.999962	0	0	0.465424	0.0140665	SQLE;S100A6;DUSP6;NEUROG2
Anterior pretectal nucleus	4/301	0.970229	0.999962	0	0	0.465424	0.0140665	NGRN;RGS16;LAPTM5;TNC
Anteromedial visual area	4/301	0.970229	0.999962	0	0	0.465424	0.0140665	CDKN1A;TNRC18;HMGCR;DUSP6
Basolateral amygdalar nucleus, posterior part	4/301	0.970229	0.999962	0	0	0.465424	0.0140665	DNAJA1;NR2F1;PLAUR;AP2M1
Basomedial amygdalar nucleus	4/301	0.970229	0.999962	0	0	0.465424	0.0140665	DNER;NR2F1;AP2M1;PRPH
Cerebellar nuclei	4/301	0.970229	0.999962	0	0	0.465424	0.0140665	BTG1;TTR;ITGB2;S100A4
Cortical amygdalar area, anterior part	4/301	0.970229	0.999962	0	0	0.465424	0.0140665	MARCKSL1;TRIM28;AP2M1;PRPH
Cortical amygdalar area, posterior part, lateral zone	4/301	0.970229	0.999962	0	0	0.465424	0.0140665	MARCKSL1;TRIM28;PKIA;PRPH
Cortical amygdalar area, posterior part, lateral zone, layer 1	4/301	0.970229	0.999962	0	0	0.465424	0.0140665	MMP14;MARCKSL1;TRIM28;RPS13
Cortical amygdalar area, posterior part, medial zone, layer 1	4/301	0.970229	0.999962	0	0	0.465424	0.0140665	MARCKSL1;PKIA;CDH13;CXCL13
Dorsal cochlear nucleus	4/301	0.970229	0.999962	0	0	0.465424	0.0140665	MMP14;TTR;CCL20;LCP1
Dorsal part of the lateral geniculate complex	4/301	0.970229	0.999962	0	0	0.465424	0.0140665	RGS16;HNRNPC;L1CAM;CLASP2
Entorhinal area, medial part, ventral zone, layer 2	4/301	0.970229	0.999962	0	0	0.465424	0.0140665	TSC22D1;FOXG1;HDGF;CXCL13
Fields of Forel	4/301	0.970229	0.999962	0	0	0.465424	0.0140665	YWHAQ;PLXNA1;RPL35A;LSS
Frontal pole, layer 1	4/301	0.970229	0.999962	0	0	0.465424	0.0140665	IFITM3;IL1RN;SH3BGRL3;SOX4
Hippocampal formation	4/301	0.970229	0.999962	0	0	0.465424	0.0140665	FOXG1;RPL22;ISLR2;PFN1
Hippocampal region	4/301	0.970229	0.999962	0	0	0.465424	0.0140665	FOXG1;RPL22;ISLR2;PFN1
Intergeniculate leaflet of the lateral geniculate complex	4/301	0.970229	0.999962	0	0	0.465424	0.0140665	YWHAQ;RGS16;L1CAM;LSS
Interstitial nucleus of Cajal	4/301	0.970229	0.999962	0	0	0.465424	0.0140665	PNOC;EBF3;AGRN;LSS
Lateral dorsal nucleus of thalamus	4/301	0.970229	0.999962	0	0	0.465424	0.0140665	CD82;RGS16;IGFBP2;TNC
Magnocellular reticular nucleus	4/301	0.970229	0.999962	0	0	0.465424	0.0140665	TOP2A;RGS1;IL1B;S100A10
Medial amygdalar nucleus, anteroventral part	4/301	0.970229	0.999962	0	0	0.465424	0.0140665	IFITM3;MARCKSL1;TRIM28;LAPTM5
Medial vestibular nucleus	4/301	0.970229	0.999962	0	0	0.465424	0.0140665	TTR;IGFBP2;ITGB2;INHBA
Nucleus of the brachium of the inferior colliculus	4/301	0.970229	0.999962	0	0	0.465424	0.0140665	GRN;SPARC;CCL20;PKIA
Orbital area, lateral part	4/301	0.970229	0.999962	0	0	0.465424	0.0140665	IL1RN;IL1B;LAPTM5;NEUROG2
Orbital area, lateral part, layer 2/3	4/301	0.970229	0.999962	0	0	0.465424	0.0140665	IL1RN;IL1B;LAPTM5;NEUROG2
Pallidum	4/301	0.970229	0.999962	0	0	0.465424	0.0140665	RGS2;GPX1;PEG10;CRABP1
Parabrachial nucleus, lateral division, superior lateral part	4/301	0.970229	0.999962	0	0	0.465424	0.0140665	SPARC;RPS18;RPS20;NCAM1
Paraflocculus, molecular layer	4/301	0.970229	0.999962	0	0	0.465424	0.0140665	BTG1;ATN1;LCP1;ZFP36L1
Parapyramidal nucleus	4/301	0.970229	0.999962	0	0	0.465424	0.0140665	NRG4;HNRNPA2B1;RPS13;S100A10
Parasubiculum, layer 3	4/301	0.970229	0.999962	0	0	0.465424	0.0140665	TMEFF1;CDH2;TRIB2;PRPH
Parasubthalamic nucleus	4/301	0.970229	0.999962	0	0	0.465424	0.0140665	GNG2;ALOX5AP;DCLK1;GNAI2
Piriform-amygdalar area, pyramidal layer	4/301	0.970229	0.999962	0	0	0.465424	0.0140665	MARCKSL1;TYROBP;PKIA;PRPH
Pons, sensory related	4/301	0.970229	0.999962	0	0	0.465424	0.0140665	LGALS1;PRDX1;SPP1;TXNIP
Pontine reticular nucleus, caudal part	4/301	0.970229	0.999962	0	0	0.465424	0.0140665	CSTB;SPP1;AGRN;HSPG2
Posterior pretectal nucleus	4/301	0.970229	0.999962	0	0	0.465424	0.0140665	UBN2;TNC;RPL27;PRRC2A
Posterolateral visual area, layer 6a	4/301	0.970229	0.999962	0	0	0.465424	0.0140665	CDKN1A;PLAUR;CTNNB1;NR3C1
Pretectal region	4/301	0.970229	0.999962	0	0	0.465424	0.0140665	NGRN;RGS16;LAPTM5;TNC
Primary somatosensory area, barrel field, layer 5	4/301	0.970229	0.999962	0	0	0.465424	0.0140665	LASP1;LRP1;PPT1;PTN
Primary somatosensory area, lower limb, layer 1	4/301	0.970229	0.999962	0	0	0.465424	0.0140665	TRIM28;FOXG1;ENC1;CDK5R1
Primary somatosensory area, mouth, layer 1	4/301	0.970229	0.999962	0	0	0.465424	0.0140665	CELF5;TREM2;YWHAZ;YWHAH
Primary somatosensory area, nose, layer 6b	4/301	0.970229	0.999962	0	0	0.465424	0.0140665	ACTR2;TYROBP;PLAUR;ACTN4
Primary somatosensory area, unassigned	4/301	0.970229	0.999962	0	0	0.465424	0.0140665	PLAUR;ACTN4;PTN;PRPH
Primary somatosensory area, unassigned, layer 4	4/301	0.970229	0.999962	0	0	0.465424	0.0140665	CIRBP;PLAUR;TNRC18;PTN
Primary somatosensory area, unassigned, layer 6a	4/301	0.970229	0.999962	0	0	0.465424	0.0140665	TMEFF1;ACAP3;LASP1;CD14
Primary somatosensory area, upper limb, layer 5	4/301	0.970229	0.999962	0	0	0.465424	0.0140665	LASP1;LRP1;PTN;B2M
Primary visual area, layer 2/3	4/301	0.970229	0.999962	0	0	0.465424	0.0140665	TNRC18;DCLK1;DUSP6;MCL1
Retrosplenial area, dorsal part	4/301	0.970229	0.999962	0	0	0.465424	0.0140665	TNRC18;S100A4;DUSP6;SMARCA4
Retrosplenial area, dorsal part, layer 5	4/301	0.970229	0.999962	0	0	0.465424	0.0140665	CDKN1A;RAB6B;DUSP6;SMARCA4
Somatomotor areas	4/301	0.970229	0.999962	0	0	0.465424	0.0140665	TMEFF1;ACAP3;TYROBP;SH3BGRL3
Subparafascicular nucleus, parvicellular part	4/301	0.970229	0.999962	0	0	0.465424	0.0140665	RIMS3;YWHAQ;RGS16;LSS
Substantia innominata	4/301	0.970229	0.999962	0	0	0.465424	0.0140665	RGS2;CRABP1;VAMP2;AP2M1
Subthalamic nucleus	4/301	0.970229	0.999962	0	0	0.465424	0.0140665	GNG2;YWHAQ;TMBIM6;DCLK1
Superior olivary complex, medial part	4/301	0.970229	0.999962	0	0	0.465424	0.0140665	LGALS1;PABPC4;RPL12;S100A10
Superior olivary complex, periolivary region	4/301	0.970229	0.999962	0	0	0.465424	0.0140665	NRG4;SPP1;HLA-A;RPS13
Superior vestibular nucleus	4/301	0.970229	0.999962	0	0	0.465424	0.0140665	LGALS1;SPP1;INHBA;SAT1
Supplemental somatosensory area	4/301	0.970229	0.999962	0	0	0.465424	0.0140665	PPT1;PLAUR;IER3;FDFT1
Supramammillary nucleus, lateral part	4/301	0.970229	0.999962	0	0	0.465424	0.0140665	RGS1;PABPC4;EBF3;CXCL13
Taenia tecta, ventral part, layer 2	4/301	0.970229	0.999962	0	0	0.465424	0.0140665	TMEFF1;GDF15;FTH1;INHBA
Tegmental reticular nucleus	4/301	0.970229	0.999962	0	0	0.465424	0.0140665	GRN;STXBP1;ATP5A1;SPP1
Temporal association areas, layer 5	4/301	0.970229	0.999962	0	0	0.465424	0.0140665	PLAUR;PLIN2;RPS27A;NR3C1
Temporal association areas, layer 6b	4/301	0.970229	0.999962	0	0	0.465424	0.0140665	DNAJA1;PLAUR;HNRNPC;SYT13
Ventral anterior-lateral complex of the thalamus	4/301	0.970229	0.999962	0	0	0.465424	0.0140665	IL1B;RGS16;NR2F1;L1CAM
Ventral cochlear nucleus	4/301	0.970229	0.999962	0	0	0.465424	0.0140665	CCL20;TXNIP;PLIN2;RBMX
Ventral posterolateral nucleus of the thalamus, parvicellular part	4/301	0.970229	0.999962	0	0	0.465424	0.0140665	YWHAQ;IL1B;RGS16;ATP5G3
Vestibular nuclei	4/301	0.970229	0.999962	0	0	0.465424	0.0140665	TTR;ITGB2;SOX11;INHBA
alar plate of p1	4/301	0.970229	0.999962	0	0	0.465424	0.0140665	RGS16;LAPTM5;TNC;RPL24
anterior olfactory area, dorsal part	4/301	0.970229	0.999962	0	0	0.465424	0.0140665	IL1RN;GDF15;DCX;SOX11
anterior pretectal nucleus, ventral superficial part	4/301	0.970229	0.999962	0	0	0.465424	0.0140665	SPARC;PKIA;RGS16;ITGB2
basolateral amygdaloid nucleus, ventral part	4/301	0.970229	0.999962	0	0	0.465424	0.0140665	DNAJA1;PLAUR;LCP1;AP2M1
basomedial amygdaloid nucleus, anterior part	4/301	0.970229	0.999962	0	0	0.465424	0.0140665	MARCKSL1;NR2F1;AP2M1;PRPH
commissural pretectal domain	4/301	0.970229	0.999962	0	0	0.465424	0.0140665	PKIA;LAPTM5;RPL27;PRDX6
diagonal domain	4/301	0.970229	0.999962	0	0	0.465424	0.0140665	RGS2;GPX1;PABPC4;CRABP1
dorsal part of CoP	4/301	0.970229	0.999962	0	0	0.465424	0.0140665	RPL18A;PKIA;RPL27;PRRC2A
dorsal subnucleus of MG	4/301	0.970229	0.999962	0	0	0.465424	0.0140665	RPL18A;PKIA;RGS16;FGFBP3
dorsolateral IC periaqueductal gray	4/301	0.970229	0.999962	0	0	0.465424	0.0140665	RPS8;PLXNA1;SNCG;AGRN
dorsolateral part of Med	4/301	0.970229	0.999962	0	0	0.465424	0.0140665	BTG1;SOX11;S100A4;NEUROG2
dorsomedial tegmental nucleus	4/301	0.970229	0.999962	0	0	0.465424	0.0140665	CSTB;CD82;PNOC;AGRN
horizontal nucleus of the diagonal band	4/301	0.970229	0.999962	0	0	0.465424	0.0140665	PABPC4;TIMP1;CXCL13;RPS13
horizontal nucleus of the diagonal band, transitional part	4/301	0.970229	0.999962	0	0	0.465424	0.0140665	NRG4;COL6A1;TIMP1;SMARCA4
intergeniculate leaflet	4/301	0.970229	0.999962	0	0	0.465424	0.0140665	RPL18A;YWHAQ;RGS16;LSS
intermediate part of r8B	4/301	0.970229	0.999962	0	0	0.465424	0.0140665	TOP2A;CD164;SNCG;S100A10
intermediate part of r9B	4/301	0.970229	0.999962	0	0	0.465424	0.0140665	TOP2A;LGALS1;TXNIP;SNCG
intermediate stratum of CoPV	4/301	0.970229	0.999962	0	0	0.465424	0.0140665	STXBP1;HNRNPA2B1;TNC;ATP5G3
intermediate stratum of LAP	4/301	0.970229	0.999962	0	0	0.465424	0.0140665	DNAJA1;NR2F1;PLAUR;AP2M1
intermediate stratum of m1AL	4/301	0.970229	0.999962	0	0	0.465424	0.0140665	TOP2A;GRN;S100A6;CD14
intermediate stratum of r10Ve	4/301	0.970229	0.999962	0	0	0.465424	0.0140665	MMP14;CD82;IGFBP3;UBA1
intermediate stratum of r2BI	4/301	0.970229	0.999962	0	0	0.465424	0.0140665	CSTB;SPP1;HMGA1;AGRN
intermediate stratum of r2Tr	4/301	0.970229	0.999962	0	0	0.465424	0.0140665	LGALS1;SPP1;MSN;SAT1
intermediate stratum of r4Lim	4/301	0.970229	0.999962	0	0	0.465424	0.0140665	LGALS1;PRDX1;GPC2;MMP9
intermediate stratum of r5BM	4/301	0.970229	0.999962	0	0	0.465424	0.0140665	CSTB;RGS2;SPP1;HSPG2
intermediate stratum of r5Lim	4/301	0.970229	0.999962	0	0	0.465424	0.0140665	LGALS1;SPP1;GPC2;MMP9
intermediate stratum of r8BL	4/301	0.970229	0.999962	0	0	0.465424	0.0140665	TOP2A;TRIM28;NRG4;HLA-A
intermediate stratum of r8Ve	4/301	0.970229	0.999962	0	0	0.465424	0.0140665	IGFBP3;EBF3;A2M;YWHAZ
intermediate stratum of r9BL	4/301	0.970229	0.999962	0	0	0.465424	0.0140665	TOP2A;NRG4;HMGA1;S100A4
isthmic liminal reticular area	4/301	0.970229	0.999962	0	0	0.465424	0.0140665	PCSK1N;RPS18;RPS6;RPS20
isthmic part of the intermediate lateral lemniscal nucleus	4/301	0.970229	0.999962	0	0	0.465424	0.0140665	SYT4;IL1RN;RPS20;CD14
isthmic part of the periaqueductal gray	4/301	0.970229	0.999962	0	0	0.465424	0.0140665	RPS18;PLXNA1;RPS20;RPL37
isthmic vestibulocerebellar nucleus	4/301	0.970229	0.999962	0	0	0.465424	0.0140665	PRDX1;DBI;B2M;WLS
lateral (dentate) cerebellar nucleus	4/301	0.970229	0.999962	0	0	0.465424	0.0140665	CCL20;ITGB2;DBI;ZFP36L1
lateral part of CoP	4/301	0.970229	0.999962	0	0	0.465424	0.0140665	PKIA;LAPTM5;RPL24;RPL27
lateral part of r8B	4/301	0.970229	0.999962	0	0	0.465424	0.0140665	TOP2A;TRIM28;NRG4;HLA-A
lateral part of r9B	4/301	0.970229	0.999962	0	0	0.465424	0.0140665	TOP2A;NRG4;HMGA1;S100A4
lateral tuberal nucleus	4/301	0.970229	0.999962	0	0	0.465424	0.0140665	GRN;MARCKSL1;ALOX5AP;TXNIP
layer 1 of AOD cortex	4/301	0.970229	0.999962	0	0	0.465424	0.0140665	IL1RN;GDF15;LAPTM5;SOX11
layer 1 of AOV cortex	4/301	0.970229	0.999962	0	0	0.465424	0.0140665	IL1RN;DCX;INHBA;NEUROG2
layer 1 of PrS	4/301	0.970229	0.999962	0	0	0.465424	0.0140665	HNRNPK;GDF15;PKIA;VIM
layer 2 of PRh-Ect	4/301	0.970229	0.999962	0	0	0.465424	0.0140665	PLAUR;HMGCR;RPS27A;FDFT1
layer 2 of RSC	4/301	0.970229	0.999962	0	0	0.465424	0.0140665	PLIN2;HMGCR;NR3C1;GLTSCR2
layer 3 of LPrP cortex	4/301	0.970229	0.999962	0	0	0.465424	0.0140665	ACTR2;TYROBP;ISLR2;PTN
layer 4 of RSC	4/301	0.970229	0.999962	0	0	0.465424	0.0140665	CHL1;CTNNB1;HMGCR;NR3C1
layer 5 of PRh-Ect	4/301	0.970229	0.999962	0	0	0.465424	0.0140665	DNAJA1;PLAUR;HNRNPC;SYT13
layer 5 of RSC	4/301	0.970229	0.999962	0	0	0.465424	0.0140665	CHL1;YWHAB;CTNNB1;NR3C1
liminal part of r2 alar plate	4/301	0.970229	0.999962	0	0	0.465424	0.0140665	LGALS1;MSN;LCP1;S100A10
liminal part of the r10 alar plate	4/301	0.970229	0.999962	0	0	0.465424	0.0140665	ACLY;LGALS1;MSN;YWHAZ
liminal reticular formation of m2	4/301	0.970229	0.999962	0	0	0.465424	0.0140665	IFITM3;GRN;ITGB2;CD14
m2 basal plate	4/301	0.970229	0.999962	0	0	0.465424	0.0140665	SDC2;RPL12;SNCG;EBF3
mantle zone of AOD	4/301	0.970229	0.999962	0	0	0.465424	0.0140665	IL1RN;GDF15;DCX;SOX11
mantle zone of CoPD	4/301	0.970229	0.999962	0	0	0.465424	0.0140665	RPL18A;PKIA;RPL27;PRRC2A
mantle zone of CoPL	4/301	0.970229	0.999962	0	0	0.465424	0.0140665	PKIA;LAPTM5;RPL24;RPL27
mantle zone of JcPV	4/301	0.970229	0.999962	0	0	0.465424	0.0140665	TNC;MRFAP1;ATP5G3;PRDX6
mantle zone of LAP	4/301	0.970229	0.999962	0	0	0.465424	0.0140665	MARCKSL1;NR2F1;LCP1;PRPH
mantle zone of Mam	4/301	0.970229	0.999962	0	0	0.465424	0.0140665	IL1RN;S100A6;RPL37;TIMP1
mantle zone of PCx	4/301	0.970229	0.999962	0	0	0.465424	0.0140665	ENC1;TNRC18;PTN;DUSP6
mantle zone of PcPV	4/301	0.970229	0.999962	0	0	0.465424	0.0140665	RIMS3;RGS16;TNC;RPL24
mantle zone of VPrP	4/301	0.970229	0.999962	0	0	0.465424	0.0140665	ACTR2;TYROBP;PTN;HMGCR
mantle zone of m1B	4/301	0.970229	0.999962	0	0	0.465424	0.0140665	ACLY;SDC2;SPP1;SNCG
mantle zone of p2Lim	4/301	0.970229	0.999962	0	0	0.465424	0.0140665	RIMS3;RGS16;RPL24;LSS
mantle zone of r10Lim	4/301	0.970229	0.999962	0	0	0.465424	0.0140665	ACLY;LGALS1;MSN;YWHAZ
mantle zone of r10Ve	4/301	0.970229	0.999962	0	0	0.465424	0.0140665	GDF15;IGFBP3;PLIN2;UBA1
mantle zone of r11Tr	4/301	0.970229	0.999962	0	0	0.465424	0.0140665	ACAP3;MMP14;TNRC18;ATP9A
mantle zone of r1BM	4/301	0.970229	0.999962	0	0	0.465424	0.0140665	CSTB;DPYSL5;SDC2;AMPD3
mantle zone of r2Lim	4/301	0.970229	0.999962	0	0	0.465424	0.0140665	LGALS1;MSN;LCP1;S100A10
mantle zone of r5BM	4/301	0.970229	0.999962	0	0	0.465424	0.0140665	CSTB;RGS2;SPP1;HSPG2
mantle zone of r7Co	4/301	0.970229	0.999962	0	0	0.465424	0.0140665	FADS2;MMP14;CD82;WLS
mantle zone of r8BI	4/301	0.970229	0.999962	0	0	0.465424	0.0140665	TOP2A;CD164;SNCG;S100A10
mantle zone of r8BL	4/301	0.970229	0.999962	0	0	0.465424	0.0140665	TOP2A;TRIM28;NRG4;HLA-A
mantle zone of r8Ve	4/301	0.970229	0.999962	0	0	0.465424	0.0140665	IGFBP3;EBF3;A2M;YWHAZ
mantle zone of r9BI	4/301	0.970229	0.999962	0	0	0.465424	0.0140665	TOP2A;LGALS1;TXNIP;SNCG
mantle zone of r9BL	4/301	0.970229	0.999962	0	0	0.465424	0.0140665	TOP2A;NRG4;HMGA1;S100A4
mantle zone of r9BM	4/301	0.970229	0.999962	0	0	0.465424	0.0140665	TOP2A;LGALS1;SNCG;S100A10
medial part of r1B	4/301	0.970229	0.999962	0	0	0.465424	0.0140665	CSTB;DPYSL5;SDC2;AMPD3
medial part of r5B	4/301	0.970229	0.999962	0	0	0.465424	0.0140665	CSTB;RGS2;SPP1;HSPG2
medial part of r9B	4/301	0.970229	0.999962	0	0	0.465424	0.0140665	TOP2A;LGALS1;SNCG;S100A10
medial trapezoid nucleus	4/301	0.970229	0.999962	0	0	0.465424	0.0140665	TMEFF1;FCER1G;YWHAQ;HSPG2
nucleus of the central acoustic tract	4/301	0.970229	0.999962	0	0	0.465424	0.0140665	LGALS1;PRDX1;GPC2;MMP9
p1 part of the pararubral nucleus	4/301	0.970229	0.999962	0	0	0.465424	0.0140665	IFITM3;SPP1;SNCG;LSS
p1 part of the substantia nigra reticulata	4/301	0.970229	0.999962	0	0	0.465424	0.0140665	GRN;PABPC4;CXCL13;MMP9
p2 portion of the substantia nigra pars reticulata	4/301	0.970229	0.999962	0	0	0.465424	0.0140665	PABPC4;ALOX5AP;LAPTM5;CXCL13
paraterete nucleus	4/301	0.970229	0.999962	0	0	0.465424	0.0140665	GRN;PCSK1N;MARCKSL1;PABPC4
parietal cortex	4/301	0.970229	0.999962	0	0	0.465424	0.0140665	ENC1;TNRC18;PTN;DUSP6
parvicellular part of Lat	4/301	0.970229	0.999962	0	0	0.465424	0.0140665	TTR;CCL20;ITGB2;DBI
perilemniscal isthmic area	4/301	0.970229	0.999962	0	0	0.465424	0.0140665	CFL1;TNC;S100A6;NEUROG2
periventricular stratum of IC	4/301	0.970229	0.999962	0	0	0.465424	0.0140665	RPS8;PLXNA1;SNCG;AGRN
periventricular stratum of Ist	4/301	0.970229	0.999962	0	0	0.465424	0.0140665	RPS18;PLXNA1;RPS20;RPL37
periventricular stratum of r2Lim	4/301	0.970229	0.999962	0	0	0.465424	0.0140665	FADS2;CD82;IGFBP2;PLIN2
periventricular stratum of r3Co	4/301	0.970229	0.999962	0	0	0.465424	0.0140665	MMP14;CD82;IGFBP2;ITGB2
periventricular stratum of r6Co	4/301	0.970229	0.999962	0	0	0.465424	0.0140665	FADS2;MMP14;CD82;CCL20
polymorph layer of TuPal	4/301	0.970229	0.999962	0	0	0.465424	0.0140665	RGS2;TSC22D1;CXCL13;RPS13
pontomedullary hindbrain	4/301	0.970229	0.999962	0	0	0.465424	0.0140665	LGALS1;NRG4;SPP1;HSPG2
pregeniculate nucleus	4/301	0.970229	0.999962	0	0	0.465424	0.0140665	GPX1;RGS16;CD14;LSS
pretectum	4/301	0.970229	0.999962	0	0	0.465424	0.0140665	RGS16;LAPTM5;TNC;RPL24
pterigoid muscle trigeminal motor cell group	4/301	0.970229	0.999962	0	0	0.465424	0.0140665	ACLY;LGALS1;MSN;S100A10
pyramidal layer of taenia tecta	4/301	0.970229	0.999962	0	0	0.465424	0.0140665	FCER1G;GDF15;S100A4;NEUROG2
r1 part of vestibulocerebellar nucleus	4/301	0.970229	0.999962	0	0	0.465424	0.0140665	HNRNPA2B1;ITGB2;DBI;WLS
r10 part of basomedial reticular formation	4/301	0.970229	0.999962	0	0	0.465424	0.0140665	TOP2A;CSTB;LGALS1;YWHAZ
r10 part of gigantocellular reticular area	4/301	0.970229	0.999962	0	0	0.465424	0.0140665	TOP2A;CSTB;TSC22D1;TXNIP
r10 part of spinal vestibular nucleus	4/301	0.970229	0.999962	0	0	0.465424	0.0140665	MMP14;CD82;IGFBP3;UBA1
r10 part of the vestibular column	4/301	0.970229	0.999962	0	0	0.465424	0.0140665	GDF15;IGFBP3;PLIN2;UBA1
r11 part of spinal trigeminal nucleus, caudal part	4/301	0.970229	0.999962	0	0	0.465424	0.0140665	ACAP3;MMP14;TNRC18;ATP9A
r11 part of the trigeminal column	4/301	0.970229	0.999962	0	0	0.465424	0.0140665	ACAP3;MMP14;TNRC18;ATP9A
r2 liminal central gray	4/301	0.970229	0.999962	0	0	0.465424	0.0140665	FADS2;CD82;IGFBP2;PLIN2
r3 basal plate	4/301	0.970229	0.999962	0	0	0.465424	0.0140665	CSTB;SPP1;HMGA1;NEFL
r3 part of anteroventral cochlear nucleus	4/301	0.970229	0.999962	0	0	0.465424	0.0140665	RGS1;IGFBP2;PLIN2;WLS
r3 part of basomedial reticular formation	4/301	0.970229	0.999962	0	0	0.465424	0.0140665	CSTB;KIF5C;SPP1;SAT1
r3 part of dorsal cochlear nucleus	4/301	0.970229	0.999962	0	0	0.465424	0.0140665	MMP14;CD82;IGFBP2;ITGB2
r3 part of lateral pontine nuclei	4/301	0.970229	0.999962	0	0	0.465424	0.0140665	NRG4;SPP1;HLA-A;RPS13
r3 part of reticulotegmental nucleus, shell portion	4/301	0.970229	0.999962	0	0	0.465424	0.0140665	APC2;SPP1;HMGA1;YWHAZ
r3 roof plate	4/301	0.970229	0.999962	0	0	0.465424	0.0140665	IFITM3;IGFBP3;RPL27;AMPD3
r4 part of medial paralemniscal nucleus	4/301	0.970229	0.999962	0	0	0.465424	0.0140665	YWHAQ;SPP1;UBA1;YWHAZ
r4 part of ventral parvicellular reticular formation	4/301	0.970229	0.999962	0	0	0.465424	0.0140665	LGALS1;PRDX1;GPC2;MMP9
r5 part of posteroventral cochlear nucleus	4/301	0.970229	0.999962	0	0	0.465424	0.0140665	IFITM3;IGFBP3;RPL27;PLIN2
r5 part of ventral parvicellular reticular formation	4/301	0.970229	0.999962	0	0	0.465424	0.0140665	LGALS1;SPP1;GPC2;MMP9
r6 part of dorsal cochlear nucleus	4/301	0.970229	0.999962	0	0	0.465424	0.0140665	FADS2;MMP14;CD82;CCL20
r6 part of paragigantocellular nucleus	4/301	0.970229	0.999962	0	0	0.465424	0.0140665	SYT4;GDF15;IL1B;SNCG
r6 part of spinal trigeminal nucleus, pars oralis	4/301	0.970229	0.999962	0	0	0.465424	0.0140665	RPL18A;HNRNPA2B1;LAPTM5;FGFBP3
r7 part of cochlear column	4/301	0.970229	0.999962	0	0	0.465424	0.0140665	FADS2;MMP14;CD82;WLS
r7 part of trigeminal transition zone	4/301	0.970229	0.999962	0	0	0.465424	0.0140665	LGALS1;TAGLN2;LSS;EIF4B
r8 part of basolateral reticular formation	4/301	0.970229	0.999962	0	0	0.465424	0.0140665	TOP2A;TRIM28;NRG4;HLA-A
r8 part of spinal vestibular nucleus	4/301	0.970229	0.999962	0	0	0.465424	0.0140665	IGFBP3;EBF3;A2M;YWHAZ
r8 part of the paragigantocellular nucleus	4/301	0.970229	0.999962	0	0	0.465424	0.0140665	TOP2A;CD164;IGFBP3;S100A10
r8 part of the vestibular column	4/301	0.970229	0.999962	0	0	0.465424	0.0140665	IGFBP3;EBF3;A2M;YWHAZ
r8 portion of ambiguous motor nucleus	4/301	0.970229	0.999962	0	0	0.465424	0.0140665	TOP2A;LGALS1;EIF4B;IER3
r9 part of gigantocellular reticular area	4/301	0.970229	0.999962	0	0	0.465424	0.0140665	TOP2A;CSTB;GDF15;SNCG
r9 part of the basolateral reticular formation	4/301	0.970229	0.999962	0	0	0.465424	0.0140665	TOP2A;NRG4;HMGA1;S100A4
reticular formation of CoPD	4/301	0.970229	0.999962	0	0	0.465424	0.0140665	RPL18A;UBN2;LAPTM5;CTNNB1
reticular formation of CoPL	4/301	0.970229	0.999962	0	0	0.465424	0.0140665	LAPTM5;TNC;RPL27;YWHAG
reticular formation of basal m2	4/301	0.970229	0.999962	0	0	0.465424	0.0140665	RPL12;PLXNA1;EBF3;YWHAZ
retrosplenial cortex	4/301	0.970229	0.999962	0	0	0.465424	0.0140665	CHL1;HMGCR;NR3C1;GLTSCR2
rhombomere 10	4/301	0.970229	0.999962	0	0	0.465424	0.0140665	TOP2A;LGALS1;MSN;A2M
rhombomere 3	4/301	0.970229	0.999962	0	0	0.465424	0.0140665	CSTB;SPP1;HMGA1;NEFL
rhombomere 5	4/301	0.970229	0.999962	0	0	0.465424	0.0140665	LGALS1;TTR;SPP1;HSPG2
rhombomere 6	4/301	0.970229	0.999962	0	0	0.465424	0.0140665	SYT4;NRG4;MSN;S100A10
septostriatal part of the olfactory tuberculum	4/301	0.970229	0.999962	0	0	0.465424	0.0140665	GRN;GDF15;NRG4;TNRC18
subbrachial nucleus, caudal part	4/301	0.970229	0.999962	0	0	0.465424	0.0140665	GRN;RPL37;CD14;YWHAZ
sublayer 6b of InsCx	4/301	0.970229	0.999962	0	0	0.465424	0.0140665	TMEFF1;ACAP3;FASN;COL6A1
submammillothalamic nucleus	4/301	0.970229	0.999962	0	0	0.465424	0.0140665	IL1RN;FCER1G;RGS1;S100A6
subthalamic nucleus (migrated)	4/301	0.970229	0.999962	0	0	0.465424	0.0140665	RAB31;GNG2;TMBIM6;DCLK1
superficial layers of TG	4/301	0.970229	0.999962	0	0	0.465424	0.0140665	IFITM3;MMP14;GDF15;RPL27
superficial stratum of AOD	4/301	0.970229	0.999962	0	0	0.465424	0.0140665	IL1RN;GDF15;DCX;SOX11
superficial stratum of Mam	4/301	0.970229	0.999962	0	0	0.465424	0.0140665	PABPC4;RPL12;CXCL13;RPS13
superficial stratum of PCx (cortical plate/marginal zone)	4/301	0.970229	0.999962	0	0	0.465424	0.0140665	ENC1;TNRC18;PTN;DUSP6
superficial stratum of PHyB-V	4/301	0.970229	0.999962	0	0	0.465424	0.0140665	GRN;PCSK1N;MARCKSL1;PABPC4
superficial stratum of PcPV	4/301	0.970229	0.999962	0	0	0.465424	0.0140665	SPARC;PKIA;RGS16;ITGB2
superficial stratum of SeDg	4/301	0.970229	0.999962	0	0	0.465424	0.0140665	NRG4;COL6A1;TIMP1;SMARCA4
superficial stratum of SeStr	4/301	0.970229	0.999962	0	0	0.465424	0.0140665	GRN;GDF15;NRG4;TNRC18
superficial stratum of TG	4/301	0.970229	0.999962	0	0	0.465424	0.0140665	IFITM3;MMP14;GDF15;RPL27
superficial stratum of THyB-D	4/301	0.970229	0.999962	0	0	0.465424	0.0140665	IFITM3;VAT1;TRIM28;CXCL13
superficial stratum of THyB-V	4/301	0.970229	0.999962	0	0	0.465424	0.0140665	IFITM3;FCER1G;TRIM28;RPL12
superficial stratum of TTe	4/301	0.970229	0.999962	0	0	0.465424	0.0140665	FCER1G;GDF15;S100A4;NEUROG2
superficial stratum of m1B	4/301	0.970229	0.999962	0	0	0.465424	0.0140665	IFITM3;SDC2;SNCG;LSS
superficial stratum of p2B	4/301	0.970229	0.999962	0	0	0.465424	0.0140665	IFITM3;SDC2;PABPC4;CXCL13
superficial stratum of p3B	4/301	0.970229	0.999962	0	0	0.465424	0.0140665	MMP14;RGS1;PABPC4;CXCL13
superficial stratum of p3ZL	4/301	0.970229	0.999962	0	0	0.465424	0.0140665	GPX1;RGS16;CD14;LSS
superficial stratum of r10BM	4/301	0.970229	0.999962	0	0	0.465424	0.0140665	TOP2A;TRIM28;DPYSL5;SMARCA4
superficial stratum of r11Tr	4/301	0.970229	0.999962	0	0	0.465424	0.0140665	ACAP3;MMP14;TNRC18;ATP9A
superficial stratum of r3BI	4/301	0.970229	0.999962	0	0	0.465424	0.0140665	NRG4;SPP1;HLA-A;RPS13
superficial stratum of r3Co	4/301	0.970229	0.999962	0	0	0.465424	0.0140665	RGS1;IGFBP2;PLIN2;WLS
superficial stratum of r4BL	4/301	0.970229	0.999962	0	0	0.465424	0.0140665	NRG4;SPP1;RPL37;YWHAZ
superficial stratum of r5BM	4/301	0.970229	0.999962	0	0	0.465424	0.0140665	TMEFF1;FCER1G;YWHAQ;HSPG2
superficial stratum of r5Co	4/301	0.970229	0.999962	0	0	0.465424	0.0140665	IFITM3;IGFBP3;RPL27;PLIN2
superficial stratum of r6Tr	4/301	0.970229	0.999962	0	0	0.465424	0.0140665	RPL18A;HNRNPA2B1;LAPTM5;FGFBP3
superficial stratum of r8BI	4/301	0.970229	0.999962	0	0	0.465424	0.0140665	TOP2A;CD164;IGFBP3;S100A10
superficial stratum of r8Lim	4/301	0.970229	0.999962	0	0	0.465424	0.0140665	TOP2A;LGALS1;EIF4B;IER3
temporal muscle trigeminal motor cell group	4/301	0.970229	0.999962	0	0	0.465424	0.0140665	LGALS1;MSN;MMP9;AP2M1
ventral part of JcP	4/301	0.970229	0.999962	0	0	0.465424	0.0140665	TNC;MRFAP1;ATP5G3;PRDX6
ventral part of PcP	4/301	0.970229	0.999962	0	0	0.465424	0.0140665	RIMS3;RGS16;TNC;RPL24
ventral subnucleus of MG	4/301	0.970229	0.999962	0	0	0.465424	0.0140665	RPL18A;PKIA;RGS16;RPL11
ventral tuberomammillary nucleus, superficial part (histaminergic)	4/301	0.970229	0.999962	0	0	0.465424	0.0140665	IFITM3;FCER1G;TRIM28;RPL12
ventrolateral periolivary nucleus	4/301	0.970229	0.999962	0	0	0.465424	0.0140665	LGALS1;NRG4;RPL12;GPC2
ventropallial prepiriform area	4/301	0.970229	0.999962	0	0	0.465424	0.0140665	ACTR2;TYROBP;PTN;HMGCR
superficial stratum of DG	10/601	0.973868	0.999962	0	0	0.582058	0.0154126	RPS7;PKIA;PABPC4;RPL22;STMN3;ISLR2;CXCL13;PFN1;RPS13;XPR1
Nucleus of the lateral olfactory tract	5/373	0.979718	0.999962	0	0	0.468639	0.00960275	ACAP3;MARCKSL1;RPL21;CXCL13;AP2M1
Lateral mammillary nucleus	5/384	0.983574	0.999962	0	0	0.454775	0.00753218	PABPC4;RPL12;TIMP1;CXCL13;RPS13
Paracentral nucleus	4/353	0.989725	0.999962	0	0	0.395002	0.0040796	RIMS3;RGS16;L1CAM;NR3C1
Anterior cingulate area, dorsal part	3/301	0.990993	0.999962	0	0	0.347252	0.00314189	S100A6;KIF21B;DUSP6
Anterior cingulate area, ventral part, layer 2/3	3/301	0.990993	0.999962	0	0	0.347252	0.00314189	SQLE;S100A6;DUSP6
Anterior olfactory nucleus, dorsal part	3/301	0.990993	0.999962	0	0	0.347252	0.00314189	IL1RN;GDF15;SOX11
Basolateral amygdalar nucleus	3/301	0.990993	0.999962	0	0	0.347252	0.00314189	NR2F1;PLAUR;AP2M1
Cortical amygdalar area, anterior part, layer 1	3/301	0.990993	0.999962	0	0	0.347252	0.00314189	MARCKSL1;TRIM28;PRPH
Ectorhinal area/Layer 5	3/301	0.990993	0.999962	0	0	0.347252	0.00314189	YWHAB;PLIN2;RPS27A
Ectorhinal area/Layer 6a	3/301	0.990993	0.999962	0	0	0.347252	0.00314189	PLAUR;PLIN2;NR3C1
Entorhinal area, medial part, ventral zone	3/301	0.990993	0.999962	0	0	0.347252	0.00314189	FOXG1;PKIA;CXCL13
Field CA2, stratum pyramidale	3/301	0.990993	0.999962	0	0	0.347252	0.00314189	FOXG1;PLXNA1;PFN1
Frontal pole, cerebral cortex	3/301	0.990993	0.999962	0	0	0.347252	0.00314189	IFITM3;IL1RN;SOX4
Geniculate group, ventral thalamus	3/301	0.990993	0.999962	0	0	0.347252	0.00314189	YWHAQ;RGS16;LSS
Gigantocellular reticular nucleus	3/301	0.990993	0.999962	0	0	0.347252	0.00314189	CSTB;GDF15;SNCG
Granular lamina of the cochlear nuclei	3/301	0.990993	0.999962	0	0	0.347252	0.00314189	CCL20;IGFBP2;WLS
Gustatory areas, layer 1	3/301	0.990993	0.999962	0	0	0.347252	0.00314189	TREM2;B2M;YWHAZ
Gustatory areas, layer 4	3/301	0.990993	0.999962	0	0	0.347252	0.00314189	TYROBP;PLAUR;PTN
Inferior colliculus, dorsal nucleus	3/301	0.990993	0.999962	0	0	0.347252	0.00314189	CRABP1;NEUROG2;SMARCA4
Inferior salivatory nucleus	3/301	0.990993	0.999962	0	0	0.347252	0.00314189	YWHAQ;RPL37;AP2M1
Intermediate reticular nucleus	3/301	0.990993	0.999962	0	0	0.347252	0.00314189	TAGLN2;AGRN;EIF4B
Interposed nucleus	3/301	0.990993	0.999962	0	0	0.347252	0.00314189	TTR;ITGB2;DBI
Lateral posterior nucleus of the thalamus	3/301	0.990993	0.999962	0	0	0.347252	0.00314189	NGRN;RGS16;TNC
Linear nucleus of the medulla	3/301	0.990993	0.999962	0	0	0.347252	0.00314189	SOX11;EIF4B;ZMPSTE24
Medial geniculate complex, dorsal part	3/301	0.990993	0.999962	0	0	0.347252	0.00314189	RPL18A;RGS16;FGFBP3
Medullary reticular nucleus, dorsal part	3/301	0.990993	0.999962	0	0	0.347252	0.00314189	FTH1;YWHAZ;EIF4B
Medullary reticular nucleus, ventral part	3/301	0.990993	0.999962	0	0	0.347252	0.00314189	TOP2A;LGALS1;S100A4
Midbrain reticular nucleus, retrorubral area	3/301	0.990993	0.999962	0	0	0.347252	0.00314189	SNCG;RPS20;AP2M1
Midbrain, motor related	3/301	0.990993	0.999962	0	0	0.347252	0.00314189	RPS8;SNCG;EBF3
Midbrain, sensory related	3/301	0.990993	0.999962	0	0	0.347252	0.00314189	S100A6;UBA1;SMARCA4
Motor nucleus of trigeminal	3/301	0.990993	0.999962	0	0	0.347252	0.00314189	LGALS1;MSN;S100A10
Nucleus of the trapezoid body	3/301	0.990993	0.999962	0	0	0.347252	0.00314189	TMEFF1;RGS1;HSPG2
Olfactory tubercle, polymorph layer	3/301	0.990993	0.999962	0	0	0.347252	0.00314189	TSC22D1;YBX1;CXCL13
Paraflocculus	3/301	0.990993	0.999962	0	0	0.347252	0.00314189	BTG1;LCP1;ZFP36L1
Paragigantocellular reticular nucleus, dorsal part	3/301	0.990993	0.999962	0	0	0.347252	0.00314189	CSTB;SYT4;SPP1
Piriform area, molecular layer	3/301	0.990993	0.999962	0	0	0.347252	0.00314189	TYROBP;STMN2;PTN
Piriform-amygdalar area, molecular layer	3/301	0.990993	0.999962	0	0	0.347252	0.00314189	MARCKSL1;TYROBP;RPS13
Pons	3/301	0.990993	0.999962	0	0	0.347252	0.00314189	CSTB;SPP1;HSPG2
Pons, motor related	3/301	0.990993	0.999962	0	0	0.347252	0.00314189	CSTB;SPP1;HMGA1
Pontine gray	3/301	0.990993	0.999962	0	0	0.347252	0.00314189	SLC20A1;SPP1;TIMP1
Posterior limiting nucleus of the thalamus	3/301	0.990993	0.999962	0	0	0.347252	0.00314189	RIMS3;RPL21;RGS16
Postsubiculum, layer 2	3/301	0.990993	0.999962	0	0	0.347252	0.00314189	IFITM3;GDF15;TRIB2
Prelimbic area, layer 5	3/301	0.990993	0.999962	0	0	0.347252	0.00314189	IL1RN;YWHAB;PPT1
Presubiculum, layer 2	3/301	0.990993	0.999962	0	0	0.347252	0.00314189	CHL1;GDF15;TRIB2
Primary motor area, Layer 1	3/301	0.990993	0.999962	0	0	0.347252	0.00314189	TRIM28;ENC1;CELF5
Primary somatosensory area, lower limb	3/301	0.990993	0.999962	0	0	0.347252	0.00314189	FOXG1;HMGCR;DUSP6
Primary somatosensory area, mouth	3/301	0.990993	0.999962	0	0	0.347252	0.00314189	TYROBP;PLAUR;ACTN4
Primary somatosensory area, trunk, layer 2/3	3/301	0.990993	0.999962	0	0	0.347252	0.00314189	ENC1;TNRC18;DUSP6
Primary somatosensory area, unassigned, layer 5	3/301	0.990993	0.999962	0	0	0.347252	0.00314189	LASP1;TYROBP;PTN
Primary somatosensory area, upper limb, layer 1	3/301	0.990993	0.999962	0	0	0.347252	0.00314189	TRIM28;TREM2;HLA-A
Primary somatosensory area, upper limb, layer 2/3	3/301	0.990993	0.999962	0	0	0.347252	0.00314189	ENC1;TNRC18;HLA-A
Primary somatosensory area, upper limb, layer 4	3/301	0.990993	0.999962	0	0	0.347252	0.00314189	TNRC18;HLA-A;PTN
Principal sensory nucleus of the trigeminal	3/301	0.990993	0.999962	0	0	0.347252	0.00314189	LGALS1;TXNIP;LSS
Retrosplenial area, dorsal part, layer 1	3/301	0.990993	0.999962	0	0	0.347252	0.00314189	GPX1;CRABP1;SMARCA4
Retrosplenial area, dorsal part, layer 2/3	3/301	0.990993	0.999962	0	0	0.347252	0.00314189	CRABP1;DUSP6;SMARCA4
Retrosplenial area, ventral part, layer 1	3/301	0.990993	0.999962	0	0	0.347252	0.00314189	MMP14;GPX1;SMARCA4
Retrosplenial area, ventral part, layer 2	3/301	0.990993	0.999962	0	0	0.347252	0.00314189	MMP14;IL1B;SMARCA4
Retrosplenial area, ventral part, layer 2/3	3/301	0.990993	0.999962	0	0	0.347252	0.00314189	MMP14;IL1B;SMARCA4
Retrosplenial area, ventral part, layer 6a	3/301	0.990993	0.999962	0	0	0.347252	0.00314189	MYO5A;S100A4;SAT1
Secondary motor area	3/301	0.990993	0.999962	0	0	0.347252	0.00314189	TYROBP;SH3BGRL3;SMARCA4
Secondary motor area, layer 1	3/301	0.990993	0.999962	0	0	0.347252	0.00314189	ENC1;UBA1;SMARCA4
Striatum ventral region	3/301	0.990993	0.999962	0	0	0.347252	0.00314189	RGS2;ALCAM;COL6A1
Subiculum, ventral part, stratum radiatum	3/301	0.990993	0.999962	0	0	0.347252	0.00314189	CHL1;FOXG1;IGFBP3
Superior colliculus, motor related, intermediate gray layer, sublayer a	3/301	0.990993	0.999962	0	0	0.347252	0.00314189	IGFBP3;LAPTM5;RPL27
Supramammillary nucleus	3/301	0.990993	0.999962	0	0	0.347252	0.00314189	RGS1;DNER;CXCL13
Tuberomammillary nucleus, ventral part	3/301	0.990993	0.999962	0	0	0.347252	0.00314189	TRIM28;RPL12;CXCL13
abducens motor nucleus	3/301	0.990993	0.999962	0	0	0.347252	0.00314189	CSTB;LGALS1;GDF15
alar part of terminal hypothalamus	3/301	0.990993	0.999962	0	0	0.347252	0.00314189	IFITM3;PEG10;CXCL13
anterior cortical amygdaloid area	3/301	0.990993	0.999962	0	0	0.347252	0.00314189	MARCKSL1;TRIM28;PRPH
dorsal lateral geniculate nucleus	3/301	0.990993	0.999962	0	0	0.347252	0.00314189	RGS16;HNRNPC;CLASP2
dorsal nucleus of the lateral lemniscus	3/301	0.990993	0.999962	0	0	0.347252	0.00314189	CFL1;TNC;S100A6
dorsal terminal nucleus of the accessory optic tract	3/301	0.990993	0.999962	0	0	0.347252	0.00314189	RPL18A;PKIA;ISLR2
episupraoptic nucleus	3/301	0.990993	0.999962	0	0	0.347252	0.00314189	IL1B;S100A6;CXCL13
external cortical nucleus of inferior colliculus	3/301	0.990993	0.999962	0	0	0.347252	0.00314189	IFITM3;S100A6;PLIN2
intermediate part of isB	3/301	0.990993	0.999962	0	0	0.347252	0.00314189	RPL12;SNCG;CXCL13
intermediate part of r2B	3/301	0.990993	0.999962	0	0	0.347252	0.00314189	CSTB;SPP1;AGRN
intermediate stratum of 5BL	3/301	0.990993	0.999962	0	0	0.347252	0.00314189	RPL12;SPP1;MMP9
intermediate stratum of CoPD	3/301	0.990993	0.999962	0	0	0.347252	0.00314189	PKIA;RPL27;PRRC2A
intermediate stratum of Ist	3/301	0.990993	0.999962	0	0	0.347252	0.00314189	CFL1;TNC;S100A6
intermediate stratum of JcPV	3/301	0.990993	0.999962	0	0	0.347252	0.00314189	TNC;NSG1;ATP5G3
intermediate stratum of m1B	3/301	0.990993	0.999962	0	0	0.347252	0.00314189	ACLY;SPP1;SNCG
intermediate stratum of m2Lim	3/301	0.990993	0.999962	0	0	0.347252	0.00314189	ITGB2;CD14;TIMP1
intermediate stratum of r10BM	3/301	0.990993	0.999962	0	0	0.347252	0.00314189	TOP2A;CSTB;LGALS1
intermediate stratum of r10Tr	3/301	0.990993	0.999962	0	0	0.347252	0.00314189	APC2;HMGA1;YWHAZ
intermediate stratum of r2Ve	3/301	0.990993	0.999962	0	0	0.347252	0.00314189	LGALS1;SPP1;INHBA
intermediate stratum of r3BI	3/301	0.990993	0.999962	0	0	0.347252	0.00314189	SPP1;AGRN;AP2M1
intermediate stratum of r3BM	3/301	0.990993	0.999962	0	0	0.347252	0.00314189	CSTB;SPP1;HMGA1
intermediate stratum of r4BM	3/301	0.990993	0.999962	0	0	0.347252	0.00314189	CSTB;SPP1;ZMPSTE24
intermediate stratum of r6BI	3/301	0.990993	0.999962	0	0	0.347252	0.00314189	SYT4;SNCG;AMPD3
intermediate stratum of r6BM	3/301	0.990993	0.999962	0	0	0.347252	0.00314189	CSTB;SYT4;RGS2
intermediate stratum of r7BI	3/301	0.990993	0.999962	0	0	0.347252	0.00314189	SNCG;AMPD3;FGFBP3
intermediate stratum of r7BM	3/301	0.990993	0.999962	0	0	0.347252	0.00314189	CSTB;RGS2;SNCG
intermediate stratum of r7Tr	3/301	0.990993	0.999962	0	0	0.347252	0.00314189	SOX11;TAGLN2;EIF4B
intermediate stratum of r8BM	3/301	0.990993	0.999962	0	0	0.347252	0.00314189	TOP2A;CSTB;SNCG
intermediate stratum of r8Lim	3/301	0.990993	0.999962	0	0	0.347252	0.00314189	ACLY;LGALS1;EIF4B
intermediate stratum of r8Tr	3/301	0.990993	0.999962	0	0	0.347252	0.00314189	SOX11;EIF4B;ZMPSTE24
intermediate stratum of r9BI	3/301	0.990993	0.999962	0	0	0.347252	0.00314189	TOP2A;TXNIP;SNCG
intermediate stratum of r9BM	3/301	0.990993	0.999962	0	0	0.347252	0.00314189	TOP2A;GDF15;SNCG
intermediate stratum of r9Tr	3/301	0.990993	0.999962	0	0	0.347252	0.00314189	YWHAZ;EIF4B;ZMPSTE24
intermediate white layer of SC	3/301	0.990993	0.999962	0	0	0.347252	0.00314189	CDH13;RPL27;MAP4K4
isthmus proper	3/301	0.990993	0.999962	0	0	0.347252	0.00314189	TNC;S100A6;RPS20
lateral part of m2A	3/301	0.990993	0.999962	0	0	0.347252	0.00314189	RPS8;PLXNA1;EBF3
lateral part of r7B	3/301	0.990993	0.999962	0	0	0.347252	0.00314189	NRG4;ZMPSTE24;S100A10
lateral trapezoid nucleus	3/301	0.990993	0.999962	0	0	0.347252	0.00314189	SLC38A1;YWHAQ;HSPG2
layer 1 of CCx	3/301	0.990993	0.999962	0	0	0.347252	0.00314189	MMP14;GDF15;SMARCA4
layer 1 of FCx	3/301	0.990993	0.999962	0	0	0.347252	0.00314189	IL1RN;LAPTM5;NEUROG2
layer 1 of InsCx	3/301	0.990993	0.999962	0	0	0.347252	0.00314189	LAPTM5;PLAUR;TREM2
layer 1 of LPrP cortex	3/301	0.990993	0.999962	0	0	0.347252	0.00314189	TYROBP;LAPTM5;PTN
layer 1 of RSC	3/301	0.990993	0.999962	0	0	0.347252	0.00314189	PLIN2;NR3C1;GLTSCR2
layer 2 of CCx	3/301	0.990993	0.999962	0	0	0.347252	0.00314189	IFITM3;MMP14;GDF15
layer 2 of FCx	3/301	0.990993	0.999962	0	0	0.347252	0.00314189	IL1RN;LAPTM5;NEUROG2
layer 2 of InsCx	3/301	0.990993	0.999962	0	0	0.347252	0.00314189	ACTR2;LAPTM5;PLAUR
layer 2 of LPrP cortex	3/301	0.990993	0.999962	0	0	0.347252	0.00314189	ACTR2;TYROBP;PTN
layer 2 of PCx	3/301	0.990993	0.999962	0	0	0.347252	0.00314189	ENC1;CELF5;DUSP6
layer 3 of PCx	3/301	0.990993	0.999962	0	0	0.347252	0.00314189	ENC1;TNRC18;DUSP6
layer 3 of PaS	3/301	0.990993	0.999962	0	0	0.347252	0.00314189	NR3C1;TRIB2;VAMP2
layer 3 of RSC	3/301	0.990993	0.999962	0	0	0.347252	0.00314189	TRIO;CHL1;NR2F1
layer 4 of PCx	3/301	0.990993	0.999962	0	0	0.347252	0.00314189	LASP1;TNRC18;PTN
layer 5 of CCx	3/301	0.990993	0.999962	0	0	0.347252	0.00314189	TMEFF1;PPT1;SEPT3
layer 5 of ERCx	3/301	0.990993	0.999962	0	0	0.347252	0.00314189	DNAJA1;CDH2;PLIN2
layer 5 of PaS	3/301	0.990993	0.999962	0	0	0.347252	0.00314189	CAP1;NR3C1;TRIB2
liminal part of alar p1	3/301	0.990993	0.999962	0	0	0.347252	0.00314189	TNC;RPL24;EBF3
liminal part of the r8 alar plate	3/301	0.990993	0.999962	0	0	0.347252	0.00314189	ACLY;LGALS1;EIF4B
magnocellular superficial hypothalamic nucleus	3/301	0.990993	0.999962	0	0	0.347252	0.00314189	GRN;PEG10;ALOX5AP
mantle zone of Ist	3/301	0.990993	0.999962	0	0	0.347252	0.00314189	TNC;S100A6;RPS20
mantle zone of Pal	3/301	0.990993	0.999962	0	0	0.347252	0.00314189	RGS2;CRABP1;CXCL13
mantle zone of S	3/301	0.990993	0.999962	0	0	0.347252	0.00314189	TMEFF1;YWHAB;NR3C1
mantle zone of TG	3/301	0.990993	0.999962	0	0	0.347252	0.00314189	TRIM28;GDF15;RPL27
mantle zone of VTTh	3/301	0.990993	0.999962	0	0	0.347252	0.00314189	RIMS3;RGS16;LSS
mantle zone of isBI	3/301	0.990993	0.999962	0	0	0.347252	0.00314189	RPL12;SNCG;CXCL13
mantle zone of m2AL	3/301	0.990993	0.999962	0	0	0.347252	0.00314189	RPS8;PLXNA1;EBF3
mantle zone of p1Lim	3/301	0.990993	0.999962	0	0	0.347252	0.00314189	TNC;RPL24;EBF3
mantle zone of r10BM	3/301	0.990993	0.999962	0	0	0.347252	0.00314189	TOP2A;LGALS1;TRIM28
mantle zone of r2BI	3/301	0.990993	0.999962	0	0	0.347252	0.00314189	CSTB;SPP1;AGRN
mantle zone of r2BM	3/301	0.990993	0.999962	0	0	0.347252	0.00314189	CSTB;SPP1;AMPD3
mantle zone of r2Tr	3/301	0.990993	0.999962	0	0	0.347252	0.00314189	LGALS1;SPP1;LSS
mantle zone of r2Ve	3/301	0.990993	0.999962	0	0	0.347252	0.00314189	LGALS1;SPP1;INHBA
mantle zone of r3Co	3/301	0.990993	0.999962	0	0	0.347252	0.00314189	RGS1;IGFBP2;WLS
mantle zone of r4BI	3/301	0.990993	0.999962	0	0	0.347252	0.00314189	SPP1;AGRN;MMP9
mantle zone of r4BM	3/301	0.990993	0.999962	0	0	0.347252	0.00314189	SLC20A1;STXBP1;SPP1
mantle zone of r5Ve	3/301	0.990993	0.999962	0	0	0.347252	0.00314189	TTR;IGFBP2;SOX11
mantle zone of r6BM	3/301	0.990993	0.999962	0	0	0.347252	0.00314189	CSTB;SYT4;RGS2
mantle zone of r6Ve	3/301	0.990993	0.999962	0	0	0.347252	0.00314189	TTR;ITGB2;SOX11
mantle zone of r7BL	3/301	0.990993	0.999962	0	0	0.347252	0.00314189	NRG4;ZMPSTE24;S100A10
mantle zone of r7BM	3/301	0.990993	0.999962	0	0	0.347252	0.00314189	CSTB;RGS1;SNCG
mantle zone of r8BM	3/301	0.990993	0.999962	0	0	0.347252	0.00314189	TOP2A;SNCG;S100A10
mantle zone of r8Lim	3/301	0.990993	0.999962	0	0	0.347252	0.00314189	ACLY;LGALS1;EIF4B
mantle zone of the IG	3/301	0.990993	0.999962	0	0	0.347252	0.00314189	S100A4;HSPG2;NEUROG2
medial basal reticular formation of m1	3/301	0.990993	0.999962	0	0	0.347252	0.00314189	IL1B;PNOC;EBF3
medial part of r10B	3/301	0.990993	0.999962	0	0	0.347252	0.00314189	TOP2A;LGALS1;TRIM28
medial part of r2B	3/301	0.990993	0.999962	0	0	0.347252	0.00314189	CSTB;SPP1;AMPD3
medial part of r4B	3/301	0.990993	0.999962	0	0	0.347252	0.00314189	SLC20A1;STXBP1;SPP1
medial part of r6B	3/301	0.990993	0.999962	0	0	0.347252	0.00314189	CSTB;SYT4;RGS2
medial part of r7B	3/301	0.990993	0.999962	0	0	0.347252	0.00314189	CSTB;RGS1;SNCG
medial part of r8B	3/301	0.990993	0.999962	0	0	0.347252	0.00314189	TOP2A;SNCG;S100A10
medial pretectal nucleus	3/301	0.990993	0.999962	0	0	0.347252	0.00314189	IFITM3;RPL27;PRDX6
microcellular tegmental nucleus	3/301	0.990993	0.999962	0	0	0.347252	0.00314189	MMP14;GRN;ITGB2
navicular nucleus	3/301	0.990993	0.999962	0	0	0.347252	0.00314189	GDF15;FTH1;INHBA
pallidal islands of Calleja	3/301	0.990993	0.999962	0	0	0.347252	0.00314189	PABPC4;CXCL13;RPS13
pallidum (globus pallidus complex)	3/301	0.990993	0.999962	0	0	0.347252	0.00314189	RGS2;CRABP1;CXCL13
parvocellular part of the r9LRt	3/301	0.990993	0.999962	0	0	0.347252	0.00314189	TOP2A;NRG4;TIMP1
periventricular stratum of r1Ve	3/301	0.990993	0.999962	0	0	0.347252	0.00314189	TTR;ITGB2;DBI
periventricular stratum of r3Ve	3/301	0.990993	0.999962	0	0	0.347252	0.00314189	TTR;IGFBP2;INHBA
periventricular stratum of r4Co	3/301	0.990993	0.999962	0	0	0.347252	0.00314189	MMP14;TTR;LCP1
periventricular stratum of r5BM	3/301	0.990993	0.999962	0	0	0.347252	0.00314189	CSTB;LGALS1;GDF15
periventricular stratum of r5Co	3/301	0.990993	0.999962	0	0	0.347252	0.00314189	MMP14;CCL20;WLS
periventricular stratum of r7Ve	3/301	0.990993	0.999962	0	0	0.347252	0.00314189	ITGB2;INHBA;A2M
plexiform layer of TuStr	3/301	0.990993	0.999962	0	0	0.347252	0.00314189	TNRC18;YBX1;RPS13
pontine hindbrain	3/301	0.990993	0.999962	0	0	0.347252	0.00314189	CSTB;SPP1;HMGA1
pyramidal layer of IG	3/301	0.990993	0.999962	0	0	0.347252	0.00314189	S100A4;HSPG2;NEUROG2
r1 part of intermediate nucleus of the lateral lemniscus	3/301	0.990993	0.999962	0	0	0.347252	0.00314189	IL1RN;IGFBP3;CD14
r1 part of principal trigeminal sensory nucleus	3/301	0.990993	0.999962	0	0	0.347252	0.00314189	LGALS1;SAT1;NEUROG2
r1 part of vestibular nucleus Y	3/301	0.990993	0.999962	0	0	0.347252	0.00314189	TTR;ITGB2;DBI
r10 part of dorsal parvicellular reticular formation	3/301	0.990993	0.999962	0	0	0.347252	0.00314189	APC2;HMGA1;YWHAZ
r10 part of spinal trigeminal nucleus, caudal part	3/301	0.990993	0.999962	0	0	0.347252	0.00314189	EBF3;TNRC18;ATP9A
r10 part of the inferior olive	3/301	0.990993	0.999962	0	0	0.347252	0.00314189	TOP2A;TRIM28;DPYSL5
r2 alar plate	3/301	0.990993	0.999962	0	0	0.347252	0.00314189	LGALS1;SPP1;LSS
r2 part of basolateral reticular formation	3/301	0.990993	0.999962	0	0	0.347252	0.00314189	VAT1;SNCG;S100A10
r2 part of basomedial reticular formation	3/301	0.990993	0.999962	0	0	0.347252	0.00314189	CSTB;SPP1;AP2M1
r2 part of superior vestibular nucleus	3/301	0.990993	0.999962	0	0	0.347252	0.00314189	LGALS1;SPP1;INHBA
r2 part of trigeminal sensory column	3/301	0.990993	0.999962	0	0	0.347252	0.00314189	LGALS1;SPP1;LSS
r2 part of vestibular sensory column	3/301	0.990993	0.999962	0	0	0.347252	0.00314189	LGALS1;SPP1;INHBA
r3 part of basointermediate reticular formation	3/301	0.990993	0.999962	0	0	0.347252	0.00314189	SPP1;AGRN;AP2M1
r3 part of cochlear sensory column	3/301	0.990993	0.999962	0	0	0.347252	0.00314189	RGS1;IGFBP2;WLS
r3 part of parvicellular medial vestibular nucleus	3/301	0.990993	0.999962	0	0	0.347252	0.00314189	TTR;IGFBP2;INHBA
r3 part of ventral lateral lemniscal nucleus	3/301	0.990993	0.999962	0	0	0.347252	0.00314189	TOP2A;NRG4;SPP1
r4 part of dorsal cochlear nucleus	3/301	0.990993	0.999962	0	0	0.347252	0.00314189	MMP14;TTR;LCP1
r4 part of lateral pontine nuclei	3/301	0.990993	0.999962	0	0	0.347252	0.00314189	NRG4;INA;RPS13
r4 part of medial pontine nuclei	3/301	0.990993	0.999962	0	0	0.347252	0.00314189	SLC20A1;SPP1;YWHAZ
r4 part of pontine raphe cell population	3/301	0.990993	0.999962	0	0	0.347252	0.00314189	CSTB;SPP1;ZMPSTE24
r4 part of ventral lateral lemniscal nucleus	3/301	0.990993	0.999962	0	0	0.347252	0.00314189	NRG4;SPP1;RPL37
r5 alar plate	3/301	0.990993	0.999962	0	0	0.347252	0.00314189	LGALS1;TTR;HNRNPA2B1
r5 part of basolateral reticular formation	3/301	0.990993	0.999962	0	0	0.347252	0.00314189	RPL12;SPP1;MMP9
r5 part of basomedial reticular formation	3/301	0.990993	0.999962	0	0	0.347252	0.00314189	CSTB;SPP1;HSPG2
r5 part of dorsal cochlear nucleus	3/301	0.990993	0.999962	0	0	0.347252	0.00314189	MMP14;CCL20;WLS
r5 part of the vestibular column	3/301	0.990993	0.999962	0	0	0.347252	0.00314189	TTR;IGFBP2;SOX11
r6 part of basointermediate reticular formation	3/301	0.990993	0.999962	0	0	0.347252	0.00314189	SYT4;SNCG;AMPD3
r6 part of basomedial reticular formation	3/301	0.990993	0.999962	0	0	0.347252	0.00314189	CSTB;SYT4;SPP1
r6 part of gigantocellular reticular area	3/301	0.990993	0.999962	0	0	0.347252	0.00314189	CSTB;SYT4;RGS2
r6 part of posteroventral cochlear nucleus	3/301	0.990993	0.999962	0	0	0.347252	0.00314189	CCL20;LCP1;WLS
r6 part of rostral ventromedial reticular area	3/301	0.990993	0.999962	0	0	0.347252	0.00314189	NRG4;IL1B;S100A10
r6 part of the vestibular column	3/301	0.990993	0.999962	0	0	0.347252	0.00314189	TTR;ITGB2;SOX11
r6 part of ventral gigangocellular reticular area	3/301	0.990993	0.999962	0	0	0.347252	0.00314189	RGS2;IL1B;SNCG
r7 alar plate	3/301	0.990993	0.999962	0	0	0.347252	0.00314189	ACLY;TAGLN2;EIF4B
r7 part of dorsal parvicellular reticular formation	3/301	0.990993	0.999962	0	0	0.347252	0.00314189	SOX11;EIF4B;ZMPSTE24
r7 part of gigantocellular reticular area	3/301	0.990993	0.999962	0	0	0.347252	0.00314189	CSTB;RGS2;SNCG
r7 part of paragigantocellular nucleus	3/301	0.990993	0.999962	0	0	0.347252	0.00314189	FCER1G;SNCG;S100A10
r7 part of parvocellular medial vestibular nucleus	3/301	0.990993	0.999962	0	0	0.347252	0.00314189	ITGB2;INHBA;A2M
r7 part of the basointermediate reticular formation	3/301	0.990993	0.999962	0	0	0.347252	0.00314189	SNCG;AMPD3;FGFBP3
r7 part of the posteroventral cochlear nucleus	3/301	0.990993	0.999962	0	0	0.347252	0.00314189	IFITM3;IGFBP3;WLS
r7 part of ventral gigangocellular reticular area	3/301	0.990993	0.999962	0	0	0.347252	0.00314189	ACLY;RGS1;AMPD3
r8 part of basomedial reticular formation	3/301	0.990993	0.999962	0	0	0.347252	0.00314189	DNAJA1;LGALS1;S100A10
r8 part of dorsal parvicellular reticular formation	3/301	0.990993	0.999962	0	0	0.347252	0.00314189	SOX11;EIF4B;ZMPSTE24
r8 part of gigantocellular reticular area	3/301	0.990993	0.999962	0	0	0.347252	0.00314189	CSTB;GDF15;SNCG
r8 part of inferior olive	3/301	0.990993	0.999962	0	0	0.347252	0.00314189	IGFBP3;RPL27;S100A10
r8 part of linear nucleus	3/301	0.990993	0.999962	0	0	0.347252	0.00314189	TOP2A;HLA-A;EIF4B
r8 part of nucleus of Roller	3/301	0.990993	0.999962	0	0	0.347252	0.00314189	ACLY;RGS1;S100A10
r8 part of ventral parvicellular reticular formation	3/301	0.990993	0.999962	0	0	0.347252	0.00314189	ACLY;LGALS1;EIF4B
r9 part of basointermediate reticular formation	3/301	0.990993	0.999962	0	0	0.347252	0.00314189	TOP2A;TXNIP;SNCG
r9 part of dorsal parvicellular reticular formation	3/301	0.990993	0.999962	0	0	0.347252	0.00314189	RPL37A;HMGA1;YWHAZ
r9 part of paragigantocellular nucleus	3/301	0.990993	0.999962	0	0	0.347252	0.00314189	TOP2A;TRIM28;IGFBP3
r9 part of the inferior olive	3/301	0.990993	0.999962	0	0	0.347252	0.00314189	TOP2A;TRIM28;SMARCA4
r9 part of trigeminal transition zone	3/301	0.990993	0.999962	0	0	0.347252	0.00314189	YWHAZ;EIF4B;ZMPSTE24
rhombomere 11	3/301	0.990993	0.999962	0	0	0.347252	0.00314189	TOP2A;HNRNPA2B1;TIMP1
rhombomere 2	3/301	0.990993	0.999962	0	0	0.347252	0.00314189	LGALS1;SPP1;TXNIP
suboptic nucleus	3/301	0.990993	0.999962	0	0	0.347252	0.00314189	IFITM3;TRIM28;CXCL13
superficial stratum of ITTh	3/301	0.990993	0.999962	0	0	0.347252	0.00314189	RPL18A;RGS16;TNC
superficial stratum of Ist	3/301	0.990993	0.999962	0	0	0.347252	0.00314189	TNC;S100A6;NEUROG2
superficial stratum of PHyB-D	3/301	0.990993	0.999962	0	0	0.347252	0.00314189	GRN;PEG10;ALOX5AP
superficial stratum of POH	3/301	0.990993	0.999962	0	0	0.347252	0.00314189	IL1B;S100A6;CXCL13
superficial stratum of THyB-P	3/301	0.990993	0.999962	0	0	0.347252	0.00314189	RPL12;CXCL13;RPS13
superficial stratum of r10Tr	3/301	0.990993	0.999962	0	0	0.347252	0.00314189	EBF3;TNRC18;ATP9A
superficial stratum of r1BL	3/301	0.990993	0.999962	0	0	0.347252	0.00314189	IL1RN;IGFBP3;CD14
superficial stratum of r1Tr	3/301	0.990993	0.999962	0	0	0.347252	0.00314189	LGALS1;SAT1;NEUROG2
superficial stratum of r3BL	3/301	0.990993	0.999962	0	0	0.347252	0.00314189	TOP2A;NRG4;SPP1
superficial stratum of r4BI	3/301	0.990993	0.999962	0	0	0.347252	0.00314189	NRG4;INA;RPS13
superficial stratum of r4BM	3/301	0.990993	0.999962	0	0	0.347252	0.00314189	SLC20A1;SPP1;YWHAZ
superficial stratum of r5BI	3/301	0.990993	0.999962	0	0	0.347252	0.00314189	SLC38A1;YWHAQ;HSPG2
superficial stratum of r6Co	3/301	0.990993	0.999962	0	0	0.347252	0.00314189	CCL20;LCP1;WLS
superficial stratum of r7Co	3/301	0.990993	0.999962	0	0	0.347252	0.00314189	IFITM3;IGFBP3;WLS
superficial stratum of r9BI	3/301	0.990993	0.999962	0	0	0.347252	0.00314189	TOP2A;TRIM28;IGFBP3
superficial stratum of the IG	3/301	0.990993	0.999962	0	0	0.347252	0.00314189	S100A4;HSPG2;NEUROG2
tectal gray formation	3/301	0.990993	0.999962	0	0	0.347252	0.00314189	TRIM28;GDF15;RPL27
terete nucleus	3/301	0.990993	0.999962	0	0	0.347252	0.00314189	RPL12;CXCL13;RPS13
ventral juxtacommissural pretectal nucleus	3/301	0.990993	0.999962	0	0	0.347252	0.00314189	TNC;NSG1;ATP5G3
ventral pallidum	3/301	0.990993	0.999962	0	0	0.347252	0.00314189	RGS2;CRABP1;AP2M1
ventral tier of thalamus	3/301	0.990993	0.999962	0	0	0.347252	0.00314189	RIMS3;RGS16;LSS
ventrolateral part of alar p1	3/301	0.990993	0.999962	0	0	0.347252	0.00314189	TNC;RPL24;EBF3
Parabigeminal nucleus	6/475	0.992122	0.999962	0	0	0.439719	0.00347782	IFITM3;GRN;IGFBP2;ITGB2;S100A6;CD14
Induseum griseum	5/435	0.994027	0.999962	0	0	0.399764	0.00239502	MMP14;S100A4;HSPG2;DUSP6;NEUROG2
Hindbrain	8/595	0.994165	0.999962	0	0	0.467214	0.00273418	BTG1;LGALS1;PTPRZ1;ZIC1;SPP1;TNC;VIM;A2M
Presubiculum	6/508	0.995848	0.999962	0	0	0.410099	0.00170609	TMEFF1;HNRNPK;CHL1;RPL22;NR3C1;TRIB2
Anterior cingulate area, dorsal part, layer 5	2/301	0.998166	0.999962	0	0	0.2303	0.000422737	DNAJA1;PPT1
Brain stem	2/301	0.998166	0.999962	0	0	0.2303	0.000422737	RGS16;CRABP1
Cochlear nuclei	2/301	0.998166	0.999962	0	0	0.2303	0.000422737	CCL20;LCP1
Dentate nucleus	2/301	0.998166	0.999962	0	0	0.2303	0.000422737	CCL20;DBI
Ectorhinal area	2/301	0.998166	0.999962	0	0	0.2303	0.000422737	PLIN2;RPS27A
Entorhinal area	2/301	0.998166	0.999962	0	0	0.2303	0.000422737	CDH2;PLIN2
Entorhinal area, lateral part	2/301	0.998166	0.999962	0	0	0.2303	0.000422737	CDH2;PLIN2
Entorhinal area, lateral part, layer 3	2/301	0.998166	0.999962	0	0	0.2303	0.000422737	CDH2;PLIN2
Entorhinal area, lateral part, layer 5	2/301	0.998166	0.999962	0	0	0.2303	0.000422737	CDH2;PLIN2
Entorhinal area, medial part, dorsal zone	2/301	0.998166	0.999962	0	0	0.2303	0.000422737	TMEFF1;CDH2
Entorhinal area, medial part, ventral zone, layer 3	2/301	0.998166	0.999962	0	0	0.2303	0.000422737	FOXG1;CXCL13
Frontal pole, layer 2/3	2/301	0.998166	0.999962	0	0	0.2303	0.000422737	IL1RN;SOX4
Geniculate group, dorsal thalamus	2/301	0.998166	0.999962	0	0	0.2303	0.000422737	RPL18A;RGS16
Islands of Calleja	2/301	0.998166	0.999962	0	0	0.2303	0.000422737	NRG4;CXCL13
Koelliker-Fuse subnucleus	2/301	0.998166	0.999962	0	0	0.2303	0.000422737	LGALS1;SAT1
Lateral amygdalar nucleus	2/301	0.998166	0.999962	0	0	0.2303	0.000422737	IL1B;DBI
Lateral reticular nucleus, parvicellular part	2/301	0.998166	0.999962	0	0	0.2303	0.000422737	TRIM28;IL1B
Medial geniculate complex, medial part	2/301	0.998166	0.999962	0	0	0.2303	0.000422737	RIMS3;RGS16
Medulla	2/301	0.998166	0.999962	0	0	0.2303	0.000422737	TOP2A;LGALS1
Medulla, motor related	2/301	0.998166	0.999962	0	0	0.2303	0.000422737	ACLY;LGALS1
Nucleus of the lateral lemniscus, dorsal part	2/301	0.998166	0.999962	0	0	0.2303	0.000422737	TNC;CD14
Nucleus of the lateral olfactory tract, molecular layer	2/301	0.998166	0.999962	0	0	0.2303	0.000422737	ACAP3;MARCKSL1
Nucleus of the solitary tract, lateral part	2/301	0.998166	0.999962	0	0	0.2303	0.000422737	RPL37A;SOX11
Olfactory tubercle	2/301	0.998166	0.999962	0	0	0.2303	0.000422737	YBX1;CXCL13
Pallidum, ventral region	2/301	0.998166	0.999962	0	0	0.2303	0.000422737	RGS2;AP2M1
Parasubiculum, layer 1	2/301	0.998166	0.999962	0	0	0.2303	0.000422737	GDF15;B2M
Parasubiculum, layer 2	2/301	0.998166	0.999962	0	0	0.2303	0.000422737	CHL1;PRPH
Parvicellular reticular nucleus	2/301	0.998166	0.999962	0	0	0.2303	0.000422737	SOX11;EIF4B
Pons, behavioral state related	2/301	0.998166	0.999962	0	0	0.2303	0.000422737	CSTB;SPP1
Pontine reticular nucleus	2/301	0.998166	0.999962	0	0	0.2303	0.000422737	CSTB;SPP1
Posterolateral visual area, layer 1	2/301	0.998166	0.999962	0	0	0.2303	0.000422737	PLIN2;DUSP6
Postpiriform transition area	2/301	0.998166	0.999962	0	0	0.2303	0.000422737	RPS7;PLAUR
Postpiriform transition area, layers 3	2/301	0.998166	0.999962	0	0	0.2303	0.000422737	MARCKSL1;PLAUR
Prelimbic area, layer 2	2/301	0.998166	0.999962	0	0	0.2303	0.000422737	IL1RN;PPT1
Primary somatosensory area	2/301	0.998166	0.999962	0	0	0.2303	0.000422737	LRP1;PTN
Primary somatosensory area, trunk, layer 1	2/301	0.998166	0.999962	0	0	0.2303	0.000422737	TRIM28;ENC1
Primary somatosensory area, unassigned, layer 2/3	2/301	0.998166	0.999962	0	0	0.2303	0.000422737	TNRC18;B2M
Retrohippocampal region	2/301	0.998166	0.999962	0	0	0.2303	0.000422737	CHL1;FOXG1
Retrosplenial area, ventral part	2/301	0.998166	0.999962	0	0	0.2303	0.000422737	GPX1;SMARCA4
Retrosplenial area, ventral part, layer 5	2/301	0.998166	0.999962	0	0	0.2303	0.000422737	GPX1;SMARCA4
Retrosplenial area, ventral part, layer 6b	2/301	0.998166	0.999962	0	0	0.2303	0.000422737	VAMP2;SEPT3
Secondary motor area, layer 2/3	2/301	0.998166	0.999962	0	0	0.2303	0.000422737	ENC1;SMARCA4
Somatosensory areas	2/301	0.998166	0.999962	0	0	0.2303	0.000422737	LRP1;PTN
Spinal nucleus of the trigeminal, oral part, middle dorsomedial part, dorsal zone	2/301	0.998166	0.999962	0	0	0.2303	0.000422737	YWHAQ;AP2M1
Spinal nucleus of the trigeminal, oral part, ventrolateral part	2/301	0.998166	0.999962	0	0	0.2303	0.000422737	LGALS1;LAPTM5
Subiculum, ventral part	2/301	0.998166	0.999962	0	0	0.2303	0.000422737	CHL1;YWHAB
Superior colliculus, motor related, deep white layer	2/301	0.998166	0.999962	0	0	0.2303	0.000422737	SNCG;AGRN
Superior colliculus, motor related, intermediate gray layer	2/301	0.998166	0.999962	0	0	0.2303	0.000422737	TNC;RPL27
Superior colliculus, motor related, intermediate gray layer, sublayer b	2/301	0.998166	0.999962	0	0	0.2303	0.000422737	TNC;RPL27
Superior colliculus, motor related, intermediate gray layer, sublayer c	2/301	0.998166	0.999962	0	0	0.2303	0.000422737	RPL24;RPL27
Ventral part of the lateral geniculate complex	2/301	0.998166	0.999962	0	0	0.2303	0.000422737	YWHAQ;LSS
alar plate of m1	2/301	0.998166	0.999962	0	0	0.2303	0.000422737	S100A6;RPL27
anterior digastric muscle trigeminal motor cell group	2/301	0.998166	0.999962	0	0	0.2303	0.000422737	SAT1;S100A10
basolateral amygdaloid nucleus, posterior part	2/301	0.998166	0.999962	0	0	0.2303	0.000422737	NR2F1;PLAUR
central layers of TG	2/301	0.998166	0.999962	0	0	0.2303	0.000422737	TRIM28;RPL27
cerebellar nuclei of CbH	2/301	0.998166	0.999962	0	0	0.2303	0.000422737	ITGB2;DBI
collicular (rostral) midbrain tectum	2/301	0.998166	0.999962	0	0	0.2303	0.000422737	S100A6;RPL27
dorsal cortical nucleus of inferior colliculus	2/301	0.998166	0.999962	0	0	0.2303	0.000422737	NEUROG2;SMARCA4
dorsolateral part of Int	2/301	0.998166	0.999962	0	0	0.2303	0.000422737	CCL20;CD14
dorsolateral part of m1A	2/301	0.998166	0.999962	0	0	0.2303	0.000422737	S100A6;RPL27
dorsolateral part of m2A	2/301	0.998166	0.999962	0	0	0.2303	0.000422737	S100A6;TAGLN2
entorhinal cortex	2/301	0.998166	0.999962	0	0	0.2303	0.000422737	CDH2;PLIN2
intermediate part of r3B	2/301	0.998166	0.999962	0	0	0.2303	0.000422737	SPP1;AGRN
intermediate part of r4B	2/301	0.998166	0.999962	0	0	0.2303	0.000422737	SPP1;AGRN
intermediate part of r6B	2/301	0.998166	0.999962	0	0	0.2303	0.000422737	IL1B;SNCG
intermediate stratum of CbH	2/301	0.998166	0.999962	0	0	0.2303	0.000422737	ITGB2;DBI
intermediate stratum of SC	2/301	0.998166	0.999962	0	0	0.2303	0.000422737	S100A6;RPL27
intermediate stratum of TG	2/301	0.998166	0.999962	0	0	0.2303	0.000422737	TRIM28;RPL27
intermediate stratum of isLim	2/301	0.998166	0.999962	0	0	0.2303	0.000422737	RPS20;TIMP1
intermediate stratum of m1Lim	2/301	0.998166	0.999962	0	0	0.2303	0.000422737	ITGB2;YWHAZ
intermediate stratum of p1Lim	2/301	0.998166	0.999962	0	0	0.2303	0.000422737	AP2M1;SMARCA4
intermediate stratum of r1Tr	2/301	0.998166	0.999962	0	0	0.2303	0.000422737	RPS18;RPS20
intermediate stratum of r2Lim	2/301	0.998166	0.999962	0	0	0.2303	0.000422737	MSN;LCP1
intermediate stratum of r4BI	2/301	0.998166	0.999962	0	0	0.2303	0.000422737	SPP1;AGRN
intermediate stratum of r4BL	2/301	0.998166	0.999962	0	0	0.2303	0.000422737	SPP1;MMP9
intermediate stratum of r5Tr	2/301	0.998166	0.999962	0	0	0.2303	0.000422737	GPC2;RPL37
intermediate stratum of r5Ve	2/301	0.998166	0.999962	0	0	0.2303	0.000422737	SOX11;SEPT2
intermediate stratum of r6BL	2/301	0.998166	0.999962	0	0	0.2303	0.000422737	CSTB;GPC2
intermediate stratum of r7BL	2/301	0.998166	0.999962	0	0	0.2303	0.000422737	NRG4;ZMPSTE24
intermediate stratum of r8BI	2/301	0.998166	0.999962	0	0	0.2303	0.000422737	TOP2A;SNCG
lateral part of Med	2/301	0.998166	0.999962	0	0	0.2303	0.000422737	BTG1;SOX11
lateral part of r3B	2/301	0.998166	0.999962	0	0	0.2303	0.000422737	NRG4;SPP1
lateral part of r4B	2/301	0.998166	0.999962	0	0	0.2303	0.000422737	SPP1;MMP9
lateral terminal nucleus of the accessory optic tract, ventral part	2/301	0.998166	0.999962	0	0	0.2303	0.000422737	TIMP1;AP2M1
layer 1 of LOT	2/301	0.998166	0.999962	0	0	0.2303	0.000422737	ACAP3;MARCKSL1
layer 1 of PaS	2/301	0.998166	0.999962	0	0	0.2303	0.000422737	CHL1;GDF15
layer 2 of ERCx	2/301	0.998166	0.999962	0	0	0.2303	0.000422737	TMEFF1;PLIN2
layer 2 of PaS	2/301	0.998166	0.999962	0	0	0.2303	0.000422737	CHL1;GDF15
layer 3 of ERCx	2/301	0.998166	0.999962	0	0	0.2303	0.000422737	CDH2;PLIN2
layer 3 of FCx	2/301	0.998166	0.999962	0	0	0.2303	0.000422737	IL1RN;SH3BGRL3
layer 4 of ERCx	2/301	0.998166	0.999962	0	0	0.2303	0.000422737	CDH2;PLIN2
liminal part of the r9 alar plate	2/301	0.998166	0.999962	0	0	0.2303	0.000422737	ACLY;LGALS1
m1Lim part of the midbrain reticular formation	2/301	0.998166	0.999962	0	0	0.2303	0.000422737	ITGB2;YWHAZ
mantle zone of ERCx	2/301	0.998166	0.999962	0	0	0.2303	0.000422737	CDH2;PLIN2
mantle zone of IC	2/301	0.998166	0.999962	0	0	0.2303	0.000422737	S100A6;PLXNA1
mantle zone of PaS	2/301	0.998166	0.999962	0	0	0.2303	0.000422737	CHL1;TRIB2
mantle zone of m2ADL	2/301	0.998166	0.999962	0	0	0.2303	0.000422737	S100A6;TAGLN2
mantle zone of r3BI	2/301	0.998166	0.999962	0	0	0.2303	0.000422737	SPP1;AGRN
mantle zone of r3BL	2/301	0.998166	0.999962	0	0	0.2303	0.000422737	NRG4;SPP1
mantle zone of r4BL	2/301	0.998166	0.999962	0	0	0.2303	0.000422737	SPP1;MMP9
mantle zone of r5Co	2/301	0.998166	0.999962	0	0	0.2303	0.000422737	IFITM3;WLS
mantle zone of r6BI	2/301	0.998166	0.999962	0	0	0.2303	0.000422737	IL1B;SNCG
mantle zone of r7Tr	2/301	0.998166	0.999962	0	0	0.2303	0.000422737	TAGLN2;EIF4B
mantle zone of r7Ve	2/301	0.998166	0.999962	0	0	0.2303	0.000422737	ITGB2;A2M
mantle zone of r9Lim	2/301	0.998166	0.999962	0	0	0.2303	0.000422737	ACLY;LGALS1
mantle zone of r9Tr	2/301	0.998166	0.999962	0	0	0.2303	0.000422737	TAGLN2;EIF4B
mesomere 1	2/301	0.998166	0.999962	0	0	0.2303	0.000422737	S100A6;RPL27
pallidal part of olfactory tuberculum	2/301	0.998166	0.999962	0	0	0.2303	0.000422737	CXCL13;RPS13
para-abducens nucleus	2/301	0.998166	0.999962	0	0	0.2303	0.000422737	CSTB;AGRN
parasubthalamic nucleus (migrated)	2/301	0.998166	0.999962	0	0	0.2303	0.000422737	PABPC4;CXCL13
periventricular stratum of r2Ve	2/301	0.998166	0.999962	0	0	0.2303	0.000422737	HNRNPA2B1;DBI
periventricular stratum of r4Lim	2/301	0.998166	0.999962	0	0	0.2303	0.000422737	VAT1;IGFBP2
periventricular stratum of r5Tr	2/301	0.998166	0.999962	0	0	0.2303	0.000422737	SYT4;INHBA
periventricular stratum of r6Tr	2/301	0.998166	0.999962	0	0	0.2303	0.000422737	ACLY;SYT4
periventricular stratum of r6Ve	2/301	0.998166	0.999962	0	0	0.2303	0.000422737	ITGB2;INHBA
periventricular stratum of r7Tr	2/301	0.998166	0.999962	0	0	0.2303	0.000422737	ACLY;SYT4
periventricular stratum of the VAP	2/301	0.998166	0.999962	0	0	0.2303	0.000422737	NR2F1;HDGF
polymorph layer of TuStr	2/301	0.998166	0.999962	0	0	0.2303	0.000422737	RGS2;YBX1
posterior part of Int	2/301	0.998166	0.999962	0	0	0.2303	0.000422737	ITGB2;DBI
r1 part of dorsal parvicellular reticular formation	2/301	0.998166	0.999962	0	0	0.2303	0.000422737	RPS18;RPS20
r10 basal plate	2/301	0.998166	0.999962	0	0	0.2303	0.000422737	TOP2A;LGALS1
r2 basal plate	2/301	0.998166	0.999962	0	0	0.2303	0.000422737	CSTB;SPP1
r2 part of basointermediate reticular formation	2/301	0.998166	0.999962	0	0	0.2303	0.000422737	SPP1;AP2M1
r2 part of nucleus subcoeruleus	2/301	0.998166	0.999962	0	0	0.2303	0.000422737	HMGA1;AGRN
r2 part of the ventral parvicellular reticular formation	2/301	0.998166	0.999962	0	0	0.2303	0.000422737	MSN;LCP1
r2 part of ventral lateral lemniscal nucleus	2/301	0.998166	0.999962	0	0	0.2303	0.000422737	MMP14;TAGLN2
r2 part of vestibular nucleus Y	2/301	0.998166	0.999962	0	0	0.2303	0.000422737	HNRNPA2B1;DBI
r3 alar plate	2/301	0.998166	0.999962	0	0	0.2303	0.000422737	TTR;SPP1
r3 part of lateral vestibular nucleus	2/301	0.998166	0.999962	0	0	0.2303	0.000422737	TTR;SOX11
r3 pontine raphe nucleus	2/301	0.998166	0.999962	0	0	0.2303	0.000422737	CSTB;SPP1
r4 alar plate	2/301	0.998166	0.999962	0	0	0.2303	0.000422737	TTR;HNRNPA2B1
r4 basal plate	2/301	0.998166	0.999962	0	0	0.2303	0.000422737	SLC20A1;SPP1
r4 liminal central gray	2/301	0.998166	0.999962	0	0	0.2303	0.000422737	VAT1;IGFBP2
r4 part of basointermediate reticular formation	2/301	0.998166	0.999962	0	0	0.2303	0.000422737	SPP1;AGRN
r4 part of basolateral reticular formation	2/301	0.998166	0.999962	0	0	0.2303	0.000422737	SPP1;MMP9
r5 (gustatory) part of solitary complex	2/301	0.998166	0.999962	0	0	0.2303	0.000422737	SYT4;INHBA
r5 basal plate	2/301	0.998166	0.999962	0	0	0.2303	0.000422737	SPP1;HSPG2
r5 part of dorsal parvicellular reticular formation	2/301	0.998166	0.999962	0	0	0.2303	0.000422737	GPC2;RPL37
r5 part of magnocellular medial vestibular nucleus	2/301	0.998166	0.999962	0	0	0.2303	0.000422737	SOX11;SEPT2
r5 part of the cochlear column	2/301	0.998166	0.999962	0	0	0.2303	0.000422737	IFITM3;WLS
r5 part of the oral Sp5 subnucleus	2/301	0.998166	0.999962	0	0	0.2303	0.000422737	HNRNPA2B1;LAPTM5
r6 (gustatory) part of solitary complex	2/301	0.998166	0.999962	0	0	0.2303	0.000422737	ACLY;SYT4
r6 basal plate	2/301	0.998166	0.999962	0	0	0.2303	0.000422737	CSTB;SYT4
r6 part of dorsal parvicellular reticular formation	2/301	0.998166	0.999962	0	0	0.2303	0.000422737	SOX11;EIF4B
r6 part of parvocellular medial vestibular nucleus	2/301	0.998166	0.999962	0	0	0.2303	0.000422737	ITGB2;INHBA
[truncated: 174 more rows]

## Sheet: Allen Brain Atlas down
Term	Overlap	P-value	Adjusted P-value	Old P-value	Old Adjusted P-value	Odds Ratio	Combined Score	Genes
layer 1 of FCx	59/300	4.75612e-33	1.02589e-29	0	0	9.42016	701.104	APP;SLC25A3;CD81;STMN3;ATP5G3;ENO2;RPL6;RPL7A;TUBA1B;CHCHD2;RPS16;TUBA1A;PPP2R1A;TUBB3;BSG;KIF1A;CTSD;AP2M1;CTSB;SLC38A1;RPS7;RPS8;TMOD2;APLP1;RPL13A;SYP;EEF1A1;MYL6;SFPQ;CANX;EEF1A2;ND3;PPIA;INA;PAFAH1B1;MAGED1;ATP5A1;OAZ1;NDRG1;PCSK1N;UBN2;RPL14;RPS27A;RPL19;MAP4K4;KIDINS220;NSG1;EEF2;NACA;FASN;HNRNPD;GNAS;CPE;CALR;RPS24;EIF4G2;RAN;TPT1;GRINA
Primary motor area, Layer 1	51/300	1.47775e-25	1.59375e-22	0	0	7.75364	443.308	RPL4;SLC25A3;CD81;STMN3;ACTB;RPL6;RPL7A;TUBA1B;CHCHD2;RPS16;PPP2R1A;TUBB3;BSG;DPYSL3;CTSD;CTSB;APC2;SNRPN;TMOD2;APLP1;RPL13A;RPSA;SYP;MORF4L1;RAB31;HNRNPH1;CANX;EEF1A2;ND3;PPIA;SQSTM1;OAZ1;NDRG1;RPL14;FLNA;RPS2;RPS27A;RAB6B;CLASP2;SPAG9;KIDINS220;NSG1;EEF2;QKI;SQLE;NACA;FASN;RPS24;RAN;TPT1;GRINA
Hindbrain	65/560	1.0062e-22	7.23458e-20	0	0	5.04663	255.615	RPL5;RAB3C;HSP90AB1;CELF2;CELF3;HNRNPU;NUCKS1;CHD3;RPL6;RPL7A;UCHL1;RIMS3;RPS16;MPRIP;CCND1;PEA15;KIF1A;AP2M1;DDX17;ACTR2;MEF2C;H2AFY;RPL23;APLP1;TMOD2;MYL6;GAP43;SFPQ;TUBB2A;PKM;VGF;FSCN1;EVL;GAPDH;PPIA;DBN1;RTN3;RTN1;RPL10;MAGED1;USP11;RPL11;SDC3;HMP19;OAZ1;PLD3;PSAP;RPS3;RPL15;NTRK2;MARCKSL1;SYT1;CNBP;USP22;MARCH6;PRRC2B;PRRC2A;MLLT11;RPL27A;PNOC;HNRNPD;CPE;CTNNB1;ITM2C;CDK5R1
OB olfactory fiber layer	47/300	4.53272e-22	2.44427e-19	0	0	6.97604	342.841	RPL10;RPLP0;STMN2;CHD4;ATP5G3;ACTB;RPL6;RPL7A;UCHL1;TUBA1B;CHCHD2;PCSK1N;RPS16;KIF5C;TRIM2;IDS;NEFL;KIF1A;RPS11;RPS27A;CTSD;RAB6B;CTSB;RPL19;HSP90AA1;RPS7;TMOD2;RPL13A;SYP;NSG1;EEF2;PGM2L1;PRRC2A;TUBB2B;TUBB2A;NACA;RPL27A;TTC3;RPS20;RPL26;MAPT;ALDOA;AGRN;RPS24;EIF4G2;PAFAH1B1;GRINA
Cerebellar cortex	45/300	2.14065e-20	6.59627e-18	0	0	6.60028	298.93	RPL5;RTN3;HSP90AB1;YWHAB;USP11;HMP19;RPL6;PLD3;RPL7A;UCHL1;PCSK1N;RPS16;DPYSL2;IDS;KIF1A;RPL15;RPS11;AP2M1;DYNC1H1;MARCKSL1;TSC22D1;RPS7;RPS8;RPL23;RPS6;RPL35A;L1CAM;MLLT11;RPS25;MYL6;RPS28;TUBB2A;VGF;NACA;RPL27A;TTC3;RPL37A;HNRNPD;FSCN1;EVL;RPS21;PPIA;PFDN5;RPS24;PFN2
Cerebellum	45/300	2.14065e-20	6.59627e-18	0	0	6.60028	298.93	RPL5;RTN3;USP11;HMP19;RPL6;PLD3;RPL7A;UCHL1;PCSK1N;RPS16;DPYSL2;TRIM2;IDS;KIF1A;RPL15;RPS11;AP2M1;DYNC1H1;MARCKSL1;TSC22D1;RPS7;RPS8;RPL23;RPS6;RPL35A;L1CAM;MLLT11;RPS25;MYL6;RPS28;TUBB2A;VGF;NACA;RPL27A;TTC3;RPL37A;HNRNPD;FSCN1;CDH13;EVL;RPS21;PPIA;PFDN5;RPS24;PFN2
layer 1 of PCx	45/300	2.14065e-20	6.59627e-18	0	0	6.60028	298.93	RPL4;SLC25A3;CD81;GSTP1;ATN1;STMN3;ENO2;OAZ1;ACTB;RPL7A;TUBA1B;CHCHD2;TUBA1A;TUBB3;UBN2;BSG;KIF1A;RPL15;RPS27A;CTSD;RAB6B;CTSB;DDX17;SPAG9;SNRPN;RPL23;TMOD2;APLP1;RPL13A;RPSA;NSG1;QKI;TUBB2B;NACA;FASN;CSDE1;CANX;EEF1A2;RPL26;ALDOA;ND3;SQSTM1;EIF4G2;TPT1;GRINA
Primary somatosensory area, lower limb, layer 1	44/300	1.4116e-19	2.76802e-17	0	0	6.41555	278.463	RPL4;HSP90AB1;MAGED1;CD81;ENO2;OAZ1;NDRG1;ACTB;ELAVL3;TUBA1B;CHCHD2;TUBA1A;TUBB3;UBN2;PEA15;KIF5A;RPL15;RPS27A;CTSD;CTSB;DDX17;APC2;HSPA8;RPL23;TMOD2;APLP1;RPSA;SYP;QKI;SFPQ;TUBB2A;HNRNPH1;NACA;CANX;EEF1A2;SERINC1;FAU;ALDOA;ND3;PPIA;SQSTM1;GAPDH;EIF4G2;TPT1
Primary somatosensory area, upper limb, layer 1	44/300	1.4116e-19	2.76802e-17	0	0	6.41555	278.463	RPL4;SLC25A3;MAGED1;CD81;ATP5A1;ENO2;KLC1;NDRG1;RPL6;RPL7A;TUBA1B;CHCHD2;TUBA1A;TUBB3;UBN2;BSG;NCAM1;KIF1A;RPL15;RPS2;RPS27A;CTSD;RAB6B;CTSB;MAP4K4;SPAG9;CADM3;SNRPN;APLP1;RPL13A;RPSA;NSG1;QKI;SQLE;SFPQ;NACA;CANX;CPE;HDGF;ALDOA;ND3;SQSTM1;TPT1;GRINA
Secondary motor area, layer 1	44/300	1.4116e-19	2.76802e-17	0	0	6.41555	278.463	SLC25A3;MAGED1;CD81;STMN3;DBI;CHD4;ENO2;NDRG1;RPL6;ADD2;RPL7A;TUBA1B;CHCHD2;TUBA1A;TUBB3;UBN2;BSG;RPL14;RPL13;KIF1A;RPS27A;CTSD;AP2M1;CTSB;MAP4K4;CADM3;RPS7;RPL23;APLP1;RPL35A;SYP;QKI;SEPT3;TUBB2A;RAB31;NACA;CANX;EEF1A2;ALDOA;ND3;RPS24;EIF4G2;TPT1;GRINA
superficial stratum of OB	44/300	1.4116e-19	2.76802e-17	0	0	6.41555	278.463	RPL10;YWHAB;STMN3;ATP5G3;RPL6;RPS14;UCHL1;TUBA1B;PCSK1N;RPS16;KIF5C;TRIM2;IDS;NEFL;KIF1A;RPS11;RPS27A;RAB6B;RPL19;ACTR2;RPS7;KIDINS220;RPS8;TMOD2;RPS6;RPL13A;NMNAT2;NSG1;EEF2;PGM2L1;PRRC2A;RPS25;TUBB2A;NACA;RPL27A;TTC3;RPS20;RPL26;AGRN;RPS24;RAN;TPT1;PAFAH1B1;GRINA
Paramedian lobule	43/300	9.05025e-19	1.30143e-16	0	0	6.2329	258.954	RPL5;RTN3;RPL10;USP11;OAZ1;RPL6;PLD3;RPS14;RPL7A;UCHL1;PCSK1N;RPS16;DPYSL5;DPYSL2;TRIM2;IDS;KIF1A;RPS11;AP2M1;APC2;DYNC1H1;MARCKSL1;KIDINS220;RPS8;RPL23;TMOD2;RPS6;RPL35A;L1CAM;TMEFF1;RPS28;TUBB2A;VGF;NACA;RPL27A;TTC3;RPL37A;FSCN1;RPL24;EVL;PPIA;PFDN5;PFN2
Paramedian lobule, granular layer	43/300	9.05025e-19	1.30143e-16	0	0	6.2329	258.954	RPL5;RTN3;RPL10;USP11;OAZ1;RPL6;PLD3;RPS14;RPL7A;UCHL1;PCSK1N;RPS16;DPYSL5;DPYSL2;TRIM2;IDS;KIF1A;RPS11;AP2M1;APC2;DYNC1H1;MARCKSL1;KIDINS220;RPS8;RPL23;TMOD2;RPS6;RPL35A;L1CAM;LSS;TMEFF1;RPS28;TUBB2A;VGF;RPL27A;TTC3;RPL37A;RPL24;EVL;PPIA;PFDN5;RPS24;PFN2
cerebellar hemisphere	43/300	9.05025e-19	1.30143e-16	0	0	6.2329	258.954	RPL5;RAB3C;RTN3;RPL10;USP11;HMP19;OAZ1;RPL6;PLD3;RPL7A;UCHL1;PCSK1N;RPS16;DPYSL5;DPYSL2;IDS;KIF1A;RPL15;RPS11;AP2M1;MARCKSL1;TSC22D1;KIDINS220;RPS8;RPL23;RPS6;RPL35A;HN1;L1CAM;RPS28;TUBB2A;VGF;RPL27A;PNOC;TTC3;RPL37A;FSCN1;CDH13;EVL;PPIA;PFDN5;RAN;PFN2
r3 roof plate	43/300	9.05025e-19	1.30143e-16	0	0	6.2329	258.954	APP;GRN;PTPRS;RTN1;GDI1;RPL31;MAGED1;DCTN1;GSTP1;STMN2;ENO2;OAZ1;UCHL1;PCSK1N;CHL1;TUBB3;FLNA;PIP4K2B;CKB;RPS11;PHLDA1;RAB6B;YWHAG;RPL19;MAP4K4;PRPH;HSP90AA1;SNRPN;KIDINS220;USP22;RPL13A;SYP;NSG1;MARCH6;EEF1A1;MORF4L1;ILF3;TUBB2A;EEF1A2;CPE;EVL;RPL26;SMAP2
OB glomerular layer	42/300	5.63881e-18	5.28822e-16	0	0	6.05228	240.378	RPL10;YWHAB;MRFAP1;STMN3;RPL6;RPS14;UCHL1;TUBA1B;PCSK1N;RPS16;KIF5C;IDS;NEFL;RPS11;RPS27A;RAB6B;RPL19;ACTR2;RPS7;KIDINS220;RPS8;RPS6;RPL13A;NMNAT2;NSG1;EEF2;PGM2L1;PRRC2A;RPS25;TMEFF1;TUBB2A;NACA;RPL27A;TTC3;RPS20;RPL26;AGRN;RPS24;RAN;TPT1;PAFAH1B1;GRINA
Paramedian lobule, molecular layer	42/300	5.63881e-18	5.28822e-16	0	0	6.05228	240.378	RPL5;RPL10;USP11;OAZ1;RPL6;PLD3;RPL7A;UCHL1;PCSK1N;RPS16;DPYSL5;DPYSL2;TRIM2;IDS;KIF1A;RPS11;AP2M1;APC2;DYNC1H1;MARCKSL1;TSC22D1;KIDINS220;RPS8;RPL23;RPS6;RPL35A;L1CAM;TMEFF1;MYL6;RPS28;TUBB2A;VGF;NACA;RPL27A;TTC3;RPL37A;FSCN1;RPL24;EVL;PPIA;PFDN5;PFN2
Primary somatosensory area, barrel field, layer 1	42/300	5.63881e-18	5.28822e-16	0	0	6.05228	240.378	RPL4;SLC25A3;CD81;GSTP1;MRFAP1;ATN1;CHD4;ENO2;KLC1;OAZ1;RPL7A;CHCHD2;TUBA1A;TUBB3;UBN2;BSG;DPYSL3;RPL15;RPS27A;CTSD;PHLDA1;MAP4K4;ACTR2;SLC38A1;SNRPN;RPL23;RPSA;QKI;RPS28;TUBB2B;NACA;FASN;CANX;EEF1A2;CPE;HDGF;ALDOA;ND3;GAPDH;RPS24;TPT1;GRINA
Simple lobule, molecular layer	42/300	5.63881e-18	5.28822e-16	0	0	6.05228	240.378	RPL5;RTN3;USP11;HMP19;ACTB;RPL6;PLD3;RPL7A;UCHL1;PCSK1N;RPS16;RPS19;DPYSL5;DPYSL2;IDS;KIF1A;RPL15;RPS11;AP2M1;APC2;MARCKSL1;RPS8;RPL23;APLP1;RPS6;L1CAM;RPS28;TUBB2A;VGF;RPL27A;PNOC;TTC3;RPL37A;FSCN1;FXYD6;EVL;FAU;RPS21;PPIA;PFDN5;RPS24;PFN2
cortex of cerebellar vermis	42/300	5.63881e-18	5.28822e-16	0	0	6.05228	240.378	RPL5;RTN3;HSP90AB1;YWHAB;USP11;RPL6;PLD3;RPS15;UCHL1;TUBA1B;PCSK1N;RPS16;GNG2;RPS19;DPYSL2;IDS;KIF1A;AP2M1;FDFT1;MARCKSL1;JUND;TSC22D1;RPS7;RPS8;RPL23;APLP1;RPL35A;MLLT11;RPS25;MYL6;RPS28;TUBB2A;VGF;NACA;RPL27A;TTC3;HNRNPD;EVL;RPS21;PPIA;RPS24;PFN2
mantle zone of CbH	42/300	5.63881e-18	5.28822e-16	0	0	6.05228	240.378	RPL5;RAB3C;RTN3;RPL10;USP11;HMP19;OAZ1;RPL6;PLD3;RPL7A;UCHL1;PCSK1N;RPS16;DPYSL5;DPYSL2;IDS;KIF1A;RPL15;RPS11;AP2M1;MARCKSL1;TSC22D1;KIDINS220;RPS8;RPL23;RPS6;RPL35A;HN1;L1CAM;RPS28;TUBB2A;VGF;RPL27A;TTC3;RPL37A;FSCN1;CDH13;EVL;PPIA;PFDN5;RAN;PFN2
periventricular stratum of cerebellar vermis	42/300	5.63881e-18	5.28822e-16	0	0	6.05228	240.378	RPL5;HSP90AB1;YWHAB;USP11;RPL11;HMP19;RPL6;PLD3;RPS15;RPL7A;UCHL1;TUBA1B;PCSK1N;RPS16;GNG2;RPS19;DPYSL2;TRIM2;AP2M1;MARCKSL1;JUND;TSC22D1;RPS7;RPL23;MLLT11;RPS25;MYL6;RPS28;TUBB2A;VGF;NACA;RPL27A;TTC3;RPL37A;HNRNPD;CDH13;EVL;RPL26;RPS21;PPIA;RPS24;PFN2
prepontine hindbrain	42/300	5.63881e-18	5.28822e-16	0	0	6.05228	240.378	RPL5;RTN3;HSP90AB1;YWHAB;USP11;HMP19;OAZ1;RPL6;PLD3;RPL7A;UCHL1;PCSK1N;RPS16;DPYSL2;TRIM2;IDS;KIF1A;RPL15;AP2M1;ACTR2;MARCKSL1;TSC22D1;RPS7;RPS8;RPL23;USP22;APLP1;MLLT11;MYL6;RPS28;TUBB2A;ARPC2;VGF;NACA;RPL27A;HNRNPD;FSCN1;EVL;PPIA;PFDN5;DBN1;PFN2
Simple lobule	41/300	3.41251e-17	2.30024e-15	0	0	5.87368	222.709	RPL5;RTN3;USP11;HMP19;ACTB;RPL6;PLD3;RPL7A;UCHL1;PCSK1N;RPS16;RPS19;DPYSL5;DPYSL2;IDS;KIF1A;RPL15;RPS11;AP2M1;APC2;MARCKSL1;RPS8;RPL23;APLP1;RPS6;L1CAM;RPS25;RPS28;TUBB2A;VGF;RPL27A;TTC3;RPL37A;FSCN1;FXYD6;EVL;RPS21;PPIA;PFDN5;RPS24;PFN2
cerebellar white matter	41/300	3.41251e-17	2.30024e-15	0	0	5.87368	222.709	RPL5;RPL10;USP11;HMP19;OAZ1;RPL6;PLD3;RPL7A;UCHL1;PCSK1N;RPS16;DPYSL2;TRIM2;IDS;KIF1A;RPL15;RPS11;AP2M1;TSC22D1;RPS7;KIDINS220;RPS8;RPL23;RPS6;RPL35A;HN1;L1CAM;RPS25;MYL6;RPS28;VGF;NACA;RPL27A;TTC3;CDH13;EVL;RPS21;PPIA;PFDN5;DBN1;RAN
mantle zone of cerebellar vermis	41/300	3.41251e-17	2.30024e-15	0	0	5.87368	222.709	RPL5;RTN3;HSP90AB1;YWHAB;USP11;RPL6;PLD3;RPS15;UCHL1;TUBA1B;PCSK1N;RPS16;GNG2;RPS19;DPYSL2;IDS;KIF1A;AP2M1;FDFT1;MARCKSL1;TSC22D1;RPS7;RPS8;RPL23;APLP1;RPL35A;MLLT11;RPS25;MYL6;RPS28;TUBB2A;VGF;NACA;RPL27A;TTC3;HNRNPD;EVL;RPS21;PPIA;RPS24;PFN2
molecular layer of CbHCx	41/300	3.41251e-17	2.30024e-15	0	0	5.87368	222.709	RPL5;RAB3C;RTN3;RPL10;USP11;HMP19;OAZ1;RPL6;PLD3;RPL7A;UCHL1;PCSK1N;RPS16;DPYSL5;DPYSL2;IDS;KIF1A;RPL15;RPS11;AP2M1;APC2;DYNC1H1;MARCKSL1;RPS8;RPL23;RPS6;RPL35A;L1CAM;RPS28;TUBB2A;VGF;RPL27A;TTC3;RPL37A;FSCN1;CDH13;EVL;PPIA;PFDN5;RAN;PFN2
molecular layer of CbVCx	41/300	3.41251e-17	2.30024e-15	0	0	5.87368	222.709	RPL5;RTN3;HSP90AB1;RPL6;PLD3;RPS15;UCHL1;TUBA1B;PCSK1N;GNG2;RPS19;PPP2R1A;DPYSL2;IDS;KIF1A;AP2M1;FDFT1;DYNC1H1;MARCKSL1;JUND;TSC22D1;RPS7;RPS8;RPL23;APLP1;RPL35A;MLLT11;RPS25;MYL6;RPS28;TUBB2A;VGF;NACA;RPL27A;TTC3;HNRNPD;EVL;RPS21;PPIA;RPS24;PFN2
periventricular stratum of CbH	41/300	3.41251e-17	2.30024e-15	0	0	5.87368	222.709	RPL5;RPL10;USP11;HMP19;OAZ1;RPL6;PLD3;RPL7A;UCHL1;PCSK1N;RPS16;DPYSL2;TRIM2;IDS;KIF1A;RPL15;RPS11;AP2M1;TSC22D1;RPS7;KIDINS220;RPS8;RPL23;RPS6;RPL35A;HN1;L1CAM;RPS25;MYL6;RPS28;VGF;NACA;RPL27A;TTC3;CDH13;EVL;RPS21;PPIA;PFDN5;DBN1;RAN
r1 alar plate	41/300	3.41251e-17	2.30024e-15	0	0	5.87368	222.709	RPL5;RAB3C;RTN3;RPL10;USP11;HMP19;OAZ1;RPL6;PLD3;RPL7A;UCHL1;PCSK1N;RPS16;DPYSL2;IDS;KIF1A;RPL15;RPS11;AP2M1;MARCKSL1;TSC22D1;KIDINS220;RPS8;RPL23;RPS6;HN1;L1CAM;RPS28;TUBB2A;VGF;RPL27A;TTC3;RPL37A;FSCN1;CDH13;EVL;PPIA;PFDN5;DBN1;RAN;PFN2
superficial stratum of cerebellar vermis	41/300	3.41251e-17	2.30024e-15	0	0	5.87368	222.709	RPL5;RTN3;HSP90AB1;YWHAB;USP11;RPL6;PLD3;RPS15;UCHL1;TUBA1B;PCSK1N;RPS16;GNG2;RPS19;DPYSL2;IDS;KIF1A;AP2M1;FDFT1;MARCKSL1;TSC22D1;RPS7;RPS8;RPL23;APLP1;RPL35A;MLLT11;RPS25;MYL6;RPS28;TUBB2A;VGF;NACA;RPL27A;TTC3;HNRNPD;EVL;RPS21;PPIA;RPS24;PFN2
white matter of cerebellar vermis	41/300	3.41251e-17	2.30024e-15	0	0	5.87368	222.709	RPL5;HSP90AB1;YWHAB;USP11;RPL11;HMP19;RPL6;PLD3;RPS15;RPL7A;UCHL1;TUBA1B;PCSK1N;RPS16;GNG2;RPS19;DPYSL2;TRIM2;AP2M1;MARCKSL1;TSC22D1;RPS7;RPL23;MLLT11;RPS25;MYL6;RPS28;TUBB2A;VGF;NACA;RPL27A;TTC3;RPL37A;HNRNPD;CDH13;EVL;RPL26;RPS21;PPIA;RPS24;PFN2
Culmen	40/300	2.00489e-16	1.10886e-14	0	0	5.69706	205.925	RPL5;RTN3;HSP90AB1;YWHAB;USP11;HMP19;RPL6;PLD3;RPS15;RPL7A;UCHL1;TUBA1B;PCSK1N;RPS16;GNG2;RPS19;IDS;KIF1A;AP2M1;FDFT1;MARCKSL1;TSC22D1;RPS7;RPL23;APLP1;RPL35A;RPS25;MYL6;RPS28;TUBB2A;VGF;NACA;RPL27A;TTC3;RPL37A;FSCN1;EVL;RPS21;RPS24;PFN2
Lobules IV-V	40/300	2.00489e-16	1.10886e-14	0	0	5.69706	205.925	RPL5;RTN3;HSP90AB1;USP11;HMP19;RPL6;PLD3;RPS15;RPL7A;UCHL1;TUBA1B;PCSK1N;RPS16;GNG2;RPS19;IDS;KIF1A;AP2M1;FDFT1;MARCKSL1;JUND;TSC22D1;RPS7;RPL23;APLP1;RPL35A;RPS25;MYL6;RPS28;TUBB2A;VGF;NACA;RPL27A;TTC3;RPL37A;FSCN1;EVL;RPS21;RPS24;PFN2
Purkinje cell layer of CbHCx	40/300	2.00489e-16	1.10886e-14	0	0	5.69706	205.925	RPL5;RAB3C;RTN3;RPL10;USP11;HMP19;OAZ1;RPL6;PLD3;RPL7A;UCHL1;PCSK1N;RPS16;DPYSL5;DPYSL2;IDS;KIF1A;RPL15;RPS11;AP2M1;MARCKSL1;KIDINS220;RPS8;RPL23;RPS6;RPL35A;L1CAM;RPS28;TUBB2A;VGF;RPL27A;TTC3;RPL37A;FSCN1;CDH13;EVL;PPIA;PFDN5;RAN;PFN2
cerebellar vermis	40/300	2.00489e-16	1.10886e-14	0	0	5.69706	205.925	RPL5;RTN3;HSP90AB1;USP11;RPL6;PLD3;RPS15;UCHL1;TUBA1B;PCSK1N;RPS16;GNG2;RPS19;DPYSL2;IDS;KIF1A;AP2M1;FDFT1;MARCKSL1;TSC22D1;RPS7;RPS8;RPL23;APLP1;RPL35A;MLLT11;RPS25;MYL6;RPS28;TUBB2A;VGF;NACA;RPL27A;TTC3;HNRNPD;EVL;RPS21;PPIA;RPS24;PFN2
internal granular layer of CbVCx	40/300	2.00489e-16	1.10886e-14	0	0	5.69706	205.925	RPL5;RTN3;HSP90AB1;USP11;RPL6;PLD3;RPS15;UCHL1;TUBA1B;PCSK1N;RPS16;GNG2;RPS19;DPYSL2;IDS;AP2M1;FDFT1;MARCKSL1;JUND;TSC22D1;RPS7;RPS8;RPL23;APLP1;RPL35A;MLLT11;RPS25;MYL6;RPS28;TUBB2A;VGF;NACA;RPL27A;TTC3;HNRNPD;EVL;RPS21;PPIA;RPS24;PFN2
rhombomere 1	40/300	2.00489e-16	1.10886e-14	0	0	5.69706	205.925	RPL5;RAB3C;RTN3;RPL10;USP11;HMP19;OAZ1;RPL6;PLD3;RPL7A;UCHL1;PCSK1N;RPS16;DPYSL2;TRIM2;IDS;KIF1A;RPL15;RPS11;AP2M1;MARCKSL1;TSC22D1;KIDINS220;RPS8;RPL23;TMOD2;RPS6;HN1;L1CAM;RPS28;TUBB2A;VGF;RPL27A;FSCN1;EVL;PPIA;PFDN5;DBN1;RAN;PFN2
superficial stratum of cerebellar hemisphere	40/300	2.00489e-16	1.10886e-14	0	0	5.69706	205.925	RPL5;RAB3C;RTN3;RPL10;USP11;HMP19;RPL6;PLD3;RPL7A;UCHL1;PCSK1N;RPS16;DPYSL5;DPYSL2;IDS;KIF1A;RPL15;RPS11;AP2M1;APC2;MARCKSL1;RPS8;RPL23;RPS6;RPL35A;L1CAM;RPS28;TUBB2A;VGF;RPL27A;PNOC;TTC3;RPL37A;FSCN1;CDH13;EVL;PPIA;PFDN5;RAN;PFN2
Lobules IV-V, granular layer	39/300	1.14288e-15	5.2451e-14	0	0	5.5224	189.999	RPL5;RTN3;USP11;HMP19;RPL6;PLD3;RPS15;RPL7A;UCHL1;TUBA1B;PCSK1N;RPS16;GNG2;RPS19;IDS;AP2M1;FDFT1;MARCKSL1;TSC22D1;RPS7;RPL23;APLP1;RPL35A;RPS25;MYL6;RPS28;TUBB2A;VGF;NACA;RPL27A;PNOC;TTC3;RPL37A;HNRNPD;FSCN1;EVL;RPS21;RPS24;PFN2
Lobules IV-V, molecular layer	39/300	1.14288e-15	5.2451e-14	0	0	5.5224	189.999	RPL5;RTN3;HSP90AB1;YWHAB;USP11;HMP19;RPL6;PLD3;RPS15;RPL7A;UCHL1;TUBA1B;PCSK1N;RPS16;GNG2;RPS19;IDS;KIF1A;AP2M1;FDFT1;MARCKSL1;TSC22D1;RPS7;RPL23;APLP1;RPL35A;RPS25;MYL6;RPS28;TUBB2A;VGF;NACA;RPL27A;TTC3;FSCN1;EVL;RPS21;RPS24;PFN2
Primary somatosensory area, mouth, layer 1	39/300	1.14288e-15	5.2451e-14	0	0	5.5224	189.999	RPL4;APP;SLC25A3;CD81;GSTP1;ATN1;STMN3;OAZ1;RPL6;RPL7A;CHCHD2;PPP2R1A;BSG;RPL14;RPS2;RPS11;CTSD;PHLDA1;RPL19;SNRPN;TSC22D1;LMO4;TMOD2;RPSA;SYT13;QKI;MYL6;NACA;FASN;EEF1A2;RPL37A;HNRNPD;CPE;HDGF;HNRNPC;ND3;RPS24;PAFAH1B1;GRINA
Primary somatosensory area, trunk, layer 1	39/300	1.14288e-15	5.2451e-14	0	0	5.5224	189.999	RPL4;HSP90AB1;CD81;GSTP1;ENO2;NDRG1;ACTB;TUBA1B;TUBA1A;TUBB3;UBN2;NCAM1;RPL15;RPS27A;CTSD;RAB6B;CTSB;DDX17;SPAG9;HSPA8;SNRPN;RPL23;APLP1;RPSA;NSG1;QKI;TUBB2B;NACA;CSDE1;CANX;EEF1A2;RPL26;FAU;ALDOA;TKT;ND3;SQSTM1;GAPDH;TPT1
Simple lobule, granular layer	39/300	1.14288e-15	5.2451e-14	0	0	5.5224	189.999	RPL5;RTN3;USP11;HMP19;ACTB;RPL6;PLD3;RPL7A;UCHL1;RPS16;RPS19;DPYSL5;DPYSL2;IDS;KIF1A;RPL15;RPS11;AP2M1;MARCKSL1;RPS8;RPL23;RPS6;HN1;L1CAM;RPS25;RPS28;TUBB2A;RPL27A;PNOC;TTC3;RPL37A;FSCN1;FXYD6;EVL;RPS21;PPIA;PFDN5;RPS24;PFN2
cortex of cerebellar hemisphere	39/300	1.14288e-15	5.2451e-14	0	0	5.5224	189.999	RPL5;RAB3C;RTN3;RPL10;USP11;HMP19;RPL6;PLD3;RPL7A;UCHL1;PCSK1N;RPS16;DPYSL5;DPYSL2;IDS;KIF1A;RPL15;RPS11;AP2M1;APC2;MARCKSL1;RPS8;RPL23;RPS6;RPL35A;L1CAM;RPS28;TUBB2A;VGF;RPL27A;TTC3;RPL37A;FSCN1;CDH13;EVL;PPIA;PFDN5;RAN;PFN2
layer 2 of FCx	39/300	1.14288e-15	5.2451e-14	0	0	5.5224	189.999	APP;SLC25A3;SPARC;CD82;MAGED1;CD81;ATP5A1;STMN3;ENO2;NDRG1;TUBA1B;CHCHD2;PCSK1N;PPP2R1A;UBN2;BSG;RPL14;RPS27A;CTSD;MAP4K4;SLC38A1;RPS7;KIDINS220;RPS8;APLP1;RPL13A;EEF2;QKI;MYL6;SFPQ;FASN;CANX;EEF1A2;GNAS;ND3;INA;RPS24;TPT1;GRINA
layer 2 of PCx	39/300	1.14288e-15	5.2451e-14	0	0	5.5224	189.999	RPL4;SLC25A3;CD81;GSTP1;ATN1;DBI;OAZ1;NDRG1;RPL7A;CHCHD2;TUBA1A;TUBB3;UBN2;BSG;DPYSL3;NCAM1;RPL15;RPS27A;CTSD;CD164;SLC38A1;JUND;SNRPN;RPL23;IGFBP3;TMOD2;APLP1;RPSA;QKI;TUBB2B;NACA;FASN;CANX;EEF1A2;ALDOA;ND3;RPS24;TPT1;GRINA
Copula pyramidis	38/300	6.3176e-15	2.62059e-13	0	0	5.34968	174.91	RPL5;RAB3C;RTN3;RPL30;USP11;RPL6;PLD3;RPS14;UCHL1;PCSK1N;DPYSL2;IDS;RPS11;AP2M1;APC2;DYNC1H1;MARCKSL1;TSC22D1;RPL23;USP22;SYT13;MARCH6;MYL6;TUBB2A;VGF;NACA;RPL27A;TTC3;RPL37A;HNRNPD;FSCN1;CDH13;EVL;MAPT;SMAP2;RPS21;PPIA;DBN1
Hemispheric regions	38/300	6.3176e-15	2.62059e-13	0	0	5.34968	174.91	RPL5;RAB3C;RTN3;RPL10;USP11;RPL6;PLD3;RPL7A;UCHL1;PCSK1N;RPS16;DPYSL5;DPYSL2;IDS;KIF1A;RPL15;RPS11;AP2M1;APC2;MARCKSL1;RPS8;RPL23;RPS6;RPL35A;L1CAM;RPS28;TUBB2A;VGF;RPL27A;TTC3;RPL37A;FSCN1;CDH13;EVL;PPIA;PFDN5;RAN;PFN2
Main olfactory bulb, glomerular layer	38/300	6.3176e-15	2.62059e-13	0	0	5.34968	174.91	STMN2;STMN3;RPL6;RPS14;UCHL1;TUBA1B;PCSK1N;RPS16;ALCAM;KIF5C;IDS;NEFL;CKB;RPS11;RAB6B;AP2M1;RPS7;KIDINS220;RPS8;RPS6;NMNAT2;NSG1;EEF2;PGM2L1;PRRC2A;TUBB2B;TUBB2A;RPL27A;RPL24;RPS20;RPL26;AGRN;SMAP2;RPS24;RAN;TPT1;PAFAH1B1;GRINA
Paraflocculus, molecular layer	38/300	6.3176e-15	2.62059e-13	0	0	5.34968	174.91	RAB3C;MRFAP1;ACTB;PLD3;RPL7A;UCHL1;PCSK1N;RPS16;DPYSL5;RPS18;TUBB3;DPYSL2;TRIM2;BSG;KIF5A;IDS;KIF1A;RPL15;RPS11;CLASP2;APC2;DYNC1H1;HSP90AA1;RPS8;RPL23;RPS6;L1CAM;PJA2;MLLT11;RPL27A;TTC3;RPL37A;RPS20;EVL;MAPT;PPIA;RAN;PFN2
internal granular layer of CbHCx	38/300	6.3176e-15	2.62059e-13	0	0	5.34968	174.91	RPL5;RAB3C;RTN3;RPL10;USP11;HMP19;RPL6;PLD3;RPL7A;UCHL1;PCSK1N;RPS16;DPYSL5;DPYSL2;IDS;KIF1A;RPL15;RPS11;AP2M1;APC2;MARCKSL1;RPS8;RPL23;RPS6;RPL35A;L1CAM;RPS28;TUBB2A;RPL27A;TTC3;RPL37A;FSCN1;CDH13;EVL;PPIA;PFDN5;RAN;PFN2
Uvula (IX)	37/300	3.38439e-14	1.3273e-12	0	0	5.17886	160.633	RPL5;RPL11;RPL6;PLD3;ADD2;RPS15;TUBA1B;PCSK1N;ATCAY;RPS3;RPL35;IDS;PHLDA1;TSC22D1;RPS8;RPL23;NONO;RPL13A;RPL35A;MLLT11;EEF1G;RPS25;RPS28;TUBB2A;NACA;RPL27A;TTC3;GNB1;RPL37A;HNRNPD;RPL24;TMBIM6;TKT;RPS21;PFDN5;RPS24;PFN2
Uvula (IX), granular layer	37/300	3.38439e-14	1.3273e-12	0	0	5.17886	160.633	RPL5;RPL11;RPL6;PLD3;ADD2;RPS15;RPL7A;TUBA1B;PCSK1N;ATCAY;RPS3;RPL35;IDS;PHLDA1;TSC22D1;RPS8;RPL23;RPL13A;RPL35A;MLLT11;EEF1G;RPS25;RPS28;TUBB2A;NACA;RPL27A;TTC3;GNB1;RPL37A;HNRNPD;RPL24;TMBIM6;EVL;TKT;RPS21;RPS24;PFN2
neural plate	37/300	3.38439e-14	1.3273e-12	0	0	5.17886	160.633	SPARC;CD81;STXBP1;STMN3;NDRG1;RPL6;PCSK1N;RPS16;DPYSL5;DPYSL2;BSG;KIF5A;SNCG;NCAM1;RPS11;AP2M1;APC2;JUND;RPS8;RPS6;RPL13A;RPL35A;EEF2;QKI;ACLY;RPS28;TUBB2A;NACA;TTC3;RPL37A;GNAS;TXNIP;EVL;RPL26;ND3;RPS24;RAN
Copula pyramidis, molecular layer	36/300	1.75593e-13	6.76348e-12	0	0	5.00993	147.145	RAB3C;RTN3;RPL30;USP11;PLD3;RPS14;UCHL1;PCSK1N;DPYSL2;IDS;RPS11;AP2M1;APC2;DYNC1H1;MARCKSL1;TSC22D1;KIDINS220;RPS8;RPL23;USP22;SYT13;MARCH6;MYL6;TUBB2A;VGF;NACA;RPL27A;TTC3;HNRNPD;FSCN1;CDH13;EVL;MAPT;SMAP2;PPIA;DBN1
Crus 1, molecular layer	35/300	8.81747e-13	2.92604e-11	0	0	4.84285	134.422	RPL5;RAB3C;RTN3;RPL10;USP11;RPL6;PLD3;RPL7A;UCHL1;RPS16;RPS19;DPYSL5;DPYSL2;IDS;KIF1A;RPL15;AP2M1;MARCKSL1;RPS8;RPL23;RPS6;L1CAM;RPS28;TUBB2A;RPL27A;TTC3;RPL37A;FSCN1;EVL;RPS21;PPIA;PFDN5;RPS24;RAN;PFN2
Flocculus	35/300	8.81747e-13	2.92604e-11	0	0	4.84285	134.422	RAB3C;SET;RPL10;PLD3;RPL7A;RPS16;DPYSL5;RPS18;DPYSL2;BSG;IDS;RPS11;CLASP2;APC2;HSP90AA1;JUND;RPL21;KIDINS220;RPS6;L1CAM;PJA2;MLLT11;MORF4L1;TUBB2A;VGF;RPL27A;RPL37A;FSCN1;CDH13;RPS20;EVL;MAPT;DBN1;RAN;PAFAH1B1
Flocculus, molecular layer	35/300	8.81747e-13	2.92604e-11	0	0	4.84285	134.422	RAB3C;SET;RPL10;PLD3;RPL7A;RPS16;DPYSL5;RPS18;DPYSL2;BSG;IDS;RPS11;LRRC4B;CLASP2;APC2;HSP90AA1;RPL21;KIDINS220;RPS8;RPS6;L1CAM;PJA2;MLLT11;MORF4L1;TUBB2A;VGF;RPL27A;CSDE1;RPL37A;FSCN1;EVL;MAPT;DBN1;RAN;PAFAH1B1
OB outer plexiform layer	35/300	8.81747e-13	2.92604e-11	0	0	4.84285	134.422	RPL10;MRFAP1;STMN3;RPL6;UCHL1;PCSK1N;RPS16;ALCAM;CHL1;KIF5C;IDS;NEFL;RPS11;RAB6B;RPL19;RPS7;KIDINS220;RPS8;RPS6;NMNAT2;NSG1;EEF2;PGM2L1;TMEFF1;TUBB2A;RPL27A;RPL37A;GNAS;RPL26;AGRN;SMAP2;INA;RPS24;RAN;PAFAH1B1
Paraflocculus	35/300	8.81747e-13	2.92604e-11	0	0	4.84285	134.422	RAB3C;MRFAP1;ACTB;PLD3;RPL7A;UCHL1;PCSK1N;RPS16;DPYSL5;TUBB3;DPYSL2;TRIM2;BSG;KIF5A;IDS;KIF1A;RPL15;RPS11;CLASP2;APC2;HSP90AA1;RPS8;RPL23;RPS6;L1CAM;PJA2;RPL27A;CANX;RPL37A;RPS20;EVL;MAPT;PFDN5;RAN;PFN2
Vermal regions	35/300	8.81747e-13	2.92604e-11	0	0	4.84285	134.422	RPL5;HSP90AB1;YWHAB;RPL6;PLD3;RPS15;RPL7A;UCHL1;TUBA1B;PCSK1N;GNG2;IDS;AP2M1;FDFT1;MARCKSL1;TSC22D1;RPS7;RPL23;APLP1;RPL35A;MLLT11;RPS25;MYL6;RPS28;TUBB2A;VGF;NACA;RPL27A;TTC3;HNRNPD;FSCN1;EVL;RPS21;RPS24;PFN2
intermediate stratum of OB	35/300	8.81747e-13	2.92604e-11	0	0	4.84285	134.422	RPL10;MRFAP1;STMN3;RPL6;UCHL1;PCSK1N;RPS16;ALCAM;CHL1;KIF5C;IDS;NEFL;RPS11;RAB6B;RPL19;RPS7;KIDINS220;RPS8;RPS6;NMNAT2;NSG1;EEF2;PGM2L1;TMEFF1;TUBB2A;RPL27A;RPL37A;GNAS;RPL26;AGRN;SMAP2;INA;RPS24;RAN;PAFAH1B1
lateral part of r6B	35/300	8.81747e-13	2.92604e-11	0	0	4.84285	134.422	APP;HSP90AB1;GDI1;RPL10;TTYH1;DCTN1;CELF2;SDC3;GRIK3;HNRNPU;HMP19;ENO2;RPL7;ADD2;SCRN1;SV2A;PSAP;DDX17;SPAG9;HSPA8;RPL21;SYT1;LMO4;APLP2;NMNAT2;PRRC2A;EEF1A1;SFPQ;SERBP1;CTNNB1;CPE;PPIA;SQSTM1;GAPDH;ITM2C
mantle zone of r6BL	35/300	8.81747e-13	2.92604e-11	0	0	4.84285	134.422	APP;HSP90AB1;GDI1;RPL10;TTYH1;DCTN1;CELF2;SDC3;GRIK3;HNRNPU;HMP19;ENO2;RPL7;ADD2;SCRN1;SV2A;PSAP;DDX17;SPAG9;HSPA8;RPL21;SYT1;LMO4;APLP2;NMNAT2;PRRC2A;EEF1A1;SFPQ;SERBP1;CTNNB1;CPE;PPIA;SQSTM1;GAPDH;ITM2C
Basic cell groups and regions	34/300	4.28232e-12	1.14037e-10	0	0	4.67761	122.444	SPARC;CD81;STXBP1;STMN3;NDRG1;RPL6;PCSK1N;RPS16;YWHAQ;DPYSL5;DPYSL2;BSG;KIF5A;NCAM1;RPS11;AP2M1;APC2;RPS8;RPL35A;EEF2;QKI;ACLY;RPS28;TUBB2A;ARPC2;NACA;TTC3;RPL37A;GNAS;EVL;RPL26;ND3;RPS24;RAN
Copula pyramidis, granular layer	34/300	4.28232e-12	1.14037e-10	0	0	4.67761	122.444	RPL5;RAB3C;RTN3;RPL30;USP11;RPL6;PLD3;UCHL1;PCSK1N;IDS;RPS11;AP2M1;APC2;DYNC1H1;MARCKSL1;TSC22D1;RPL23;USP22;SYT13;MARCH6;MYL6;TUBB2A;VGF;NACA;RPL27A;TTC3;RPL37A;HNRNPD;CDH13;EVL;MAPT;SMAP2;RPS21;DBN1
Cortical amygdalar area, posterior part, lateral zone, layer 1	34/300	4.28232e-12	1.14037e-10	0	0	4.67761	122.444	GPM6A;HSP90AB1;ATP5A1;ENO2;KLC1;NDRG1;ACTB;RPL7A;TUBA1B;CHCHD2;TUBA1A;DPYSL2;UBN2;KIF5A;NCAM1;RPL15;CTSB;CLASP2;CAP1;DYNC1H1;HSPA8;TPI1;LMO4;RPSA;NSG1;TUBB2B;GNAS;EIF3E;FAU;ALDOA;SQSTM1;PFDN5;TPT1;PAFAH1B1
Entorhinal area, lateral part, layer 1	34/300	4.28232e-12	1.14037e-10	0	0	4.67761	122.444	RPL4;RPL5;CD82;GSTP1;MRFAP1;KLC1;SAT1;RPL6;RPS14;RPL7A;CHCHD2;SV2A;RPL14;NEFL;CKB;CTSD;RPL19;VAT1;CAP1;DYNC1H1;HSPA5;KIDINS220;APLP2;RPL13A;NSG1;MLLT11;RAB31;RPL37A;RPL24;EIF3E;ALDOA;PFDN5;TPT1;GRINA
Entorhinal area, medial part, dorsal zone, layer 1	34/300	4.28232e-12	1.14037e-10	0	0	4.67761	122.444	RPL4;RPL5;HSP90AB1;GDI1;CD82;MRFAP1;KLC1;SAT1;ACTB;RPL6;RPS14;RPL7A;CHCHD2;KIF5C;SV2A;RPL14;NCAM1;KIF3C;RPS27A;CTSB;CLASP2;CAP1;APC2;DYNC1H1;KIDINS220;RPL13A;RPSA;NSG1;ACLY;SFPQ;RPL24;MAPT;FAU;PFDN5
Main olfactory bulb, mitral layer	34/300	4.28232e-12	1.14037e-10	0	0	4.67761	122.444	RPL4;RPL10;STMN3;RPL6;UCHL1;RGS2;PCSK1N;ALCAM;GNG2;CHL1;KIF5C;IDS;NEFL;KIF1A;RPS11;RAB6B;YWHAH;RPS7;KIDINS220;RPS8;RPS6;NMNAT2;NSG1;SYT13;EEF2;PGM2L1;TMEFF1;RPS28;RPL37A;RPL26;AGRN;RPS24;RAN;PAFAH1B1
Mus musculus	34/300	4.28232e-12	1.14037e-10	0	0	4.67761	122.444	SPARC;CD81;STXBP1;STMN3;NDRG1;RPL6;PCSK1N;RPS16;DPYSL5;DPYSL2;BSG;KIF5A;SNCG;RPS11;AP2M1;APC2;RPS8;RPL13A;RPL35A;EEF2;QKI;ACLY;RPS28;TUBB2A;NACA;TTC3;RPL37A;GNAS;TXNIP;EVL;RPL26;ND3;RPS24;RAN
OB mitral cell layer	34/300	4.28232e-12	1.14037e-10	0	0	4.67761	122.444	RPL10;MRFAP1;STMN3;RPL6;UCHL1;RGS2;PCSK1N;GNG2;CHL1;KIF5C;IDS;NEFL;RPS11;RAB6B;RPL19;RPS7;RPS8;RPS6;NMNAT2;NSG1;EEF2;PGM2L1;EEF1G;TMEFF1;RPS28;RPL27A;RPL37A;GNAS;RPL26;FAU;AGRN;RPS24;RAN;PAFAH1B1
Purkinje cell layer of CbVCx	34/300	4.28232e-12	1.14037e-10	0	0	4.67761	122.444	RPL5;HSP90AB1;YWHAB;RPL6;PLD3;RPS15;UCHL1;TUBA1B;PCSK1N;GNG2;DPYSL2;AP2M1;FDFT1;DYNC1H1;MARCKSL1;TSC22D1;RPS7;RPL23;APLP1;RPL35A;MLLT11;TMEFF1;MYL6;RPS28;TUBB2A;VGF;NACA;TTC3;HNRNPD;EVL;RPS21;PPIA;EIF4G2;PFN2
isthmic alar plate	34/300	4.28232e-12	1.14037e-10	0	0	4.67761	122.444	RPL5;RTN3;HSP90AB1;YWHAB;RPL6;PLD3;RPS15;UCHL1;TUBA1B;PCSK1N;RPS16;GNG2;RPS19;PPP2R1A;KIF1A;AP2M1;DYNC1H1;MARCKSL1;TSC22D1;RPS7;RPL23;APLP1;MLLT11;MYL6;RPS28;TUBB2A;VGF;NACA;RPL27A;TTC3;HNRNPD;EVL;PPIA;PFN2
layer 1 of ERCx	34/300	4.28232e-12	1.14037e-10	0	0	4.67761	122.444	RPL4;RPL5;NDRG4;HSP90AB1;CD82;GSTP1;MRFAP1;KLC1;OAZ1;SAT1;ACTB;RPL6;RPL7A;KIF5C;SV2A;RPL14;NEFL;CKB;KIF3C;RPS11;CTSB;RPL19;CAP1;DYNC1H1;HSPA5;KIDINS220;RPL13A;RAB31;RPL37A;RPL24;EVL;MAPT;FAU;PFDN5
mantle zone of OB	34/300	4.28232e-12	1.14037e-10	0	0	4.67761	122.444	RPL10;YWHAB;STMN3;RPL6;UCHL1;PCSK1N;RPS16;ALCAM;KIF5C;IDS;NEFL;KIF1A;RPS11;RAB6B;AP2M1;RPL19;RPS7;KIDINS220;RPS8;RPS6;NMNAT2;NSG1;EEF2;PGM2L1;TMEFF1;RPL27A;GNAS;RPL24;RPL26;AGRN;RPS24;RAN;TPT1;PAFAH1B1
olfactory bulb, principal part	34/300	4.28232e-12	1.14037e-10	0	0	4.67761	122.444	RPL10;YWHAB;STMN3;RPL6;UCHL1;PCSK1N;RPS16;ALCAM;KIF5C;IDS;NEFL;KIF1A;RPS11;RAB6B;AP2M1;RPL19;RPS7;KIDINS220;RPS8;RPS6;NMNAT2;NSG1;EEF2;PGM2L1;TMEFF1;RPL27A;GNAS;RPL24;RPL26;AGRN;RPS24;RAN;TPT1;PAFAH1B1
periventricular stratum of OB	34/300	4.28232e-12	1.14037e-10	0	0	4.67761	122.444	RPL4;RPL10;YWHAB;STMN3;RPL6;UCHL1;RGS2;PCSK1N;ALCAM;CHL1;KIF5C;NEFL;RPS11;RAB6B;JUND;RPS7;RPS8;RPS6;NMNAT2;SYT13;EEF2;PGM2L1;EEF1G;TMEFF1;RPS28;RPL37A;GNAS;RPL24;RPL26;FAU;AGRN;RPS21;RPS24;PAFAH1B1
r4 alar plate	34/300	4.28232e-12	1.14037e-10	0	0	4.67761	122.444	GPM6A;TTYH3;PTPRS;MAGED1;CELF2;SDC3;GRIK3;HNRNPU;CHD3;GNAI2;GNG2;CCND1;PEA15;FLNA;DDX17;ACTR2;NTRK2;SYT1;USP22;TMOD2;PRRC2B;PJA2;SFPQ;GAP43;ARPC2;VGF;RPL27A;EEF1A2;HNRNPC;MAPT;VAMP2;DBN1;ITM2C;CDK5R1
root	34/300	4.28232e-12	1.14037e-10	0	0	4.67761	122.444	SPARC;CD81;STXBP1;STMN3;NDRG1;RPL6;PCSK1N;RPS16;YWHAQ;DPYSL5;DPYSL2;BSG;KIF5A;NCAM1;RPS11;AP2M1;APC2;RPS8;RPL35A;EEF2;QKI;ACLY;RPS28;TUBB2A;NACA;TTC3;RPL37A;GNAS;TXNIP;EVL;RPL26;ND3;RPS24;RAN
Crus 1	33/300	2.00997e-11	4.92672e-10	0	0	4.51418	111.186	RPL5;RAB3C;RPL10;USP11;RPL6;PLD3;RPL7A;UCHL1;RPS16;RPS19;DPYSL5;DPYSL2;IDS;KIF1A;RPL15;RPS11;AP2M1;MARCKSL1;RPS8;RPL23;RPS6;L1CAM;RPS28;RPL27A;TTC3;RPL37A;EVL;RPS21;PPIA;PFDN5;RPS24;RAN;PFN2
Crus 2	33/300	2.00997e-11	4.92672e-10	0	0	4.51418	111.186	RPL5;RPL10;USP11;RPL6;PLD3;RPL7A;UCHL1;RPS16;RPS19;DPYSL5;DPYSL2;IDS;KIF1A;RPL15;RPS11;AP2M1;MARCKSL1;RPS8;RPL23;RPS6;RPL35A;L1CAM;TMEFF1;RPS28;VGF;RPL27A;TTC3;RPL24;EVL;RPS21;PPIA;PFDN5;PFN2
Crus 2, molecular layer	33/300	2.00997e-11	4.92672e-10	0	0	4.51418	111.186	RPL5;RPL10;USP11;RPL6;PLD3;RPL7A;UCHL1;RPS16;RPS19;DPYSL5;DPYSL2;IDS;KIF1A;RPL15;RPS11;AP2M1;MARCKSL1;RPS8;RPL23;RPS6;RPL35A;L1CAM;MYL6;RPS28;VGF;RPL27A;TTC3;RPL24;EVL;RPS21;PPIA;PFDN5;PFN2
Main olfactory bulb	33/300	2.00997e-11	4.92672e-10	0	0	4.51418	111.186	RPL10;YWHAB;STMN3;RPL6;UCHL1;PCSK1N;RPS16;ALCAM;KIF5C;IDS;NEFL;KIF1A;RPS11;RAB6B;AP2M1;JUND;RPS7;KIDINS220;RPS8;RPS6;NMNAT2;NSG1;EEF2;PGM2L1;TMEFF1;RPL27A;RPL24;RPL26;AGRN;RPS24;RAN;TPT1;PAFAH1B1
Paraflocculus, granular layer	33/300	2.00997e-11	4.92672e-10	0	0	4.51418	111.186	RAB3C;CD81;MRFAP1;ACTB;PLD3;RPL7A;UCHL1;PCSK1N;RPS16;TUBB3;DPYSL2;TRIM2;BSG;KIF5A;IDS;RPL15;RPS11;CLASP2;HSP90AA1;RPS8;RPL23;RPS6;L1CAM;PJA2;RPL27A;CANX;RPL37A;RPS20;EVL;MAPT;PFDN5;RAN;PFN2
pontomedullary hindbrain	33/300	2.00997e-11	4.92672e-10	0	0	4.51418	111.186	RTN1;CELF2;SDC3;CELF3;GRIK3;HNRNPU;HMP19;CHD3;SOX2;PDZD4;RIMS3;MPRIP;ZMIZ1;PEA15;NNAT;RPS3;DDX17;NTRK2;SYT1;H2AFY;CNBP;PRRC2A;SFPQ;GAP43;SERBP1;CTNNB1;CPE;MAPT;PPIA;GAPDH;DBN1;ITM2C;CDK5R1
r5 alar plate	33/300	2.00997e-11	4.92672e-10	0	0	4.51418	111.186	GPM6A;TTYH3;PTPRS;RTN1;MAGED1;CELF2;SDC3;GRIK3;HNRNPU;NUCKS1;CHD3;PDZD4;GNG2;CCND1;PEA15;RPS3;DDX17;MEF2C;MARCKSL1;SYT1;H2AFY;PRRC2B;PRRC2A;EEF1G;SFPQ;GAP43;PKM;EEF1A2;MAPT;VAMP2;DBN1;ITM2C;CDK5R1
Ansiform lobule	32/300	9.11031e-11	2.06852e-09	0	0	4.35253	100.626	RPL5;RPL10;USP11;RPL6;PLD3;RPL7A;UCHL1;RPS16;RPS19;DPYSL5;DPYSL2;IDS;KIF1A;RPL15;RPS11;AP2M1;MARCKSL1;RPS8;RPL23;RPS6;L1CAM;MYL6;RPS28;RPL27A;TTC3;EVL;RPS21;PPIA;PFDN5;RPS24;RAN;PFN2
Crus 1, granular layer	32/300	9.11031e-11	2.06852e-09	0	0	4.35253	100.626	RPL5;RAB3C;RPL10;USP11;RPL6;PLD3;RPL7A;UCHL1;RGS2;RPS16;RPS19;DPYSL5;DPYSL2;IDS;KIF1A;RPS11;AP2M1;MARCKSL1;RPS8;RPL23;RPS6;L1CAM;RPS28;RPL27A;TTC3;EVL;RPS21;PPIA;PFDN5;RPS24;RAN;PFN2
Frontal pole, layer 1	32/300	9.11031e-11	2.06852e-09	0	0	4.35253	100.626	APP;RPL5;SLC25A3;CD82;CD81;ATP5A1;STMN3;ATP5G3;ENO2;NDRG1;UCHL1;TUBA1B;PPP2R1A;BSG;RPL19;SLC38A1;RPS7;RPS8;IGFBP2;RPL13A;RPL35A;EEF2;FASN;TTC3;HNRNPD;GNAS;CALR;INA;RPS24;RAN;PAFAH1B1;GRINA
Uvula (IX), molecular layer	32/300	9.11031e-11	2.06852e-09	0	0	4.35253	100.626	RPL5;RPL11;PLD3;ADD2;RPS15;TUBA1B;ATCAY;RPS3;RPL35;IDS;PHLDA1;TSC22D1;RPS8;RPL23;NONO;RPL13A;RPL35A;MLLT11;EEF1G;TUBB2A;NACA;RPL27A;PNOC;GNB1;RPL37A;HNRNPD;RPL24;TMBIM6;RPS21;PFDN5;RPS24;PFN2
layer 1 of AOV cortex	32/300	9.11031e-11	2.06852e-09	0	0	4.35253	100.626	CSTB;RPL10;CD81;RPLP0;ATP5G3;RPL6;RPL7A;CHCHD2;PCSK1N;PLXNA1;SNCG;RPS27A;CTSD;CTSB;CLASP2;SPAG9;KIDINS220;RPS8;RPS6;NMNAT2;NSG1;EEF2;PRRC2A;SQLE;ACLY;TUBB2B;NACA;RPL24;RPS20;RPL26;RPS24;TPT1
r5 part of posteroventral cochlear nucleus	32/300	9.11031e-11	2.06852e-09	0	0	4.35253	100.626	NDRG4;SET;TTYH3;PTPRS;MAGED1;GSTP1;OAZ1;PLD3;RPS14;LASP1;RPS16;TUBB3;SV2A;FLNA;ATP9A;RPL19;MAP4K4;SPAG9;DYNC1H1;SNRPN;HN1;MARCH6;PJA2;EEF1A1;GNAO1;MORF4L1;GAP43;SERBP1;CDH13;HDGF;EIF3E;SMAP2
superficial stratum of r5Co	32/300	9.11031e-11	2.06852e-09	0	0	4.35253	100.626	NDRG4;SET;TTYH3;PTPRS;MAGED1;GSTP1;OAZ1;PLD3;RPS14;LASP1;RPS16;TUBB3;SV2A;FLNA;ATP9A;RPL19;MAP4K4;SPAG9;DYNC1H1;SNRPN;HN1;MARCH6;PJA2;EEF1A1;GNAO1;MORF4L1;GAP43;SERBP1;CDH13;HDGF;EIF3E;SMAP2
Anterior olfactory nucleus, layer 1	31/300	3.98424e-10	8.10756e-09	0	0	4.19265	90.7437	CSTB;CD81;RPLP0;ATP5G3;OAZ1;RPL6;CHCHD2;PCSK1N;SNCG;RPS27A;CTSB;MAP4K4;CLASP2;APC2;SPAG9;KIDINS220;RPS8;RPS6;RPL13A;NSG1;EEF2;SQLE;ACLY;RPS28;NACA;FASN;RPL37A;RPL26;PPIA;RPS24;TPT1
Crus 2, granular layer	31/300	3.98424e-10	8.10756e-09	0	0	4.19265	90.7437	RPL5;RPL10;USP11;RPL6;PLD3;UCHL1;RPS16;RPS19;DPYSL5;DPYSL2;IDS;KIF1A;RPS11;AP2M1;MARCKSL1;RPS8;RPL23;RPS6;RPL35A;L1CAM;TMEFF1;RPS28;VGF;RPL27A;TTC3;RPL24;EVL;RPS21;PPIA;PFDN5;PFN2
Main olfactory bulb, outer plexiform layer	31/300	3.98424e-10	8.10756e-09	0	0	4.19265	90.7437	RPL10;YWHAB;MRFAP1;STMN3;RPL6;RPS15;UCHL1;PCSK1N;RPS16;ALCAM;KIF5C;IDS;NEFL;RPS11;RAB6B;RPS7;KIDINS220;RPS8;RPS6;NMNAT2;NSG1;EEF2;PGM2L1;TUBB2A;RPL27A;GNAS;RPL26;AGRN;RPS24;RAN;PAFAH1B1
OB inner plexiform layer	31/300	3.98424e-10	8.10756e-09	0	0	4.19265	90.7437	RPL10;STMN3;RPL6;UCHL1;RGS2;PCSK1N;GNG2;CHL1;KIF5C;IDS;NEFL;RPS11;RAB6B;AP2M1;RPS7;RPS8;RPS6;NMNAT2;NSG1;SYT13;EEF2;PGM2L1;EEF1G;TMEFF1;RPS28;RPL27A;GNAS;RPL26;AGRN;RPS24;PAFAH1B1
isthmus	31/300	3.98424e-10	8.10756e-09	0	0	4.19265	90.7437	RPL5;HSP90AB1;YWHAB;RPL6;PLD3;ADD2;RPS15;UCHL1;TUBA1B;RPS19;PPP2R1A;TRIM2;KIF1A;AP2M1;ACTR2;MARCKSL1;TSC22D1;RPS7;RPL23;APLP1;MLLT11;MYL6;RPS28;TUBB2A;VGF;NACA;RPL27A;HNRNPD;EVL;PPIA;PFN2
layer 1 of InsCx	31/300	3.98424e-10	8.10756e-09	0	0	4.19265	90.7437	RPL4;CD81;GSTP1;RPLP0;ATP5G3;OAZ1;NDRG1;CHCHD2;TRIM28;DPYSL5;PRDX1;BSG;DPYSL3;RPL14;FLNA;CKB;RPS2;RPS11;CTSD;RPL19;JUND;SNRPN;KIDINS220;TMOD2;EEF2;QKI;RAB31;ARPC2;FASN;EIF3E;RPL26
periventricular stratum of r6Co	31/300	3.98424e-10	8.10756e-09	0	0	4.19265	90.7437	PTPRS;RTN1;STMN2;CHD3;KLC1;ADD2;RPL7A;PCSK1N;CDH2;TUBB3;ENC1;SNRPN;CADM1;KIDINS220;USP22;SYP;NSG1;LSS;PRRC2B;PJA2;GNAO1;MORF4L1;GAP43;RAB31;VGF;EEF1A2;CDH13;SERINC1;EVL;RPL26;MAPT
plexiform layer of TuPal	31/300	3.98424e-10	8.10756e-09	0	0	4.19265	90.7437	RPL4;APP;GPM6A;GDI1;CD82;CD81;STMN2;DBI;KLC1;TUBA1A;YWHAQ;PPP2R1A;KIF5C;DNER;KIF5A;RPL15;YWHAH;HSPA8;CADM3;SNRPN;LMO4;USP22;APLP1;NMNAT2;EEF2;SQLE;TUBB2B;RAB31;FASN;GNAS;PFN2
r6 part of dorsal cochlear nucleus	31/300	3.98424e-10	8.10756e-09	0	0	4.19265	90.7437	PTPRS;RTN1;STMN2;CHD3;KLC1;ADD2;RPL7A;PCSK1N;CDH2;TUBB3;ENC1;SNRPN;CADM1;KIDINS220;USP22;SYP;NSG1;LSS;PRRC2B;PJA2;GNAO1;MORF4L1;GAP43;RAB31;VGF;EEF1A2;CDH13;SERINC1;EVL;RPL26;MAPT
rhombomere 11	31/300	3.98424e-10	8.10756e-09	0	0	4.19265	90.7437	KHDRBS1;SLC25A3;RTN1;GSTP1;ACTG1;ZFP36L1;ELAVL3;RPS14;FADS2;CHL1;TUBB3;PEA15;PSAP;RPL35;RPL13;PIP4K2B;CKB;PHLDA1;DDX17;HSP90AA1;SNRPN;KIDINS220;RPL13A;ILF3;HNRNPK;RAB31;PKM;NACA;CPE;HNRNPC;PFDN5
rhombomere 6	31/300	3.98424e-10	8.10756e-09	0	0	4.19265	90.7437	RTN1;CELF2;SDC3;CELF3;GRIK3;HNRNPU;HMP19;NUCKS1;CHD3;SOX2;PDZD4;RIMS3;MPRIP;ZMIZ1;NNAT;RPS3;DDX17;NTRK2;JUND;SYT1;H2AFY;PRRC2A;EEF1G;SFPQ;GAP43;CTNNB1;MATR3;GAPDH;DBN1;ITM2C;CDK5R1
Declive (VI)	30/300	1.67975e-09	2.99439e-08	0	0	4.03451	81.5158	RPL5;HSP90AB1;USP11;HMP19;RPL6;PLD3;RPS15;UCHL1;TUBA1B;RPS16;DPYSL3;IDS;KIF1A;AP2M1;FDFT1;MARCKSL1;RPS8;RPL23;RPL35A;RPS25;MYL6;RPS28;VGF;PNOC;TTC3;HNRNPD;EVL;RPS21;RPS24;PFN2
Declive (VI), molecular layer	30/300	1.67975e-09	2.99439e-08	0	0	4.03451	81.5158	RPL5;HSP90AB1;USP11;HMP19;RPL6;PLD3;RPS15;UCHL1;TUBA1B;RPS16;DPYSL3;IDS;KIF1A;AP2M1;FDFT1;MARCKSL1;RPS8;RPL23;RPL35A;RPS25;MYL6;RPS28;TUBB2A;VGF;TTC3;HNRNPD;EVL;RPS21;RPS24;PFN2
Frontal pole, cerebral cortex	30/300	1.67975e-09	2.99439e-08	0	0	4.03451	81.5158	APP;RPL5;SLC25A3;CD82;CD81;ATP5A1;STMN3;ENO2;NDRG1;UCHL1;PPP2R1A;BSG;SLC38A1;RPS7;RPS8;IGFBP2;RPL13A;RPL35A;EEF2;FASN;TTC3;HNRNPD;GNAS;CALR;INA;RPS24;RAN;PFN2;PAFAH1B1;GRINA
Medulla	30/300	1.67975e-09	2.99439e-08	0	0	4.03451	81.5158	RTN1;CELF2;SDC3;RPL11;HNRNPU;NUCKS1;CHD3;ACTG1;RPS15;PDZD4;RIMS3;MPRIP;PEA15;PSAP;NNAT;RPS3;DDX17;NTRK2;SYT1;H2AFY;NR2F1;PRRC2A;EEF1G;GAP43;PKM;HNRNPD;CTNNB1;MATR3;TMBIM6;ITM2C
[truncated: 2,047 more rows]

## Sheet: Disease Perturbations from GEO down
Term	Overlap	P-value	Adjusted P-value	Old P-value	Old Adjusted P-value	Odds Ratio	Combined Score	Genes
[truncated: 837 more rows]

## Sheet: Disease Perturbations from GEO up
Term	Overlap	P-value	Adjusted P-value	Old P-value	Old Adjusted P-value	Odds Ratio	Combined Score	Genes
[truncated: 838 more rows]

[truncated: 4 more sheets: DAVID, GAD_DISEASE, DAVID, GAD_DISEASE_CLASS, DrugMatrix, g profiler]
