# Supplementary material for: A tensor decomposition-based integrated analysis applicable to multiple gene expression profiles without sample matching
Source: Research Square preprint supplement (doi:10.21203/rs.3.rs-766884/v1), 2021-08-02
Supplement: Supplementary file 2 [file 6f31fbe05ceb3e99df89f5f6.xlsx]

## Sheet: ensembl gene
1	ENSG00000002834
2	ENSG00000009307
3	ENSG00000011422
4	ENSG00000011600
5	ENSG00000030582
6	ENSG00000034510
7	ENSG00000063177
8	ENSG00000065978
9	ENSG00000067560
10	ENSG00000070756
11	ENSG00000071082
12	ENSG00000072110
13	ENSG00000074800
14	ENSG00000075624
15	ENSG00000080824
16	ENSG00000084070
17	ENSG00000084073
18	ENSG00000084234
19	ENSG00000087086
20	ENSG00000090621
21	ENSG00000092841
22	ENSG00000096384
23	ENSG00000100985
24	ENSG00000102265
25	ENSG00000104904
26	ENSG00000105193
27	ENSG00000105372
28	ENSG00000106153
29	ENSG00000108518
30	ENSG00000110321
31	ENSG00000110651
32	ENSG00000111640
33	ENSG00000112306
34	ENSG00000113648
35	ENSG00000115009
36	ENSG00000117000
37	ENSG00000117450
38	ENSG00000117984
39	ENSG00000118785
40	ENSG00000122406
41	ENSG00000122862
42	ENSG00000123349
43	ENSG00000123416
44	ENSG00000124762
45	ENSG00000125538
46	ENSG00000125691
47	ENSG00000126709
48	ENSG00000127022
49	ENSG00000130402
50	ENSG00000130513
51	ENSG00000131236
52	ENSG00000131238
53	ENSG00000131469
54	ENSG00000133048
55	ENSG00000133112
56	ENSG00000133639
57	ENSG00000135404
58	ENSG00000136167
59	ENSG00000136689
60	ENSG00000137154
61	ENSG00000137309
62	ENSG00000137331
63	ENSG00000137818
64	ENSG00000138326
65	ENSG00000139289
66	ENSG00000139318
67	ENSG00000140264
68	ENSG00000142534
69	ENSG00000142669
70	ENSG00000142676
71	ENSG00000142798
72	ENSG00000142937
73	ENSG00000143333
74	ENSG00000143384
75	ENSG00000143761
76	ENSG00000143933
77	ENSG00000143947
78	ENSG00000144136
79	ENSG00000144713
80	ENSG00000145592
81	ENSG00000147065
82	ENSG00000147649
83	ENSG00000147872
84	ENSG00000149273
85	ENSG00000149806
86	ENSG00000150991
87	ENSG00000153187
88	ENSG00000154518
89	ENSG00000155368
90	ENSG00000156482
91	ENSG00000157227
92	ENSG00000158710
93	ENSG00000158869
94	ENSG00000160255
95	ENSG00000161011
96	ENSG00000161016
97	ENSG00000162511
98	ENSG00000163466
99	ENSG00000164587
100	ENSG00000166441
101	ENSG00000166710
102	ENSG00000166913
103	ENSG00000167283
104	ENSG00000167658
105	ENSG00000167996
106	ENSG00000168461
107	ENSG00000169429
108	ENSG00000169439
109	ENSG00000169752
110	ENSG00000170315
111	ENSG00000171858
112	ENSG00000172757
113	ENSG00000172809
114	ENSG00000173660
115	ENSG00000174748
116	ENSG00000175061
117	ENSG00000177600
118	ENSG00000179218
119	ENSG00000182899
120	ENSG00000184009
121	ENSG00000184840
122	ENSG00000196154
123	ENSG00000197746
124	ENSG00000197756
125	ENSG00000197956
126	ENSG00000198034
127	ENSG00000198712
128	ENSG00000198727
129	ENSG00000198763
130	ENSG00000198786
131	ENSG00000198804
132	ENSG00000198840
133	ENSG00000198886
134	ENSG00000198888
135	ENSG00000198899
136	ENSG00000198938
137	ENSG00000204628
138	ENSG00000206503
139	ENSG00000210049
140	ENSG00000210082
141	ENSG00000211459
142	ENSG00000213741
143	ENSG00000221983
144	ENSG00000228253
145	ENSG00000231500
146	ENSG00000234745
147	ENSG00000251562

## Sheet: gene symbol
From	To	Species	Gene Name
ENSG00000127022	CANX	Homo sapiens	calnexin(CANX)
ENSG00000074800	ENO1	Homo sapiens	enolase 1(ENO1)
ENSG00000142937	RPS8	Homo sapiens	ribosomal protein S8(RPS8)
ENSG00000167283	ATP5L	Homo sapiens	ATP synthase, H+ transporting, mitochondrial Fo complex subunit G(ATP5L)
ENSG00000009307	CSDE1	Homo sapiens	cold shock domain containing E1(CSDE1)
ENSG00000034510	TMSB10	Homo sapiens	thymosin beta 10(TMSB10)
ENSG00000117450	PRDX1	Homo sapiens	peroxiredoxin 1(PRDX1)
ENSG00000123349	PFDN5	Homo sapiens	prefoldin subunit 5(PFDN5)
ENSG00000100985	MMP9	Homo sapiens	matrix metallopeptidase 9(MMP9)
ENSG00000105193	RPS16	Homo sapiens	ribosomal protein S16(RPS16)
ENSG00000166913	YWHAB	Homo sapiens	tyrosine 3-monooxygenase/tryptophan 5-monooxygenase activation protein beta(YWHAB)
ENSG00000160255	ITGB2	Homo sapiens	integrin subunit beta 2(ITGB2)
ENSG00000142669	SH3BGRL3	Homo sapiens	SH3 domain binding glutamate rich protein like 3(SH3BGRL3)
ENSG00000175061	LRRC75A-AS1	Homo sapiens	LRRC75A antisense RNA 1(LRRC75A-AS1)
ENSG00000067560	RHOA	Homo sapiens	ras homolog family member A(RHOA)
ENSG00000075624	ACTB	Homo sapiens	actin beta(ACTB)
ENSG00000113648	h2afy	Homo sapiens	H2A histone family member Y(H2AFY)
ENSG00000072110	ACTN1	Homo sapiens	actinin alpha 1(ACTN1)
ENSG00000196154	S100A4	Homo sapiens	S100 calcium binding protein A4(S100A4)
ENSG00000138326	RPS24	Homo sapiens	ribosomal protein S24(RPS24)
ENSG00000228253	ATP8	Homo sapiens	ATP synthase F0 subunit 8(ATP8)
ENSG00000154518	ATP5G3	Homo sapiens	ATP synthase, H+ transporting, mitochondrial Fo complex subunit C3 (subunit 9)(ATP5G3)
ENSG00000110651	CD81	Homo sapiens	CD81 molecule(CD81)
ENSG00000158710	TAGLN2	Homo sapiens	transgelin 2(TAGLN2)
ENSG00000096384	HSP90AB1	Homo sapiens	heat shock protein 90 alpha family class B member 1(HSP90AB1)
ENSG00000157227	MMP14	Homo sapiens	matrix metallopeptidase 14(MMP14)
ENSG00000172757	CFL1	Homo sapiens	cofilin 1(CFL1)
ENSG00000144713	RPL32	Homo sapiens	ribosomal protein L32(RPL32)
ENSG00000169752	NRG4	Homo sapiens	neuregulin 4(NRG4)
ENSG00000125538	IL1B	Homo sapiens	interleukin 1 beta(IL1B)
ENSG00000221983	UBA52	Homo sapiens	ubiquitin A-52 residue ribosomal protein fusion product 1(UBA52)
ENSG00000106153	CHCHD2	Homo sapiens	coiled-coil-helix-coiled-coil-helix domain containing 2(CHCHD2)
ENSG00000164587	RPS14	Homo sapiens	ribosomal protein S14(RPS14)
ENSG00000142534	RPS11	Homo sapiens	ribosomal protein S11(RPS11)
ENSG00000149273	RPS3	Homo sapiens	ribosomal protein S3(RPS3)
ENSG00000131469	RPL27	Homo sapiens	ribosomal protein L27(RPL27)
ENSG00000145592	RPL37	Homo sapiens	ribosomal protein L37(RPL37)
ENSG00000198763	ND2	Homo sapiens	MTND2(ND2)
ENSG00000198886	ND4	Homo sapiens	NADH dehydrogenase, subunit 4 (complex I)(ND4)
ENSG00000110321	EIF4G2	Homo sapiens	eukaryotic translation initiation factor 4 gamma 2(EIF4G2)
ENSG00000198888	ND1	Homo sapiens	NADH dehydrogenase, subunit 1 (complex I)(ND1)
ENSG00000197956	S100A6	Homo sapiens	S100 calcium binding protein A6(S100A6)
ENSG00000198804	COX1	Homo sapiens	cytochrome c oxidase subunit I(COX1)
ENSG00000156482	RPL30	Homo sapiens	ribosomal protein L30(RPL30)
ENSG00000063177	RPL18	Homo sapiens	ribosomal protein L18(RPL18)
ENSG00000172809	RPL38	Homo sapiens	ribosomal protein L38(RPL38)
ENSG00000105372	RPS19	Homo sapiens	ribosomal protein S19(RPS19)
ENSG00000251562	MALAT1	Homo sapiens	metastasis associated lung adenocarcinoma transcript 1 (non-protein coding)(MALAT1)
ENSG00000184009	ACTG1	Homo sapiens	actin gamma 1(ACTG1)
ENSG00000143333	RGS16	Homo sapiens	regulator of G-protein signaling 16(RGS16)
ENSG00000102265	TIMP1	Homo sapiens	TIMP metallopeptidase inhibitor 1(TIMP1)
ENSG00000131236	CAP1	Homo sapiens	adenylate cyclase associated protein 1(CAP1)
ENSG00000131238	PPT1	Homo sapiens	palmitoyl-protein thioesterase 1(PPT1)
ENSG00000108518	PFN1	Homo sapiens	profilin 1(PFN1)
ENSG00000092841	MYL6	Homo sapiens	myosin light chain 6(MYL6)
ENSG00000111640	GAPDH	Homo sapiens	glyceraldehyde-3-phosphate dehydrogenase(GAPDH)
ENSG00000179218	CALR	Homo sapiens	calreticulin(CALR)
ENSG00000117984	CTSD	Homo sapiens	cathepsin D(CTSD)
ENSG00000071082	RPL31	Homo sapiens	ribosomal protein L31(RPL31)
ENSG00000118785	SPP1	Homo sapiens	secreted phosphoprotein 1(SPP1)
ENSG00000147649	MTDH	Homo sapiens	metadherin(MTDH)
ENSG00000167996	FTH1	Homo sapiens	ferritin heavy chain 1(FTH1)
ENSG00000137331	IER3	Homo sapiens	immediate early response 3(IER3)
ENSG00000161011	SQSTM1	Homo sapiens	sequestosome 1(SQSTM1)
ENSG00000122406	RPL5	Homo sapiens	ribosomal protein L5(RPL5)
ENSG00000144136	SLC20A1	Homo sapiens	solute carrier family 20 member 1(SLC20A1)
ENSG00000161016	MIR6850	Homo sapiens	microRNA 6850(MIR6850)
ENSG00000011422	PLAUR	Homo sapiens	plasminogen activator, urokinase receptor(PLAUR)
ENSG00000002834	LASP1	Homo sapiens	LIM and SH3 protein 1(LASP1)
ENSG00000213741	LOC100288910	Homo sapiens	uncharacterized LOC100288910(LOC100288910)
ENSG00000135404	CD63	Homo sapiens	CD63 molecule(CD63)
ENSG00000130513	GDF15	Homo sapiens	growth differentiation factor 15(GDF15)
ENSG00000137309	HMGA1	Homo sapiens	high mobility group AT-hook 1(HMGA1)
ENSG00000198786	ND5	Homo sapiens	NADH dehydrogenase, subunit 5 (complex I)(ND5)
ENSG00000104904	OAZ1	Homo sapiens	ornithine decarboxylase antizyme 1(OAZ1)
ENSG00000177600	RPLP2	Homo sapiens	ribosomal protein lateral stalk subunit P2(RPLP2)
ENSG00000065978	YBX1	Homo sapiens	Y-box binding protein 1(YBX1)
ENSG00000198938	COX3	Homo sapiens	cytochrome c oxidase III(COX3)
ENSG00000171858	RPS21	Homo sapiens	ribosomal protein S21(RPS21)
ENSG00000139289	PHLDA1	Homo sapiens	pleckstrin homology like domain family A member 1(PHLDA1)
ENSG00000147872	PLIN2	Homo sapiens	perilipin 2(PLIN2)
ENSG00000166710	B2M	Homo sapiens	beta-2-microglobulin(B2M)
ENSG00000169429	CXCL8	Homo sapiens	C-X-C motif chemokine ligand 8(CXCL8)
ENSG00000070756	MIR7705	Homo sapiens	microRNA 7705(MIR7705)
ENSG00000162511	LAPTM5	Homo sapiens	lysosomal protein transmembrane 5(LAPTM5)
ENSG00000087086	FTL	Homo sapiens	ferritin light chain(FTL)
ENSG00000155368	DBI	Homo sapiens	diazepam binding inhibitor, acyl-CoA binding protein(DBI)
ENSG00000125691	RPL23	Homo sapiens	ribosomal protein L23(RPL23)
ENSG00000153187	HNRNPU	Homo sapiens	heterogeneous nuclear ribonucleoprotein U(HNRNPU)
ENSG00000130402	ACTN4	Homo sapiens	actinin alpha 4(ACTN4)
ENSG00000147065	MSN	Homo sapiens	moesin(MSN)
ENSG00000133639	BTG1	Homo sapiens	BTG anti-proliferation factor 1(BTG1)
ENSG00000168461	RAB31	Homo sapiens	RAB31, member RAS oncogene family(RAB31)
ENSG00000198899	ATP6	Homo sapiens	ATP synthase F0 subunit 6(ATP6)
ENSG00000150991	UBC	Homo sapiens	ubiquitin C(UBC)
ENSG00000133112	TPT1	Homo sapiens	tumor protein, translationally-controlled 1(TPT1)
ENSG00000149806	FAU	Homo sapiens	FAU, ubiquitin like and ribosomal protein S30 fusion(FAU)
ENSG00000030582	GRN	Homo sapiens	granulin precursor(GRN)
ENSG00000011600	TYROBP	Homo sapiens	TYRO protein tyrosine kinase binding protein(TYROBP)
ENSG00000117000	RLF	Homo sapiens	rearranged L-myc fusion(RLF)
ENSG00000126709	IFI6	Homo sapiens	interferon alpha inducible protein 6(IFI6)
ENSG00000137154	RPS6	Homo sapiens	ribosomal protein S6(RPS6)
ENSG00000166441	RPL27A	Homo sapiens	ribosomal protein L27a(RPL27A)
ENSG00000231500	RPS18	Homo sapiens	ribosomal protein S18(RPS18)
ENSG00000143947	RPS27A	Homo sapiens	ribosomal protein S27a(RPS27A)
ENSG00000143384	MCL1	Homo sapiens	BCL2 family apoptosis regulator(MCL1)
ENSG00000167658	EEF2	Homo sapiens	eukaryotic translation elongation factor 2(EEF2)
ENSG00000204628	RACK1	Homo sapiens	receptor for activated C kinase 1(RACK1)
ENSG00000122862	SRGN	Homo sapiens	serglycin(SRGN)
ENSG00000169439	SDC2	Homo sapiens	syndecan 2(SDC2)
ENSG00000124762	CDKN1A	Homo sapiens	cyclin dependent kinase inhibitor 1A(CDKN1A)
ENSG00000182899	RPL35A	Homo sapiens	ribosomal protein L35a(RPL35A)
ENSG00000158869	FCER1G	Homo sapiens	Fc fragment of IgE receptor Ig(FCER1G)
ENSG00000173660	Uqcrh	Homo sapiens	ubiquinol-cytochrome c reductase hinge protein(UQCRH)
ENSG00000198840	ND3	Homo sapiens	NADH dehydrogenase, subunit 3 (complex I)(ND3)
ENSG00000112306	RPS12	Homo sapiens	ribosomal protein S12(RPS12)
ENSG00000197756	RPL37A	Homo sapiens	ribosomal protein L37a(RPL37A)
ENSG00000133048	CHI3L1	Homo sapiens	chitinase 3 like 1(CHI3L1)
ENSG00000198727	CYTB	Homo sapiens	cytochrome b(CYTB)
ENSG00000080824	HSP90AA1	Homo sapiens	heat shock protein 90 alpha family class A member 1(HSP90AA1)
ENSG00000140264	SERF2	Homo sapiens	small EDRK-rich factor 2(SERF2)
ENSG00000174748	RPL15	Homo sapiens	ribosomal protein L15(RPL15)
ENSG00000143933	CALM2	Homo sapiens	calmodulin 2(CALM2)
ENSG00000084234	APLP2	Homo sapiens	amyloid beta precursor like protein 2(APLP2)
ENSG00000234745	HLA-B	Homo sapiens	major histocompatibility complex, class I, B(HLA-B)
ENSG00000090621	PABPC4	Homo sapiens	poly(A) binding protein cytoplasmic 4(PABPC4)
ENSG00000184840	TMED9	Homo sapiens	transmembrane p24 trafficking protein 9(TMED9)
ENSG00000084070	SMAP2	Homo sapiens	small ArfGAP2(SMAP2)
ENSG00000163466	ARPC2	Homo sapiens	actin related protein 2/3 complex subunit 2(ARPC2)
ENSG00000084073	ZMPSTE24	Homo sapiens	zinc metallopeptidase STE24(ZMPSTE24)
ENSG00000137818	RPLP1	Homo sapiens	ribosomal protein lateral stalk subunit P1(RPLP1)
ENSG00000198034	RPS4X	Homo sapiens	ribosomal protein S4, X-linked(RPS4X)
ENSG00000115009	CCL20	Homo sapiens	C-C motif chemokine ligand 20(CCL20)
ENSG00000139318	DUSP6	Homo sapiens	dual specificity phosphatase 6(DUSP6)
ENSG00000136167	LCP1	Homo sapiens	lymphocyte cytosolic protein 1(LCP1)
ENSG00000198712	COX2	Homo sapiens	cytochrome c oxidase subunit II(COX2)
ENSG00000197746	PSAP	Homo sapiens	prosaposin(PSAP)
ENSG00000136689	IL1RN	Homo sapiens	interleukin 1 receptor antagonist(IL1RN)
ENSG00000170315	UBB	Homo sapiens	ubiquitin B(UBB)
ENSG00000206503	hla-a	Homo sapiens	major histocompatibility complex, class I, A(HLA-A)
ENSG00000123416	TUBA1B	Homo sapiens	tubulin alpha 1b(TUBA1B)
ENSG00000142798	HSPG2	Homo sapiens	heparan sulfate proteoglycan 2(HSPG2)
ENSG00000143761	MIR3620	Homo sapiens	microRNA 3620(MIR3620)
ENSG00000142676	RPL11	Homo sapiens	ribosomal protein L11(RPL11)

## Sheet: KEGG 2021 Human
Term	Overlap	P-value	Adjusted P-value	Old P-value	Old Adjusted P-value	Odds Ratio	Combined Score	Genes
Ribosome	31/158	5.55007e-36	1.02676e-33	0	0	42.2412	3429.11	RPL5;RPL30;RPL32;RPL31;RPLP1;RPL11;RPS4X;RPS14;RPS16;RPS19;RPS18;RPS3;RPLP2;RPL38;RPL37;RPL15;RPS11;RPL18;RPS27A;RPS12;RPS8;RPL23;RPS6;RPL35A;RPL27A;RPL37A;RPL27;FAU;UBA52;RPS21;RPS24
Coronavirus disease	33/232	1.98152e-33	1.83291e-31	0	0	29.103	2191.5	RPL5;RPL30;CXCL8;RPL32;RPL31;RPLP1;RPL11;RPS4X;RPS14;RPS16;RPS19;RPS18;RPS3;RPLP2;RPL38;RPL37;RPL15;RPS11;RPL18;RPS27A;RPS12;RPS8;RPL23;RPS6;RPL35A;RPL27A;IL1B;RPL37A;RPL27;FAU;UBA52;RPS21;RPS24
Parkinson disease	18/249	2.85281e-13	1.75923e-11	0	0	12.0405	347.793	ATP8;ATP6;UQCRH;TUBA1B;UBB;UBC;COX3;COX2;ND1;COX1;CYTB;ND3;RPS27A;UBA52;ND2;CALM2;ND5;ND4
Diabetic cardiomyopathy	15/203	2.22326e-11	1.02826e-09	0	0	12.0706	296.085	ATP8;ATP6;MMP9;UQCRH;COX3;COX2;ND1;COX1;CYTB;ND3;ND2;CTSD;GAPDH;ND5;ND4
Thermogenesis	15/232	1.47543e-10	4.96839e-09	0	0	10.442	236.376	ATP8;RPS6;ATP6;ACTB;UQCRH;ACTG1;COX3;COX2;ND1;COX1;CYTB;ND3;ND2;ND5;ND4
Amyotrophic lateral sclerosis	18/364	1.61137e-10	4.96839e-09	0	0	7.99149	180.198	ATP8;ATP6;ACTB;UQCRH;ACTG1;TUBA1B;NRG4;COX3;COX2;ND1;COX1;CYTB;PFN1;ND3;ND2;SQSTM1;ND5;ND4
Oxidative phosphorylation	12/133	2.41109e-10	5.75711e-09	0	0	14.715	325.874	ATP8;ATP6;COX3;COX2;ND1;COX1;CYTB;ND3;ND2;ND5;UQCRH;ND4
Pathways of neurodegeneration	20/475	2.48956e-10	5.75711e-09	0	0	6.82198	150.859	ATP8;ATP6;UQCRH;TUBA1B;UBB;IL1B;UBC;COX3;COX2;ND1;COX1;CYTB;ND3;RPS27A;UBA52;ND2;SQSTM1;CALM2;ND5;ND4
Shigellosis	14/246	3.27081e-09	6.72333e-08	0	0	9.03929	176.612	CXCL8;ACTN1;ACTN4;ACTB;RHOA;ACTG1;UBB;ARPC2;IL1B;UBC;PFN1;RPS27A;UBA52;SQSTM1
Alzheimer disease	16/369	1.16226e-08	2.07896e-07	0	0	6.85227	125.193	ATP8;ATP6;UQCRH;TUBA1B;IL1B;COX3;COX2;ND1;COX1;CYTB;ND3;ND2;CALM2;GAPDH;ND5;ND4
Prion disease	14/273	1.23614e-08	2.07896e-07	0	0	8.08583	147.232	ATP8;ATP6;UQCRH;TUBA1B;IL1B;COX3;COX2;ND1;COX1;CYTB;ND3;ND2;ND5;ND4
Fluid shear stress and atherosclerosis	10/139	7.04863e-08	1.08666e-06	0	0	11.327	186.532	HSP90AA1;HSP90AB1;SDC2;IL1B;SQSTM1;CALM2;MMP9;ACTB;RHOA;ACTG1
Salmonella infection	12/249	2.78473e-07	3.96288e-06	0	0	7.46854	112.73	TUBA1B;HSP90AA1;HSP90AB1;CXCL8;ARPC2;IL1B;RPS3;PFN1;GAPDH;ACTB;RHOA;ACTG1
Proteoglycans in cancer	11/205	3.06366e-07	4.04841e-06	0	0	8.3194	124.778	CD63;CDKN1A;SDC2;RPS6;PLAUR;MSN;HSPG2;MMP9;ACTB;RHOA;ACTG1
Huntington disease	13/306	3.70764e-07	4.57276e-06	0	0	6.57529	97.365	ATP8;ATP6;UQCRH;TUBA1B;COX3;COX2;ND1;COX1;CYTB;ND3;ND2;ND5;ND4
Antigen processing and presentation	7/78	1.56461e-06	1.80908e-05	0	0	14.1343	188.946	HSP90AA1;HSP90AB1;CANX;HLA-B;HLA-A;CALR;B2M
Leukocyte transendothelial migration	8/114	1.8105e-06	1.97025e-05	0	0	10.8795	143.848	ACTN1;ITGB2;MSN;ACTN4;MMP9;ACTB;RHOA;ACTG1
Tight junction	9/169	4.02576e-06	4.13758e-05	0	0	8.14591	101.195	MYL6;TUBA1B;ARPC2;ACTN1;MSN;ACTN4;ACTB;RHOA;ACTG1
Regulation of actin cytoskeleton	10/218	4.41131e-06	4.29522e-05	0	0	6.99679	86.2798	ARPC2;ACTN1;CFL1;ITGB2;MSN;ACTN4;PFN1;ACTB;RHOA;ACTG1
Viral myocarditis	6/60	4.74774e-06	4.39166e-05	0	0	15.8281	194.019	ITGB2;HLA-B;HLA-A;ACTB;EIF4G2;ACTG1
Kaposi sarcoma-associated herpesvirus infection	9/193	1.18034e-05	0.000103982	0	0	7.07477	80.2783	CDKN1A;CXCL8;UBB;UBC;HLA-B;HLA-A;RPS27A;UBA52;CALM2
Pathogenic Escherichia coli infection	9/197	1.39079e-05	0.000116952	0	0	6.92283	77.4184	TUBA1B;CXCL8;ARPC2;IL1B;RPS3;GAPDH;ACTB;RHOA;ACTG1
Phagosome	8/152	1.53001e-05	0.000123066	0	0	7.99311	88.6248	TUBA1B;ITGB2;CANX;HLA-B;HLA-A;CALR;ACTB;ACTG1
Pertussis	6/76	1.88515e-05	0.000145314	0	0	12.2004	132.727	CXCL8;IL1B;ITGB2;CFL1;CALM2;RHOA
Malaria	5/50	3.0455e-05	0.000225367	0	0	15.7222	163.499	CXCL8;CD81;IL1B;SDC2;ITGB2
Human cytomegalovirus infection	9/225	3.96777e-05	0.000282322	0	0	6.01685	60.9791	CDKN1A;CXCL8;IL1B;HLA-B;HLA-A;CALR;B2M;CALM2;RHOA
IL-17 signaling pathway	6/94	6.30964e-05	0.000432328	0	0	9.69604	93.7689	HSP90AA1;CXCL8;HSP90AB1;CCL20;IL1B;MMP9
Amoebiasis	6/102	9.95159e-05	0.000657516	0	0	8.88444	81.8718	CXCL8;ACTN1;PRDX1;IL1B;ITGB2;ACTN4
Oxytocin signaling pathway	7/154	0.000133041	0.000826529	0	0	6.80055	60.6939	MYL6;CDKN1A;EEF2;CALM2;ACTB;RHOA;ACTG1
Mitophagy	5/68	0.000134958	0.000826529	0	0	11.22	99.976	UBB;UBC;RPS27A;SQSTM1;UBA52
Non-alcoholic fatty liver disease	7/155	0.0001385	0.000826529	0	0	6.75426	60.0092	CXCL8;IL1B;COX3;COX2;COX1;CYTB;UQCRH
Adherens junction	5/71	0.000165656	0.000957699	0	0	10.7083	93.2224	ACTN1;ACTN4;ACTB;RHOA;ACTG1
Cardiac muscle contraction	5/87	0.000428502	0.00240221	0	0	8.61193	66.7874	COX3;COX2;COX1;CYTB;UQCRH
Yersinia infection	6/137	0.000493804	0.00268687	0	0	6.4992	49.4809	CXCL8;ARPC2;IL1B;ACTB;RHOA;ACTG1
Viral carcinogenesis	7/203	0.000709506	0.00375025	0	0	5.08773	36.8909	CDKN1A;YWHAB;ACTN1;HLA-B;ACTN4;HLA-A;RHOA
Cellular senescence	6/156	0.000975551	0.00496512	0	0	5.6705	39.3108	CDKN1A;CXCL8;HLA-B;HLA-A;SQSTM1;CALM2
Lipid and atherosclerosis	7/215	0.000993023	0.00496512	0	0	4.79128	33.1306	HSP90AA1;HSP90AB1;CXCL8;IL1B;CALM2;MMP9;RHOA
Necroptosis	6/159	0.00107651	0.00524088	0	0	5.55847	37.9868	HSP90AA1;HSP90AB1;FTH1;IL1B;SQSTM1;FTL
Human T-cell leukemia virus 1 infection	7/219	0.00110513	0.00524226	0	0	4.69992	31.9961	CDKN1A;ITGB2;CANX;HLA-B;HLA-A;CALR;B2M
HIF-1 signaling pathway	5/109	0.00119312	0.00551817	0	0	6.78262	45.6551	CDKN1A;RPS6;ENO1;TIMP1;GAPDH
Tuberculosis	6/180	0.00202534	0.00913872	0	0	4.88241	30.2808	FCER1G;IL1B;ITGB2;CALM2;CTSD;RHOA
Bacterial invasion of epithelial cells	4/77	0.00238071	0.0104195	0	0	7.68755	46.4356	ARPC2;ACTB;RHOA;ACTG1
Lysosome	5/128	0.00242182	0.0104195	0	0	5.72938	34.5094	CD63;PSAP;PPT1;LAPTM5;CTSD
Natural killer cell mediated cytotoxicity	5/131	0.00267764	0.0112583	0	0	5.59212	33.1211	TYROBP;FCER1G;ITGB2;HLA-B;HLA-A
Estrogen signaling pathway	5/137	0.00324722	0.0130799	0	0	5.33631	30.5768	HSP90AA1;HSP90AB1;CALM2;CTSD;MMP9
Bladder cancer	3/41	0.00325231	0.0130799	0	0	11.0176	63.1131	CDKN1A;CXCL8;MMP9
Graft-versus-host disease	3/42	0.00348406	0.0134989	0	0	10.7346	60.7528	IL1B;HLA-B;HLA-A
Focal adhesion	6/201	0.00350241	0.0134989	0	0	4.35196	24.6073	ACTN1;SPP1;ACTN4;ACTB;RHOA;ACTG1
Type I diabetes mellitus	3/43	0.00372568	0.0140032	0	0	10.4657	58.5293	IL1B;HLA-B;HLA-A
Apoptosis	5/142	0.00378465	0.0140032	0	0	5.14025	28.6662	TUBA1B;CTSD;ACTB;ACTG1;MCL1
Rap1 signaling pathway	6/210	0.00433532	0.0157261	0	0	4.15806	22.6239	ITGB2;PFN1;CALM2;ACTB;RHOA;ACTG1
Retrograde endocannabinoid signaling	5/148	0.00451038	0.0158427	0	0	4.92308	26.5914	ND1;ND3;ND2;ND5;ND4
Human immunodeficiency virus 1 infection	6/212	0.00453871	0.0158427	0	0	4.11727	22.2132	CFL1;HLA-B;HLA-A;CALR;B2M;CALM2
Rheumatoid arthritis	4/93	0.00469912	0.0160988	0	0	6.30042	33.7727	CXCL8;CCL20;IL1B;ITGB2
Prostate cancer	4/97	0.00545402	0.0183453	0	0	6.02822	31.4155	CDKN1A;HSP90AA1;HSP90AB1;MMP9
Hepatitis B	5/162	0.00658035	0.0217387	0	0	4.48089	22.5105	CDKN1A;CXCL8;YWHAB;HSPG2;MMP9
C-type lectin receptor signaling pathway	4/104	0.00696252	0.0225977	0	0	5.60426	27.8375	FCER1G;IL1B;CALM2;RHOA
Legionellosis	3/57	0.00820654	0.026176	0	0	7.74687	37.2069	CXCL8;IL1B;ITGB2
TNF signaling pathway	4/112	0.00899733	0.028212	0	0	5.18702	24.4352	MMP14;CCL20;IL1B;MMP9
Endocytosis	6/252	0.0102526	0.0313801	0	0	3.44078	15.7595	RAB31;ARPC2;HLA-B;HLA-A;SMAP2;RHOA
NOD-like receptor signaling pathway	5/181	0.0103469	0.0313801	0	0	3.9933	18.2536	HSP90AA1;HSP90AB1;CXCL8;IL1B;RHOA
Platelet activation	4/124	0.0127193	0.0379527	0	0	4.66548	20.3631	FCER1G;ACTB;RHOA;ACTG1
PI3K-Akt signaling pathway	7/354	0.0148382	0.0435726	0	0	2.85169	12.0072	CDKN1A;HSP90AA1;HSP90AB1;YWHAB;RPS6;SPP1;MCL1
Epstein-Barr virus infection	5/202	0.0159887	0.0462172	0	0	3.56381	14.7395	CDKN1A;HLA-B;HLA-A;CALR;B2M
PPAR signaling pathway	3/74	0.0166346	0.0473445	0	0	5.88693	24.1145	UBC;DBI;PLIN2
Gastric acid secretion	3/76	0.0178527	0.0500417	0	0	5.72506	23.0468	CALM2;ACTB;ACTG1
Ubiquitin mediated proteolysis	4/140	0.0190333	0.0525546	0	0	4.11327	16.295	UBB;UBC;RPS27A;UBA52
RNA degradation	3/79	0.0197709	0.0537883	0	0	5.49824	21.5726	BTG1;PABPC4;ENO1
Cell adhesion molecules	4/148	0.0228044	0.0611422	0	0	3.88318	14.6815	SDC2;ITGB2;HLA-B;HLA-A
Allograft rejection	2/38	0.0309513	0.0808465	0	0	7.69969	26.759	HLA-B;HLA-A
Hippo signaling pathway	4/163	0.0310276	0.0808465	0	0	3.51416	12.2043	YWHAB;ITGB2;ACTB;ACTG1
Ferroptosis	2/41	0.0355996	0.0913374	0	0	7.10633	23.7026	FTH1;FTL
Protein processing in endoplasmic reticulum	4/171	0.0360413	0.0913374	0	0	3.34446	11.1139	HSP90AA1;HSP90AB1;CANX;CALR
Influenza A	4/172	0.036699	0.0917475	0	0	3.32438	10.9871	CXCL8;IL1B;ACTB;ACTG1
Chagas disease	3/102	0.0381039	0.0939897	0	0	4.21596	13.7754	CXCL8;IL1B;CALR
Toll-like receptor signaling pathway	3/104	0.039998	0.0973637	0	0	4.13206	13.3008	CXCL8;IL1B;SPP1
Parathyroid hormone synthesis, secretion and action	3/106	0.0419392	0.100763	0	0	4.05142	12.8492	CDKN1A;MMP14;RHOA
Th17 cell differentiation	3/107	0.0429272	0.101815	0	0	4.01226	12.6316	HSP90AA1;HSP90AB1;IL1B
Vibrio cholerae infection	2/50	0.050998	0.118649	0	0	5.77127	17.1751	ACTB;ACTG1
Transcriptional misregulation in cancer	4/192	0.0513077	0.118649	0	0	2.96771	8.81384	CDKN1A;CXCL8;MMP9;DUSP6
Sphingolipid signaling pathway	3/119	0.0556789	0.127168	0	0	3.59501	10.3829	FCER1G;CTSD;RHOA
Autoimmune thyroid disease	2/53	0.056574	0.127636	0	0	5.43096	15.5988	HLA-B;HLA-A
Cytokine-cytokine receptor interaction	5/295	0.0639228	0.142479	0	0	2.40948	6.62627	IL1RN;CXCL8;GDF15;CCL20;IL1B
Osteoclast differentiation	3/127	0.0650694	0.143308	0	0	3.36171	9.1852	TYROBP;IL1B;SQSTM1
Mineral absorption	2/60	0.0703508	0.153116	0	0	4.77381	12.6709	FTH1;FTL
Vascular smooth muscle contraction	3/133	0.0725587	0.156085	0	0	3.20558	8.40939	MYL6;CALM2;RHOA
Apelin signaling pathway	3/137	0.0777564	0.165344	0	0	3.10926	7.94159	RPS6;SPP1;CALM2
Measles	3/139	0.0804152	0.169055	0	0	3.06322	7.72102	IL1B;RACK1;MSN
Glycolysis / Gluconeogenesis	2/67	0.085089	0.17687	0	0	4.2582	10.4925	ENO1;GAPDH
Pathways in cancer	7/531	0.0920657	0.188775	0	0	1.87129	4.46351	CDKN1A;HSP90AA1;HSP90AB1;CXCL8;CALM2;MMP9;RHOA
Phospholipase D signaling pathway	3/148	0.0928568	0.188775	0	0	2.87178	6.82536	CXCL8;FCER1G;RHOA
Glioma	2/75	0.102946	0.207011	0	0	3.79002	8.61679	CDKN1A;CALM2
Hepatitis C	3/157	0.10604	0.209459	0	0	2.70272	6.06474	CDKN1A;CD81;YWHAB
Arrhythmogenic right ventricular cardiomyopathy	2/77	0.10756	0.209459	0	0	3.68858	8.22445	ACTB;ACTG1
Leishmaniasis	2/77	0.10756	0.209459	0	0	3.68858	8.22445	IL1B;ITGB2
Hepatocellular carcinoma	3/168	0.123079	0.237184	0	0	2.52113	5.28158	CDKN1A;ACTB;ACTG1
Complement and coagulation cascades	2/85	0.126534	0.238866	0	0	3.3317	6.88744	ITGB2;PLAUR
ErbB signaling pathway	2/85	0.126534	0.238866	0	0	3.3317	6.88744	CDKN1A;NRG4
Colorectal cancer	2/86	0.128959	0.240985	0	0	3.29187	6.74261	CDKN1A;RHOA
ECM-receptor interaction	2/88	0.133843	0.247609	0	0	3.21499	6.46565	SPP1;HSPG2
Hypertrophic cardiomyopathy	2/90	0.138767	0.254177	0	0	3.14161	6.20455	ACTB;ACTG1
GnRH signaling pathway	2/93	0.146226	0.265215	0	0	3.03758	5.84004	MMP14;CALM2
Terpenoid backbone biosynthesis	1/22	0.147997	0.265819	0	0	6.55886	12.5311	ZMPSTE24
Dilated cardiomyopathy	2/96	0.153767	0.273226	0	0	2.94019	5.50496	ACTB;ACTG1
Fc gamma R-mediated phagocytosis	2/97	0.156297	0.273226	0	0	2.90909	5.39926	ARPC2;CFL1
Neutrophil extracellular trap formation	3/189	0.158084	0.273226	0	0	2.2341	4.12108	ITGB2;ACTB;ACTG1
Inflammatory mediator regulation of TRP channels	2/98	0.158836	0.273226	0	0	2.87864	5.29637	IL1B;CALM2
Chemokine signaling pathway	3/192	0.163317	0.273226	0	0	2.1983	3.98346	CXCL8;CCL20;RHOA
AGE-RAGE signaling pathway in diabetic complications	2/100	0.163935	0.273226	0	0	2.81961	5.09865	CXCL8;IL1B
Viral protein interaction with cytokine and cytokine receptor	2/100	0.163935	0.273226	0	0	2.81961	5.09865	CXCL8;CCL20
Progesterone-mediated oocyte maturation	2/100	0.163935	0.273226	0	0	2.81961	5.09865	HSP90AA1;HSP90AB1
NF-kappa B signaling pathway	2/104	0.17422	0.287774	0	0	2.70849	4.73291	CXCL8;IL1B
Fatty acid elongation	1/27	0.178473	0.292191	0	0	5.29621	9.12704	PPT1
Phototransduction	1/28	0.184437	0.299306	0	0	5.09979	8.62092	CALM2
MicroRNAs in cancer	4/310	0.188319	0.302948	0	0	1.81236	3.02594	CDKN1A;MMP9;RHOA;MCL1
Asthma	1/31	0.202073	0.322272	0	0	4.58912	7.33858	FCER1G
Neurotrophin signaling pathway	2/119	0.213576	0.337706	0	0	2.35945	3.64243	CALM2;RHOA
Thyroid hormone signaling pathway	2/121	0.218893	0.341541	0	0	2.31956	3.52382	ACTB;ACTG1
Human papillomavirus infection	4/331	0.219694	0.341541	0	0	1.69415	2.56751	CDKN1A;HLA-B;SPP1;HLA-A
Cell cycle	2/124	0.22689	0.349788	0	0	2.26218	3.35547	CDKN1A;YWHAB
African trypanosomiasis	1/37	0.236216	0.358196	0	0	3.82311	5.51678	IL1B
Thyroid cancer	1/37	0.236216	0.358196	0	0	3.82311	5.51678	CDKN1A
Oocyte meiosis	2/129	0.240262	0.361369	0	0	2.17257	3.09814	YWHAB;CALM2
Systemic lupus erythematosus	2/135	0.256356	0.382467	0	0	2.07393	2.823	ACTN1;ACTN4
Autophagy	2/137	0.261727	0.384282	0	0	2.04299	2.73854	SQSTM1;CTSD
Insulin signaling pathway	2/137	0.261727	0.384282	0	0	2.04299	2.73854	RPS6;CALM2
Herpes simplex virus 1 infection	5/498	0.294319	0.428733	0	0	1.40264	1.71555	IL1B;HLA-B;HLA-A;CALR;B2M
Sphingolipid metabolism	1/49	0.300209	0.433896	0	0	2.8656	3.44811	PSAP
mTOR signaling pathway	2/154	0.307314	0.440722	0	0	1.81294	2.13906	RPS6;RHOA
JAK-STAT signaling pathway	2/162	0.328613	0.467641	0	0	1.72159	1.91592	CDKN1A;MCL1
cGMP-PKG signaling pathway	2/167	0.341838	0.482748	0	0	1.669	1.79153	CALM2;RHOA
Endometrial cancer	1/58	0.344683	0.483078	0	0	2.41204	2.56914	CDKN1A
Basal cell carcinoma	1/63	0.368165	0.506397	0	0	2.21696	2.21524	CDKN1A
Cytosolic DNA-sensing pathway	1/63	0.368165	0.506397	0	0	2.21696	2.21524	IL1B
GnRH secretion	1/64	0.372761	0.506397	0	0	2.18166	2.1529	SPP1
Inflammatory bowel disease	1/65	0.377323	0.506397	0	0	2.14746	2.09303	IL1B
Axon guidance	2/182	0.380983	0.506397	0	0	1.52875	1.47524	CFL1;RHOA
Acute myeloid leukemia	1/67	0.386348	0.506397	0	0	2.08218	1.98018	DUSP6
Long-term potentiation	1/67	0.386348	0.506397	0	0	2.08218	1.98018	CALM2
Fc epsilon RI signaling pathway	1/68	0.390812	0.506397	0	0	2.051	1.92697	FCER1G
RNA transport	2/186	0.391263	0.506397	0	0	1.49521	1.40307	PABPC4;EIF4G2
Amphetamine addiction	1/69	0.395244	0.506397	0	0	2.02073	1.87575	CALM2
Renal cell carcinoma	1/69	0.395244	0.506397	0	0	2.02073	1.87575	CDKN1A
Renin secretion	1/69	0.395244	0.506397	0	0	2.02073	1.87575	CALM2
Epithelial cell signaling in Helicobacter pylori infection	1/70	0.399643	0.506397	0	0	1.99134	1.82643	CXCL8
RIG-I-like receptor signaling pathway	1/70	0.399643	0.506397	0	0	1.99134	1.82643	CXCL8
Melanoma	1/72	0.408348	0.510435	0	0	1.93505	1.73311	CDKN1A
Non-small cell lung cancer	1/72	0.408348	0.510435	0	0	1.93505	1.73311	CDKN1A
p53 signaling pathway	1/73	0.412653	0.512354	0	0	1.90808	1.68894	CDKN1A
Thyroid hormone synthesis	1/75	0.421169	0.517734	0	0	1.85633	1.6052	CANX
Chronic myeloid leukemia	1/76	0.425382	0.517734	0	0	1.83148	1.56549	CDKN1A
Pancreatic cancer	1/76	0.425382	0.517734	0	0	1.83148	1.56549	CDKN1A
B cell receptor signaling pathway	1/81	0.445991	0.53927	0	0	1.71658	1.38606	CD81
Peroxisome	1/82	0.450024	0.540613	0	0	1.6953	1.35362	PRDX1
cAMP signaling pathway	2/216	0.465685	0.555818	0	0	1.28364	0.981017	CALM2;RHOA
Gap junction	1/88	0.473616	0.56166	0	0	1.57791	1.17926	TUBA1B
Small cell lung cancer	1/92	0.488783	0.57263	0	0	1.50824	1.07965	CDKN1A
Salivary secretion	1/93	0.492507	0.57263	0	0	1.49177	1.05654	CALM2
TGF-beta signaling pathway	1/94	0.496203	0.57263	0	0	1.47566	1.0341	RHOA
Staphylococcus aureus infection	1/95	0.499873	0.57263	0	0	1.45988	1.01229	ITGB2
Ras signaling pathway	2/232	0.503156	0.57263	0	0	1.19337	0.819674	CALM2;RHOA
Circadian entrainment	1/97	0.507133	0.57263	0	0	1.42933	0.970487	CALM2
Phosphatidylinositol signaling system	1/97	0.507133	0.57263	0	0	1.42933	0.970487	CALM2
Aldosterone synthesis and secretion	1/98	0.510724	0.57263	0	0	1.41452	0.950453	CALM2
mRNA surveillance pathway	1/98	0.510724	0.57263	0	0	1.41452	0.950453	PABPC4
Hematopoietic cell lineage	1/99	0.514288	0.573153	0	0	1.40001	0.930969	IL1B
Chemical carcinogenesis	2/239	0.519014	0.574095	0	0	1.15771	0.759256	HSP90AA1;HSP90AB1
Melanogenesis	1/101	0.521341	0.574095	0	0	1.37187	0.893573	CALM2
Pancreatic secretion	1/102	0.524829	0.574516	0	0	1.35822	0.875624	RHOA
T cell receptor signaling pathway	1/104	0.531729	0.578646	0	0	1.33172	0.84114	RHOA
Glucagon signaling pathway	1/107	0.541893	0.586258	0	0	1.29383	0.792712	CALM2
AMPK signaling pathway	1/120	0.583465	0.627564	0	0	1.15173	0.620517	EEF2
Relaxin signaling pathway	1/129	0.610029	0.652343	0	0	1.07026	0.528974	MMP9
FoxO signaling pathway	1/131	0.615699	0.653847	0	0	1.05369	0.511034	CDKN1A
Dopaminergic synapse	1/132	0.618504	0.653847	0	0	1.04559	0.502355	CALM2
MAPK signaling pathway	2/294	0.631571	0.663867	0	0	0.937015	0.430601	IL1B;DUSP6
Breast cancer	1/147	0.658213	0.684138	0	0	0.937452	0.392068	CDKN1A
Gastric cancer	1/149	0.663187	0.684138	0	0	0.92469	0.379768	CDKN1A
Adrenergic signaling in cardiomyocytes	1/150	0.665648	0.684138	0	0	0.918438	0.373799	CALM2
Spliceosome	1/150	0.665648	0.684138	0	0	0.918438	0.373799	HNRNPU
Cushing syndrome	1/155	0.677683	0.69266	0	0	0.888393	0.345651	CDKN1A
Wnt signaling pathway	1/166	0.702669	0.714251	0	0	0.828704	0.292424	RHOA
Alcoholism	1/186	0.74327	0.751393	0	0	0.738363	0.21907	CALM2
Calcium signaling pathway	1/240	0.827419	0.831916	0	0	0.569967	0.107977	CALM2
Olfactory transduction	1/440	0.960733	0.960733	0	0	0.307137	0.0123036	CALM2

## Sheet: Jensen DISEASES
Term	Overlap	P-value	Adjusted P-value	Old P-value	Old Adjusted P-value	Odds Ratio	Combined Score	Genes
Diamond-Blackfan anemia	6/15	6.2059e-10	1.22595e-07	0	0	95.1847	2017.95	RPL5;RPS19;RPL11;RPL35A;RPL15;RPS24
Arthritis	13/186	1.01318e-09	1.22595e-07	0	0	11.2045	232.047	IL1RN;CCL20;HLA-B;HLA-A;HSPG2;MMP9;MMP14;RPS19;IL1B;SPP1;CHI3L1;TIMP1;B2M
Lung disease	6/119	0.000231902	0.0187068	0	0	7.54135	63.115	IL1RN;IL1B;CHI3L1;TIMP1;B2M;RHOA
Ureteral disease	3/22	0.000519533	0.0303998	0	0	22.0563	166.803	SPP1;S100A4;TIMP1
Progressive supranuclear palsy	3/24	0.000675608	0.0303998	0	0	19.9537	145.66	GRN;UBB;UBA52
Hypertension	8/289	0.0012468	0.0303998	0	0	4.06764	27.201	RPS19;IL1B;SPP1;B2M;CALM2;MMP9;ACTB;RHOA
Hemochromatosis	3/30	0.00131281	0.0303998	0	0	15.5149	102.95	HLA-A;B2M;FTL
Neurodegenerative disease	8/293	0.00136039	0.0303998	0	0	4.00973	26.4642	CHCHD2;GRN;PPT1;PFN1;EEF2;SQSTM1;CTSD;FTL
Spondylolysis	2/8	0.00142039	0.0303998	0	0	46.2681	303.372	RPL32;FTH1
Arthropathy	3/33	0.00173643	0.0303998	0	0	13.9613	88.7367	IL1RN;IL1B;B2M
Degenerative disc disease	3/33	0.00173643	0.0303998	0	0	13.9613	88.7367	FTH1;IL1B;TIMP1
Nasopharynx carcinoma	2/9	0.00181754	0.0303998	0	0	39.6563	250.242	HLA-A;IER3
Urticaria	3/34	0.00189443	0.0303998	0	0	13.5102	84.6934	CD63;IL1RN;TPT1
Periodontitis	3/35	0.00206111	0.0303998	0	0	13.0874	80.939	IL1RN;IL1B;MMP9
Exanthem	3/36	0.00223664	0.0303998	0	0	12.6901	77.4452	IL1RN;IL1B;HSPG2
Uveitis	3/36	0.00223664	0.0303998	0	0	12.6901	77.4452	IL1RN;HLA-B;HLA-A
Muckle-Wells syndrome	2/10	0.00226114	0.0303998	0	0	34.6976	211.374	IL1RN;IL1B
Stevens-Johnson syndrome	2/10	0.00226114	0.0303998	0	0	34.6976	211.374	HLA-B;HSPG2
Mevalonic aciduria	2/11	0.0027505	0.0350327	0	0	30.8407	181.836	IL1RN;IL1B
Neuronal ceroid lipofuscinosis	2/12	0.00328495	0.0397479	0	0	27.7552	158.716	PPT1;CTSD
Theileriasis	2/13	0.00386381	0.0418478	0	0	25.2308	140.185	RPS8;RPS12
Pick's disease	2/13	0.00386381	0.0418478	0	0	25.2308	140.185	GRN;UBB
Candidiasis	3/44	0.00397727	0.0418478	0	0	10.2099	56.4317	HSP90AA1;IL1B;ENO1
inclusion-cell disease	2/14	0.00448643	0.0452382	0	0	23.127	125.041	PSAP;CTSD
Bowen-Conradi syndrome	2/15	0.00515214	0.0498728	0	0	21.347	112.463	RPS19;RPS18
Lymphatic system disease	2/18	0.00740141	0.06889	0	0	17.3418	85.0803	IL1B;B2M
Behcet's disease	2/20	0.00910469	0.081605	0	0	15.4134	72.4269	HLA-B;HLA-A
Osteomyelitis	2/21	0.0100156	0.0865634	0	0	14.6014	67.2192	IL1RN;IL1B
Rhinitis	2/22	0.0109652	0.0915028	0	0	13.8706	62.5985	CD63;IL1B
Allergic hypersensitivity disease	4/123	0.012377	0.0998413	0	0	4.70493	20.6636	CD63;IL1B;HSPG2;TPT1
Oculocutaneous albinism	2/27	0.016273	0.127034	0	0	11.0937	45.6867	CD63;CANX
Hyperphosphatemia	2/30	0.0198845	0.150377	0	0	9.9036	38.8004	SLC20A1;SPP1
Peritonitis	2/32	0.0224608	0.164712	0	0	9.24242	35.0841	IL1B;B2M
Brain ischemia	2/35	0.0265672	0.183979	0	0	8.40093	30.4792	IL1B;MMP9
Leukopenia	2/36	0.0279984	0.183979	0	0	8.15343	29.1535	IL1B;B2M
Metachromatic leukodystrophy	1/4	0.0286881	0.183979	0	0	45.9537	163.194	PSAP
Periodontal disease	2/37	0.0294599	0.183979	0	0	7.92008	27.9161	CCL20;TIMP1
Frontotemporal dementia	2/39	0.0324721	0.183979	0	0	7.49121	25.6752	GRN;SQSTM1
Skin disease	2/41	0.0355996	0.183979	0	0	7.10633	23.7026	HLA-A;MMP9
Melanotic neuroectodermal tumor	1/5	0.0357315	0.183979	0	0	34.4635	114.823	RPLP1
Echolalia	1/5	0.0357315	0.183979	0	0	34.4635	114.823	GRN
Spiradenoma	1/5	0.0357315	0.183979	0	0	34.4635	114.823	PHLDA1
Agraphia	1/5	0.0357315	0.183979	0	0	34.4635	114.823	GRN
Myelofibrosis	1/5	0.0357315	0.183979	0	0	34.4635	114.823	CALR
pseudo-Hurler polydystrophy	1/5	0.0357315	0.183979	0	0	34.4635	114.823	CTSD
Retinitis	1/5	0.0357315	0.183979	0	0	34.4635	114.823	ACTG1
Lipoid proteinosis	1/5	0.0357315	0.183979	0	0	34.4635	114.823	HSPG2
Common cold	2/42	0.0372053	0.184629	0	0	6.92832	22.8032	IL1B;MMP9
Sensorineural hearing loss	3/103	0.0390451	0.184629	0	0	4.17359	13.5351	IL1RN;RPS19;ACTG1
Meningitis	2/44	0.0404986	0.184629	0	0	6.59774	21.1556	IL1B;MMP9
Mouth disease	1/6	0.0427242	0.184629	0	0	27.5694	86.9262	SPP1
Sporotrichosis	1/6	0.0427242	0.184629	0	0	27.5694	86.9262	CALM2
Epidermolysis bullosa acquisita	1/6	0.0427242	0.184629	0	0	27.5694	86.9262	HSP90AA1
Otitis externa	1/6	0.0427242	0.184629	0	0	27.5694	86.9262	CALM2
Invasive aspergillosis	1/6	0.0427242	0.184629	0	0	27.5694	86.9262	CALM2
Dacryoadenitis	1/6	0.0427242	0.184629	0	0	27.5694	86.9262	HSPG2
Sinoatrial node disease	1/7	0.0496665	0.188459	0	0	22.9734	68.9758	MALAT1
Eosinophilic meningitis	1/7	0.0496665	0.188459	0	0	22.9734	68.9758	YWHAB
Farber lipogranulomatosis	1/7	0.0496665	0.188459	0	0	22.9734	68.9758	PSAP
Onchocerciasis	1/7	0.0496665	0.188459	0	0	22.9734	68.9758	CALR
Glomerulonephritis	1/7	0.0496665	0.188459	0	0	22.9734	68.9758	FTH1
Baraitser-Winter syndrome	1/7	0.0496665	0.188459	0	0	22.9734	68.9758	ACTB
Psoriatic arthritis	1/7	0.0496665	0.188459	0	0	22.9734	68.9758	HLA-B
Dementia	3/119	0.0556789	0.188459	0	0	3.59501	10.3829	GRN;TYROBP;IL1B
Erythema multiforme	1/8	0.0565588	0.188459	0	0	19.6905	56.5604	HLA-A
Myelodysplastic syndrome	1/8	0.0565588	0.188459	0	0	19.6905	56.5604	RPS14
Necrotizing fasciitis	1/8	0.0565588	0.188459	0	0	19.6905	56.5604	RPS16
Hemorrhagic disease	1/8	0.0565588	0.188459	0	0	19.6905	56.5604	CALR
Henoch-Schoenlein purpura	1/8	0.0565588	0.188459	0	0	19.6905	56.5604	HSP90AA1
Pigmented villonodular synovitis	1/8	0.0565588	0.188459	0	0	19.6905	56.5604	LAPTM5
Coronary artery disease	4/205	0.0622798	0.188459	0	0	2.77393	7.70076	GDF15;IL1B;SPP1;MMP9
Mood disorder	1/9	0.0634015	0.188459	0	0	17.2283	47.5203	ATP5G3
Herpes zoster	1/9	0.0634015	0.188459	0	0	17.2283	47.5203	RPS24
Hypophosphatasia	1/9	0.0634015	0.188459	0	0	17.2283	47.5203	SPP1
IgA glomerulonephritis	1/9	0.0634015	0.188459	0	0	17.2283	47.5203	HLA-A
Inclusion body myopathy with Paget disease of bone and frontotemporal dementia	1/9	0.0634015	0.188459	0	0	17.2283	47.5203	SQSTM1
Common variable immunodeficiency	1/9	0.0634015	0.188459	0	0	17.2283	47.5203	CD81
Kindler syndrome	1/9	0.0634015	0.188459	0	0	17.2283	47.5203	MSN
SAPHO syndrome	1/9	0.0634015	0.188459	0	0	17.2283	47.5203	IL1RN
Detrusor sphincter dyssynergia	1/9	0.0634015	0.188459	0	0	17.2283	47.5203	RPS24
Sialadenitis	1/9	0.0634015	0.188459	0	0	17.2283	47.5203	HSPG2
Toxic encephalopathy	3/126	0.0638579	0.188459	0	0	3.38921	9.32405	IL1B;CALM2;GAPDH
Vasculitis	2/58	0.0663106	0.193339	0	0	4.94481	13.4173	IL1RN;IL1B
Musculoskeletal system disease	1/10	0.0701948	0.193465	0	0	15.3133	40.6794	HLA-B
Glycoproteinosis	1/10	0.0701948	0.193465	0	0	15.3133	40.6794	PSAP
Irregular astigmatism	1/10	0.0701948	0.193465	0	0	15.3133	40.6794	RPS18
Krabbe disease	1/10	0.0701948	0.193465	0	0	15.3133	40.6794	PSAP
Tetanus	2/60	0.0703508	0.193465	0	0	4.77381	12.6709	CALM2;EIF4G2
Multiple sclerosis	4/219	0.0753684	0.195075	0	0	2.59146	6.69987	RPL5;HLA-B;HLA-A;IER3
Rheumatoid arthritis	5/310	0.0754749	0.195075	0	0	2.28923	5.91526	RPS18;RPLP1;HLA-B;HLA-A;IER3
Vitiligo	2/63	0.0765571	0.195075	0	0	4.53835	11.6623	HLA-A;IER3
Esotropia	1/11	0.0769393	0.195075	0	0	13.7812	35.3453	RPL18
Campylobacteriosis	1/11	0.0769393	0.195075	0	0	13.7812	35.3453	RPS21
Clostridium difficile colitis	1/11	0.0769393	0.195075	0	0	13.7812	35.3453	RHOA
Dermatomyositis	1/11	0.0769393	0.195075	0	0	13.7812	35.3453	HSPG2
Cerebrovascular disease	4/225	0.0813715	0.195075	0	0	2.52033	6.32283	IL1B;CALM2;MMP9;RHOA
Duodenal ulcer	1/12	0.0836352	0.195075	0	0	12.5278	31.0851	IL1RN
Spinal stenosis	1/12	0.0836352	0.195075	0	0	12.5278	31.0851	FTH1
Spondylolisthesis	1/12	0.0836352	0.195075	0	0	12.5278	31.0851	FTH1
Neutral lipid storage disease	1/12	0.0836352	0.195075	0	0	12.5278	31.0851	PLIN2
Pneumocystosis	1/12	0.0836352	0.195075	0	0	12.5278	31.0851	ACTG1
Neurogenic bladder	1/13	0.0902828	0.195075	0	0	11.4832	27.6149	RPS24
Gingival recession	1/13	0.0902828	0.195075	0	0	11.4832	27.6149	IL1B
Gingivitis	1/13	0.0902828	0.195075	0	0	11.4832	27.6149	IL1B
Babesiosis	1/13	0.0902828	0.195075	0	0	11.4832	27.6149	RPS8
Basal cell carcinoma	1/13	0.0902828	0.195075	0	0	11.4832	27.6149	PHLDA1
Hepatic encephalopathy	1/13	0.0902828	0.195075	0	0	11.4832	27.6149	DBI
Parasitic helminthiasis infectious disease	1/13	0.0902828	0.195075	0	0	11.4832	27.6149	IL1B
Chorioamnionitis	1/13	0.0902828	0.195075	0	0	11.4832	27.6149	IL1B
Pseudoachondroplasia	1/13	0.0902828	0.195075	0	0	11.4832	27.6149	CALM2
Cryptosporidiosis	1/13	0.0902828	0.195075	0	0	11.4832	27.6149	DBI
Dry eye syndrome	1/13	0.0902828	0.195075	0	0	11.4832	27.6149	HSPG2
Bacterial vaginosis	1/14	0.0968825	0.202117	0	0	10.5994	24.7416	IL1B
Pericarditis	1/14	0.0968825	0.202117	0	0	10.5994	24.7416	IL1RN
Prostatitis	1/14	0.0968825	0.202117	0	0	10.5994	24.7416	IL1B
Cryoglobulinemia	1/14	0.0968825	0.202117	0	0	10.5994	24.7416	CD81
Lymphoid leukemia	3/152	0.0986275	0.203506	0	0	2.79412	6.47231	BTG1;RPLP1;B2M
Spindle cell hemangioma	1/15	0.103435	0.203506	0	0	9.84177	22.3291	ATP5G3
Mixed connective tissue disease	1/15	0.103435	0.203506	0	0	9.84177	22.3291	HSPG2
Gangliosidosis	1/15	0.103435	0.203506	0	0	9.84177	22.3291	PSAP
interleukin-7 receptor alpha deficiency	1/15	0.103435	0.203506	0	0	9.84177	22.3291	RPL5
Leptospirosis	1/15	0.103435	0.203506	0	0	9.84177	22.3291	RPLP2
Shigellosis	1/15	0.103435	0.203506	0	0	9.84177	22.3291	IL1B
Aceruloplasminemia	1/16	0.10994	0.209491	0	0	9.18519	20.2793	FTL
Pathological gambling	1/16	0.10994	0.209491	0	0	9.18519	20.2793	SRGN
Left ventricular noncompaction	1/16	0.10994	0.209491	0	0	9.18519	20.2793	RLF
Shwachman-Diamond syndrome	1/16	0.10994	0.209491	0	0	9.18519	20.2793	RPS14
Takayasu's arteritis	1/17	0.116398	0.215025	0	0	8.61068	18.5193	HLA-B
Generalized anxiety disorder	1/17	0.116398	0.215025	0	0	8.61068	18.5193	SRGN
Basal ganglia calcification	1/17	0.116398	0.215025	0	0	8.61068	18.5193	SLC20A1
Macroglobulinemia	1/17	0.116398	0.215025	0	0	8.61068	18.5193	B2M
Heart conduction disease	2/82	0.119327	0.218766	0	0	3.45717	7.34956	CDKN1A;ATP5G3
Thyrotoxicosis	1/18	0.122809	0.220147	0	0	8.10376	16.9946	HLA-A
Perinatal necrotizing enterocolitis	1/18	0.122809	0.220147	0	0	8.10376	16.9946	IL1B
Kallmann syndrome	1/18	0.122809	0.220147	0	0	8.10376	16.9946	DUSP6
Fatty liver disease	2/85	0.126534	0.221551	0	0	3.3317	6.88744	IL1B;PLIN2
Blepharophimosis	1/19	0.129175	0.221551	0	0	7.65316	15.6629	HSPG2
Pellagra	1/19	0.129175	0.221551	0	0	7.65316	15.6629	GAPDH
Carpal tunnel syndrome	1/19	0.129175	0.221551	0	0	7.65316	15.6629	B2M
Pertussis	1/19	0.129175	0.221551	0	0	7.65316	15.6629	CALM2
Chlamydia	1/19	0.129175	0.221551	0	0	7.65316	15.6629	IL1B
Endometritis	1/20	0.135494	0.221551	0	0	7.25	14.4915	IL1B
Aphasia	1/20	0.135494	0.221551	0	0	7.25	14.4915	GRN
Tularemia	1/20	0.135494	0.221551	0	0	7.25	14.4915	FTL
Portal hypertension	1/20	0.135494	0.221551	0	0	7.25	14.4915	MSN
Progeria	1/20	0.135494	0.221551	0	0	7.25	14.4915	ZMPSTE24
Root resorption	1/20	0.135494	0.221551	0	0	7.25	14.4915	IL1B
Diastrophic dysplasia	1/20	0.135494	0.221551	0	0	7.25	14.4915	RPS14
Kidney disease	2/91	0.141244	0.228719	0	0	3.10615	6.07957	CALM2;RPS12
Brain edema	1/21	0.141768	0.228719	0	0	6.88715	13.4545	MMP9
Agammaglobulinemia	1/22	0.147997	0.234086	0	0	6.55886	12.5311	CD81
Gaucher's disease	1/22	0.147997	0.234086	0	0	6.55886	12.5311	PSAP
Congenital nystagmus	1/22	0.147997	0.234086	0	0	6.55886	12.5311	MSN
Ameloblastoma	1/23	0.154181	0.23615	0	0	6.26042	11.7047	MMP9
Ankylosis	1/23	0.154181	0.23615	0	0	6.26042	11.7047	SPP1
Choreatic disease	1/23	0.154181	0.23615	0	0	6.26042	11.7047	FTL
Polycythemia vera	1/23	0.154181	0.23615	0	0	6.26042	11.7047	CALR
Diphtheria	1/23	0.154181	0.23615	0	0	6.26042	11.7047	EEF2
Ankylosing spondylitis	1/24	0.16032	0.240978	0	0	5.98792	10.9614	HLA-B
Treacher Collins syndrome	1/24	0.16032	0.240978	0	0	5.98792	10.9614	RPS14
Mastocytosis	1/24	0.16032	0.240978	0	0	5.98792	10.9614	CD63
Essential tremor	1/25	0.166415	0.241152	0	0	5.73814	10.29	CHCHD2
Apraxia	1/25	0.166415	0.241152	0	0	5.73814	10.29	GRN
Wiskott-Aldrich syndrome	1/25	0.166415	0.241152	0	0	5.73814	10.29	CFL1
Collagen disease	1/25	0.166415	0.241152	0	0	5.73814	10.29	IL1B
Leukodystrophy	1/25	0.166415	0.241152	0	0	5.73814	10.29	PSAP
Lyme disease	1/25	0.166415	0.241152	0	0	5.73814	10.29	YBX1
Klinefelter's syndrome	1/26	0.172466	0.248433	0	0	5.50833	9.6812	DUSP6
Synovitis	1/27	0.178473	0.251108	0	0	5.29621	9.12704	IL1B
Amyloidosis	1/27	0.178473	0.251108	0	0	5.29621	9.12704	B2M
Autosomal dominant cerebellar ataxia	1/27	0.178473	0.251108	0	0	5.29621	9.12704	EEF2
Hyperhomocysteinemia	1/27	0.178473	0.251108	0	0	5.29621	9.12704	MMP9
Dystonia	1/28	0.184437	0.252169	0	0	5.09979	8.62092	ACTB
Turner syndrome	1/28	0.184437	0.252169	0	0	5.09979	8.62092	RPS4X
Congenital adrenal hyperplasia	1/28	0.184437	0.252169	0	0	5.09979	8.62092	HLA-B
Lipodystrophy	1/28	0.184437	0.252169	0	0	5.09979	8.62092	ZMPSTE24
Malignant hyperthermia	1/28	0.184437	0.252169	0	0	5.09979	8.62092	CALM2
Toxic shock syndrome	1/29	0.190359	0.258802	0	0	4.91741	8.15723	IL1B
Ataxia telangiectasia	1/30	0.196237	0.26383	0	0	4.74761	7.73116	CDKN1A
Uterine fibroid	1/30	0.196237	0.26383	0	0	4.74761	7.73116	S100A6
Bronchitis	1/31	0.202073	0.268425	0	0	4.58912	7.33858	IL1B
Calcinosis	1/31	0.202073	0.268425	0	0	4.58912	7.33858	SPP1
Ulcerative colitis	2/115	0.202982	0.268425	0	0	2.44347	3.89644	ARPC2;HLA-A
Chagas disease	1/32	0.207867	0.27339	0	0	4.44086	6.97596	CALR
Otitis media	1/33	0.213619	0.279437	0	0	4.30187	6.64019	IL1B
Psoriasis	1/35	0.224999	0.292741	0	0	4.04841	6.03884	HLA-B
Bipolar disorder	2/124	0.22689	0.293622	0	0	2.26218	3.35547	HLA-B;HLA-A
Acute cystitis	1/37	0.236216	0.302456	0	0	3.82311	5.51678	B2M
Idiopathic scoliosis	1/37	0.236216	0.302456	0	0	3.82311	5.51678	CALM2
Neurofibromatosis	1/38	0.241764	0.304723	0	0	3.71959	5.28106	MSN
Hyperparathyroidism	1/38	0.241764	0.304723	0	0	3.71959	5.28106	B2M
Schistosomiasis	1/38	0.241764	0.304723	0	0	3.71959	5.28106	GAPDH
Amnestic disorder	1/39	0.247271	0.30687	0	0	3.62153	5.06025	EIF4G2
Night blindness	1/39	0.247271	0.30687	0	0	3.62153	5.06025	PLIN2
Rickets	1/39	0.247271	0.30687	0	0	3.62153	5.06025	SPP1
Macular degeneration	1/40	0.252739	0.312055	0	0	3.52849	4.85308	IER3
Immune system cancer	2/137	0.261727	0.321513	0	0	2.04299	2.73854	BTG1;B2M
Gastritis	1/43	0.268907	0.328665	0	0	3.27596	4.30261	IL1RN
Thalassemia	1/45	0.279493	0.338186	0	0	3.12674	3.9859	GDF15
Keratoconus	1/45	0.279493	0.338186	0	0	3.12674	3.9859	TIMP1
Hepatitis	1/46	0.284728	0.34111	0	0	3.0571	3.84039	TIMP1
Mastitis	1/46	0.284728	0.34111	0	0	3.0571	3.84039	IL1B
Peripheral vascular disease	1/47	0.289926	0.345626	0	0	2.99049	3.70261	NRG4
Irritable bowel syndrome	1/50	0.305295	0.362163	0	0	2.80697	3.33041	IL1B
Metabolic acidosis	1/51	0.310344	0.366357	0	0	2.75069	3.21852	RPS21
Type 1 diabetes mellitus	2/158	0.317982	0.373552	0	0	1.76609	2.02352	HLA-B;IER3
Alopecia areata	1/56	0.335049	0.391699	0	0	2.5	2.7337	IER3
Pneumonia	1/64	0.372761	0.433693	0	0	2.18166	2.1529	MMP9
Eosinophilia	1/66	0.381852	0.442144	0	0	2.11432	2.0355	HSPG2
Cholestasis	1/67	0.386348	0.44522	0	0	2.08218	1.98018	IL1B
Globe disease	1/68	0.390812	0.44823	0	0	2.051	1.92697	TPT1
Human immunodeficiency virus infectious disease	1/69	0.395244	0.451175	0	0	2.02073	1.87575	HLA-B
Cataract	1/74	0.416926	0.473691	0	0	1.88185	1.64633	FTL
Brain disease	1/77	0.429564	0.483509	0	0	1.80729	1.52714	IL1B
Lupus erythematosus	1/77	0.429564	0.483509	0	0	1.80729	1.52714	CALR
Acquired immunodeficiency syndrome	1/78	0.433715	0.485922	0	0	1.78373	1.49007	HLA-B
Major depressive disorder	1/79	0.437837	0.488279	0	0	1.76077	1.45424	IL1B
Blindness	1/81	0.445991	0.495091	0	0	1.71658	1.38606	PPT1
Pancreatitis	1/84	0.458002	0.506103	0	0	1.65428	1.2918	IL1B
Nonsyndromic deafness	1/87	0.469755	0.516731	0	0	1.59633	1.2061	ACTG1
DOID:2627	1/92	0.488783	0.535229	0	0	1.50824	1.07965	HSPG2
Thrombocytopenia	1/95	0.499873	0.544907	0	0	1.45988	1.01229	B2M
Influenza	1/99	0.514288	0.558107	0	0	1.40001	0.930969	IL1B
Pain agnosia	1/101	0.521341	0.563234	0	0	1.37187	0.893573	IL1B
Hyperglycemia	1/108	0.545232	0.586427	0	0	1.28167	0.77739	IL1B
Type 2 diabetes mellitus	2/269	0.583097	0.624378	0	0	1.02606	0.553459	BTG1;IL1B
Large intestine cancer	1/122	0.589519	0.628474	0	0	1.13258	0.598507	HSPG2
Osteoporosis	1/130	0.612874	0.650507	0	0	1.06191	0.519905	RPS12
Intellectual disability	2/296	0.635255	0.671317	0	0	0.930546	0.422216	ACTB;ACTG1
Cancer	2/300	0.642536	0.67606	0	0	0.917867	0.406002	BTG1;RHOA
Diarrhea	1/151	0.66809	0.699904	0	0	0.912269	0.367947	IL1B
Infertility	1/163	0.696052	0.726054	0	0	0.844179	0.305872	IL1B
Acquired metabolic disease	2/338	0.70611	0.733385	0	0	0.812479	0.28273	RPS14;HMGA1
Alzheimer's disease	1/195	0.759695	0.785668	0	0	0.703787	0.193427	S100A6
Cardiovascular system disease	1/246	0.83488	0.858583	0	0	0.555839	0.100311	RPLP1
Crohn's disease	1/248	0.837295	0.858583	0	0	0.551282	0.0978957	RHOA
Endometrial cancer	1/292	0.882388	0.901004	0	0	0.466877	0.0584171	CSDE1
Lung cancer	1/400	0.947138	0.963056	0	0	0.338624	0.0183909	LCP1
Breast cancer	1/434	0.95894	0.970977	0	0	0.31149	0.0130596	HSPG2
Liver cancer	1/597	0.987846	0.996078	0	0	0.224401	0.00274402	HSPG2
Kidney cancer	8/2584	0.998988	0.999995	0	0	0.39169	0.000396442	ACTN1;PABPC4;CSDE1;B2M;HSPG2;RLF;MMP9;EIF4G2
Carcinoma	42/11318	0.999995	0.999995	0	0	0.310237	1.58995e-06	RPL5;CDKN1A;GRN;HSP90AB1;SLC20A1;SDC2;ITGB2;HNRNPU;YBX1;RLF;ACTB;ACTG1;MTDH;ZMPSTE24;TUBA1B;UBC;PSAP;PHLDA1;B2M;HSP90AA1;ACTN1;APLP2;PABPC4;PLAUR;MSN;ACTN4;HLA-A;EEF2;HSPG2;MMP9;RHOA;DUSP6;MMP14;CSDE1;IL1B;CANX;CHI3L1;PLIN2;LCP1;SMAP2;RPS24;EIF4G2

## Sheet: Allen Brain Atlas up
Term	Overlap	P-value	Adjusted P-value	Old P-value	Old Adjusted P-value	Odds Ratio	Combined Score	Genes
lower dorsal lateral hypothalamic area	9/301	0.000356949	0.64465	0	0	4.4336	35.1935	CD63;CD81;RPS8;RPL37A;RPL35A;RPS27A;PFDN5;RPS24;RPS12
Posterior hypothalamic nucleus	8/301	0.00161226	0.727934	0	0	3.89866	25.0688	H2AFY;CD81;RPS8;SDC2;RPL37A;TIMP1;PFDN5;RPS24
posterior part of anterior hypothalamic nucleus	8/301	0.00161226	0.727934	0	0	3.89866	25.0688	HSP90AA1;RPL31;RPS8;SDC2;TIMP1;RPS11;PFDN5;RPS12
shell of P-DMH	8/301	0.00161226	0.727934	0	0	3.89866	25.0688	RPS19;RPS8;SDC2;RPL37A;TIMP1;RPS27A;PFDN5;RPS12
Bed nuclei of the stria terminalis, anterior division, magnocellular nucleus	7/301	0.00645432	0.728532	0	0	3.37491	17.0197	RPS19;SDC2;RPS27A;RPS21;PFDN5;RPS24;RPS12
Dopaminergic A13 group	7/301	0.00645432	0.728532	0	0	3.37491	17.0197	RPL31;RPS8;CANX;RPS11;RPS27A;PFDN5;RPS12
Dorsomedial nucleus of the hypothalamus, anterior part	7/301	0.00645432	0.728532	0	0	3.37491	17.0197	RPL31;RPS8;SDC2;TIMP1;RPS11;PFDN5;RPS12
Medial preoptic nucleus, medial part	7/301	0.00645432	0.728532	0	0	3.37491	17.0197	RPS16;FCER1G;SDC2;RGS16;CANX;RPS11;RPS12
Paraventricular hypothalamic nucleus, descending division	7/301	0.00645432	0.728532	0	0	3.37491	17.0197	RPL30;CANX;RPS11;RPS27A;RPS21;PFDN5;RPS12
Paraventricular hypothalamic nucleus, descending division, lateral parvicellular part	7/301	0.00645432	0.728532	0	0	3.37491	17.0197	RPL30;CANX;RPS11;RPS27A;RPS21;PFDN5;RPS12
central part of MPO	7/301	0.00645432	0.728532	0	0	3.37491	17.0197	FCER1G;RPS19;NRG4;SDC2;RGS16;CANX;RPS12
intermediate stratum of THyB-I	7/301	0.00645432	0.728532	0	0	3.37491	17.0197	CD63;FCER1G;RPS19;SDC2;RPL37A;S100A6;RPS12
paraventricular nucleus, cap part	7/301	0.00645432	0.728532	0	0	3.37491	17.0197	RPL30;CD81;RPS8;CANX;LAPTM5;RPS11;RPS12
peduncular part of dorsomedial hypothalamic nucleus	7/301	0.00645432	0.728532	0	0	3.37491	17.0197	RPS19;RPS8;SDC2;RPL37A;TIMP1;PFDN5;RPS12
periventricular stratum of PO2	7/301	0.00645432	0.728532	0	0	3.37491	17.0197	RPL5;RPS19;SDC2;RGS16;CANX;RPS21;RPS12
superficial part of arcuate nucleus	7/301	0.00645432	0.728532	0	0	3.37491	17.0197	CD63;FCER1G;SDC2;CANX;RPL37A;S100A6;RPL37
Medial preoptic nucleus	8/410	0.0101827	0.770903	0	0	2.82573	12.9618	FCER1G;RPS19;SDC2;RGS16;CANX;RPS11;RPS21;RPS12
Bed nuclei of the stria terminalis, anterior division, dorsomedial nucleus	6/301	0.0226234	0.770903	0	0	2.86209	10.8438	SDC2;IL1B;RPS27A;RPS21;PFDN5;RPS12
Dorsomedial nucleus of the hypothalamus, ventral part	6/301	0.0226234	0.770903	0	0	2.86209	10.8438	CD63;FCER1G;SDC2;RPL37A;RPS27A;RPS12
Gustatory areas, layer 6a	6/301	0.0226234	0.770903	0	0	2.86209	10.8438	LASP1;TYROBP;PPT1;PLAUR;ACTN4;IER3
Interpeduncular nucleus	6/301	0.0226234	0.770903	0	0	2.86209	10.8438	IL1RN;GRN;FCER1G;SDC2;S100A6;TIMP1
Lingula (I), molecular layer	6/301	0.0226234	0.770903	0	0	2.86209	10.8438	CD63;GDF15;ITGB2;DBI;CTSD;TPT1
Orbital area, ventrolateral part, layer 5	6/301	0.0226234	0.770903	0	0	2.86209	10.8438	IL1RN;CDKN1A;TMED9;TYROBP;RPS18;S100A6
Paraventricular hypothalamic nucleus	6/301	0.0226234	0.770903	0	0	2.86209	10.8438	RPS8;SDC2;CANX;RPS3;LAPTM5;RPS12
Paraventricular hypothalamic nucleus, magnocellular division	6/301	0.0226234	0.770903	0	0	2.86209	10.8438	RPL30;RPS19;RPL23;CANX;RPS11;RPS12
Paraventricular hypothalamic nucleus, magnocellular division, medial magnocellular part	6/301	0.0226234	0.770903	0	0	2.86209	10.8438	RPL30;RPS19;RPL23;CANX;RPL37A;RPS12
Paraventricular hypothalamic nucleus, magnocellular division, posterior magnocellular part	6/301	0.0226234	0.770903	0	0	2.86209	10.8438	RPS19;RPL23;CANX;LAPTM5;RPS11;RPS12
Paraventricular hypothalamic nucleus, magnocellular division, posterior magnocellular part, lateral zone	6/301	0.0226234	0.770903	0	0	2.86209	10.8438	RPS19;RPL23;CANX;LAPTM5;RPS11;RPS12
Paraventricular hypothalamic nucleus, parvicellular division	6/301	0.0226234	0.770903	0	0	2.86209	10.8438	RPS8;SDC2;CANX;RPS3;LAPTM5;RPS12
Periventricular hypothalamic nucleus, posterior part	6/301	0.0226234	0.770903	0	0	2.86209	10.8438	CD63;FCER1G;SDC2;S100A6;MSN;RPS12
central part of VMH	6/301	0.0226234	0.770903	0	0	2.86209	10.8438	RPL5;FCER1G;RPS19;SDC2;RPL35A;RPS12
dorsal tuberomammillary nucleus, intermediate part (histaminergic)	6/301	0.0226234	0.770903	0	0	2.86209	10.8438	H2AFY;RPS8;SDC2;TIMP1;RPS11;RPS12
dorsomedial nucleus, terminal part	6/301	0.0226234	0.770903	0	0	2.86209	10.8438	CD63;FCER1G;RPS19;SDC2;RPL37A;TAGLN2
intermediate part of the arcuate nucleus	6/301	0.0226234	0.770903	0	0	2.86209	10.8438	CD63;FCER1G;SDC2;RPL37A;S100A6;RPS12
intermediate periretromammillary nucleus	6/301	0.0226234	0.770903	0	0	2.86209	10.8438	FCER1G;CD81;SDC2;RPL37A;RPL37;PFDN5
intermediate stratum of PHyB-I	6/301	0.0226234	0.770903	0	0	2.86209	10.8438	CD81;SDC2;RPL37A;TIMP1;PFDN5;RPS12
intermediate stratum of PHyB-P	6/301	0.0226234	0.770903	0	0	2.86209	10.8438	FCER1G;CD81;SDC2;RPL37A;RPL37;PFDN5
intermediate stratum of PHyB-V	6/301	0.0226234	0.770903	0	0	2.86209	10.8438	H2AFY;RPS8;SDC2;TIMP1;RPS11;RPS12
intermediate stratum of PSPa	6/301	0.0226234	0.770903	0	0	2.86209	10.8438	CD81;SDC2;RPL35A;RPS27A;PFDN5;RPS12
intermediate stratum of THyB-V	6/301	0.0226234	0.770903	0	0	2.86209	10.8438	CD63;GRN;S100A6;MSN;RPL37;TIMP1
intermediate stratum of ZIC	6/301	0.0226234	0.770903	0	0	2.86209	10.8438	H2AFY;CD81;RPS8;SDC2;RPL11;RPS21
layer 4 of OCx	6/301	0.0226234	0.770903	0	0	2.86209	10.8438	CDKN1A;LASP1;CCL20;GAPDH;DUSP6;TPT1
layer 5 of OCx	6/301	0.0226234	0.770903	0	0	2.86209	10.8438	CDKN1A;LASP1;TMED9;YWHAB;DUSP6;TPT1
layer 6 of InsCx	6/301	0.0226234	0.770903	0	0	2.86209	10.8438	LASP1;TYROBP;PPT1;PLAUR;ACTN4;IER3
mantle zone of ZIC	6/301	0.0226234	0.770903	0	0	2.86209	10.8438	H2AFY;CD81;RPS8;SDC2;RPL11;RPS21
medial part of MPO	6/301	0.0226234	0.770903	0	0	2.86209	10.8438	RPS19;RPL23;SDC2;RGS16;CANX;RPS12
paraventricular nucleus, rostral part	6/301	0.0226234	0.770903	0	0	2.86209	10.8438	RPL31;SDC2;CANX;LAPTM5;RPS11;RPS12
r1 roof plate	6/301	0.0226234	0.770903	0	0	2.86209	10.8438	CD63;ITGB2;DBI;HSPG2;CTSD;TPT1
roof plate of p2 (epithalamic roofplate)	6/301	0.0226234	0.770903	0	0	2.86209	10.8438	CD63;IL1RN;MMP14;IL1B;ITGB2;DBI
rostral zona incerta	6/301	0.0226234	0.770903	0	0	2.86209	10.8438	H2AFY;CD81;RPS8;SDC2;RPL11;RPS21
shell of T-DMH	6/301	0.0226234	0.770903	0	0	2.86209	10.8438	CD63;FCER1G;RPS19;SDC2;RPL37A;TAGLN2
ventral tuberomammillary nucleus, intermediate part (histaminergic)	6/301	0.0226234	0.770903	0	0	2.86209	10.8438	CD63;GRN;S100A6;MSN;RPL37;TIMP1
zona incerta complex	6/301	0.0226234	0.770903	0	0	2.86209	10.8438	H2AFY;CD81;RPS8;SDC2;RPL11;RPS21
Dorsal premammillary nucleus	8/482	0.0244369	0.81728	0	0	2.38763	8.86207	FCER1G;CD81;SDC2;CANX;RPL37A;S100A6;RPL37;PFDN5
AOB, granular layer	5/301	0.0684151	0.896405	0	0	2.35992	6.32968	IL1RN;CDKN1A;RAB31;BTG1;IL1B
Anteroventral nucleus of thalamus	5/301	0.0684151	0.896405	0	0	2.35992	6.32968	CD63;MMP14;ITGB2;DBI;HSPG2
Anteroventral periventricular nucleus	5/301	0.0684151	0.896405	0	0	2.35992	6.32968	RPL5;FCER1G;RGS16;RPS11;RPS12
Dorsal peduncular area	5/301	0.0684151	0.896405	0	0	2.35992	6.32968	FCER1G;GDF15;S100A4;HLA-A;HSPG2
Dorsal peduncular area, layer 1	5/301	0.0684151	0.896405	0	0	2.35992	6.32968	FCER1G;GDF15;S100A4;HLA-A;HSPG2
Dorsomedial nucleus of the hypothalamus	5/301	0.0684151	0.896405	0	0	2.35992	6.32968	RPS19;SDC2;TIMP1;PFDN5;RPS12
Dorsomedial nucleus of the hypothalamus, posterior part	5/301	0.0684151	0.896405	0	0	2.35992	6.32968	RPS19;SDC2;TIMP1;PFDN5;RPS12
Fastigial nucleus	5/301	0.0684151	0.896405	0	0	2.35992	6.32968	CD63;BTG1;ITGB2;S100A4;HSPG2
Gustatory areas, layer 5	5/301	0.0684151	0.896405	0	0	2.35992	6.32968	LASP1;TYROBP;PPT1;PLAUR;ACTN4
Infralimbic area	5/301	0.0684151	0.896405	0	0	2.35992	6.32968	FCER1G;S100A6;S100A4;HLA-A;HSPG2
Nucleus of the solitary tract, commissural part	5/301	0.0684151	0.896405	0	0	2.35992	6.32968	PPT1;MSN;TAGLN2;PLIN2;LCP1
Orbital area, lateral part, layer 5	5/301	0.0684151	0.896405	0	0	2.35992	6.32968	IL1RN;LASP1;TMED9;RPS18;IER3
Orbital area, lateral part, layer 6a	5/301	0.0684151	0.896405	0	0	2.35992	6.32968	IL1RN;TMED9;TYROBP;RPS18;MTDH
Orbital area, medial part, layer 6a	5/301	0.0684151	0.896405	0	0	2.35992	6.32968	CDKN1A;TMED9;S100A6;PPT1;SH3BGRL3
Orbital area, ventrolateral part	5/301	0.0684151	0.896405	0	0	2.35992	6.32968	IL1RN;CDKN1A;IL1B;S100A6;LAPTM5
Orbital area, ventrolateral part, layer 2/3	5/301	0.0684151	0.896405	0	0	2.35992	6.32968	IL1RN;CDKN1A;IL1B;S100A6;LAPTM5
Paraventricular hypothalamic nucleus, parvicellular division, medial parvicellular part, dorsal zone	5/301	0.0684151	0.896405	0	0	2.35992	6.32968	CANX;RPS3;LAPTM5;RPS11;RPS12
Periventricular region	5/301	0.0684151	0.896405	0	0	2.35992	6.32968	CD63;SDC2;TIMP1;RPS21;RPS12
Posterodorsal preoptic nucleus	5/301	0.0684151	0.896405	0	0	2.35992	6.32968	RPS19;SDC2;RPS27A;PFDN5;RPS12
Primary somatosensory area, nose	5/301	0.0684151	0.896405	0	0	2.35992	6.32968	LASP1;TYROBP;PPT1;PLAUR;ACTN4
Primary somatosensory area, nose, layer 6a	5/301	0.0684151	0.896405	0	0	2.35992	6.32968	LASP1;TYROBP;PPT1;PLAUR;ACTN4
Primary visual area, layer 5	5/301	0.0684151	0.896405	0	0	2.35992	6.32968	CDKN1A;LASP1;CCL20;DUSP6;TPT1
Primary visual area, layer 6b	5/301	0.0684151	0.896405	0	0	2.35992	6.32968	CAP1;MYL6;CDKN1A;YWHAB;PPT1
Retrosplenial area, lateral agranular part, layer 6a	5/301	0.0684151	0.896405	0	0	2.35992	6.32968	CDKN1A;TMED9;S100A4;RPS27A;DUSP6
Subparafascicular nucleus, magnocellular part	5/301	0.0684151	0.896405	0	0	2.35992	6.32968	RPS8;SDC2;RGS16;HSPG2;PFDN5
Ventral premammillary nucleus	5/301	0.0684151	0.896405	0	0	2.35992	6.32968	FCER1G;SDC2;CANX;RPL37A;TAGLN2
Ventromedial hypothalamic nucleus, central part	5/301	0.0684151	0.896405	0	0	2.35992	6.32968	RPL5;FCER1G;SDC2;RPL35A;RPS12
Zona incerta	5/301	0.0684151	0.896405	0	0	2.35992	6.32968	RAB31;RPS8;RPL35A;RPL27;RPS21
alar part of peduncular hypothalamus	5/301	0.0684151	0.896405	0	0	2.35992	6.32968	CD81;RPL11;RPS3;RPS21;RPS12
anteroventral nucleus	5/301	0.0684151	0.896405	0	0	2.35992	6.32968	CD63;RGS16;ITGB2;DBI;HSPG2
cerebellar nuclei of CbV	5/301	0.0684151	0.896405	0	0	2.35992	6.32968	CD63;BTG1;ITGB2;S100A4;HSPG2
core of T-DMH	5/301	0.0684151	0.896405	0	0	2.35992	6.32968	CD63;GRN;SDC2;MSN;RPS12
dorsal part of PHyB	5/301	0.0684151	0.896405	0	0	2.35992	6.32968	SDC2;RPL35A;RPS21;PFDN5;RPS12
dorsomedial preoptic area, intermediate part	5/301	0.0684151	0.896405	0	0	2.35992	6.32968	NRG4;SDC2;RPS27A;RPS21;RPS12
granule cell layer of the DG	5/301	0.0684151	0.896405	0	0	2.35992	6.32968	TMED9;FAU;PFN1;RLF;RPS12
hilus of the DG	5/301	0.0684151	0.896405	0	0	2.35992	6.32968	TMED9;RPL31;FAU;PFN1;RLF
insular cortex	5/301	0.0684151	0.896405	0	0	2.35992	6.32968	TYROBP;PLAUR;LAPTM5;ACTN4;IER3
intermediate stratum of p3B	5/301	0.0684151	0.896405	0	0	2.35992	6.32968	RPS8;SDC2;IL1B;RPL35A;RPS21
layer 5 of InsCx	5/301	0.0684151	0.896405	0	0	2.35992	6.32968	LASP1;TYROBP;PPT1;ACTN4;IER3
layer 6 of OCx	5/301	0.0684151	0.896405	0	0	2.35992	6.32968	CAP1;MYL6;CDKN1A;YWHAB;DUSP6
mantle zone of InsCx	5/301	0.0684151	0.896405	0	0	2.35992	6.32968	TYROBP;PLAUR;LAPTM5;ACTN4;IER3
mantle zone of PHyB-D	5/301	0.0684151	0.896405	0	0	2.35992	6.32968	SDC2;RPL35A;RPS21;PFDN5;RPS12
mantle zone of PO2	5/301	0.0684151	0.896405	0	0	2.35992	6.32968	RPS19;SDC2;RGS16;RPS21;RPS12
mantle zone of PSPa	5/301	0.0684151	0.896405	0	0	2.35992	6.32968	CD81;SDC2;RPL35A;RPS21;PFDN5
mantle zone of THyB-V	5/301	0.0684151	0.896405	0	0	2.35992	6.32968	GRN;FCER1G;S100A6;RPL37;TIMP1
medial (fastigial) cerebellar nucleus	5/301	0.0684151	0.896405	0	0	2.35992	6.32968	CD63;BTG1;ITGB2;S100A4;HSPG2
p3 portion of paranigral nucleus	5/301	0.0684151	0.896405	0	0	2.35992	6.32968	IL1RN;SDC2;S100A6;S100A4;TIMP1
peduncular subparaventricular area	5/301	0.0684151	0.896405	0	0	2.35992	6.32968	CD81;SDC2;RPL35A;RPS21;PFDN5
periventricular stratum of AOB	5/301	0.0684151	0.896405	0	0	2.35992	6.32968	IL1RN;CDKN1A;RAB31;BTG1;IL1B
preoptic alar plate	5/301	0.0684151	0.896405	0	0	2.35992	6.32968	NRG4;SDC2;RGS16;RPS21;RPS12
preoptic area	5/301	0.0684151	0.896405	0	0	2.35992	6.32968	NRG4;SDC2;RGS16;RPS21;RPS12
preoptic telencephalon	5/301	0.0684151	0.896405	0	0	2.35992	6.32968	NRG4;SDC2;RGS16;RPS21;RPS12
r10 part of nucleus gracilis	5/301	0.0684151	0.896405	0	0	2.35992	6.32968	S100A6;PPT1;MSN;TAGLN2;PLIN2
r3 part of medial pontine nuclei	5/301	0.0684151	0.896405	0	0	2.35992	6.32968	GRN;SLC20A1;HMGA1;SPP1;PHLDA1
second (ventral) preoptic domain	5/301	0.0684151	0.896405	0	0	2.35992	6.32968	RPS19;SDC2;RGS16;RPS21;RPS12
sublayer 6b of OCx	5/301	0.0684151	0.896405	0	0	2.35992	6.32968	CAP1;MYL6;CDKN1A;PPT1;DUSP6
superficial stratum of InsCx (cortical plate/marginal zone)	5/301	0.0684151	0.896405	0	0	2.35992	6.32968	TYROBP;PLAUR;LAPTM5;ACTN4;IER3
superficial stratum of r3BM	5/301	0.0684151	0.896405	0	0	2.35992	6.32968	GRN;SLC20A1;HMGA1;SPP1;PHLDA1
superior periolivary nucleus	5/301	0.0684151	0.896405	0	0	2.35992	6.32968	IL1RN;NRG4;SPP1;HLA-A;LCP1
upper basal lateral hypothalamic area	5/301	0.0684151	0.896405	0	0	2.35992	6.32968	CD81;RPL37A;RPL35A;PHLDA1;PFDN5
upper basal perifornical nucleus	5/301	0.0684151	0.896405	0	0	2.35992	6.32968	SDC2;RPL35A;RPS27A;PFDN5;RPS12
ventral part of THyB	5/301	0.0684151	0.896405	0	0	2.35992	6.32968	GRN;FCER1G;S100A6;RPL37;TIMP1
intermediate stratum of DG	7/597	0.143772	0.896405	0	0	1.65629	3.21241	TMED9;RAB31;RPL31;CCL20;FAU;PFN1;RLF
Ventromedial hypothalamic nucleus	5/405	0.171686	0.896405	0	0	1.73705	3.06084	RPL5;CD63;FCER1G;SDC2;RPS12
Accessory olfactory bulb, granular layer	4/301	0.175352	0.896405	0	0	1.86814	3.25235	IL1RN;RAB31;BTG1;IL1B
Agranular insular area, ventral part	4/301	0.175352	0.896405	0	0	1.86814	3.25235	GRN;TYROBP;PLAUR;ACTN4
Anteromedial visual area, layer 5	4/301	0.175352	0.896405	0	0	1.86814	3.25235	CDKN1A;TMED9;GAPDH;DUSP6
Anteromedial visual area, layer 6b	4/301	0.175352	0.896405	0	0	1.86814	3.25235	CAP1;CDKN1A;YWHAB;PHLDA1
Arcuate hypothalamic nucleus	4/301	0.175352	0.896405	0	0	1.86814	3.25235	CD63;SDC2;S100A6;RPS12
Auditory areas	4/301	0.175352	0.896405	0	0	1.86814	3.25235	YWHAB;FTH1;PPT1;IER3
Bed nuclei of the stria terminalis, posterior division, transverse nucleus	4/301	0.175352	0.896405	0	0	1.86814	3.25235	PLAUR;RPL35A;RPS21;PFDN5
Dorsal motor nucleus of the vagus nerve	4/301	0.175352	0.896405	0	0	1.86814	3.25235	PPT1;MSN;TAGLN2;PLIN2
Gustatory areas, layer 6b	4/301	0.175352	0.896405	0	0	1.86814	3.25235	TYROBP;YWHAB;ACTN4;IER3
Infralimbic area, layer 1	4/301	0.175352	0.896405	0	0	1.86814	3.25235	FCER1G;S100A4;HLA-A;HSPG2
Infralimbic area, layer 6a	4/301	0.175352	0.896405	0	0	1.86814	3.25235	RPL5;CDKN1A;S100A6;DUSP6
Lateral visual area	4/301	0.175352	0.896405	0	0	1.86814	3.25235	CDKN1A;PLAUR;PLIN2;RPS27A
Lingula (I)	4/301	0.175352	0.896405	0	0	1.86814	3.25235	CD63;ITGB2;DBI;CTSD
Main olfactory bulb	4/301	0.175352	0.896405	0	0	1.86814	3.25235	IL1RN;CDKN1A;IL1B;PLIN2
Main olfactory bulb, glomerular layer	4/301	0.175352	0.896405	0	0	1.86814	3.25235	IL1RN;FCER1G;IL1B;PLIN2
Main olfactory bulb, outer plexiform layer	4/301	0.175352	0.896405	0	0	1.86814	3.25235	IL1RN;CDKN1A;IL1B;PLIN2
Medial preoptic area	4/301	0.175352	0.896405	0	0	1.86814	3.25235	SDC2;CANX;RPS21;RPS12
Medial preoptic nucleus, lateral part	4/301	0.175352	0.896405	0	0	1.86814	3.25235	FCER1G;SDC2;RGS16;CANX
Nucleus of the posterior commissure	4/301	0.175352	0.896405	0	0	1.86814	3.25235	RGS16;S100A4;PFDN5;IER3
OB glomerular layer	4/301	0.175352	0.896405	0	0	1.86814	3.25235	IL1RN;FCER1G;IL1B;PLIN2
OB granular layer	4/301	0.175352	0.896405	0	0	1.86814	3.25235	IL1RN;CDKN1A;BTG1;IL1B
OB outer plexiform layer	4/301	0.175352	0.896405	0	0	1.86814	3.25235	IL1RN;CDKN1A;IL1B;PLIN2
Olfactory areas	4/301	0.175352	0.896405	0	0	1.86814	3.25235	IL1RN;CDKN1A;IL1B;PLIN2
Orbital area, lateral part	4/301	0.175352	0.896405	0	0	1.86814	3.25235	IL1RN;TMED9;IL1B;LAPTM5
Orbital area, lateral part, layer 1	4/301	0.175352	0.896405	0	0	1.86814	3.25235	IL1RN;GDF15;IL1B;LAPTM5
Orbital area, lateral part, layer 2/3	4/301	0.175352	0.896405	0	0	1.86814	3.25235	IL1RN;TMED9;IL1B;LAPTM5
Orbital area, medial part	4/301	0.175352	0.896405	0	0	1.86814	3.25235	IL1RN;FCER1G;S100A6;HSPG2
Orbital area, medial part, layer 2	4/301	0.175352	0.896405	0	0	1.86814	3.25235	IL1RN;FCER1G;GDF15;S100A6
Orbital area, medial part, layer 2/3	4/301	0.175352	0.896405	0	0	1.86814	3.25235	IL1RN;FCER1G;GDF15;S100A6
Orbital area, medial part, layer 5	4/301	0.175352	0.896405	0	0	1.86814	3.25235	IL1RN;CDKN1A;S100A6;SH3BGRL3
Parastrial nucleus	4/301	0.175352	0.896405	0	0	1.86814	3.25235	NRG4;RPS27A;RPS21;RPS12
Paraventricular hypothalamic nucleus, parvicellular division, anterior parvicellular part	4/301	0.175352	0.896405	0	0	1.86814	3.25235	RPL30;SDC2;RPS3;RPS12
Periaqueductal gray	4/301	0.175352	0.896405	0	0	1.86814	3.25235	RPS8;RPL37A;PFDN5;RPS24
Posterior parietal association areas, layer 2/3	4/301	0.175352	0.896405	0	0	1.86814	3.25235	CDKN1A;HSPG2;RLF;DUSP6
Posterior parietal association areas, layer 6a	4/301	0.175352	0.896405	0	0	1.86814	3.25235	CAP1;CDKN1A;PHLDA1;DUSP6
Posterolateral visual area, layer 5	4/301	0.175352	0.896405	0	0	1.86814	3.25235	CDKN1A;LASP1;PLAUR;DUSP6
Prelimbic area	4/301	0.175352	0.896405	0	0	1.86814	3.25235	IL1RN;TMED9;S100A6;SH3BGRL3
Primary somatosensory area, mouth, layer 4	4/301	0.175352	0.896405	0	0	1.86814	3.25235	LASP1;TYROBP;PLAUR;B2M
Primary somatosensory area, mouth, layer 5	4/301	0.175352	0.896405	0	0	1.86814	3.25235	LASP1;TYROBP;PLAUR;B2M
Primary somatosensory area, nose, layer 5	4/301	0.175352	0.896405	0	0	1.86814	3.25235	LASP1;PPT1;PLAUR;B2M
Primary visual area, layer 4	4/301	0.175352	0.896405	0	0	1.86814	3.25235	CDKN1A;LASP1;CCL20;DUSP6
Retrosplenial area, dorsal part, layer 6a	4/301	0.175352	0.896405	0	0	1.86814	3.25235	CDKN1A;TMED9;S100A4;RPS27A
Retrosplenial area, lateral agranular part, layer 6b	4/301	0.175352	0.896405	0	0	1.86814	3.25235	CAP1;CDKN1A;YWHAB;S100A4
Superior colliculus, sensory related	4/301	0.175352	0.896405	0	0	1.86814	3.25235	MMP14;GDF15;S100A6;RPL27
Superior olivary complex, lateral part	4/301	0.175352	0.896405	0	0	1.86814	3.25235	RPL37;HLA-A;LCP1;MMP9
Supramammillary nucleus, medial part	4/301	0.175352	0.896405	0	0	1.86814	3.25235	IL1RN;S100A6;S100A4;TIMP1
Temporal association areas	4/301	0.175352	0.896405	0	0	1.86814	3.25235	YWHAB;PLAUR;PLIN2;RPS27A
Ventromedial hypothalamic nucleus, dorsomedial part	4/301	0.175352	0.896405	0	0	1.86814	3.25235	RPL5;SDC2;RPL35A;RPS12
Visceral area	4/301	0.175352	0.896405	0	0	1.86814	3.25235	LASP1;PPT1;PLAUR;IER3
anterior nuclei	4/301	0.175352	0.896405	0	0	1.86814	3.25235	CD63;RGS16;ITGB2;DBI
anterior paraventricular nucleus of thalamus	4/301	0.175352	0.896405	0	0	1.86814	3.25235	CD63;SDC2;RGS16;ITGB2
basal part of terminal hypothalamus	4/301	0.175352	0.896405	0	0	1.86814	3.25235	CD63;FCER1G;SDC2;S100A6
caudal interpeduncular nucleus	4/301	0.175352	0.896405	0	0	1.86814	3.25235	IL1RN;GRN;FCER1G;SPP1
caudal zona incerta	4/301	0.175352	0.896405	0	0	1.86814	3.25235	RPS8;SDC2;IL1B;RPL35A
core of P-DMH	4/301	0.175352	0.896405	0	0	1.86814	3.25235	GRN;SDC2;TIMP1;RPS12
dorsal part of alar p3	4/301	0.175352	0.896405	0	0	1.86814	3.25235	CD63;SDC2;RGS16;DBI
dorsal part of m1A	4/301	0.175352	0.896405	0	0	1.86814	3.25235	RPS8;RPL27A;RPL37A;RPS24
dorsal septopreoptic nucleus	4/301	0.175352	0.896405	0	0	1.86814	3.25235	SDC2;CANX;RPS21;RPS12
dorsomedial part of VMH	4/301	0.175352	0.896405	0	0	1.86814	3.25235	RPL5;SDC2;RPL35A;RPS12
first (dorsal) preoptic domain	4/301	0.175352	0.896405	0	0	1.86814	3.25235	NRG4;SDC2;RPS21;RPS12
frontal cortex	4/301	0.175352	0.896405	0	0	1.86814	3.25235	IL1RN;TMED9;TYROBP;SH3BGRL3
intermediate part of PHyB	4/301	0.175352	0.896405	0	0	1.86814	3.25235	GRN;CD81;SDC2;TIMP1
intermediate part of THyB	4/301	0.175352	0.896405	0	0	1.86814	3.25235	CD63;FCER1G;SDC2;S100A6
intermediate stratum of Mam	4/301	0.175352	0.896405	0	0	1.86814	3.25235	IL1RN;S100A6;RPL37;TIMP1
intermediate stratum of PHyB-D	4/301	0.175352	0.896405	0	0	1.86814	3.25235	SDC2;RPL35A;PFDN5;RPS12
intermediate stratum of PThE	4/301	0.175352	0.896405	0	0	1.86814	3.25235	CD63;SDC2;RGS16;DBI
intermediate stratum of THyB-P	4/301	0.175352	0.896405	0	0	1.86814	3.25235	FCER1G;CANX;S100A6;RPL37
intermediate stratum of cerebellar vermis	4/301	0.175352	0.896405	0	0	1.86814	3.25235	CD63;BTG1;ITGB2;S100A4
intermediate stratum of r1BL	4/301	0.175352	0.896405	0	0	1.86814	3.25235	MMP14;RPS18;NRG4;RPL37
intermediate stratum of r1Lim	4/301	0.175352	0.896405	0	0	1.86814	3.25235	RPS18;RPL37;LCP1;MMP9
intermediate stratum of the PBC	4/301	0.175352	0.896405	0	0	1.86814	3.25235	RPS18;PRDX1;MSN;SERF2
lateral part of MM	4/301	0.175352	0.896405	0	0	1.86814	3.25235	IL1RN;FCER1G;S100A6;RPL37
lateral part of MPO	4/301	0.175352	0.896405	0	0	1.86814	3.25235	RPS19;SDC2;RPS21;RPS12
lateral septal nucleus, intermediate part, periventricular	4/301	0.175352	0.896405	0	0	1.86814	3.25235	CD63;MMP14;DBI;B2M
lateral superior olive	4/301	0.175352	0.896405	0	0	1.86814	3.25235	NRG4;LAPTM5;HLA-A;LCP1
layer 3 of InsCx	4/301	0.175352	0.896405	0	0	1.86814	3.25235	IL1RN;GRN;PLAUR;LAPTM5
layer 5 of FCx	4/301	0.175352	0.896405	0	0	1.86814	3.25235	LASP1;TMED9;TYROBP;SH3BGRL3
locus coeruleus	4/301	0.175352	0.896405	0	0	1.86814	3.25235	RPS18;PRDX1;RPL37A;PLIN2
lower basal lateral hypothalamic area	4/301	0.175352	0.896405	0	0	1.86814	3.25235	CD81;RPL35A;PHLDA1;PFDN5
mammillary area	4/301	0.175352	0.896405	0	0	1.86814	3.25235	IL1RN;S100A6;RPL37;TIMP1
mammillary part of THyB	4/301	0.175352	0.896405	0	0	1.86814	3.25235	IL1RN;S100A6;RPL37;TIMP1
mantle zone of FCx	4/301	0.175352	0.896405	0	0	1.86814	3.25235	IL1RN;TMED9;TYROBP;SH3BGRL3
mantle zone of Mam	4/301	0.175352	0.896405	0	0	1.86814	3.25235	IL1RN;S100A6;RPL37;TIMP1
mantle zone of PHyB-I	4/301	0.175352	0.896405	0	0	1.86814	3.25235	GRN;CD81;SDC2;TIMP1
mantle zone of PHyB-P	4/301	0.175352	0.896405	0	0	1.86814	3.25235	CD81;SDC2;RPL37A;PFDN5
mantle zone of PO1	4/301	0.175352	0.896405	0	0	1.86814	3.25235	NRG4;SDC2;RPS21;RPS12
mantle zone of PThE	4/301	0.175352	0.896405	0	0	1.86814	3.25235	CD63;SDC2;RGS16;DBI
mantle zone of SePal	4/301	0.175352	0.896405	0	0	1.86814	3.25235	NRG4;ACTN1;SDC2;PHLDA1
mantle zone of THyB-I	4/301	0.175352	0.896405	0	0	1.86814	3.25235	CD63;FCER1G;SDC2;S100A6
mantle zone of m1AD	4/301	0.175352	0.896405	0	0	1.86814	3.25235	RPS8;RPL27A;RPL37A;RPS24
mantle zone of r3BM	4/301	0.175352	0.896405	0	0	1.86814	3.25235	GRN;SLC20A1;HMGA1;SPP1
medial (main) part of Med	4/301	0.175352	0.896405	0	0	1.86814	3.25235	CD63;ITGB2;S100A4;HSPG2
medial parabrachial nucleus	4/301	0.175352	0.896405	0	0	1.86814	3.25235	RPS18;PRDX1;MSN;SERF2
medial part of r3B	4/301	0.175352	0.896405	0	0	1.86814	3.25235	GRN;SLC20A1;HMGA1;SPP1
nucleus of the stria medullaris (prethalamic)	4/301	0.175352	0.896405	0	0	1.86814	3.25235	CD63;SDC2;RGS16;DBI
oval paracentral nucleus	4/301	0.175352	0.896405	0	0	1.86814	3.25235	IL1B;RGS16;ITGB2;IER3
parastrial preoptic nucleus	4/301	0.175352	0.896405	0	0	1.86814	3.25235	IL1B;TAGLN2;RPS21;RPS12
paraventricular nucleus, lateral part	4/301	0.175352	0.896405	0	0	1.86814	3.25235	RPL35A;RPS27A;PFDN5;RPS12
perimammillary part of PHyB	4/301	0.175352	0.896405	0	0	1.86814	3.25235	CD81;SDC2;RPL37A;PFDN5
periventricular stratum of OB	4/301	0.175352	0.896405	0	0	1.86814	3.25235	IL1RN;CDKN1A;BTG1;IL1B
periventricular stratum of PO1	4/301	0.175352	0.896405	0	0	1.86814	3.25235	SDC2;RGS16;RPS21;RPS12
periventricular stratum of PalSe	4/301	0.175352	0.896405	0	0	1.86814	3.25235	CD63;MMP14;DBI;B2M
periventricular stratum of RMa	4/301	0.175352	0.896405	0	0	1.86814	3.25235	IL1RN;S100A6;S100A4;TIMP1
periventricular stratum of p3ZL	4/301	0.175352	0.896405	0	0	1.86814	3.25235	RPS8;CANX;LAPTM5;PFDN5
periventricular stratum of r10Tr	4/301	0.175352	0.896405	0	0	1.86814	3.25235	PPT1;MSN;TAGLN2;PLIN2
periventricular stratum of r1BL	4/301	0.175352	0.896405	0	0	1.86814	3.25235	RPS18;PRDX1;RPL37A;PLIN2
posterobasal nucleus, intermediate part	4/301	0.175352	0.896405	0	0	1.86814	3.25235	SDC2;TIMP1;PFDN5;RPS12
prethalamic eminence	4/301	0.175352	0.896405	0	0	1.86814	3.25235	CD63;SDC2;RGS16;DBI
r1 part of basolateral reticular formation	4/301	0.175352	0.896405	0	0	1.86814	3.25235	MMP14;RPS18;NRG4;RPL37
r1 part of ventral parvicellular reticular formation	4/301	0.175352	0.896405	0	0	1.86814	3.25235	RPS18;RPL37;LCP1;MMP9
r10 part of solitary complex	4/301	0.175352	0.896405	0	0	1.86814	3.25235	PPT1;MSN;TAGLN2;PLIN2
r2 part of lateral pontine nuclei	4/301	0.175352	0.896405	0	0	1.86814	3.25235	NRG4;SPP1;HLA-A;HSPG2
r9 part of nucleus gracilis	4/301	0.175352	0.896405	0	0	1.86814	3.25235	GDF15;TAGLN2;DBI;PLIN2
retromammillary area, medial part	4/301	0.175352	0.896405	0	0	1.86814	3.25235	IL1RN;S100A6;S100A4;TIMP1
rostral interpeduncular nucleus	4/301	0.175352	0.896405	0	0	1.86814	3.25235	IL1RN;GRN;FCER1G;SDC2
rostral interstitial nucleus	4/301	0.175352	0.896405	0	0	1.86814	3.25235	RPS8;SDC2;HSPG2;PFDN5
rostromedial tegmental nucleus	4/301	0.175352	0.896405	0	0	1.86814	3.25235	GRN;FCER1G;SPP1;RPL37
septopallidal transition area	4/301	0.175352	0.896405	0	0	1.86814	3.25235	NRG4;ACTN1;SDC2;PHLDA1
shell of p3ZL	4/301	0.175352	0.896405	0	0	1.86814	3.25235	RPS8;CANX;LAPTM5;PFDN5
superficial stratum of FCx (cortical plate/marginal zone)	4/301	0.175352	0.896405	0	0	1.86814	3.25235	IL1RN;TMED9;TYROBP;SH3BGRL3
superficial stratum of OB	4/301	0.175352	0.896405	0	0	1.86814	3.25235	IL1RN;FCER1G;IL1B;PLIN2
superficial stratum of p1B	4/301	0.175352	0.896405	0	0	1.86814	3.25235	GRN;SDC2;PABPC4;TIMP1
superficial stratum of r1BM	4/301	0.175352	0.896405	0	0	1.86814	3.25235	IL1RN;GRN;FCER1G;SDC2
superficial stratum of r2BI	4/301	0.175352	0.896405	0	0	1.86814	3.25235	NRG4;SPP1;HLA-A;HSPG2
superficial stratum of r2BM	4/301	0.175352	0.896405	0	0	1.86814	3.25235	GRN;FCER1G;SPP1;RPL37
tegmental field of p3 (Forel's field)	4/301	0.175352	0.896405	0	0	1.86814	3.25235	RPS8;SDC2;RPL37A;RPS24
ventral pallium	4/301	0.175352	0.896405	0	0	1.86814	3.25235	IL1RN;CDKN1A;IL1B;PLIN2
Field CA2, stratum lacunosum-moleculare	5/421	0.191246	0.896405	0	0	1.66887	2.76064	MMP14;FCER1G;ITGB2;LAPTM5;PFN1
Dentate gyrus	4/320	0.203077	0.896405	0	0	1.75411	2.79634	TMED9;FAU;PFN1;RLF
Anterodorsal nucleus	4/354	0.255521	0.896405	0	0	1.58095	2.15713	CD63;MMP14;ITGB2;DBI
Suprachiasmatic nucleus	4/370	0.281117	0.896405	0	0	1.5106	1.91692	GRN;RGS16;TIMP1;RPS12
Medial mammillary nucleus	4/388	0.310368	0.896405	0	0	1.43846	1.683	IL1RN;S100A6;RPL37;TIMP1
A4 noradrenergic cell group	3/301	0.373054	0.896405	0	0	1.3865	1.36713	CD63;ITGB2;DBI
AOB, glomerular layer	3/301	0.373054	0.896405	0	0	1.3865	1.36713	IL1RN;RAB31;IL1B
AOB, internal plexiform layer	3/301	0.373054	0.896405	0	0	1.3865	1.36713	IL1RN;RAB31;IL1B
Agranular insular area	3/301	0.373054	0.896405	0	0	1.3865	1.36713	TYROBP;YWHAB;ACTN4
Agranular insular area, dorsal part, layer 6a	3/301	0.373054	0.896405	0	0	1.3865	1.36713	TYROBP;YWHAB;IER3
Agranular insular area, ventral part, layer 2/3	3/301	0.373054	0.896405	0	0	1.3865	1.36713	GRN;TYROBP;PLAUR
Anterior cingulate area, dorsal part, layer 2/3	3/301	0.373054	0.896405	0	0	1.3865	1.36713	IL1RN;TMED9;S100A6
Anterior olfactory nucleus, layer 1	3/301	0.373054	0.896405	0	0	1.3865	1.36713	IL1RN;GDF15;LAPTM5
Anterolateral visual area, layer 2/3	3/301	0.373054	0.896405	0	0	1.3865	1.36713	CCL20;PLAUR;DUSP6
Anterolateral visual area, layer 5	3/301	0.373054	0.896405	0	0	1.3865	1.36713	PLAUR;RPS27A;TPT1
Anterolateral visual area, layer 6b	3/301	0.373054	0.896405	0	0	1.3865	1.36713	MYL6;PLAUR;IER3
Anteromedial visual area, layer 1	3/301	0.373054	0.896405	0	0	1.3865	1.36713	CDKN1A;TAGLN2;DUSP6
Anteromedial visual area, layer 4	3/301	0.373054	0.896405	0	0	1.3865	1.36713	CDKN1A;GAPDH;DUSP6
Anteroventral preoptic nucleus	3/301	0.373054	0.896405	0	0	1.3865	1.36713	FCER1G;NRG4;S100A4
Barrington's nucleus	3/301	0.373054	0.896405	0	0	1.3865	1.36713	RPS16;RPL35A;PLIN2
Bed nuclei of the stria terminalis	3/301	0.373054	0.896405	0	0	1.3865	1.36713	S100A6;RPS3;RPS21
Bed nuclei of the stria terminalis, anterior division	3/301	0.373054	0.896405	0	0	1.3865	1.36713	ACTN1;S100A6;RPS21
Bed nuclei of the stria terminalis, posterior division	3/301	0.373054	0.896405	0	0	1.3865	1.36713	SDC2;RPS3;RPS21
Bed nuclei of the stria terminalis, posterior division, interfascicular nucleus	3/301	0.373054	0.896405	0	0	1.3865	1.36713	SDC2;RPS27A;RPS21
Cerebellar nuclei	3/301	0.373054	0.896405	0	0	1.3865	1.36713	BTG1;ITGB2;S100A4
Dentate gyrus, granule cell layer	3/301	0.373054	0.896405	0	0	1.3865	1.36713	TMED9;FAU;RLF
Dentate gyrus, polymorph layer	3/301	0.373054	0.896405	0	0	1.3865	1.36713	TMED9;FAU;RLF
Dorsal cochlear nucleus	3/301	0.373054	0.896405	0	0	1.3865	1.36713	MMP14;CCL20;LCP1
Ectorhinal area/Layer 5	3/301	0.373054	0.896405	0	0	1.3865	1.36713	YWHAB;PLIN2;RPS27A
Field CA1, stratum pyramidale	3/301	0.373054	0.896405	0	0	1.3865	1.36713	YWHAB;PFN1;DUSP6
Field CA2, pyramidal layer	3/301	0.373054	0.896405	0	0	1.3865	1.36713	MMP14;ITGB2;PFN1
Field CA3, pyramidal layer	3/301	0.373054	0.896405	0	0	1.3865	1.36713	TMED9;PFN1;RLF
Field CA3, stratum lucidum	3/301	0.373054	0.896405	0	0	1.3865	1.36713	TMED9;PFN1;RLF
Field CA3, stratum pyramidale	3/301	0.373054	0.896405	0	0	1.3865	1.36713	TMED9;LAPTM5;PFN1
Flocculus, molecular layer	3/301	0.373054	0.896405	0	0	1.3865	1.36713	BTG1;ITGB2;LCP1
Globus pallidus, internal segment	3/301	0.373054	0.896405	0	0	1.3865	1.36713	RAB31;CCL20;PABPC4
Gustatory areas	3/301	0.373054	0.896405	0	0	1.3865	1.36713	TYROBP;PLAUR;ACTN4
Hypothalamus	3/301	0.373054	0.896405	0	0	1.3865	1.36713	SDC2;RPS21;RPS12
Infralimbic area, layer 2	3/301	0.373054	0.896405	0	0	1.3865	1.36713	RAB31;FCER1G;GDF15
Infralimbic area, layer 5	3/301	0.373054	0.896405	0	0	1.3865	1.36713	CDKN1A;S100A6;DUSP6
JcP contribution to LTL	3/301	0.373054	0.896405	0	0	1.3865	1.36713	GDF15;RGS16;RPL37
JcPL part of the periaqueductal gray	3/301	0.373054	0.896405	0	0	1.3865	1.36713	CD63;RPL27;DBI
Lateral septal nucleus, caudal (caudodorsal) part	3/301	0.373054	0.896405	0	0	1.3865	1.36713	MMP14;DBI;B2M
Lateral visual area, layer 6b	3/301	0.373054	0.896405	0	0	1.3865	1.36713	CAP1;CDKN1A;PLAUR
Lingula (I), granular layer	3/301	0.373054	0.896405	0	0	1.3865	1.36713	CD63;ITGB2;CTSD
Main olfactory bulb, granule layer	3/301	0.373054	0.896405	0	0	1.3865	1.36713	IL1RN;CDKN1A;BTG1
Main olfactory bulb, inner plexiform layer	3/301	0.373054	0.896405	0	0	1.3865	1.36713	IL1RN;CDKN1A;IL1B
Main olfactory bulb, mitral layer	3/301	0.373054	0.896405	0	0	1.3865	1.36713	IL1RN;CDKN1A;IL1B
Mammillary body	3/301	0.373054	0.896405	0	0	1.3865	1.36713	S100A6;RPL37;TIMP1
Medial pretectal area	3/301	0.373054	0.896405	0	0	1.3865	1.36713	CD63;SDC2;DBI
Median preoptic nucleus	3/301	0.373054	0.896405	0	0	1.3865	1.36713	SDC2;TIMP1;RPS12
Midbrain raphe nuclei	3/301	0.373054	0.896405	0	0	1.3865	1.36713	IL1RN;SDC2;TIMP1
Midbrain trigeminal nucleus	3/301	0.373054	0.896405	0	0	1.3865	1.36713	RPS18;PRDX1;RPL37A
Midbrain, behavioral state related	3/301	0.373054	0.896405	0	0	1.3865	1.36713	IL1RN;SDC2;TIMP1
Midline group of the dorsal thalamus	3/301	0.373054	0.896405	0	0	1.3865	1.36713	SDC2;RGS16;LAPTM5
Nodulus (X), granular layer	3/301	0.373054	0.896405	0	0	1.3865	1.36713	CD63;ITGB2;HSPG2
Nucleus ambiguus	3/301	0.373054	0.896405	0	0	1.3865	1.36713	NRG4;HLA-A;ZMPSTE24
Nucleus ambiguus, ventral division	3/301	0.373054	0.896405	0	0	1.3865	1.36713	NRG4;HLA-A;ZMPSTE24
Nucleus of the lateral olfactory tract, layer 3	3/301	0.373054	0.896405	0	0	1.3865	1.36713	TUBA1B;RPS19;PHLDA1
Nucleus of the solitary tract, gelatinous part	3/301	0.373054	0.896405	0	0	1.3865	1.36713	GDF15;TAGLN2;PLIN2
OB inner plexiform layer	3/301	0.373054	0.896405	0	0	1.3865	1.36713	IL1RN;CDKN1A;IL1B
OB olfactory fiber layer	3/301	0.373054	0.896405	0	0	1.3865	1.36713	FCER1G;IL1B;PLIN2
Orbital area	3/301	0.373054	0.896405	0	0	1.3865	1.36713	IL1RN;FCER1G;S100A6
Orbital area, medial part, layer 1	3/301	0.373054	0.896405	0	0	1.3865	1.36713	IL1RN;FCER1G;HSPG2
Orbital area, ventrolateral part, layer 6a	3/301	0.373054	0.896405	0	0	1.3865	1.36713	CDKN1A;TYROBP;S100A6
Pallidum, caudal region	3/301	0.373054	0.896405	0	0	1.3865	1.36713	S100A6;RPS3;RPS21
Parabrachial nucleus, lateral division, central lateral part	3/301	0.373054	0.896405	0	0	1.3865	1.36713	RPS18;MSN;SERF2
Parabrachial nucleus, lateral division, ventral lateral part	3/301	0.373054	0.896405	0	0	1.3865	1.36713	RPS18;PRDX1;LAPTM5
Parabrachial nucleus, medial division	3/301	0.373054	0.896405	0	0	1.3865	1.36713	RPS18;PRDX1;MSN
Parabrachial nucleus, medial division, medial medial part	3/301	0.373054	0.896405	0	0	1.3865	1.36713	RPS18;PRDX1;MSN
Paraflocculus, granular layer	3/301	0.373054	0.896405	0	0	1.3865	1.36713	BTG1;LCP1;ZMPSTE24
Parasolitary nucleus	3/301	0.373054	0.896405	0	0	1.3865	1.36713	S100A6;TAGLN2;PLIN2
Parataenial nucleus	3/301	0.373054	0.896405	0	0	1.3865	1.36713	SDC2;RGS16;DBI
Paraventricular nucleus of the thalamus	3/301	0.373054	0.896405	0	0	1.3865	1.36713	CD63;SDC2;RGS16
Pedunculopontine nucleus	3/301	0.373054	0.896405	0	0	1.3865	1.36713	RPS18;RPS6;RPL35A
Periventricular zone	3/301	0.373054	0.896405	0	0	1.3865	1.36713	CD63;SDC2;RPS12
Pontine gray	3/301	0.373054	0.896405	0	0	1.3865	1.36713	SLC20A1;SPP1;TIMP1
Posterior parietal association areas	3/301	0.373054	0.896405	0	0	1.3865	1.36713	CDKN1A;HSPG2;DUSP6
Posterior parietal association areas, layer 4	3/301	0.373054	0.896405	0	0	1.3865	1.36713	CDKN1A;HSPG2;DUSP6
Posterior parietal association areas, layer 5	3/301	0.373054	0.896405	0	0	1.3865	1.36713	CDKN1A;LASP1;DUSP6
Posterior parietal association areas, layer 6b	3/301	0.373054	0.896405	0	0	1.3865	1.36713	CDKN1A;PFN1;DUSP6
Posterolateral visual area	3/301	0.373054	0.896405	0	0	1.3865	1.36713	LASP1;PLAUR;DUSP6
Posterolateral visual area, layer 2/3	3/301	0.373054	0.896405	0	0	1.3865	1.36713	LASP1;PLAUR;DUSP6
Posterolateral visual area, layer 4	3/301	0.373054	0.896405	0	0	1.3865	1.36713	LASP1;PLAUR;DUSP6
Postsubiculum, layer 1	3/301	0.373054	0.896405	0	0	1.3865	1.36713	FCER1G;GDF15;S100A6
Prelimbic area, layer 5	3/301	0.373054	0.896405	0	0	1.3865	1.36713	IL1RN;YWHAB;PPT1
Prelimbic area, layer 6a	3/301	0.373054	0.896405	0	0	1.3865	1.36713	TMED9;S100A6;SH3BGRL3
Primary somatosensory area, barrel field	3/301	0.373054	0.896405	0	0	1.3865	1.36713	LASP1;PPT1;PLAUR
Primary somatosensory area, barrel field, layer 6a	3/301	0.373054	0.896405	0	0	1.3865	1.36713	LASP1;PPT1;PLAUR
Primary somatosensory area, barrel field, layer 6b	3/301	0.373054	0.896405	0	0	1.3865	1.36713	PLAUR;ACTN4;IER3
Primary somatosensory area, mouth	3/301	0.373054	0.896405	0	0	1.3865	1.36713	TYROBP;PLAUR;ACTN4
Primary somatosensory area, mouth, layer 6a	3/301	0.373054	0.896405	0	0	1.3865	1.36713	LASP1;TYROBP;PPT1
Primary somatosensory area, nose, layer 6b	3/301	0.373054	0.896405	0	0	1.3865	1.36713	TYROBP;PLAUR;ACTN4
Primary visual area	3/301	0.373054	0.896405	0	0	1.3865	1.36713	CDKN1A;CCL20;DUSP6
Primary visual area, layer 6a	3/301	0.373054	0.896405	0	0	1.3865	1.36713	CDKN1A;LASP1;DUSP6
Retrosplenial area, lateral agranular part	3/301	0.373054	0.896405	0	0	1.3865	1.36713	CDKN1A;S100A4;DUSP6
Retrosplenial area, lateral agranular part, layer 1	3/301	0.373054	0.896405	0	0	1.3865	1.36713	CDKN1A;PABPC4;DUSP6
Retrosplenial area, lateral agranular part, layer 5	3/301	0.373054	0.896405	0	0	1.3865	1.36713	CDKN1A;S100A4;DUSP6
Secondary motor area, layer 5	3/301	0.373054	0.896405	0	0	1.3865	1.36713	TMED9;TYROBP;SH3BGRL3
Secondary motor area, layer 6a	3/301	0.373054	0.896405	0	0	1.3865	1.36713	TMED9;TYROBP;SH3BGRL3
Subparafascicular area	3/301	0.373054	0.896405	0	0	1.3865	1.36713	SDC2;RGS16;PFDN5
Substantia nigra, reticular part	3/301	0.373054	0.896405	0	0	1.3865	1.36713	GRN;PABPC4;MMP9
Superior colliculus, optic layer	3/301	0.373054	0.896405	0	0	1.3865	1.36713	GDF15;S100A6;RPL27
Superior colliculus, superficial gray layer	3/301	0.373054	0.896405	0	0	1.3865	1.36713	MMP14;GDF15;RPL27
Superior colliculus, zonal layer	3/301	0.373054	0.896405	0	0	1.3865	1.36713	MMP14;GDF15;S100A6
Superior olivary complex	3/301	0.373054	0.896405	0	0	1.3865	1.36713	NRG4;SPP1;HLA-A
Superior olivary complex, periolivary region	3/301	0.373054	0.896405	0	0	1.3865	1.36713	NRG4;SPP1;HLA-A
Supplemental somatosensory area	3/301	0.373054	0.896405	0	0	1.3865	1.36713	PPT1;PLAUR;IER3
Supplemental somatosensory area, layer 6a	3/301	0.373054	0.896405	0	0	1.3865	1.36713	PPT1;PLAUR;IER3
Supplemental somatosensory area, layer 6b	3/301	0.373054	0.896405	0	0	1.3865	1.36713	PPT1;PLAUR;IER3
Taenia tecta, dorsal part	3/301	0.373054	0.896405	0	0	1.3865	1.36713	FCER1G;GDF15;S100A4
Taenia tecta, dorsal part, layer 1	3/301	0.373054	0.896405	0	0	1.3865	1.36713	FCER1G;GDF15;S100A4
Taenia tecta, ventral part	3/301	0.373054	0.896405	0	0	1.3865	1.36713	FCER1G;GDF15;FTH1
Taenia tecta, ventral part, layer 1	3/301	0.373054	0.896405	0	0	1.3865	1.36713	FCER1G;GDF15;FTH1
Temporal association areas, layer 5	3/301	0.373054	0.896405	0	0	1.3865	1.36713	PLAUR;PLIN2;RPS27A
Temporal association areas, layer 6a	3/301	0.373054	0.896405	0	0	1.3865	1.36713	YWHAB;PLAUR;PLIN2
Ventral posterolateral nucleus of the thalamus, parvicellular part	3/301	0.373054	0.896405	0	0	1.3865	1.36713	IL1B;RGS16;ATP5G3
Visceral area, layer 6a	3/301	0.373054	0.896405	0	0	1.3865	1.36713	PPT1;PLAUR;IER3
Visceral area, layer 6b	3/301	0.373054	0.896405	0	0	1.3865	1.36713	PLAUR;IER3;MTDH
anterior pretectal nucleus, dorsal core part	3/301	0.373054	0.896405	0	0	1.3865	1.36713	RGS16;LAPTM5;S100A4
anteroventral periventricular preoptic nucleus	3/301	0.373054	0.896405	0	0	1.3865	1.36713	FCER1G;RGS16;RPS12
basal peduncular hypothalamus	3/301	0.373054	0.896405	0	0	1.3865	1.36713	GRN;SDC2;TIMP1
basal plate of p3	3/301	0.373054	0.896405	0	0	1.3865	1.36713	SDC2;PABPC4;IL1B
bed nucleus of stria terminalis, lateral amygdaloid division	3/301	0.373054	0.896405	0	0	1.3865	1.36713	CD63;ITGB2;DBI
bed nucleus of the external capsule	3/301	0.373054	0.896405	0	0	1.3865	1.36713	CAP1;TYROBP;ACTN1
central amygdaloid nucleus, medial part	3/301	0.373054	0.896405	0	0	1.3865	1.36713	PABPC4;MSN;PLIN2
colliculus superior	3/301	0.373054	0.896405	0	0	1.3865	1.36713	GDF15;S100A6;RPL27
dorsal paracommissural tectal nucleus, m1 part	3/301	0.373054	0.896405	0	0	1.3865	1.36713	RPS8;RPL37A;RPS24
dorsal part of PcP	3/301	0.373054	0.896405	0	0	1.3865	1.36713	RPS18;RPS6;FAU
dorsal part of alar p2	3/301	0.373054	0.896405	0	0	1.3865	1.36713	CD63;MMP14;ITGB2
dorsal periolivary nucleus	3/301	0.373054	0.896405	0	0	1.3865	1.36713	SPP1;HLA-A;LCP1
dorsolateral isthmic part of the dorsal raphe nucleus	3/301	0.373054	0.896405	0	0	1.3865	1.36713	SDC2;RPS6;RPL37A
dorsomedial preoptic area, superficial part	3/301	0.373054	0.896405	0	0	1.3865	1.36713	FCER1G;NRG4;S100A4
ethmoid nucleus	3/301	0.373054	0.896405	0	0	1.3865	1.36713	RGS16;S100A4;IER3
external part of AOD	3/301	0.373054	0.896405	0	0	1.3865	1.36713	IL1RN;RAB31;GDF15
habenula (old epithalamus)	3/301	0.373054	0.896405	0	0	1.3865	1.36713	CD63;MMP14;ITGB2
intercalate nucleus	3/301	0.373054	0.896405	0	0	1.3865	1.36713	RAB31;RGS16;RPL27
intermediate stratum of APal	3/301	0.373054	0.896405	0	0	1.3865	1.36713	PABPC4;MSN;PLIN2
intermediate stratum of Hb	3/301	0.373054	0.896405	0	0	1.3865	1.36713	CD63;SDC2;RGS16
intermediate stratum of ITTh	3/301	0.373054	0.896405	0	0	1.3865	1.36713	RGS16;S100A4;IER3
intermediate stratum of LPrP	3/301	0.373054	0.896405	0	0	1.3865	1.36713	TYROBP;YWHAB;IER3
intermediate stratum of OB	3/301	0.373054	0.896405	0	0	1.3865	1.36713	IL1RN;CDKN1A;IL1B
intermediate stratum of PO1	3/301	0.373054	0.896405	0	0	1.3865	1.36713	NRG4;RPS21;RPS12
intermediate stratum of PPaA	3/301	0.373054	0.896405	0	0	1.3865	1.36713	CD81;RPL11;RPS21
intermediate stratum of PcPL	3/301	0.373054	0.896405	0	0	1.3865	1.36713	RGS16;LAPTM5;S100A4
intermediate stratum of THyB-D	3/301	0.373054	0.896405	0	0	1.3865	1.36713	FCER1G;SDC2;RPS12
intermediate stratum of p2B	3/301	0.373054	0.896405	0	0	1.3865	1.36713	RPS8;SDC2;RGS16
intermediate stratum of p2ZL	3/301	0.373054	0.896405	0	0	1.3865	1.36713	IL1B;RGS16;RPL27
intermediate stratum of p3ZL	3/301	0.373054	0.896405	0	0	1.3865	1.36713	RAB31;RGS16;RPL27
intermediate stratum of r10BL	3/301	0.373054	0.896405	0	0	1.3865	1.36713	NRG4;HMGA1;S100A4
intermediate stratum of r6Lim	3/301	0.373054	0.896405	0	0	1.3865	1.36713	MSN;TAGLN2;LCP1
intermediate stratum of r7Lim	3/301	0.373054	0.896405	0	0	1.3865	1.36713	NRG4;TAGLN2;HLA-A
intermediate stratum of r9BL	3/301	0.373054	0.896405	0	0	1.3865	1.36713	NRG4;HMGA1;S100A4
interstitial nucleus of the zona limitans	3/301	0.373054	0.896405	0	0	1.3865	1.36713	IL1B;RGS16;RPL27
isthmic liminal part of the periaqueductal gray	3/301	0.373054	0.896405	0	0	1.3865	1.36713	RPS8;RPL37A;RPS11
isthmic roof plate	3/301	0.373054	0.896405	0	0	1.3865	1.36713	CD63;BTG1;DBI
isthmic vestibulocerebellar nucleus	3/301	0.373054	0.896405	0	0	1.3865	1.36713	PRDX1;DBI;B2M
juxtacommissural pretectal domain	3/301	0.373054	0.896405	0	0	1.3865	1.36713	RPL27A;RGS16;LAPTM5
lateral (dentate) cerebellar nucleus	3/301	0.373054	0.896405	0	0	1.3865	1.36713	CCL20;ITGB2;DBI
lateral anterior hypothalamic nucleus	3/301	0.373054	0.896405	0	0	1.3865	1.36713	RGS16;CANX;RPS21
lateral pallium	3/301	0.373054	0.896405	0	0	1.3865	1.36713	IL1RN;TYROBP;PLAUR
lateral part of preisthmic periaqueductal gray	3/301	0.373054	0.896405	0	0	1.3865	1.36713	RPS18;RPS8;HMGA1
lateral part of r10B	3/301	0.373054	0.896405	0	0	1.3865	1.36713	NRG4;HMGA1;S100A4
lateral part of r1B	3/301	0.373054	0.896405	0	0	1.3865	1.36713	RPS18;PRDX1;PLIN2
lateral part of r5B	3/301	0.373054	0.896405	0	0	1.3865	1.36713	NRG4;PABPC4;SPP1
lateral part of r6B	3/301	0.373054	0.896405	0	0	1.3865	1.36713	NRG4;MSN;HLA-A
lateral part of r9B	3/301	0.373054	0.896405	0	0	1.3865	1.36713	NRG4;HMGA1;S100A4
laterodorsal nucleus	3/301	0.373054	0.896405	0	0	1.3865	1.36713	CD63;RGS16;ITGB2
layer 1 of AOD cortex	3/301	0.373054	0.896405	0	0	1.3865	1.36713	IL1RN;GDF15;LAPTM5
layer 3 of OCx	3/301	0.373054	0.896405	0	0	1.3865	1.36713	CDKN1A;HLA-A;DUSP6
layer 6 of FCx	3/301	0.373054	0.896405	0	0	1.3865	1.36713	LASP1;TMED9;TYROBP
layer 6 of PCx	3/301	0.373054	0.896405	0	0	1.3865	1.36713	LASP1;PPT1;IER3
liminal part of alar r1	3/301	0.373054	0.896405	0	0	1.3865	1.36713	RPS18;RPL37;LCP1
liminal part of r4 alar plate	3/301	0.373054	0.896405	0	0	1.3865	1.36713	PRDX1;SPP1;MMP9
liminal part of the r5 alar plate	3/301	0.373054	0.896405	0	0	1.3865	1.36713	PRDX1;SPP1;MMP9
liminal part of the r6 alar plate	3/301	0.373054	0.896405	0	0	1.3865	1.36713	NRG4;MSN;HLA-A
liminal part of the r7 alar plate	3/301	0.373054	0.896405	0	0	1.3865	1.36713	NRG4;TAGLN2;HLA-A
liminal periaqueductal gray of m2	3/301	0.373054	0.896405	0	0	1.3865	1.36713	RPL30;HMGA1;RPS11
lower basal perifornical nucleus	3/301	0.373054	0.896405	0	0	1.3865	1.36713	CD81;RPL37A;PFDN5
m1 part of parabrachialis pigmentosus	3/301	0.373054	0.896405	0	0	1.3865	1.36713	FTH1;SDC2;ZMPSTE24
m1AD (DM) part of periaqueductal gray	3/301	0.373054	0.896405	0	0	1.3865	1.36713	RPL27A;RPS6;RPL37A
m2 part of nucleus parabrachialis pigmentosus	3/301	0.373054	0.896405	0	0	1.3865	1.36713	FTH1;SDC2;ZMPSTE24
m2 part of paranigral nucleus	3/301	0.373054	0.896405	0	0	1.3865	1.36713	GRN;FCER1G;SDC2
magnocellular (medial) subparafascicular nucleus	3/301	0.373054	0.896405	0	0	1.3865	1.36713	SDC2;IL1B;RGS16
mammillary part of PHyB	3/301	0.373054	0.896405	0	0	1.3865	1.36713	IL1RN;S100A6;TIMP1
mantle zone of AOB	3/301	0.373054	0.896405	0	0	1.3865	1.36713	IL1RN;RAB31;IL1B
mantle zone of Hb	3/301	0.373054	0.896405	0	0	1.3865	1.36713	CD63;MMP14;ITGB2
mantle zone of OB	3/301	0.373054	0.896405	0	0	1.3865	1.36713	IL1RN;CDKN1A;IL1B
mantle zone of PPaA	3/301	0.373054	0.896405	0	0	1.3865	1.36713	RPL11;RPS3;RPS21
mantle zone of PcPD	3/301	0.373054	0.896405	0	0	1.3865	1.36713	RPS18;RPS6;FAU
mantle zone of RMa	3/301	0.373054	0.896405	0	0	1.3865	1.36713	IL1RN;S100A6;TIMP1
mantle zone of SC	3/301	0.373054	0.896405	0	0	1.3865	1.36713	GDF15;S100A6;RPL27
mantle zone of THyB-P	3/301	0.373054	0.896405	0	0	1.3865	1.36713	FCER1G;S100A6;RPL37
mantle zone of r10BL	3/301	0.373054	0.896405	0	0	1.3865	1.36713	NRG4;HMGA1;S100A4
mantle zone of r1BL	3/301	0.373054	0.896405	0	0	1.3865	1.36713	RPS18;PRDX1;PLIN2
mantle zone of r1Lim	3/301	0.373054	0.896405	0	0	1.3865	1.36713	RPS18;RPL37;LCP1
mantle zone of r4Lim	3/301	0.373054	0.896405	0	0	1.3865	1.36713	PRDX1;SPP1;MMP9
mantle zone of r5BL	3/301	0.373054	0.896405	0	0	1.3865	1.36713	NRG4;PABPC4;SPP1
mantle zone of r5Lim	3/301	0.373054	0.896405	0	0	1.3865	1.36713	PRDX1;SPP1;MMP9
mantle zone of r6BL	3/301	0.373054	0.896405	0	0	1.3865	1.36713	NRG4;MSN;HLA-A
mantle zone of r6Co	3/301	0.373054	0.896405	0	0	1.3865	1.36713	MMP14;CCL20;LCP1
mantle zone of r6Lim	3/301	0.373054	0.896405	0	0	1.3865	1.36713	NRG4;MSN;HLA-A
mantle zone of r7Lim	3/301	0.373054	0.896405	0	0	1.3865	1.36713	NRG4;TAGLN2;HLA-A
mantle zone of r9BL	3/301	0.373054	0.896405	0	0	1.3865	1.36713	NRG4;HMGA1;S100A4
mantle zone of the Fc	3/301	0.373054	0.896405	0	0	1.3865	1.36713	MMP14;IL1B;ITGB2
mantle zone of the PBC	3/301	0.373054	0.896405	0	0	1.3865	1.36713	RPS18;RPS8;MSN
medial habenular nucleus	3/301	0.373054	0.896405	0	0	1.3865	1.36713	CD63;MMP14;ITGB2
medial pallium (hippocampal allocortex)	3/301	0.373054	0.896405	0	0	1.3865	1.36713	LAPTM5;PFN1;RLF
medial superior olive	3/301	0.373054	0.896405	0	0	1.3865	1.36713	NRG4;PABPC4;IL1B
microcellular tegmental nucleus	3/301	0.373054	0.896405	0	0	1.3865	1.36713	MMP14;GRN;ITGB2
molecular layer of the DG	3/301	0.373054	0.896405	0	0	1.3865	1.36713	TMED9;PFN1;RLF
nucleus of the stria terminalis, medial division, ventral part	3/301	0.373054	0.896405	0	0	1.3865	1.36713	NRG4;RPL11;RPS21
olfactory bulb, principal part	3/301	0.373054	0.896405	0	0	1.3865	1.36713	IL1RN;CDKN1A;IL1B
optic fiber layer of SC	3/301	0.373054	0.896405	0	0	1.3865	1.36713	GDF15;S100A6;RPL27
p1 part of the substantia nigra reticulata	3/301	0.373054	0.896405	0	0	1.3865	1.36713	GRN;PABPC4;MMP9
p1B part of the periaqueductal gray	3/301	0.373054	0.896405	0	0	1.3865	1.36713	TIMP1;FAU;RPS24
p2 part of the zona limitans core population	3/301	0.373054	0.896405	0	0	1.3865	1.36713	RAB31;IL1B;RGS16
p3 part of the ZL core	3/301	0.373054	0.896405	0	0	1.3865	1.36713	RAB31;SDC2;RGS16
parabrachial complex	3/301	0.373054	0.896405	0	0	1.3865	1.36713	RPS18;RPS8;MSN
paraventricular nucleus, dorsal part	3/301	0.373054	0.896405	0	0	1.3865	1.36713	SDC2;RPS3;RPS12
paraventricular nucleus, peduncular or principal part	3/301	0.373054	0.896405	0	0	1.3865	1.36713	SDC2;CANX;RPS12
parvicellular interstitial nucleus of the posterior commissure	3/301	0.373054	0.896405	0	0	1.3865	1.36713	RPL27;FAU;PFDN5
parvicellular part of Lat	3/301	0.373054	0.896405	0	0	1.3865	1.36713	CCL20;ITGB2;DBI
parvocellular part of r8LRt	3/301	0.373054	0.896405	0	0	1.3865	1.36713	NRG4;TIMP1;MMP9
peduncular (caudal) hypothalamus	3/301	0.373054	0.896405	0	0	1.3865	1.36713	CD81;SDC2;RPS21
peduncular nucleus of the stria medullaris	3/301	0.373054	0.896405	0	0	1.3865	1.36713	TAGLN2;PHLDA1;RPS21
peduncular paraventricular area of PHyA	3/301	0.373054	0.896405	0	0	1.3865	1.36713	RPL11;RPS3;RPS21
perimammillary part of THyB	3/301	0.373054	0.896405	0	0	1.3865	1.36713	FCER1G;S100A6;RPL37
periventricular stratum of APal	3/301	0.373054	0.896405	0	0	1.3865	1.36713	CD63;ITGB2;DBI
periventricular stratum of Hb	3/301	0.373054	0.896405	0	0	1.3865	1.36713	CD63;MMP14;ITGB2
periventricular stratum of JcPL	3/301	0.373054	0.896405	0	0	1.3865	1.36713	CD63;RPL27;DBI
periventricular stratum of PPaA	3/301	0.373054	0.896405	0	0	1.3865	1.36713	SDC2;CANX;RPS12
periventricular stratum of VTTh	3/301	0.373054	0.896405	0	0	1.3865	1.36713	SDC2;IL1B;RGS16
periventricular stratum of isLim	3/301	0.373054	0.896405	0	0	1.3865	1.36713	RPS8;RPL37A;RPS11
periventricular stratum of m1AD	3/301	0.373054	0.896405	0	0	1.3865	1.36713	RPL27A;RPS6;RPL37A
periventricular stratum of m2AL	3/301	0.373054	0.896405	0	0	1.3865	1.36713	RPS18;RPS8;HMGA1
periventricular stratum of m2Lim	3/301	0.373054	0.896405	0	0	1.3865	1.36713	RPL30;HMGA1;RPS11
periventricular stratum of p1B	3/301	0.373054	0.896405	0	0	1.3865	1.36713	TIMP1;FAU;RPS24
periventricular stratum of r1Lim	3/301	0.373054	0.896405	0	0	1.3865	1.36713	RPS18;RPL37A;PLIN2
periventricular stratum of r4Ve	3/301	0.373054	0.896405	0	0	1.3865	1.36713	CD63;ITGB2;DBI
periventricular stratum of r7BM	3/301	0.373054	0.896405	0	0	1.3865	1.36713	ITGB2;TIMP1;FAU
periventricular stratum of r7Co	3/301	0.373054	0.896405	0	0	1.3865	1.36713	MMP14;CCL20;LCP1
periventricular stratum of r9Lim	3/301	0.373054	0.896405	0	0	1.3865	1.36713	MSN;TAGLN2;PLIN2
pontomedullary hindbrain	3/301	0.373054	0.896405	0	0	1.3865	1.36713	NRG4;SPP1;HSPG2
posterior paraventricular nucleus	3/301	0.373054	0.896405	0	0	1.3865	1.36713	CD63;SDC2;RGS16
posteromedial visual area, layer 1	3/301	0.373054	0.896405	0	0	1.3865	1.36713	S100A4;TAGLN2;DUSP6
posteromedial visual area, layer 2/3	3/301	0.373054	0.896405	0	0	1.3865	1.36713	CDKN1A;S100A4;DUSP6
posteromedial visual area, layer 5	3/301	0.373054	0.896405	0	0	1.3865	1.36713	CDKN1A;TUBA1B;DUSP6
posteromedial visual area, layer 6a	3/301	0.373054	0.896405	0	0	1.3865	1.36713	CDKN1A;TUBA1B;DUSP6
posteroventral part of alar p3	3/301	0.373054	0.896405	0	0	1.3865	1.36713	RAB31;RPS8;RGS16
prethalamic tegmentum	3/301	0.373054	0.896405	0	0	1.3865	1.36713	SDC2;PABPC4;IL1B
prosomere 1	3/301	0.373054	0.896405	0	0	1.3865	1.36713	SDC2;RGS16;LAPTM5
pyramidal layer of taenia tecta	3/301	0.373054	0.896405	0	0	1.3865	1.36713	FCER1G;GDF15;S100A4
r1 part of lateral pontine nuclei	3/301	0.373054	0.896405	0	0	1.3865	1.36713	GRN;NRG4;LAPTM5
r10 alar plate	3/301	0.373054	0.896405	0	0	1.3865	1.36713	MSN;TAGLN2;PLIN2
r10 part of basolateral reticular formation	3/301	0.373054	0.896405	0	0	1.3865	1.36713	NRG4;HMGA1;S100A4
r2 part of principal trigeminal sensory nucleus	3/301	0.373054	0.896405	0	0	1.3865	1.36713	CCL20;CFL1;SPP1
r3 part of lateral pontine nuclei	3/301	0.373054	0.896405	0	0	1.3865	1.36713	NRG4;SPP1;HLA-A
r4 part of parvocellular medial vestibular nucleus	3/301	0.373054	0.896405	0	0	1.3865	1.36713	CD63;ITGB2;DBI
r4 part of reticulotegmental nucleus, shell portion	3/301	0.373054	0.896405	0	0	1.3865	1.36713	GRN;SPP1;ZMPSTE24
r4 part of ventral lateral lemniscal nucleus	3/301	0.373054	0.896405	0	0	1.3865	1.36713	NRG4;SPP1;RPL37
r5 part of ventral lateral lemniscal nucleus	3/301	0.373054	0.896405	0	0	1.3865	1.36713	NRG4;SPP1;ND3
r6 part of the cochlear column	3/301	0.373054	0.896405	0	0	1.3865	1.36713	MMP14;CCL20;LCP1
r6 part of ventral parvicellular reticular formation	3/301	0.373054	0.896405	0	0	1.3865	1.36713	MSN;TAGLN2;LCP1
r7 part of the dorsal cochlear nucleus	3/301	0.373054	0.896405	0	0	1.3865	1.36713	MMP14;CCL20;LCP1
r7 part of ventral parvicellular reticular formation	3/301	0.373054	0.896405	0	0	1.3865	1.36713	NRG4;TAGLN2;HLA-A
r7 portion of ambiguous motor nucleus	3/301	0.373054	0.896405	0	0	1.3865	1.36713	MSN;TAGLN2;HLA-A
r7 portion of the hypoglossal motor nucleus	3/301	0.373054	0.896405	0	0	1.3865	1.36713	ITGB2;MSN;FAU
r8 part of lateral reticular nucleus	3/301	0.373054	0.896405	0	0	1.3865	1.36713	NRG4;IL1B;HLA-A
r9 part of external cuneate nucleus	3/301	0.373054	0.896405	0	0	1.3865	1.36713	HMGA1;TAGLN2;PLIN2
r9 part of the basolateral reticular formation	3/301	0.373054	0.896405	0	0	1.3865	1.36713	NRG4;HMGA1;S100A4
r9 part of the lateral reticular nucleus	3/301	0.373054	0.896405	0	0	1.3865	1.36713	NRG4;IL1B;S100A4
r9 portion of vagal motor nucleus (postmigratory)	3/301	0.373054	0.896405	0	0	1.3865	1.36713	MSN;TAGLN2;PLIN2
reticular formation of JcPL	3/301	0.373054	0.896405	0	0	1.3865	1.36713	GDF15;RGS16;LAPTM5
retromammillary area	3/301	0.373054	0.896405	0	0	1.3865	1.36713	IL1RN;S100A6;TIMP1
retrotrapezoid nucleus	3/301	0.373054	0.896405	0	0	1.3865	1.36713	NRG4;MSN;HLA-A
rostral periolivary nucleus	3/301	0.373054	0.896405	0	0	1.3865	1.36713	NRG4;PABPC4;HSPG2
rostral ventrolateral reticular area	3/301	0.373054	0.896405	0	0	1.3865	1.36713	NRG4;HLA-A;ZMPSTE24
septostriatal part of the olfactory tuberculum	3/301	0.373054	0.896405	0	0	1.3865	1.36713	GRN;NRG4;GDF15
subethmoid nucleus	3/301	0.373054	0.896405	0	0	1.3865	1.36713	RGS16;S100A4;IER3
sublayer 6a of FCx	3/301	0.373054	0.896405	0	0	1.3865	1.36713	LASP1;TMED9;TYROBP
sublayer 6a of OCx	3/301	0.373054	0.896405	0	0	1.3865	1.36713	CAP1;CDKN1A;DUSP6
sublayer 6a of PCx	3/301	0.373054	0.896405	0	0	1.3865	1.36713	LASP1;TMED9;PPT1
submammillothalamic nucleus	3/301	0.373054	0.896405	0	0	1.3865	1.36713	IL1RN;FCER1G;S100A6
substantia nigra reticulata, isthmic part	3/301	0.373054	0.896405	0	0	1.3865	1.36713	NRG4;LAPTM5;MMP9
substantia nigra reticulata, m1 part	3/301	0.373054	0.896405	0	0	1.3865	1.36713	NRG4;PABPC4;MMP9
superficial dorsofrontal area	3/301	0.373054	0.896405	0	0	1.3865	1.36713	PLAUR;FAU;OAZ1
superficial layers of TG	3/301	0.373054	0.896405	0	0	1.3865	1.36713	MMP14;GDF15;RPL27
superficial stratum of AOB	3/301	0.373054	0.896405	0	0	1.3865	1.36713	IL1RN;RAB31;IL1B
superficial stratum of JcPL	3/301	0.373054	0.896405	0	0	1.3865	1.36713	GDF15;RGS16;RPL37
superficial stratum of PCPD	3/301	0.373054	0.896405	0	0	1.3865	1.36713	PLAUR;FAU;OAZ1
superficial stratum of PO1	3/301	0.373054	0.896405	0	0	1.3865	1.36713	FCER1G;NRG4;S100A4
superficial stratum of SeStr	3/301	0.373054	0.896405	0	0	1.3865	1.36713	GRN;NRG4;GDF15
superficial stratum of TG	3/301	0.373054	0.896405	0	0	1.3865	1.36713	MMP14;GDF15;RPL27
superficial stratum of TTe	3/301	0.373054	0.896405	0	0	1.3865	1.36713	FCER1G;GDF15;S100A4
superficial stratum of isBI	3/301	0.373054	0.896405	0	0	1.3865	1.36713	NRG4;LAPTM5;MMP9
superficial stratum of m1AD	3/301	0.373054	0.896405	0	0	1.3865	1.36713	RPS8;RPL37A;RPS24
superficial stratum of r1BI	3/301	0.373054	0.896405	0	0	1.3865	1.36713	GRN;NRG4;LAPTM5
superficial stratum of r2Tr	3/301	0.373054	0.896405	0	0	1.3865	1.36713	CCL20;CFL1;SPP1
superficial stratum of r3BI	3/301	0.373054	0.896405	0	0	1.3865	1.36713	NRG4;SPP1;HLA-A
superficial stratum of r4BL	3/301	0.373054	0.896405	0	0	1.3865	1.36713	NRG4;SPP1;RPL37
superficial stratum of r5BL	3/301	0.373054	0.896405	0	0	1.3865	1.36713	NRG4;PABPC4;HLA-A
superficial stratum of r6BL	3/301	0.373054	0.896405	0	0	1.3865	1.36713	NRG4;MSN;HLA-A
superficial stratum of r6Lim	3/301	0.373054	0.896405	0	0	1.3865	1.36713	NRG4;MSN;HLA-A
superficial stratum of r7BL	3/301	0.373054	0.896405	0	0	1.3865	1.36713	NRG4;HLA-A;ZMPSTE24
superficial stratum of r7Lim	3/301	0.373054	0.896405	0	0	1.3865	1.36713	MSN;TAGLN2;HLA-A
superficial stratum of r9Ve	3/301	0.373054	0.896405	0	0	1.3865	1.36713	HMGA1;TAGLN2;PLIN2
superficial stratum of the Fc	3/301	0.373054	0.896405	0	0	1.3865	1.36713	MMP14;IL1B;ITGB2
terminal nucleus of the stria medullaris	3/301	0.373054	0.896405	0	0	1.3865	1.36713	SDC2;CANX;RPS21
upper dorsal lateral hypothalamic area	3/301	0.373054	0.896405	0	0	1.3865	1.36713	RAB31;LAPTM5;RPS21
ventral linear nucleus	3/301	0.373054	0.896405	0	0	1.3865	1.36713	IL1B;RGS16;IER3
ventral premammillary nucleus (migrated)	3/301	0.373054	0.896405	0	0	1.3865	1.36713	FCER1G;SDC2;MSN
ventrolateral part of VMH	3/301	0.373054	0.896405	0	0	1.3865	1.36713	FCER1G;RPS19;SDC2
zonal layer of SC	3/301	0.373054	0.896405	0	0	1.3865	1.36713	MMP14;GDF15;S100A6
Field CA2, stratum oriens	4/431	0.381074	0.896405	0	0	1.29075	1.24526	MMP14;YWHAB;SH3BGRL3;PFN1
Field CA3, stratum lacunosum-moleculare	4/432	0.382718	0.896405	0	0	1.28766	1.23675	MMP14;LAPTM5;SH3BGRL3;PFN1
Induseum griseum	4/435	0.387648	0.896405	0	0	1.2785	1.21158	MMP14;S100A4;HSPG2;DUSP6
Facial motor nucleus	3/330	0.429543	0.896405	0	0	1.26166	1.06615	NRG4;MSN;HLA-A
mantle zone of DG	5/599	0.439031	0.896405	0	0	1.15807	0.953306	TMED9;PABPC4;FAU;PFN1;RLF
Field CA3	3/336	0.441024	0.896405	0	0	1.23855	1.01395	TMED9;LAPTM5;PFN1
Field CA1	3/344	0.456195	0.896405	0	0	1.209	0.948863	YWHAB;PFN1;DUSP6
Field CA3, stratum oriens	3/349	0.465591	0.896405	0	0	1.19122	0.910626	TMED9;LAPTM5;PFN1
Accessory olfactory bulb	3/379	0.520377	0.896405	0	0	1.09449	0.714923	IL1RN;RAB31;IL1B
Laterodorsal tegmental nucleus	3/398	0.553482	0.896405	0	0	1.04083	0.615676	CD63;PLIN2;RPS12
Trochlear nucleus	3/405	0.565338	0.896405	0	0	1.02234	0.58307	RPL37A;MSN;RPS12
Field CA2	3/425	0.598144	0.896405	0	0	0.972882	0.499987	MMP14;ITGB2;PFN1
Septofimbrial nucleus	3/431	0.60767	0.896405	0	0	0.958948	0.477675	CD63;BTG1;ITGB2
Central amygdalar nucleus, capsular part	3/433	0.610812	0.896405	0	0	0.954389	0.470482	RPS19;IL1B;ACTG1
Fasciola cinerea	3/435	0.613937	0.896405	0	0	0.949873	0.463408	MMP14;IL1B;ITGB2
Taenia tecta	3/448	0.633844	0.896405	0	0	0.921507	0.420164	FCER1G;GDF15;S100A4
superficial stratum of DG	4/601	0.637575	0.896405	0	0	0.915119	0.41188	TMED9;PABPC4;PFN1;RLF
lateral posterior nucleus	4/602	0.638875	0.896405	0	0	0.913542	0.409309	RGS16;CANX;RPS27A;RPS21
AOB, mitral cell layer	2/301	0.644339	0.896405	0	0	0.914751	0.402061	IL1RN;IL1B
AOB, outer plexiform layer	2/301	0.644339	0.896405	0	0	0.914751	0.402061	IL1RN;IL1B
Accessory facial motor nucleus	2/301	0.644339	0.896405	0	0	0.914751	0.402061	LCP1;MMP9
Accessory olfactory bulb, glomerular layer	2/301	0.644339	0.896405	0	0	0.914751	0.402061	IL1RN;IL1B
Accessory olfactory bulb, mitral layer	2/301	0.644339	0.896405	0	0	0.914751	0.402061	IL1RN;IL1B
Agranular insular area, dorsal part	2/301	0.644339	0.896405	0	0	0.914751	0.402061	TYROBP;ACTN4
Agranular insular area, dorsal part, layer 1	2/301	0.644339	0.896405	0	0	0.914751	0.402061	LAPTM5;SH3BGRL3
Agranular insular area, dorsal part, layer 2/3	2/301	0.644339	0.896405	0	0	0.914751	0.402061	SH3BGRL3;ACTN4
Agranular insular area, dorsal part, layer 5	2/301	0.644339	0.896405	0	0	0.914751	0.402061	LASP1;TYROBP
Agranular insular area, ventral part, layer 1	2/301	0.644339	0.896405	0	0	0.914751	0.402061	TYROBP;S100A4
Agranular insular area, ventral part, layer 6a	2/301	0.644339	0.896405	0	0	0.914751	0.402061	TYROBP;IER3
Anterior amygdalar area	2/301	0.644339	0.896405	0	0	0.914751	0.402061	RPS19;IL1B
Anterior cingulate area	2/301	0.644339	0.896405	0	0	0.914751	0.402061	S100A6;DUSP6
Anterior cingulate area, dorsal part	2/301	0.644339	0.896405	0	0	0.914751	0.402061	S100A6;DUSP6
Anterior cingulate area, dorsal part, layer 5	2/301	0.644339	0.896405	0	0	0.914751	0.402061	TMED9;PPT1
Anterior cingulate area, dorsal part, layer 6a	2/301	0.644339	0.896405	0	0	0.914751	0.402061	TMED9;SH3BGRL3
Anterior cingulate area, ventral part	2/301	0.644339	0.896405	0	0	0.914751	0.402061	S100A6;DUSP6
Anterior cingulate area, ventral part, layer 1	2/301	0.644339	0.896405	0	0	0.914751	0.402061	S100A6;DUSP6
Anterior cingulate area, ventral part, layer 2/3	2/301	0.644339	0.896405	0	0	0.914751	0.402061	S100A6;DUSP6
Anterior group of the dorsal thalamus	2/301	0.644339	0.896405	0	0	0.914751	0.402061	RGS16;ITGB2
Anterior hypothalamic nucleus, anterior part	2/301	0.644339	0.896405	0	0	0.914751	0.402061	CANX;RPS21
Anterior hypothalamic nucleus, central part	2/301	0.644339	0.896405	0	0	0.914751	0.402061	CANX;RPS21
Anterior hypothalamic nucleus, posterior part	2/301	0.644339	0.896405	0	0	0.914751	0.402061	RPL31;CANX
Anterior olfactory nucleus	2/301	0.644339	0.896405	0	0	0.914751	0.402061	IL1RN;GDF15
Anterior olfactory nucleus, dorsal part	2/301	0.644339	0.896405	0	0	0.914751	0.402061	IL1RN;GDF15
Anterior olfactory nucleus, external part	2/301	0.644339	0.896405	0	0	0.914751	0.402061	IL1RN;GDF15
Anterior olfactory nucleus, lateral part	2/301	0.644339	0.896405	0	0	0.914751	0.402061	IL1RN;GDF15
Anterior olfactory nucleus, medial part	2/301	0.644339	0.896405	0	0	0.914751	0.402061	IL1RN;YBX1
Anterior olfactory nucleus, posteroventral part	2/301	0.644339	0.896405	0	0	0.914751	0.402061	PLAUR;YBX1
Anterior pretectal nucleus	2/301	0.644339	0.896405	0	0	0.914751	0.402061	RGS16;LAPTM5
Anterodorsal preoptic nucleus	2/301	0.644339	0.896405	0	0	0.914751	0.402061	RPL23;RPS12
Anterolateral visual area	2/301	0.644339	0.896405	0	0	0.914751	0.402061	PLAUR;DUSP6
Anterolateral visual area, layer 6a	2/301	0.644339	0.896405	0	0	0.914751	0.402061	YWHAB;PLAUR
Anteromedial visual area	2/301	0.644339	0.896405	0	0	0.914751	0.402061	CDKN1A;DUSP6
Anteromedial visual area, layer 2/3	2/301	0.644339	0.896405	0	0	0.914751	0.402061	CDKN1A;DUSP6
Basolateral amygdalar nucleus, ventral part	2/301	0.644339	0.896405	0	0	0.914751	0.402061	PLAUR;PLIN2
Bed nuclei of the stria terminalis, anterior division, anterolateral area	2/301	0.644339	0.896405	0	0	0.914751	0.402061	ACTN1;S100A6
Bed nuclei of the stria terminalis, anterior division, anteromedial area	2/301	0.644339	0.896405	0	0	0.914751	0.402061	S100A6;RPS21
Bed nuclei of the stria terminalis, anterior division, juxtacapsular nucleus	2/301	0.644339	0.896405	0	0	0.914751	0.402061	ACTN1;ZMPSTE24
Bed nuclei of the stria terminalis, anterior division, oval nucleus	2/301	0.644339	0.896405	0	0	0.914751	0.402061	ACTN1;S100A6
Bed nuclei of the stria terminalis, posterior division, principal nucleus	2/301	0.644339	0.896405	0	0	0.914751	0.402061	RPS3;RPS21
Caudoputamen	2/301	0.644339	0.896405	0	0	0.914751	0.402061	CAP1;ACTN1
Central amygdalar nucleus, medial part	2/301	0.644339	0.896405	0	0	0.914751	0.402061	RPS19;YWHAB
Central lateral nucleus of the thalamus	2/301	0.644339	0.896405	0	0	0.914751	0.402061	RGS16;IER3
Cerebral cortex	2/301	0.644339	0.896405	0	0	0.914751	0.402061	IL1RN;DUSP6
Cerebral nuclei	2/301	0.644339	0.896405	0	0	0.914751	0.402061	CAP1;ACTN1
Cerebrum	2/301	0.644339	0.896405	0	0	0.914751	0.402061	ACTN1;DUSP6
Cochlear nuclei	2/301	0.644339	0.896405	0	0	0.914751	0.402061	CCL20;LCP1
Copula pyramidis	2/301	0.644339	0.896405	0	0	0.914751	0.402061	BTG1;ITGB2
Copula pyramidis, granular layer	2/301	0.644339	0.896405	0	0	0.914751	0.402061	BTG1;ITGB2
Copula pyramidis, molecular layer	2/301	0.644339	0.896405	0	0	0.914751	0.402061	BTG1;ITGB2
Cortical plate	2/301	0.644339	0.896405	0	0	0.914751	0.402061	IL1RN;DUSP6
Cuneate nucleus	2/301	0.644339	0.896405	0	0	0.914751	0.402061	S100A6;PLIN2
Dentate gyrus, molecular layer	2/301	0.644339	0.896405	0	0	0.914751	0.402061	YWHAB;RLF
Dentate nucleus	2/301	0.644339	0.896405	0	0	0.914751	0.402061	CCL20;DBI
Diagonal band nucleus	2/301	0.644339	0.896405	0	0	0.914751	0.402061	PABPC4;IL1B
Dorsal column nuclei	2/301	0.644339	0.896405	0	0	0.914751	0.402061	S100A6;PLIN2
Dorsal peduncular area, layer 2/3	2/301	0.644339	0.896405	0	0	0.914751	0.402061	FCER1G;GDF15
Dorsal peduncular area, layer 5	2/301	0.644339	0.896405	0	0	0.914751	0.402061	YWHAB;GDF15
Dorsal peduncular area, layer 6a	2/301	0.644339	0.896405	0	0	0.914751	0.402061	GRN;S100A6
Ectorhinal area	2/301	0.644339	0.896405	0	0	0.914751	0.402061	PLIN2;RPS27A
Ectorhinal area/Layer 6a	2/301	0.644339	0.896405	0	0	0.914751	0.402061	PLAUR;PLIN2
Endopiriform nucleus	2/301	0.644339	0.896405	0	0	0.914751	0.402061	CAP1;TYROBP
Endopiriform nucleus, dorsal part	2/301	0.644339	0.896405	0	0	0.914751	0.402061	TYROBP;ACTN1
Endopiriform nucleus, ventral part	2/301	0.644339	0.896405	0	0	0.914751	0.402061	PLAUR;LCP1
Entorhinal area, lateral part, layer 6a	2/301	0.644339	0.896405	0	0	0.914751	0.402061	PLIN2;LCP1
Epithalamus	2/301	0.644339	0.896405	0	0	0.914751	0.402061	CD63;ITGB2
Field CA1, pyramidal layer	2/301	0.644339	0.896405	0	0	0.914751	0.402061	PFN1;DUSP6
Flocculus	2/301	0.644339	0.896405	0	0	0.914751	0.402061	BTG1;ITGB2
Flocculus, granular layer	2/301	0.644339	0.896405	0	0	0.914751	0.402061	BTG1;ITGB2
Frontal pole, layer 1	2/301	0.644339	0.896405	0	0	0.914751	0.402061	IL1RN;SH3BGRL3
Globus pallidus, external segment	2/301	0.644339	0.896405	0	0	0.914751	0.402061	RAB31;CCL20
Gustatory areas, layer 4	2/301	0.644339	0.896405	0	0	0.914751	0.402061	TYROBP;PLAUR
Hippocampal formation	2/301	0.644339	0.896405	0	0	0.914751	0.402061	PFN1;RLF
Hippocampal region	2/301	0.644339	0.896405	0	0	0.914751	0.402061	PFN1;RLF
Hypoglossal nucleus	2/301	0.644339	0.896405	0	0	0.914751	0.402061	MSN;TAGLN2
Infralimbic area, layer 2/3	2/301	0.644339	0.896405	0	0	0.914751	0.402061	FCER1G;S100A6
Infralimbic area, layer 6b	2/301	0.644339	0.896405	0	0	0.914751	0.402061	RPL5;S100A6
Interanterodorsal nucleus of the thalamus	2/301	0.644339	0.896405	0	0	0.914751	0.402061	SDC2;RGS16
Interanteromedial nucleus of the thalamus	2/301	0.644339	0.896405	0	0	0.914751	0.402061	RGS16;LAPTM5
Interbrain	2/301	0.644339	0.896405	0	0	0.914751	0.402061	RGS16;RPS21
Interposed nucleus	2/301	0.644339	0.896405	0	0	0.914751	0.402061	ITGB2;DBI
Koelliker-Fuse nucleus	2/301	0.644339	0.896405	0	0	0.914751	0.402061	CFL1;LAPTM5
Lateral amygdalar nucleus	2/301	0.644339	0.896405	0	0	0.914751	0.402061	IL1B;DBI
Lateral habenula	2/301	0.644339	0.896405	0	0	0.914751	0.402061	CD63;RGS16
Lateral reticular nucleus	2/301	0.644339	0.896405	0	0	0.914751	0.402061	NRG4;S100A4
Lateral reticular nucleus, magnocellular part	2/301	0.644339	0.896405	0	0	0.914751	0.402061	NRG4;S100A4
Lateral terminal nucleus of the accessory optic tract	2/301	0.644339	0.896405	0	0	0.914751	0.402061	CCL20;RPL11
Lateral visual area, layer 6a	2/301	0.644339	0.896405	0	0	0.914751	0.402061	CDKN1A;PLAUR
Lobule II	2/301	0.644339	0.896405	0	0	0.914751	0.402061	BTG1;DBI
Lobule II, granular layer	2/301	0.644339	0.896405	0	0	0.914751	0.402061	BTG1;DBI
Lobule II, molecular layer	2/301	0.644339	0.896405	0	0	0.914751	0.402061	BTG1;DBI
Locus ceruleus	2/301	0.644339	0.896405	0	0	0.914751	0.402061	PRDX1;PLIN2
Medial amygdalar nucleus, posteroventral part	2/301	0.644339	0.896405	0	0	0.914751	0.402061	IL1B;LAPTM5
Medial geniculate complex	2/301	0.644339	0.896405	0	0	0.914751	0.402061	RGS16;RPL11
Medial geniculate complex, ventral part	2/301	0.644339	0.896405	0	0	0.914751	0.402061	RGS16;RPL11
Medial habenula	2/301	0.644339	0.896405	0	0	0.914751	0.402061	CD63;ITGB2
Mus musculus	2/301	0.644339	0.896405	0	0	0.914751	0.402061	BTG1;DUSP6
Nodulus (X)	2/301	0.644339	0.896405	0	0	0.914751	0.402061	CD63;ITGB2
Nucleus accumbens	2/301	0.644339	0.896405	0	0	0.914751	0.402061	CAP1;ACTN1
Nucleus of Roller	2/301	0.644339	0.896405	0	0	0.914751	0.402061	MSN;FAU
Nucleus of reunions	2/301	0.644339	0.896405	0	0	0.914751	0.402061	RGS16;LAPTM5
Nucleus of the brachium of the inferior colliculus	2/301	0.644339	0.896405	0	0	0.914751	0.402061	GRN;CCL20
Nucleus of the lateral lemniscus, horizontal part	2/301	0.644339	0.896405	0	0	0.914751	0.402061	IL1RN;PLIN2
Nucleus of the solitary tract	2/301	0.644339	0.896405	0	0	0.914751	0.402061	TAGLN2;PLIN2
Nucleus of the solitary tract, medial part	2/301	0.644339	0.896405	0	0	0.914751	0.402061	TAGLN2;PLIN2
Nucleus prepositus	2/301	0.644339	0.896405	0	0	0.914751	0.402061	ITGB2;RPL37
OB mitral cell layer	2/301	0.644339	0.896405	0	0	0.914751	0.402061	IL1RN;CDKN1A
Orbital area, ventrolateral part, layer 1	2/301	0.644339	0.896405	0	0	0.914751	0.402061	IL1RN;GDF15
Pallidum, dorsal region	2/301	0.644339	0.896405	0	0	0.914751	0.402061	RAB31;CCL20
Parabrachial nucleus	2/301	0.644339	0.896405	0	0	0.914751	0.402061	RPS18;PRDX1
Parabrachial nucleus, lateral division	2/301	0.644339	0.896405	0	0	0.914751	0.402061	RPS18;PRDX1
Parabrachial nucleus, lateral division, external lateral part	2/301	0.644339	0.896405	0	0	0.914751	0.402061	RPS18;PRDX1
Paraflocculus	2/301	0.644339	0.896405	0	0	0.914751	0.402061	BTG1;LCP1
Paraflocculus, molecular layer	2/301	0.644339	0.896405	0	0	0.914751	0.402061	BTG1;LCP1
Paragigantocellular reticular nucleus	2/301	0.644339	0.896405	0	0	0.914751	0.402061	NRG4;HLA-A
Paragigantocellular reticular nucleus, lateral part	2/301	0.644339	0.896405	0	0	0.914751	0.402061	NRG4;HLA-A
Parasubiculum, layer 1	2/301	0.644339	0.896405	0	0	0.914751	0.402061	GDF15;B2M
PcPL part of the periaqueductal gray	2/301	0.644339	0.896405	0	0	0.914751	0.402061	CD63;SDC2
PcPV part of the periaqueductal gray	2/301	0.644339	0.896405	0	0	0.914751	0.402061	RPL27A;ATP5G3
Perihypoglossal nuclei	2/301	0.644339	0.896405	0	0	0.914751	0.402061	ITGB2;RPL37
Piriform-amygdalar area	2/301	0.644339	0.896405	0	0	0.914751	0.402061	TYROBP;PLIN2
Pons	2/301	0.644339	0.896405	0	0	0.914751	0.402061	SPP1;HSPG2
Pons, motor related	2/301	0.644339	0.896405	0	0	0.914751	0.402061	HMGA1;SPP1
Pons, sensory related	2/301	0.644339	0.896405	0	0	0.914751	0.402061	PRDX1;SPP1
Pontine reticular nucleus, caudal part	2/301	0.644339	0.896405	0	0	0.914751	0.402061	SPP1;HSPG2
Posterior complex of the thalamus	2/301	0.644339	0.896405	0	0	0.914751	0.402061	RGS16;IER3
Posterior parietal association areas, layer 1	2/301	0.644339	0.896405	0	0	0.914751	0.402061	CDKN1A;DUSP6
Posterolateral visual area, layer 1	2/301	0.644339	0.896405	0	0	0.914751	0.402061	PLIN2;DUSP6
Posterolateral visual area, layer 6a	2/301	0.644339	0.896405	0	0	0.914751	0.402061	CDKN1A;PLAUR
Postsubiculum	2/301	0.644339	0.896405	0	0	0.914751	0.402061	GDF15;S100A6
Postsubiculum, layer 3	2/301	0.644339	0.896405	0	0	0.914751	0.402061	CAP1;CDKN1A
Precommissural nucleus	2/301	0.644339	0.896405	0	0	0.914751	0.402061	CD63;SDC2
Prelimbic area, layer 2	2/301	0.644339	0.896405	0	0	0.914751	0.402061	IL1RN;PPT1
Prelimbic area, layer 2/3	2/301	0.644339	0.896405	0	0	0.914751	0.402061	IL1RN;S100A6
Pretectal region	2/301	0.644339	0.896405	0	0	0.914751	0.402061	RGS16;LAPTM5
Primary motor area	2/301	0.644339	0.896405	0	0	0.914751	0.402061	TYROBP;SH3BGRL3
Primary motor area, Layer 5	2/301	0.644339	0.896405	0	0	0.914751	0.402061	TMED9;SH3BGRL3
Primary motor area, Layer 6a	2/301	0.644339	0.896405	0	0	0.914751	0.402061	TMED9;TYROBP
Primary somatosensory area, barrel field, layer 4	2/301	0.644339	0.896405	0	0	0.914751	0.402061	LASP1;B2M
Primary somatosensory area, barrel field, layer 5	2/301	0.644339	0.896405	0	0	0.914751	0.402061	LASP1;PPT1
Primary somatosensory area, lower limb, layer 4	2/301	0.644339	0.896405	0	0	0.914751	0.402061	CCL20;RPL27
Primary somatosensory area, lower limb, layer 5	2/301	0.644339	0.896405	0	0	0.914751	0.402061	TMED9;SH3BGRL3
Primary somatosensory area, trunk, layer 6a	2/301	0.644339	0.896405	0	0	0.914751	0.402061	LASP1;PPT1
Primary somatosensory area, trunk, layer 6b	2/301	0.644339	0.896405	0	0	0.914751	0.402061	LASP1;PPT1
Primary somatosensory area, unassigned	2/301	0.644339	0.896405	0	0	0.914751	0.402061	PLAUR;ACTN4
Primary somatosensory area, unassigned, layer 5	2/301	0.644339	0.896405	0	0	0.914751	0.402061	LASP1;TYROBP
Primary somatosensory area, unassigned, layer 6b	2/301	0.644339	0.896405	0	0	0.914751	0.402061	IL1RN;PLAUR
Primary somatosensory area, upper limb, layer 5	2/301	0.644339	0.896405	0	0	0.914751	0.402061	LASP1;B2M
Primary somatosensory area, upper limb, layer 6a	2/301	0.644339	0.896405	0	0	0.914751	0.402061	LASP1;PPT1
Primary visual area, layer 1	2/301	0.644339	0.896405	0	0	0.914751	0.402061	DUSP6;MCL1
Primary visual area, layer 2/3	2/301	0.644339	0.896405	0	0	0.914751	0.402061	DUSP6;MCL1
Reticular nucleus of the thalamus	2/301	0.644339	0.896405	0	0	0.914751	0.402061	RAB31;RGS16
Retrosplenial area, dorsal part	2/301	0.644339	0.896405	0	0	0.914751	0.402061	S100A4;DUSP6
Retrosplenial area, dorsal part, layer 5	2/301	0.644339	0.896405	0	0	0.914751	0.402061	CDKN1A;DUSP6
Retrosplenial area, dorsal part, layer 6b	2/301	0.644339	0.896405	0	0	0.914751	0.402061	CDKN1A;TUBA1B
Retrosplenial area, lateral agranular part, layer 2/3	2/301	0.644339	0.896405	0	0	0.914751	0.402061	CDKN1A;DUSP6
Retrosplenial area, ventral part, layer 2	2/301	0.644339	0.896405	0	0	0.914751	0.402061	MMP14;IL1B
Retrosplenial area, ventral part, layer 2/3	2/301	0.644339	0.896405	0	0	0.914751	0.402061	MMP14;IL1B
Secondary motor area	2/301	0.644339	0.896405	0	0	0.914751	0.402061	TYROBP;SH3BGRL3
Somatomotor areas	2/301	0.644339	0.896405	0	0	0.914751	0.402061	TYROBP;SH3BGRL3
Striatum	2/301	0.644339	0.896405	0	0	0.914751	0.402061	CAP1;ACTN1
Striatum dorsal region	2/301	0.644339	0.896405	0	0	0.914751	0.402061	CAP1;ACTN1
Subiculum, dorsal part	2/301	0.644339	0.896405	0	0	0.914751	0.402061	PFN1;DUSP6
Subiculum, dorsal part, molecular layer	2/301	0.644339	0.896405	0	0	0.914751	0.402061	BTG1;RLF
Subiculum, dorsal part, pyramidal layer	2/301	0.644339	0.896405	0	0	0.914751	0.402061	PFN1;DUSP6
Subiculum, dorsal part, stratum radiatum	2/301	0.644339	0.896405	0	0	0.914751	0.402061	ITGB2;PFN1
Sublaterodorsal nucleus	2/301	0.644339	0.896405	0	0	0.914751	0.402061	PLIN2;FAU
Superior colliculus, motor related, intermediate gray layer, sublayer a	2/301	0.644339	0.896405	0	0	0.914751	0.402061	LAPTM5;RPL27
Taenia tecta, dorsal part, layer 2	2/301	0.644339	0.896405	0	0	0.914751	0.402061	FCER1G;GDF15
Taenia tecta, ventral part, layer 2	2/301	0.644339	0.896405	0	0	0.914751	0.402061	GDF15;FTH1
Tegmental reticular nucleus	2/301	0.644339	0.896405	0	0	0.914751	0.402061	GRN;SPP1
Triangular nucleus of septum	2/301	0.644339	0.896405	0	0	0.914751	0.402061	BTG1;ITGB2
Tuberomammillary nucleus	2/301	0.644339	0.896405	0	0	0.914751	0.402061	S100A6;TIMP1
Uvula (IX)	2/301	0.644339	0.896405	0	0	0.914751	0.402061	BTG1;PLIN2
Uvula (IX), granular layer	2/301	0.644339	0.896405	0	0	0.914751	0.402061	BTG1;PLIN2
Uvula (IX), molecular layer	2/301	0.644339	0.896405	0	0	0.914751	0.402061	BTG1;PLIN2
Ventral anterior-lateral complex of the thalamus	2/301	0.644339	0.896405	0	0	0.914751	0.402061	IL1B;RGS16
Ventral cochlear nucleus	2/301	0.644339	0.896405	0	0	0.914751	0.402061	CCL20;PLIN2
Ventral group of the dorsal thalamus	2/301	0.644339	0.896405	0	0	0.914751	0.402061	IL1B;RGS16
Ventral medial nucleus of the thalamus	2/301	0.644339	0.896405	0	0	0.914751	0.402061	RGS16;RPL27
Ventral posterolateral nucleus of the thalamus	2/301	0.644339	0.896405	0	0	0.914751	0.402061	RAB31;RGS16
Ventral posteromedial nucleus of the thalamus, parvicellular part	2/301	0.644339	0.896405	0	0	0.914751	0.402061	IL1B;RGS16
Ventromedial hypothalamic nucleus, ventrolateral part	2/301	0.644339	0.896405	0	0	0.914751	0.402061	FCER1G;SDC2
Visual areas	2/301	0.644339	0.896405	0	0	0.914751	0.402061	CDKN1A;DUSP6
accumbens nucleus, core domain	2/301	0.644339	0.896405	0	0	0.914751	0.402061	ACTN1;PHLDA1
accumbens nucleus, shell domain	2/301	0.644339	0.896405	0	0	0.914751	0.402061	YBX1;PHLDA1
alar plate of evaginated telencephalic vesicle	2/301	0.644339	0.896405	0	0	0.914751	0.402061	ACTN1;DUSP6
alar plate of m1	2/301	0.644339	0.896405	0	0	0.914751	0.402061	S100A6;RPL27
alar plate of p1	2/301	0.644339	0.896405	0	0	0.914751	0.402061	RGS16;LAPTM5
alar plate of p3 (alar prethalamus)	2/301	0.644339	0.896405	0	0	0.914751	0.402061	RAB31;RGS16
anterior olfactory area, dorsal part	2/301	0.644339	0.896405	0	0	0.914751	0.402061	IL1RN;GDF15
anterior olfactory area, ventral part	2/301	0.644339	0.896405	0	0	0.914751	0.402061	IL1RN;YBX1
anterior pretectal nucleus, dorsal superficial part	2/301	0.644339	0.896405	0	0	0.914751	0.402061	RGS16;LAPTM5
anterior pretectal nucleus, ventral superficial part	2/301	0.644339	0.896405	0	0	0.914751	0.402061	RGS16;ITGB2
basal plate of m1	2/301	0.644339	0.896405	0	0	0.914751	0.402061	SDC2;SPP1
basolateral amygdaloid nucleus, ventral part	2/301	0.644339	0.896405	0	0	0.914751	0.402061	PLAUR;LCP1
bed nucleus of the stria terminalis, laterocentral division	2/301	0.644339	0.896405	0	0	0.914751	0.402061	ACTN1;S100A6
bed nucleus of the stria terminalis, medioseptal division	2/301	0.644339	0.896405	0	0	0.914751	0.402061	S100A6;RPS21
caudal linear (raphe) nucleus	2/301	0.644339	0.896405	0	0	0.914751	0.402061	FTH1;SDC2
caudal secondary prosencephalon	2/301	0.644339	0.896405	0	0	0.914751	0.402061	ACTN1;DUSP6
caudate nucleus	2/301	0.644339	0.896405	0	0	0.914751	0.402061	RAB31;ACTN1
central lateral nucleus	2/301	0.644339	0.896405	0	0	0.914751	0.402061	RGS16;IER3
central subpallium (classic basal ganglia)	2/301	0.644339	0.896405	0	0	0.914751	0.402061	CAP1;ACTN1
centromedian nucleus	2/301	0.644339	0.896405	0	0	0.914751	0.402061	RGS16;LAPTM5
cerebellar nuclei of CbH	2/301	0.644339	0.896405	0	0	0.914751	0.402061	ITGB2;DBI
collicular (rostral) midbrain tectum	2/301	0.644339	0.896405	0	0	0.914751	0.402061	S100A6;RPL27
commissural pretectal domain	2/301	0.644339	0.896405	0	0	0.914751	0.402061	LAPTM5;RPL27
core part of DTg	2/301	0.644339	0.896405	0	0	0.914751	0.402061	RPS6;RPL37A
dorsal entopeduncular nucleus	2/301	0.644339	0.896405	0	0	0.914751	0.402061	RAB31;RPS21
dorsal juxtacommissural pretectal nucleus	2/301	0.644339	0.896405	0	0	0.914751	0.402061	SDC2;DBI
dorsal nucleus of the lateral lemniscus	2/301	0.644339	0.896405	0	0	0.914751	0.402061	CFL1;S100A6
dorsal part of JcP	2/301	0.644339	0.896405	0	0	0.914751	0.402061	SDC2;DBI
dorsal part of THyB	2/301	0.644339	0.896405	0	0	0.914751	0.402061	SDC2;RPS12
dorsolateral SC part of the periaqueductal gray	2/301	0.644339	0.896405	0	0	0.914751	0.402061	RPS8;HMGA1
dorsolateral part of Med	2/301	0.644339	0.896405	0	0	0.914751	0.402061	BTG1;S100A4
dorsolateral part of m1A	2/301	0.644339	0.896405	0	0	0.914751	0.402061	S100A6;RPL27
dorsolateral part of m2A	2/301	0.644339	0.896405	0	0	0.914751	0.402061	S100A6;TAGLN2
episupraoptic nucleus	2/301	0.644339	0.896405	0	0	0.914751	0.402061	IL1B;S100A6
external cortical nucleus of inferior colliculus	2/301	0.644339	0.896405	0	0	0.914751	0.402061	S100A6;PLIN2
external globus pallidum	2/301	0.644339	0.896405	0	0	0.914751	0.402061	RAB31;ACTN1
hippocampus (cortex Ammonis)	2/301	0.644339	0.896405	0	0	0.914751	0.402061	LAPTM5;PFN1
horizontal nucleus of the diagonal band	2/301	0.644339	0.896405	0	0	0.914751	0.402061	PABPC4;TIMP1
horizontal nucleus of the diagonal band, transitional part	2/301	0.644339	0.896405	0	0	0.914751	0.402061	NRG4;TIMP1
interanterodorsal nucleus	2/301	0.644339	0.896405	0	0	0.914751	0.402061	SDC2;RGS16
intermediate gray layer of SC	2/301	0.644339	0.896405	0	0	0.914751	0.402061	S100A6;RPL27
intermediate isthmic part of the dorsal raphe nucleus	2/301	0.644339	0.896405	0	0	0.914751	0.402061	RPS6;RPL37A
intermediate part of r10B	2/301	0.644339	0.896405	0	0	0.914751	0.402061	HMGA1;MSN
intermediate stratum of 5BL	2/301	0.644339	0.896405	0	0	0.914751	0.402061	SPP1;MMP9
intermediate stratum of AOB	2/301	0.644339	0.896405	0	0	0.914751	0.402061	IL1RN;IL1B
intermediate stratum of CbH	2/301	0.644339	0.896405	0	0	0.914751	0.402061	ITGB2;DBI
intermediate stratum of CoPL	2/301	0.644339	0.896405	0	0	0.914751	0.402061	LAPTM5;RPL27
intermediate stratum of Ist	2/301	0.644339	0.896405	0	0	0.914751	0.402061	CFL1;S100A6
intermediate stratum of JcPD	2/301	0.644339	0.896405	0	0	0.914751	0.402061	SDC2;DBI
intermediate stratum of JcPL	2/301	0.644339	0.896405	0	0	0.914751	0.402061	RGS16;LAPTM5
intermediate stratum of POH	2/301	0.644339	0.896405	0	0	0.914751	0.402061	RGS16;RPS21
intermediate stratum of RtC	2/301	0.644339	0.896405	0	0	0.914751	0.402061	RAB31;RGS16
intermediate stratum of SC	2/301	0.644339	0.896405	0	0	0.914751	0.402061	S100A6;RPL27
intermediate stratum of SePal	2/301	0.644339	0.896405	0	0	0.914751	0.402061	ACTN1;PHLDA1
intermediate stratum of SeStr	2/301	0.644339	0.896405	0	0	0.914751	0.402061	YBX1;PHLDA1
intermediate stratum of Str	2/301	0.644339	0.896405	0	0	0.914751	0.402061	CAP1;ACTN1
intermediate stratum of TPaA	2/301	0.644339	0.896405	0	0	0.914751	0.402061	CANX;RPS21
intermediate stratum of VPrP	2/301	0.644339	0.896405	0	0	0.914751	0.402061	TYROBP;ACTN1
intermediate stratum of VTTh	2/301	0.644339	0.896405	0	0	0.914751	0.402061	RGS16;IER3
intermediate stratum of m1AD	2/301	0.644339	0.896405	0	0	0.914751	0.402061	RPL27A;RPL37A
intermediate stratum of m1AL	2/301	0.644339	0.896405	0	0	0.914751	0.402061	GRN;S100A6
intermediate stratum of m2Lim	2/301	0.644339	0.896405	0	0	0.914751	0.402061	ITGB2;TIMP1
intermediate stratum of r10BI	2/301	0.644339	0.896405	0	0	0.914751	0.402061	HMGA1;S100A4
intermediate stratum of r2BI	2/301	0.644339	0.896405	0	0	0.914751	0.402061	HMGA1;SPP1
intermediate stratum of r2BM	2/301	0.644339	0.896405	0	0	0.914751	0.402061	HMGA1;SPP1
intermediate stratum of r2Lim	2/301	0.644339	0.896405	0	0	0.914751	0.402061	MSN;LCP1
intermediate stratum of r2Tr	2/301	0.644339	0.896405	0	0	0.914751	0.402061	SPP1;MSN
intermediate stratum of r3BM	2/301	0.644339	0.896405	0	0	0.914751	0.402061	HMGA1;SPP1
intermediate stratum of r4BL	2/301	0.644339	0.896405	0	0	0.914751	0.402061	SPP1;MMP9
intermediate stratum of r4BM	2/301	0.644339	0.896405	0	0	0.914751	0.402061	SPP1;ZMPSTE24
intermediate stratum of r4Lim	2/301	0.644339	0.896405	0	0	0.914751	0.402061	PRDX1;MMP9
intermediate stratum of r5BM	2/301	0.644339	0.896405	0	0	0.914751	0.402061	SPP1;HSPG2
intermediate stratum of r5Lim	2/301	0.644339	0.896405	0	0	0.914751	0.402061	SPP1;MMP9
intermediate stratum of r7BL	2/301	0.644339	0.896405	0	0	0.914751	0.402061	NRG4;ZMPSTE24
intermediate stratum of r8BL	2/301	0.644339	0.896405	0	0	0.914751	0.402061	NRG4;HLA-A
intermediate tier of thalamus	2/301	0.644339	0.896405	0	0	0.914751	0.402061	RGS16;S100A4
intermedioposterior nucleus	2/301	0.644339	0.896405	0	0	0.914751	0.402061	RGS16;S100A4
internal globus pallidus	2/301	0.644339	0.896405	0	0	0.914751	0.402061	RAB31;CCL20
interstitial nucleus of the posterior limb of the anterior commissure	2/301	0.644339	0.896405	0	0	0.914751	0.402061	IL1B;ACTG1
island of Calleja major	2/301	0.644339	0.896405	0	0	0.914751	0.402061	ACTN1;PHLDA1
isthmic liminal reticular area	2/301	0.644339	0.896405	0	0	0.914751	0.402061	RPS18;RPS6
isthmic part of mesencephalic trigeminal nucleus	2/301	0.644339	0.896405	0	0	0.914751	0.402061	RPS18;MSN
isthmic part of the periaqueductal gray	2/301	0.644339	0.896405	0	0	0.914751	0.402061	RPS18;RPL37
lateral IC periaqueductal gray	2/301	0.644339	0.896405	0	0	0.914751	0.402061	RPS8;HMGA1
lateral SC part of the periaqueductal gray	2/301	0.644339	0.896405	0	0	0.914751	0.402061	RPS8;HMGA1
lateral part of CoP	2/301	0.644339	0.896405	0	0	0.914751	0.402061	LAPTM5;RPL27
lateral part of JcP	2/301	0.644339	0.896405	0	0	0.914751	0.402061	RGS16;LAPTM5
lateral part of PcP	2/301	0.644339	0.896405	0	0	0.914751	0.402061	RGS16;LAPTM5
lateral part of alar p3	2/301	0.644339	0.896405	0	0	0.914751	0.402061	RAB31;RGS16
lateral part of r3B	2/301	0.644339	0.896405	0	0	0.914751	0.402061	NRG4;SPP1
lateral part of r4B	2/301	0.644339	0.896405	0	0	0.914751	0.402061	SPP1;MMP9
lateral part of r7B	2/301	0.644339	0.896405	0	0	0.914751	0.402061	NRG4;ZMPSTE24
lateral part of r8B	2/301	0.644339	0.896405	0	0	0.914751	0.402061	NRG4;HLA-A
lateral part of the lateral habenular nucleus	2/301	0.644339	0.896405	0	0	0.914751	0.402061	CD63;ITGB2
lateral preoptic area, PO1 part	2/301	0.644339	0.896405	0	0	0.914751	0.402061	NRG4;RPS21
lateral septal nucleus, dorsal part	2/301	0.644339	0.896405	0	0	0.914751	0.402061	DBI;B2M
lateral spiriform nucleus	2/301	0.644339	0.896405	0	0	0.914751	0.402061	SDC2;PFDN5
lateral subhabenular nucleus	2/301	0.644339	0.896405	0	0	0.914751	0.402061	SDC2;RGS16
lateral terminal nucleus of the accessory optic tract, lateral part	2/301	0.644339	0.896405	0	0	0.914751	0.402061	GDF15;LAPTM5
lateropallial amygdalopiriform area	2/301	0.644339	0.896405	0	0	0.914751	0.402061	YWHAB;LCP1
laterostriatal stripe	2/301	0.644339	0.896405	0	0	0.914751	0.402061	CAP1;ACTN1
layer 1 of CCx	2/301	0.644339	0.896405	0	0	0.914751	0.402061	MMP14;GDF15
layer 1 of FCx	2/301	0.644339	0.896405	0	0	0.914751	0.402061	IL1RN;LAPTM5
layer 1 of InsCx	2/301	0.644339	0.896405	0	0	0.914751	0.402061	PLAUR;LAPTM5
layer 1 of LPrP cortex	2/301	0.644339	0.896405	0	0	0.914751	0.402061	TYROBP;LAPTM5
layer 2 of AOD cortex	2/301	0.644339	0.896405	0	0	0.914751	0.402061	IL1RN;GDF15
layer 2 of AOV cortex	2/301	0.644339	0.896405	0	0	0.914751	0.402061	IL1RN;YBX1
layer 2 of CCx	2/301	0.644339	0.896405	0	0	0.914751	0.402061	MMP14;GDF15
layer 2 of FCx	2/301	0.644339	0.896405	0	0	0.914751	0.402061	IL1RN;LAPTM5
layer 2 of InsCx	2/301	0.644339	0.896405	0	0	0.914751	0.402061	PLAUR;LAPTM5
layer 2 of OCx	2/301	0.644339	0.896405	0	0	0.914751	0.402061	CDKN1A;DUSP6
layer 2 of PRh-Ect	2/301	0.644339	0.896405	0	0	0.914751	0.402061	PLAUR;RPS27A
layer 3 of AOV cortex	2/301	0.644339	0.896405	0	0	0.914751	0.402061	IL1RN;DUSP6
layer 3 of FCx	2/301	0.644339	0.896405	0	0	0.914751	0.402061	IL1RN;SH3BGRL3
layer 4 of FCx	2/301	0.644339	0.896405	0	0	0.914751	0.402061	TYROBP;SH3BGRL3
layer 4 of InsCx	2/301	0.644339	0.896405	0	0	0.914751	0.402061	LASP1;ACTN4
layer 4 of PRh-Ect	2/301	0.644339	0.896405	0	0	0.914751	0.402061	MYL6;PLAUR
layer 5 of CCx	2/301	0.644339	0.896405	0	0	0.914751	0.402061	TMED9;PPT1
layer 6 of ERCx	2/301	0.644339	0.896405	0	0	0.914751	0.402061	PLIN2;LCP1
layer 6 of PaS	2/301	0.644339	0.896405	0	0	0.914751	0.402061	CAP1;CDKN1A
layer 6a of PaS	2/301	0.644339	0.896405	0	0	0.914751	0.402061	CAP1;CCL20
layer 6b of PaS	2/301	0.644339	0.896405	0	0	0.914751	0.402061	CAP1;CDKN1A
liminal part of r2 alar plate	2/301	0.644339	0.896405	0	0	0.914751	0.402061	MSN;LCP1
liminal reticular formation of m2	2/301	0.644339	0.896405	0	0	0.914751	0.402061	GRN;ITGB2
m1 (rostral) midbrain tegmentum	2/301	0.644339	0.896405	0	0	0.914751	0.402061	SDC2;SPP1
m1 part of paranigral nucleus	2/301	0.644339	0.896405	0	0	0.914751	0.402061	GRN;SDC2
m2 part of substantia nigra compacta	2/301	0.644339	0.896405	0	0	0.914751	0.402061	NRG4;SDC2
magnocellular interstitial nucleus of the posterior commissure	2/301	0.644339	0.896405	0	0	0.914751	0.402061	ATP5G3;PFDN5
mantle zone of AOD	2/301	0.644339	0.896405	0	0	0.914751	0.402061	IL1RN;GDF15
mantle zone of AOV	2/301	0.644339	0.896405	0	0	0.914751	0.402061	IL1RN;YBX1
mantle zone of APal	2/301	0.644339	0.896405	0	0	0.914751	0.402061	CD63;DBI
mantle zone of CA	2/301	0.644339	0.896405	0	0	0.914751	0.402061	LAPTM5;PFN1
mantle zone of CoPL	2/301	0.644339	0.896405	0	0	0.914751	0.402061	LAPTM5;RPL27
mantle zone of CoPV	2/301	0.644339	0.896405	0	0	0.914751	0.402061	RPL27A;ATP5G3
mantle zone of ITTh	2/301	0.644339	0.896405	0	0	0.914751	0.402061	RGS16;S100A4
mantle zone of JcPD	2/301	0.644339	0.896405	0	0	0.914751	0.402061	SDC2;DBI
mantle zone of JcPL	2/301	0.644339	0.896405	0	0	0.914751	0.402061	RGS16;LAPTM5
mantle zone of OCx	2/301	0.644339	0.896405	0	0	0.914751	0.402061	CDKN1A;DUSP6
mantle zone of PHyB-V	2/301	0.644339	0.896405	0	0	0.914751	0.402061	SDC2;TIMP1
mantle zone of POH	2/301	0.644339	0.896405	0	0	0.914751	0.402061	RGS16;RPS21
mantle zone of PcPL	2/301	0.644339	0.896405	0	0	0.914751	0.402061	RGS16;LAPTM5
mantle zone of RtC	2/301	0.644339	0.896405	0	0	0.914751	0.402061	RAB31;RGS16
mantle zone of SeDg	2/301	0.644339	0.896405	0	0	0.914751	0.402061	NRG4;RPS21
mantle zone of SeStr	2/301	0.644339	0.896405	0	0	0.914751	0.402061	ACTN1;PHLDA1
mantle zone of Str	2/301	0.644339	0.896405	0	0	0.914751	0.402061	CAP1;ACTN1
mantle zone of TG	2/301	0.644339	0.896405	0	0	0.914751	0.402061	GDF15;RPL27
mantle zone of THyB-D	2/301	0.644339	0.896405	0	0	0.914751	0.402061	SDC2;RPS12
mantle zone of TPaA	2/301	0.644339	0.896405	0	0	0.914751	0.402061	RGS16;RPS21
mantle zone of TTe	2/301	0.644339	0.896405	0	0	0.914751	0.402061	FCER1G;GDF15
mantle zone of isBL	2/301	0.644339	0.896405	0	0	0.914751	0.402061	RPS18;RPS6
mantle zone of isBM	2/301	0.644339	0.896405	0	0	0.914751	0.402061	SDC2;RPL37A
mantle zone of m1B	2/301	0.644339	0.896405	0	0	0.914751	0.402061	SDC2;SPP1
mantle zone of m2ADL	2/301	0.644339	0.896405	0	0	0.914751	0.402061	S100A6;TAGLN2
mantle zone of p2B	2/301	0.644339	0.896405	0	0	0.914751	0.402061	SDC2;RGS16
mantle zone of p2ZL	2/301	0.644339	0.896405	0	0	0.914751	0.402061	RGS16;RPL27
mantle zone of p3B	2/301	0.644339	0.896405	0	0	0.914751	0.402061	SDC2;IL1B
mantle zone of p3ZL	2/301	0.644339	0.896405	0	0	0.914751	0.402061	RAB31;RGS16
mantle zone of r10BI	2/301	0.644339	0.896405	0	0	0.914751	0.402061	HMGA1;MSN
mantle zone of r10Tr	2/301	0.644339	0.896405	0	0	0.914751	0.402061	TAGLN2;PLIN2
mantle zone of r10Ve	2/301	0.644339	0.896405	0	0	0.914751	0.402061	GDF15;PLIN2
mantle zone of r1Tr	2/301	0.644339	0.896405	0	0	0.914751	0.402061	RPS18;SPP1
mantle zone of r2Co	2/301	0.644339	0.896405	0	0	0.914751	0.402061	BTG1;LCP1
mantle zone of r2Lim	2/301	0.644339	0.896405	0	0	0.914751	0.402061	MSN;LCP1
mantle zone of r3BL	2/301	0.644339	0.896405	0	0	0.914751	0.402061	NRG4;SPP1
mantle zone of r4BI	2/301	0.644339	0.896405	0	0	0.914751	0.402061	SPP1;MMP9
mantle zone of r4BL	2/301	0.644339	0.896405	0	0	0.914751	0.402061	SPP1;MMP9
mantle zone of r4BM	2/301	0.644339	0.896405	0	0	0.914751	0.402061	SLC20A1;SPP1
mantle zone of r5BM	2/301	0.644339	0.896405	0	0	0.914751	0.402061	SPP1;HSPG2
mantle zone of r7BL	2/301	0.644339	0.896405	0	0	0.914751	0.402061	NRG4;ZMPSTE24
mantle zone of r8BL	2/301	0.644339	0.896405	0	0	0.914751	0.402061	NRG4;HLA-A
mantle zone of r9Ve	2/301	0.644339	0.896405	0	0	0.914751	0.402061	TAGLN2;PLIN2
mantle zone of the IG	2/301	0.644339	0.896405	0	0	0.914751	0.402061	S100A4;HSPG2
medial geniculate nucleus	2/301	0.644339	0.896405	0	0	0.914751	0.402061	RGS16;RPL11
medial part of r4B	2/301	0.644339	0.896405	0	0	0.914751	0.402061	SLC20A1;SPP1
medial part of r5B	2/301	0.644339	0.896405	0	0	0.914751	0.402061	SPP1;HSPG2
medial part of the isB	2/301	0.644339	0.896405	0	0	0.914751	0.402061	SDC2;RPL37A
medial part of the lateral habenular nucleus	2/301	0.644339	0.896405	0	0	0.914751	0.402061	CD63;RGS16
medial subhabenular nucleus	2/301	0.644339	0.896405	0	0	0.914751	0.402061	CD63;ITGB2
medial trapezoid nucleus	2/301	0.644339	0.896405	0	0	0.914751	0.402061	FCER1G;HSPG2
mesomere 1	2/301	0.644339	0.896405	0	0	0.914751	0.402061	S100A6;RPL27
navicular nucleus	2/301	0.644339	0.896405	0	0	0.914751	0.402061	GDF15;FTH1
neural plate	2/301	0.644339	0.896405	0	0	0.914751	0.402061	BTG1;DUSP6
neuropeptide-S nucleus	2/301	0.644339	0.896405	0	0	0.914751	0.402061	PLIN2;RPS27A
nucleus of the central acoustic tract	2/301	0.644339	0.896405	0	0	0.914751	0.402061	PRDX1;MMP9
nucleus of the inferior collicular brachium, caudal part	2/301	0.644339	0.896405	0	0	0.914751	0.402061	GRN;S100A6
nucleus of the stria terminalis, medial division, anterior part	2/301	0.644339	0.896405	0	0	0.914751	0.402061	S100A6;RPS21
nucleus sagulum, superficial part	2/301	0.644339	0.896405	0	0	0.914751	0.402061	S100A6;TAGLN2
occipital cortex	2/301	0.644339	0.896405	0	0	0.914751	0.402061	CDKN1A;DUSP6
oculomotor nucleus, main part	2/301	0.644339	0.896405	0	0	0.914751	0.402061	SPP1;MSN
p1 portion of the paranigral nucleus	2/301	0.644339	0.896405	0	0	0.914751	0.402061	SDC2;TIMP1
p2 portion of the substantia nigra pars reticulata	2/301	0.644339	0.896405	0	0	0.914751	0.402061	PABPC4;LAPTM5
p3 portion of the substantia nigra pars reticulata	2/301	0.644339	0.896405	0	0	0.914751	0.402061	MMP14;PABPC4
pallidal amygdala	2/301	0.644339	0.896405	0	0	0.914751	0.402061	CD63;DBI
pallium	2/301	0.644339	0.896405	0	0	0.914751	0.402061	IL1RN;DUSP6
pararubral nucleus, m1 part	2/301	0.644339	0.896405	0	0	0.914751	0.402061	IL1B;SPP1
paraseptal subpallium	2/301	0.644339	0.896405	0	0	0.914751	0.402061	ACTN1;PHLDA1
paraterete nucleus	2/301	0.644339	0.896405	0	0	0.914751	0.402061	GRN;PABPC4
parvicellular (lateral) subparafascicular nucleus	2/301	0.644339	0.896405	0	0	0.914751	0.402061	RGS16;IER3
parvocellular part of the r9LRt	2/301	0.644339	0.896405	0	0	0.914751	0.402061	NRG4;TIMP1
perilemniscal isthmic area	2/301	0.644339	0.896405	0	0	0.914751	0.402061	CFL1;S100A6
perirhinal-ectorhinal cortex	2/301	0.644339	0.896405	0	0	0.914751	0.402061	PLAUR;RPS27A
periventricular mantle of isBM	2/301	0.644339	0.896405	0	0	0.914751	0.402061	ITGB2;RPL37A
periventricular part of StrSe	2/301	0.644339	0.896405	0	0	0.914751	0.402061	DBI;B2M
periventricular stratum of DTTh	2/301	0.644339	0.896405	0	0	0.914751	0.402061	RGS16;LAPTM5
periventricular stratum of ITTh	2/301	0.644339	0.896405	0	0	0.914751	0.402061	SDC2;RGS16
periventricular stratum of Ist	2/301	0.644339	0.896405	0	0	0.914751	0.402061	RPS18;RPL37
periventricular stratum of Pal	2/301	0.644339	0.896405	0	0	0.914751	0.402061	ACTN1;S100A6
periventricular stratum of PcPL	2/301	0.644339	0.896405	0	0	0.914751	0.402061	CD63;SDC2
periventricular stratum of PcPV	2/301	0.644339	0.896405	0	0	0.914751	0.402061	RPL27A;ATP5G3
periventricular stratum of SeDg	2/301	0.644339	0.896405	0	0	0.914751	0.402061	S100A6;RPS21
periventricular stratum of SeStr	2/301	0.644339	0.896405	0	0	0.914751	0.402061	ACTN1;PHLDA1
periventricular stratum of Str	2/301	0.644339	0.896405	0	0	0.914751	0.402061	RAB31;ACTN1
periventricular stratum of cerebellar vermis	2/301	0.644339	0.896405	0	0	0.914751	0.402061	BTG1;S100A4
periventricular stratum of isBI	2/301	0.644339	0.896405	0	0	0.914751	0.402061	RPS6;RPL37A
periventricular stratum of isBL	2/301	0.644339	0.896405	0	0	0.914751	0.402061	RPS6;RPL37A
periventricular stratum of m1AL	2/301	0.644339	0.896405	0	0	0.914751	0.402061	RPS8;HMGA1
periventricular stratum of r10Lim	2/301	0.644339	0.896405	0	0	0.914751	0.402061	MSN;PLIN2
periventricular stratum of r1Ve	2/301	0.644339	0.896405	0	0	0.914751	0.402061	ITGB2;DBI
periventricular stratum of r2Co	2/301	0.644339	0.896405	0	0	0.914751	0.402061	MMP14;BTG1
periventricular stratum of r3Co	2/301	0.644339	0.896405	0	0	0.914751	0.402061	MMP14;ITGB2
periventricular stratum of r4Co	2/301	0.644339	0.896405	0	0	0.914751	0.402061	MMP14;LCP1
periventricular stratum of r5Co	2/301	0.644339	0.896405	0	0	0.914751	0.402061	MMP14;CCL20
periventricular stratum of r6Co	2/301	0.644339	0.896405	0	0	0.914751	0.402061	MMP14;CCL20
periventricular stratum of r8Tr	2/301	0.644339	0.896405	0	0	0.914751	0.402061	TAGLN2;PLIN2
periventricular stratum of r8Ve	2/301	0.644339	0.896405	0	0	0.914751	0.402061	S100A6;PLIN2
periventricular stratum of r9BM	2/301	0.644339	0.896405	0	0	0.914751	0.402061	GDF15;MSN
periventricular stratum of r9Tr	2/301	0.644339	0.896405	0	0	0.914751	0.402061	TAGLN2;PLIN2
periventricular stratum of r9Ve	2/301	0.644339	0.896405	0	0	0.914751	0.402061	HMGA1;PLIN2
pontine hindbrain	2/301	0.644339	0.896405	0	0	0.914751	0.402061	HMGA1;SPP1
posterior (ventral) nucleus	2/301	0.644339	0.896405	0	0	0.914751	0.402061	RGS16;IER3
posterior intralaminar nucleus	2/301	0.644339	0.896405	0	0	0.914751	0.402061	RGS16;IER3
posterior part of Int	2/301	0.644339	0.896405	0	0	0.914751	0.402061	ITGB2;DBI
posteromedial visual area	2/301	0.644339	0.896405	0	0	0.914751	0.402061	CDKN1A;DUSP6
posteromedial visual area, layer 4	2/301	0.644339	0.896405	0	0	0.914751	0.402061	CDKN1A;DUSP6
posteromedial visual area, layer 6b	2/301	0.644339	0.896405	0	0	0.914751	0.402061	CCL20;MSN
precommissural pretectal domain	2/301	0.644339	0.896405	0	0	0.914751	0.402061	RGS16;LAPTM5
preopto-hypothalamic area	2/301	0.644339	0.896405	0	0	0.914751	0.402061	RGS16;RPS21
preopto-hypothalamic band	2/301	0.644339	0.896405	0	0	0.914751	0.402061	RGS16;RPS21
prerubral area	2/301	0.644339	0.896405	0	0	0.914751	0.402061	RPS8;SDC2
pretectum	2/301	0.644339	0.896405	0	0	0.914751	0.402061	RGS16;LAPTM5
prethalamic (p3) zona limitans domain	2/301	0.644339	0.896405	0	0	0.914751	0.402061	RAB31;RGS16
prethalamus	2/301	0.644339	0.896405	0	0	0.914751	0.402061	RAB31;RGS16
prosomere 3	2/301	0.644339	0.896405	0	0	0.914751	0.402061	RAB31;RGS16
putamen	2/301	0.644339	0.896405	0	0	0.914751	0.402061	CAP1;ACTN1
pyramidal layer of IG	2/301	0.644339	0.896405	0	0	0.914751	0.402061	S100A4;HSPG2
r1 part of the 'mesencephalic' trigeminal nucleus	2/301	0.644339	0.896405	0	0	0.914751	0.402061	RPS18;PRDX1
r1 part of trigeminal sensory column	2/301	0.644339	0.896405	0	0	0.914751	0.402061	RPS18;SPP1
r1 part of vestibular nucleus Y	2/301	0.644339	0.896405	0	0	0.914751	0.402061	ITGB2;DBI
r1 part of vestibulocerebellar nucleus	2/301	0.644339	0.896405	0	0	0.914751	0.402061	ITGB2;DBI
r10 part of basointermediate reticular formation	2/301	0.644339	0.896405	0	0	0.914751	0.402061	HMGA1;S100A4
r10 part of external cuneate nucleus	2/301	0.644339	0.896405	0	0	0.914751	0.402061	PLIN2;PFN1
r10 part of the trigeminal column	2/301	0.644339	0.896405	0	0	0.914751	0.402061	TAGLN2;PLIN2
r10 part of the vestibular column	2/301	0.644339	0.896405	0	0	0.914751	0.402061	GDF15;PLIN2
r10 part of vagal motor nucleus	2/301	0.644339	0.896405	0	0	0.914751	0.402061	MSN;PLIN2
r2 part of anteroventral cochlear nucleus	2/301	0.644339	0.896405	0	0	0.914751	0.402061	BTG1;LCP1
r2 part of cochlear sensory column	2/301	0.644339	0.896405	0	0	0.914751	0.402061	BTG1;LCP1
r2 part of dorsal cochlear nucleus	2/301	0.644339	0.896405	0	0	0.914751	0.402061	MMP14;BTG1
r2 part of dorsal parvicellular reticular formation	2/301	0.644339	0.896405	0	0	0.914751	0.402061	SPP1;MSN
r2 part of median raphe nucleus	2/301	0.644339	0.896405	0	0	0.914751	0.402061	SPP1;RPL37
r2 part of the ventral parvicellular reticular formation	2/301	0.644339	0.896405	0	0	0.914751	0.402061	MSN;LCP1
r2 part of ventral lateral lemniscal nucleus	2/301	0.644339	0.896405	0	0	0.914751	0.402061	MMP14;TAGLN2
r3 basal plate	2/301	0.644339	0.896405	0	0	0.914751	0.402061	HMGA1;SPP1
r3 part of dorsal cochlear nucleus	2/301	0.644339	0.896405	0	0	0.914751	0.402061	MMP14;ITGB2
r3 part of reticulotegmental nucleus, shell portion	2/301	0.644339	0.896405	0	0	0.914751	0.402061	HMGA1;SPP1
r3 part of ventral lateral lemniscal nucleus	2/301	0.644339	0.896405	0	0	0.914751	0.402061	NRG4;SPP1
r4 basal plate	2/301	0.644339	0.896405	0	0	0.914751	0.402061	SLC20A1;SPP1
r4 part of basolateral reticular formation	2/301	0.644339	0.896405	0	0	0.914751	0.402061	SPP1;MMP9
r4 part of dorsal cochlear nucleus	2/301	0.644339	0.896405	0	0	0.914751	0.402061	MMP14;LCP1
r4 part of medial pontine nuclei	2/301	0.644339	0.896405	0	0	0.914751	0.402061	SLC20A1;SPP1
r4 part of pontine raphe cell population	2/301	0.644339	0.896405	0	0	0.914751	0.402061	SPP1;ZMPSTE24
r4 part of ventral parvicellular reticular formation	2/301	0.644339	0.896405	0	0	0.914751	0.402061	PRDX1;MMP9
r5 basal plate	2/301	0.644339	0.896405	0	0	0.914751	0.402061	SPP1;HSPG2
r5 part of A5 noradrenergic cell group	2/301	0.644339	0.896405	0	0	0.914751	0.402061	LCP1;MMP9
r5 part of basolateral reticular formation	2/301	0.644339	0.896405	0	0	0.914751	0.402061	SPP1;MMP9
r5 part of basomedial reticular formation	2/301	0.644339	0.896405	0	0	0.914751	0.402061	SPP1;HSPG2
r5 part of dorsal cochlear nucleus	2/301	0.644339	0.896405	0	0	0.914751	0.402061	MMP14;CCL20
r5 part of posteroventral cochlear nucleus	2/301	0.644339	0.896405	0	0	0.914751	0.402061	RPL27;PLIN2
r5 part of ventral parvicellular reticular formation	2/301	0.644339	0.896405	0	0	0.914751	0.402061	SPP1;MMP9
r6 alar plate	2/301	0.644339	0.896405	0	0	0.914751	0.402061	NRG4;MSN
r6 part of dorsal cochlear nucleus	2/301	0.644339	0.896405	0	0	0.914751	0.402061	MMP14;CCL20
r6 part of paragigantocellular nucleus	2/301	0.644339	0.896405	0	0	0.914751	0.402061	GDF15;IL1B
r6 part of posteroventral cochlear nucleus	2/301	0.644339	0.896405	0	0	0.914751	0.402061	CCL20;LCP1
r6 part of rostral ventromedial reticular area	2/301	0.644339	0.896405	0	0	0.914751	0.402061	NRG4;IL1B
r7 part of basolateral reticular formation	2/301	0.644339	0.896405	0	0	0.914751	0.402061	NRG4;ZMPSTE24
r7 part of parapyramidal nucleus	2/301	0.644339	0.896405	0	0	0.914751	0.402061	NRG4;IL1B
r8 (gustatory) part of solitary complex	2/301	0.644339	0.896405	0	0	0.914751	0.402061	TAGLN2;PLIN2
r8 part of basolateral reticular formation	2/301	0.644339	0.896405	0	0	0.914751	0.402061	NRG4;HLA-A
r8 part of parvocellular medial vestibular nucleus	2/301	0.644339	0.896405	0	0	0.914751	0.402061	S100A6;PLIN2
r8 portion of the hypoglossal motor nucleus	2/301	0.644339	0.896405	0	0	0.914751	0.402061	MSN;FAU
r9 (gustatory) part of solitary complex	2/301	0.644339	0.896405	0	0	0.914751	0.402061	TAGLN2;PLIN2
r9 part of basomedial reticular formation	2/301	0.644339	0.896405	0	0	0.914751	0.402061	GDF15;MSN
r9 part of dorsal parvicellular reticular formation	2/301	0.644339	0.896405	0	0	0.914751	0.402061	RPL37A;HMGA1
r9 part of parvocellular medial vestibular nucleus	2/301	0.644339	0.896405	0	0	0.914751	0.402061	HMGA1;PLIN2
r9 part of the vestibular column	2/301	0.644339	0.896405	0	0	0.914751	0.402061	TAGLN2;PLIN2
reticular complex	2/301	0.644339	0.896405	0	0	0.914751	0.402061	RAB31;RGS16
reticular formation of CoPL	2/301	0.644339	0.896405	0	0	0.914751	0.402061	LAPTM5;RPL27
reticular nucleus	2/301	0.644339	0.896405	0	0	0.914751	0.402061	RAB31;RGS16
retropontine reticular area	2/301	0.644339	0.896405	0	0	0.914751	0.402061	FCER1G;HSPG2
retroreuniens nucleus	2/301	0.644339	0.896405	0	0	0.914751	0.402061	SDC2;RGS16
reuniens nucleus, main part	2/301	0.644339	0.896405	0	0	0.914751	0.402061	RGS16;LAPTM5
rhombomere 3	2/301	0.644339	0.896405	0	0	0.914751	0.402061	HMGA1;SPP1
rhombomere 5	2/301	0.644339	0.896405	0	0	0.914751	0.402061	SPP1;HSPG2
rhombomere 6	2/301	0.644339	0.896405	0	0	0.914751	0.402061	NRG4;MSN
rostral secondary prosencephalon	2/301	0.644339	0.896405	0	0	0.914751	0.402061	SDC2;RPS21
secondary prosencephalon	2/301	0.644339	0.896405	0	0	0.914751	0.402061	ACTN1;DUSP6
septodiagonal transition area	2/301	0.644339	0.896405	0	0	0.914751	0.402061	NRG4;RPS21
septopallidal part of the olfactory tuberculum	2/301	0.644339	0.896405	0	0	0.914751	0.402061	NRG4;PHLDA1
septopallidal shell area	2/301	0.644339	0.896405	0	0	0.914751	0.402061	ACTN1;PHLDA1
septostriatal transition area (accumbens)	2/301	0.644339	0.896405	0	0	0.914751	0.402061	ACTN1;PHLDA1
shell of VMH	2/301	0.644339	0.896405	0	0	0.914751	0.402061	CD63;SDC2
striatum (corpus striatum)	2/301	0.644339	0.896405	0	0	0.914751	0.402061	CAP1;ACTN1
striohypothalamic nucleus	2/301	0.644339	0.896405	0	0	0.914751	0.402061	RPS21;PFDN5
subbrachial nucleus, caudal part	2/301	0.644339	0.896405	0	0	0.914751	0.402061	GRN;RPL37
subbrachial nucleus, rostral part	2/301	0.644339	0.896405	0	0	0.914751	0.402061	GRN;ITGB2
sublayer 6a of InsCx	2/301	0.644339	0.896405	0	0	0.914751	0.402061	ACTN4;IER3
subpallium	2/301	0.644339	0.896405	0	0	0.914751	0.402061	CAP1;ACTN1
superficial gray layer of SC	2/301	0.644339	0.896405	0	0	0.914751	0.402061	GDF15;S100A6
superficial stratum of AOD	2/301	0.644339	0.896405	0	0	0.914751	0.402061	IL1RN;GDF15
superficial stratum of AOV	2/301	0.644339	0.896405	0	0	0.914751	0.402061	IL1RN;YBX1
superficial stratum of CA	2/301	0.644339	0.896405	0	0	0.914751	0.402061	LAPTM5;PFN1
superficial stratum of CoPL	2/301	0.644339	0.896405	0	0	0.914751	0.402061	GDF15;LAPTM5
superficial stratum of Hb	2/301	0.644339	0.896405	0	0	0.914751	0.402061	CD63;ITGB2
superficial stratum of OCx (cortical plate/marginal zone)	2/301	0.644339	0.896405	0	0	0.914751	0.402061	CDKN1A;DUSP6
superficial stratum of PHyB-V	2/301	0.644339	0.896405	0	0	0.914751	0.402061	GRN;PABPC4
superficial stratum of POH	2/301	0.644339	0.896405	0	0	0.914751	0.402061	IL1B;S100A6
superficial stratum of PPaA	2/301	0.644339	0.896405	0	0	0.914751	0.402061	RAB31;RPS21
superficial stratum of PSPa	2/301	0.644339	0.896405	0	0	0.914751	0.402061	GRN;RPS21
superficial stratum of PcPL	2/301	0.644339	0.896405	0	0	0.914751	0.402061	RGS16;LAPTM5
superficial stratum of PcPV	2/301	0.644339	0.896405	0	0	0.914751	0.402061	RGS16;ITGB2
superficial stratum of SC	2/301	0.644339	0.896405	0	0	0.914751	0.402061	GDF15;S100A6
superficial stratum of SeDg	2/301	0.644339	0.896405	0	0	0.914751	0.402061	NRG4;TIMP1
superficial stratum of SePal	2/301	0.644339	0.896405	0	0	0.914751	0.402061	NRG4;PHLDA1
superficial stratum of VTTh	2/301	0.644339	0.896405	0	0	0.914751	0.402061	RGS16;RPL11
superficial stratum of m1AL	2/301	0.644339	0.896405	0	0	0.914751	0.402061	GRN;ITGB2
superficial stratum of m2ADL	2/301	0.644339	0.896405	0	0	0.914751	0.402061	S100A6;TAGLN2
superficial stratum of m2B	2/301	0.644339	0.896405	0	0	0.914751	0.402061	GRN;SDC2
superficial stratum of p2B	2/301	0.644339	0.896405	0	0	0.914751	0.402061	SDC2;PABPC4
superficial stratum of p3B	2/301	0.644339	0.896405	0	0	0.914751	0.402061	MMP14;PABPC4
superficial stratum of r10Ve	2/301	0.644339	0.896405	0	0	0.914751	0.402061	PLIN2;PFN1
superficial stratum of r2BL	2/301	0.644339	0.896405	0	0	0.914751	0.402061	MMP14;TAGLN2
superficial stratum of r2Co	2/301	0.644339	0.896405	0	0	0.914751	0.402061	BTG1;LCP1
superficial stratum of r3BL	2/301	0.644339	0.896405	0	0	0.914751	0.402061	NRG4;SPP1
superficial stratum of r4BM	2/301	0.644339	0.896405	0	0	0.914751	0.402061	SLC20A1;SPP1
superficial stratum of r5BM	2/301	0.644339	0.896405	0	0	0.914751	0.402061	FCER1G;HSPG2
superficial stratum of r5Co	2/301	0.644339	0.896405	0	0	0.914751	0.402061	RPL27;PLIN2
superficial stratum of r5Lim	2/301	0.644339	0.896405	0	0	0.914751	0.402061	PRDX1;MMP9
superficial stratum of r6Co	2/301	0.644339	0.896405	0	0	0.914751	0.402061	CCL20;LCP1
superficial stratum of r7BM	2/301	0.644339	0.896405	0	0	0.914751	0.402061	NRG4;IL1B
superficial stratum of r9BL	2/301	0.644339	0.896405	0	0	0.914751	0.402061	NRG4;S100A4
superficial stratum of the IG	2/301	0.644339	0.896405	0	0	0.914751	0.402061	S100A4;HSPG2
tectal gray formation	2/301	0.644339	0.896405	0	0	0.914751	0.402061	GDF15;RPL27
telencephalic vesicle	2/301	0.644339	0.896405	0	0	0.914751	0.402061	ACTN1;DUSP6
temporal muscle trigeminal motor cell group	2/301	0.644339	0.896405	0	0	0.914751	0.402061	MSN;MMP9
terminal paraventricular area of THyA	2/301	0.644339	0.896405	0	0	0.914751	0.402061	RGS16;RPS21
thalamic (p2) zona limitans domain	2/301	0.644339	0.896405	0	0	0.914751	0.402061	RGS16;RPL27
thalamic tegmentum	2/301	0.644339	0.896405	0	0	0.914751	0.402061	SDC2;RGS16
triangular septal nucleus	2/301	0.644339	0.896405	0	0	0.914751	0.402061	BTG1;ITGB2
ventral endopiriform nucleus	2/301	0.644339	0.896405	0	0	0.914751	0.402061	TYROBP;ACTG1
ventral entopeduncular nucleus	2/301	0.644339	0.896405	0	0	0.914751	0.402061	GRN;RPS21
ventral isthmic part of dorsal raphe nucleus	2/301	0.644339	0.896405	0	0	0.914751	0.402061	ITGB2;RPL37A
ventral paracommissural tectal nucleus, m1 part	2/301	0.644339	0.896405	0	0	0.914751	0.402061	RPL27A;RPL37A
ventral part of CoP	2/301	0.644339	0.896405	0	0	0.914751	0.402061	RPL27A;ATP5G3
ventral part of PHyB	2/301	0.644339	0.896405	0	0	0.914751	0.402061	SDC2;TIMP1
ventral posterior parvicellular nucleus	2/301	0.644339	0.896405	0	0	0.914751	0.402061	IL1B;RGS16
ventral posterolateral nucleus	2/301	0.644339	0.896405	0	0	0.914751	0.402061	RAB31;RGS16
ventral posteromedial nucleus	2/301	0.644339	0.896405	0	0	0.914751	0.402061	IL1B;RGS16
ventral subnucleus of MG	2/301	0.644339	0.896405	0	0	0.914751	0.402061	RGS16;RPL11
ventromedial nucleus	2/301	0.644339	0.896405	0	0	0.914751	0.402061	RGS16;RPL27
ventromedial preoptic nucleus	2/301	0.644339	0.896405	0	0	0.914751	0.402061	RGS16;TIMP1
white matter of cerebellar vermis	2/301	0.644339	0.896405	0	0	0.914751	0.402061	BTG1;S100A4
Parabigeminal nucleus	3/475	0.672897	0.896405	0	0	0.867585	0.343706	GRN;ITGB2;S100A6
Field CA3, stratum radiatum	2/342	0.712228	0.896405	0	0	0.802756	0.272421	LAPTM5;PFN1
Field CA1, stratum oriens	2/343	0.71374	0.896405	0	0	0.800361	0.269911	PFN1;DUSP6
Field CA1, stratum radiatum	2/345	0.716746	0.896405	0	0	0.795613	0.264966	PFN1;DUSP6
Rhomboid nucleus	2/345	0.716746	0.896405	0	0	0.795613	0.264966	RGS16;LAPTM5
Peripeduncular nucleus	3/532	0.745167	0.896405	0	0	0.771826	0.22703	TMED9;CCL20;RPL11
Anterior tegmental nucleus	3/552	0.767337	0.896405	0	0	0.742939	0.196752	FTH1;SDC2;ZMPSTE24
Field CA1, stratum lacunosum-moleculare	2/383	0.769003	0.896405	0	0	0.714865	0.187767	LAPTM5;PFN1
Lateral mammillary nucleus	2/384	0.770259	0.896405	0	0	0.712957	0.186103	PABPC4;TIMP1
Claustrum	2/386	0.772752	0.896405	0	0	0.709171	0.182822	TYROBP;IER3
Parafascicular nucleus	2/393	0.781294	0.896405	0	0	0.696224	0.171831	RGS16;IER3
Dorsal tegmental nucleus	2/396	0.784869	0.896405	0	0	0.690817	0.167342	RPS6;RPL37A
Nucleus incertus	2/398	0.787224	0.896405	0	0	0.687257	0.164421	PLIN2;YBX1
Midbrain	2/404	0.794154	0.896405	0	0	0.676791	0.155986	S100A6;RPL27
Bed nucleus of the anterior commissure	2/450	0.840994	0.896405	0	0	0.605863	0.104918	RGS16;TAGLN2
Anterior hypothalamic nucleus	2/492	0.875149	0.896405	0	0	0.552733	0.0737129	CANX;RPS21
Agranular insular area, posterior part, layer 6a	1/301	0.889952	0.896405	0	0	0.452662	0.0527747	PLAUR
Agranular insular area, ventral part, layer 5	1/301	0.889952	0.896405	0	0	0.452662	0.0527747	TYROBP
Ammon's horn	1/301	0.889952	0.896405	0	0	0.452662	0.0527747	PFN1
Ansiform lobule	1/301	0.889952	0.896405	0	0	0.452662	0.0527747	BTG1
Anterior cingulate area, dorsal part, layer 1	1/301	0.889952	0.896405	0	0	0.452662	0.0527747	S100A6
Anterior cingulate area, ventral part, 6a	1/301	0.889952	0.896405	0	0	0.452662	0.0527747	PLAUR
Anterior cingulate area, ventral part, 6b	1/301	0.889952	0.896405	0	0	0.452662	0.0527747	PLAUR
Anterior cingulate area, ventral part, layer 5	1/301	0.889952	0.896405	0	0	0.452662	0.0527747	DUSP6
Anteromedial nucleus, dorsal part	1/301	0.889952	0.896405	0	0	0.452662	0.0527747	RGS16
Anteromedial nucleus, ventral part	1/301	0.889952	0.896405	0	0	0.452662	0.0527747	RGS16
Anteromedial visual area, layer 6a	1/301	0.889952	0.896405	0	0	0.452662	0.0527747	CDKN1A
Basic cell groups and regions	1/301	0.889952	0.896405	0	0	0.452662	0.0527747	DUSP6
Basolateral amygdalar nucleus	1/301	0.889952	0.896405	0	0	0.452662	0.0527747	PLAUR
Basolateral amygdalar nucleus, anterior part	1/301	0.889952	0.896405	0	0	0.452662	0.0527747	PLAUR
Basolateral amygdalar nucleus, posterior part	1/301	0.889952	0.896405	0	0	0.452662	0.0527747	PLAUR
Basomedial amygdalar nucleus, posterior part	1/301	0.889952	0.896405	0	0	0.452662	0.0527747	LCP1
Bed nuclei of the stria terminalis, anterior division, ventral nucleus	1/301	0.889952	0.896405	0	0	0.452662	0.0527747	RPS21
Bed nuclei of the stria terminalis, posterior division, strial extension	1/301	0.889952	0.896405	0	0	0.452662	0.0527747	CD63
Brain stem	1/301	0.889952	0.896405	0	0	0.452662	0.0527747	RGS16
Central amygdalar nucleus	1/301	0.889952	0.896405	0	0	0.452662	0.0527747	RPS19
Central linear nucleus raphe	1/301	0.889952	0.896405	0	0	0.452662	0.0527747	SDC2
Central lobule	1/301	0.889952	0.896405	0	0	0.452662	0.0527747	BTG1
Central medial nucleus of the thalamus	1/301	0.889952	0.896405	0	0	0.452662	0.0527747	RGS16
Cerebellar cortex	1/301	0.889952	0.896405	0	0	0.452662	0.0527747	BTG1
Cerebellum	1/301	0.889952	0.896405	0	0	0.452662	0.0527747	BTG1
CoPV part of the periaqueductal gray	1/301	0.889952	0.896405	0	0	0.452662	0.0527747	RPL27A
Cochlear nucleus, subpedunclular granular region	1/301	0.889952	0.896405	0	0	0.452662	0.0527747	BTG1
Cortical amygdalar area, anterior part, layer 2	1/301	0.889952	0.896405	0	0	0.452662	0.0527747	PSAP
Cortical amygdalar area, posterior part, lateral zone, layer 1	1/301	0.889952	0.896405	0	0	0.452662	0.0527747	MMP14
Crus 1	1/301	0.889952	0.896405	0	0	0.452662	0.0527747	BTG1
Crus 1, granular layer	1/301	0.889952	0.896405	0	0	0.452662	0.0527747	BTG1
Crus 1, molecular layer	1/301	0.889952	0.896405	0	0	0.452662	0.0527747	BTG1
Crus 2	1/301	0.889952	0.896405	0	0	0.452662	0.0527747	BTG1
Crus 2, granular layer	1/301	0.889952	0.896405	0	0	0.452662	0.0527747	BTG1
Crus 2, molecular layer	1/301	0.889952	0.896405	0	0	0.452662	0.0527747	BTG1
Culmen	1/301	0.889952	0.896405	0	0	0.452662	0.0527747	BTG1
Declive (VI)	1/301	0.889952	0.896405	0	0	0.452662	0.0527747	BTG1
Declive (VI), granular layer	1/301	0.889952	0.896405	0	0	0.452662	0.0527747	BTG1
Declive (VI), molecular layer	1/301	0.889952	0.896405	0	0	0.452662	0.0527747	BTG1
Dorsal nucleus raphe	1/301	0.889952	0.896405	0	0	0.452662	0.0527747	RPL37A
Dorsal part of the lateral geniculate complex	1/301	0.889952	0.896405	0	0	0.452662	0.0527747	RGS16
Entorhinal area	1/301	0.889952	0.896405	0	0	0.452662	0.0527747	PLIN2
Entorhinal area, lateral part	1/301	0.889952	0.896405	0	0	0.452662	0.0527747	PLIN2
Entorhinal area, lateral part, layer 2b	1/301	0.889952	0.896405	0	0	0.452662	0.0527747	PLIN2
Entorhinal area, lateral part, layer 3	1/301	0.889952	0.896405	0	0	0.452662	0.0527747	PLIN2
Entorhinal area, lateral part, layer 5	1/301	0.889952	0.896405	0	0	0.452662	0.0527747	PLIN2
Entorhinal area, medial part, dorsal zone, layer 3	1/301	0.889952	0.896405	0	0	0.452662	0.0527747	PLIN2
External cuneate nucleus	1/301	0.889952	0.896405	0	0	0.452662	0.0527747	IL1B
Field CA2, stratum pyramidale	1/301	0.889952	0.896405	0	0	0.452662	0.0527747	PFN1
Fields of Forel	1/301	0.889952	0.896405	0	0	0.452662	0.0527747	RPL35A
Folium-tuber vermis (VII)	1/301	0.889952	0.896405	0	0	0.452662	0.0527747	BTG1
Folium-tuber vermis (VII), granular layer	1/301	0.889952	0.896405	0	0	0.452662	0.0527747	BTG1
Folium-tuber vermis (VII), molecular layer	1/301	0.889952	0.896405	0	0	0.452662	0.0527747	BTG1
Frontal pole, cerebral cortex	1/301	0.889952	0.896405	0	0	0.452662	0.0527747	IL1RN
Frontal pole, layer 2/3	1/301	0.889952	0.896405	0	0	0.452662	0.0527747	IL1RN
Fundus of striatum	1/301	0.889952	0.896405	0	0	0.452662	0.0527747	IL1B
Geniculate group, dorsal thalamus	1/301	0.889952	0.896405	0	0	0.452662	0.0527747	RGS16
Geniculate group, ventral thalamus	1/301	0.889952	0.896405	0	0	0.452662	0.0527747	RGS16
Gigantocellular reticular nucleus	1/301	0.889952	0.896405	0	0	0.452662	0.0527747	GDF15
Gracile nucleus	1/301	0.889952	0.896405	0	0	0.452662	0.0527747	PLIN2
Granular lamina of the cochlear nuclei	1/301	0.889952	0.896405	0	0	0.452662	0.0527747	CCL20
Gustatory areas, layer 1	1/301	0.889952	0.896405	0	0	0.452662	0.0527747	B2M
Hemispheric regions	1/301	0.889952	0.896405	0	0	0.452662	0.0527747	BTG1
Hypothalamic lateral zone	1/301	0.889952	0.896405	0	0	0.452662	0.0527747	RPS21
Hypothalamic medial zone	1/301	0.889952	0.896405	0	0	0.452662	0.0527747	SDC2
Inferior colliculus, external nucleus	1/301	0.889952	0.896405	0	0	0.452662	0.0527747	S100A6
Inferior olivary complex	1/301	0.889952	0.896405	0	0	0.452662	0.0527747	TIMP1
Inferior salivatory nucleus	1/301	0.889952	0.896405	0	0	0.452662	0.0527747	RPL37
Intercalated amygdalar nucleus	1/301	0.889952	0.896405	0	0	0.452662	0.0527747	ACTG1
Intergeniculate leaflet of the lateral geniculate complex	1/301	0.889952	0.896405	0	0	0.452662	0.0527747	RGS16
Intermediate reticular nucleus	1/301	0.889952	0.896405	0	0	0.452662	0.0527747	TAGLN2
Intermediodorsal nucleus of the thalamus	1/301	0.889952	0.896405	0	0	0.452662	0.0527747	RGS16
Intralaminar nuclei of the dorsal thalamus	1/301	0.889952	0.896405	0	0	0.452662	0.0527747	RGS16
Islands of Calleja	1/301	0.889952	0.896405	0	0	0.452662	0.0527747	NRG4
Isocortex	1/301	0.889952	0.896405	0	0	0.452662	0.0527747	DUSP6
JcPV part of the periaqueductal gray	1/301	0.889952	0.896405	0	0	0.452662	0.0527747	RPL27A
Lateral dorsal nucleus of thalamus	1/301	0.889952	0.896405	0	0	0.452662	0.0527747	RGS16
Lateral group of the dorsal thalamus	1/301	0.889952	0.896405	0	0	0.452662	0.0527747	RGS16
Lateral hypothalamic area	1/301	0.889952	0.896405	0	0	0.452662	0.0527747	RPS21
Lateral posterior nucleus of the thalamus	1/301	0.889952	0.896405	0	0	0.452662	0.0527747	RGS16
Lateral preoptic area	1/301	0.889952	0.896405	0	0	0.452662	0.0527747	RPS21
Lateral reticular nucleus, parvicellular part	1/301	0.889952	0.896405	0	0	0.452662	0.0527747	IL1B
Linear nucleus of the medulla	1/301	0.889952	0.896405	0	0	0.452662	0.0527747	ZMPSTE24
Lobule III	1/301	0.889952	0.896405	0	0	0.452662	0.0527747	BTG1
Lobule III, granular layer	1/301	0.889952	0.896405	0	0	0.452662	0.0527747	BTG1
Lobule III, molecular layer	1/301	0.889952	0.896405	0	0	0.452662	0.0527747	BTG1
Lobules IV-V	1/301	0.889952	0.896405	0	0	0.452662	0.0527747	BTG1
Lobules IV-V, granular layer	1/301	0.889952	0.896405	0	0	0.452662	0.0527747	BTG1
Lobules IV-V, molecular layer	1/301	0.889952	0.896405	0	0	0.452662	0.0527747	BTG1
Magnocellular nucleus	1/301	0.889952	0.896405	0	0	0.452662	0.0527747	PABPC4
Magnocellular reticular nucleus	1/301	0.889952	0.896405	0	0	0.452662	0.0527747	IL1B
Major island of Calleja	1/301	0.889952	0.896405	0	0	0.452662	0.0527747	GAPDH
Medial amygdalar nucleus, anterodorsal part	1/301	0.889952	0.896405	0	0	0.452662	0.0527747	RPS19
Medial amygdalar nucleus, anteroventral part	1/301	0.889952	0.896405	0	0	0.452662	0.0527747	LAPTM5
Medial amygdalar nucleus, posterodorsal part, sublayer c	1/301	0.889952	0.896405	0	0	0.452662	0.0527747	DBI
Medial geniculate complex, dorsal part	1/301	0.889952	0.896405	0	0	0.452662	0.0527747	RGS16
Medial geniculate complex, medial part	1/301	0.889952	0.896405	0	0	0.452662	0.0527747	RGS16
Medial group of the dorsal thalamus	1/301	0.889952	0.896405	0	0	0.452662	0.0527747	RGS16
Medial septal complex	1/301	0.889952	0.896405	0	0	0.452662	0.0527747	PABPC4
Medial vestibular nucleus	1/301	0.889952	0.896405	0	0	0.452662	0.0527747	ITGB2
Mediodorsal nucleus of thalamus	1/301	0.889952	0.896405	0	0	0.452662	0.0527747	RGS16
Mediodorsal nucleus of the thalamus, central part	1/301	0.889952	0.896405	0	0	0.452662	0.0527747	RGS16
Mediodorsal nucleus of the thalamus, lateral part	1/301	0.889952	0.896405	0	0	0.452662	0.0527747	RGS16
Mediodorsal nucleus of the thalamus, medial part	1/301	0.889952	0.896405	0	0	0.452662	0.0527747	RGS16
Medullary reticular nucleus, dorsal part	1/301	0.889952	0.896405	0	0	0.452662	0.0527747	FTH1
Medullary reticular nucleus, ventral part	1/301	0.889952	0.896405	0	0	0.452662	0.0527747	S100A4
Midbrain, motor related	1/301	0.889952	0.896405	0	0	0.452662	0.0527747	RPS8
Midbrain, sensory related	1/301	0.889952	0.896405	0	0	0.452662	0.0527747	S100A6
Motor nucleus of trigeminal	1/301	0.889952	0.896405	0	0	0.452662	0.0527747	MSN
Nodulus (X), molecular layer	1/301	0.889952	0.896405	0	0	0.452662	0.0527747	ITGB2
Nucleus of Darkschewitsch	1/301	0.889952	0.896405	0	0	0.452662	0.0527747	TIMP1
Nucleus of the lateral olfactory tract, pyramidal layer	1/301	0.889952	0.896405	0	0	0.452662	0.0527747	PSAP
Nucleus of the optic tract	1/301	0.889952	0.896405	0	0	0.452662	0.0527747	LAPTM5
Nucleus of the solitary tract, lateral part	1/301	0.889952	0.896405	0	0	0.452662	0.0527747	RPL37A
Nucleus of the trapezoid body	1/301	0.889952	0.896405	0	0	0.452662	0.0527747	HSPG2
Olfactory tubercle	1/301	0.889952	0.896405	0	0	0.452662	0.0527747	YBX1
Olfactory tubercle, molecular layer	1/301	0.889952	0.896405	0	0	0.452662	0.0527747	YBX1
Olfactory tubercle, polymorph layer	1/301	0.889952	0.896405	0	0	0.452662	0.0527747	YBX1
Olfactory tubercle, pyramidal layer	1/301	0.889952	0.896405	0	0	0.452662	0.0527747	YBX1
Parabrachial nucleus, lateral division, superior lateral part	1/301	0.889952	0.896405	0	0	0.452662	0.0527747	RPS18
Paragigantocellular reticular nucleus, dorsal part	1/301	0.889952	0.896405	0	0	0.452662	0.0527747	SPP1
Paramedian lobule	1/301	0.889952	0.896405	0	0	0.452662	0.0527747	BTG1
Paramedian lobule, granular layer	1/301	0.889952	0.896405	0	0	0.452662	0.0527747	BTG1
Paramedian lobule, molecular layer	1/301	0.889952	0.896405	0	0	0.452662	0.0527747	BTG1
Parapyramidal nucleus	1/301	0.889952	0.896405	0	0	0.452662	0.0527747	NRG4
Parasubiculum, layer 3	1/301	0.889952	0.896405	0	0	0.452662	0.0527747	RLF
Perireunensis nucleus	1/301	0.889952	0.896405	0	0	0.452662	0.0527747	RGS16
Piriform area	1/301	0.889952	0.896405	0	0	0.452662	0.0527747	TYROBP
Piriform area, molecular layer	1/301	0.889952	0.896405	0	0	0.452662	0.0527747	TYROBP
Piriform area, polymorph layer	1/301	0.889952	0.896405	0	0	0.452662	0.0527747	TYROBP
Piriform area, pyramidal layer	1/301	0.889952	0.896405	0	0	0.452662	0.0527747	TYROBP
Piriform-amygdalar area, molecular layer	1/301	0.889952	0.896405	0	0	0.452662	0.0527747	TYROBP
Piriform-amygdalar area, polymorph layer	1/301	0.889952	0.896405	0	0	0.452662	0.0527747	PLIN2
Piriform-amygdalar area, pyramidal layer	1/301	0.889952	0.896405	0	0	0.452662	0.0527747	TYROBP
Pons, behavioral state related	1/301	0.889952	0.896405	0	0	0.452662	0.0527747	SPP1
Pontine reticular nucleus	1/301	0.889952	0.896405	0	0	0.452662	0.0527747	SPP1
Posterior amygdalar nucleus	1/301	0.889952	0.896405	0	0	0.452662	0.0527747	PSAP
Posterior limiting nucleus of the thalamus	1/301	0.889952	0.896405	0	0	0.452662	0.0527747	RGS16
Posterior pretectal nucleus	1/301	0.889952	0.896405	0	0	0.452662	0.0527747	RPL27
Posterolateral visual area, layer 6b	1/301	0.889952	0.896405	0	0	0.452662	0.0527747	CAP1
Postpiriform transition area	1/301	0.889952	0.896405	0	0	0.452662	0.0527747	PLAUR
Postpiriform transition area, layers 1	1/301	0.889952	0.896405	0	0	0.452662	0.0527747	PLAUR
Postpiriform transition area, layers 3	1/301	0.889952	0.896405	0	0	0.452662	0.0527747	PLAUR
Postsubiculum, layer 2	1/301	0.889952	0.896405	0	0	0.452662	0.0527747	GDF15
Prelimbic area, layer 1	1/301	0.889952	0.896405	0	0	0.452662	0.0527747	IL1RN
Prelimbic area, layer 6b	1/301	0.889952	0.896405	0	0	0.452662	0.0527747	RPL5
Presubiculum, layer 2	1/301	0.889952	0.896405	0	0	0.452662	0.0527747	GDF15
Presubiculum, layer 3	1/301	0.889952	0.896405	0	0	0.452662	0.0527747	CAP1
Primary motor area, Layer 6b	1/301	0.889952	0.896405	0	0	0.452662	0.0527747	TMED9
Primary somatosensory area, lower limb	1/301	0.889952	0.896405	0	0	0.452662	0.0527747	DUSP6
Primary somatosensory area, lower limb, layer 2/3	1/301	0.889952	0.896405	0	0	0.452662	0.0527747	RPL27
Primary somatosensory area, lower limb, layer 6a	1/301	0.889952	0.896405	0	0	0.452662	0.0527747	TMED9
Primary somatosensory area, lower limb, layer 6b	1/301	0.889952	0.896405	0	0	0.452662	0.0527747	TMED9
Primary somatosensory area, mouth, layer 6b	1/301	0.889952	0.896405	0	0	0.452662	0.0527747	ACTN4
Primary somatosensory area, trunk	1/301	0.889952	0.896405	0	0	0.452662	0.0527747	DUSP6
Primary somatosensory area, trunk, layer 2/3	1/301	0.889952	0.896405	0	0	0.452662	0.0527747	DUSP6
Primary somatosensory area, trunk, layer 4	1/301	0.889952	0.896405	0	0	0.452662	0.0527747	CCL20
Primary somatosensory area, trunk, layer 5	1/301	0.889952	0.896405	0	0	0.452662	0.0527747	LASP1
Primary somatosensory area, unassigned, layer 2/3	1/301	0.889952	0.896405	0	0	0.452662	0.0527747	B2M
Primary somatosensory area, unassigned, layer 4	1/301	0.889952	0.896405	0	0	0.452662	0.0527747	PLAUR
Primary somatosensory area, unassigned, layer 6a	1/301	0.889952	0.896405	0	0	0.452662	0.0527747	LASP1
Primary somatosensory area, upper limb, layer 1	1/301	0.889952	0.896405	0	0	0.452662	0.0527747	HLA-A
Primary somatosensory area, upper limb, layer 2/3	1/301	0.889952	0.896405	0	0	0.452662	0.0527747	HLA-A
Primary somatosensory area, upper limb, layer 4	1/301	0.889952	0.896405	0	0	0.452662	0.0527747	HLA-A
Purkinje cell layer of CbHCx	1/301	0.889952	0.896405	0	0	0.452662	0.0527747	BTG1
Purkinje cell layer of CbVCx	1/301	0.889952	0.896405	0	0	0.452662	0.0527747	BTG1
Pyramus (VIII)	1/301	0.889952	0.896405	0	0	0.452662	0.0527747	BTG1
Pyramus (VIII), granular layer	1/301	0.889952	0.896405	0	0	0.452662	0.0527747	BTG1
Pyramus (VIII), molecular layer	1/301	0.889952	0.896405	0	0	0.452662	0.0527747	BTG1
Red nucleus	1/301	0.889952	0.896405	0	0	0.452662	0.0527747	SDC2
Retrosplenial area, dorsal part, layer 2/3	1/301	0.889952	0.896405	0	0	0.452662	0.0527747	DUSP6
Retrosplenial area, ventral part, layer 1	1/301	0.889952	0.896405	0	0	0.452662	0.0527747	MMP14
Retrosplenial area, ventral part, layer 6a	1/301	0.889952	0.896405	0	0	0.452662	0.0527747	S100A4
Secondary motor area, layer 6b	1/301	0.889952	0.896405	0	0	0.452662	0.0527747	TMED9
Simple lobule	1/301	0.889952	0.896405	0	0	0.452662	0.0527747	BTG1
Simple lobule, granular layer	1/301	0.889952	0.896405	0	0	0.452662	0.0527747	BTG1
Simple lobule, molecular layer	1/301	0.889952	0.896405	0	0	0.452662	0.0527747	BTG1
Spinal nucleus of the trigeminal, interpolar part	1/301	0.889952	0.896405	0	0	0.452662	0.0527747	LAPTM5
Spinal nucleus of the trigeminal, oral part, middle dorsomedial part, ventral zone	1/301	0.889952	0.896405	0	0	0.452662	0.0527747	LAPTM5
Spinal nucleus of the trigeminal, oral part, ventrolateral part	1/301	0.889952	0.896405	0	0	0.452662	0.0527747	LAPTM5
Striatum ventral region	1/301	0.889952	0.896405	0	0	0.452662	0.0527747	ACTN1
Striatum-like amygdalar nuclei	1/301	0.889952	0.896405	0	0	0.452662	0.0527747	RPS19
Subiculum, ventral part	1/301	0.889952	0.896405	0	0	0.452662	0.0527747	YWHAB
Submedial nucleus of the thalamus	1/301	0.889952	0.896405	0	0	0.452662	0.0527747	RGS16
Subparafascicular nucleus	1/301	0.889952	0.896405	0	0	0.452662	0.0527747	RGS16
Subparafascicular nucleus, parvicellular part	1/301	0.889952	0.896405	0	0	0.452662	0.0527747	RGS16
Subparaventricular zone	1/301	0.889952	0.896405	0	0	0.452662	0.0527747	RGS16
Substantia nigra, compact part	1/301	0.889952	0.896405	0	0	0.452662	0.0527747	SDC2
Superior central nucleus raphe	1/301	0.889952	0.896405	0	0	0.452662	0.0527747	SPP1
Superior central nucleus raphe, lateral part	1/301	0.889952	0.896405	0	0	0.452662	0.0527747	SPP1
Superior colliculus, motor related	1/301	0.889952	0.896405	0	0	0.452662	0.0527747	RPL27
Superior colliculus, motor related, deep gray layer	1/301	0.889952	0.896405	0	0	0.452662	0.0527747	RPS8
Superior colliculus, motor related, intermediate gray layer	1/301	0.889952	0.896405	0	0	0.452662	0.0527747	RPL27
Superior colliculus, motor related, intermediate gray layer, sublayer b	1/301	0.889952	0.896405	0	0	0.452662	0.0527747	RPL27
Superior colliculus, motor related, intermediate gray layer, sublayer c	1/301	0.889952	0.896405	0	0	0.452662	0.0527747	RPL27
Superior colliculus, motor related, intermediate white layer	1/301	0.889952	0.896405	0	0	0.452662	0.0527747	RPL27
Superior olivary complex, medial part	1/301	0.889952	0.896405	0	0	0.452662	0.0527747	PABPC4
Superior vestibular nucleus	1/301	0.889952	0.896405	0	0	0.452662	0.0527747	SPP1
Supramammillary nucleus, lateral part	1/301	0.889952	0.896405	0	0	0.452662	0.0527747	PABPC4
Taenia tecta, dorsal part, layer 4	1/301	0.889952	0.896405	0	0	0.452662	0.0527747	GRN
Taenia tecta, ventral part, layer 3	1/301	0.889952	0.896405	0	0	0.452662	0.0527747	YBX1
Temporal association areas, layer 6b	1/301	0.889952	0.896405	0	0	0.452662	0.0527747	PLAUR
Thalamus, polymodal association cortex related	1/301	0.889952	0.896405	0	0	0.452662	0.0527747	RGS16
Thalamus, sensory-motor cortex related	1/301	0.889952	0.896405	0	0	0.452662	0.0527747	RGS16
Ventral posterior complex of the thalamus	1/301	0.889952	0.896405	0	0	0.452662	0.0527747	RGS16
Ventral posteromedial nucleus of the thalamus	1/301	0.889952	0.896405	0	0	0.452662	0.0527747	RGS16
Ventral tegmental area	1/301	0.889952	0.896405	0	0	0.452662	0.0527747	SDC2
Ventromedial hypothalamic nucleus, anterior part	1/301	0.889952	0.896405	0	0	0.452662	0.0527747	PLAUR
Vermal regions	1/301	0.889952	0.896405	0	0	0.452662	0.0527747	BTG1
Vestibular nuclei	1/301	0.889952	0.896405	0	0	0.452662	0.0527747	ITGB2
abducens motor nucleus	1/301	0.889952	0.896405	0	0	0.452662	0.0527747	GDF15
alar plate of p2 (alar thalamus)	1/301	0.889952	0.896405	0	0	0.452662	0.0527747	RGS16
amygdalo-striatal transition	1/301	0.889952	0.896405	0	0	0.452662	0.0527747	ITGB2
anterior part of Int	1/301	0.889952	0.896405	0	0	0.452662	0.0527747	BTG1
anterior pretectal nucleus, ventral core part	1/301	0.889952	0.896405	0	0	0.452662	0.0527747	RGS16
anteroventral part of alar thalamus	1/301	0.889952	0.896405	0	0	0.452662	0.0527747	RGS16
basal plate of p1	1/301	0.889952	0.896405	0	0	0.452662	0.0527747	SDC2
basal plate of p2	1/301	0.889952	0.896405	0	0	0.452662	0.0527747	SDC2
basal reticular formation of p1	1/301	0.889952	0.896405	0	0	0.452662	0.0527747	SDC2
basointermediate isthmic reticular formation	1/301	0.889952	0.896405	0	0	0.452662	0.0527747	FTH1
basolateral amygdaloid nucleus, anterior part	1/301	0.889952	0.896405	0	0	0.452662	0.0527747	PLAUR
basolateral amygdaloid nucleus, posterior part	1/301	0.889952	0.896405	0	0	0.452662	0.0527747	PLAUR
basomedial amygdaloid nucleus, posterior part	1/301	0.889952	0.896405	0	0	0.452662	0.0527747	YWHAB
bed nucleus of the stria terminalis, mediocentral division	1/301	0.889952	0.896405	0	0	0.452662	0.0527747	RAB31
central layers of TG	1/301	0.889952	0.896405	0	0	0.452662	0.0527747	RPL27
central part of MD	1/301	0.889952	0.896405	0	0	0.452662	0.0527747	RGS16
cerebellar hemisphere	1/301	0.889952	0.896405	0	0	0.452662	0.0527747	BTG1
cerebellar vermis	1/301	0.889952	0.896405	0	0	0.452662	0.0527747	BTG1
cerebellar white matter	1/301	0.889952	0.896405	0	0	0.452662	0.0527747	BTG1
cingulate cortex	1/301	0.889952	0.896405	0	0	0.452662	0.0527747	DUSP6
core part of the anterobasal nucleus	1/301	0.889952	0.896405	0	0	0.452662	0.0527747	SDC2
cortex of cerebellar hemisphere	1/301	0.889952	0.896405	0	0	0.452662	0.0527747	BTG1
cortex of cerebellar vermis	1/301	0.889952	0.896405	0	0	0.452662	0.0527747	BTG1
corticoid layer of TuStr	1/301	0.889952	0.896405	0	0	0.452662	0.0527747	YBX1
deep gray layer of SC	1/301	0.889952	0.896405	0	0	0.452662	0.0527747	RPS8
deep white layer of SC	1/301	0.889952	0.896405	0	0	0.452662	0.0527747	RPS8
diagonal domain	1/301	0.889952	0.896405	0	0	0.452662	0.0527747	PABPC4
diencephalon	1/301	0.889952	0.896405	0	0	0.452662	0.0527747	RGS16
dorsal lateral geniculate nucleus	1/301	0.889952	0.896405	0	0	0.452662	0.0527747	RGS16
dorsal pallium/isocortex	1/301	0.889952	0.896405	0	0	0.452662	0.0527747	DUSP6
dorsal part of CoP	1/301	0.889952	0.896405	0	0	0.452662	0.0527747	RPL27
dorsal peduncular cortex, periventricular part	1/301	0.889952	0.896405	0	0	0.452662	0.0527747	DBI
dorsal spiriform nucleus	1/301	0.889952	0.896405	0	0	0.452662	0.0527747	SDC2
dorsal subnucleus of MG	1/301	0.889952	0.896405	0	0	0.452662	0.0527747	RGS16
dorsal tier of thalamus	1/301	0.889952	0.896405	0	0	0.452662	0.0527747	RGS16
dorsofrontal pretectal nucleus	1/301	0.889952	0.896405	0	0	0.452662	0.0527747	RGS16
dorsolateral (non-cerebellar) part of isA	1/301	0.889952	0.896405	0	0	0.452662	0.0527747	RPS18
dorsolateral IC periaqueductal gray	1/301	0.889952	0.896405	0	0	0.452662	0.0527747	RPS8
dorsolateral TG part of the periaqueductal gray	1/301	0.889952	0.896405	0	0	0.452662	0.0527747	RPS8
dorsolateral part of Int	1/301	0.889952	0.896405	0	0	0.452662	0.0527747	CCL20
dorsolateral part of Lat	1/301	0.889952	0.896405	0	0	0.452662	0.0527747	BTG1
dorsolateral preisthmic part of periaqueductal gray	1/301	0.889952	0.896405	0	0	0.452662	0.0527747	RPS18
entorhinal cortex	1/301	0.889952	0.896405	0	0	0.452662	0.0527747	PLIN2
external part of AOV	1/301	0.889952	0.896405	0	0	0.452662	0.0527747	IL1RN
forebrain	1/301	0.889952	0.896405	0	0	0.452662	0.0527747	DUSP6
hypothalamic amygdala	1/301	0.889952	0.896405	0	0	0.452662	0.0527747	RPS19
intergeniculate leaflet	1/301	0.889952	0.896405	0	0	0.452662	0.0527747	RGS16
intermediate (interpositus) cerebellar nucleus	1/301	0.889952	0.896405	0	0	0.452662	0.0527747	ITGB2
intermediate mantle of isBM	1/301	0.889952	0.896405	0	0	0.452662	0.0527747	SDC2
intermediate part of r2B	1/301	0.889952	0.896405	0	0	0.452662	0.0527747	SPP1
intermediate part of r3B	1/301	0.889952	0.896405	0	0	0.452662	0.0527747	SPP1
intermediate part of r4B	1/301	0.889952	0.896405	0	0	0.452662	0.0527747	SPP1
intermediate part of r5B	1/301	0.889952	0.896405	0	0	0.452662	0.0527747	HSPG2
intermediate part of r6B	1/301	0.889952	0.896405	0	0	0.452662	0.0527747	IL1B
intermediate pretectal nucleus	1/301	0.889952	0.896405	0	0	0.452662	0.0527747	RPL27
intermediate stratum of CoPD	1/301	0.889952	0.896405	0	0	0.452662	0.0527747	RPL27
intermediate stratum of CoPV	1/301	0.889952	0.896405	0	0	0.452662	0.0527747	ATP5G3
intermediate stratum of DTTh	1/301	0.889952	0.896405	0	0	0.452662	0.0527747	RGS16
intermediate stratum of DgSe	1/301	0.889952	0.896405	0	0	0.452662	0.0527747	RPS21
intermediate stratum of JcPV	1/301	0.889952	0.896405	0	0	0.452662	0.0527747	ATP5G3
intermediate stratum of LAP	1/301	0.889952	0.896405	0	0	0.452662	0.0527747	PLAUR
intermediate stratum of Pal	1/301	0.889952	0.896405	0	0	0.452662	0.0527747	ACTN1
intermediate stratum of PcPD	1/301	0.889952	0.896405	0	0	0.452662	0.0527747	RGS16
intermediate stratum of PcPV	1/301	0.889952	0.896405	0	0	0.452662	0.0527747	RGS16
intermediate stratum of RMa	1/301	0.889952	0.896405	0	0	0.452662	0.0527747	IL1RN
intermediate stratum of SeDg	1/301	0.889952	0.896405	0	0	0.452662	0.0527747	RPS21
intermediate stratum of TG	1/301	0.889952	0.896405	0	0	0.452662	0.0527747	RPL27
intermediate stratum of isBI	1/301	0.889952	0.896405	0	0	0.452662	0.0527747	FTH1
intermediate stratum of isBL	1/301	0.889952	0.896405	0	0	0.452662	0.0527747	RPS18
intermediate stratum of isLim	1/301	0.889952	0.896405	0	0	0.452662	0.0527747	TIMP1
intermediate stratum of m1B	1/301	0.889952	0.896405	0	0	0.452662	0.0527747	SPP1
intermediate stratum of m1Lim	1/301	0.889952	0.896405	0	0	0.452662	0.0527747	ITGB2
intermediate stratum of m2B	1/301	0.889952	0.896405	0	0	0.452662	0.0527747	IL1B
intermediate stratum of p1B	1/301	0.889952	0.896405	0	0	0.452662	0.0527747	SDC2
intermediate stratum of p2Lim	1/301	0.889952	0.896405	0	0	0.452662	0.0527747	RGS16
intermediate stratum of r10Tr	1/301	0.889952	0.896405	0	0	0.452662	0.0527747	HMGA1
intermediate stratum of r10Ve	1/301	0.889952	0.896405	0	0	0.452662	0.0527747	MMP14
intermediate stratum of r1BM	1/301	0.889952	0.896405	0	0	0.452662	0.0527747	SDC2
intermediate stratum of r1Tr	1/301	0.889952	0.896405	0	0	0.452662	0.0527747	RPS18
intermediate stratum of r1Ve	1/301	0.889952	0.896405	0	0	0.452662	0.0527747	SPP1
intermediate stratum of r2BL	1/301	0.889952	0.896405	0	0	0.452662	0.0527747	SPP1
intermediate stratum of r2Ve	1/301	0.889952	0.896405	0	0	0.452662	0.0527747	SPP1
intermediate stratum of r3BI	1/301	0.889952	0.896405	0	0	0.452662	0.0527747	SPP1
intermediate stratum of r3BL	1/301	0.889952	0.896405	0	0	0.452662	0.0527747	SPP1
intermediate stratum of r3Lim	1/301	0.889952	0.896405	0	0	0.452662	0.0527747	LCP1
intermediate stratum of r4BI	1/301	0.889952	0.896405	0	0	0.452662	0.0527747	SPP1
intermediate stratum of r5BI	1/301	0.889952	0.896405	0	0	0.452662	0.0527747	HSPG2
intermediate stratum of r5Tr	1/301	0.889952	0.896405	0	0	0.452662	0.0527747	RPL37
intermediate stratum of r7Tr	1/301	0.889952	0.896405	0	0	0.452662	0.0527747	TAGLN2
intermediate stratum of r8Tr	1/301	0.889952	0.896405	0	0	0.452662	0.0527747	ZMPSTE24
intermediate stratum of r9BM	1/301	0.889952	0.896405	0	0	0.452662	0.0527747	GDF15
intermediate stratum of r9Lim	1/301	0.889952	0.896405	0	0	0.452662	0.0527747	ZMPSTE24
intermediate stratum of r9Tr	1/301	0.889952	0.896405	0	0	0.452662	0.0527747	ZMPSTE24
intermediate stratum of r9Ve	1/301	0.889952	0.896405	0	0	0.452662	0.0527747	IL1B
intermediate stratum of the VAP	1/301	0.889952	0.896405	0	0	0.452662	0.0527747	YWHAB
intermediate white layer of SC	1/301	0.889952	0.896405	0	0	0.452662	0.0527747	RPL27
internal cortical nucleus of inferior colliculus	1/301	0.889952	0.896405	0	0	0.452662	0.0527747	S100A6
internal granular layer of CbHCx	1/301	0.889952	0.896405	0	0	0.452662	0.0527747	BTG1
internal granular layer of CbVCx	1/301	0.889952	0.896405	0	0	0.452662	0.0527747	BTG1
intralaminar nuclei	1/301	0.889952	0.896405	0	0	0.452662	0.0527747	RGS16
isthmic alar plate	1/301	0.889952	0.896405	0	0	0.452662	0.0527747	BTG1
isthmic basal plate	1/301	0.889952	0.896405	0	0	0.452662	0.0527747	SDC2
isthmic part of basolateral isthmic reticular formation	1/301	0.889952	0.896405	0	0	0.452662	0.0527747	RPS18
isthmic part of the intermediate lateral lemniscal nucleus	1/301	0.889952	0.896405	0	0	0.452662	0.0527747	IL1RN
isthmic portion of paranigral nucleus	1/301	0.889952	0.896405	0	0	0.452662	0.0527747	SDC2
isthmus	1/301	0.889952	0.896405	0	0	0.452662	0.0527747	BTG1
isthmus proper	1/301	0.889952	0.896405	0	0	0.452662	0.0527747	S100A6
lateral (parvicellular) part of MD	1/301	0.889952	0.896405	0	0	0.452662	0.0527747	RGS16
lateral TG part of the periaqueductal gray	1/301	0.889952	0.896405	0	0	0.452662	0.0527747	RPS8
lateral amygdaloid nucleus	1/301	0.889952	0.896405	0	0	0.452662	0.0527747	DBI
lateral parabrachial nucleus	1/301	0.889952	0.896405	0	0	0.452662	0.0527747	PRDX1
lateral part of Med	1/301	0.889952	0.896405	0	0	0.452662	0.0527747	BTG1
lateral part of alar p2	1/301	0.889952	0.896405	0	0	0.452662	0.0527747	RGS16
lateral part of m2A	1/301	0.889952	0.896405	0	0	0.452662	0.0527747	RPS8
lateral part of r2B	1/301	0.889952	0.896405	0	0	0.452662	0.0527747	SPP1
lateral part of the isB	1/301	0.889952	0.896405	0	0	0.452662	0.0527747	SDC2
lateral periretromammillary nucleus	1/301	0.889952	0.896405	0	0	0.452662	0.0527747	PABPC4
lateral septal nucleus, intermedio-ventral part	1/301	0.889952	0.896405	0	0	0.452662	0.0527747	RPS21
lateral terminal nucleus of the accessory optic tract, ventral part	1/301	0.889952	0.896405	0	0	0.452662	0.0527747	TIMP1
lateral trapezoid nucleus	1/301	0.889952	0.896405	0	0	0.452662	0.0527747	HSPG2
lateral tuberal nucleus	1/301	0.889952	0.896405	0	0	0.452662	0.0527747	GRN
lateropallial prepiriform area	1/301	0.889952	0.896405	0	0	0.452662	0.0527747	TYROBP
layer 1 of AOV cortex	1/301	0.889952	0.896405	0	0	0.452662	0.0527747	IL1RN
layer 1 of OCx	1/301	0.889952	0.896405	0	0	0.452662	0.0527747	DUSP6
layer 1 of PCx	1/301	0.889952	0.896405	0	0	0.452662	0.0527747	DUSP6
layer 1 of PaS	1/301	0.889952	0.896405	0	0	0.452662	0.0527747	GDF15
layer 1 of PrS	1/301	0.889952	0.896405	0	0	0.452662	0.0527747	GDF15
layer 1 of RSC	1/301	0.889952	0.896405	0	0	0.452662	0.0527747	PLIN2
layer 1 of VPrP cortex	1/301	0.889952	0.896405	0	0	0.452662	0.0527747	TYROBP
layer 2 of ERCx	1/301	0.889952	0.896405	0	0	0.452662	0.0527747	PLIN2
layer 2 of LOT	1/301	0.889952	0.896405	0	0	0.452662	0.0527747	IL1B
layer 2 of LPrP cortex	1/301	0.889952	0.896405	0	0	0.452662	0.0527747	TYROBP
layer 2 of PCx	1/301	0.889952	0.896405	0	0	0.452662	0.0527747	DUSP6
layer 2 of PaS	1/301	0.889952	0.896405	0	0	0.452662	0.0527747	GDF15
layer 2 of PrS	1/301	0.889952	0.896405	0	0	0.452662	0.0527747	B2M
layer 2 of RSC	1/301	0.889952	0.896405	0	0	0.452662	0.0527747	PLIN2
layer 2 of VPrP cortex	1/301	0.889952	0.896405	0	0	0.452662	0.0527747	TYROBP
layer 3 of AOD cortex	1/301	0.889952	0.896405	0	0	0.452662	0.0527747	IL1RN
layer 3 of CCx	1/301	0.889952	0.896405	0	0	0.452662	0.0527747	DUSP6
layer 3 of ERCx	1/301	0.889952	0.896405	0	0	0.452662	0.0527747	PLIN2
layer 3 of LOT	1/301	0.889952	0.896405	0	0	0.452662	0.0527747	MMP9
layer 3 of LPrP cortex	1/301	0.889952	0.896405	0	0	0.452662	0.0527747	TYROBP
layer 3 of PCx	1/301	0.889952	0.896405	0	0	0.452662	0.0527747	DUSP6
layer 3 of VPrP cortex	1/301	0.889952	0.896405	0	0	0.452662	0.0527747	TYROBP
layer 4 of CCx	1/301	0.889952	0.896405	0	0	0.452662	0.0527747	DUSP6
layer 4 of ERCx	1/301	0.889952	0.896405	0	0	0.452662	0.0527747	PLIN2
layer 4 of PCx	1/301	0.889952	0.896405	0	0	0.452662	0.0527747	LASP1
layer 4 of PaS	1/301	0.889952	0.896405	0	0	0.452662	0.0527747	PLAUR
layer 5 of ERCx	1/301	0.889952	0.896405	0	0	0.452662	0.0527747	PLIN2
layer 5 of PCx	1/301	0.889952	0.896405	0	0	0.452662	0.0527747	LASP1
layer 5 of PRh-Ect	1/301	0.889952	0.896405	0	0	0.452662	0.0527747	PLAUR
layer 5 of PaS	1/301	0.889952	0.896405	0	0	0.452662	0.0527747	CAP1
layer 5 of RSC	1/301	0.889952	0.896405	0	0	0.452662	0.0527747	YWHAB
layer 6 of CCx	1/301	0.889952	0.896405	0	0	0.452662	0.0527747	DUSP6
layer 6 of RSC	1/301	0.889952	0.896405	0	0	0.452662	0.0527747	CAP1
layer 6b of RSC	1/301	0.889952	0.896405	0	0	0.452662	0.0527747	CAP1
liminal nucleus	1/301	0.889952	0.896405	0	0	0.452662	0.0527747	RGS16
liminal part of alar isthmus	1/301	0.889952	0.896405	0	0	0.452662	0.0527747	RPS6
liminal part of alar p2	1/301	0.889952	0.896405	0	0	0.452662	0.0527747	RGS16
liminal part of the r10 alar plate	1/301	0.889952	0.896405	0	0	0.452662	0.0527747	MSN
lower dorsal perifornical nucleus	1/301	0.889952	0.896405	0	0	0.452662	0.0527747	RPS21
m1B part of the periaqueductal gray	1/301	0.889952	0.896405	0	0	0.452662	0.0527747	FAU
m1Lim (VL) part of the periaqueductal gray	1/301	0.889952	0.896405	0	0	0.452662	0.0527747	RPL30
m1Lim part of the midbrain reticular formation	1/301	0.889952	0.896405	0	0	0.452662	0.0527747	ITGB2
m2 basal plate	1/301	0.889952	0.896405	0	0	0.452662	0.0527747	SDC2
m2 part of pararubral nucleus	1/301	0.889952	0.896405	0	0	0.452662	0.0527747	IL1B
magnocellular superficial hypothalamic nucleus	1/301	0.889952	0.896405	0	0	0.452662	0.0527747	GRN
mantle zone of AHy	1/301	0.889952	0.896405	0	0	0.452662	0.0527747	RPS19
mantle zone of AStr	1/301	0.889952	0.896405	0	0	0.452662	0.0527747	ITGB2
mantle zone of CCx	1/301	0.889952	0.896405	0	0	0.452662	0.0527747	DUSP6
mantle zone of CbH	1/301	0.889952	0.896405	0	0	0.452662	0.0527747	BTG1
mantle zone of CoPD	1/301	0.889952	0.896405	0	0	0.452662	0.0527747	RPL27
mantle zone of DTTh	1/301	0.889952	0.896405	0	0	0.452662	0.0527747	RGS16
mantle zone of ERCx	1/301	0.889952	0.896405	0	0	0.452662	0.0527747	PLIN2
mantle zone of IC	1/301	0.889952	0.896405	0	0	0.452662	0.0527747	S100A6
mantle zone of Ist	1/301	0.889952	0.896405	0	0	0.452662	0.0527747	S100A6
mantle zone of JcPV	1/301	0.889952	0.896405	0	0	0.452662	0.0527747	ATP5G3
mantle zone of LAP	1/301	0.889952	0.896405	0	0	0.452662	0.0527747	LCP1
mantle zone of LPrP	1/301	0.889952	0.896405	0	0	0.452662	0.0527747	TYROBP
mantle zone of PCx	1/301	0.889952	0.896405	0	0	0.452662	0.0527747	DUSP6
mantle zone of Pal	1/301	0.889952	0.896405	0	0	0.452662	0.0527747	ACTN1
mantle zone of PcPV	1/301	0.889952	0.896405	0	0	0.452662	0.0527747	RGS16
mantle zone of S	1/301	0.889952	0.896405	0	0	0.452662	0.0527747	YWHAB
mantle zone of VPrP	1/301	0.889952	0.896405	0	0	0.452662	0.0527747	TYROBP
mantle zone of VTTh	1/301	0.889952	0.896405	0	0	0.452662	0.0527747	RGS16
mantle zone of cerebellar vermis	1/301	0.889952	0.896405	0	0	0.452662	0.0527747	BTG1
mantle zone of isLim	1/301	0.889952	0.896405	0	0	0.452662	0.0527747	RPS6
mantle zone of m2AL	1/301	0.889952	0.896405	0	0	0.452662	0.0527747	RPS8
mantle zone of m2B	1/301	0.889952	0.896405	0	0	0.452662	0.0527747	SDC2
mantle zone of p1B	1/301	0.889952	0.896405	0	0	0.452662	0.0527747	SDC2
mantle zone of p2Lim	1/301	0.889952	0.896405	0	0	0.452662	0.0527747	RGS16
mantle zone of r10Lim	1/301	0.889952	0.896405	0	0	0.452662	0.0527747	MSN
mantle zone of r11Tr	1/301	0.889952	0.896405	0	0	0.452662	0.0527747	MMP14
mantle zone of r1BM	1/301	0.889952	0.896405	0	0	0.452662	0.0527747	SDC2
mantle zone of r1Ve	1/301	0.889952	0.896405	0	0	0.452662	0.0527747	SPP1
mantle zone of r2BI	1/301	0.889952	0.896405	0	0	0.452662	0.0527747	SPP1
mantle zone of r2BL	1/301	0.889952	0.896405	0	0	0.452662	0.0527747	SPP1
mantle zone of r2BM	1/301	0.889952	0.896405	0	0	0.452662	0.0527747	SPP1
mantle zone of r2Tr	1/301	0.889952	0.896405	0	0	0.452662	0.0527747	SPP1
mantle zone of r2Ve	1/301	0.889952	0.896405	0	0	0.452662	0.0527747	SPP1
mantle zone of r3BI	1/301	0.889952	0.896405	0	0	0.452662	0.0527747	SPP1
mantle zone of r5BI	1/301	0.889952	0.896405	0	0	0.452662	0.0527747	HSPG2
mantle zone of r5Tr	1/301	0.889952	0.896405	0	0	0.452662	0.0527747	PRDX1
mantle zone of r6BI	1/301	0.889952	0.896405	0	0	0.452662	0.0527747	IL1B
mantle zone of r6Ve	1/301	0.889952	0.896405	0	0	0.452662	0.0527747	ITGB2
mantle zone of r7Co	1/301	0.889952	0.896405	0	0	0.452662	0.0527747	MMP14
mantle zone of r7Tr	1/301	0.889952	0.896405	0	0	0.452662	0.0527747	TAGLN2
mantle zone of r7Ve	1/301	0.889952	0.896405	0	0	0.452662	0.0527747	ITGB2
mantle zone of r9Tr	1/301	0.889952	0.896405	0	0	0.452662	0.0527747	TAGLN2
medial (magnocellular) part of MD	1/301	0.889952	0.896405	0	0	0.452662	0.0527747	RGS16
medial amygdala, anterodorsal part	1/301	0.889952	0.896405	0	0	0.452662	0.0527747	RPS19
medial amygdala, posteroventral part	1/301	0.889952	0.896405	0	0	0.452662	0.0527747	LAPTM5
medial basal reticular formation of m1	1/301	0.889952	0.896405	0	0	0.452662	0.0527747	IL1B
medial part of r1B	1/301	0.889952	0.896405	0	0	0.452662	0.0527747	SDC2
medial part of r2B	1/301	0.889952	0.896405	0	0	0.452662	0.0527747	SPP1
medial pretectal nucleus	1/301	0.889952	0.896405	0	0	0.452662	0.0527747	RPL27
medial tuberal nucleus	1/301	0.889952	0.896405	0	0	0.452662	0.0527747	PABPC4
mediodorsal nucleus	1/301	0.889952	0.896405	0	0	0.452662	0.0527747	RGS16
molecular layer of CbHCx	1/301	0.889952	0.896405	0	0	0.452662	0.0527747	BTG1
molecular layer of CbVCx	1/301	0.889952	0.896405	0	0	0.452662	0.0527747	BTG1
nucleus of Barrington	1/301	0.889952	0.896405	0	0	0.452662	0.0527747	PLIN2
nucleus of the inferior collicular brachium, rostral part	1/301	0.889952	0.896405	0	0	0.452662	0.0527747	GRN
oculomotor nucleus, Edinger-Westphal subnucleus	1/301	0.889952	0.896405	0	0	0.452662	0.0527747	FAU
p1 part of parabrachial pigmented nucleus	1/301	0.889952	0.896405	0	0	0.452662	0.0527747	SDC2
p1 part of the pararubral nucleus	1/301	0.889952	0.896405	0	0	0.452662	0.0527747	SPP1
p1 part of the substantia nigra compacta	1/301	0.889952	0.896405	0	0	0.452662	0.0527747	SDC2
p1Lim part of periaqueductal gray	1/301	0.889952	0.896405	0	0	0.452662	0.0527747	ATP5G3
p2 portion of the parabrachial pigmented nucleus	1/301	0.889952	0.896405	0	0	0.452662	0.0527747	SDC2
p2 portion of the substantia nigra pars compacta	1/301	0.889952	0.896405	0	0	0.452662	0.0527747	SDC2
p3 portion of parabrachial pigmented nucleus	1/301	0.889952	0.896405	0	0	0.452662	0.0527747	SDC2
p3 portion of the substantia nigra pars compacta	1/301	0.889952	0.896405	0	0	0.452662	0.0527747	SDC2
pallidal islands of Calleja	1/301	0.889952	0.896405	0	0	0.452662	0.0527747	PABPC4
pallidum (globus pallidus complex)	1/301	0.889952	0.896405	0	0	0.452662	0.0527747	ACTN1
parabrachial part of the periaqueductal gray	1/301	0.889952	0.896405	0	0	0.452662	0.0527747	RPS18
parasubthalamic nucleus (migrated)	1/301	0.889952	0.896405	0	0	0.452662	0.0527747	PABPC4
parietal cortex	1/301	0.889952	0.896405	0	0	0.452662	0.0527747	DUSP6
periventricular stratum of AStr	1/301	0.889952	0.896405	0	0	0.452662	0.0527747	ITGB2
periventricular stratum of CbH	1/301	0.889952	0.896405	0	0	0.452662	0.0527747	BTG1
periventricular stratum of CoPV	1/301	0.889952	0.896405	0	0	0.452662	0.0527747	RPL27A
periventricular stratum of Dg	1/301	0.889952	0.896405	0	0	0.452662	0.0527747	RAB31
periventricular stratum of IC	1/301	0.889952	0.896405	0	0	0.452662	0.0527747	RPS8
periventricular stratum of JcPV	1/301	0.889952	0.896405	0	0	0.452662	0.0527747	RPL27A
periventricular stratum of RtC	1/301	0.889952	0.896405	0	0	0.452662	0.0527747	TIMP1
periventricular stratum of SC	1/301	0.889952	0.896405	0	0	0.452662	0.0527747	RPS8
periventricular stratum of TG	1/301	0.889952	0.896405	0	0	0.452662	0.0527747	RPS8
periventricular stratum of TPaA	1/301	0.889952	0.896405	0	0	0.452662	0.0527747	RGS16
periventricular stratum of TTe	1/301	0.889952	0.896405	0	0	0.452662	0.0527747	DBI
periventricular stratum of m1B	1/301	0.889952	0.896405	0	0	0.452662	0.0527747	FAU
periventricular stratum of m1Lim	1/301	0.889952	0.896405	0	0	0.452662	0.0527747	RPL30
periventricular stratum of m2ADL	1/301	0.889952	0.896405	0	0	0.452662	0.0527747	RPS18
periventricular stratum of p1Lim	1/301	0.889952	0.896405	0	0	0.452662	0.0527747	ATP5G3
periventricular stratum of p2Lim	1/301	0.889952	0.896405	0	0	0.452662	0.0527747	RGS16
periventricular stratum of r10BM	1/301	0.889952	0.896405	0	0	0.452662	0.0527747	MSN
periventricular stratum of r1BM	1/301	0.889952	0.896405	0	0	0.452662	0.0527747	RPL37A
periventricular stratum of r2BM	1/301	0.889952	0.896405	0	0	0.452662	0.0527747	YBX1
periventricular stratum of r2Lim	1/301	0.889952	0.896405	0	0	0.452662	0.0527747	PLIN2
periventricular stratum of r2Ve	1/301	0.889952	0.896405	0	0	0.452662	0.0527747	DBI
periventricular stratum of r3Lim	1/301	0.889952	0.896405	0	0	0.452662	0.0527747	PLIN2
periventricular stratum of r5BM	1/301	0.889952	0.896405	0	0	0.452662	0.0527747	GDF15
periventricular stratum of r5Ve	1/301	0.889952	0.896405	0	0	0.452662	0.0527747	ITGB2
periventricular stratum of r6Ve	1/301	0.889952	0.896405	0	0	0.452662	0.0527747	ITGB2
periventricular stratum of r7Ve	1/301	0.889952	0.896405	0	0	0.452662	0.0527747	ITGB2
periventricular stratum of r8BM	1/301	0.889952	0.896405	0	0	0.452662	0.0527747	FAU
periventricular stratum of the PBC	1/301	0.889952	0.896405	0	0	0.452662	0.0527747	RPS18
plexiform layer of TuPal	1/301	0.889952	0.896405	0	0	0.452662	0.0527747	LAPTM5
plexiform layer of TuStr	1/301	0.889952	0.896405	0	0	0.452662	0.0527747	YBX1
polymorph layer of TuStr	1/301	0.889952	0.896405	0	0	0.452662	0.0527747	YBX1
posterior tegmental nucleus	1/301	0.889952	0.896405	0	0	0.452662	0.0527747	SDC2
posterior triangular nucleus	1/301	0.889952	0.896405	0	0	0.452662	0.0527747	RGS16
posterodorsal tegmental nucleus	1/301	0.889952	0.896405	0	0	0.452662	0.0527747	YBX1
posterolateral cortical amygdaloid area	1/301	0.889952	0.896405	0	0	0.452662	0.0527747	PLIN2
pregeniculate nucleus	1/301	0.889952	0.896405	0	0	0.452662	0.0527747	RGS16
preisthmic tegmentum	1/301	0.889952	0.896405	0	0	0.452662	0.0527747	SDC2
prepontine hindbrain	1/301	0.889952	0.896405	0	0	0.452662	0.0527747	BTG1
pretectal tegmentum	1/301	0.889952	0.896405	0	0	0.452662	0.0527747	SDC2
principal pretectal nucleus	1/301	0.889952	0.896405	0	0	0.452662	0.0527747	RPL27
prosomere 2	1/301	0.889952	0.896405	0	0	0.452662	0.0527747	RGS16
pterigoid muscle trigeminal motor cell group	1/301	0.889952	0.896405	0	0	0.452662	0.0527747	MSN
r1 alar plate	1/301	0.889952	0.896405	0	0	0.452662	0.0527747	BTG1
r1 part of basomedial reticular formation	1/301	0.889952	0.896405	0	0	0.452662	0.0527747	SPP1
r1 part of dorsal parvicellular reticular formation	1/301	0.889952	0.896405	0	0	0.452662	0.0527747	RPS18
r1 part of dorsal raphe nucleus	1/301	0.889952	0.896405	0	0	0.452662	0.0527747	RPL37A
r1 part of intermediate nucleus of the lateral lemniscus	1/301	0.889952	0.896405	0	0	0.452662	0.0527747	IL1RN
r1 part of superior vestibular nucleus	1/301	0.889952	0.896405	0	0	0.452662	0.0527747	SPP1
r1 part of vestibular sensory column	1/301	0.889952	0.896405	0	0	0.452662	0.0527747	SPP1
r10 part of dorsal parvicellular reticular formation	1/301	0.889952	0.896405	0	0	0.452662	0.0527747	HMGA1
r10 part of spinal vestibular nucleus	1/301	0.889952	0.896405	0	0	0.452662	0.0527747	MMP14
r10 portion of the hypoglossal motor nucleus	1/301	0.889952	0.896405	0	0	0.452662	0.0527747	MSN
r11 part of spinal trigeminal nucleus, caudal part	1/301	0.889952	0.896405	0	0	0.452662	0.0527747	MMP14
r11 part of the trigeminal column	1/301	0.889952	0.896405	0	0	0.452662	0.0527747	MMP14
r2 alar plate	1/301	0.889952	0.896405	0	0	0.452662	0.0527747	SPP1
r2 basal plate	1/301	0.889952	0.896405	0	0	0.452662	0.0527747	SPP1
r2 liminal central gray	1/301	0.889952	0.896405	0	0	0.452662	0.0527747	PLIN2
r2 part of basointermediate reticular formation	1/301	0.889952	0.896405	0	0	0.452662	0.0527747	SPP1
r2 part of basomedial reticular formation	1/301	0.889952	0.896405	0	0	0.452662	0.0527747	SPP1
r2 part of nucleus subcoeruleus	1/301	0.889952	0.896405	0	0	0.452662	0.0527747	HMGA1
r2 part of prepontine raphe nucleus	1/301	0.889952	0.896405	0	0	0.452662	0.0527747	SPP1
r2 part of superior vestibular nucleus	1/301	0.889952	0.896405	0	0	0.452662	0.0527747	SPP1
r2 part of the trigeminal motor nucleus	1/301	0.889952	0.896405	0	0	0.452662	0.0527747	MSN
r2 part of trigeminal sensory column	1/301	0.889952	0.896405	0	0	0.452662	0.0527747	SPP1
r2 part of vestibular nucleus Y	1/301	0.889952	0.896405	0	0	0.452662	0.0527747	DBI
r2 part of vestibular sensory column	1/301	0.889952	0.896405	0	0	0.452662	0.0527747	SPP1
r3 alar plate	1/301	0.889952	0.896405	0	0	0.452662	0.0527747	SPP1
r3 liminal central gray	1/301	0.889952	0.896405	0	0	0.452662	0.0527747	PLIN2
r3 part of anteroventral cochlear nucleus	1/301	0.889952	0.896405	0	0	0.452662	0.0527747	PLIN2
r3 part of basointermediate reticular formation	1/301	0.889952	0.896405	0	0	0.452662	0.0527747	SPP1
r3 part of basolateral reticular formation	1/301	0.889952	0.896405	0	0	0.452662	0.0527747	SPP1
r3 part of basomedial reticular formation	1/301	0.889952	0.896405	0	0	0.452662	0.0527747	SPP1
r3 part of ventral parvicellular reticular formation	1/301	0.889952	0.896405	0	0	0.452662	0.0527747	LCP1
r3 pontine raphe nucleus	1/301	0.889952	0.896405	0	0	0.452662	0.0527747	SPP1
r3 roof plate	1/301	0.889952	0.896405	0	0	0.452662	0.0527747	RPL27
r4 part of basointermediate reticular formation	1/301	0.889952	0.896405	0	0	0.452662	0.0527747	SPP1
r4 part of descending trigeminal sensory nucleus, oral part	1/301	0.889952	0.896405	0	0	0.452662	0.0527747	LAPTM5
r4 part of lateral pontine nuclei	1/301	0.889952	0.896405	0	0	0.452662	0.0527747	NRG4
r4 part of medial paralemniscal nucleus	1/301	0.889952	0.896405	0	0	0.452662	0.0527747	SPP1
r5 part of basointermediate reticular formation	1/301	0.889952	0.896405	0	0	0.452662	0.0527747	HSPG2
r5 part of dorsal parvicellular reticular formation	1/301	0.889952	0.896405	0	0	0.452662	0.0527747	RPL37
r5 part of parvocellular medial vestibular nucleus	1/301	0.889952	0.896405	0	0	0.452662	0.0527747	ITGB2
r5 part of the oral Sp5 subnucleus	1/301	0.889952	0.896405	0	0	0.452662	0.0527747	LAPTM5
r5 part of the trigeminal column	1/301	0.889952	0.896405	0	0	0.452662	0.0527747	PRDX1
r6 part of basomedial reticular formation	1/301	0.889952	0.896405	0	0	0.452662	0.0527747	SPP1
r6 part of parvocellular medial vestibular nucleus	1/301	0.889952	0.896405	0	0	0.452662	0.0527747	ITGB2
r6 part of spinal trigeminal nucleus, pars oralis	1/301	0.889952	0.896405	0	0	0.452662	0.0527747	LAPTM5
r6 part of spinal vestibular nucleus	1/301	0.889952	0.896405	0	0	0.452662	0.0527747	MMP14
r6 part of the vestibular column	1/301	0.889952	0.896405	0	0	0.452662	0.0527747	ITGB2
r6 part of ventral gigangocellular reticular area	1/301	0.889952	0.896405	0	0	0.452662	0.0527747	IL1B
r7 alar plate	1/301	0.889952	0.896405	0	0	0.452662	0.0527747	TAGLN2
r7 part of basomedial reticular formation	1/301	0.889952	0.896405	0	0	0.452662	0.0527747	SPP1
r7 part of cochlear column	1/301	0.889952	0.896405	0	0	0.452662	0.0527747	MMP14
r7 part of dorsal parvicellular reticular formation	1/301	0.889952	0.896405	0	0	0.452662	0.0527747	ZMPSTE24
r7 part of nucleus prepositus	1/301	0.889952	0.896405	0	0	0.452662	0.0527747	FAU
r7 part of paragigantocellular nucleus	1/301	0.889952	0.896405	0	0	0.452662	0.0527747	FCER1G
r7 part of parvocellular medial vestibular nucleus	1/301	0.889952	0.896405	0	0	0.452662	0.0527747	ITGB2
r7 part of the nucleus of Roller	1/301	0.889952	0.896405	0	0	0.452662	0.0527747	TIMP1
r7 part of the trigeminal column	1/301	0.889952	0.896405	0	0	0.452662	0.0527747	TAGLN2
r7 part of the vestibular column	1/301	0.889952	0.896405	0	0	0.452662	0.0527747	ITGB2
r7 part of trigeminal transition zone	1/301	0.889952	0.896405	0	0	0.452662	0.0527747	TAGLN2
r8 part of dorsal parvicellular reticular formation	1/301	0.889952	0.896405	0	0	0.452662	0.0527747	ZMPSTE24
r8 part of gigantocellular reticular area	1/301	0.889952	0.896405	0	0	0.452662	0.0527747	GDF15
r8 part of inferior olive	1/301	0.889952	0.896405	0	0	0.452662	0.0527747	RPL27
r8 part of linear nucleus	1/301	0.889952	0.896405	0	0	0.452662	0.0527747	HLA-A
r8 portion of ambiguous motor nucleus	1/301	0.889952	0.896405	0	0	0.452662	0.0527747	IER3
r9 alar plate	1/301	0.889952	0.896405	0	0	0.452662	0.0527747	TAGLN2
r9 part of gigantocellular reticular area	1/301	0.889952	0.896405	0	0	0.452662	0.0527747	GDF15
r9 part of nucleus of Roller	1/301	0.889952	0.896405	0	0	0.452662	0.0527747	GDF15
r9 part of spinal vestibular nucleus	1/301	0.889952	0.896405	0	0	0.452662	0.0527747	IL1B
r9 part of the trigeminal column	1/301	0.889952	0.896405	0	0	0.452662	0.0527747	TAGLN2
r9 part of trigeminal transition zone	1/301	0.889952	0.896405	0	0	0.452662	0.0527747	ZMPSTE24
r9 part of ventral parvicellular reticular formation	1/301	0.889952	0.896405	0	0	0.452662	0.0527747	ZMPSTE24
r9 portion of ambiguous motor nucleus (postmigratory)	1/301	0.889952	0.896405	0	0	0.452662	0.0527747	S100A4
r9 portion of the hypoglossal motor nucleus	1/301	0.889952	0.896405	0	0	0.452662	0.0527747	MSN
red nucleus, parvicellular part	1/301	0.889952	0.896405	0	0	0.452662	0.0527747	SDC2
reticular formation of CoPD	1/301	0.889952	0.896405	0	0	0.452662	0.0527747	LAPTM5
reticular formation of p2Lim	1/301	0.889952	0.896405	0	0	0.452662	0.0527747	RGS16
retrohypothalamic nucleus	1/301	0.889952	0.896405	0	0	0.452662	0.0527747	TIMP1
retromammillary area, lateral part	1/301	0.889952	0.896405	0	0	0.452662	0.0527747	IL1RN
rhombomere 1	1/301	0.889952	0.896405	0	0	0.452662	0.0527747	BTG1
rhombomere 10	1/301	0.889952	0.896405	0	0	0.452662	0.0527747	MSN
rhombomere 11	1/301	0.889952	0.896405	0	0	0.452662	0.0527747	TIMP1
rhombomere 2	1/301	0.889952	0.896405	0	0	0.452662	0.0527747	SPP1
rhombomere 4	1/301	0.889952	0.896405	0	0	0.452662	0.0527747	SPP1
rhombomere 7	1/301	0.889952	0.896405	0	0	0.452662	0.0527747	NRG4
root	1/301	0.889952	0.896405	0	0	0.452662	0.0527747	DUSP6
rostral paraventricular nucleus	1/301	0.889952	0.896405	0	0	0.452662	0.0527747	RGS16
septopallidal core nucleus	1/301	0.889952	0.896405	0	0	0.452662	0.0527747	ACTN1
shell of SCH	1/301	0.889952	0.896405	0	0	0.452662	0.0527747	MMP9
striatal amygdala	1/301	0.889952	0.896405	0	0	0.452662	0.0527747	ITGB2
striatal part of olfactory tuberculum	1/301	0.889952	0.896405	0	0	0.452662	0.0527747	YBX1
sublayer 6a of CCx	1/301	0.889952	0.896405	0	0	0.452662	0.0527747	DUSP6
sublayer 6b of FCx	1/301	0.889952	0.896405	0	0	0.452662	0.0527747	TMED9
sublayer 6b of PCx	1/301	0.889952	0.896405	0	0	0.452662	0.0527747	YWHAB
submedius thalamic nucleus	1/301	0.889952	0.896405	0	0	0.452662	0.0527747	RGS16
subpretectal nucleus	1/301	0.889952	0.896405	0	0	0.452662	0.0527747	ATP5G3
substantia innominata/basal nucleus	1/301	0.889952	0.896405	0	0	0.452662	0.0527747	RPS19
substantia innominata/basal nucleus, transitional part	1/301	0.889952	0.896405	0	0	0.452662	0.0527747	RPS21
substantia nigra compacta, isthmic part	1/301	0.889952	0.896405	0	0	0.452662	0.0527747	SDC2
substantia nigra compacta, m1 part	1/301	0.889952	0.896405	0	0	0.452662	0.0527747	SDC2
subthalamic nucleus (migrated)	1/301	0.889952	0.896405	0	0	0.452662	0.0527747	RAB31
superficial mantle of isBM	1/301	0.889952	0.896405	0	0	0.452662	0.0527747	SDC2
superficial stratum of AHy	1/301	0.889952	0.896405	0	0	0.452662	0.0527747	RPS19
superficial stratum of CCx (cortical plate/marginal zone)	1/301	0.889952	0.896405	0	0	0.452662	0.0527747	DUSP6
superficial stratum of CoPV	1/301	0.889952	0.896405	0	0	0.452662	0.0527747	TIMP1
superficial stratum of DTTh	1/301	0.889952	0.896405	0	0	0.452662	0.0527747	RGS16
superficial stratum of ERCx (cortical plate/marginal zone)	1/301	0.889952	0.896405	0	0	0.452662	0.0527747	PLIN2
superficial stratum of IC	1/301	0.889952	0.896405	0	0	0.452662	0.0527747	S100A6
superficial stratum of ITTh	1/301	0.889952	0.896405	0	0	0.452662	0.0527747	RGS16
superficial stratum of Ist	1/301	0.889952	0.896405	0	0	0.452662	0.0527747	S100A6
superficial stratum of LPrP	1/301	0.889952	0.896405	0	0	0.452662	0.0527747	TYROBP
superficial stratum of Mam	1/301	0.889952	0.896405	0	0	0.452662	0.0527747	PABPC4
superficial stratum of PCx (cortical plate/marginal zone)	1/301	0.889952	0.896405	0	0	0.452662	0.0527747	DUSP6
superficial stratum of PHyB-D	1/301	0.889952	0.896405	0	0	0.452662	0.0527747	GRN
superficial stratum of PHyB-I	1/301	0.889952	0.896405	0	0	0.452662	0.0527747	RAB31
superficial stratum of PHyB-P	1/301	0.889952	0.896405	0	0	0.452662	0.0527747	PABPC4
superficial stratum of PO2	1/301	0.889952	0.896405	0	0	0.452662	0.0527747	RGS16
superficial stratum of RtC	1/301	0.889952	0.896405	0	0	0.452662	0.0527747	MSN
superficial stratum of Str	1/301	0.889952	0.896405	0	0	0.452662	0.0527747	YBX1
superficial stratum of THyB-I	1/301	0.889952	0.896405	0	0	0.452662	0.0527747	PABPC4
superficial stratum of THyB-V	1/301	0.889952	0.896405	0	0	0.452662	0.0527747	FCER1G
superficial stratum of TSPaA	1/301	0.889952	0.896405	0	0	0.452662	0.0527747	MMP9
superficial stratum of VPrP	1/301	0.889952	0.896405	0	0	0.452662	0.0527747	TYROBP
superficial stratum of cerebellar hemisphere	1/301	0.889952	0.896405	0	0	0.452662	0.0527747	BTG1
superficial stratum of cerebellar vermis	1/301	0.889952	0.896405	0	0	0.452662	0.0527747	BTG1
superficial stratum of m1B	1/301	0.889952	0.896405	0	0	0.452662	0.0527747	SDC2
superficial stratum of p2ZL	1/301	0.889952	0.896405	0	0	0.452662	0.0527747	RGS16
superficial stratum of p3ZL	1/301	0.889952	0.896405	0	0	0.452662	0.0527747	RGS16
superficial stratum of r11Tr	1/301	0.889952	0.896405	0	0	0.452662	0.0527747	MMP14
superficial stratum of r1BL	1/301	0.889952	0.896405	0	0	0.452662	0.0527747	IL1RN
superficial stratum of r2Lim	1/301	0.889952	0.896405	0	0	0.452662	0.0527747	MSN
superficial stratum of r3Co	1/301	0.889952	0.896405	0	0	0.452662	0.0527747	PLIN2
superficial stratum of r4BI	1/301	0.889952	0.896405	0	0	0.452662	0.0527747	NRG4
superficial stratum of r4Tr	1/301	0.889952	0.896405	0	0	0.452662	0.0527747	LAPTM5
superficial stratum of r5BI	1/301	0.889952	0.896405	0	0	0.452662	0.0527747	HSPG2
superficial stratum of r5Tr	1/301	0.889952	0.896405	0	0	0.452662	0.0527747	LAPTM5
superficial stratum of r6BI	1/301	0.889952	0.896405	0	0	0.452662	0.0527747	IL1B
superficial stratum of r6Tr	1/301	0.889952	0.896405	0	0	0.452662	0.0527747	LAPTM5
superficial stratum of r6Ve	1/301	0.889952	0.896405	0	0	0.452662	0.0527747	MMP14
superficial stratum of r8BL	1/301	0.889952	0.896405	0	0	0.452662	0.0527747	NRG4
superficial stratum of r8BM	1/301	0.889952	0.896405	0	0	0.452662	0.0527747	RPL27
superficial stratum of r8Lim	1/301	0.889952	0.896405	0	0	0.452662	0.0527747	IER3
superficial stratum of r9Lim	1/301	0.889952	0.896405	0	0	0.452662	0.0527747	S100A4
superficial stratum of the PBC	1/301	0.889952	0.896405	0	0	0.452662	0.0527747	PRDX1
terminal hypothalamus (rostral hypothalamus)	1/301	0.889952	0.896405	0	0	0.452662	0.0527747	SDC2
upper dorsal perifornical nucleus	1/301	0.889952	0.896405	0	0	0.452662	0.0527747	RPS21
ventral juxtacommissural pretectal nucleus	1/301	0.889952	0.896405	0	0	0.452662	0.0527747	ATP5G3
ventral lateral nucleus	1/301	0.889952	0.896405	0	0	0.452662	0.0527747	RGS16
ventral nuclei	1/301	0.889952	0.896405	0	0	0.452662	0.0527747	RGS16
ventral part of JcP	1/301	0.889952	0.896405	0	0	0.452662	0.0527747	ATP5G3
ventral part of PcP	1/301	0.889952	0.896405	0	0	0.452662	0.0527747	RGS16
ventral reuniens nucleus	1/301	0.889952	0.896405	0	0	0.452662	0.0527747	RGS16
ventral striatum	1/301	0.889952	0.896405	0	0	0.452662	0.0527747	ACTN1
ventral tier of thalamus	1/301	0.889952	0.896405	0	0	0.452662	0.0527747	RGS16
ventral tuberomammillary nucleus, superficial part (histaminergic)	1/301	0.889952	0.896405	0	0	0.452662	0.0527747	FCER1G
ventrolateral part of isA	1/301	0.889952	0.896405	0	0	0.452662	0.0527747	RPS6
ventrolateral periolivary nucleus	1/301	0.889952	0.896405	0	0	0.452662	0.0527747	NRG4
ventropallial prepiriform area	1/301	0.889952	0.896405	0	0	0.452662	0.0527747	TYROBP
Thalamus	1/334	0.913779	0.919891	0	0	0.407115	0.0367083	RGS16
Paracentral nucleus	1/353	0.925093	0.930762	0	0	0.384766	0.0299582	RGS16
Anteromedial nucleus	1/357	0.92728	0.932443	0	0	0.380364	0.0287174	RGS16
Hindbrain	2/595	0.932411	0.93708	0	0	0.454298	0.0317927	BTG1;SPP1
Inferior colliculus	1/377	0.9373	0.94147	0	0	0.359763	0.0232954	S100A6
Subiculum	1/389	0.94264	0.946308	0	0	0.348421	0.0205814	YWHAB
Ventral tegmental nucleus	1/391	0.943485	0.94663	0	0	0.346599	0.0201632	RPS12
Central amygdalar nucleus, lateral part	1/401	0.947529	0.950159	0	0	0.33776	0.0182046	DBI
Field CA2, stratum radiatum	1/410	0.950921	0.953032	0	0	0.330175	0.0166157	PFN1
Subgeniculate nucleus	1/443	0.9616	0.9632	0	0	0.305006	0.0119431	MSN
Suprageniculate nucleus	1/478	0.970411	0.971487	0	0	0.282116	0.00847344	RGS16
Olivary pretectal nucleus	1/514	0.977381	0.977923	0	0	0.261831	0.00599034	RPL27
Cuneiform nucleus	1/530	0.97993	0.97993	0	0	0.253702	0.00514371	RPS18

## Sheet: Allen Brain Atlas down
Term	Overlap	P-value	Adjusted P-value	Old P-value	Old Adjusted P-value	Odds Ratio	Combined Score	Genes
Primary somatosensory area, lower limb, layer 1	17/300	6.54001e-11	5.9089e-08	0	0	9.18518	215.397	HSP90AB1;CD81;RPL23;OAZ1;ACTB;CHCHD2;TUBA1B;CANX;RPL15;FAU;ND3;RPS27A;SQSTM1;CTSD;GAPDH;EIF4G2;TPT1
layer 1 of FCx	17/300	6.54001e-11	5.9089e-08	0	0	9.18518	215.397	CD81;RPS8;ATP5G3;EEF2;OAZ1;CHCHD2;MYL6;TUBA1B;RPS16;CANX;CALR;ND3;RPS27A;CTSD;RPS24;EIF4G2;TPT1
Cerebellar cortex	16/300	5.98748e-10	3.60646e-07	0	0	8.54722	181.51	RPL5;HSP90AB1;RPS8;YWHAB;RPL23;RPS6;RPL35A;MYL6;RPS16;RPL27A;RPL37A;RPL15;RPS11;RPS21;PFDN5;RPS24
Primary motor area, Layer 1	15/300	5.10664e-09	1.31824e-06	0	0	7.92308	151.273	CD81;EEF2;OAZ1;ACTB;CHCHD2;TUBA1B;RPS16;RAB31;CANX;ND3;RPS27A;SQSTM1;CTSD;RPS24;TPT1
Primary somatosensory area, trunk, layer 1	15/300	5.10664e-09	1.31824e-06	0	0	7.92308	151.273	HSP90AB1;CD81;RPL23;ACTB;TUBA1B;CSDE1;CANX;RPL15;FAU;ND3;RPS27A;SQSTM1;CTSD;GAPDH;TPT1
Simple lobule, molecular layer	15/300	5.10664e-09	1.31824e-06	0	0	7.92308	151.273	RPL5;RPS8;RPL23;RPS6;ACTB;RPS16;RPS19;RPL27A;RPL37A;RPL15;FAU;RPS11;RPS21;PFDN5;RPS24
layer 1 of PCx	15/300	5.10664e-09	1.31824e-06	0	0	7.92308	151.273	CD81;RPL23;OAZ1;ACTB;CHCHD2;TUBA1B;CSDE1;CANX;RPL15;ND3;RPS27A;SQSTM1;CTSD;EIF4G2;TPT1
Cerebellum	14/300	4.04277e-08	6.64117e-06	0	0	7.31239	124.484	RPL5;RPS8;RPL23;RPS6;RPL35A;MYL6;RPS16;RPL27A;RPL37A;RPL15;RPS11;RPS21;PFDN5;RPS24
Secondary motor area, layer 1	14/300	4.04277e-08	6.64117e-06	0	0	7.31239	124.484	CD81;RPL23;RPL35A;DBI;CHCHD2;TUBA1B;RAB31;CANX;ND3;RPS27A;CTSD;RPS24;EIF4G2;TPT1
Simple lobule	14/300	4.04277e-08	6.64117e-06	0	0	7.31239	124.484	RPL5;RPS8;RPL23;RPS6;ACTB;RPS16;RPS19;RPL27A;RPL37A;RPL15;RPS11;RPS21;PFDN5;RPS24
Simple lobule, granular layer	14/300	4.04277e-08	6.64117e-06	0	0	7.31239	124.484	RPL5;RPS8;RPL23;RPS6;ACTB;RPS16;RPS19;RPL27A;RPL37A;RPL15;RPS11;RPS21;PFDN5;RPS24
Ansiform lobule	13/300	2.95867e-07	1.84356e-05	0	0	6.71481	100.946	RPL5;RPS8;RPL23;RPS6;MYL6;RPS16;RPS19;RPL27A;RPL15;RPS11;RPS21;PFDN5;RPS24
Crus 1	13/300	2.95867e-07	1.84356e-05	0	0	6.71481	100.946	RPL5;RPS8;RPL23;RPS6;RPS16;RPS19;RPL27A;RPL37A;RPL15;RPS11;RPS21;PFDN5;RPS24
Crus 2, molecular layer	13/300	2.95867e-07	1.84356e-05	0	0	6.71481	100.946	RPL5;RPS8;RPL23;RPS6;RPL35A;MYL6;RPS16;RPS19;RPL27A;RPL15;RPS11;RPS21;PFDN5
Culmen	13/300	2.95867e-07	1.84356e-05	0	0	6.71481	100.946	RPL5;HSP90AB1;YWHAB;RPL23;RPL35A;MYL6;TUBA1B;RPS16;RPS19;RPL27A;RPL37A;RPS21;RPS24
OB olfactory fiber layer	13/300	2.95867e-07	1.84356e-05	0	0	6.71481	100.946	HSP90AA1;ATP5G3;EEF2;ACTB;CHCHD2;TUBA1B;RPS16;RPL27A;RPS11;RPS27A;CTSD;RPS24;EIF4G2
Paraflocculus, granular layer	13/300	2.95867e-07	1.84356e-05	0	0	6.71481	100.946	HSP90AA1;CD81;RPS8;RPL23;RPS6;ACTB;RPS16;RPL27A;CANX;RPL37A;RPL15;RPS11;PFDN5
Paramedian lobule, granular layer	13/300	2.95867e-07	1.84356e-05	0	0	6.71481	100.946	RPL5;RPS8;RPL23;RPS6;RPL35A;OAZ1;RPS14;RPS16;RPL27A;RPL37A;RPS11;PFDN5;RPS24
Primary somatosensory area, barrel field, layer 1	13/300	2.95867e-07	1.84356e-05	0	0	6.71481	100.946	CD81;RPL23;OAZ1;CHCHD2;CANX;RPL15;ND3;RPS27A;PHLDA1;CTSD;GAPDH;RPS24;TPT1
Uvula (IX)	13/300	2.95867e-07	1.84356e-05	0	0	6.71481	100.946	RPL5;RPS8;RPL23;RPL11;RPL35A;TUBA1B;RPL27A;RPL37A;RPS3;PHLDA1;RPS21;PFDN5;RPS24
Uvula (IX), molecular layer	13/300	2.95867e-07	1.84356e-05	0	0	6.71481	100.946	RPL5;RPS8;RPL23;RPL11;RPL35A;TUBA1B;RPL27A;RPL37A;RPS3;PHLDA1;RPS21;PFDN5;RPS24
cerebellar white matter	13/300	2.95867e-07	1.84356e-05	0	0	6.71481	100.946	RPL5;RPS8;RPL23;RPS6;RPL35A;OAZ1;MYL6;RPS16;RPL27A;RPL15;RPS11;RPS21;PFDN5
cortex of cerebellar vermis	13/300	2.95867e-07	1.84356e-05	0	0	6.71481	100.946	RPL5;HSP90AB1;RPS8;YWHAB;RPL23;RPL35A;MYL6;TUBA1B;RPS16;RPS19;RPL27A;RPS21;RPS24
mantle zone of cerebellar vermis	13/300	2.95867e-07	1.84356e-05	0	0	6.71481	100.946	RPL5;HSP90AB1;RPS8;YWHAB;RPL23;RPL35A;MYL6;TUBA1B;RPS16;RPS19;RPL27A;RPS21;RPS24
periventricular stratum of CbH	13/300	2.95867e-07	1.84356e-05	0	0	6.71481	100.946	RPL5;RPS8;RPL23;RPS6;RPL35A;OAZ1;MYL6;RPS16;RPL27A;RPL15;RPS11;RPS21;PFDN5
periventricular stratum of cerebellar vermis	13/300	2.95867e-07	1.84356e-05	0	0	6.71481	100.946	RPL5;HSP90AB1;YWHAB;RPL23;RPL11;MYL6;TUBA1B;RPS16;RPS19;RPL27A;RPL37A;RPS21;RPS24
superficial stratum of OB	13/300	2.95867e-07	1.84356e-05	0	0	6.71481	100.946	RPS8;YWHAB;RPS6;ATP5G3;EEF2;RPS14;TUBA1B;RPS16;RPL27A;RPS11;RPS27A;RPS24;TPT1
superficial stratum of cerebellar vermis	13/300	2.95867e-07	1.84356e-05	0	0	6.71481	100.946	RPL5;HSP90AB1;RPS8;YWHAB;RPL23;RPL35A;MYL6;TUBA1B;RPS16;RPS19;RPL27A;RPS21;RPS24
white matter of cerebellar vermis	13/300	2.95867e-07	1.84356e-05	0	0	6.71481	100.946	RPL5;HSP90AB1;YWHAB;RPL23;RPL11;MYL6;TUBA1B;RPS16;RPS19;RPL27A;RPL37A;RPS21;RPS24
Crus 1, molecular layer	12/300	1.99233e-06	7.50029e-05	0	0	6.13001	80.4638	RPL5;RPS16;RPS19;RPS8;RPL23;RPL27A;RPS6;RPL37A;RPL15;RPS21;PFDN5;RPS24
Crus 2	12/300	1.99233e-06	7.50029e-05	0	0	6.13001	80.4638	RPL5;RPS16;RPS19;RPS8;RPL23;RPL27A;RPS6;RPL35A;RPL15;RPS11;RPS21;PFDN5
Lobules IV-V	12/300	1.99233e-06	7.50029e-05	0	0	6.13001	80.4638	RPL5;MYL6;TUBA1B;RPS16;HSP90AB1;RPS19;RPL23;RPL27A;RPL37A;RPL35A;RPS21;RPS24
Lobules IV-V, molecular layer	12/300	1.99233e-06	7.50029e-05	0	0	6.13001	80.4638	RPL5;MYL6;TUBA1B;RPS16;HSP90AB1;RPS19;YWHAB;RPL23;RPL27A;RPL35A;RPS21;RPS24
OB glomerular layer	12/300	1.99233e-06	7.50029e-05	0	0	6.13001	80.4638	RPS14;TUBA1B;RPS16;RPS8;YWHAB;RPL27A;RPS6;RPS11;EEF2;RPS27A;RPS24;TPT1
Paraflocculus	12/300	1.99233e-06	7.50029e-05	0	0	6.13001	80.4638	HSP90AA1;RPS16;RPS8;RPL23;RPL27A;RPS6;CANX;RPL37A;RPL15;RPS11;PFDN5;ACTB
Paramedian lobule	12/300	1.99233e-06	7.50029e-05	0	0	6.13001	80.4638	RPL5;RPS14;RPS16;RPS8;RPL23;RPL27A;RPS6;RPL37A;RPL35A;RPS11;OAZ1;PFDN5
Paramedian lobule, molecular layer	12/300	1.99233e-06	7.50029e-05	0	0	6.13001	80.4638	RPL5;MYL6;RPS16;RPS8;RPL23;RPL27A;RPS6;RPL37A;RPL35A;RPS11;OAZ1;PFDN5
Posterior parietal association areas, layer 1	12/300	1.99233e-06	7.50029e-05	0	0	6.13001	80.4638	CD81;RPL23;CSDE1;CANX;ATP5G3;RPS27A;PHLDA1;SQSTM1;CTSD;ACTB;EIF4G2;TPT1
Purkinje cell layer of CbHCx	12/300	1.99233e-06	7.50029e-05	0	0	6.13001	80.4638	RPL5;RPS16;RPS8;RPL23;RPL27A;RPS6;RPL37A;RPL35A;RPL15;RPS11;OAZ1;PFDN5
Uvula (IX), granular layer	12/300	1.99233e-06	7.50029e-05	0	0	6.13001	80.4638	RPL5;TUBA1B;RPS8;RPL23;RPL27A;RPL37A;RPL11;RPS3;RPL35A;PHLDA1;RPS21;RPS24
cerebellar hemisphere	12/300	1.99233e-06	7.50029e-05	0	0	6.13001	80.4638	RPL5;RPS16;RPS8;RPL23;RPL27A;RPS6;RPL37A;RPL35A;RPL15;RPS11;OAZ1;PFDN5
cerebellar vermis	12/300	1.99233e-06	7.50029e-05	0	0	6.13001	80.4638	RPL5;MYL6;TUBA1B;RPS16;HSP90AB1;RPS19;RPS8;RPL23;RPL27A;RPL35A;RPS21;RPS24
internal granular layer of CbVCx	12/300	1.99233e-06	7.50029e-05	0	0	6.13001	80.4638	RPL5;MYL6;TUBA1B;RPS16;HSP90AB1;RPS19;RPS8;RPL23;RPL27A;RPL35A;RPS21;RPS24
layer 2 of FCx	12/300	1.99233e-06	7.50029e-05	0	0	6.13001	80.4638	CHCHD2;MYL6;TUBA1B;CD81;RPS8;CANX;ND3;EEF2;RPS27A;CTSD;RPS24;TPT1
layer 2 of PCx	12/300	1.99233e-06	7.50029e-05	0	0	6.13001	80.4638	CHCHD2;CD81;RPL23;CANX;DBI;RPL15;ND3;RPS27A;OAZ1;CTSD;RPS24;TPT1
mantle zone of CbH	12/300	1.99233e-06	7.50029e-05	0	0	6.13001	80.4638	RPL5;RPS16;RPS8;RPL23;RPL27A;RPS6;RPL37A;RPL35A;RPL15;RPS11;OAZ1;PFDN5
molecular layer of CbHCx	12/300	1.99233e-06	7.50029e-05	0	0	6.13001	80.4638	RPL5;RPS16;RPS8;RPL23;RPL27A;RPS6;RPL37A;RPL35A;RPL15;RPS11;OAZ1;PFDN5
prepontine hindbrain	12/300	1.99233e-06	7.50029e-05	0	0	6.13001	80.4638	RPL5;MYL6;RPS16;HSP90AB1;ARPC2;RPS8;YWHAB;RPL23;RPL27A;RPL15;OAZ1;PFDN5
Anterior olfactory nucleus, external part	11/300	1.22786e-05	0.00035218	0	0	5.55766	62.8441	CHCHD2;RPS16;RPS8;RPS6;RPL37A;ATP5G3;EEF2;RPS27A;PHLDA1;RPS24;TPT1
Anterior olfactory nucleus, layer 1	11/300	1.22786e-05	0.00035218	0	0	5.55766	62.8441	CHCHD2;CD81;RPS8;RPS6;RPL37A;ATP5G3;EEF2;RPS27A;OAZ1;RPS24;TPT1
Crus 1, granular layer	11/300	1.22786e-05	0.00035218	0	0	5.55766	62.8441	RPL5;RPS16;RPS19;RPS8;RPL23;RPL27A;RPS6;RPS11;RPS21;PFDN5;RPS24
Crus 2, granular layer	11/300	1.22786e-05	0.00035218	0	0	5.55766	62.8441	RPL5;RPS16;RPS19;RPS8;RPL23;RPL27A;RPS6;RPL35A;RPS11;RPS21;PFDN5
Declive (VI), granular layer	11/300	1.22786e-05	0.00035218	0	0	5.55766	62.8441	RPL5;MYL6;TUBA1B;RPS16;HSP90AB1;RPS19;RPS8;RPL23;RPL35A;RPS21;RPS24
Hemispheric regions	11/300	1.22786e-05	0.00035218	0	0	5.55766	62.8441	RPL5;RPS16;RPS8;RPL23;RPL27A;RPS6;RPL37A;RPL35A;RPL15;RPS11;PFDN5
Lobules IV-V, granular layer	11/300	1.22786e-05	0.00035218	0	0	5.55766	62.8441	RPL5;MYL6;TUBA1B;RPS16;RPS19;RPL23;RPL27A;RPL37A;RPL35A;RPS21;RPS24
Main olfactory bulb, glomerular layer	11/300	1.22786e-05	0.00035218	0	0	5.55766	62.8441	RPS14;TUBA1B;RPS16;RPS8;RPL27A;RPS6;RPS11;EEF2;SMAP2;RPS24;TPT1
Paraflocculus, molecular layer	11/300	1.22786e-05	0.00035218	0	0	5.55766	62.8441	HSP90AA1;RPS16;RPS18;RPS8;RPL23;RPL27A;RPS6;RPL37A;RPL15;RPS11;ACTB
Primary motor area, Layer 2/3	11/300	1.22786e-05	0.00035218	0	0	5.55766	62.8441	CD63;CHCHD2;RAB31;CD81;CANX;HMGA1;RPS27A;SQSTM1;OAZ1;CTSD;RPS24
cortex of cerebellar hemisphere	11/300	1.22786e-05	0.00035218	0	0	5.55766	62.8441	RPL5;RPS16;RPS8;RPL23;RPL27A;RPS6;RPL37A;RPL35A;RPL15;RPS11;PFDN5
internal granular layer of CbHCx	11/300	1.22786e-05	0.00035218	0	0	5.55766	62.8441	RPL5;RPS16;RPS8;RPL23;RPL27A;RPS6;RPL37A;RPL35A;RPL15;RPS11;PFDN5
molecular layer of CbVCx	11/300	1.22786e-05	0.00035218	0	0	5.55766	62.8441	RPL5;MYL6;TUBA1B;HSP90AB1;RPS19;RPS8;RPL23;RPL27A;RPL35A;RPS21;RPS24
r1 alar plate	11/300	1.22786e-05	0.00035218	0	0	5.55766	62.8441	RPL5;RPS16;RPS8;RPL23;RPL27A;RPS6;RPL37A;RPL15;RPS11;OAZ1;PFDN5
superficial stratum of cerebellar hemisphere	11/300	1.22786e-05	0.00035218	0	0	5.55766	62.8441	RPL5;RPS16;RPS8;RPL23;RPL27A;RPS6;RPL37A;RPL35A;RPL15;RPS11;PFDN5
Hindbrain	14/560	5.85269e-05	0.00144618	0	0	3.77941	36.8342	RPL5;HSP90AB1;H2AFY;RPL23;RPL11;HNRNPU;OAZ1;MYL6;RPS16;RPL27A;PSAP;RPS3;RPL15;GAPDH
Anteromedial visual area, layer 1	10/300	6.88278e-05	0.00144618	0	0	4.99745	47.895	CD81;RPL23;CSDE1;ATP5G3;EEF2;PHLDA1;SQSTM1;CTSD;ACTB;EIF4G2
Basic cell groups and regions	10/300	6.88278e-05	0.00144618	0	0	4.99745	47.895	RPS16;ARPC2;CD81;RPS8;RPL37A;RPL35A;RPS11;ND3;EEF2;RPS24
Copula pyramidis	10/300	6.88278e-05	0.00144618	0	0	4.99745	47.895	RPL5;RPS14;RPL30;MYL6;RPL23;RPL27A;RPL37A;RPS11;SMAP2;RPS21
Cortical amygdalar area, posterior part, lateral zone, layer 1	10/300	6.88278e-05	0.00144618	0	0	4.99745	47.895	CAP1;CHCHD2;TUBA1B;HSP90AB1;RPL15;FAU;SQSTM1;PFDN5;ACTB;TPT1
Declive (VI)	10/300	6.88278e-05	0.00144618	0	0	4.99745	47.895	RPL5;MYL6;TUBA1B;RPS16;HSP90AB1;RPS8;RPL23;RPL35A;RPS21;RPS24
Declive (VI), molecular layer	10/300	6.88278e-05	0.00144618	0	0	4.99745	47.895	RPL5;MYL6;TUBA1B;RPS16;HSP90AB1;RPS8;RPL23;RPL35A;RPS21;RPS24
Entorhinal area, lateral part, layer 1	10/300	6.88278e-05	0.00144618	0	0	4.99745	47.895	CAP1;RPL5;RPS14;CHCHD2;RAB31;APLP2;RPL37A;CTSD;PFDN5;TPT1
Primary somatosensory area, lower limb, layer 2/3	10/300	6.88278e-05	0.00144618	0	0	4.99745	47.895	RPL30;CD81;RPL23;CANX;FAU;RPS27A;CTSD;ACTB;EIF4G2;TPT1
Primary somatosensory area, mouth, layer 1	10/300	6.88278e-05	0.00144618	0	0	4.99745	47.895	CHCHD2;MYL6;CD81;RPL37A;RPS11;ND3;PHLDA1;OAZ1;CTSD;RPS24
Primary somatosensory area, upper limb, layer 1	10/300	6.88278e-05	0.00144618	0	0	4.99745	47.895	CHCHD2;TUBA1B;CD81;CANX;RPL15;ND3;RPS27A;SQSTM1;CTSD;TPT1
Pyramus (VIII)	10/300	6.88278e-05	0.00144618	0	0	4.99745	47.895	TUBA1B;RPS16;RPS8;RPL23;RPL27A;RPS6;RPS3;RPL35A;RPS21;RPS24
Pyramus (VIII), granular layer	10/300	6.88278e-05	0.00144618	0	0	4.99745	47.895	TUBA1B;RPS16;RPS8;RPL23;RPL27A;RPS6;RPS3;RPL35A;RPS21;RPS24
Pyramus (VIII), molecular layer	10/300	6.88278e-05	0.00144618	0	0	4.99745	47.895	TUBA1B;RPS16;RPS8;RPL23;RPL27A;RPS6;RPS3;RPL35A;RPS21;RPS24
Retrosplenial area, dorsal part, layer 1	10/300	6.88278e-05	0.00144618	0	0	4.99745	47.895	TUBA1B;RPS19;RPL23;RPL35A;LCP1;ND3;CTSD;ACTB;EIF4G2;ZMPSTE24
Retrosplenial area, lateral agranular part, layer 1	10/300	6.88278e-05	0.00144618	0	0	4.99745	47.895	RAB31;CD81;APLP2;RPS6;EEF2;PHLDA1;SQSTM1;OAZ1;CTSD;ACTB
Vermal regions	10/300	6.88278e-05	0.00144618	0	0	4.99745	47.895	RPL5;MYL6;TUBA1B;HSP90AB1;YWHAB;RPL23;RPL27A;RPL35A;RPS21;RPS24
layer 1 of AOV cortex	10/300	6.88278e-05	0.00144618	0	0	4.99745	47.895	CHCHD2;CD81;RPS8;RPS6;ATP5G3;EEF2;RPS27A;CTSD;RPS24;TPT1
layer 1 of ERCx	10/300	6.88278e-05	0.00144618	0	0	4.99745	47.895	CAP1;RPL5;RAB31;HSP90AB1;RPL37A;FAU;RPS11;OAZ1;PFDN5;ACTB
layer 1 of InsCx	10/300	6.88278e-05	0.00144618	0	0	4.99745	47.895	CHCHD2;RAB31;ARPC2;CD81;PRDX1;ATP5G3;RPS11;EEF2;OAZ1;CTSD
neural plate	10/300	6.88278e-05	0.00144618	0	0	4.99745	47.895	RPS16;CD81;RPS8;RPS6;RPL37A;RPL35A;RPS11;ND3;EEF2;RPS24
r11 alar plate	10/300	6.88278e-05	0.00144618	0	0	4.99745	47.895	RPS14;HSP90AA1;GRN;RAB31;RPL31;RPL11;RPS11;PHLDA1;PFDN5;GAPDH
rhombomere 1	10/300	6.88278e-05	0.00144618	0	0	4.99745	47.895	RPL5;RPS16;RPS8;RPL23;RPL27A;RPS6;RPL15;RPS11;OAZ1;PFDN5
Copula pyramidis, granular layer	9/300	0.000348392	0.00577563	0	0	4.44906	35.4242	RPL5;RPL30;MYL6;RPL23;RPL27A;RPL37A;RPS11;SMAP2;RPS21
Entorhinal area, medial part, dorsal zone, layer 1	9/300	0.000348392	0.00577563	0	0	4.44906	35.4242	CAP1;RPL5;RPS14;CHCHD2;HSP90AB1;FAU;RPS27A;PFDN5;ACTB
Flocculus, molecular layer	9/300	0.000348392	0.00577563	0	0	4.44906	35.4242	HSP90AA1;RPS16;RPS18;RPS8;RPL27A;CSDE1;RPS6;RPL37A;RPS11
Folium-tuber vermis (VII)	9/300	0.000348392	0.00577563	0	0	4.44906	35.4242	TUBA1B;RPS16;HSP90AB1;RPS8;RPL23;RPS3;RPL35A;RPS21;RPS24
Folium-tuber vermis (VII), granular layer	9/300	0.000348392	0.00577563	0	0	4.44906	35.4242	TUBA1B;RPS16;HSP90AB1;RPS8;RPL23;RPS3;RPL35A;RPS21;RPS24
Folium-tuber vermis (VII), molecular layer	9/300	0.000348392	0.00577563	0	0	4.44906	35.4242	TUBA1B;RPS16;HSP90AB1;RPS8;RPL23;RPS3;RPL35A;RPS21;RPS24
Frontal pole, layer 1	9/300	0.000348392	0.00577563	0	0	4.44906	35.4242	RPL5;TUBA1B;CD81;RPS8;RPL35A;CALR;ATP5G3;EEF2;RPS24
Main olfactory bulb	9/300	0.000348392	0.00577563	0	0	4.44906	35.4242	RPS16;RPS8;YWHAB;RPL27A;RPS6;RPS11;EEF2;RPS24;TPT1
Mus musculus	9/300	0.000348392	0.00577563	0	0	4.44906	35.4242	RPS16;CD81;RPS8;RPL37A;RPL35A;RPS11;ND3;EEF2;RPS24
OB outer plexiform layer	9/300	0.000348392	0.00577563	0	0	4.44906	35.4242	RPS16;RPS8;RPL27A;RPS6;RPL37A;RPS11;EEF2;SMAP2;RPS24
Primary visual area, layer 1	9/300	0.000348392	0.00577563	0	0	4.44906	35.4242	MYL6;RPL23;CANX;DBI;ATP5G3;FAU;ND3;EEF2;PHLDA1
Purkinje cell layer of CbVCx	9/300	0.000348392	0.00577563	0	0	4.44906	35.4242	RPL5;MYL6;TUBA1B;HSP90AB1;YWHAB;RPL23;RPL35A;RPS21;EIF4G2
Retrosplenial area, ventral part, layer 5	9/300	0.000348392	0.00577563	0	0	4.44906	35.4242	RPS19;ARPC2;SPP1;MSN;RPL35A;DBI;LCP1;RPS12;ZMPSTE24
Secondary motor area, layer 2/3	9/300	0.000348392	0.00577563	0	0	4.44906	35.4242	RAB31;CD81;CANX;RPL35A;DBI;CALR;CTSD;RPS24;TPT1
intermediate stratum of OB	9/300	0.000348392	0.00577563	0	0	4.44906	35.4242	RPS16;RPS8;RPL27A;RPS6;RPL37A;RPS11;EEF2;SMAP2;RPS24
isthmic alar plate	9/300	0.000348392	0.00577563	0	0	4.44906	35.4242	RPL5;MYL6;TUBA1B;RPS16;HSP90AB1;RPS19;YWHAB;RPL23;RPL27A
lateral part of r7B	9/300	0.000348392	0.00577563	0	0	4.44906	35.4242	HSP90AB1;RPL31;APLP2;PSAP;RPL11;HNRNPU;SMAP2;GAPDH;ACTB
mantle zone of OB	9/300	0.000348392	0.00577563	0	0	4.44906	35.4242	RPS16;RPS8;YWHAB;RPL27A;RPS6;RPS11;EEF2;RPS24;TPT1
mantle zone of r7BL	9/300	0.000348392	0.00577563	0	0	4.44906	35.4242	HSP90AB1;RPL31;APLP2;PSAP;RPL11;HNRNPU;SMAP2;GAPDH;ACTB
olfactory bulb, principal part	9/300	0.000348392	0.00577563	0	0	4.44906	35.4242	RPS16;RPS8;YWHAB;RPL27A;RPS6;RPS11;EEF2;RPS24;TPT1
periventricular stratum of OB	9/300	0.000348392	0.00577563	0	0	4.44906	35.4242	RPS8;YWHAB;RPS6;RPL37A;FAU;RPS11;EEF2;RPS21;RPS24
plexiform layer of TuStr	9/300	0.000348392	0.00577563	0	0	4.44906	35.4242	CD63;CD81;RPS8;PRDX1;RPL37A;MSN;EEF2;OAZ1;TPT1
root	9/300	0.000348392	0.00577563	0	0	4.44906	35.4242	RPS16;CD81;RPS8;RPL37A;RPL35A;RPS11;ND3;EEF2;RPS24
Copula pyramidis, molecular layer	8/300	0.00157889	0.0226433	0	0	3.91221	25.2378	RPS14;RPL30;MYL6;RPS8;RPL23;RPL27A;RPS11;SMAP2
Lateral reticular nucleus	8/300	0.00157889	0.0226433	0	0	3.91221	25.2378	H2AFY;RPL31;APLP2;PSAP;CANX;RPS3;SMAP2;ACTB
Main olfactory bulb, outer plexiform layer	8/300	0.00157889	0.0226433	0	0	3.91221	25.2378	RPS16;RPS8;YWHAB;RPL27A;RPS6;RPS11;EEF2;RPS24
OB granular layer	8/300	0.00157889	0.0226433	0	0	3.91221	25.2378	RPS8;RPS6;RPL37A;FAU;RPS11;EEF2;RPS21;RPS24
OB mitral cell layer	8/300	0.00157889	0.0226433	0	0	3.91221	25.2378	RPS8;RPL27A;RPS6;RPL37A;FAU;RPS11;EEF2;RPS24
Olfactory areas	8/300	0.00157889	0.0226433	0	0	3.91221	25.2378	CD81;RPS8;RGS16;RPS6;ATP5G3;RPS11;EEF2;RPS24
Primary somatosensory area, trunk	8/300	0.00157889	0.0226433	0	0	3.91221	25.2378	ARPC2;CD81;NRG4;HMGA1;DBI;TIMP1;MMP9;ZMPSTE24
Primary somatosensory area, trunk, layer 2/3	8/300	0.00157889	0.0226433	0	0	3.91221	25.2378	CD81;GDF15;CANX;RPL15;FAU;ND3;SQSTM1;CTSD
Primary somatosensory area, upper limb	8/300	0.00157889	0.0226433	0	0	3.91221	25.2378	ARPC2;CD81;NRG4;PRDX1;HMGA1;DBI;ND3;ZMPSTE24
Primary somatosensory area, upper limb, layer 2/3	8/300	0.00157889	0.0226433	0	0	3.91221	25.2378	CHCHD2;CD81;CANX;RPL15;ND3;CTSD;RPS24;TPT1
Retrosplenial area	8/300	0.00157889	0.0226433	0	0	3.91221	25.2378	RPS19;SDC2;SPP1;RPL35A;DBI;LCP1;RPS12;ZMPSTE24
Retrosplenial area, ventral part	8/300	0.00157889	0.0226433	0	0	3.91221	25.2378	RPS19;ARPC2;SPP1;RPL35A;DBI;LCP1;RPS12;ZMPSTE24
dorsal pallium/isocortex	8/300	0.00157889	0.0226433	0	0	3.91221	25.2378	CD63;ARPC2;CD81;SDC2;PRDX1;HMGA1;DBI;RPS24
isthmus	8/300	0.00157889	0.0226433	0	0	3.91221	25.2378	RPL5;MYL6;TUBA1B;HSP90AB1;RPS19;YWHAB;RPL23;RPL27A
layer 1 of VPrP cortex	8/300	0.00157889	0.0226433	0	0	3.91221	25.2378	CD63;RPS8;PRDX1;RPS11;EEF2;OAZ1;RHOA;IER3
superficial stratum of PCx (cortical plate/marginal zone)	8/300	0.00157889	0.0226433	0	0	3.91221	25.2378	ARPC2;CD81;NRG4;HMGA1;DBI;TIMP1;ND3;RPS24
ventral pallium	8/300	0.00157889	0.0226433	0	0	3.91221	25.2378	CD81;RPS8;RPS6;ATP5G3;FAU;RPS11;EEF2;RPS24
Ventrolateral preoptic nucleus	9/439	0.00479059	0.0681622	0	0	2.98948	15.9671	HSP90AA1;HSP90AB1;RPS18;RPS6;PFN1;PHLDA1;CTSD;GAPDH;ATP5L
Agranular insular area, dorsal part, layer 1	7/300	0.00634172	0.0729903	0	0	3.38661	17.1383	CHCHD2;PRDX1;HMGA1;ATP5G3;RPS11;EEF2;CTSD
Anteromedial visual area, layer 2/3	7/300	0.00634172	0.0729903	0	0	3.38661	17.1383	CD81;CSDE1;CANX;HMGA1;DBI;PHLDA1;EIF4G2
Flocculus	7/300	0.00634172	0.0729903	0	0	3.38661	17.1383	HSP90AA1;RPS16;RPS18;RPL27A;RPS6;RPL37A;RPS11
Frontal pole, cerebral cortex	7/300	0.00634172	0.0729903	0	0	3.38661	17.1383	RPL5;CD81;RPS8;RPL35A;CALR;EEF2;RPS24
Frontal pole, layer 2/3	7/300	0.00634172	0.0729903	0	0	3.38661	17.1383	RPL5;MYL6;CD81;RPS8;RPL35A;EEF2;RPS24
Lateral reticular nucleus, magnocellular part	7/300	0.00634172	0.0729903	0	0	3.38661	17.1383	H2AFY;RPL31;APLP2;CANX;RPS3;SMAP2;ACTB
Olfactory tubercle, molecular layer	7/300	0.00634172	0.0729903	0	0	3.38661	17.1383	RAB31;CD81;RPS8;PRDX1;EEF2;CTSD;TPT1
Primary somatosensory area, mouth, layer 2/3	7/300	0.00634172	0.0729903	0	0	3.38661	17.1383	CHCHD2;CDKN1A;CD81;HMGA1;RPS11;ND3;RPS24
Primary somatosensory area, unassigned, layer 1	7/300	0.00634172	0.0729903	0	0	3.38661	17.1383	CHCHD2;CD81;RPS11;PHLDA1;OAZ1;CTSD;RPS24
Primary somatosensory area, unassigned, layer 2/3	7/300	0.00634172	0.0729903	0	0	3.38661	17.1383	CD81;SLC20A1;HMGA1;RPS11;ND3;CTSD;RPS24
Retrosplenial area, ventral part, layer 2	7/300	0.00634172	0.0729903	0	0	3.38661	17.1383	RPS19;RPL35A;DBI;CALR;LCP1;RPS12;ZMPSTE24
dorsolateral part of Lat	7/300	0.00634172	0.0729903	0	0	3.38661	17.1383	RPS14;IL1RN;RPS16;RPL27A;RPL35A;RPS11;RPS21
intermediate stratum of r9Ve	7/300	0.00634172	0.0729903	0	0	3.38661	17.1383	HSP90AA1;GRN;RPL11;RPS3;PHLDA1;RPS21;ACTG1
layer 3 of PCx	7/300	0.00634172	0.0729903	0	0	3.38661	17.1383	CD81;CANX;HMGA1;DBI;ND3;CTSD;RPS24
layer 4 of FCx	7/300	0.00634172	0.0729903	0	0	3.38661	17.1383	CD63;BTG1;ARPC2;CD81;HMGA1;DBI;RPS24
mantle zone of PCx	7/300	0.00634172	0.0729903	0	0	3.38661	17.1383	CD81;NRG4;HMGA1;DBI;TIMP1;ND3;RPS24
mantle zone of r10Ve	7/300	0.00634172	0.0729903	0	0	3.38661	17.1383	HSP90AA1;GRN;RPL11;RPS11;PHLDA1;RPS21;ACTG1
molecular layer of S	7/300	0.00634172	0.0729903	0	0	3.38661	17.1383	TUBA1B;NRG4;SDC2;S100A6;SPP1;TIMP1;ND3
parietal cortex	7/300	0.00634172	0.0729903	0	0	3.38661	17.1383	CD81;NRG4;HMGA1;DBI;TIMP1;ND3;RPS24
parvocellular part of r8LRt	7/300	0.00634172	0.0729903	0	0	3.38661	17.1383	IL1RN;RPL31;APLP2;PSAP;CALR;SMAP2;ACTB
parvocellular part of the r9LRt	7/300	0.00634172	0.0729903	0	0	3.38661	17.1383	IL1RN;RPL31;APLP2;CANX;CALR;SMAP2;ACTB
r10 alar plate	7/300	0.00634172	0.0729903	0	0	3.38661	17.1383	RPS14;HSP90AA1;GRN;RPL11;RPS3;SMAP2;PHLDA1
r10 part of the vestibular column	7/300	0.00634172	0.0729903	0	0	3.38661	17.1383	HSP90AA1;GRN;RPL11;RPS11;PHLDA1;RPS21;ACTG1
r3 roof plate	7/300	0.00634172	0.0729903	0	0	3.38661	17.1383	HSP90AA1;GRN;RPL31;RPS11;SMAP2;PHLDA1;OAZ1
r9 part of spinal trigeminal nucleus, interpolar part	7/300	0.00634172	0.0729903	0	0	3.38661	17.1383	CD63;HSP90AA1;GRN;RPL31;RPL11;RPS3;RPS21
r9 part of spinal vestibular nucleus	7/300	0.00634172	0.0729903	0	0	3.38661	17.1383	HSP90AA1;GRN;RPL11;RPS3;PHLDA1;RPS21;ACTG1
r9 part of the lateral reticular nucleus	7/300	0.00634172	0.0729903	0	0	3.38661	17.1383	IL1RN;H2AFY;RPL31;APLP2;CANX;SMAP2;ACTB
rhombomere 11	7/300	0.00634172	0.0729903	0	0	3.38661	17.1383	RPS14;HSP90AA1;RAB31;PSAP;PHLDA1;PFDN5;ACTG1
superficial stratum of r10Tr	7/300	0.00634172	0.0729903	0	0	3.38661	17.1383	RPS14;HSP90AA1;GRN;RPL31;RPS3;SMAP2;PHLDA1
superficial stratum of r9Tr	7/300	0.00634172	0.0729903	0	0	3.38661	17.1383	CD63;HSP90AA1;GRN;RPL31;RPL11;RPS3;RPS21
Anterior olfactory nucleus	6/300	0.0223011	0.187433	0	0	2.87197	10.9225	CD81;RPS8;RPL37A;ATP5G3;EEF2;RPS24
Flocculus, granular layer	6/300	0.0223011	0.187433	0	0	2.87197	10.9225	RPS16;RPS18;RPL27A;RPS6;RPL37A;RPS11
Inferior olivary complex	6/300	0.0223011	0.187433	0	0	2.87197	10.9225	APLP2;PSAP;CALR;SMAP2;SQSTM1;ACTB
Lateral reticular nucleus, parvicellular part	6/300	0.0223011	0.187433	0	0	2.87197	10.9225	HSP90AA1;RPL31;APLP2;CSDE1;CANX;SMAP2
Main olfactory bulb, mitral layer	6/300	0.0223011	0.187433	0	0	2.87197	10.9225	RPS8;RPS6;RPL37A;RPS11;EEF2;RPS24
Medulla	6/300	0.0223011	0.187433	0	0	2.87197	10.9225	H2AFY;PSAP;RPL11;RPS3;HNRNPU;ACTG1
OB inner plexiform layer	6/300	0.0223011	0.187433	0	0	2.87197	10.9225	RPS8;RPL27A;RPS6;RPS11;EEF2;RPS24
Olfactory tubercle, pyramidal layer	6/300	0.0223011	0.187433	0	0	2.87197	10.9225	RAB31;CD81;RPS8;PRDX1;EEF2;RHOA
Paragigantocellular reticular nucleus	6/300	0.0223011	0.187433	0	0	2.87197	10.9225	APLP2;PSAP;RPS3;LAPTM5;HNRNPU;SMAP2
Posterior parietal association areas, layer 2/3	6/300	0.0223011	0.187433	0	0	2.87197	10.9225	CD81;RPL23;HMGA1;DBI;CTSD;EIF4G2
Primary somatosensory area, barrel field, layer 2/3	6/300	0.0223011	0.187433	0	0	2.87197	10.9225	ARPC2;CD81;TIMP1;ND3;CTSD;RPS24
Primary somatosensory area, lower limb	6/300	0.0223011	0.187433	0	0	2.87197	10.9225	CD63;RPL30;CD81;DBI;MMP9;RPS12
Primary somatosensory area, unassigned, layer 4	6/300	0.0223011	0.187433	0	0	2.87197	10.9225	CD81;PABPC4;RGS16;HMGA1;RPS11;RPS24
Primary visual area, layer 5	6/300	0.0223011	0.187433	0	0	2.87197	10.9225	NRG4;HMGA1;SPP1;DBI;MMP9;ZMPSTE24
Retrosplenial area, dorsal part	6/300	0.0223011	0.187433	0	0	2.87197	10.9225	FCER1G;RPS19;SDC2;DBI;LCP1;ZMPSTE24
Retrosplenial area, dorsal part, layer 2/3	6/300	0.0223011	0.187433	0	0	2.87197	10.9225	RPS19;CD81;RPL35A;DBI;LCP1;ZMPSTE24
Retrosplenial area, lateral agranular part, layer 2/3	6/300	0.0223011	0.187433	0	0	2.87197	10.9225	RAB31;CD81;RPS6;DBI;EEF2;PHLDA1
Retrosplenial area, ventral part, layer 2/3	6/300	0.0223011	0.187433	0	0	2.87197	10.9225	RPS19;RPL35A;DBI;LCP1;RPS12;ZMPSTE24
Retrosplenial area, ventral part, layer 6a	6/300	0.0223011	0.187433	0	0	2.87197	10.9225	SDC2;SPP1;MSN;DBI;MMP9;RPS12
Somatomotor areas	6/300	0.0223011	0.187433	0	0	2.87197	10.9225	CD63;RAB31;BTG1;CD81;DBI;RPS24
Subiculum, dorsal part	6/300	0.0223011	0.187433	0	0	2.87197	10.9225	ARPC2;SDC2;S100A6;HMGA1;SPP1;MMP9
Superior colliculus, zonal layer	6/300	0.0223011	0.187433	0	0	2.87197	10.9225	RPS19;ARPC2;SLC20A1;RPL35A;ND3;RPS12
cerebellar nuclei of CbH	6/300	0.0223011	0.187433	0	0	2.87197	10.9225	RPL5;RPS14;RPL30;RPL27A;RPS21;PFDN5
corticoid layer of TuStr	6/300	0.0223011	0.187433	0	0	2.87197	10.9225	CD63;CD81;RPS8;PRDX1;RPL37A;MSN
dorsal tier of thalamus	6/300	0.0223011	0.187433	0	0	2.87197	10.9225	CDKN1A;RPS19;PABPC4;RPL37A;MMP9;RPS12
dorsolateral part of Med	6/300	0.0223011	0.187433	0	0	2.87197	10.9225	RPL5;MYL6;RPS19;YWHAB;RPL11;RPS21
intermediate stratum of CbH	6/300	0.0223011	0.187433	0	0	2.87197	10.9225	RPL5;RPS14;RPL30;RPL27A;RPS21;PFDN5
intermediate stratum of DTTh	6/300	0.0223011	0.187433	0	0	2.87197	10.9225	CDKN1A;RPS19;ARPC2;PABPC4;RPL37A;RPS12
intermediate stratum of r8BL	6/300	0.0223011	0.187433	0	0	2.87197	10.9225	IL1RN;HSP90AB1;H2AFY;RPL11;HNRNPU;ACTB
lateral part of alar p2	6/300	0.0223011	0.187433	0	0	2.87197	10.9225	CDKN1A;RPS19;ARPC2;PABPC4;MMP9;RPS12
lateral part of r6B	6/300	0.0223011	0.187433	0	0	2.87197	10.9225	HSP90AB1;APLP2;PSAP;HNRNPU;SQSTM1;GAPDH
lateral part of r8B	6/300	0.0223011	0.187433	0	0	2.87197	10.9225	IL1RN;H2AFY;APLP2;RPL11;HNRNPU;ACTB
layer 1 of LPrP cortex	6/300	0.0223011	0.187433	0	0	2.87197	10.9225	CD63;RPS8;PRDX1;RPS11;EEF2;CTSD
layer 1 of OCx	6/300	0.0223011	0.187433	0	0	2.87197	10.9225	CD81;RPS6;ND3;EEF2;CTSD;EIF4G2
layer 4 of PCx	6/300	0.0223011	0.187433	0	0	2.87197	10.9225	CD81;NRG4;HMGA1;DBI;TIMP1;RPS24
mantle zone of DTTh	6/300	0.0223011	0.187433	0	0	2.87197	10.9225	CDKN1A;RPS19;PABPC4;RPL37A;MMP9;RPS12
mantle zone of FCx	6/300	0.0223011	0.187433	0	0	2.87197	10.9225	CD63;BTG1;ARPC2;CD81;DBI;RPS24
mantle zone of S	6/300	0.0223011	0.187433	0	0	2.87197	10.9225	ARPC2;NRG4;SDC2;S100A6;SPP1;TIMP1
mantle zone of r10Tr	6/300	0.0223011	0.187433	0	0	2.87197	10.9225	RPS14;CD63;HSP90AA1;GRN;RPS3;PHLDA1
mantle zone of r6BL	6/300	0.0223011	0.187433	0	0	2.87197	10.9225	HSP90AB1;APLP2;PSAP;HNRNPU;SQSTM1;GAPDH
mantle zone of r6Ve	6/300	0.0223011	0.187433	0	0	2.87197	10.9225	ARPC2;H2AFY;RPL11;RPS3;HNRNPU;RPS21
mantle zone of r8BL	6/300	0.0223011	0.187433	0	0	2.87197	10.9225	IL1RN;H2AFY;APLP2;RPL11;HNRNPU;ACTB
mantle zone of r9Tr	6/300	0.0223011	0.187433	0	0	2.87197	10.9225	CD63;GRN;H2AFY;RPL11;RPS3;RPS21
r10 basal plate	6/300	0.0223011	0.187433	0	0	2.87197	10.9225	RPS14;H2AFY;PSAP;RPS3;CALR;SQSTM1
r10 part of the trigeminal column	6/300	0.0223011	0.187433	0	0	2.87197	10.9225	RPS14;CD63;HSP90AA1;GRN;RPS3;PHLDA1
r8 part of basolateral reticular formation	6/300	0.0223011	0.187433	0	0	2.87197	10.9225	IL1RN;HSP90AB1;H2AFY;RPL11;HNRNPU;ACTB
r8 part of lateral reticular nucleus	6/300	0.0223011	0.187433	0	0	2.87197	10.9225	IL1RN;RPL31;APLP2;HNRNPU;SMAP2;ACTB
r9 part of the trigeminal column	6/300	0.0223011	0.187433	0	0	2.87197	10.9225	CD63;GRN;H2AFY;RPL11;RPS3;RPS21
rhombomere 10	6/300	0.0223011	0.187433	0	0	2.87197	10.9225	RPS14;PSAP;RPL11;RPS3;PHLDA1;ACTG1
striatal part of olfactory tuberculum	6/300	0.0223011	0.187433	0	0	2.87197	10.9225	CD63;CD81;RPS8;PRDX1;RPL37A;MSN
sublayer 6b of OCx	6/300	0.0223011	0.187433	0	0	2.87197	10.9225	ARPC2;NRG4;SDC2;HMGA1;SPP1;MMP9
superficial stratum of PO2	6/300	0.0223011	0.187433	0	0	2.87197	10.9225	HSP90AA1;HSP90AB1;RPS6;ENO1;CTSD;ATP5L
superficial stratum of Str	6/300	0.0223011	0.187433	0	0	2.87197	10.9225	CD63;CD81;RPS8;PRDX1;RPL37A;MSN
superficial stratum of THyB-D	6/300	0.0223011	0.187433	0	0	2.87197	10.9225	ARPC2;APLP2;CSDE1;ATP5G3;EEF2;ATP5L
superficial stratum of r8BL	6/300	0.0223011	0.187433	0	0	2.87197	10.9225	IL1RN;RPL31;APLP2;HNRNPU;SMAP2;ACTB
superficial stratum of r9BL	6/300	0.0223011	0.187433	0	0	2.87197	10.9225	IL1RN;RPL31;APLP2;CANX;SMAP2;ACTB
ventral nuclei	6/300	0.0223011	0.187433	0	0	2.87197	10.9225	CDKN1A;RPS19;PABPC4;RPL37A;TIMP1;RPS12
ventral posterolateral nucleus	6/300	0.0223011	0.187433	0	0	2.87197	10.9225	RPL30;CDKN1A;ARPC2;TIMP1;MMP9;RPS12
Inferior colliculus	6/362	0.0485878	0.362764	0	0	2.36428	7.15048	RPS19;ARPC2;ACTN4;YBX1;RPS21;ACTG1
Thalamus	6/367	0.0512954	0.362764	0	0	2.33094	6.92324	CDKN1A;RPS19;ARPC2;PABPC4;MMP9;RPS12
AOB, granular layer	5/300	0.0676545	0.362764	0	0	2.36804	6.37794	YWHAB;ATP5G3;EEF2;RPS21;RPS24
AOB, mitral cell layer	5/300	0.0676545	0.362764	0	0	2.36804	6.37794	YWHAB;ATP5G3;EEF2;RPS21;RPS24
Anterior cingulate area	5/300	0.0676545	0.362764	0	0	2.36804	6.37794	ARPC2;RPL35A;DBI;RPL37;RPS24
Anteromedial visual area	5/300	0.0676545	0.362764	0	0	2.36804	6.37794	RPL30;HMGA1;DBI;MMP9;RPS12
Cerebellar nuclei	5/300	0.0676545	0.362764	0	0	2.36804	6.37794	RPL5;RPL27A;RPL11;RPS21;PFDN5
Cerebral cortex	5/300	0.0676545	0.362764	0	0	2.36804	6.37794	CD81;PRDX1;HMGA1;DBI;RPS24
Cerebrum	5/300	0.0676545	0.362764	0	0	2.36804	6.37794	ARPC2;CD81;PRDX1;HMGA1;RPS24
Cochlear nucleus, subpedunclular granular region	5/300	0.0676545	0.362764	0	0	2.36804	6.37794	RPL5;GDF15;RPL27A;RPL35A;RPS11
Cortical plate	5/300	0.0676545	0.362764	0	0	2.36804	6.37794	CD81;PRDX1;HMGA1;DBI;RPS24
Entorhinal area, lateral part, layer 2a	5/300	0.0676545	0.362764	0	0	2.36804	6.37794	RPL5;RPS14;RAB31;APLP2;PFDN5
Gustatory areas, layer 2/3	5/300	0.0676545	0.362764	0	0	2.36804	6.37794	ARPC2;HMGA1;TAGLN2;RPS11;RPS24
Inferior colliculus, external nucleus	5/300	0.0676545	0.362764	0	0	2.36804	6.37794	RPL30;RPL37A;ACTN4;YBX1;RPS12
Interanterodorsal nucleus of the thalamus	5/300	0.0676545	0.362764	0	0	2.36804	6.37794	ARPC2;PABPC4;RPL35A;TAGLN2;RPS12
Isocortex	5/300	0.0676545	0.362764	0	0	2.36804	6.37794	CD81;SDC2;HMGA1;DBI;RPS24
Lateral group of the dorsal thalamus	5/300	0.0676545	0.362764	0	0	2.36804	6.37794	CDKN1A;ARPC2;RPL37A;PLIN2;RPS12
Main olfactory bulb, granule layer	5/300	0.0676545	0.362764	0	0	2.36804	6.37794	RPS8;RPS6;FAU;EEF2;RPS24
Main olfactory bulb, inner plexiform layer	5/300	0.0676545	0.362764	0	0	2.36804	6.37794	RPS8;RPS6;RPS11;EEF2;RPS24
Medial group of the dorsal thalamus	5/300	0.0676545	0.362764	0	0	2.36804	6.37794	RPS19;PABPC4;RPL35A;HLA-A;RPS12
Olfactory tubercle	5/300	0.0676545	0.362764	0	0	2.36804	6.37794	CD81;RPS8;PRDX1;EEF2;RHOA
Orbital area, medial part, layer 2/3	5/300	0.0676545	0.362764	0	0	2.36804	6.37794	CD81;EEF2;PHLDA1;RPS24;ZMPSTE24
Paragigantocellular reticular nucleus, lateral part	5/300	0.0676545	0.362764	0	0	2.36804	6.37794	RPL31;APLP2;PSAP;HNRNPU;SMAP2
Parapyramidal nucleus	5/300	0.0676545	0.362764	0	0	2.36804	6.37794	HSP90AB1;PSAP;ND3;SMAP2;SQSTM1
Parasubiculum, layer 1	5/300	0.0676545	0.362764	0	0	2.36804	6.37794	CHCHD2;TUBA1B;CANX;FAU;ACTB
Piriform-amygdalar area	5/300	0.0676545	0.362764	0	0	2.36804	6.37794	IL1RN;PRDX1;IL1B;HSPG2;PFDN5
Posterior complex of the thalamus	5/300	0.0676545	0.362764	0	0	2.36804	6.37794	RPS19;FTH1;PABPC4;RPL37A;RPS12
Posterior parietal association areas	5/300	0.0676545	0.362764	0	0	2.36804	6.37794	ARPC2;NRG4;HMGA1;DBI;MMP9
Primary somatosensory area	5/300	0.0676545	0.362764	0	0	2.36804	6.37794	CD81;NRG4;HMGA1;TIMP1;ND3
Primary somatosensory area, barrel field, layer 4	5/300	0.0676545	0.362764	0	0	2.36804	6.37794	NRG4;PABPC4;HMGA1;TIMP1;RPS24
Primary somatosensory area, mouth	5/300	0.0676545	0.362764	0	0	2.36804	6.37794	CDKN1A;CD81;PABPC4;RGS16;HMGA1
Primary somatosensory area, mouth, layer 5	5/300	0.0676545	0.362764	0	0	2.36804	6.37794	CDKN1A;PABPC4;RGS16;HMGA1;RPS24
Primary somatosensory area, trunk, layer 4	5/300	0.0676545	0.362764	0	0	2.36804	6.37794	CD81;NRG4;HMGA1;DBI;ZMPSTE24
Primary somatosensory area, trunk, layer 5	5/300	0.0676545	0.362764	0	0	2.36804	6.37794	NRG4;HMGA1;DBI;MMP9;RPS12
Primary somatosensory area, unassigned	5/300	0.0676545	0.362764	0	0	2.36804	6.37794	CD81;PRDX1;PABPC4;RGS16;HMGA1
Primary visual area	5/300	0.0676545	0.362764	0	0	2.36804	6.37794	NRG4;HMGA1;DBI;TIMP1;ZMPSTE24
Primary visual area, layer 6a	5/300	0.0676545	0.362764	0	0	2.36804	6.37794	NRG4;HMGA1;SPP1;MMP9;ZMPSTE24
Retrosplenial area, dorsal part, layer 6a	5/300	0.0676545	0.362764	0	0	2.36804	6.37794	FCER1G;SDC2;SPP1;DBI;MMP9
Retrosplenial area, lateral agranular part	5/300	0.0676545	0.362764	0	0	2.36804	6.37794	ARPC2;SDC2;DBI;EEF2;MMP9
Retrosplenial area, ventral part, layer 1	5/300	0.0676545	0.362764	0	0	2.36804	6.37794	RPS19;RPL35A;LCP1;RPS12;ZMPSTE24
Secondary motor area, layer 5	5/300	0.0676545	0.362764	0	0	2.36804	6.37794	RAB31;CD81;SDC2;DBI;RPS24
Somatosensory areas	5/300	0.0676545	0.362764	0	0	2.36804	6.37794	CD81;NRG4;HMGA1;TIMP1;ND3
Spinal nucleus of the trigeminal, caudal part	5/300	0.0676545	0.362764	0	0	2.36804	6.37794	HSP90AA1;GRN;RPS3;YBX1;RPS21
Subiculum, dorsal part, pyramidal layer	5/300	0.0676545	0.362764	0	0	2.36804	6.37794	SDC2;S100A6;HMGA1;SPP1;MMP9
Subiculum, dorsal part, stratum radiatum	5/300	0.0676545	0.362764	0	0	2.36804	6.37794	TUBA1B;S100A6;SPP1;ND3;IER3
Substantia nigra, reticular part	5/300	0.0676545	0.362764	0	0	2.36804	6.37794	RPL30;CHCHD2;RPL15;RPS27A;TPT1
Superior colliculus, sensory related	5/300	0.0676545	0.362764	0	0	2.36804	6.37794	RPS19;RPL35A;ACTN4;LCP1;RPS12
Superior colliculus, superficial gray layer	5/300	0.0676545	0.362764	0	0	2.36804	6.37794	RPS19;RPL35A;ACTN4;LCP1;RPS12
alar plate of p2 (alar thalamus)	5/300	0.0676545	0.362764	0	0	2.36804	6.37794	CDKN1A;RPS19;PABPC4;MMP9;RPS12
anteroventral part of alar thalamus	5/300	0.0676545	0.362764	0	0	2.36804	6.37794	CDKN1A;S100A6;ACTN4;B2M;MMP9
central nucleus of the inferior colliculus	5/300	0.0676545	0.362764	0	0	2.36804	6.37794	RPS19;ACTN4;YBX1;RPS21;ACTG1
colliculus superior	5/300	0.0676545	0.362764	0	0	2.36804	6.37794	RPS19;ARPC2;ACTN4;YBX1;LCP1
episupraoptic nucleus	5/300	0.0676545	0.362764	0	0	2.36804	6.37794	HSP90AA1;HSP90AB1;RPS6;GAPDH;ATP5L
forebrain	5/300	0.0676545	0.362764	0	0	2.36804	6.37794	CD81;PRDX1;HMGA1;SPP1;RPS24
frontal cortex	5/300	0.0676545	0.362764	0	0	2.36804	6.37794	CD63;BTG1;CD81;DBI;RPS24
intermediate stratum of IC	5/300	0.0676545	0.362764	0	0	2.36804	6.37794	RPS19;ACTN4;YBX1;RPS21;ACTG1
intermediate stratum of SC	5/300	0.0676545	0.362764	0	0	2.36804	6.37794	RPS19;SDC2;ACTN4;YBX1;LCP1
intermediate stratum of p2ZL	5/300	0.0676545	0.362764	0	0	2.36804	6.37794	FCER1G;ARPC2;S100A6;TAGLN2;TIMP1
intermediate stratum of r10Lim	5/300	0.0676545	0.362764	0	0	2.36804	6.37794	TYROBP;H2AFY;RPL11;RPS3;RPS21
intermediate stratum of r8Ve	5/300	0.0676545	0.362764	0	0	2.36804	6.37794	H2AFY;RPL11;RPS3;PHLDA1;RPS21
intermediate stratum of r9BL	5/300	0.0676545	0.362764	0	0	2.36804	6.37794	MMP14;H2AFY;SDC2;LAPTM5;RPS21
internal cortical nucleus of inferior colliculus	5/300	0.0676545	0.362764	0	0	2.36804	6.37794	RPL30;RPL37A;ACTN4;YBX1;RPS12
layer 1 of AOD cortex	5/300	0.0676545	0.362764	0	0	2.36804	6.37794	CD81;RPS8;ATP5G3;EEF2;RPS24
layer 1 of LOT	5/300	0.0676545	0.362764	0	0	2.36804	6.37794	CHCHD2;MYL6;RPL15;PFDN5;ACTG1
layer 2 of OCx	5/300	0.0676545	0.362764	0	0	2.36804	6.37794	ARPC2;CD81;HMGA1;DBI;EEF2
layer 4 of OCx	5/300	0.0676545	0.362764	0	0	2.36804	6.37794	SDC2;HMGA1;DBI;TIMP1;MMP9
layer 5 of FCx	5/300	0.0676545	0.362764	0	0	2.36804	6.37794	CD63;BTG1;SDC2;DBI;RPS24
layer 5 of OCx	5/300	0.0676545	0.362764	0	0	2.36804	6.37794	NRG4;SDC2;SPP1;DBI;MMP9
layer 5 of PCx	5/300	0.0676545	0.362764	0	0	2.36804	6.37794	NRG4;SDC2;PABPC4;HMGA1;DBI
layer 6 of OCx	5/300	0.0676545	0.362764	0	0	2.36804	6.37794	NRG4;SDC2;HMGA1;SPP1;MMP9
mantle zone of AOB	5/300	0.0676545	0.362764	0	0	2.36804	6.37794	YWHAB;ATP5G3;EEF2;RPS21;RPS24
mantle zone of IC	5/300	0.0676545	0.362764	0	0	2.36804	6.37794	RPS19;ACTN4;YBX1;RPS21;ACTG1
mantle zone of OCx	5/300	0.0676545	0.362764	0	0	2.36804	6.37794	NRG4;SDC2;HMGA1;DBI;MMP9
mantle zone of r11Tr	5/300	0.0676545	0.362764	0	0	2.36804	6.37794	HSP90AA1;GRN;RPS11;PHLDA1;PFDN5
mantle zone of r1Tr	5/300	0.0676545	0.362764	0	0	2.36804	6.37794	RPL30;ARPC2;PLAUR;TAGLN2;YBX1
mantle zone of r7Tr	5/300	0.0676545	0.362764	0	0	2.36804	6.37794	ARPC2;H2AFY;RPL11;RPS3;RPS21
mantle zone of r8Ve	5/300	0.0676545	0.362764	0	0	2.36804	6.37794	H2AFY;RPL11;RPS3;PHLDA1;RPS21
mantle zone of r9Ve	5/300	0.0676545	0.362764	0	0	2.36804	6.37794	RPL11;RPS3;PHLDA1;RPS21;ACTG1
medial geniculate nucleus	5/300	0.0676545	0.362764	0	0	2.36804	6.37794	CDKN1A;NRG4;SLC20A1;ND3;ZMPSTE24
medullary hindbrain (medulla)	5/300	0.0676545	0.362764	0	0	2.36804	6.37794	H2AFY;PSAP;RPL11;RPS3;HNRNPU
nucleus sagulum, superficial part	5/300	0.0676545	0.362764	0	0	2.36804	6.37794	RPL30;RPL37A;SH3BGRL3;YBX1;RPS12
occipital cortex	5/300	0.0676545	0.362764	0	0	2.36804	6.37794	NRG4;SDC2;HMGA1;DBI;MMP9
pallium	5/300	0.0676545	0.362764	0	0	2.36804	6.37794	ARPC2;CD81;PRDX1;HMGA1;RPS24
periventricular stratum of AOB	5/300	0.0676545	0.362764	0	0	2.36804	6.37794	YWHAB;ATP5G3;EEF2;RPS21;RPS24
plexiform layer of TuPal	5/300	0.0676545	0.362764	0	0	2.36804	6.37794	RAB31;CD81;DBI;RPL15;EEF2
preopto-hypothalamic area	5/300	0.0676545	0.362764	0	0	2.36804	6.37794	ENO1;PFN1;RLF;SERF2;ATP5L
pyramidal layer of S	5/300	0.0676545	0.362764	0	0	2.36804	6.37794	NRG4;SDC2;S100A6;SPP1;TIMP1
r1 part of principal trigeminal sensory nucleus	5/300	0.0676545	0.362764	0	0	2.36804	6.37794	RPL30;ARPC2;RPL27A;TAGLN2;RPS11
r10 part of spinal trigeminal nucleus, caudal part	5/300	0.0676545	0.362764	0	0	2.36804	6.37794	HSP90AA1;RPL31;RPL11;RPS11;RPS21
r10 part of ventral parvicellular reticular formation	5/300	0.0676545	0.362764	0	0	2.36804	6.37794	TYROBP;H2AFY;RPL11;RPS3;RPS21
r11 part of spinal trigeminal nucleus, caudal part	5/300	0.0676545	0.362764	0	0	2.36804	6.37794	HSP90AA1;GRN;RPS11;PHLDA1;PFDN5
r11 part of the trigeminal column	5/300	0.0676545	0.362764	0	0	2.36804	6.37794	HSP90AA1;GRN;RPS11;PHLDA1;PFDN5
r5 part of posteroventral cochlear nucleus	5/300	0.0676545	0.362764	0	0	2.36804	6.37794	RPS14;LASP1;RPS16;SMAP2;OAZ1
r6 part of spinal trigeminal nucleus, pars oralis	5/300	0.0676545	0.362764	0	0	2.36804	6.37794	RPL30;ARPC2;RPL31;RPL27A;RPS3
r6 part of spinal vestibular nucleus	5/300	0.0676545	0.362764	0	0	2.36804	6.37794	ARPC2;H2AFY;RPS3;HNRNPU;RPS21
r6 part of the vestibular column	5/300	0.0676545	0.362764	0	0	2.36804	6.37794	H2AFY;RPL11;RPS3;HNRNPU;RPS21
r7 alar plate	5/300	0.0676545	0.362764	0	0	2.36804	6.37794	H2AFY;RPL11;RPS3;HNRNPU;RPS21
r8 basal plate	5/300	0.0676545	0.362764	0	0	2.36804	6.37794	H2AFY;PSAP;RPS3;HNRNPU;CALR
r8 part of spinal vestibular nucleus	5/300	0.0676545	0.362764	0	0	2.36804	6.37794	H2AFY;RPL11;RPS3;PHLDA1;RPS21
r8 part of the trigeminal column	5/300	0.0676545	0.362764	0	0	2.36804	6.37794	ARPC2;H2AFY;RPL11;RPS3;RPS21
r8 part of the vestibular column	5/300	0.0676545	0.362764	0	0	2.36804	6.37794	H2AFY;RPL11;RPS3;PHLDA1;RPS21
r9 alar plate	5/300	0.0676545	0.362764	0	0	2.36804	6.37794	GRN;H2AFY;RPL11;RPS3;RPS21
r9 basal plate	5/300	0.0676545	0.362764	0	0	2.36804	6.37794	H2AFY;PSAP;RPS3;HNRNPU;CALR
r9 part of the basolateral reticular formation	5/300	0.0676545	0.362764	0	0	2.36804	6.37794	MMP14;H2AFY;SDC2;LAPTM5;RPS21
r9 part of the vestibular column	5/300	0.0676545	0.362764	0	0	2.36804	6.37794	RPL11;RPS3;PHLDA1;RPS21;ACTG1
rhombomere 7	5/300	0.0676545	0.362764	0	0	2.36804	6.37794	H2AFY;PSAP;RPL11;RPS3;HNRNPU
rostral ventrolateral reticular area	5/300	0.0676545	0.362764	0	0	2.36804	6.37794	RPL31;APLP2;PSAP;SMAP2;ACTB
shell part of the anterobasal nucleus	5/300	0.0676545	0.362764	0	0	2.36804	6.37794	APLP2;CSDE1;ATP5G3;EEF2;ATP5L
sublayer 6a of OCx	5/300	0.0676545	0.362764	0	0	2.36804	6.37794	SDC2;HMGA1;SPP1;DBI;MMP9
suboptic nucleus	5/300	0.0676545	0.362764	0	0	2.36804	6.37794	HSP90AA1;APLP2;CSDE1;ATP5G3;EEF2
superficial stratum of DTTh	5/300	0.0676545	0.362764	0	0	2.36804	6.37794	CDKN1A;SDC2;SPP1;PLIN2;MMP9
superficial stratum of FCx (cortical plate/marginal zone)	5/300	0.0676545	0.362764	0	0	2.36804	6.37794	CD63;BTG1;CD81;DBI;RPS24
superficial stratum of ITTh	5/300	0.0676545	0.362764	0	0	2.36804	6.37794	CDKN1A;SPP1;TIMP1;ND3;MMP9
superficial stratum of OCx (cortical plate/marginal zone)	5/300	0.0676545	0.362764	0	0	2.36804	6.37794	NRG4;SDC2;HMGA1;DBI;MMP9
superficial stratum of POH	5/300	0.0676545	0.362764	0	0	2.36804	6.37794	HSP90AA1;HSP90AB1;RPS6;GAPDH;ATP5L
superficial stratum of S	5/300	0.0676545	0.362764	0	0	2.36804	6.37794	NRG4;SDC2;S100A6;SPP1;TIMP1
superficial stratum of VTTh	5/300	0.0676545	0.362764	0	0	2.36804	6.37794	CDKN1A;NRG4;SLC20A1;ND3;ZMPSTE24
superficial stratum of m2ADL	5/300	0.0676545	0.362764	0	0	2.36804	6.37794	RPL30;RPL37A;SH3BGRL3;YBX1;RPS12
superficial stratum of r11Tr	5/300	0.0676545	0.362764	0	0	2.36804	6.37794	HSP90AA1;GRN;RPS11;PHLDA1;PFDN5
superficial stratum of r5Co	5/300	0.0676545	0.362764	0	0	2.36804	6.37794	RPS14;LASP1;RPS16;SMAP2;OAZ1
superficial stratum of r7BL	5/300	0.0676545	0.362764	0	0	2.36804	6.37794	RPL31;APLP2;PSAP;SMAP2;ACTB
ventral subnucleus of MG	5/300	0.0676545	0.362764	0	0	2.36804	6.37794	CDKN1A;NRG4;SLC20A1;ND3;ZMPSTE24
Field CA1, stratum oriens	6/409	0.0776523	0.415141	0	0	2.08351	5.32444	FCER1G;NRG4;PABPC4;HMGA1;SPP1;TIMP1
Tuberal nucleus	6/448	0.107867	0.57497	0	0	1.89586	4.22182	ARPC2;APLP2;CSDE1;ATP5G3;EEF2;ATP5L
Field CA3, stratum radiatum	5/364	0.12561	0.582026	0	0	1.93951	4.02366	CDKN1A;RAB31;SDC2;SPP1;IER3
Subiculum	5/377	0.139537	0.582026	0	0	1.87049	3.68379	NRG4;SDC2;S100A6;SPP1;TIMP1
Field CA1	5/378	0.140636	0.582026	0	0	1.86538	3.65909	NRG4;GDF15;SPP1;TIMP1;ND3
Field CA3, stratum lacunosum-moleculare	6/491	0.147216	0.582026	0	0	1.72395	3.30284	CDKN1A;RAB31;GDF15;PLIN2;ND3;IER3
Accessory olfactory bulb	5/387	0.150694	0.582026	0	0	1.82059	3.44547	YWHAB;ATP5G3;EEF2;RPS21;RPS24
AOB, glomerular layer	4/300	0.173931	0.582026	0	0	1.87454	3.27876	RPS8;ATP5G3;EEF2;RPS24
AOB, internal plexiform layer	4/300	0.173931	0.582026	0	0	1.87454	3.27876	ATP5G3;EEF2;RPS21;RPS24
AOB, outer plexiform layer	4/300	0.173931	0.582026	0	0	1.87454	3.27876	ATP5G3;EEF2;RPS21;RPS24
Accessory olfactory bulb, glomerular layer	4/300	0.173931	0.582026	0	0	1.87454	3.27876	YWHAB;EEF2;RPS21;RPS24
Accessory olfactory bulb, granular layer	4/300	0.173931	0.582026	0	0	1.87454	3.27876	ATP5G3;EEF2;RPS21;RPS24
Accessory olfactory bulb, mitral layer	4/300	0.173931	0.582026	0	0	1.87454	3.27876	ATP5G3;EEF2;RPS21;RPS24
Agranular insular area, dorsal part	4/300	0.173931	0.582026	0	0	1.87454	3.27876	CD63;PRDX1;RGS16;HMGA1
Anterior cingulate area, dorsal part, layer 1	4/300	0.173931	0.582026	0	0	1.87454	3.27876	RPL35A;DBI;CTSD;RPS24
Anterior cingulate area, dorsal part, layer 2/3	4/300	0.173931	0.582026	0	0	1.87454	3.27876	ARPC2;RPL35A;DBI;RPS24
Anterior cingulate area, ventral part, layer 2/3	4/300	0.173931	0.582026	0	0	1.87454	3.27876	ARPC2;RPL35A;DBI;RPL37
Anteromedial nucleus, dorsal part	4/300	0.173931	0.582026	0	0	1.87454	3.27876	RPS19;PABPC4;TAGLN2;RPS12
Anteromedial visual area, layer 4	4/300	0.173931	0.582026	0	0	1.87454	3.27876	RPL30;HMGA1;DBI;MMP9
Anteromedial visual area, layer 5	4/300	0.173931	0.582026	0	0	1.87454	3.27876	ARPC2;HMGA1;DBI;MMP9
Anteromedial visual area, layer 6b	4/300	0.173931	0.582026	0	0	1.87454	3.27876	RPL30;PABPC4;MMP9;ZMPSTE24
Bed nucleus of the accessory olfactory tract	4/300	0.173931	0.582026	0	0	1.87454	3.27876	RPL30;HSP90AA1;SLC20A1;PFDN5
Caudoputamen	4/300	0.173931	0.582026	0	0	1.87454	3.27876	SLC20A1;FAU;MMP9;RPS24
Central lobule	4/300	0.173931	0.582026	0	0	1.87454	3.27876	TUBA1B;RPL23;RPL35A;EIF4G2
Cerebral nuclei	4/300	0.173931	0.582026	0	0	1.87454	3.27876	CDKN1A;ARPC2;SLC20A1;FAU
Cortical amygdalar area, anterior part, layer 1	4/300	0.173931	0.582026	0	0	1.87454	3.27876	DBI;RPL15;SQSTM1;ACTG1
Dentate gyrus, granule cell layer	4/300	0.173931	0.582026	0	0	1.87454	3.27876	RAB31;SLC20A1;SPP1;ND3
Dentate gyrus, polymorph layer	4/300	0.173931	0.582026	0	0	1.87454	3.27876	RAB31;SLC20A1;SPP1;ND3
External cuneate nucleus	4/300	0.173931	0.582026	0	0	1.87454	3.27876	RPL5;H2AFY;RPS3;RPS21
Fastigial nucleus	4/300	0.173931	0.582026	0	0	1.87454	3.27876	RPL5;RPS19;PHLDA1;RPS21
Gustatory areas, layer 1	4/300	0.173931	0.582026	0	0	1.87454	3.27876	HMGA1;TAGLN2;RPS11;RPS24
Inferior colliculus, central nucleus	4/300	0.173931	0.582026	0	0	1.87454	3.27876	ACTN4;YBX1;RPS21;ACTG1
Interposed nucleus	4/300	0.173931	0.582026	0	0	1.87454	3.27876	RPL5;RPL30;RPS3;RPS21
Lobule III, granular layer	4/300	0.173931	0.582026	0	0	1.87454	3.27876	TUBA1B;RPL23;RPL27A;RPL35A
Medial amygdalar nucleus	4/300	0.173931	0.582026	0	0	1.87454	3.27876	SLC20A1;S100A4;PFN1;RHOA
Medial amygdalar nucleus, anterodorsal part	4/300	0.173931	0.582026	0	0	1.87454	3.27876	SLC20A1;FTH1;S100A4;PFN1
Medial amygdalar nucleus, posterodorsal part	4/300	0.173931	0.582026	0	0	1.87454	3.27876	FTH1;S100A4;SERF2;RHOA
Medial geniculate complex	4/300	0.173931	0.582026	0	0	1.87454	3.27876	CDKN1A;NRG4;SLC20A1;ZMPSTE24
Medial geniculate complex, dorsal part	4/300	0.173931	0.582026	0	0	1.87454	3.27876	CDKN1A;SLC20A1;PFDN5;ZMPSTE24
Medial geniculate complex, ventral part	4/300	0.173931	0.582026	0	0	1.87454	3.27876	CDKN1A;NRG4;SLC20A1;ZMPSTE24
Mediodorsal nucleus of thalamus	4/300	0.173931	0.582026	0	0	1.87454	3.27876	RPS19;PABPC4;RPL35A;RPS12
Medulla, sensory related	4/300	0.173931	0.582026	0	0	1.87454	3.27876	RPS14;H2AFY;RPS3;RPS21
Midbrain, sensory related	4/300	0.173931	0.582026	0	0	1.87454	3.27876	RPS19;ACTN4;ACTG1;RPS12
Nodulus (X), granular layer	4/300	0.173931	0.582026	0	0	1.87454	3.27876	RPL5;TUBA1B;RPL23;RPL11
Nodulus (X), molecular layer	4/300	0.173931	0.582026	0	0	1.87454	3.27876	TUBA1B;RPL11;PHLDA1;ACTG1
Nucleus of the lateral lemniscus, ventral part	4/300	0.173931	0.582026	0	0	1.87454	3.27876	RPL30;CSDE1;PLAUR;RPS27A
Olfactory tubercle, polymorph layer	4/300	0.173931	0.582026	0	0	1.87454	3.27876	CD63;CD81;RPS8;PRDX1
Orbital area, ventrolateral part, layer 1	4/300	0.173931	0.582026	0	0	1.87454	3.27876	RPS8;ATP5G3;EEF2;RPS24
Parabrachial nucleus, medial division	4/300	0.173931	0.582026	0	0	1.87454	3.27876	MMP14;ARPC2;TAGLN2;TIMP1
Periventricular region	4/300	0.173931	0.582026	0	0	1.87454	3.27876	SLC20A1;ENO1;SERF2;ATP5L
Piriform area, molecular layer	4/300	0.173931	0.582026	0	0	1.87454	3.27876	CD63;PRDX1;RPS11;EEF2
Piriform-amygdalar area, molecular layer	4/300	0.173931	0.582026	0	0	1.87454	3.27876	IL1RN;HSP90AB1;IL1B;PFDN5
Piriform-amygdalar area, pyramidal layer	4/300	0.173931	0.582026	0	0	1.87454	3.27876	IL1RN;PRDX1;HSPG2;PFDN5
Posterior parietal association areas, layer 5	4/300	0.173931	0.582026	0	0	1.87454	3.27876	NRG4;HMGA1;DBI;MMP9
Postsubiculum, layer 1	4/300	0.173931	0.582026	0	0	1.87454	3.27876	RPL30;HMGA1;RPS12;ZMPSTE24
Primary motor area	4/300	0.173931	0.582026	0	0	1.87454	3.27876	CD63;BTG1;CD81;DBI
Primary motor area, Layer 5	4/300	0.173931	0.582026	0	0	1.87454	3.27876	CD63;BTG1;CD81;MMP9
Primary somatosensory area, lower limb, layer 4	4/300	0.173931	0.582026	0	0	1.87454	3.27876	RPL30;CD81;DBI;RPS12
Primary somatosensory area, lower limb, layer 5	4/300	0.173931	0.582026	0	0	1.87454	3.27876	RPL30;DBI;MMP9;RPS12
Primary somatosensory area, mouth, layer 4	4/300	0.173931	0.582026	0	0	1.87454	3.27876	CDKN1A;RGS16;HMGA1;RPS24
Primary somatosensory area, unassigned, layer 5	4/300	0.173931	0.582026	0	0	1.87454	3.27876	PRDX1;PABPC4;RGS16;HMGA1
Primary somatosensory area, upper limb, layer 4	4/300	0.173931	0.582026	0	0	1.87454	3.27876	CD81;PRDX1;HMGA1;RPS24
Primary somatosensory area, upper limb, layer 5	4/300	0.173931	0.582026	0	0	1.87454	3.27876	NRG4;RGS16;HMGA1;ZMPSTE24
Primary visual area, layer 4	4/300	0.173931	0.582026	0	0	1.87454	3.27876	PRDX1;HMGA1;DBI;ZMPSTE24
Reticular nucleus of the thalamus	4/300	0.173931	0.582026	0	0	1.87454	3.27876	CDKN1A;RPL37A;MMP9;RPS12
Retrosplenial area, dorsal part, layer 6b	4/300	0.173931	0.582026	0	0	1.87454	3.27876	RPL30;PABPC4;HMGA1;MMP9
Retrosplenial area, lateral agranular part, layer 5	4/300	0.173931	0.582026	0	0	1.87454	3.27876	SDC2;DBI;EEF2;MMP9
Secondary motor area	4/300	0.173931	0.582026	0	0	1.87454	3.27876	RAB31;CD81;DBI;RPS24
Spinal vestibular nucleus	4/300	0.173931	0.582026	0	0	1.87454	3.27876	H2AFY;RPL11;RPS3;RPS21
Striatum dorsal region	4/300	0.173931	0.582026	0	0	1.87454	3.27876	SLC20A1;FAU;MMP9;RPS24
Superior colliculus, motor related	4/300	0.173931	0.582026	0	0	1.87454	3.27876	ARPC2;ACTN4;YBX1;LCP1
Superior colliculus, motor related, intermediate gray layer	4/300	0.173931	0.582026	0	0	1.87454	3.27876	ACTN4;YBX1;LCP1;RPS12
Superior colliculus, optic layer	4/300	0.173931	0.582026	0	0	1.87454	3.27876	RPS19;ACTN4;LCP1;RPS12
Thalamus, sensory-motor cortex related	4/300	0.173931	0.582026	0	0	1.87454	3.27876	CDKN1A;S100A6;MMP9;RPS12
Ventral anterior-lateral complex of the thalamus	4/300	0.173931	0.582026	0	0	1.87454	3.27876	RPS19;PABPC4;TAGLN2;RPS12
alar plate of evaginated telencephalic vesicle	4/300	0.173931	0.582026	0	0	1.87454	3.27876	CD81;PRDX1;HMGA1;RPS24
alar plate of m1	4/300	0.173931	0.582026	0	0	1.87454	3.27876	RPS19;ACTN4;YBX1;LCP1
anterior nuclei	4/300	0.173931	0.582026	0	0	1.87454	3.27876	RPS19;PABPC4;RPL37A;RPS12
anterior part of Int	4/300	0.173931	0.582026	0	0	1.87454	3.27876	RPL5;RPL30;RPS27A;PFDN5
anteroventral nucleus	4/300	0.173931	0.582026	0	0	1.87454	3.27876	RPS19;PABPC4;RPL37A;RPS12
basal part of terminal hypothalamus	4/300	0.173931	0.582026	0	0	1.87454	3.27876	ARPC2;ATP5G3;EEF2;ATP5L
basomedial amygdaloid nucleus, anterior part	4/300	0.173931	0.582026	0	0	1.87454	3.27876	ARPC2;PRDX1;S100A4;HSPG2
caudal secondary prosencephalon	4/300	0.173931	0.582026	0	0	1.87454	3.27876	CD81;PRDX1;HMGA1;RPS24
caudal zona incerta	4/300	0.173931	0.582026	0	0	1.87454	3.27876	ARPC2;TAGLN2;ACTN4;YBX1
central layers of TG	4/300	0.173931	0.582026	0	0	1.87454	3.27876	RPS19;ACTN4;YBX1;RPS12
cerebellar nuclei of CbV	4/300	0.173931	0.582026	0	0	1.87454	3.27876	RPL5;RPS19;RPL11;RPS21
collicular (rostral) midbrain tectum	4/300	0.173931	0.582026	0	0	1.87454	3.27876	RPS19;ACTN4;YBX1;LCP1
dorsal cortical nucleus of inferior colliculus	4/300	0.173931	0.582026	0	0	1.87454	3.27876	RPS19;RPL35A;ACTN4;ACTG1
dorsal lateral geniculate nucleus	4/300	0.173931	0.582026	0	0	1.87454	3.27876	CDKN1A;S100A6;LAPTM5;ZMPSTE24
dorsal subnucleus of MG	4/300	0.173931	0.582026	0	0	1.87454	3.27876	NRG4;SLC20A1;ND3;ZMPSTE24
dorsolateral part of m1A	4/300	0.173931	0.582026	0	0	1.87454	3.27876	RPS19;ACTN4;YBX1;LCP1
external cortical nucleus of inferior colliculus	4/300	0.173931	0.582026	0	0	1.87454	3.27876	RPL37A;RPS21;ACTG1;RPS12
external part of AOV	4/300	0.173931	0.582026	0	0	1.87454	3.27876	RPS16;RPS6;RPL37A;RPS24
granule cell layer of the DG	4/300	0.173931	0.582026	0	0	1.87454	3.27876	SLC20A1;SPP1;ND3;ZMPSTE24
interanterodorsal nucleus	4/300	0.173931	0.582026	0	0	1.87454	3.27876	ARPC2;PRDX1;PABPC4;HLA-A
intermediate (interpositus) cerebellar nucleus	4/300	0.173931	0.582026	0	0	1.87454	3.27876	RPL5;RPL30;RPS21;PFDN5
intermediate stratum of AOB	4/300	0.173931	0.582026	0	0	1.87454	3.27876	ATP5G3;EEF2;RPS21;RPS24
intermediate stratum of ITTh	4/300	0.173931	0.582026	0	0	1.87454	3.27876	FCER1G;RPS19;RPL37A;PLIN2
intermediate stratum of POH	4/300	0.173931	0.582026	0	0	1.87454	3.27876	ENO1;PFN1;SERF2;ATP5L
intermediate stratum of TG	4/300	0.173931	0.582026	0	0	1.87454	3.27876	RPS19;ACTN4;YBX1;RPS12
intermediate stratum of cerebellar vermis	4/300	0.173931	0.582026	0	0	1.87454	3.27876	RPL5;RPS19;RPL11;RPS21
intermediate stratum of p1B	4/300	0.173931	0.582026	0	0	1.87454	3.27876	S100A6;MSN;TAGLN2;ACTN4
intermediate stratum of p2B	4/300	0.173931	0.582026	0	0	1.87454	3.27876	MSN;S100A4;TAGLN2;ACTN4
intermediate stratum of r10Ve	4/300	0.173931	0.582026	0	0	1.87454	3.27876	HSP90AA1;GRN;RPS11;PHLDA1
intermediate stratum of r7BL	4/300	0.173931	0.582026	0	0	1.87454	3.27876	IL1RN;RPL11;LAPTM5;HNRNPU
intermediate white layer of SC	4/300	0.173931	0.582026	0	0	1.87454	3.27876	RPS19;SDC2;ACTN4;YBX1
internal globus pallidus	4/300	0.173931	0.582026	0	0	1.87454	3.27876	CDKN1A;NRG4;FTH1;MMP9
interstitial nucleus of the zona limitans	4/300	0.173931	0.582026	0	0	1.87454	3.27876	FCER1G;S100A6;TAGLN2;TIMP1
intralaminar nuclei	4/300	0.173931	0.582026	0	0	1.87454	3.27876	RPS19;PABPC4;TIMP1;RPS12
lateral (dentate) cerebellar nucleus	4/300	0.173931	0.582026	0	0	1.87454	3.27876	RPS14;RPL27A;RPS11;RPS21
lateral anterior hypothalamic nucleus	4/300	0.173931	0.582026	0	0	1.87454	3.27876	ENO1;PFN1;SERF2;ATP5L
lateral pallium	4/300	0.173931	0.582026	0	0	1.87454	3.27876	ARPC2;PRDX1;HMGA1;EEF2
layer 3 of FCx	4/300	0.173931	0.582026	0	0	1.87454	3.27876	CD63;CD81;DBI;RPS24
layer 4 of CCx	4/300	0.173931	0.582026	0	0	1.87454	3.27876	ARPC2;PABPC4;TIMP1;RPS12
liminal part of the r10 alar plate	4/300	0.173931	0.582026	0	0	1.87454	3.27876	CD63;TYROBP;H2AFY;RPS3
liminal part of the r7 alar plate	4/300	0.173931	0.582026	0	0	1.87454	3.27876	MMP14;H2AFY;RPL11;HNRNPU
liminal part of the r9 alar plate	4/300	0.173931	0.582026	0	0	1.87454	3.27876	TYROBP;H2AFY;RPL11;RPS3
mantle zone of POH	4/300	0.173931	0.582026	0	0	1.87454	3.27876	ENO1;PFN1;SERF2;ATP5L
mantle zone of SC	4/300	0.173931	0.582026	0	0	1.87454	3.27876	RPS19;ACTN4;YBX1;LCP1
mantle zone of TG	4/300	0.173931	0.582026	0	0	1.87454	3.27876	RPS19;ACTN4;LCP1;RPS12
mantle zone of TPaA	4/300	0.173931	0.582026	0	0	1.87454	3.27876	ENO1;PFN1;SERF2;ATP5L
mantle zone of m2ADL	4/300	0.173931	0.582026	0	0	1.87454	3.27876	ARPC2;SH3BGRL3;ACTN4;YBX1
mantle zone of r10Lim	4/300	0.173931	0.582026	0	0	1.87454	3.27876	CD63;TYROBP;H2AFY;RPS3
mantle zone of r4Ve	4/300	0.173931	0.582026	0	0	1.87454	3.27876	H2AFY;RPS3;HNRNPU;RPS21
mantle zone of r5Ve	4/300	0.173931	0.582026	0	0	1.87454	3.27876	H2AFY;RPS3;HNRNPU;RPS21
mantle zone of r7Lim	4/300	0.173931	0.582026	0	0	1.87454	3.27876	MMP14;H2AFY;RPL11;HNRNPU
mantle zone of r7Ve	4/300	0.173931	0.582026	0	0	1.87454	3.27876	H2AFY;RPL11;RPS3;RPS21
mantle zone of r8BM	4/300	0.173931	0.582026	0	0	1.87454	3.27876	H2AFY;HNRNPU;B2M;CTSD
mantle zone of r8Tr	4/300	0.173931	0.582026	0	0	1.87454	3.27876	H2AFY;RPL11;RPS3;RPS21
mantle zone of r9BM	4/300	0.173931	0.582026	0	0	1.87454	3.27876	ARPC2;H2AFY;RPS3;CALR
mantle zone of r9Lim	4/300	0.173931	0.582026	0	0	1.87454	3.27876	TYROBP;H2AFY;RPL11;RPS3
medial (fastigial) cerebellar nucleus	4/300	0.173931	0.582026	0	0	1.87454	3.27876	RPL5;RPS19;RPL11;RPS21
medial (main) part of Med	4/300	0.173931	0.582026	0	0	1.87454	3.27876	RPL5;RPS19;RPL11;RPS21
medial part of r8B	4/300	0.173931	0.582026	0	0	1.87454	3.27876	H2AFY;HNRNPU;B2M;CTSD
medial tuberal nucleus	4/300	0.173931	0.582026	0	0	1.87454	3.27876	APLP2;ATP5G3;EEF2;ATP5L
mesomere 1	4/300	0.173931	0.582026	0	0	1.87454	3.27876	RPS19;ACTN4;YBX1;LCP1
p1 part of the substantia nigra reticulata	4/300	0.173931	0.582026	0	0	1.87454	3.27876	CHCHD2;RPL15;SMAP2;TPT1
p2 portion of the substantia nigra pars reticulata	4/300	0.173931	0.582026	0	0	1.87454	3.27876	RPL30;RPL15;RPS27A;TPT1
p3 portion of the substantia nigra pars reticulata	4/300	0.173931	0.582026	0	0	1.87454	3.27876	RPL30;RPL37A;RPL15;RPS27A
periventricular stratum of r2Co	4/300	0.173931	0.582026	0	0	1.87454	3.27876	RPL5;RPL27A;RPL35A;RPS11
pontomedullary hindbrain	4/300	0.173931	0.582026	0	0	1.87454	3.27876	H2AFY;RPS3;HNRNPU;GAPDH
posterior (ventral) nucleus	4/300	0.173931	0.582026	0	0	1.87454	3.27876	SDC2;PABPC4;RPL37A;RPS12
posterior part of Int	4/300	0.173931	0.582026	0	0	1.87454	3.27876	RPL5;RPL30;RPS3;RPS21
posterolateral cortical amygdaloid area	4/300	0.173931	0.582026	0	0	1.87454	3.27876	IL1RN;IL1B;HSPG2;PFDN5
posteromedial visual area	4/300	0.173931	0.582026	0	0	1.87454	3.27876	RPL30;HMGA1;DBI;RPS12
posteromedial visual area, layer 2/3	4/300	0.173931	0.582026	0	0	1.87454	3.27876	RPL30;RPS18;RPS6;RPS12
posteromedial visual area, layer 5	4/300	0.173931	0.582026	0	0	1.87454	3.27876	RPL30;HMGA1;DBI;RPS12
posteromedial visual area, layer 6a	4/300	0.173931	0.582026	0	0	1.87454	3.27876	HMGA1;DBI;MMP9;ZMPSTE24
preopto-hypothalamic band	4/300	0.173931	0.582026	0	0	1.87454	3.27876	ENO1;PFN1;SERF2;ATP5L
prerubral area	4/300	0.173931	0.582026	0	0	1.87454	3.27876	MSN;S100A4;TAGLN2;ACTN4
prosomere 2	4/300	0.173931	0.582026	0	0	1.87454	3.27876	CDKN1A;RPS19;MMP9;RPS12
r1 part of lateral pontine nuclei	4/300	0.173931	0.582026	0	0	1.87454	3.27876	CHCHD2;RPL27A;ATP5G3;GAPDH
r1 part of trigeminal sensory column	4/300	0.173931	0.582026	0	0	1.87454	3.27876	RPL30;PLAUR;TAGLN2;YBX1
r10 part of spinal vestibular nucleus	4/300	0.173931	0.582026	0	0	1.87454	3.27876	HSP90AA1;GRN;RPS11;PHLDA1
r2 alar plate	4/300	0.173931	0.582026	0	0	1.87454	3.27876	RPL30;RPL27A;RPS27A;GAPDH
r2 part of dorsal cochlear nucleus	4/300	0.173931	0.582026	0	0	1.87454	3.27876	RPL5;RPL27A;RPL35A;RPS11
r4 part of lateral vestibular nucleus	4/300	0.173931	0.582026	0	0	1.87454	3.27876	H2AFY;RPS3;HNRNPU;RPS21
r4 part of vestibular sensory column	4/300	0.173931	0.582026	0	0	1.87454	3.27876	H2AFY;RPS3;HNRNPU;RPS21
r5 part of spinal vestibular nucleus	4/300	0.173931	0.582026	0	0	1.87454	3.27876	H2AFY;RPS3;HNRNPU;RPS21
r5 part of the vestibular column	4/300	0.173931	0.582026	0	0	1.87454	3.27876	H2AFY;RPS3;HNRNPU;RPS21
r6 alar plate	4/300	0.173931	0.582026	0	0	1.87454	3.27876	H2AFY;RPL11;RPS3;HNRNPU
r6 part of rostral ventromedial reticular area	4/300	0.173931	0.582026	0	0	1.87454	3.27876	MYL6;PSAP;LAPTM5;ND3
r7 part of basolateral reticular formation	4/300	0.173931	0.582026	0	0	1.87454	3.27876	IL1RN;RPL11;LAPTM5;HNRNPU
r7 part of spinal vestibular nucleus	4/300	0.173931	0.582026	0	0	1.87454	3.27876	H2AFY;RPL11;RPS3;RPS21
r7 part of the trigeminal column	4/300	0.173931	0.582026	0	0	1.87454	3.27876	H2AFY;RPL11;RPS3;RPS21
r7 part of the vestibular column	4/300	0.173931	0.582026	0	0	1.87454	3.27876	H2AFY;RPL11;RPS3;RPS21
r8 alar plate	4/300	0.173931	0.582026	0	0	1.87454	3.27876	H2AFY;RPL11;RPS3;RPS21
r8 part of spinal trigeminal nucleus, interpolar part	4/300	0.173931	0.582026	0	0	1.87454	3.27876	GRN;RPS3;YBX1;RPS21
r9 part of gigantocellular reticular area	4/300	0.173931	0.582026	0	0	1.87454	3.27876	ARPC2;HNRNPU;CALR;B2M
retrotrapezoid nucleus	4/300	0.173931	0.582026	0	0	1.87454	3.27876	HSP90AB1;APLP2;SMAP2;SQSTM1
rhombomere 6	4/300	0.173931	0.582026	0	0	1.87454	3.27876	H2AFY;RPS3;HNRNPU;GAPDH
rhombomere 8	4/300	0.173931	0.582026	0	0	1.87454	3.27876	H2AFY;RPL11;RPS3;HNRNPU
rhombomere 9	4/300	0.173931	0.582026	0	0	1.87454	3.27876	RPS14;H2AFY;RPL11;RPS3
rostral secondary prosencephalon	4/300	0.173931	0.582026	0	0	1.87454	3.27876	ENO1;SERF2;RHOA;ATP5L
secondary prosencephalon	4/300	0.173931	0.582026	0	0	1.87454	3.27876	CD81;PRDX1;HMGA1;RPS24
substantia nigra reticulata, isthmic part	4/300	0.173931	0.582026	0	0	1.87454	3.27876	CHCHD2;HSP90AB1;SMAP2;GAPDH
superficial layers of TG	4/300	0.173931	0.582026	0	0	1.87454	3.27876	SH3BGRL3;ACTN4;LCP1;RPS12
superficial stratum of AOB	4/300	0.173931	0.582026	0	0	1.87454	3.27876	RPS8;ATP5G3;EEF2;RPS24
superficial stratum of IC	4/300	0.173931	0.582026	0	0	1.87454	3.27876	RPS19;ACTN4;RPS21;ACTG1
superficial stratum of Ist	4/300	0.173931	0.582026	0	0	1.87454	3.27876	RPL30;PLAUR;YBX1;RPS12
superficial stratum of TG	4/300	0.173931	0.582026	0	0	1.87454	3.27876	SH3BGRL3;ACTN4;LCP1;RPS12
superficial stratum of THyB-I	4/300	0.173931	0.582026	0	0	1.87454	3.27876	APLP2;ATP5G3;EEF2;ATP5L
superficial stratum of THyB-V	4/300	0.173931	0.582026	0	0	1.87454	3.27876	CAP1;APLP2;ATP5G3;EEF2
superficial stratum of isBI	4/300	0.173931	0.582026	0	0	1.87454	3.27876	CHCHD2;HSP90AB1;SMAP2;GAPDH
superficial stratum of p2ZL	4/300	0.173931	0.582026	0	0	1.87454	3.27876	CDKN1A;PABPC4;MMP9;ZMPSTE24
superficial stratum of r1BI	4/300	0.173931	0.582026	0	0	1.87454	3.27876	CHCHD2;RPL27A;ATP5G3;GAPDH
superficial stratum of r1Tr	4/300	0.173931	0.582026	0	0	1.87454	3.27876	RPL30;RPL27A;TAGLN2;RPS11
superficial stratum of r4Ve	4/300	0.173931	0.582026	0	0	1.87454	3.27876	H2AFY;RPS3;HNRNPU;RPS21
superficial stratum of r5Ve	4/300	0.173931	0.582026	0	0	1.87454	3.27876	H2AFY;RPS3;HNRNPU;RPS21
superficial stratum of r6BL	4/300	0.173931	0.582026	0	0	1.87454	3.27876	HSP90AB1;APLP2;SMAP2;SQSTM1
superficial stratum of r6Tr	4/300	0.173931	0.582026	0	0	1.87454	3.27876	RPL30;RPL31;RPL27A;RPS3
superficial stratum of r6Ve	4/300	0.173931	0.582026	0	0	1.87454	3.27876	H2AFY;RPS3;HNRNPU;RPS21
superficial stratum of r7Ve	4/300	0.173931	0.582026	0	0	1.87454	3.27876	H2AFY;RPL11;RPS3;RPS21
superficial stratum of r8Tr	4/300	0.173931	0.582026	0	0	1.87454	3.27876	GRN;RPS3;YBX1;RPS21
superficial stratum of r9BM	4/300	0.173931	0.582026	0	0	1.87454	3.27876	APLP2;PSAP;CALR;SQSTM1
tectal gray formation	4/300	0.173931	0.582026	0	0	1.87454	3.27876	RPS19;ACTN4;LCP1;RPS12
telencephalic vesicle	4/300	0.173931	0.582026	0	0	1.87454	3.27876	CD81;PRDX1;HMGA1;RPS24
terminal paraventricular area of THyA	4/300	0.173931	0.582026	0	0	1.87454	3.27876	ENO1;PFN1;SERF2;ATP5L
thalamic (p2) zona limitans domain	4/300	0.173931	0.582026	0	0	1.87454	3.27876	CDKN1A;ARPC2;PABPC4;S100A6
ventral striatum	4/300	0.173931	0.582026	0	0	1.87454	3.27876	CD63;SLC20A1;FTH1;S100A4
ventral tuberomammillary nucleus, superficial part (histaminergic)	4/300	0.173931	0.582026	0	0	1.87454	3.27876	CAP1;APLP2;ATP5G3;EEF2
ventrolateral part of VMH	4/300	0.173931	0.582026	0	0	1.87454	3.27876	ARPC2;APLP2;EEF2;ATP5L
ventrolateral periolivary nucleus	4/300	0.173931	0.582026	0	0	1.87454	3.27876	BTG1;RPL31;APLP2;SMAP2
Field CA1, stratum lacunosum-moleculare	5/412	0.180144	0.601702	0	0	1.70656	2.92504	CDKN1A;TUBA1B;SLC20A1;SPP1;ND3
Supraoptic nucleus	5/479	0.267817	0.80209	0	0	1.46029	1.92386	HSP90AA1;HSP90AB1;RPS6;CALR;PFN1
Ventral tegmental nucleus	4/375	0.289202	0.80209	0	0	1.48986	1.84836	S100A4;TAGLN2;RPL27;RPL37
Field CA1, stratum radiatum	4/397	0.325114	0.80209	0	0	1.40487	1.57848	GDF15;SPP1;TIMP1;ND3
Suprageniculate nucleus	5/520	0.325542	0.80209	0	0	1.34119	1.50517	RPL30;CDKN1A;NRG4;ND3;ZMPSTE24
Anteromedial nucleus	4/422	0.36626	0.80209	0	0	1.31915	1.32497	RPS19;PABPC4;TAGLN2;RPS12
Agranular insular area	3/300	0.371083	0.80209	0	0	1.39124	1.37917	PRDX1;RGS16;HMGA1
Agranular insular area, posterior part	3/300	0.371083	0.80209	0	0	1.39124	1.37917	HMGA1;TAGLN2;HSPG2
Agranular insular area, posterior part, layer 6a	3/300	0.371083	0.80209	0	0	1.39124	1.37917	HMGA1;TAGLN2;HSPG2
Agranular insular area, ventral part, layer 5	3/300	0.371083	0.80209	0	0	1.39124	1.37917	MMP14;HMGA1;HSPG2
Ammon's horn	3/300	0.371083	0.80209	0	0	1.39124	1.37917	GDF15;SPP1;ND3
Anterior cingulate area, dorsal part	3/300	0.371083	0.80209	0	0	1.39124	1.37917	RPL35A;DBI;RPS24
Anterior cingulate area, dorsal part, layer 5	3/300	0.371083	0.80209	0	0	1.39124	1.37917	SDC2;PABPC4;DBI
Anterior cingulate area, dorsal part, layer 6a	3/300	0.371083	0.80209	0	0	1.39124	1.37917	FCER1G;PABPC4;DBI
Anterior cingulate area, ventral part	3/300	0.371083	0.80209	0	0	1.39124	1.37917	RPL35A;DBI;RPL37
Anterior cingulate area, ventral part, layer 1	3/300	0.371083	0.80209	0	0	1.39124	1.37917	RPL35A;DBI;RPL37
Anterior hypothalamic nucleus, anterior part	3/300	0.371083	0.80209	0	0	1.39124	1.37917	ENO1;SERF2;ATP5L
Anterior olfactory nucleus, lateral part	3/300	0.371083	0.80209	0	0	1.39124	1.37917	CD81;RPL37A;RPS24
Anteromedial visual area, layer 6a	3/300	0.371083	0.80209	0	0	1.39124	1.37917	PABPC4;HMGA1;MMP9
Central lateral nucleus of the thalamus	3/300	0.371083	0.80209	0	0	1.39124	1.37917	RPS19;ARPC2;RPS12
Dentate gyrus, molecular layer	3/300	0.371083	0.80209	0	0	1.39124	1.37917	SLC20A1;SPP1;ND3
Dentate nucleus	3/300	0.371083	0.80209	0	0	1.39124	1.37917	RPS14;RPS11;RPS21
Dorsal part of the lateral geniculate complex	3/300	0.371083	0.80209	0	0	1.39124	1.37917	CDKN1A;SDC2;ZMPSTE24
Entorhinal area, lateral part, layer 2b	3/300	0.371083	0.80209	0	0	1.39124	1.37917	RPS14;RAB31;PFDN5
Entorhinal area, lateral part, layer 6a	3/300	0.371083	0.80209	0	0	1.39124	1.37917	RAB31;NRG4;TIMP1
Entorhinal area, medial part, dorsal zone, layer 2	3/300	0.371083	0.80209	0	0	1.39124	1.37917	RAB31;FAU;PFDN5
Entorhinal area, medial part, ventral zone, layer 1	3/300	0.371083	0.80209	0	0	1.39124	1.37917	RPS14;CHCHD2;CALR
Field CA2, pyramidal layer	3/300	0.371083	0.80209	0	0	1.39124	1.37917	SLC20A1;SPP1;ZMPSTE24
Field CA3, pyramidal layer	3/300	0.371083	0.80209	0	0	1.39124	1.37917	CDKN1A;SPP1;IER3
Field CA3, stratum lucidum	3/300	0.371083	0.80209	0	0	1.39124	1.37917	SDC2;SPP1;IER3
Geniculate group, dorsal thalamus	3/300	0.371083	0.80209	0	0	1.39124	1.37917	CDKN1A;NRG4;ZMPSTE24
Hypothalamus	3/300	0.371083	0.80209	0	0	1.39124	1.37917	RLF;SERF2;RHOA
Inferior colliculus, dorsal nucleus	3/300	0.371083	0.80209	0	0	1.39124	1.37917	ACTN4;PHLDA1;ACTG1
Intercalated amygdalar nucleus	3/300	0.371083	0.80209	0	0	1.39124	1.37917	ARPC2;PRDX1;S100A4
Intergeniculate leaflet of the lateral geniculate complex	3/300	0.371083	0.80209	0	0	1.39124	1.37917	CDKN1A;PABPC4;ZMPSTE24
Islands of Calleja	3/300	0.371083	0.80209	0	0	1.39124	1.37917	CD81;RPS8;RPS6
Koelliker-Fuse nucleus	3/300	0.371083	0.80209	0	0	1.39124	1.37917	RPL30;RPL27A;TAGLN2
Lateral dorsal nucleus of thalamus	3/300	0.371083	0.80209	0	0	1.39124	1.37917	CDKN1A;SDC2;PABPC4
Lateral posterior nucleus of the thalamus	3/300	0.371083	0.80209	0	0	1.39124	1.37917	CDKN1A;SDC2;SPP1
Lingula (I), granular layer	3/300	0.371083	0.80209	0	0	1.39124	1.37917	TUBA1B;YWHAB;RPL35A
Lobule II, granular layer	3/300	0.371083	0.80209	0	0	1.39124	1.37917	TUBA1B;RPL35A;EIF4G2
Lobule III	3/300	0.371083	0.80209	0	0	1.39124	1.37917	TUBA1B;RPL23;RPL35A
Lobule III, molecular layer	3/300	0.371083	0.80209	0	0	1.39124	1.37917	TUBA1B;RPL23;RPL35A
Magnocellular reticular nucleus	3/300	0.371083	0.80209	0	0	1.39124	1.37917	ARPC2;PSAP;HNRNPU
Medial amygdalar nucleus, anteroventral part	3/300	0.371083	0.80209	0	0	1.39124	1.37917	RAB31;RPL15;RHOA
Medial amygdalar nucleus, posterodorsal part, sublayer b	3/300	0.371083	0.80209	0	0	1.39124	1.37917	FTH1;SERF2;ZMPSTE24
Mediodorsal nucleus of the thalamus, lateral part	3/300	0.371083	0.80209	0	0	1.39124	1.37917	RPS19;PABPC4;RPS12
Mediodorsal nucleus of the thalamus, medial part	3/300	0.371083	0.80209	0	0	1.39124	1.37917	PABPC4;RPL35A;RPS12
Medulla, motor related	3/300	0.371083	0.80209	0	0	1.39124	1.37917	H2AFY;RPS3;HNRNPU
Medullary reticular nucleus	3/300	0.371083	0.80209	0	0	1.39124	1.37917	H2AFY;RPS3;RPS21
Medullary reticular nucleus, dorsal part	3/300	0.371083	0.80209	0	0	1.39124	1.37917	CD63;H2AFY;RPS21
Midbrain reticular nucleus, retrorubral area	3/300	0.371083	0.80209	0	0	1.39124	1.37917	FCER1G;ARPC2;PLAUR
Midbrain, behavioral state related	3/300	0.371083	0.80209	0	0	1.39124	1.37917	ARPC2;PPT1;MTDH
Midbrain, motor related	3/300	0.371083	0.80209	0	0	1.39124	1.37917	ACTN4;YBX1;LCP1
Nodulus (X)	3/300	0.371083	0.80209	0	0	1.39124	1.37917	TUBA1B;RPL11;ACTG1
Nucleus ambiguus, ventral division	3/300	0.371083	0.80209	0	0	1.39124	1.37917	RPL31;APLP2;SMAP2
Nucleus of the brachium of the inferior colliculus	3/300	0.371083	0.80209	0	0	1.39124	1.37917	RPL30;NRG4;SLC20A1
Nucleus of the lateral lemniscus	3/300	0.371083	0.80209	0	0	1.39124	1.37917	RPL30;PLAUR;RPS27A
Nucleus of the lateral lemniscus, dorsal part	3/300	0.371083	0.80209	0	0	1.39124	1.37917	RPL30;PLAUR;RPS12
Nucleus of the lateral olfactory tract, molecular layer	3/300	0.371083	0.80209	0	0	1.39124	1.37917	RPL15;PFDN5;ACTG1
Orbital area	3/300	0.371083	0.80209	0	0	1.39124	1.37917	CD81;RGS16;RPS24
Pallidum, ventral region	3/300	0.371083	0.80209	0	0	1.39124	1.37917	CD63;FTH1;S100A4
Periventricular zone	3/300	0.371083	0.80209	0	0	1.39124	1.37917	HSP90AA1;SLC20A1;ATP5L
Piriform area, pyramidal layer	3/300	0.371083	0.80209	0	0	1.39124	1.37917	CD63;ARPC2;PRDX1
Pontine reticular nucleus, caudal part	3/300	0.371083	0.80209	0	0	1.39124	1.37917	ARPC2;ITGB2;RPL27
Posterior parietal association areas, layer 6a	3/300	0.371083	0.80209	0	0	1.39124	1.37917	NRG4;HMGA1;MMP9
Posterior parietal association areas, layer 6b	3/300	0.371083	0.80209	0	0	1.39124	1.37917	NRG4;HMGA1;MMP9
Posterolateral visual area, layer 1	3/300	0.371083	0.80209	0	0	1.39124	1.37917	NRG4;IL1B;CTSD
Postsubiculum, layer 2	3/300	0.371083	0.80209	0	0	1.39124	1.37917	ARPC2;HMGA1;ZMPSTE24
Prelimbic area	3/300	0.371083	0.80209	0	0	1.39124	1.37917	MSN;DBI;RPS24
Prelimbic area, layer 1	3/300	0.371083	0.80209	0	0	1.39124	1.37917	MSN;DBI;RPS24
Presubiculum, layer 1	3/300	0.371083	0.80209	0	0	1.39124	1.37917	HMGA1;ND3;ZMPSTE24
Presubiculum, layer 2	3/300	0.371083	0.80209	0	0	1.39124	1.37917	HMGA1;ND3;ZMPSTE24
Primary somatosensory area, barrel field, layer 6b	3/300	0.371083	0.80209	0	0	1.39124	1.37917	NRG4;TIMP1;ZMPSTE24
Primary somatosensory area, lower limb, layer 6a	3/300	0.371083	0.80209	0	0	1.39124	1.37917	ARPC2;MMP9;RPS12
Primary somatosensory area, lower limb, layer 6b	3/300	0.371083	0.80209	0	0	1.39124	1.37917	TAGLN2;MMP9;RPS12
Primary somatosensory area, nose, layer 5	3/300	0.371083	0.80209	0	0	1.39124	1.37917	HMGA1;HSPG2;RPS24
Primary somatosensory area, upper limb, layer 6b	3/300	0.371083	0.80209	0	0	1.39124	1.37917	ARPC2;NRG4;MMP9
Primary visual area, layer 6b	3/300	0.371083	0.80209	0	0	1.39124	1.37917	HMGA1;MMP9;ZMPSTE24
Principal sensory nucleus of the trigeminal	3/300	0.371083	0.80209	0	0	1.39124	1.37917	RPL30;ARPC2;ACTN1
Retrosplenial area, dorsal part, layer 5	3/300	0.371083	0.80209	0	0	1.39124	1.37917	SDC2;DBI;LCP1
Retrosplenial area, lateral agranular part, layer 6b	3/300	0.371083	0.80209	0	0	1.39124	1.37917	PABPC4;HMGA1;MMP9
Secondary motor area, layer 6a	3/300	0.371083	0.80209	0	0	1.39124	1.37917	SDC2;DBI;MMP9
Spinal nucleus of the trigeminal, interpolar part	3/300	0.371083	0.80209	0	0	1.39124	1.37917	RPL30;ARPC2;RPS3
Striatum-like amygdalar nuclei	3/300	0.371083	0.80209	0	0	1.39124	1.37917	SLC20A1;S100A4;RHOA
Subiculum, dorsal part, molecular layer	3/300	0.371083	0.80209	0	0	1.39124	1.37917	SPP1;TIMP1;ND3
Subparafascicular nucleus	3/300	0.371083	0.80209	0	0	1.39124	1.37917	BTG1;YBX1;B2M
Subparafascicular nucleus, parvicellular part	3/300	0.371083	0.80209	0	0	1.39124	1.37917	BTG1;S100A6;YBX1
Substantia innominata	3/300	0.371083	0.80209	0	0	1.39124	1.37917	CD63;FTH1;S100A4
Superior colliculus, motor related, deep gray layer	3/300	0.371083	0.80209	0	0	1.39124	1.37917	ARPC2;ACTN4;YBX1
Superior colliculus, motor related, intermediate white layer	3/300	0.371083	0.80209	0	0	1.39124	1.37917	SDC2;ACTN4;YBX1
Superior olivary complex	3/300	0.371083	0.80209	0	0	1.39124	1.37917	APLP2;SDC2;PPT1
Superior olivary complex, periolivary region	3/300	0.371083	0.80209	0	0	1.39124	1.37917	APLP2;SDC2;PPT1
Supplemental somatosensory area	3/300	0.371083	0.80209	0	0	1.39124	1.37917	ARPC2;NRG4;HMGA1
Supramammillary nucleus, lateral part	3/300	0.371083	0.80209	0	0	1.39124	1.37917	MSN;MTDH;MCL1
Temporal association areas, layer 6b	3/300	0.371083	0.80209	0	0	1.39124	1.37917	PABPC4;IL1B;RPL27
Thalamus, polymodal association cortex related	3/300	0.371083	0.80209	0	0	1.39124	1.37917	CDKN1A;PABPC4;MMP9
Tuberomammillary nucleus, ventral part	3/300	0.371083	0.80209	0	0	1.39124	1.37917	CAP1;APLP2;EEF2
Ventral group of the dorsal thalamus	3/300	0.371083	0.80209	0	0	1.39124	1.37917	PABPC4;TAGLN2;RPS12
Ventral posterolateral nucleus of the thalamus	3/300	0.371083	0.80209	0	0	1.39124	1.37917	RPL30;MMP9;RPS12
Visual areas	3/300	0.371083	0.80209	0	0	1.39124	1.37917	HMGA1;DBI;TIMP1
alar part of peduncular hypothalamus	3/300	0.371083	0.80209	0	0	1.39124	1.37917	CDKN1A;SERF2;RHOA
alar part of terminal hypothalamus	3/300	0.371083	0.80209	0	0	1.39124	1.37917	ENO1;PFN1;RHOA
anterior cortical amygdaloid area	3/300	0.371083	0.80209	0	0	1.39124	1.37917	SLC20A1;HSPG2;SQSTM1
anterior pretectal nucleus, ventral core part	3/300	0.371083	0.80209	0	0	1.39124	1.37917	PABPC4;S100A6;ACTN4
central amygdaloid nucleus, medial part	3/300	0.371083	0.80209	0	0	1.39124	1.37917	TMED9;FTH1;FAU
central part of MD	3/300	0.371083	0.80209	0	0	1.39124	1.37917	RPS19;RPL35A;RPS12
central subpallium (classic basal ganglia)	3/300	0.371083	0.80209	0	0	1.39124	1.37917	CDKN1A;ARPC2;SLC20A1
deep gray layer of SC	3/300	0.371083	0.80209	0	0	1.39124	1.37917	SDC2;ACTN4;YBX1
deep white layer of SC	3/300	0.371083	0.80209	0	0	1.39124	1.37917	SDC2;ACTN4;YBX1
diencephalon	3/300	0.371083	0.80209	0	0	1.39124	1.37917	CDKN1A;ARPC2;ACTN4
dorsal paracommissural tectal nucleus, m1 part	3/300	0.371083	0.80209	0	0	1.39124	1.37917	ARPC2;PABPC4;ACTN4
dorsolateral (non-cerebellar) part of isA	3/300	0.371083	0.80209	0	0	1.39124	1.37917	TYROBP;ACTN4;YBX1
dorsolateral part of m2A	3/300	0.371083	0.80209	0	0	1.39124	1.37917	SH3BGRL3;ACTN4;YBX1
entorhinal cortex	3/300	0.371083	0.80209	0	0	1.39124	1.37917	RAB31;IL1B;PFDN5
ethmoid nucleus	3/300	0.371083	0.80209	0	0	1.39124	1.37917	RPS19;RPL37A;RPS12
hypothalamic amygdala	3/300	0.371083	0.80209	0	0	1.39124	1.37917	SLC20A1;FTH1;RHOA
insular cortex	3/300	0.371083	0.80209	0	0	1.39124	1.37917	PRDX1;RGS16;HMGA1
intergeniculate leaflet	3/300	0.371083	0.80209	0	0	1.39124	1.37917	CDKN1A;LAPTM5;ZMPSTE24
intermediate gray layer of SC	3/300	0.371083	0.80209	0	0	1.39124	1.37917	RPS19;ACTN4;LCP1
intermediate part of r9B	3/300	0.371083	0.80209	0	0	1.39124	1.37917	H2AFY;LAPTM5;B2M
intermediate stratum of APal	3/300	0.371083	0.80209	0	0	1.39124	1.37917	TMED9;FTH1;FAU
intermediate stratum of LPrP	3/300	0.371083	0.80209	0	0	1.39124	1.37917	ARPC2;NRG4;HMGA1
intermediate stratum of Mam	3/300	0.371083	0.80209	0	0	1.39124	1.37917	HLA-A;ATP5G3;MTDH
intermediate stratum of PcPV	3/300	0.371083	0.80209	0	0	1.39124	1.37917	PABPC4;S100A6;ACTN4
intermediate stratum of TPaA	3/300	0.371083	0.80209	0	0	1.39124	1.37917	ENO1;SERF2;ATP5L
intermediate stratum of TSPaA	3/300	0.371083	0.80209	0	0	1.39124	1.37917	ENO1;RHOA;ATP5L
intermediate stratum of isBL	3/300	0.371083	0.80209	0	0	1.39124	1.37917	TYROBP;TAGLN2;TIMP1
intermediate stratum of isLim	3/300	0.371083	0.80209	0	0	1.39124	1.37917	RPL30;PLAUR;YBX1
intermediate stratum of m1AD	3/300	0.371083	0.80209	0	0	1.39124	1.37917	PABPC4;YBX1;HSPG2
intermediate stratum of m1AL	3/300	0.371083	0.80209	0	0	1.39124	1.37917	RPL30;SH3BGRL3;ZMPSTE24
intermediate stratum of m1Lim	3/300	0.371083	0.80209	0	0	1.39124	1.37917	RPL30;BTG1;ARPC2
intermediate stratum of m2ADL	3/300	0.371083	0.80209	0	0	1.39124	1.37917	ARPC2;ACTN4;YBX1
intermediate stratum of p3B	3/300	0.371083	0.80209	0	0	1.39124	1.37917	MSN;TAGLN2;ACTN4
intermediate stratum of r1Lim	3/300	0.371083	0.80209	0	0	1.39124	1.37917	PLAUR;TAGLN2;RPL27
intermediate stratum of r2BL	3/300	0.371083	0.80209	0	0	1.39124	1.37917	RPL27;TIMP1;DUSP6
intermediate stratum of r7Lim	3/300	0.371083	0.80209	0	0	1.39124	1.37917	MMP14;H2AFY;RPL11
intermediate stratum of r8BI	3/300	0.371083	0.80209	0	0	1.39124	1.37917	H2AFY;RPL37;B2M
intermediate stratum of r8Lim	3/300	0.371083	0.80209	0	0	1.39124	1.37917	MMP14;H2AFY;RPL11
intermediate stratum of r9BI	3/300	0.371083	0.80209	0	0	1.39124	1.37917	H2AFY;LAPTM5;B2M
intermediate stratum of r9BM	3/300	0.371083	0.80209	0	0	1.39124	1.37917	H2AFY;HNRNPU;B2M
intermediate stratum of r9Lim	3/300	0.371083	0.80209	0	0	1.39124	1.37917	TYROBP;H2AFY;RPL11
intermediate stratum of r9Tr	3/300	0.371083	0.80209	0	0	1.39124	1.37917	H2AFY;RPL11;RPS21
intermediate stratum of the VAP	3/300	0.371083	0.80209	0	0	1.39124	1.37917	PRDX1;S100A4;HSPG2
intermedioposterior nucleus	3/300	0.371083	0.80209	0	0	1.39124	1.37917	ARPC2;SPP1;ND3
isthmic part of basolateral isthmic reticular formation	3/300	0.371083	0.80209	0	0	1.39124	1.37917	TYROBP;TAGLN2;TIMP1
isthmic part of the intermediate lateral lemniscal nucleus	3/300	0.371083	0.80209	0	0	1.39124	1.37917	RPL30;PLAUR;YBX1
isthmic part of the periaqueductal gray	3/300	0.371083	0.80209	0	0	1.39124	1.37917	ARPC2;TAGLN2;YBX1
isthmus proper	3/300	0.371083	0.80209	0	0	1.39124	1.37917	TYROBP;PLAUR;YBX1
lateral part of Med	3/300	0.371083	0.80209	0	0	1.39124	1.37917	RPL5;RPS19;RPS21
lateral part of m2A	3/300	0.371083	0.80209	0	0	1.39124	1.37917	TYROBP;ACTN4;YBX1
layer 1 of PrS	3/300	0.371083	0.80209	0	0	1.39124	1.37917	HMGA1;ND3;ZMPSTE24
layer 2 of InsCx	3/300	0.371083	0.80209	0	0	1.39124	1.37917	PRDX1;HMGA1;RPS11
layer 2 of PrS	3/300	0.371083	0.80209	0	0	1.39124	1.37917	HMGA1;ND3;ZMPSTE24
layer 3 of CCx	3/300	0.371083	0.80209	0	0	1.39124	1.37917	PABPC4;RPS12;ZMPSTE24
layer 3 of InsCx	3/300	0.371083	0.80209	0	0	1.39124	1.37917	PRDX1;RGS16;HMGA1
layer 3 of LOT	3/300	0.371083	0.80209	0	0	1.39124	1.37917	RPL30;SLC20A1;S100A4
layer 3 of OCx	3/300	0.371083	0.80209	0	0	1.39124	1.37917	CD81;HMGA1;DBI
layer 4 of InsCx	3/300	0.371083	0.80209	0	0	1.39124	1.37917	ARPC2;RGS16;HMGA1
layer 6 of CCx	3/300	0.371083	0.80209	0	0	1.39124	1.37917	SDC2;MSN;DBI
layer 6 of FCx	3/300	0.371083	0.80209	0	0	1.39124	1.37917	BTG1;NRG4;MMP9
layer 6 of PCx	3/300	0.371083	0.80209	0	0	1.39124	1.37917	FCER1G;NRG4;MMP9
layer 6 of PaS	3/300	0.371083	0.80209	0	0	1.39124	1.37917	SDC2;SPP1;ZMPSTE24
layer 6 of PrS	3/300	0.371083	0.80209	0	0	1.39124	1.37917	RPL30;RPS12;ZMPSTE24
layer 6a of PrS	3/300	0.371083	0.80209	0	0	1.39124	1.37917	RPL30;RPS12;ZMPSTE24
liminal part of alar isthmus	3/300	0.371083	0.80209	0	0	1.39124	1.37917	NRG4;PLAUR;ACTN4
liminal part of alar p1	3/300	0.371083	0.80209	0	0	1.39124	1.37917	ARPC2;S100A6;ACTN4
liminal part of alar p2	3/300	0.371083	0.80209	0	0	1.39124	1.37917	BTG1;S100A6;ACTN4
liminal part of the r8 alar plate	3/300	0.371083	0.80209	0	0	1.39124	1.37917	MMP14;H2AFY;RPL11
mantle zone of AHy	3/300	0.371083	0.80209	0	0	1.39124	1.37917	SLC20A1;FTH1;RHOA
mantle zone of AStr	3/300	0.371083	0.80209	0	0	1.39124	1.37917	ARPC2;GDF15;S100A4
mantle zone of ERCx	3/300	0.371083	0.80209	0	0	1.39124	1.37917	RAB31;IL1B;PFDN5
mantle zone of InsCx	3/300	0.371083	0.80209	0	0	1.39124	1.37917	PRDX1;RGS16;HMGA1
mantle zone of Ist	3/300	0.371083	0.80209	0	0	1.39124	1.37917	TYROBP;PLAUR;YBX1
mantle zone of LAP	3/300	0.371083	0.80209	0	0	1.39124	1.37917	RAB31;ARPC2;PRDX1
mantle zone of PO2	3/300	0.371083	0.80209	0	0	1.39124	1.37917	ENO1;SERF2;ATP5L
mantle zone of THyB-V	3/300	0.371083	0.80209	0	0	1.39124	1.37917	HSP90AA1;SH3BGRL3;ATP5G3
mantle zone of TSPaA	3/300	0.371083	0.80209	0	0	1.39124	1.37917	ENO1;RHOA;ATP5L
mantle zone of isLim	3/300	0.371083	0.80209	0	0	1.39124	1.37917	NRG4;PLAUR;ACTN4
mantle zone of m1Lim	3/300	0.371083	0.80209	0	0	1.39124	1.37917	ARPC2;NRG4;YBX1
mantle zone of m2AL	3/300	0.371083	0.80209	0	0	1.39124	1.37917	TYROBP;ACTN4;YBX1
mantle zone of p2Lim	3/300	0.371083	0.80209	0	0	1.39124	1.37917	BTG1;S100A6;ACTN4
mantle zone of p2ZL	3/300	0.371083	0.80209	0	0	1.39124	1.37917	CDKN1A;PABPC4;S100A6
mantle zone of p3ZL	3/300	0.371083	0.80209	0	0	1.39124	1.37917	CDKN1A;S100A6;MMP9
mantle zone of r1Lim	3/300	0.371083	0.80209	0	0	1.39124	1.37917	ARPC2;TAGLN2;RPL27
mantle zone of r3Ve	3/300	0.371083	0.80209	0	0	1.39124	1.37917	H2AFY;HNRNPU;RPS21
mantle zone of r8Lim	3/300	0.371083	0.80209	0	0	1.39124	1.37917	MMP14;H2AFY;RPL11
mantle zone of r9BI	3/300	0.371083	0.80209	0	0	1.39124	1.37917	H2AFY;LAPTM5;B2M
medial part of r9B	3/300	0.371083	0.80209	0	0	1.39124	1.37917	H2AFY;RPS3;CALR
mesomere 2 (preisthmus or caudal midbrain)	3/300	0.371083	0.80209	0	0	1.39124	1.37917	ACTN4;YBX1;DUSP6
molecular layer of the DG	3/300	0.371083	0.80209	0	0	1.39124	1.37917	SLC20A1;SPP1;ND3
neuropeptide-S nucleus	3/300	0.371083	0.80209	0	0	1.39124	1.37917	NRG4;LAPTM5;TAGLN2
nucleus of Barrington	3/300	0.371083	0.80209	0	0	1.39124	1.37917	NRG4;TAGLN2;HLA-A
optic fiber layer of SC	3/300	0.371083	0.80209	0	0	1.39124	1.37917	RPS19;LCP1;RPS12
p1 part of the pararubral nucleus	3/300	0.371083	0.80209	0	0	1.39124	1.37917	S100A6;MSN;TAGLN2
p3 part of the ZL core	3/300	0.371083	0.80209	0	0	1.39124	1.37917	CDKN1A;MSN;TAGLN2
pallidal part of olfactory tuberculum	3/300	0.371083	0.80209	0	0	1.39124	1.37917	CD63;CD81;PRDX1
paralemniscal isthmic area	3/300	0.371083	0.80209	0	0	1.39124	1.37917	RPL30;PLAUR;YBX1
parvicellular part of Lat	3/300	0.371083	0.80209	0	0	1.39124	1.37917	RPL30;RPS3;RPS21
peduncular (caudal) hypothalamus	3/300	0.371083	0.80209	0	0	1.39124	1.37917	ARPC2;SERF2;RHOA
perilemniscal isthmic area	3/300	0.371083	0.80209	0	0	1.39124	1.37917	RPL30;PLAUR;RPS12
periventricular stratum of Dg	3/300	0.371083	0.80209	0	0	1.39124	1.37917	ARPC2;SLC20A1;HMGA1
periventricular stratum of Ist	3/300	0.371083	0.80209	0	0	1.39124	1.37917	ARPC2;TAGLN2;YBX1
periventricular stratum of JcPL	3/300	0.371083	0.80209	0	0	1.39124	1.37917	ARPC2;CCL20;HNRNPU
periventricular stratum of PO2	3/300	0.371083	0.80209	0	0	1.39124	1.37917	ENO1;SERF2;ATP5L
periventricular stratum of SC	3/300	0.371083	0.80209	0	0	1.39124	1.37917	ARPC2;ACTN4;YBX1
periventricular stratum of r4Co	3/300	0.371083	0.80209	0	0	1.39124	1.37917	RPS8;RPL37A;RPS11
periventricular stratum of r9BM	3/300	0.371083	0.80209	0	0	1.39124	1.37917	CD63;RPL27;HLA-A
polymorph layer of TuStr	3/300	0.371083	0.80209	0	0	1.39124	1.37917	CD63;CD81;PRDX1
posterior intralaminar nucleus	3/300	0.371083	0.80209	0	0	1.39124	1.37917	FCER1G;PABPC4;S100A6
posteromedial visual area, layer 1	3/300	0.371083	0.80209	0	0	1.39124	1.37917	RPS18;RPS6;RPS12
posteromedial visual area, layer 4	3/300	0.371083	0.80209	0	0	1.39124	1.37917	RPL30;DBI;RPS12
posteromedial visual area, layer 6b	3/300	0.371083	0.80209	0	0	1.39124	1.37917	HMGA1;LAPTM5;ZMPSTE24
preisthmic midbrain tectum	3/300	0.371083	0.80209	0	0	1.39124	1.37917	TYROBP;ACTN4;YBX1
prethalamic (p3) zona limitans domain	3/300	0.371083	0.80209	0	0	1.39124	1.37917	CDKN1A;S100A6;MMP9
prosomere 1	3/300	0.371083	0.80209	0	0	1.39124	1.37917	ARPC2;ACTN4;LCP1
r1 basal plate	3/300	0.371083	0.80209	0	0	1.39124	1.37917	ARPC2;PPT1;DUSP6
r1 part of ventral parvicellular reticular formation	3/300	0.371083	0.80209	0	0	1.39124	1.37917	PLAUR;TAGLN2;RPL27
r10 part of the inferior olive	3/300	0.371083	0.80209	0	0	1.39124	1.37917	APLP2;PSAP;CALR
r2 part of basolateral reticular formation	3/300	0.371083	0.80209	0	0	1.39124	1.37917	RPL27;TIMP1;DUSP6
r2 part of nucleus subcoeruleus	3/300	0.371083	0.80209	0	0	1.39124	1.37917	MMP14;TAGLN2;RPL27
r3 part of lateral pontine nuclei	3/300	0.371083	0.80209	0	0	1.39124	1.37917	RPS8;CSDE1;EEF2
r3 part of lateral vestibular nucleus	3/300	0.371083	0.80209	0	0	1.39124	1.37917	ARPC2;HNRNPU;RPS21
r3 part of vestibular sensory column	3/300	0.371083	0.80209	0	0	1.39124	1.37917	H2AFY;HNRNPU;RPS21
r4 alar plate	3/300	0.371083	0.80209	0	0	1.39124	1.37917	ARPC2;RPL27A;HNRNPU
r4 basal plate	3/300	0.371083	0.80209	0	0	1.39124	1.37917	MMP14;ITGB2;MSN
r4 part of dorsal cochlear nucleus	3/300	0.371083	0.80209	0	0	1.39124	1.37917	RPS8;RPL37A;RPS11
r5 alar plate	3/300	0.371083	0.80209	0	0	1.39124	1.37917	H2AFY;RPS3;HNRNPU
r5 basal plate	3/300	0.371083	0.80209	0	0	1.39124	1.37917	HNRNPU;OAZ1;GAPDH
r6 part of paragigantocellular nucleus	3/300	0.371083	0.80209	0	0	1.39124	1.37917	MYL6;RPS18;PSAP
r6 part of the trigeminal column	3/300	0.371083	0.80209	0	0	1.39124	1.37917	MMP14;FCER1G;H2AFY
r7 basal plate	3/300	0.371083	0.80209	0	0	1.39124	1.37917	PSAP;HNRNPU;GAPDH
r7 part of dorsal parvicellular reticular formation	3/300	0.371083	0.80209	0	0	1.39124	1.37917	H2AFY;RPL11;RPL27
r7 part of parapyramidal nucleus	3/300	0.371083	0.80209	0	0	1.39124	1.37917	MYL6;PSAP;HNRNPU
r7 part of rostral ventromedial reticular area	3/300	0.371083	0.80209	0	0	1.39124	1.37917	MYL6;PSAP;SQSTM1
r7 part of the posteroventral cochlear nucleus	3/300	0.371083	0.80209	0	0	1.39124	1.37917	HSP90AA1;RPL31;SMAP2
r7 part of ventral parvicellular reticular formation	3/300	0.371083	0.80209	0	0	1.39124	1.37917	MMP14;H2AFY;RPL11
r8 part of basointermediate reticular formation	3/300	0.371083	0.80209	0	0	1.39124	1.37917	H2AFY;RPL37;B2M
r8 part of basomedial reticular formation	3/300	0.371083	0.80209	0	0	1.39124	1.37917	HNRNPU;CALR;B2M
r8 part of inferior olive	3/300	0.371083	0.80209	0	0	1.39124	1.37917	PSAP;CALR;SMAP2
r8 part of the paragigantocellular nucleus	3/300	0.371083	0.80209	0	0	1.39124	1.37917	PSAP;CALR;MCL1
r8 part of ventral parvicellular reticular formation	3/300	0.371083	0.80209	0	0	1.39124	1.37917	MMP14;H2AFY;RPL11
r9 part of basointermediate reticular formation	3/300	0.371083	0.80209	0	0	1.39124	1.37917	H2AFY;LAPTM5;B2M
r9 part of basomedial reticular formation	3/300	0.371083	0.80209	0	0	1.39124	1.37917	H2AFY;HNRNPU;B2M
r9 part of nucleus of Roller	3/300	0.371083	0.80209	0	0	1.39124	1.37917	CD63;RPL27;HLA-A
r9 part of paragigantocellular nucleus	3/300	0.371083	0.80209	0	0	1.39124	1.37917	PSAP;CALR;MCL1
r9 part of the inferior olive	3/300	0.371083	0.80209	0	0	1.39124	1.37917	PSAP;CALR;SQSTM1
r9 part of ventral parvicellular reticular formation	3/300	0.371083	0.80209	0	0	1.39124	1.37917	TYROBP;H2AFY;RPL11
reticular formation of basal m2	3/300	0.371083	0.80209	0	0	1.39124	1.37917	S100A6;PLAUR;ACTN4
retroreuniens nucleus	3/300	0.371083	0.80209	0	0	1.39124	1.37917	RPS18;HLA-A;MCL1
roof plate of p2 (epithalamic roofplate)	3/300	0.371083	0.80209	0	0	1.39124	1.37917	SLC20A1;HNRNPU;SH3BGRL3
second (ventral) preoptic domain	3/300	0.371083	0.80209	0	0	1.39124	1.37917	ENO1;SERF2;ATP5L
sublayer 6a of CCx	3/300	0.371083	0.80209	0	0	1.39124	1.37917	SDC2;MSN;DBI
sublayer 6a of FCx	3/300	0.371083	0.80209	0	0	1.39124	1.37917	BTG1;SDC2;MMP9
sublayer 6b of FCx	3/300	0.371083	0.80209	0	0	1.39124	1.37917	ARPC2;NRG4;MMP9
sublayer 6b of InsCx	3/300	0.371083	0.80209	0	0	1.39124	1.37917	ARPC2;MMP9;RPS12
submedius thalamic nucleus	3/300	0.371083	0.80209	0	0	1.39124	1.37917	CFL1;DBI;MCL1
subpallium	3/300	0.371083	0.80209	0	0	1.39124	1.37917	CDKN1A;SLC20A1;FAU
substantia innominata/basal nucleus	3/300	0.371083	0.80209	0	0	1.39124	1.37917	ARPC2;FTH1;S100A4
substantia nigra reticulata, m1 part	3/300	0.371083	0.80209	0	0	1.39124	1.37917	CHCHD2;GAPDH;TPT1
superficial gray layer of SC	3/300	0.371083	0.80209	0	0	1.39124	1.37917	RPS19;ND3;RPS12
superficial stratum of AHy	3/300	0.371083	0.80209	0	0	1.39124	1.37917	SLC20A1;FTH1;RHOA
superficial stratum of ERCx (cortical plate/marginal zone)	3/300	0.371083	0.80209	0	0	1.39124	1.37917	RAB31;IL1B;PFDN5
superficial stratum of InsCx (cortical plate/marginal zone)	3/300	0.371083	0.80209	0	0	1.39124	1.37917	PRDX1;RGS16;HMGA1
superficial stratum of LAP	3/300	0.371083	0.80209	0	0	1.39124	1.37917	RAB31;IL1B;HSPG2
superficial stratum of LPrP	3/300	0.371083	0.80209	0	0	1.39124	1.37917	CD63;PRDX1;EEF2
superficial stratum of Pal	3/300	0.371083	0.80209	0	0	1.39124	1.37917	CD63;CD81;PRDX1
superficial stratum of SC	3/300	0.371083	0.80209	0	0	1.39124	1.37917	RPS19;ND3;RPS12
superficial stratum of isLim	3/300	0.371083	0.80209	0	0	1.39124	1.37917	RPL30;PLAUR;YBX1
superficial stratum of p3ZL	3/300	0.371083	0.80209	0	0	1.39124	1.37917	CDKN1A;TIMP1;ZMPSTE24
superficial stratum of r10BM	3/300	0.371083	0.80209	0	0	1.39124	1.37917	APLP2;PSAP;CALR
superficial stratum of r1BM	3/300	0.371083	0.80209	0	0	1.39124	1.37917	ARPC2;MTDH;MCL1
superficial stratum of r3BI	3/300	0.371083	0.80209	0	0	1.39124	1.37917	RPS8;CSDE1;EEF2
superficial stratum of r5Tr	3/300	0.371083	0.80209	0	0	1.39124	1.37917	RPL30;ARPC2;RPL27A
superficial stratum of r6BI	3/300	0.371083	0.80209	0	0	1.39124	1.37917	MYL6;PSAP;ND3
superficial stratum of r7BI	3/300	0.371083	0.80209	0	0	1.39124	1.37917	MYL6;PSAP;HNRNPU
superficial stratum of r7BM	3/300	0.371083	0.80209	0	0	1.39124	1.37917	MYL6;PSAP;HNRNPU
superficial stratum of r7Co	3/300	0.371083	0.80209	0	0	1.39124	1.37917	HSP90AA1;RPL31;SMAP2
superficial stratum of r8BI	3/300	0.371083	0.80209	0	0	1.39124	1.37917	PSAP;CALR;MCL1
superficial stratum of r8BM	3/300	0.371083	0.80209	0	0	1.39124	1.37917	PSAP;CALR;SMAP2
superficial stratum of r9BI	3/300	0.371083	0.80209	0	0	1.39124	1.37917	PSAP;CALR;MCL1
tegmental field of p3 (Forel's field)	3/300	0.371083	0.80209	0	0	1.39124	1.37917	ARPC2;MSN;TAGLN2
terminal hypothalamus (rostral hypothalamus)	3/300	0.371083	0.80209	0	0	1.39124	1.37917	ATP5G3;RHOA;ATP5L
terminal subparaventricular area of THyA	3/300	0.371083	0.80209	0	0	1.39124	1.37917	ENO1;RHOA;ATP5L
upper dorsal lateral hypothalamic area	3/300	0.371083	0.80209	0	0	1.39124	1.37917	NRG4;FTH1;PFN1
ventral lateral nucleus	3/300	0.371083	0.80209	0	0	1.39124	1.37917	RPS19;PABPC4;RPS12
ventral pallidum	3/300	0.371083	0.80209	0	0	1.39124	1.37917	CD63;FTH1;S100A4
ventral paracommissural tectal nucleus, m1 part	3/300	0.371083	0.80209	0	0	1.39124	1.37917	PABPC4;YBX1;HSPG2
ventral part of CoP	3/300	0.371083	0.80209	0	0	1.39124	1.37917	ARPC2;YBX1;LCP1
ventral part of THyB	3/300	0.371083	0.80209	0	0	1.39124	1.37917	HSP90AA1;SH3BGRL3;ATP5G3
ventrolateral part of alar m1	3/300	0.371083	0.80209	0	0	1.39124	1.37917	ARPC2;NRG4;YBX1
ventrolateral part of isA	3/300	0.371083	0.80209	0	0	1.39124	1.37917	NRG4;PLAUR;ACTN4
ventrolateral part of m2A	3/300	0.371083	0.80209	0	0	1.39124	1.37917	BTG1;ARPC2;NRG4
ventromedial preoptic nucleus	3/300	0.371083	0.80209	0	0	1.39124	1.37917	RPS6;ENO1;ATP5L
ventropallial amygdalopiriform area	3/300	0.371083	0.80209	0	0	1.39124	1.37917	RAB31;ARPC2;PRDX1
ventropallial prepiriform area	3/300	0.371083	0.80209	0	0	1.39124	1.37917	CD63;ARPC2;PRDX1
Midbrain	4/430	0.379429	0.819149	0	0	1.29384	1.25385	RPS19;ACTN4;YBX1;LCP1
Presubiculum	4/442	0.399132	0.860659	0	0	1.25762	1.15508	NRG4;HMGA1;ND3;ZMPSTE24
Dentate gyrus	3/333	0.435294	0.897079	0	0	1.25	1.03967	SLC20A1;SPP1;ND3
Field CA3, stratum oriens	3/366	0.49699	0.897079	0	0	1.13444	0.793186	CDKN1A;ARPC2;SPP1
Anterior hypothalamic nucleus	4/511	0.509261	0.897079	0	0	1.0826	0.730534	ENO1;SERF2;RHOA;ATP5L
Anterodorsal nucleus	3/391	0.54144	0.897079	0	0	1.05999	0.650326	RPS19;YWHAB;EEF2
Lateral mammillary nucleus	3/411	0.575348	0.897079	0	0	1.00699	0.556645	CAP1;APLP2;MTDH
Paracentral nucleus	3/422	0.593326	0.897079	0	0	0.979999	0.51157	RPS19;PABPC4;RPS12
Laterodorsal tegmental nucleus	3/424	0.596542	0.897079	0	0	0.975243	0.503815	RGS16;LAPTM5;TAGLN2
Field CA2, stratum lacunosum-moleculare	3/426	0.599742	0.897079	0	0	0.970532	0.49619	SLC20A1;SPP1;IER3
Medial mammillary nucleus	3/438	0.618594	0.897079	0	0	0.943176	0.453013	HLA-A;ATP5G3;MTDH
lateral posterior nucleus	4/595	0.629716	0.897079	0	0	0.924698	0.42766	CDKN1A;CFL1;SPP1;ND3
superficial stratum of DG	4/596	0.631033	0.897079	0	0	0.923088	0.424987	CD63;SLC20A1;SPP1;ND3
Accessory facial motor nucleus	2/300	0.642536	0.897079	0	0	0.917867	0.406002	MMP14;SDC2
Agranular insular area, dorsal part, layer 2/3	2/300	0.642536	0.897079	0	0	0.917867	0.406002	RGS16;HMGA1
Agranular insular area, dorsal part, layer 5	2/300	0.642536	0.897079	0	0	0.917867	0.406002	MMP14;RGS16
Agranular insular area, ventral part	2/300	0.642536	0.897079	0	0	0.917867	0.406002	HMGA1;HSPG2
Agranular insular area, ventral part, layer 1	2/300	0.642536	0.897079	0	0	0.917867	0.406002	HMGA1;RPS11
Agranular insular area, ventral part, layer 6a	2/300	0.642536	0.897079	0	0	0.917867	0.406002	MMP14;HMGA1
Anterior amygdalar area	2/300	0.642536	0.897079	0	0	0.917867	0.406002	CD63;S100A4
Anterior cingulate area, ventral part, layer 5	2/300	0.642536	0.897079	0	0	0.917867	0.406002	DBI;RPL37
Anterior group of the dorsal thalamus	2/300	0.642536	0.897079	0	0	0.917867	0.406002	RPS19;PABPC4
Anterior hypothalamic nucleus, central part	2/300	0.642536	0.897079	0	0	0.917867	0.406002	ENO1;SERF2
Anterolateral visual area	2/300	0.642536	0.897079	0	0	0.917867	0.406002	NRG4;PABPC4
Anterolateral visual area, layer 6b	2/300	0.642536	0.897079	0	0	0.917867	0.406002	NRG4;SPP1
Anteroventral nucleus of thalamus	2/300	0.642536	0.897079	0	0	0.917867	0.406002	RPS19;PABPC4
Anteroventral periventricular nucleus	2/300	0.642536	0.897079	0	0	0.917867	0.406002	ENO1;SERF2
Anteroventral preoptic nucleus	2/300	0.642536	0.897079	0	0	0.917867	0.406002	LAPTM5;ENO1
Auditory areas	2/300	0.642536	0.897079	0	0	0.917867	0.406002	FCER1G;NRG4
Basolateral amygdalar nucleus	2/300	0.642536	0.897079	0	0	0.917867	0.406002	PRDX1;TIMP1
Basolateral amygdalar nucleus, ventral part	2/300	0.642536	0.897079	0	0	0.917867	0.406002	ARPC2;PRDX1
Basomedial amygdalar nucleus	2/300	0.642536	0.897079	0	0	0.917867	0.406002	PRDX1;S100A4
Basomedial amygdalar nucleus, anterior part	2/300	0.642536	0.897079	0	0	0.917867	0.406002	S100A4;HSPG2
Basomedial amygdalar nucleus, posterior part	2/300	0.642536	0.897079	0	0	0.917867	0.406002	PRDX1;S100A4
Bed nuclei of the stria terminalis	2/300	0.642536	0.897079	0	0	0.917867	0.406002	SLC20A1;ENO1
Bed nuclei of the stria terminalis, anterior division	2/300	0.642536	0.897079	0	0	0.917867	0.406002	SLC20A1;ENO1
Bed nuclei of the stria terminalis, anterior division, anteromedial area	2/300	0.642536	0.897079	0	0	0.917867	0.406002	SLC20A1;ENO1
Bed nuclei of the stria terminalis, anterior division, oval nucleus	2/300	0.642536	0.897079	0	0	0.917867	0.406002	SLC20A1;FTH1
Bed nuclei of the stria terminalis, anterior division, ventral nucleus	2/300	0.642536	0.897079	0	0	0.917867	0.406002	FTH1;ENO1
Central amygdalar nucleus	2/300	0.642536	0.897079	0	0	0.917867	0.406002	NRG4;S100A4
Central medial nucleus of the thalamus	2/300	0.642536	0.897079	0	0	0.917867	0.406002	RPS18;ZMPSTE24
Cortical amygdalar area, anterior part	2/300	0.642536	0.897079	0	0	0.917867	0.406002	SLC20A1;SQSTM1
Cortical amygdalar area, posterior part, lateral zone, layer 2	2/300	0.642536	0.897079	0	0	0.917867	0.406002	HSPG2;PFDN5
Cortical amygdalar area, posterior part, medial zone, layer 2	2/300	0.642536	0.897079	0	0	0.917867	0.406002	RAB31;FAU
Cortical subplate	2/300	0.642536	0.897079	0	0	0.917867	0.406002	PRDX1;TIMP1
Endopiriform nucleus, ventral part	2/300	0.642536	0.897079	0	0	0.917867	0.406002	PRDX1;HSPG2
Entorhinal area	2/300	0.642536	0.897079	0	0	0.917867	0.406002	RAB31;PFDN5
Entorhinal area, medial part, dorsal zone	2/300	0.642536	0.897079	0	0	0.917867	0.406002	RAB31;PFDN5
Entorhinal area, medial part, dorsal zone, layer 3	2/300	0.642536	0.897079	0	0	0.917867	0.406002	RAB31;PFDN5
Field CA1, pyramidal layer	2/300	0.642536	0.897079	0	0	0.917867	0.406002	SPP1;TIMP1
Field CA1, stratum pyramidale	2/300	0.642536	0.897079	0	0	0.917867	0.406002	SPP1;TIMP1
Field CA3, stratum pyramidale	2/300	0.642536	0.897079	0	0	0.917867	0.406002	CDKN1A;SPP1
Fundus of striatum	2/300	0.642536	0.897079	0	0	0.917867	0.406002	S100A4;HSPG2
Geniculate group, ventral thalamus	2/300	0.642536	0.897079	0	0	0.917867	0.406002	CDKN1A;ZMPSTE24
Gigantocellular reticular nucleus	2/300	0.642536	0.897079	0	0	0.917867	0.406002	H2AFY;LAPTM5
Gracile nucleus	2/300	0.642536	0.897079	0	0	0.917867	0.406002	RPS21;ACTG1
Granular lamina of the cochlear nuclei	2/300	0.642536	0.897079	0	0	0.917867	0.406002	RPL5;RPL37A
Gustatory areas, layer 6b	2/300	0.642536	0.897079	0	0	0.917867	0.406002	ARPC2;HMGA1
Hippocampal formation	2/300	0.642536	0.897079	0	0	0.917867	0.406002	SPP1;ND3
Hippocampal region	2/300	0.642536	0.897079	0	0	0.917867	0.406002	SPP1;ND3
Infralimbic area, layer 1	2/300	0.642536	0.897079	0	0	0.917867	0.406002	MSN;RPS24
Intermediodorsal nucleus of the thalamus	2/300	0.642536	0.897079	0	0	0.917867	0.406002	PABPC4;ZMPSTE24
Interpeduncular nucleus	2/300	0.642536	0.897079	0	0	0.917867	0.406002	MTDH;MCL1
JcP contribution to LTL	2/300	0.642536	0.897079	0	0	0.917867	0.406002	RPL30;ARPC2
JcPL part of the periaqueductal gray	2/300	0.642536	0.897079	0	0	0.917867	0.406002	CCL20;HNRNPU
JcPV part of the periaqueductal gray	2/300	0.642536	0.897079	0	0	0.917867	0.406002	CCL20;RPL37
Koelliker-Fuse subnucleus	2/300	0.642536	0.897079	0	0	0.917867	0.406002	RPL30;TAGLN2
Lateral septal nucleus, caudal (caudodorsal) part	2/300	0.642536	0.897079	0	0	0.917867	0.406002	RPL35A;IER3
Lateral visual area	2/300	0.642536	0.897079	0	0	0.917867	0.406002	NRG4;PABPC4
Lateral visual area, layer 6a	2/300	0.642536	0.897079	0	0	0.917867	0.406002	NRG4;PABPC4
Magnocellular nucleus	2/300	0.642536	0.897079	0	0	0.917867	0.406002	CD63;S100A4
Medial amygdalar nucleus, posterodorsal part, sublayer a	2/300	0.642536	0.897079	0	0	0.917867	0.406002	RAB31;ARPC2
Medial preoptic area	2/300	0.642536	0.897079	0	0	0.917867	0.406002	ENO1;SERF2
Medial preoptic nucleus, lateral part	2/300	0.642536	0.897079	0	0	0.917867	0.406002	ENO1;ATP5L
Mediodorsal nucleus of the thalamus, central part	2/300	0.642536	0.897079	0	0	0.917867	0.406002	RPL35A;RPS12
Medullary reticular nucleus, ventral part	2/300	0.642536	0.897079	0	0	0.917867	0.406002	H2AFY;RPS21
Nucleus ambiguus	2/300	0.642536	0.897079	0	0	0.917867	0.406002	H2AFY;PLAUR
Nucleus of the lateral olfactory tract, layer 3	2/300	0.642536	0.897079	0	0	0.917867	0.406002	SLC20A1;S100A4
Orbital area, medial part, layer 1	2/300	0.642536	0.897079	0	0	0.917867	0.406002	LCP1;RPS24
Orbital area, ventrolateral part	2/300	0.642536	0.897079	0	0	0.917867	0.406002	CD81;RPS24
Orbital area, ventrolateral part, layer 2/3	2/300	0.642536	0.897079	0	0	0.917867	0.406002	CD81;RPS24
Pallidum	2/300	0.642536	0.897079	0	0	0.917867	0.406002	FTH1;PFN1
Pallidum, caudal region	2/300	0.642536	0.897079	0	0	0.917867	0.406002	SLC20A1;ENO1
Pallidum, dorsal region	2/300	0.642536	0.897079	0	0	0.917867	0.406002	ARPC2;NRG4
Parabrachial nucleus	2/300	0.642536	0.897079	0	0	0.917867	0.406002	TAGLN2;TIMP1
Parabrachial nucleus, medial division, medial medial part	2/300	0.642536	0.897079	0	0	0.917867	0.406002	TAGLN2;TIMP1
Parvicellular reticular nucleus	2/300	0.642536	0.897079	0	0	0.917867	0.406002	FCER1G;H2AFY
PcPV part of the periaqueductal gray	2/300	0.642536	0.897079	0	0	0.917867	0.406002	RPL37;HLA-A
Periventricular hypothalamic nucleus, posterior part	2/300	0.642536	0.897079	0	0	0.917867	0.406002	ATP5G3;EEF2
Piriform area	2/300	0.642536	0.897079	0	0	0.917867	0.406002	CD63;PRDX1
Piriform area, polymorph layer	2/300	0.642536	0.897079	0	0	0.917867	0.406002	CD63;PRDX1
Piriform-amygdalar area, polymorph layer	2/300	0.642536	0.897079	0	0	0.917867	0.406002	PRDX1;HSPG2
Pons	2/300	0.642536	0.897079	0	0	0.917867	0.406002	GAPDH;DUSP6
Pons, sensory related	2/300	0.642536	0.897079	0	0	0.917867	0.406002	RPL30;PLAUR
Posterior amygdalar nucleus	2/300	0.642536	0.897079	0	0	0.917867	0.406002	RAB31;PRDX1
Posterior hypothalamic nucleus	2/300	0.642536	0.897079	0	0	0.917867	0.406002	ARPC2;MTDH
Posterior limiting nucleus of the thalamus	2/300	0.642536	0.897079	0	0	0.917867	0.406002	RPL30;BTG1
Posterior parietal association areas, layer 4	2/300	0.642536	0.897079	0	0	0.917867	0.406002	HMGA1;DBI
Posterodorsal preoptic nucleus	2/300	0.642536	0.897079	0	0	0.917867	0.406002	RPL27;ENO1
Posterolateral visual area	2/300	0.642536	0.897079	0	0	0.917867	0.406002	NRG4;HMGA1
Posterolateral visual area, layer 2/3	2/300	0.642536	0.897079	0	0	0.917867	0.406002	NRG4;HMGA1
Posterolateral visual area, layer 5	2/300	0.642536	0.897079	0	0	0.917867	0.406002	NRG4;PABPC4
Postpiriform transition area	2/300	0.642536	0.897079	0	0	0.917867	0.406002	RAB31;HSPG2
Postpiriform transition area, layers 1	2/300	0.642536	0.897079	0	0	0.917867	0.406002	RPS14;RAB31
Postpiriform transition area, layers 2	2/300	0.642536	0.897079	0	0	0.917867	0.406002	RPS14;RAB31
Postpiriform transition area, layers 3	2/300	0.642536	0.897079	0	0	0.917867	0.406002	RAB31;HSPG2
Postsubiculum	2/300	0.642536	0.897079	0	0	0.917867	0.406002	HMGA1;ZMPSTE24
Postsubiculum, layer 3	2/300	0.642536	0.897079	0	0	0.917867	0.406002	HMGA1;ZMPSTE24
Prelimbic area, layer 2	2/300	0.642536	0.897079	0	0	0.917867	0.406002	RPL37;RPS24
Prelimbic area, layer 2/3	2/300	0.642536	0.897079	0	0	0.917867	0.406002	DBI;RPS24
Prelimbic area, layer 5	2/300	0.642536	0.897079	0	0	0.917867	0.406002	DBI;RPS24
Prelimbic area, layer 6b	2/300	0.642536	0.897079	0	0	0.917867	0.406002	TAGLN2;HSPG2
Primary motor area, Layer 6a	2/300	0.642536	0.897079	0	0	0.917867	0.406002	SDC2;MMP9
Primary motor area, Layer 6b	2/300	0.642536	0.897079	0	0	0.917867	0.406002	SDC2;MMP9
Primary somatosensory area, barrel field	2/300	0.642536	0.897079	0	0	0.917867	0.406002	NRG4;TIMP1
Primary somatosensory area, barrel field, layer 5	2/300	0.642536	0.897079	0	0	0.917867	0.406002	NRG4;TIMP1
Primary somatosensory area, barrel field, layer 6a	2/300	0.642536	0.897079	0	0	0.917867	0.406002	NRG4;TIMP1
Primary somatosensory area, nose, layer 6b	2/300	0.642536	0.897079	0	0	0.917867	0.406002	ARPC2;ZMPSTE24
Primary visual area, layer 2/3	2/300	0.642536	0.897079	0	0	0.917867	0.406002	HMGA1;DBI
Retrosplenial area, lateral agranular part, layer 6a	2/300	0.642536	0.897079	0	0	0.917867	0.406002	SDC2;MMP9
Retrosplenial area, ventral part, layer 6b	2/300	0.642536	0.897079	0	0	0.917867	0.406002	SDC2;MMP9
Secondary motor area, layer 6b	2/300	0.642536	0.897079	0	0	0.917867	0.406002	FCER1G;MMP9
Spinal nucleus of the trigeminal, oral part, rostral dorsomedial part	2/300	0.642536	0.897079	0	0	0.917867	0.406002	RPL30;ARPC2
Spinal nucleus of the trigeminal, oral part, ventrolateral part	2/300	0.642536	0.897079	0	0	0.917867	0.406002	RPL30;RPL27A
Striatum	2/300	0.642536	0.897079	0	0	0.917867	0.406002	SLC20A1;FAU
Striatum ventral region	2/300	0.642536	0.897079	0	0	0.917867	0.406002	CD81;PRDX1
Subceruleus nucleus	2/300	0.642536	0.897079	0	0	0.917867	0.406002	TAGLN2;TIMP1
Subparafascicular area	2/300	0.642536	0.897079	0	0	0.917867	0.406002	RPS18;HLA-A
Subparafascicular nucleus, magnocellular part	2/300	0.642536	0.897079	0	0	0.917867	0.406002	RPS18;HLA-A
Superior colliculus, motor related, intermediate gray layer, sublayer a	2/300	0.642536	0.897079	0	0	0.917867	0.406002	LCP1;RPS12
Superior colliculus, motor related, intermediate gray layer, sublayer b	2/300	0.642536	0.897079	0	0	0.917867	0.406002	YBX1;RPS12
Superior colliculus, motor related, intermediate gray layer, sublayer c	2/300	0.642536	0.897079	0	0	0.917867	0.406002	CCL20;LCP1
Taenia tecta, ventral part	2/300	0.642536	0.897079	0	0	0.917867	0.406002	RGS16;RPL27
Taenia tecta, ventral part, layer 2	2/300	0.642536	0.897079	0	0	0.917867	0.406002	LAPTM5;RPL27
Temporal association areas	2/300	0.642536	0.897079	0	0	0.917867	0.406002	ARPC2;PABPC4
Tuberomammillary nucleus	2/300	0.642536	0.897079	0	0	0.917867	0.406002	ATP5G3;EEF2
Ventral cochlear nucleus	2/300	0.642536	0.897079	0	0	0.917867	0.406002	LASP1;RPL37A
Ventral part of the lateral geniculate complex	2/300	0.642536	0.897079	0	0	0.917867	0.406002	CDKN1A;ZMPSTE24
Ventral posteromedial nucleus of the thalamus	2/300	0.642536	0.897079	0	0	0.917867	0.406002	PABPC4;RPS12
Ventral tegmental area	2/300	0.642536	0.897079	0	0	0.917867	0.406002	ARPC2;MTDH
Vestibular nuclei	2/300	0.642536	0.897079	0	0	0.917867	0.406002	HNRNPU;RPS21
Visceral area	2/300	0.642536	0.897079	0	0	0.917867	0.406002	HMGA1;HSPG2
Visceral area, layer 6a	2/300	0.642536	0.897079	0	0	0.917867	0.406002	HMGA1;HSPG2
Visceral area, layer 6b	2/300	0.642536	0.897079	0	0	0.917867	0.406002	HMGA1;HSPG2
amygdalo-striatal transition	2/300	0.642536	0.897079	0	0	0.917867	0.406002	GDF15;S100A4
amygdalohippocampal area	2/300	0.642536	0.897079	0	0	0.917867	0.406002	RAB31;PRDX1
anterior olfactory area, dorsal part	2/300	0.642536	0.897079	0	0	0.917867	0.406002	CD81;TAGLN2
anterior olfactory area, ventral part	2/300	0.642536	0.897079	0	0	0.917867	0.406002	CD81;RPS8
anterior pretectal nucleus, dorsal core part	2/300	0.642536	0.897079	0	0	0.917867	0.406002	RPS19;ACTN4
anterior pretectal nucleus, dorsal superficial part	2/300	0.642536	0.897079	0	0	0.917867	0.406002	CDKN1A;SPP1
basal plate of m1	2/300	0.642536	0.897079	0	0	0.917867	0.406002	ARPC2;DUSP6
basal reticular formation of p1	2/300	0.642536	0.897079	0	0	0.917867	0.406002	S100A6;ACTN4
basolateral amygdaloid nucleus, anterior part	2/300	0.642536	0.897079	0	0	0.917867	0.406002	PRDX1;HSPG2
basolateral amygdaloid nucleus, posterior part	2/300	0.642536	0.897079	0	0	0.917867	0.406002	PRDX1;TIMP1
basolateral amygdaloid nucleus, ventral part	2/300	0.642536	0.897079	0	0	0.917867	0.406002	ARPC2;PRDX1
bed nucleus of stria terminalis, lateral amygdaloid division	2/300	0.642536	0.897079	0	0	0.917867	0.406002	SLC20A1;S100A4
bed nucleus of the stria terminalis, mediocentral division	2/300	0.642536	0.897079	0	0	0.917867	0.406002	SLC20A1;HMGA1
bed nucleus of the stria terminalis, medioseptal division	2/300	0.642536	0.897079	0	0	0.917867	0.406002	SLC20A1;LAPTM5
caudal interpeduncular nucleus	2/300	0.642536	0.897079	0	0	0.917867	0.406002	MTDH;MCL1
caudate nucleus	2/300	0.642536	0.897079	0	0	0.917867	0.406002	HMGA1;FAU
central lateral nucleus	2/300	0.642536	0.897079	0	0	0.917867	0.406002	RPS19;RPS12
centromedian nucleus	2/300	0.642536	0.897079	0	0	0.917867	0.406002	HLA-A;ZMPSTE24
cingulate cortex	2/300	0.642536	0.897079	0	0	0.917867	0.406002	SDC2;DBI
commissural pretectal domain	2/300	0.642536	0.897079	0	0	0.917867	0.406002	ACTN4;LCP1
core part of the anterobasal nucleus	2/300	0.642536	0.897079	0	0	0.917867	0.406002	RHOA;ATP5L
corticoid layer of TuPal	2/300	0.642536	0.897079	0	0	0.917867	0.406002	RAB31;CD81
dorsal part of THyB	2/300	0.642536	0.897079	0	0	0.917867	0.406002	ATP5G3;ATP5L
dorsolateral part of Int	2/300	0.642536	0.897079	0	0	0.917867	0.406002	RPS11;RPS21
dorsomedial preoptic area, superficial part	2/300	0.642536	0.897079	0	0	0.917867	0.406002	ENO1;CTSD
dorsomedial tegmental nucleus	2/300	0.642536	0.897079	0	0	0.917867	0.406002	RPL27;RPL37
external part of AOD	2/300	0.642536	0.897079	0	0	0.917867	0.406002	EEF2;RPS24
first (dorsal) preoptic domain	2/300	0.642536	0.897079	0	0	0.917867	0.406002	ENO1;SERF2
hilus of the DG	2/300	0.642536	0.897079	0	0	0.917867	0.406002	RAB31;SPP1
hippocampus (cortex Ammonis)	2/300	0.642536	0.897079	0	0	0.917867	0.406002	SPP1;ND3
intercalate nucleus	2/300	0.642536	0.897079	0	0	0.917867	0.406002	TAGLN2;TIMP1
intercalated amygdaloid nuclei	2/300	0.642536	0.897079	0	0	0.917867	0.406002	PRDX1;S100A4
intermediate part of r10B	2/300	0.642536	0.897079	0	0	0.917867	0.406002	CD63;H2AFY
intermediate part of r5B	2/300	0.642536	0.897079	0	0	0.917867	0.406002	MMP14;B2M
intermediate part of r7B	2/300	0.642536	0.897079	0	0	0.917867	0.406002	LAPTM5;RPL37
intermediate part of r8B	2/300	0.642536	0.897079	0	0	0.917867	0.406002	H2AFY;B2M
intermediate stratum of CoPV	2/300	0.642536	0.897079	0	0	0.917867	0.406002	ARPC2;ACTN4
intermediate stratum of JcPD	2/300	0.642536	0.897079	0	0	0.917867	0.406002	ARPC2;HNRNPU
intermediate stratum of JcPL	2/300	0.642536	0.897079	0	0	0.917867	0.406002	ARPC2;ACTN4
intermediate stratum of Pal	2/300	0.642536	0.897079	0	0	0.917867	0.406002	CDKN1A;S100A4
intermediate stratum of PcPL	2/300	0.642536	0.897079	0	0	0.917867	0.406002	RPS19;ACTN4
intermediate stratum of THyB-D	2/300	0.642536	0.897079	0	0	0.917867	0.406002	ARPC2;ATP5L
intermediate stratum of THyB-V	2/300	0.642536	0.897079	0	0	0.917867	0.406002	HLA-A;ATP5G3
intermediate stratum of m1B	2/300	0.642536	0.897079	0	0	0.917867	0.406002	S100A6;LAPTM5
intermediate stratum of m2AL	2/300	0.642536	0.897079	0	0	0.917867	0.406002	ACTN4;YBX1
intermediate stratum of m2Lim	2/300	0.642536	0.897079	0	0	0.917867	0.406002	RPL30;ARPC2
intermediate stratum of p1Lim	2/300	0.642536	0.897079	0	0	0.917867	0.406002	RPL30;ARPC2
intermediate stratum of p3ZL	2/300	0.642536	0.897079	0	0	0.917867	0.406002	TAGLN2;TIMP1
intermediate stratum of r10BL	2/300	0.642536	0.897079	0	0	0.917867	0.406002	H2AFY;RPS3
intermediate stratum of r2BI	2/300	0.642536	0.897079	0	0	0.917867	0.406002	TAGLN2;RPL27
intermediate stratum of r3BI	2/300	0.642536	0.897079	0	0	0.917867	0.406002	MSN;RPL27
intermediate stratum of r3Tr	2/300	0.642536	0.897079	0	0	0.917867	0.406002	RPL30;ARPC2
intermediate stratum of r4Tr	2/300	0.642536	0.897079	0	0	0.917867	0.406002	FCER1G;ARPC2
intermediate stratum of r5Tr	2/300	0.642536	0.897079	0	0	0.917867	0.406002	FCER1G;ARPC2
intermediate stratum of r6Tr	2/300	0.642536	0.897079	0	0	0.917867	0.406002	MMP14;FCER1G
intermediate stratum of r7Tr	2/300	0.642536	0.897079	0	0	0.917867	0.406002	H2AFY;RPL11
intermediate stratum of r8BM	2/300	0.642536	0.897079	0	0	0.917867	0.406002	ARPC2;B2M
intermediate tier of thalamus	2/300	0.642536	0.897079	0	0	0.917867	0.406002	ARPC2;MMP9
interstitial nucleus of the posterior limb of the anterior commissure	2/300	0.642536	0.897079	0	0	0.917867	0.406002	S100A4;HSPG2
isthmic liminal reticular area	2/300	0.642536	0.897079	0	0	0.917867	0.406002	TYROBP;YBX1
juxtacommissural pretectal domain	2/300	0.642536	0.897079	0	0	0.917867	0.406002	ACTN4;MMP9
lateral (parvicellular) part of MD	2/300	0.642536	0.897079	0	0	0.917867	0.406002	RPS19;RPS12
lateral TG part of the periaqueductal gray	2/300	0.642536	0.897079	0	0	0.917867	0.406002	ACTN4;YBX1
lateral part of CoP	2/300	0.642536	0.897079	0	0	0.917867	0.406002	ARPC2;ACTN4
lateral part of JcP	2/300	0.642536	0.897079	0	0	0.917867	0.406002	ACTN4;MMP9
lateral part of MM	2/300	0.642536	0.897079	0	0	0.917867	0.406002	ATP5G3;MTDH
lateral part of MPO	2/300	0.642536	0.897079	0	0	0.917867	0.406002	ENO1;SERF2
lateral part of alar m1	2/300	0.642536	0.897079	0	0	0.917867	0.406002	ACTN4;YBX1
lateral part of alar p3	2/300	0.642536	0.897079	0	0	0.917867	0.406002	CDKN1A;MMP9
lateral part of r10B	2/300	0.642536	0.897079	0	0	0.917867	0.406002	H2AFY;RPS3
lateral part of r5B	2/300	0.642536	0.897079	0	0	0.917867	0.406002	SDC2;PPT1
lateral part of r9B	2/300	0.642536	0.897079	0	0	0.917867	0.406002	MMP14;H2AFY
lateral septal nucleus, dorsal part	2/300	0.642536	0.897079	0	0	0.917867	0.406002	RPL35A;ENO1
lateral terminal nucleus of the accessory optic tract, lateral part	2/300	0.642536	0.897079	0	0	0.917867	0.406002	SH3BGRL3;RPS12
lateral terminal nucleus of the accessory optic tract, ventral part	2/300	0.642536	0.897079	0	0	0.917867	0.406002	RPL30;RPS12
lateral trapezoid nucleus	2/300	0.642536	0.897079	0	0	0.917867	0.406002	MYL6;ND3
laterodorsal nucleus	2/300	0.642536	0.897079	0	0	0.917867	0.406002	PABPC4;ACTG1
lateropallial amygdalopiriform area	2/300	0.642536	0.897079	0	0	0.917867	0.406002	RAB31;PRDX1
lateropallial prepiriform area	2/300	0.642536	0.897079	0	0	0.917867	0.406002	CD63;PRDX1
laterostriatal stripe	2/300	0.642536	0.897079	0	0	0.917867	0.406002	MMP14;HSPG2
layer 1 of CCx	2/300	0.642536	0.897079	0	0	0.917867	0.406002	PABPC4;RPS12
layer 1 of PaS	2/300	0.642536	0.897079	0	0	0.917867	0.406002	FAU;PFDN5
layer 2 of CCx	2/300	0.642536	0.897079	0	0	0.917867	0.406002	PABPC4;RPS12
layer 2 of ERCx	2/300	0.642536	0.897079	0	0	0.917867	0.406002	RAB31;PFDN5
layer 2 of LPrP cortex	2/300	0.642536	0.897079	0	0	0.917867	0.406002	CD63;PRDX1
layer 2 of VPrP cortex	2/300	0.642536	0.897079	0	0	0.917867	0.406002	CD63;PRDX1
layer 3 of ERCx	2/300	0.642536	0.897079	0	0	0.917867	0.406002	RAB31;PFDN5
layer 3 of PrS	2/300	0.642536	0.897079	0	0	0.917867	0.406002	HMGA1;ZMPSTE24
layer 3 of VPrP cortex	2/300	0.642536	0.897079	0	0	0.917867	0.406002	CD63;PRDX1
layer 4 of ERCx	2/300	0.642536	0.897079	0	0	0.917867	0.406002	RAB31;TIMP1
layer 4 of PRh-Ect	2/300	0.642536	0.897079	0	0	0.917867	0.406002	NRG4;PABPC4
layer 4 of PaS	2/300	0.642536	0.897079	0	0	0.917867	0.406002	ARPC2;NRG4
layer 5 of CCx	2/300	0.642536	0.897079	0	0	0.917867	0.406002	SDC2;DBI
layer 5 of ERCx	2/300	0.642536	0.897079	0	0	0.917867	0.406002	RAB31;TIMP1
layer 5 of PrS	2/300	0.642536	0.897079	0	0	0.917867	0.406002	SPP1;ZMPSTE24
layer 6 of InsCx	2/300	0.642536	0.897079	0	0	0.917867	0.406002	NRG4;TIMP1
layer 6a of PaS	2/300	0.642536	0.897079	0	0	0.917867	0.406002	HMGA1;ZMPSTE24
layer 6b of PaS	2/300	0.642536	0.897079	0	0	0.917867	0.406002	HMGA1;ZMPSTE24
liminal alar domain of m1	2/300	0.642536	0.897079	0	0	0.917867	0.406002	NRG4;YBX1
liminal alar domain of m2	2/300	0.642536	0.897079	0	0	0.917867	0.406002	BTG1;NRG4
liminal part of alar r1	2/300	0.642536	0.897079	0	0	0.917867	0.406002	TAGLN2;RPL27
liminal part of the r6 alar plate	2/300	0.642536	0.897079	0	0	0.917867	0.406002	MMP14;HNRNPU
m1Lim part of the midbrain reticular formation	2/300	0.642536	0.897079	0	0	0.917867	0.406002	RPL30;BTG1
m2 alar plate	2/300	0.642536	0.897079	0	0	0.917867	0.406002	ACTN4;YBX1
magnocellular diagonal band nucleus	2/300	0.642536	0.897079	0	0	0.917867	0.406002	CD63;RPL30
mammillary area	2/300	0.642536	0.897079	0	0	0.917867	0.406002	ATP5G3;MTDH
mammillary part of THyB	2/300	0.642536	0.897079	0	0	0.917867	0.406002	ATP5G3;MTDH
mantle zone of AOD	2/300	0.642536	0.897079	0	0	0.917867	0.406002	CD81;TAGLN2
mantle zone of AOV	2/300	0.642536	0.897079	0	0	0.917867	0.406002	CD81;RPS8
mantle zone of APal	2/300	0.642536	0.897079	0	0	0.917867	0.406002	S100A4;FAU
mantle zone of CA	2/300	0.642536	0.897079	0	0	0.917867	0.406002	SPP1;ND3
mantle zone of CCx	2/300	0.642536	0.897079	0	0	0.917867	0.406002	SDC2;DBI
mantle zone of CoPV	2/300	0.642536	0.897079	0	0	0.917867	0.406002	YBX1;LCP1
mantle zone of JcPL	2/300	0.642536	0.897079	0	0	0.917867	0.406002	ACTN4;MMP9
mantle zone of LPrP	2/300	0.642536	0.897079	0	0	0.917867	0.406002	CD63;PRDX1
mantle zone of Mam	2/300	0.642536	0.897079	0	0	0.917867	0.406002	ATP5G3;MTDH
mantle zone of PHyB-V	2/300	0.642536	0.897079	0	0	0.917867	0.406002	ATP5L;MTDH
mantle zone of PO1	2/300	0.642536	0.897079	0	0	0.917867	0.406002	ENO1;SERF2
mantle zone of Pal	2/300	0.642536	0.897079	0	0	0.917867	0.406002	CDKN1A;S100A4
mantle zone of PcPV	2/300	0.642536	0.897079	0	0	0.917867	0.406002	ACTN4;YBX1
mantle zone of RtC	2/300	0.642536	0.897079	0	0	0.917867	0.406002	CDKN1A;MMP9
mantle zone of THyB-D	2/300	0.642536	0.897079	0	0	0.917867	0.406002	ATP5G3;ATP5L
mantle zone of THyB-I	2/300	0.642536	0.897079	0	0	0.917867	0.406002	ARPC2;ATP5L
mantle zone of VAP	2/300	0.642536	0.897079	0	0	0.917867	0.406002	RAB31;PRDX1
mantle zone of VPrP	2/300	0.642536	0.897079	0	0	0.917867	0.406002	CD63;PRDX1
mantle zone of VTTh	2/300	0.642536	0.897079	0	0	0.917867	0.406002	ARPC2;NRG4
mantle zone of isBL	2/300	0.642536	0.897079	0	0	0.917867	0.406002	ARPC2;ACTN4
mantle zone of m1AL	2/300	0.642536	0.897079	0	0	0.917867	0.406002	ACTN4;YBX1
mantle zone of m2AD	2/300	0.642536	0.897079	0	0	0.917867	0.406002	ARPC2;PABPC4
mantle zone of m2Lim	2/300	0.642536	0.897079	0	0	0.917867	0.406002	BTG1;NRG4
mantle zone of p1Lim	2/300	0.642536	0.897079	0	0	0.917867	0.406002	S100A6;ACTN4
mantle zone of r10BI	2/300	0.642536	0.897079	0	0	0.917867	0.406002	CD63;H2AFY
mantle zone of r10BL	2/300	0.642536	0.897079	0	0	0.917867	0.406002	H2AFY;RPS3
mantle zone of r1BL	2/300	0.642536	0.897079	0	0	0.917867	0.406002	ARPC2;DUSP6
mantle zone of r1BM	2/300	0.642536	0.897079	0	0	0.917867	0.406002	ARPC2;MCL1
mantle zone of r2Co	2/300	0.642536	0.897079	0	0	0.917867	0.406002	RPL27A;RPS11
mantle zone of r2Lim	2/300	0.642536	0.897079	0	0	0.917867	0.406002	ARPC2;RPL27
mantle zone of r3BL	2/300	0.642536	0.897079	0	0	0.917867	0.406002	ARPC2;DUSP6
mantle zone of r3Co	2/300	0.642536	0.897079	0	0	0.917867	0.406002	RPL37A;RPS11
mantle zone of r5BI	2/300	0.642536	0.897079	0	0	0.917867	0.406002	MMP14;B2M
mantle zone of r5BL	2/300	0.642536	0.897079	0	0	0.917867	0.406002	SDC2;PPT1
mantle zone of r5Co	2/300	0.642536	0.897079	0	0	0.917867	0.406002	RPS16;SMAP2
mantle zone of r5Tr	2/300	0.642536	0.897079	0	0	0.917867	0.406002	GRN;FCER1G
mantle zone of r6Lim	2/300	0.642536	0.897079	0	0	0.917867	0.406002	MMP14;HNRNPU
mantle zone of r6Tr	2/300	0.642536	0.897079	0	0	0.917867	0.406002	FCER1G;H2AFY
mantle zone of r7BI	2/300	0.642536	0.897079	0	0	0.917867	0.406002	LAPTM5;RPL37
mantle zone of r8BI	2/300	0.642536	0.897079	0	0	0.917867	0.406002	H2AFY;B2M
mantle zone of r9BL	2/300	0.642536	0.897079	0	0	0.917867	0.406002	MMP14;H2AFY
medial (magnocellular) part of MD	2/300	0.642536	0.897079	0	0	0.917867	0.406002	RPS19;PABPC4
medial amygdala, anterodorsal part	2/300	0.642536	0.897079	0	0	0.917867	0.406002	SLC20A1;FTH1
medial amygdala, posterodorsal part	2/300	0.642536	0.897079	0	0	0.917867	0.406002	FTH1;SERF2
medial amygdala, posteroventral part	2/300	0.642536	0.897079	0	0	0.917867	0.406002	RAB31;RHOA
medial pallium (hippocampal allocortex)	2/300	0.642536	0.897079	0	0	0.917867	0.406002	SPP1;ND3
medial part of MPO	2/300	0.642536	0.897079	0	0	0.917867	0.406002	FTH1;ENO1
medial part of r4B	2/300	0.642536	0.897079	0	0	0.917867	0.406002	MMP14;ARPC2
medial trapezoid nucleus	2/300	0.642536	0.897079	0	0	0.917867	0.406002	MYL6;OAZ1
mediodorsal nucleus	2/300	0.642536	0.897079	0	0	0.917867	0.406002	RPS19;RPS12
navicular nucleus	2/300	0.642536	0.897079	0	0	0.917867	0.406002	LAPTM5;RPL27
nucleus of the central acoustic tract	2/300	0.642536	0.897079	0	0	0.917867	0.406002	RPL30;BTG1
nucleus of the inferior collicular brachium, caudal part	2/300	0.642536	0.897079	0	0	0.917867	0.406002	RPL30;ARPC2
nucleus of the inferior collicular brachium, rostral part	2/300	0.642536	0.897079	0	0	0.917867	0.406002	RPL30;ZMPSTE24
nucleus of the stria terminalis, medial division, anterior part	2/300	0.642536	0.897079	0	0	0.917867	0.406002	SLC20A1;LAPTM5
nucleus sagulum, deep part	2/300	0.642536	0.897079	0	0	0.917867	0.406002	ACTN4;YBX1
p1 portion of the paranigral nucleus	2/300	0.642536	0.897079	0	0	0.917867	0.406002	ARPC2;MTDH
p1B part of the periaqueductal gray	2/300	0.642536	0.897079	0	0	0.917867	0.406002	CFL1;RPL37
p2 part of the zona limitans core population	2/300	0.642536	0.897079	0	0	0.917867	0.406002	CDKN1A;TAGLN2
p3 portion of parabrachial pigmented nucleus	2/300	0.642536	0.897079	0	0	0.917867	0.406002	LAPTM5;MTDH
p3 portion of the substantia nigra pars compacta	2/300	0.642536	0.897079	0	0	0.917867	0.406002	ARPC2;MSN
pallidal amygdala	2/300	0.642536	0.897079	0	0	0.917867	0.406002	S100A4;FAU
pallidum (globus pallidus complex)	2/300	0.642536	0.897079	0	0	0.917867	0.406002	CDKN1A;S100A4
peduncular paraventricular area of PHyA	2/300	0.642536	0.897079	0	0	0.917867	0.406002	ARPC2;SERF2
periventricular part of StrSe	2/300	0.642536	0.897079	0	0	0.917867	0.406002	SLC20A1;RPL35A
periventricular stratum of APal	2/300	0.642536	0.897079	0	0	0.917867	0.406002	SLC20A1;S100A4
periventricular stratum of AStr	2/300	0.642536	0.897079	0	0	0.917867	0.406002	GDF15;S100A4
periventricular stratum of ITTh	2/300	0.642536	0.897079	0	0	0.917867	0.406002	PABPC4;RPL37
periventricular stratum of JcPV	2/300	0.642536	0.897079	0	0	0.917867	0.406002	CCL20;RPL37
periventricular stratum of PalSe	2/300	0.642536	0.897079	0	0	0.917867	0.406002	ARPC2;SLC20A1
periventricular stratum of PcPV	2/300	0.642536	0.897079	0	0	0.917867	0.406002	RPL37;HLA-A
periventricular stratum of SeDg	2/300	0.642536	0.897079	0	0	0.917867	0.406002	SLC20A1;LAPTM5
periventricular stratum of Str	2/300	0.642536	0.897079	0	0	0.917867	0.406002	HMGA1;FAU
periventricular stratum of TPaA	2/300	0.642536	0.897079	0	0	0.917867	0.406002	ENO1;RHOA
periventricular stratum of isLim	2/300	0.642536	0.897079	0	0	0.917867	0.406002	TAGLN2;ACTN4
periventricular stratum of m1AL	2/300	0.642536	0.897079	0	0	0.917867	0.406002	ACTN4;YBX1
periventricular stratum of p1B	2/300	0.642536	0.897079	0	0	0.917867	0.406002	CFL1;RPL37
periventricular stratum of r10BM	2/300	0.642536	0.897079	0	0	0.917867	0.406002	CD63;HLA-A
periventricular stratum of r10Lim	2/300	0.642536	0.897079	0	0	0.917867	0.406002	CD63;HLA-A
periventricular stratum of r1BM	2/300	0.642536	0.897079	0	0	0.917867	0.406002	TAGLN2;RPL27
periventricular stratum of r1Ve	2/300	0.642536	0.897079	0	0	0.917867	0.406002	RPL30;RPS3
periventricular stratum of r2Ve	2/300	0.642536	0.897079	0	0	0.917867	0.406002	RPS14;RPL30
periventricular stratum of r3Co	2/300	0.642536	0.897079	0	0	0.917867	0.406002	RPL27A;RPS11
periventricular stratum of r8Ve	2/300	0.642536	0.897079	0	0	0.917867	0.406002	RPL11;RPS21
polymorph layer of TuPal	2/300	0.642536	0.897079	0	0	0.917867	0.406002	CD63;PRDX1
posterior paraventricular nucleus	2/300	0.642536	0.897079	0	0	0.917867	0.406002	ARPC2;PABPC4
posteroventral part of alar p3	2/300	0.642536	0.897079	0	0	0.917867	0.406002	CDKN1A;S100A6
precommissural pretectal domain	2/300	0.642536	0.897079	0	0	0.917867	0.406002	PLIN2;ACTN4
pregeniculate nucleus	2/300	0.642536	0.897079	0	0	0.917867	0.406002	CDKN1A;ZMPSTE24
preoptic alar plate	2/300	0.642536	0.897079	0	0	0.917867	0.406002	ENO1;SERF2
preoptic area	2/300	0.642536	0.897079	0	0	0.917867	0.406002	ENO1;SERF2
preoptic telencephalon	2/300	0.642536	0.897079	0	0	0.917867	0.406002	ENO1;SERF2
principal pretectal nucleus	2/300	0.642536	0.897079	0	0	0.917867	0.406002	NRG4;LCP1
putamen	2/300	0.642536	0.897079	0	0	0.917867	0.406002	ARPC2;NRG4
r1 part of dorsal raphe nucleus	2/300	0.642536	0.897079	0	0	0.917867	0.406002	TAGLN2;RPL27
r1 part of vestibular nucleus Y	2/300	0.642536	0.897079	0	0	0.917867	0.406002	RPL30;RPS3
r1 part of vestibulocerebellar nucleus	2/300	0.642536	0.897079	0	0	0.917867	0.406002	RPL30;ARPC2
r10 part of basointermediate reticular formation	2/300	0.642536	0.897079	0	0	0.917867	0.406002	H2AFY;LAPTM5
r10 part of basolateral reticular formation	2/300	0.642536	0.897079	0	0	0.917867	0.406002	H2AFY;RPS3
r10 part of gigantocellular reticular area	2/300	0.642536	0.897079	0	0	0.917867	0.406002	HNRNPU;CALR
r10 part of vagal motor nucleus	2/300	0.642536	0.897079	0	0	0.917867	0.406002	CD63;HLA-A
r10 portion of the hypoglossal motor nucleus	2/300	0.642536	0.897079	0	0	0.917867	0.406002	CD63;HLA-A
r2 part of anteroventral cochlear nucleus	2/300	0.642536	0.897079	0	0	0.917867	0.406002	RPL27A;RPS11
r2 part of basointermediate reticular formation	2/300	0.642536	0.897079	0	0	0.917867	0.406002	TAGLN2;RPL27
r2 part of cochlear sensory column	2/300	0.642536	0.897079	0	0	0.917867	0.406002	RPL27A;RPS11
r2 part of lateral pontine nuclei	2/300	0.642536	0.897079	0	0	0.917867	0.406002	CSDE1;EEF2
r2 part of median raphe nucleus	2/300	0.642536	0.897079	0	0	0.917867	0.406002	MSN;TAGLN2
r2 part of principal trigeminal sensory nucleus	2/300	0.642536	0.897079	0	0	0.917867	0.406002	RPL30;ACTN1
r2 part of ventral lateral lemniscal nucleus	2/300	0.642536	0.897079	0	0	0.917867	0.406002	RPL30;CSDE1
r2 part of vestibular nucleus Y	2/300	0.642536	0.897079	0	0	0.917867	0.406002	RPS14;RPL30
r3 part of anteroventral cochlear nucleus	2/300	0.642536	0.897079	0	0	0.917867	0.406002	GDF15;RPL37A
r3 part of basointermediate reticular formation	2/300	0.642536	0.897079	0	0	0.917867	0.406002	MSN;RPL27
r3 part of cochlear sensory column	2/300	0.642536	0.897079	0	0	0.917867	0.406002	RPL37A;RPS11
r3 part of dorsal cochlear nucleus	2/300	0.642536	0.897079	0	0	0.917867	0.406002	RPL27A;RPS11
r3 part of spinal trigeminal sensory column, oral part	2/300	0.642536	0.897079	0	0	0.917867	0.406002	RPL30;ACTN1
r3 part of trigeminal sensory column	2/300	0.642536	0.897079	0	0	0.917867	0.406002	RPL30;ARPC2
r3 part of trigeminal transition zone	2/300	0.642536	0.897079	0	0	0.917867	0.406002	RPL30;GRN
r4 part of descending trigeminal sensory nucleus, oral part	2/300	0.642536	0.897079	0	0	0.917867	0.406002	RPL30;GRN
r4 part of dorsal parvicellular reticular formation	2/300	0.642536	0.897079	0	0	0.917867	0.406002	FCER1G;ARPC2
r4 part of lateral pontine nuclei	2/300	0.642536	0.897079	0	0	0.917867	0.406002	IL1RN;RPS8
r5 part of basolateral reticular formation	2/300	0.642536	0.897079	0	0	0.917867	0.406002	MMP14;SDC2
r5 part of dorsal parvicellular reticular formation	2/300	0.642536	0.897079	0	0	0.917867	0.406002	FCER1G;ARPC2
r5 part of the cochlear column	2/300	0.642536	0.897079	0	0	0.917867	0.406002	RPS16;SMAP2
r5 part of the oral Sp5 subnucleus	2/300	0.642536	0.897079	0	0	0.917867	0.406002	RPL30;RPL27A
r5 part of the trigeminal column	2/300	0.642536	0.897079	0	0	0.917867	0.406002	GRN;FCER1G
r6 basal plate	2/300	0.642536	0.897079	0	0	0.917867	0.406002	HNRNPU;GAPDH
r6 part of dorsal parvicellular reticular formation	2/300	0.642536	0.897079	0	0	0.917867	0.406002	MMP14;FCER1G
r6 part of posteroventral cochlear nucleus	2/300	0.642536	0.897079	0	0	0.917867	0.406002	LASP1;RPL37A
r7 part of spinal trigeminal nucleus, interpolar part	2/300	0.642536	0.897079	0	0	0.917867	0.406002	ARPC2;RPS3
r7 part of ventral gigangocellular reticular area	2/300	0.642536	0.897079	0	0	0.917867	0.406002	ARPC2;PSAP
r8 part of nucleus of Roller	2/300	0.642536	0.897079	0	0	0.917867	0.406002	RPL27;HSPG2
r8 part of parvocellular medial vestibular nucleus	2/300	0.642536	0.897079	0	0	0.917867	0.406002	RPL11;RPS21
r9 part of trigeminal transition zone	2/300	0.642536	0.897079	0	0	0.917867	0.406002	H2AFY;RPS21
r9 portion of ambiguous motor nucleus (postmigratory)	2/300	0.642536	0.897079	0	0	0.917867	0.406002	HSP90AA1;RPL31
r9 portion of the hypoglossal motor nucleus	2/300	0.642536	0.897079	0	0	0.917867	0.406002	RPL27;HLA-A
reticular complex	2/300	0.642536	0.897079	0	0	0.917867	0.406002	CDKN1A;MMP9
reticular formation of CoPD	2/300	0.642536	0.897079	0	0	0.917867	0.406002	ARPC2;TIMP1
reticular formation of JcPL	2/300	0.642536	0.897079	0	0	0.917867	0.406002	ACTN4;TIMP1
reticular nucleus	2/300	0.642536	0.897079	0	0	0.917867	0.406002	CDKN1A;ARPC2
rhombomere 2	2/300	0.642536	0.897079	0	0	0.917867	0.406002	RPS27A;GAPDH
rhombomere 5	2/300	0.642536	0.897079	0	0	0.917867	0.406002	HNRNPU;GAPDH
rostral interpeduncular nucleus	2/300	0.642536	0.897079	0	0	0.917867	0.406002	MTDH;MCL1
rostral paraventricular nucleus	2/300	0.642536	0.897079	0	0	0.917867	0.406002	ENO1;RHOA
rostral periolivary nucleus	2/300	0.642536	0.897079	0	0	0.917867	0.406002	SDC2;PPT1
rostromedial tegmental nucleus	2/300	0.642536	0.897079	0	0	0.917867	0.406002	MTDH;MCL1
septopallidal core nucleus	2/300	0.642536	0.897079	0	0	0.917867	0.406002	SLC20A1;FTH1
septostriatal part of the olfactory tuberculum	2/300	0.642536	0.897079	0	0	0.917867	0.406002	RPS8;EEF2
shell of VMH	2/300	0.642536	0.897079	0	0	0.917867	0.406002	ATP5G3;ATP5L
striatal amygdala	2/300	0.642536	0.897079	0	0	0.917867	0.406002	GDF15;S100A4
striohypothalamic nucleus	2/300	0.642536	0.897079	0	0	0.917867	0.406002	ENO1;SERF2
subbrachial nucleus, caudal part	2/300	0.642536	0.897079	0	0	0.917867	0.406002	RPL30;ARPC2
subbrachial nucleus, rostral part	2/300	0.642536	0.897079	0	0	0.917867	0.406002	RPL30;NRG4
subethmoid nucleus	2/300	0.642536	0.897079	0	0	0.917867	0.406002	RPS19;PABPC4
sublayer 6a of PCx	2/300	0.642536	0.897079	0	0	0.917867	0.406002	NRG4;MMP9
sublayer 6b of CCx	2/300	0.642536	0.897079	0	0	0.917867	0.406002	SDC2;HMGA1
sublayer 6b of PCx	2/300	0.642536	0.897079	0	0	0.917867	0.406002	ARPC2;MMP9
subpallial amygdala	2/300	0.642536	0.897079	0	0	0.917867	0.406002	SLC20A1;S100A4
superficial mantle of isBM	2/300	0.642536	0.897079	0	0	0.917867	0.406002	ARPC2;PPT1
superficial stratum of AOD	2/300	0.642536	0.897079	0	0	0.917867	0.406002	CD81;TAGLN2
superficial stratum of AOV	2/300	0.642536	0.897079	0	0	0.917867	0.406002	CD81;RPS8
superficial stratum of CA	2/300	0.642536	0.897079	0	0	0.917867	0.406002	SPP1;ND3
superficial stratum of CCx (cortical plate/marginal zone)	2/300	0.642536	0.897079	0	0	0.917867	0.406002	SDC2;DBI
superficial stratum of CoPL	2/300	0.642536	0.897079	0	0	0.917867	0.406002	SH3BGRL3;RPS12
superficial stratum of CoPV	2/300	0.642536	0.897079	0	0	0.917867	0.406002	RPL30;RPS12
superficial stratum of JcPL	2/300	0.642536	0.897079	0	0	0.917867	0.406002	RPL30;ARPC2
superficial stratum of Mam	2/300	0.642536	0.897079	0	0	0.917867	0.406002	CAP1;MTDH
superficial stratum of PO1	2/300	0.642536	0.897079	0	0	0.917867	0.406002	ENO1;CTSD
superficial stratum of PcPL	2/300	0.642536	0.897079	0	0	0.917867	0.406002	CDKN1A;SPP1
superficial stratum of PrS (cortical plate/marginal zone)	2/300	0.642536	0.897079	0	0	0.917867	0.406002	ARPC2;ZMPSTE24
superficial stratum of RtC	2/300	0.642536	0.897079	0	0	0.917867	0.406002	CDKN1A;ARPC2
superficial stratum of SeStr	2/300	0.642536	0.897079	0	0	0.917867	0.406002	RPS8;EEF2
superficial stratum of THyB-P	2/300	0.642536	0.897079	0	0	0.917867	0.406002	CAP1;TMED9
superficial stratum of VPrP	2/300	0.642536	0.897079	0	0	0.917867	0.406002	CD63;PRDX1
superficial stratum of m1AD	2/300	0.642536	0.897079	0	0	0.917867	0.406002	PABPC4;ACTN4
superficial stratum of m1AL	2/300	0.642536	0.897079	0	0	0.917867	0.406002	RPL30;NRG4
superficial stratum of r2BI	2/300	0.642536	0.897079	0	0	0.917867	0.406002	CSDE1;EEF2
superficial stratum of r2BL	2/300	0.642536	0.897079	0	0	0.917867	0.406002	RPL30;CSDE1
superficial stratum of r2BM	2/300	0.642536	0.897079	0	0	0.917867	0.406002	MTDH;MCL1
superficial stratum of r2Co	2/300	0.642536	0.897079	0	0	0.917867	0.406002	RPL27A;RPS11
superficial stratum of r2Tr	2/300	0.642536	0.897079	0	0	0.917867	0.406002	RPL30;ACTN1
superficial stratum of r3Co	2/300	0.642536	0.897079	0	0	0.917867	0.406002	GDF15;RPL37A
superficial stratum of r3Tr	2/300	0.642536	0.897079	0	0	0.917867	0.406002	RPL30;ACTN1
superficial stratum of r3Ve	2/300	0.642536	0.897079	0	0	0.917867	0.406002	HNRNPU;RPS21
superficial stratum of r4BI	2/300	0.642536	0.897079	0	0	0.917867	0.406002	IL1RN;RPS8
superficial stratum of r4Tr	2/300	0.642536	0.897079	0	0	0.917867	0.406002	RPL30;GRN
superficial stratum of r5BI	2/300	0.642536	0.897079	0	0	0.917867	0.406002	MYL6;ND3
superficial stratum of r5BL	2/300	0.642536	0.897079	0	0	0.917867	0.406002	APLP2;PPT1
superficial stratum of r5BM	2/300	0.642536	0.897079	0	0	0.917867	0.406002	MYL6;OAZ1
superficial stratum of r6Co	2/300	0.642536	0.897079	0	0	0.917867	0.406002	LASP1;RPL37A
superficial stratum of r9Lim	2/300	0.642536	0.897079	0	0	0.917867	0.406002	HSP90AA1;RPL31
temporal muscle trigeminal motor cell group	2/300	0.642536	0.897079	0	0	0.917867	0.406002	RPL30;TAGLN2
terete nucleus	2/300	0.642536	0.897079	0	0	0.917867	0.406002	CAP1;TMED9
ventral endopiriform nucleus	2/300	0.642536	0.897079	0	0	0.917867	0.406002	CD63;NRG4
ventral part of PHyB	2/300	0.642536	0.897079	0	0	0.917867	0.406002	ATP5L;MTDH
ventral part of PcP	2/300	0.642536	0.897079	0	0	0.917867	0.406002	ACTN4;YBX1
ventral posterior parvicellular nucleus	2/300	0.642536	0.897079	0	0	0.917867	0.406002	RPS18;S100A4
ventral posteromedial nucleus	2/300	0.642536	0.897079	0	0	0.917867	0.406002	PABPC4;RPS12
ventral tuberomammillary nucleus, intermediate part (histaminergic)	2/300	0.642536	0.897079	0	0	0.917867	0.406002	HLA-A;ATP5G3
ventrolateral part of alar p1	2/300	0.642536	0.897079	0	0	0.917867	0.406002	S100A6;ACTN4
ventromedial nucleus	2/300	0.642536	0.897079	0	0	0.917867	0.406002	RPS19;PABPC4
zonal layer of SC	2/300	0.642536	0.897079	0	0	0.917867	0.406002	ND3;RPS12
Medial preoptic nucleus	3/454	0.642791	0.897079	0	0	0.908966	0.401705	ENO1;SERF2;ATP5L
Central amygdalar nucleus, capsular part	3/462	0.654482	0.897079	0	0	0.892755	0.378449	NRG4;PRDX1;S100A4
Facial motor nucleus	2/347	0.719725	0.897079	0	0	0.790919	0.260122	MMP14;APLP2
Field CA3	2/357	0.734231	0.897079	0	0	0.768246	0.237335	CDKN1A;SPP1
Parabigeminal nucleus	3/524	0.735844	0.897079	0	0	0.784002	0.240482	RPL30;CANX;EIF4G2
Peripeduncular nucleus	3/543	0.75756	0.897079	0	0	0.755673	0.209815	CDKN1A;ARPC2;NRG4
intermediate stratum of DG	3/583	0.7986	0.897079	0	0	0.702101	0.157899	RAB31;FTH1;SPP1
mantle zone of DG	3/593	0.807914	0.897079	0	0	0.689842	0.147143	SLC20A1;SPP1;ND3
Claustrum	2/427	0.818915	0.897079	0	0	0.639408	0.127737	NRG4;HMGA1
Field CA2	2/452	0.842795	0.897079	0	0	0.603108	0.103151	SLC20A1;SPP1
Parafascicular nucleus	2/457	0.847217	0.897079	0	0	0.596327	0.0988702	RPS18;RPS6
Field CA2, stratum oriens	2/467	0.855726	0.897079	0	0	0.583202	0.0908661	SPP1;TIMP1
Induseum griseum	2/489	0.872952	0.897079	0	0	0.556224	0.075577	RPL35A;RPS24
Olivary pretectal nucleus	2/500	0.880841	0.897079	0	0	0.543629	0.0689745	ARPC2;LCP1
Agranular insular area, dorsal part, layer 6a	1/300	0.889136	0.897079	0	0	0.454199	0.0533706	HMGA1
Agranular insular area, ventral part, layer 2/3	1/300	0.889136	0.897079	0	0	0.454199	0.0533706	HMGA1
Anterior cingulate area, ventral part, 6a	1/300	0.889136	0.897079	0	0	0.454199	0.0533706	LCP1
Anterior cingulate area, ventral part, 6b	1/300	0.889136	0.897079	0	0	0.454199	0.0533706	LCP1
Anterior olfactory nucleus, posteroventral part	1/300	0.889136	0.897079	0	0	0.454199	0.0533706	RPL27
Anterodorsal preoptic nucleus	1/300	0.889136	0.897079	0	0	0.454199	0.0533706	RPL27
Anterolateral visual area, layer 2/3	1/300	0.889136	0.897079	0	0	0.454199	0.0533706	CTSD
Anterolateral visual area, layer 5	1/300	0.889136	0.897079	0	0	0.454199	0.0533706	PABPC4
Anterolateral visual area, layer 6a	1/300	0.889136	0.897079	0	0	0.454199	0.0533706	ARPC2
Anteromedial nucleus, ventral part	1/300	0.889136	0.897079	0	0	0.454199	0.0533706	PABPC4
Arcuate hypothalamic nucleus	1/300	0.889136	0.897079	0	0	0.454199	0.0533706	ATP5L
Barrington's nucleus	1/300	0.889136	0.897079	0	0	0.454199	0.0533706	HLA-A
Basolateral amygdalar nucleus, anterior part	1/300	0.889136	0.897079	0	0	0.454199	0.0533706	PRDX1
Basolateral amygdalar nucleus, posterior part	1/300	0.889136	0.897079	0	0	0.454199	0.0533706	PRDX1
Bed nuclei of the stria terminalis, anterior division, anterolateral area	1/300	0.889136	0.897079	0	0	0.454199	0.0533706	FTH1
Bed nuclei of the stria terminalis, anterior division, dorsomedial nucleus	1/300	0.889136	0.897079	0	0	0.454199	0.0533706	ENO1
Bed nuclei of the stria terminalis, anterior division, fusiform nucleus	1/300	0.889136	0.897079	0	0	0.454199	0.0533706	FTH1
Bed nuclei of the stria terminalis, anterior division, juxtacapsular nucleus	1/300	0.889136	0.897079	0	0	0.454199	0.0533706	FTH1
Bed nuclei of the stria terminalis, anterior division, magnocellular nucleus	1/300	0.889136	0.897079	0	0	0.454199	0.0533706	ENO1
Bed nuclei of the stria terminalis, anterior division, rhomboid nucleus	1/300	0.889136	0.897079	0	0	0.454199	0.0533706	FTH1
Bed nuclei of the stria terminalis, posterior division	1/300	0.889136	0.897079	0	0	0.454199	0.0533706	SLC20A1
Bed nuclei of the stria terminalis, posterior division, principal nucleus	1/300	0.889136	0.897079	0	0	0.454199	0.0533706	SLC20A1
Bed nuclei of the stria terminalis, posterior division, strial extension	1/300	0.889136	0.897079	0	0	0.454199	0.0533706	TAGLN2
Brain stem	1/300	0.889136	0.897079	0	0	0.454199	0.0533706	ACTN1
Central amygdalar nucleus, medial part	1/300	0.889136	0.897079	0	0	0.454199	0.0533706	NRG4
CoPV part of the periaqueductal gray	1/300	0.889136	0.897079	0	0	0.454199	0.0533706	RPL37
Cortical amygdalar area	1/300	0.889136	0.897079	0	0	0.454199	0.0533706	PRDX1
Cortical amygdalar area, anterior part, layer 2	1/300	0.889136	0.897079	0	0	0.454199	0.0533706	SLC20A1
Cortical amygdalar area, posterior part	1/300	0.889136	0.897079	0	0	0.454199	0.0533706	PRDX1
Cortical amygdalar area, posterior part, lateral zone	1/300	0.889136	0.897079	0	0	0.454199	0.0533706	PRDX1
Cortical amygdalar area, posterior part, lateral zone, layer 3	1/300	0.889136	0.897079	0	0	0.454199	0.0533706	PRDX1
Cortical amygdalar area, posterior part, medial zone	1/300	0.889136	0.897079	0	0	0.454199	0.0533706	PRDX1
Cortical amygdalar area, posterior part, medial zone, layer 1	1/300	0.889136	0.897079	0	0	0.454199	0.0533706	PRDX1
Cortical amygdalar area, posterior part, medial zone, layer 3	1/300	0.889136	0.897079	0	0	0.454199	0.0533706	PRDX1
Cuneate nucleus	1/300	0.889136	0.897079	0	0	0.454199	0.0533706	RPS21
Dorsal column nuclei	1/300	0.889136	0.897079	0	0	0.454199	0.0533706	RPS21
Ectorhinal area/Layer 6a	1/300	0.889136	0.897079	0	0	0.454199	0.0533706	PABPC4
Endopiriform nucleus	1/300	0.889136	0.897079	0	0	0.454199	0.0533706	NRG4
Endopiriform nucleus, dorsal part	1/300	0.889136	0.897079	0	0	0.454199	0.0533706	NRG4
Entorhinal area, lateral part	1/300	0.889136	0.897079	0	0	0.454199	0.0533706	RAB31
Entorhinal area, lateral part, layer 3	1/300	0.889136	0.897079	0	0	0.454199	0.0533706	RAB31
Entorhinal area, lateral part, layer 5	1/300	0.889136	0.897079	0	0	0.454199	0.0533706	RAB31
Entorhinal area, medial part, ventral zone	1/300	0.889136	0.897079	0	0	0.454199	0.0533706	PRDX1
Entorhinal area, medial part, ventral zone, layer 2	1/300	0.889136	0.897079	0	0	0.454199	0.0533706	PRDX1
Entorhinal area, medial part, ventral zone, layer 3	1/300	0.889136	0.897079	0	0	0.454199	0.0533706	RPS14
Field CA2, stratum pyramidale	1/300	0.889136	0.897079	0	0	0.454199	0.0533706	SPP1
Fields of Forel	1/300	0.889136	0.897079	0	0	0.454199	0.0533706	TAGLN2
Globus pallidus, external segment	1/300	0.889136	0.897079	0	0	0.454199	0.0533706	NRG4
Globus pallidus, internal segment	1/300	0.889136	0.897079	0	0	0.454199	0.0533706	RPL5
Gustatory areas	1/300	0.889136	0.897079	0	0	0.454199	0.0533706	HMGA1
Gustatory areas, layer 4	1/300	0.889136	0.897079	0	0	0.454199	0.0533706	TAGLN2
Gustatory areas, layer 5	1/300	0.889136	0.897079	0	0	0.454199	0.0533706	HMGA1
Gustatory areas, layer 6a	1/300	0.889136	0.897079	0	0	0.454199	0.0533706	HMGA1
Hypoglossal nucleus	1/300	0.889136	0.897079	0	0	0.454199	0.0533706	HLA-A
Hypothalamic medial zone	1/300	0.889136	0.897079	0	0	0.454199	0.0533706	ATP5L
Inferior salivatory nucleus	1/300	0.889136	0.897079	0	0	0.454199	0.0533706	FCER1G
Infralimbic area	1/300	0.889136	0.897079	0	0	0.454199	0.0533706	MSN
Interanteromedial nucleus of the thalamus	1/300	0.889136	0.897079	0	0	0.454199	0.0533706	CFL1
Interbrain	1/300	0.889136	0.897079	0	0	0.454199	0.0533706	CDKN1A
Intermediate reticular nucleus	1/300	0.889136	0.897079	0	0	0.454199	0.0533706	H2AFY
Interstitial nucleus of Cajal	1/300	0.889136	0.897079	0	0	0.454199	0.0533706	RPL37
Intralaminar nuclei of the dorsal thalamus	1/300	0.889136	0.897079	0	0	0.454199	0.0533706	RPS18
Lateral preoptic area	1/300	0.889136	0.897079	0	0	0.454199	0.0533706	ARPC2
Lateral septal nucleus, ventral part	1/300	0.889136	0.897079	0	0	0.454199	0.0533706	SLC20A1
Lateral terminal nucleus of the accessory optic tract	1/300	0.889136	0.897079	0	0	0.454199	0.0533706	RPL30
Lateral vestibular nucleus	1/300	0.889136	0.897079	0	0	0.454199	0.0533706	HNRNPU
Lateral visual area, layer 6b	1/300	0.889136	0.897079	0	0	0.454199	0.0533706	PABPC4
Lingula (I)	1/300	0.889136	0.897079	0	0	0.454199	0.0533706	PHLDA1
Lingula (I), molecular layer	1/300	0.889136	0.897079	0	0	0.454199	0.0533706	PHLDA1
Lobule II	1/300	0.889136	0.897079	0	0	0.454199	0.0533706	TUBA1B
Lobule II, molecular layer	1/300	0.889136	0.897079	0	0	0.454199	0.0533706	TUBA1B
Major island of Calleja	1/300	0.889136	0.897079	0	0	0.454199	0.0533706	RPL27
Mammillary body	1/300	0.889136	0.897079	0	0	0.454199	0.0533706	MTDH
Medial amygdalar nucleus, posterodorsal part, sublayer c	1/300	0.889136	0.897079	0	0	0.454199	0.0533706	SERF2
Medial amygdalar nucleus, posteroventral part	1/300	0.889136	0.897079	0	0	0.454199	0.0533706	RPL30
Medial geniculate complex, medial part	1/300	0.889136	0.897079	0	0	0.454199	0.0533706	RPL30
Medial habenula	1/300	0.889136	0.897079	0	0	0.454199	0.0533706	SLC20A1
Medial preoptic nucleus, medial part	1/300	0.889136	0.897079	0	0	0.454199	0.0533706	ENO1
Medial septal nucleus	1/300	0.889136	0.897079	0	0	0.454199	0.0533706	FTH1
Medial vestibular nucleus	1/300	0.889136	0.897079	0	0	0.454199	0.0533706	RGS16
Midbrain raphe nuclei	1/300	0.889136	0.897079	0	0	0.454199	0.0533706	CCL20
Midbrain reticular nucleus	1/300	0.889136	0.897079	0	0	0.454199	0.0533706	S100A6
Midbrain trigeminal nucleus	1/300	0.889136	0.897079	0	0	0.454199	0.0533706	TAGLN2
Motor nucleus of trigeminal	1/300	0.889136	0.897079	0	0	0.454199	0.0533706	RPL30
Nucleus accumbens	1/300	0.889136	0.897079	0	0	0.454199	0.0533706	FTH1
Nucleus of Darkschewitsch	1/300	0.889136	0.897079	0	0	0.454199	0.0533706	RPL37
Nucleus of Roller	1/300	0.889136	0.897079	0	0	0.454199	0.0533706	RPL27
Nucleus of the lateral lemniscus, horizontal part	1/300	0.889136	0.897079	0	0	0.454199	0.0533706	RPL30
Nucleus of the optic tract	1/300	0.889136	0.897079	0	0	0.454199	0.0533706	TIMP1
Nucleus of the solitary tract	1/300	0.889136	0.897079	0	0	0.454199	0.0533706	PHLDA1
Nucleus of the solitary tract, lateral part	1/300	0.889136	0.897079	0	0	0.454199	0.0533706	RPS21
Nucleus of the solitary tract, medial part	1/300	0.889136	0.897079	0	0	0.454199	0.0533706	PHLDA1
Nucleus of the trapezoid body	1/300	0.889136	0.897079	0	0	0.454199	0.0533706	MYL6
Nucleus sagulum	1/300	0.889136	0.897079	0	0	0.454199	0.0533706	RPL30
Nucleus x	1/300	0.889136	0.897079	0	0	0.454199	0.0533706	RPL30
Nucleus y	1/300	0.889136	0.897079	0	0	0.454199	0.0533706	RPL30
Orbital area, medial part	1/300	0.889136	0.897079	0	0	0.454199	0.0533706	RPS24
Orbital area, medial part, layer 2	1/300	0.889136	0.897079	0	0	0.454199	0.0533706	RPS24
Orbital area, medial part, layer 5	1/300	0.889136	0.897079	0	0	0.454199	0.0533706	RPS24
Orbital area, ventrolateral part, layer 5	1/300	0.889136	0.897079	0	0	0.454199	0.0533706	RPS24
Parabrachial nucleus, lateral division, central lateral part	1/300	0.889136	0.897079	0	0	0.454199	0.0533706	TAGLN2
Parabrachial nucleus, lateral division, external lateral part	1/300	0.889136	0.897079	0	0	0.454199	0.0533706	RPL30
Parabrachial nucleus, medial division, external medial part	1/300	0.889136	0.897079	0	0	0.454199	0.0533706	RPL30
Paragigantocellular reticular nucleus, dorsal part	1/300	0.889136	0.897079	0	0	0.454199	0.0533706	RPL27
Parastrial nucleus	1/300	0.889136	0.897079	0	0	0.454199	0.0533706	ENO1
Paraventricular hypothalamic nucleus, magnocellular division, posterior magnocellular part	1/300	0.889136	0.897079	0	0	0.454199	0.0533706	CFL1
Paraventricular hypothalamic nucleus, magnocellular division, posterior magnocellular part, lateral zone	1/300	0.889136	0.897079	0	0	0.454199	0.0533706	CFL1
Paraventricular nucleus of the thalamus	1/300	0.889136	0.897079	0	0	0.454199	0.0533706	ARPC2
Pedunculopontine nucleus	1/300	0.889136	0.897079	0	0	0.454199	0.0533706	TYROBP
Periaqueductal gray	1/300	0.889136	0.897079	0	0	0.454199	0.0533706	RPL37
Pons, behavioral state related	1/300	0.889136	0.897079	0	0	0.454199	0.0533706	ITGB2
Pons, motor related	1/300	0.889136	0.897079	0	0	0.454199	0.0533706	MMP14
Pontine central gray	1/300	0.889136	0.897079	0	0	0.454199	0.0533706	RGS16
Pontine reticular nucleus	1/300	0.889136	0.897079	0	0	0.454199	0.0533706	DUSP6
Posterior pretectal nucleus	1/300	0.889136	0.897079	0	0	0.454199	0.0533706	LCP1
Posterolateral visual area, layer 4	1/300	0.889136	0.897079	0	0	0.454199	0.0533706	NRG4
Posterolateral visual area, layer 6b	1/300	0.889136	0.897079	0	0	0.454199	0.0533706	ARPC2
Prelimbic area, layer 6a	1/300	0.889136	0.897079	0	0	0.454199	0.0533706	DBI
Presubiculum, layer 3	1/300	0.889136	0.897079	0	0	0.454199	0.0533706	ZMPSTE24
Primary somatosensory area, mouth, layer 6a	1/300	0.889136	0.897079	0	0	0.454199	0.0533706	PABPC4
Primary somatosensory area, mouth, layer 6b	1/300	0.889136	0.897079	0	0	0.454199	0.0533706	LAPTM5
Primary somatosensory area, trunk, layer 6a	1/300	0.889136	0.897079	0	0	0.454199	0.0533706	MMP9
Primary somatosensory area, trunk, layer 6b	1/300	0.889136	0.897079	0	0	0.454199	0.0533706	MMP9
Primary somatosensory area, unassigned, layer 6a	1/300	0.889136	0.897079	0	0	0.454199	0.0533706	NRG4
Primary somatosensory area, unassigned, layer 6b	1/300	0.889136	0.897079	0	0	0.454199	0.0533706	NRG4
Primary somatosensory area, upper limb, layer 6a	1/300	0.889136	0.897079	0	0	0.454199	0.0533706	NRG4
Red nucleus	1/300	0.889136	0.897079	0	0	0.454199	0.0533706	MSN
Retrochiasmatic area	1/300	0.889136	0.897079	0	0	0.454199	0.0533706	ATP5L
Spinal nucleus of the trigeminal, oral part	1/300	0.889136	0.897079	0	0	0.454199	0.0533706	RPL30
Spinal nucleus of the trigeminal, oral part, middle dorsomedial part, ventral zone	1/300	0.889136	0.897079	0	0	0.454199	0.0533706	RPL30
Subiculum, ventral part	1/300	0.889136	0.897079	0	0	0.454199	0.0533706	TIMP1
Subiculum, ventral part, molecular layer	1/300	0.889136	0.897079	0	0	0.454199	0.0533706	RAB31
Subiculum, ventral part, pyramidal layer	1/300	0.889136	0.897079	0	0	0.454199	0.0533706	TIMP1
Subiculum, ventral part, stratum radiatum	1/300	0.889136	0.897079	0	0	0.454199	0.0533706	RAB31
Sublaterodorsal nucleus	1/300	0.889136	0.897079	0	0	0.454199	0.0533706	TAGLN2
Submedial nucleus of the thalamus	1/300	0.889136	0.897079	0	0	0.454199	0.0533706	DBI
Subparaventricular zone	1/300	0.889136	0.897079	0	0	0.454199	0.0533706	RHOA
Subthalamic nucleus	1/300	0.889136	0.897079	0	0	0.454199	0.0533706	FTH1
Superior central nucleus raphe	1/300	0.889136	0.897079	0	0	0.454199	0.0533706	TAGLN2
Superior central nucleus raphe, lateral part	1/300	0.889136	0.897079	0	0	0.454199	0.0533706	TAGLN2
Superior colliculus, motor related, deep white layer	1/300	0.889136	0.897079	0	0	0.454199	0.0533706	ARPC2
Supplemental somatosensory area, layer 6a	1/300	0.889136	0.897079	0	0	0.454199	0.0533706	NRG4
Supplemental somatosensory area, layer 6b	1/300	0.889136	0.897079	0	0	0.454199	0.0533706	HMGA1
Supramammillary nucleus	1/300	0.889136	0.897079	0	0	0.454199	0.0533706	MTDH
Supramammillary nucleus, medial part	1/300	0.889136	0.897079	0	0	0.454199	0.0533706	MTDH
Supratrigeminal nucleus	1/300	0.889136	0.897079	0	0	0.454199	0.0533706	TAGLN2
Taenia tecta, dorsal part	1/300	0.889136	0.897079	0	0	0.454199	0.0533706	RGS16
Taenia tecta, dorsal part, layer 1	1/300	0.889136	0.897079	0	0	0.454199	0.0533706	RGS16
Taenia tecta, dorsal part, layer 2	1/300	0.889136	0.897079	0	0	0.454199	0.0533706	RGS16
Taenia tecta, dorsal part, layer 3	1/300	0.889136	0.897079	0	0	0.454199	0.0533706	RGS16
Taenia tecta, ventral part, layer 1	1/300	0.889136	0.897079	0	0	0.454199	0.0533706	RPS8
Taenia tecta, ventral part, layer 3	1/300	0.889136	0.897079	0	0	0.454199	0.0533706	RPL27
Tegmental reticular nucleus	1/300	0.889136	0.897079	0	0	0.454199	0.0533706	MSN
Temporal association areas, layer 5	1/300	0.889136	0.897079	0	0	0.454199	0.0533706	PABPC4
Temporal association areas, layer 6a	1/300	0.889136	0.897079	0	0	0.454199	0.0533706	PABPC4
Ventral posterior complex of the thalamus	1/300	0.889136	0.897079	0	0	0.454199	0.0533706	RPS12
Ventral posterolateral nucleus of the thalamus, parvicellular part	1/300	0.889136	0.897079	0	0	0.454199	0.0533706	TAGLN2
Ventromedial hypothalamic nucleus, anterior part	1/300	0.889136	0.897079	0	0	0.454199	0.0533706	RHOA
Ventromedial hypothalamic nucleus, ventrolateral part	1/300	0.889136	0.897079	0	0	0.454199	0.0533706	ATP5L
Zona incerta	1/300	0.889136	0.897079	0	0	0.454199	0.0533706	S100A6
abducens motor nucleus	1/300	0.889136	0.897079	0	0	0.454199	0.0533706	LAPTM5
accessory entopeduncular nucleus (post-migratory)	1/300	0.889136	0.897079	0	0	0.454199	0.0533706	CFL1
accumbens nucleus, shell domain	1/300	0.889136	0.897079	0	0	0.454199	0.0533706	PRDX1
alar plate of p1	1/300	0.889136	0.897079	0	0	0.454199	0.0533706	ACTN4
alar plate of p3 (alar prethalamus)	1/300	0.889136	0.897079	0	0	0.454199	0.0533706	CDKN1A
anterior digastric muscle trigeminal motor cell group	1/300	0.889136	0.897079	0	0	0.454199	0.0533706	RPL30
anterior paraventricular nucleus of thalamus	1/300	0.889136	0.897079	0	0	0.454199	0.0533706	ARPC2
anterior pretectal nucleus, ventral superficial part	1/300	0.889136	0.897079	0	0	0.454199	0.0533706	NRG4
anteroventral periventricular preoptic nucleus	1/300	0.889136	0.897079	0	0	0.454199	0.0533706	ENO1
basal peduncular hypothalamus	1/300	0.889136	0.897079	0	0	0.454199	0.0533706	MTDH
basal plate of p1	1/300	0.889136	0.897079	0	0	0.454199	0.0533706	DUSP6
basal plate of p2	1/300	0.889136	0.897079	0	0	0.454199	0.0533706	BTG1
basomedial amygdaloid nucleus, posterior part	1/300	0.889136	0.897079	0	0	0.454199	0.0533706	PRDX1
bed nucleus of the stria terminalis, laterocentral division	1/300	0.889136	0.897079	0	0	0.454199	0.0533706	SLC20A1
central part of MPO	1/300	0.889136	0.897079	0	0	0.454199	0.0533706	ENO1
central part of VMH	1/300	0.889136	0.897079	0	0	0.454199	0.0533706	ATP5L
dorsal endopiriform nucleus	1/300	0.889136	0.897079	0	0	0.454199	0.0533706	HSPG2
dorsal entopeduncular nucleus	1/300	0.889136	0.897079	0	0	0.454199	0.0533706	FTH1
dorsal juxtacommissural pretectal nucleus	1/300	0.889136	0.897079	0	0	0.454199	0.0533706	HNRNPU
dorsal nucleus of the lateral lemniscus	1/300	0.889136	0.897079	0	0	0.454199	0.0533706	RPL30
dorsal part of CoP	1/300	0.889136	0.897079	0	0	0.454199	0.0533706	ARPC2
dorsal part of JcP	1/300	0.889136	0.897079	0	0	0.454199	0.0533706	HNRNPU
dorsal part of PHyB	1/300	0.889136	0.897079	0	0	0.454199	0.0533706	ARPC2
dorsal part of alar p2	1/300	0.889136	0.897079	0	0	0.454199	0.0533706	SLC20A1
dorsal part of m1A	1/300	0.889136	0.897079	0	0	0.454199	0.0533706	PABPC4
dorsal part of m2A	1/300	0.889136	0.897079	0	0	0.454199	0.0533706	PABPC4
dorsal preisthmic part of periaqueductal gray	1/300	0.889136	0.897079	0	0	0.454199	0.0533706	PABPC4
dorsal septopreoptic nucleus	1/300	0.889136	0.897079	0	0	0.454199	0.0533706	ENO1
dorsolateral SC part of the periaqueductal gray	1/300	0.889136	0.897079	0	0	0.454199	0.0533706	ACTN4
dorsolateral isthmic part of the dorsal raphe nucleus	1/300	0.889136	0.897079	0	0	0.454199	0.0533706	HLA-A
dorsomedial preoptic area, intermediate part	1/300	0.889136	0.897079	0	0	0.454199	0.0533706	ENO1
external globus pallidum	1/300	0.889136	0.897079	0	0	0.454199	0.0533706	CDKN1A
habenula (old epithalamus)	1/300	0.889136	0.897079	0	0	0.454199	0.0533706	SLC20A1
intermediate part of THyB	1/300	0.889136	0.897079	0	0	0.454199	0.0533706	ATP5L
intermediate part of isB	1/300	0.889136	0.897079	0	0	0.454199	0.0533706	DUSP6
intermediate part of r1B	1/300	0.889136	0.897079	0	0	0.454199	0.0533706	DUSP6
intermediate part of r2B	1/300	0.889136	0.897079	0	0	0.454199	0.0533706	RPL27
intermediate part of r3B	1/300	0.889136	0.897079	0	0	0.454199	0.0533706	MSN
intermediate part of r6B	1/300	0.889136	0.897079	0	0	0.454199	0.0533706	LAPTM5
intermediate part of the arcuate nucleus	1/300	0.889136	0.897079	0	0	0.454199	0.0533706	ATP5L
intermediate periretromammillary nucleus	1/300	0.889136	0.897079	0	0	0.454199	0.0533706	ARPC2
intermediate pretectal nucleus	1/300	0.889136	0.897079	0	0	0.454199	0.0533706	LCP1
intermediate stratum of 5BL	1/300	0.889136	0.897079	0	0	0.454199	0.0533706	MMP14
intermediate stratum of AStr	1/300	0.889136	0.897079	0	0	0.454199	0.0533706	S100A4
intermediate stratum of CoPL	1/300	0.889136	0.897079	0	0	0.454199	0.0533706	ARPC2
intermediate stratum of DgSe	1/300	0.889136	0.897079	0	0	0.454199	0.0533706	RPL27
intermediate stratum of Hb	1/300	0.889136	0.897079	0	0	0.454199	0.0533706	RPS19
intermediate stratum of Ist	1/300	0.889136	0.897079	0	0	0.454199	0.0533706	RPL30
intermediate stratum of JcPV	1/300	0.889136	0.897079	0	0	0.454199	0.0533706	ACTN4
intermediate stratum of LAP	1/300	0.889136	0.897079	0	0	0.454199	0.0533706	PRDX1
intermediate stratum of PHyB-D	1/300	0.889136	0.897079	0	0	0.454199	0.0533706	CFL1
intermediate stratum of PO2	1/300	0.889136	0.897079	0	0	0.454199	0.0533706	ARPC2
intermediate stratum of PPaA	1/300	0.889136	0.897079	0	0	0.454199	0.0533706	ACTN4
intermediate stratum of PThE	1/300	0.889136	0.897079	0	0	0.454199	0.0533706	ARPC2
intermediate stratum of PalSe	1/300	0.889136	0.897079	0	0	0.454199	0.0533706	TAGLN2
intermediate stratum of RMa	1/300	0.889136	0.897079	0	0	0.454199	0.0533706	TMED9
intermediate stratum of RtC	1/300	0.889136	0.897079	0	0	0.454199	0.0533706	CDKN1A
intermediate stratum of SeDg	1/300	0.889136	0.897079	0	0	0.454199	0.0533706	FTH1
intermediate stratum of SeStr	1/300	0.889136	0.897079	0	0	0.454199	0.0533706	PRDX1
intermediate stratum of Str	1/300	0.889136	0.897079	0	0	0.454199	0.0533706	SLC20A1
intermediate stratum of THyB-I	1/300	0.889136	0.897079	0	0	0.454199	0.0533706	ATP5L
intermediate stratum of THyB-P	1/300	0.889136	0.897079	0	0	0.454199	0.0533706	HLA-A
intermediate stratum of VPrP	1/300	0.889136	0.897079	0	0	0.454199	0.0533706	NRG4
intermediate stratum of VTTh	1/300	0.889136	0.897079	0	0	0.454199	0.0533706	S100A6
intermediate stratum of ZIC	1/300	0.889136	0.897079	0	0	0.454199	0.0533706	CDKN1A
intermediate stratum of m2B	1/300	0.889136	0.897079	0	0	0.454199	0.0533706	S100A6
intermediate stratum of p2Lim	1/300	0.889136	0.897079	0	0	0.454199	0.0533706	BTG1
intermediate stratum of r10BI	1/300	0.889136	0.897079	0	0	0.454199	0.0533706	H2AFY
intermediate stratum of r10BM	1/300	0.889136	0.897079	0	0	0.454199	0.0533706	CALR
intermediate stratum of r10Tr	1/300	0.889136	0.897079	0	0	0.454199	0.0533706	H2AFY
intermediate stratum of r1BL	1/300	0.889136	0.897079	0	0	0.454199	0.0533706	DUSP6
intermediate stratum of r1Tr	1/300	0.889136	0.897079	0	0	0.454199	0.0533706	TAGLN2
intermediate stratum of r2Lim	1/300	0.889136	0.897079	0	0	0.454199	0.0533706	FCER1G
intermediate stratum of r2Tr	1/300	0.889136	0.897079	0	0	0.454199	0.0533706	RPL30
intermediate stratum of r3BL	1/300	0.889136	0.897079	0	0	0.454199	0.0533706	DUSP6
intermediate stratum of r3BM	1/300	0.889136	0.897079	0	0	0.454199	0.0533706	MSN
intermediate stratum of r3Lim	1/300	0.889136	0.897079	0	0	0.454199	0.0533706	FCER1G
intermediate stratum of r3Ve	1/300	0.889136	0.897079	0	0	0.454199	0.0533706	FCER1G
intermediate stratum of r4BI	1/300	0.889136	0.897079	0	0	0.454199	0.0533706	RPL27
intermediate stratum of r4BM	1/300	0.889136	0.897079	0	0	0.454199	0.0533706	MMP14
intermediate stratum of r4Lim	1/300	0.889136	0.897079	0	0	0.454199	0.0533706	FCER1G
intermediate stratum of r5BI	1/300	0.889136	0.897079	0	0	0.454199	0.0533706	MMP14
intermediate stratum of r5Lim	1/300	0.889136	0.897079	0	0	0.454199	0.0533706	MMP14
intermediate stratum of r6BI	1/300	0.889136	0.897079	0	0	0.454199	0.0533706	LAPTM5
intermediate stratum of r6BL	1/300	0.889136	0.897079	0	0	0.454199	0.0533706	MMP14
intermediate stratum of r6BM	1/300	0.889136	0.897079	0	0	0.454199	0.0533706	B2M
intermediate stratum of r6Lim	1/300	0.889136	0.897079	0	0	0.454199	0.0533706	MMP14
intermediate stratum of r7BI	1/300	0.889136	0.897079	0	0	0.454199	0.0533706	RPL37
intermediate stratum of r7BM	1/300	0.889136	0.897079	0	0	0.454199	0.0533706	RPL37
intermediate stratum of r8Tr	1/300	0.889136	0.897079	0	0	0.454199	0.0533706	H2AFY
island of Calleja major	1/300	0.889136	0.897079	0	0	0.454199	0.0533706	FTH1
isthmic liminal part of the periaqueductal gray	1/300	0.889136	0.897079	0	0	0.454199	0.0533706	TAGLN2
isthmic part of mesencephalic trigeminal nucleus	1/300	0.889136	0.897079	0	0	0.454199	0.0533706	TAGLN2
isthmic roof plate	1/300	0.889136	0.897079	0	0	0.454199	0.0533706	NRG4
lambdoid septal zone	1/300	0.889136	0.897079	0	0	0.454199	0.0533706	TAGLN2
lateral IC periaqueductal gray	1/300	0.889136	0.897079	0	0	0.454199	0.0533706	ACTN4
lateral amygdaloid nucleus	1/300	0.889136	0.897079	0	0	0.454199	0.0533706	ARPC2
lateral parabrachial nucleus	1/300	0.889136	0.897079	0	0	0.454199	0.0533706	RPL30
lateral part of PcP	1/300	0.889136	0.897079	0	0	0.454199	0.0533706	ARPC2
lateral part of preisthmic periaqueductal gray	1/300	0.889136	0.897079	0	0	0.454199	0.0533706	ACTN4
lateral part of r1B	1/300	0.889136	0.897079	0	0	0.454199	0.0533706	DUSP6
lateral part of r2B	1/300	0.889136	0.897079	0	0	0.454199	0.0533706	DUSP6
lateral part of r3B	1/300	0.889136	0.897079	0	0	0.454199	0.0533706	DUSP6
lateral part of the isB	1/300	0.889136	0.897079	0	0	0.454199	0.0533706	ARPC2
lateral periretromammillary nucleus	1/300	0.889136	0.897079	0	0	0.454199	0.0533706	MTDH
lateral preoptic nucleus, PO2 part	1/300	0.889136	0.897079	0	0	0.454199	0.0533706	ARPC2
lateral septal nucleus, intermediate part, periventricular	1/300	0.889136	0.897079	0	0	0.454199	0.0533706	SLC20A1
lateral septal nucleus, intermedio-intermediate part	1/300	0.889136	0.897079	0	0	0.454199	0.0533706	TAGLN2
lateral septal nucleus, intermedio-ventral part	1/300	0.889136	0.897079	0	0	0.454199	0.0533706	RPL27
lateral superior olive	1/300	0.889136	0.897079	0	0	0.454199	0.0533706	APLP2
layer 1 of RSC	1/300	0.889136	0.897079	0	0	0.454199	0.0533706	ZMPSTE24
layer 2 of LOT	1/300	0.889136	0.897079	0	0	0.454199	0.0533706	RPL30
layer 2 of PRh-Ect	1/300	0.889136	0.897079	0	0	0.454199	0.0533706	PABPC4
layer 2 of PaS	1/300	0.889136	0.897079	0	0	0.454199	0.0533706	ZMPSTE24
layer 3 of LPrP cortex	1/300	0.889136	0.897079	0	0	0.454199	0.0533706	PRDX1
layer 3 of PaS	1/300	0.889136	0.897079	0	0	0.454199	0.0533706	ZMPSTE24
layer 3 of RSC	1/300	0.889136	0.897079	0	0	0.454199	0.0533706	HMGA1
layer 4 of RSC	1/300	0.889136	0.897079	0	0	0.454199	0.0533706	ARPC2
layer 5 of InsCx	1/300	0.889136	0.897079	0	0	0.454199	0.0533706	RGS16
layer 5 of PRh-Ect	1/300	0.889136	0.897079	0	0	0.454199	0.0533706	PABPC4
layer 5 of PaS	1/300	0.889136	0.897079	0	0	0.454199	0.0533706	ZMPSTE24
layer 6 of ERCx	1/300	0.889136	0.897079	0	0	0.454199	0.0533706	TIMP1
layer 6b of RSC	1/300	0.889136	0.897079	0	0	0.454199	0.0533706	HMGA1
liminal part of r2 alar plate	1/300	0.889136	0.897079	0	0	0.454199	0.0533706	RPL27
liminal part of r4 alar plate	1/300	0.889136	0.897079	0	0	0.454199	0.0533706	ARPC2
liminal part of the r5 alar plate	1/300	0.889136	0.897079	0	0	0.454199	0.0533706	MMP14
liminal periaqueductal gray of m2	1/300	0.889136	0.897079	0	0	0.454199	0.0533706	NRG4
liminal reticular formation of m2	1/300	0.889136	0.897079	0	0	0.454199	0.0533706	RPL30
lower basal perifornical nucleus	1/300	0.889136	0.897079	0	0	0.454199	0.0533706	ATP5L
m1 (rostral) midbrain tegmentum	1/300	0.889136	0.897079	0	0	0.454199	0.0533706	DUSP6
m1 part of parabrachialis pigmentosus	1/300	0.889136	0.897079	0	0	0.454199	0.0533706	LAPTM5
m2 part of paranigral nucleus	1/300	0.889136	0.897079	0	0	0.454199	0.0533706	MTDH
m2 part of pararubral nucleus	1/300	0.889136	0.897079	0	0	0.454199	0.0533706	S100A6
magnocellular (medial) subparafascicular nucleus	1/300	0.889136	0.897079	0	0	0.454199	0.0533706	HLA-A
mammillary part of PHyB	1/300	0.889136	0.897079	0	0	0.454199	0.0533706	MTDH
mantle zone of CoPL	1/300	0.889136	0.897079	0	0	0.454199	0.0533706	ACTN4
mantle zone of Hb	1/300	0.889136	0.897079	0	0	0.454199	0.0533706	SLC20A1
mantle zone of ITTh	1/300	0.889136	0.897079	0	0	0.454199	0.0533706	MMP9
mantle zone of JcPD	1/300	0.889136	0.897079	0	0	0.454199	0.0533706	HNRNPU
mantle zone of JcPV	1/300	0.889136	0.897079	0	0	0.454199	0.0533706	ACTN4
mantle zone of PHyB-P	1/300	0.889136	0.897079	0	0	0.454199	0.0533706	MTDH
mantle zone of PPaA	1/300	0.889136	0.897079	0	0	0.454199	0.0533706	SERF2
mantle zone of PSPa	1/300	0.889136	0.897079	0	0	0.454199	0.0533706	CFL1
mantle zone of PaS	1/300	0.889136	0.897079	0	0	0.454199	0.0533706	ZMPSTE24
mantle zone of PalSe	1/300	0.889136	0.897079	0	0	0.454199	0.0533706	TAGLN2
mantle zone of PcPL	1/300	0.889136	0.897079	0	0	0.454199	0.0533706	ARPC2
mantle zone of PrS	1/300	0.889136	0.897079	0	0	0.454199	0.0533706	ZMPSTE24
mantle zone of RMa	1/300	0.889136	0.897079	0	0	0.454199	0.0533706	MTDH
mantle zone of Str	1/300	0.889136	0.897079	0	0	0.454199	0.0533706	SLC20A1
mantle zone of THyB-P	1/300	0.889136	0.897079	0	0	0.454199	0.0533706	ATP5G3
mantle zone of ZIC	1/300	0.889136	0.897079	0	0	0.454199	0.0533706	CDKN1A
mantle zone of isBI	1/300	0.889136	0.897079	0	0	0.454199	0.0533706	DUSP6
mantle zone of m1AD	1/300	0.889136	0.897079	0	0	0.454199	0.0533706	PABPC4
mantle zone of m1B	1/300	0.889136	0.897079	0	0	0.454199	0.0533706	S100A6
mantle zone of m2B	1/300	0.889136	0.897079	0	0	0.454199	0.0533706	DUSP6
mantle zone of p1B	1/300	0.889136	0.897079	0	0	0.454199	0.0533706	DUSP6
mantle zone of p2B	1/300	0.889136	0.897079	0	0	0.454199	0.0533706	BTG1
mantle zone of r10BM	1/300	0.889136	0.897079	0	0	0.454199	0.0533706	CALR
mantle zone of r1BI	1/300	0.889136	0.897079	0	0	0.454199	0.0533706	DUSP6
mantle zone of r1Ve	1/300	0.889136	0.897079	0	0	0.454199	0.0533706	ARPC2
mantle zone of r2BI	1/300	0.889136	0.897079	0	0	0.454199	0.0533706	RPL27
mantle zone of r2BL	1/300	0.889136	0.897079	0	0	0.454199	0.0533706	DUSP6
mantle zone of r2Tr	1/300	0.889136	0.897079	0	0	0.454199	0.0533706	RPL30
mantle zone of r3BI	1/300	0.889136	0.897079	0	0	0.454199	0.0533706	MSN
mantle zone of r3BM	1/300	0.889136	0.897079	0	0	0.454199	0.0533706	MSN
mantle zone of r3Tr	1/300	0.889136	0.897079	0	0	0.454199	0.0533706	RPL30
mantle zone of r4BM	1/300	0.889136	0.897079	0	0	0.454199	0.0533706	MMP14
mantle zone of r4Co	1/300	0.889136	0.897079	0	0	0.454199	0.0533706	RPS14
mantle zone of r4Tr	1/300	0.889136	0.897079	0	0	0.454199	0.0533706	FCER1G
mantle zone of r5Lim	1/300	0.889136	0.897079	0	0	0.454199	0.0533706	MMP14
mantle zone of r6BI	1/300	0.889136	0.897079	0	0	0.454199	0.0533706	LAPTM5
mantle zone of the PBC	1/300	0.889136	0.897079	0	0	0.454199	0.0533706	ACTN4
medial amygdala, anteroventral part	1/300	0.889136	0.897079	0	0	0.454199	0.0533706	SLC20A1
medial basal reticular formation of m1	1/300	0.889136	0.897079	0	0	0.454199	0.0533706	S100A6
medial habenular nucleus	1/300	0.889136	0.897079	0	0	0.454199	0.0533706	SLC20A1
medial part of r10B	1/300	0.889136	0.897079	0	0	0.454199	0.0533706	CALR
medial part of r1B	1/300	0.889136	0.897079	0	0	0.454199	0.0533706	MCL1
medial part of r3B	1/300	0.889136	0.897079	0	0	0.454199	0.0533706	MSN
medial part of the lateral habenular nucleus	1/300	0.889136	0.897079	0	0	0.454199	0.0533706	RPS19
medial pretectal nucleus	1/300	0.889136	0.897079	0	0	0.454199	0.0533706	HNRNPU
microcellular tegmental nucleus	1/300	0.889136	0.897079	0	0	0.454199	0.0533706	RPL30
oculomotor nucleus, main part	1/300	0.889136	0.897079	0	0	0.454199	0.0533706	HSPG2
oval paracentral nucleus	1/300	0.889136	0.897079	0	0	0.454199	0.0533706	RPS19
p1 part of parabrachial pigmented nucleus	1/300	0.889136	0.897079	0	0	0.454199	0.0533706	LAPTM5
p1 part of the substantia nigra compacta	1/300	0.889136	0.897079	0	0	0.454199	0.0533706	BTG1
p2 portion of the parabrachial pigmented nucleus	1/300	0.889136	0.897079	0	0	0.454199	0.0533706	LAPTM5
p3 portion of paranigral nucleus	1/300	0.889136	0.897079	0	0	0.454199	0.0533706	MTDH
pallidal islands of Calleja	1/300	0.889136	0.897079	0	0	0.454199	0.0533706	PRDX1
pallidal septum	1/300	0.889136	0.897079	0	0	0.454199	0.0533706	TAGLN2
parabrachial complex	1/300	0.889136	0.897079	0	0	0.454199	0.0533706	ACTN4
pararubral nucleus, m1 part	1/300	0.889136	0.897079	0	0	0.454199	0.0533706	S100A6
parastrial preoptic nucleus	1/300	0.889136	0.897079	0	0	0.454199	0.0533706	ENO1
paraterete nucleus	1/300	0.889136	0.897079	0	0	0.454199	0.0533706	ATP5L
paraventricular nucleus, lateral part	1/300	0.889136	0.897079	0	0	0.454199	0.0533706	ACTN4
parvicellular interstitial nucleus of the posterior commissure	1/300	0.889136	0.897079	0	0	0.454199	0.0533706	CCL20
peduncular subparaventricular area	1/300	0.889136	0.897079	0	0	0.454199	0.0533706	CFL1
perimammillary part of PHyB	1/300	0.889136	0.897079	0	0	0.454199	0.0533706	MTDH
perimammillary part of THyB	1/300	0.889136	0.897079	0	0	0.454199	0.0533706	ATP5G3
perirhinal-ectorhinal cortex	1/300	0.889136	0.897079	0	0	0.454199	0.0533706	PABPC4
periventricular stratum of CoPV	1/300	0.889136	0.897079	0	0	0.454199	0.0533706	RPL37
periventricular stratum of DTTh	1/300	0.889136	0.897079	0	0	0.454199	0.0533706	ZMPSTE24
periventricular stratum of Hb	1/300	0.889136	0.897079	0	0	0.454199	0.0533706	SLC20A1
periventricular stratum of PO1	1/300	0.889136	0.897079	0	0	0.454199	0.0533706	ENO1
periventricular stratum of Pal	1/300	0.889136	0.897079	0	0	0.454199	0.0533706	SLC20A1
periventricular stratum of PcPL	1/300	0.889136	0.897079	0	0	0.454199	0.0533706	CCL20
periventricular stratum of RMa	1/300	0.889136	0.897079	0	0	0.454199	0.0533706	MTDH
periventricular stratum of VTTh	1/300	0.889136	0.897079	0	0	0.454199	0.0533706	HLA-A
periventricular stratum of isBL	1/300	0.889136	0.897079	0	0	0.454199	0.0533706	HLA-A
periventricular stratum of m2AD	1/300	0.889136	0.897079	0	0	0.454199	0.0533706	PABPC4
periventricular stratum of m2AL	1/300	0.889136	0.897079	0	0	0.454199	0.0533706	ACTN4
periventricular stratum of m2Lim	1/300	0.889136	0.897079	0	0	0.454199	0.0533706	NRG4
periventricular stratum of r2BM	1/300	0.889136	0.897079	0	0	0.454199	0.0533706	ARPC2
periventricular stratum of r5BM	1/300	0.889136	0.897079	0	0	0.454199	0.0533706	LAPTM5
periventricular stratum of r6Co	1/300	0.889136	0.897079	0	0	0.454199	0.0533706	RAB31
periventricular stratum of r6Ve	1/300	0.889136	0.897079	0	0	0.454199	0.0533706	RPL11
periventricular stratum of r7BM	1/300	0.889136	0.897079	0	0	0.454199	0.0533706	RPL27
periventricular stratum of r7Ve	1/300	0.889136	0.897079	0	0	0.454199	0.0533706	RPL11
periventricular stratum of r8BM	1/300	0.889136	0.897079	0	0	0.454199	0.0533706	RPL27
periventricular stratum of r8Tr	1/300	0.889136	0.897079	0	0	0.454199	0.0533706	RPL27
periventricular stratum of the VAP	1/300	0.889136	0.897079	0	0	0.454199	0.0533706	RAB31
posterior tegmental nucleus	1/300	0.889136	0.897079	0	0	0.454199	0.0533706	TAGLN2
posterior triangular nucleus	1/300	0.889136	0.897079	0	0	0.454199	0.0533706	YBX1
posteromedial cortical amygdaloid area	1/300	0.889136	0.897079	0	0	0.454199	0.0533706	PRDX1
pretectal tegmentum	1/300	0.889136	0.897079	0	0	0.454199	0.0533706	DUSP6
pretectum	1/300	0.889136	0.897079	0	0	0.454199	0.0533706	ACTN4
prethalamus	1/300	0.889136	0.897079	0	0	0.454199	0.0533706	CDKN1A
prosomere 3	1/300	0.889136	0.897079	0	0	0.454199	0.0533706	CDKN1A
pterigoid muscle trigeminal motor cell group	1/300	0.889136	0.897079	0	0	0.454199	0.0533706	RPL30
r1 part of basolateral reticular formation	1/300	0.889136	0.897079	0	0	0.454199	0.0533706	DUSP6
r1 part of basomedial reticular formation	1/300	0.889136	0.897079	0	0	0.454199	0.0533706	PPT1
r1 part of dorsal parvicellular reticular formation	1/300	0.889136	0.897079	0	0	0.454199	0.0533706	TAGLN2
r1 part of intermediate nucleus of the lateral lemniscus	1/300	0.889136	0.897079	0	0	0.454199	0.0533706	RPL30
r10 part of basomedial reticular formation	1/300	0.889136	0.897079	0	0	0.454199	0.0533706	HLA-A
r10 part of dorsal parvicellular reticular formation	1/300	0.889136	0.897079	0	0	0.454199	0.0533706	H2AFY
r2 basal plate	1/300	0.889136	0.897079	0	0	0.454199	0.0533706	DUSP6
r2 part of dorsal parvicellular reticular formation	1/300	0.889136	0.897079	0	0	0.454199	0.0533706	RPL30
r2 part of prepontine raphe nucleus	1/300	0.889136	0.897079	0	0	0.454199	0.0533706	TAGLN2
r2 part of the trigeminal motor nucleus	1/300	0.889136	0.897079	0	0	0.454199	0.0533706	RPL30
r2 part of the ventral parvicellular reticular formation	1/300	0.889136	0.897079	0	0	0.454199	0.0533706	FCER1G
r2 part of trigeminal sensory column	1/300	0.889136	0.897079	0	0	0.454199	0.0533706	RPL30
r2 part of trigeminal transition zone	1/300	0.889136	0.897079	0	0	0.454199	0.0533706	RPL30
r2 part of vestibular sensory column	1/300	0.889136	0.897079	0	0	0.454199	0.0533706	ARPC2
r3 alar plate	1/300	0.889136	0.897079	0	0	0.454199	0.0533706	RPL30
r3 part of basolateral reticular formation	1/300	0.889136	0.897079	0	0	0.454199	0.0533706	DUSP6
r3 part of magnocellular medial vestibular nucleus	1/300	0.889136	0.897079	0	0	0.454199	0.0533706	FCER1G
r3 part of medial pontine nuclei	1/300	0.889136	0.897079	0	0	0.454199	0.0533706	RPS16
r3 part of reticulotegmental nucleus, shell portion	1/300	0.889136	0.897079	0	0	0.454199	0.0533706	MSN
r3 part of ventral parvicellular reticular formation	1/300	0.889136	0.897079	0	0	0.454199	0.0533706	FCER1G
r4 part of basointermediate reticular formation	1/300	0.889136	0.897079	0	0	0.454199	0.0533706	RPL27
r4 part of cochlear sensory column	1/300	0.889136	0.897079	0	0	0.454199	0.0533706	RPS14
r4 part of posteroventral cochlear nucleus	1/300	0.889136	0.897079	0	0	0.454199	0.0533706	RPS14
r4 part of reticulotegmental nucleus, shell portion	1/300	0.889136	0.897079	0	0	0.454199	0.0533706	MMP14
r4 part of trigeminal sensory column	1/300	0.889136	0.897079	0	0	0.454199	0.0533706	FCER1G
r4 part of ventral parvicellular reticular formation	1/300	0.889136	0.897079	0	0	0.454199	0.0533706	FCER1G
r5 part of A5 noradrenergic cell group	1/300	0.889136	0.897079	0	0	0.454199	0.0533706	FCER1G
r5 part of basointermediate reticular formation	1/300	0.889136	0.897079	0	0	0.454199	0.0533706	MMP14
r5 part of ventral lateral lemniscal nucleus	1/300	0.889136	0.897079	0	0	0.454199	0.0533706	APLP2
r5 part of ventral parvicellular reticular formation	1/300	0.889136	0.897079	0	0	0.454199	0.0533706	MMP14
r6 part of basointermediate reticular formation	1/300	0.889136	0.897079	0	0	0.454199	0.0533706	LAPTM5
r6 part of dorsal cochlear nucleus	1/300	0.889136	0.897079	0	0	0.454199	0.0533706	RAB31
r6 part of gigantocellular reticular area	1/300	0.889136	0.897079	0	0	0.454199	0.0533706	RPL37
r6 part of parvocellular medial vestibular nucleus	1/300	0.889136	0.897079	0	0	0.454199	0.0533706	RPL11
r6 part of the basolateral reticular formation	1/300	0.889136	0.897079	0	0	0.454199	0.0533706	MMP14
r6 part of trigeminal transition zone	1/300	0.889136	0.897079	0	0	0.454199	0.0533706	RPL30
r6 part of ventral gigangocellular reticular area	1/300	0.889136	0.897079	0	0	0.454199	0.0533706	B2M
r6 part of ventral parvicellular reticular formation	1/300	0.889136	0.897079	0	0	0.454199	0.0533706	MMP14
r7 part of basomedial reticular formation	1/300	0.889136	0.897079	0	0	0.454199	0.0533706	B2M
r7 part of gigantocellular reticular area	1/300	0.889136	0.897079	0	0	0.454199	0.0533706	RPL37
r7 part of paragigantocellular nucleus	1/300	0.889136	0.897079	0	0	0.454199	0.0533706	PSAP
r7 part of parvocellular medial vestibular nucleus	1/300	0.889136	0.897079	0	0	0.454199	0.0533706	RPL11
r7 part of the basointermediate reticular formation	1/300	0.889136	0.897079	0	0	0.454199	0.0533706	RPL37
r7 part of the nucleus of Roller	1/300	0.889136	0.897079	0	0	0.454199	0.0533706	RPL27
r7 portion of the hypoglossal motor nucleus	1/300	0.889136	0.897079	0	0	0.454199	0.0533706	RPL27
r8 (gustatory) part of solitary complex	1/300	0.889136	0.897079	0	0	0.454199	0.0533706	RPL27
r8 part of dorsal parvicellular reticular formation	1/300	0.889136	0.897079	0	0	0.454199	0.0533706	H2AFY
r8 part of gigantocellular reticular area	1/300	0.889136	0.897079	0	0	0.454199	0.0533706	B2M
r8 part of linear nucleus	1/300	0.889136	0.897079	0	0	0.454199	0.0533706	APLP2
r8 portion of ambiguous motor nucleus	1/300	0.889136	0.897079	0	0	0.454199	0.0533706	RPL31
r8 portion of the hypoglossal motor nucleus	1/300	0.889136	0.897079	0	0	0.454199	0.0533706	RPL27
r9 part of dorsal parvicellular reticular formation	1/300	0.889136	0.897079	0	0	0.454199	0.0533706	RPL27
r9 part of external cuneate nucleus	1/300	0.889136	0.897079	0	0	0.454199	0.0533706	RPS21
red nucleus, magnocellular part	1/300	0.889136	0.897079	0	0	0.454199	0.0533706	LAPTM5
red nucleus, parvicellular part	1/300	0.889136	0.897079	0	0	0.454199	0.0533706	TAGLN2
reticular formation of CoPL	1/300	0.889136	0.897079	0	0	0.454199	0.0533706	TIMP1
reticular formation of p1Lim	1/300	0.889136	0.897079	0	0	0.454199	0.0533706	RPL30
reticular formation of p2Lim	1/300	0.889136	0.897079	0	0	0.454199	0.0533706	BTG1
retromammillary area	1/300	0.889136	0.897079	0	0	0.454199	0.0533706	MTDH
retromammillary area, lateral part	1/300	0.889136	0.897079	0	0	0.454199	0.0533706	TMED9
retromammillary area, medial part	1/300	0.889136	0.897079	0	0	0.454199	0.0533706	MTDH
retrosplenial cortex	1/300	0.889136	0.897079	0	0	0.454199	0.0533706	ARPC2
rostral interstitial nucleus	1/300	0.889136	0.897079	0	0	0.454199	0.0533706	ARPC2
rostral zona incerta	1/300	0.889136	0.897079	0	0	0.454199	0.0533706	CDKN1A
shell of SCH	1/300	0.889136	0.897079	0	0	0.454199	0.0533706	PFN1
striatum (corpus striatum)	1/300	0.889136	0.897079	0	0	0.454199	0.0533706	SLC20A1
subcuneiform nucleus	1/300	0.889136	0.897079	0	0	0.454199	0.0533706	ARPC2
subpretectal nucleus	1/300	0.889136	0.897079	0	0	0.454199	0.0533706	ACTN4
substantia innominata/basal nucleus, transitional part	1/300	0.889136	0.897079	0	0	0.454199	0.0533706	FTH1
substantia nigra compacta, isthmic part	1/300	0.889136	0.897079	0	0	0.454199	0.0533706	TYROBP
subthalamic nucleus (migrated)	1/300	0.889136	0.897079	0	0	0.454199	0.0533706	FTH1
superficial part of arcuate nucleus	1/300	0.889136	0.897079	0	0	0.454199	0.0533706	CAP1
superficial stratum of PHyB-P	1/300	0.889136	0.897079	0	0	0.454199	0.0533706	MTDH
superficial stratum of PHyB-V	1/300	0.889136	0.897079	0	0	0.454199	0.0533706	ATP5L
superficial stratum of PPaA	1/300	0.889136	0.897079	0	0	0.454199	0.0533706	FTH1
superficial stratum of PaS (cortical plate/marginal zone)	1/300	0.889136	0.897079	0	0	0.454199	0.0533706	ZMPSTE24
superficial stratum of PcPV	1/300	0.889136	0.897079	0	0	0.454199	0.0533706	NRG4
superficial stratum of TPaA	1/300	0.889136	0.897079	0	0	0.454199	0.0533706	PFN1
superficial stratum of TSPaA	1/300	0.889136	0.897079	0	0	0.454199	0.0533706	PFN1
superficial stratum of p1B	1/300	0.889136	0.897079	0	0	0.454199	0.0533706	RPL15
superficial stratum of p3B	1/300	0.889136	0.897079	0	0	0.454199	0.0533706	MTDH
superficial stratum of r1BL	1/300	0.889136	0.897079	0	0	0.454199	0.0533706	RPL30
superficial stratum of r2Lim	1/300	0.889136	0.897079	0	0	0.454199	0.0533706	RPL30
superficial stratum of r3BM	1/300	0.889136	0.897079	0	0	0.454199	0.0533706	RPS16
superficial stratum of r4Co	1/300	0.889136	0.897079	0	0	0.454199	0.0533706	RPS14
superficial stratum of r5Lim	1/300	0.889136	0.897079	0	0	0.454199	0.0533706	FCER1G
superficial stratum of r6Lim	1/300	0.889136	0.897079	0	0	0.454199	0.0533706	APLP2
superficial stratum of r7Tr	1/300	0.889136	0.897079	0	0	0.454199	0.0533706	RPS3
superficial stratum of r8Lim	1/300	0.889136	0.897079	0	0	0.454199	0.0533706	RPL31
superficial stratum of r9Ve	1/300	0.889136	0.897079	0	0	0.454199	0.0533706	RPS21
superficial stratum of the PBC	1/300	0.889136	0.897079	0	0	0.454199	0.0533706	RPL30
superficial stratum of the VAP	1/300	0.889136	0.897079	0	0	0.454199	0.0533706	PFDN5
temporotympanic muscle trigeminal motor cell group	1/300	0.889136	0.897079	0	0	0.454199	0.0533706	RPL30
terminal nucleus of the stria medullaris	1/300	0.889136	0.897079	0	0	0.454199	0.0533706	ENO1
thalamic tegmentum	1/300	0.889136	0.897079	0	0	0.454199	0.0533706	BTG1
upper basal lateral hypothalamic area	1/300	0.889136	0.897079	0	0	0.454199	0.0533706	CFL1
upper basal perifornical nucleus	1/300	0.889136	0.897079	0	0	0.454199	0.0533706	ARPC2
ventral juxtacommissural pretectal nucleus	1/300	0.889136	0.897079	0	0	0.454199	0.0533706	ACTN4
ventral part of JcP	1/300	0.889136	0.897079	0	0	0.454199	0.0533706	ACTN4
ventral tier of thalamus	1/300	0.889136	0.897079	0	0	0.454199	0.0533706	NRG4
zona incerta complex	1/300	0.889136	0.897079	0	0	0.454199	0.0533706	CDKN1A
Cuneiform nucleus	2/526	0.897734	0.905249	0	0	0.515961	0.0556625	ACTN4;YBX1
Anterior tegmental nucleus	2/568	0.920411	0.927598	0	0	0.476636	0.0395297	RPL27;HSPG2
Trochlear nucleus	1/361	0.929404	0.936139	0	0	0.376061	0.0275322	HSPG2
Nucleus of the lateral olfactory tract	1/371	0.934447	0.940694	0	0	0.365709	0.0247951	RPL30
Central amygdalar nucleus, lateral part	1/388	0.942213	0.947984	0	0	0.34934	0.020794	GDF15
Ventromedial hypothalamic nucleus	1/409	0.950556	0.955845	0	0	0.331001	0.0167846	ATP5L
Rhomboid nucleus	1/414	0.952359	0.957126	0	0	0.32691	0.0159577	CFL1
Dorsal tegmental nucleus	1/421	0.954774	0.958823	0	0	0.321346	0.0148722	RPL27
Suprachiasmatic nucleus	1/422	0.955108	0.958823	0	0	0.320566	0.0147237	ENO1
Subgeniculate nucleus	1/437	0.959847	0.962808	0	0	0.309299	0.0126756	CDKN1A
Fasciola cinerea	1/438	0.960144	0.962808	0	0	0.308575	0.0125503	SLC20A1
Parasubiculum	1/441	0.961024	0.963156	0	0	0.306424	0.0121822	ZMPSTE24
Field CA2, stratum radiatum	1/458	0.965657	0.967263	0	0	0.294767	0.0103012	SPP1
Septofimbrial nucleus	1/505	0.975809	0.97689	0	0	0.266631	0.00652939	RPL35A
Taenia tecta	1/512	0.977041	0.977381	0	0	0.262883	0.00610597	RGS16
Dorsal premammillary nucleus	1/514	0.977381	0.977381	0	0	0.261831	0.00599034	HLA-A

## Sheet: Disease Perturbations from GEO down
Term	Overlap	P-value	Adjusted P-value	Old P-value	Old Adjusted P-value	Odds Ratio	Combined Score	Genes
Down syndrome DOID-14250 human GSE19681 sample 1066	52/320	1.36026e-56	1.02563e-53	0	0	40.8652	5256.78	RPL5;RPL30;CD81;YBX1;ACTG1;CHCHD2;LASP1;RPS16;RPS19;CFL1;RPLP2;RPL38;RPS11;TMSB10;B2M;CAP1;SRGN;HSP90AA1;H2AFY;RPL23;PABPC4;HLA-B;HLA-A;MYL6;TYROBP;RPL27;UBA52;ND2;PFDN5;FTL;CD63;GRN;RPL11;UQCRH;ATP5L;PRDX1;UBC;PSAP;RPL15;RPL18;RPS27A;LAPTM5;RPL35A;ARPC2;RPL27A;PPT1;FAU;RPS21;CALM2;RPS24;EIF4G2;TPT1
multiple sclerosis DOID-2377 human GSE21942 sample 743	50/299	5.86677e-55	2.21177e-52	0	0	41.4416	5174.93	RPL30;RPL32;YWHAB;RPLP1;ITGB2;DBI;ENO1;ATP5G3;YBX1;ACTB;ACTG1;RPS19;RPS18;FTH1;RPLP2;SH3BGRL3;TIMP1;RPS11;TMSB10;B2M;FCER1G;RPS8;RPL23;APLP2;HLA-B;RHOA;DUSP6;MYL6;TYROBP;CSDE1;RPL37A;S100A4;TAGLN2;LCP1;PFN1;ND3;UBA52;GAPDH;FTL;OAZ1;UQCRH;PRDX1;PSAP;COX2;COX1;ARPC2;FAU;RPS21;CALM2;TPT1
familial hypercholesterolemia DOID-13810 human GSE6088 sample 907	48/279	2.7744e-53	6.973e-51	0	0	42.0383	5087.33	RPL5;CD63;HSP90AB1;BTG1;RPLP1;ITGB2;RPL11;YBX1;OAZ1;ACTB;UQCRH;CHCHD2;TUBA1B;RPS16;RPS19;FTH1;PRDX1;UBC;PSAP;COX3;RPS3;COX2;RPLP2;TIMP1;B2M;RPS12;SRGN;HSP90AA1;FCER1G;RPS8;RPL23;RPS6;HLA-B;RPL35A;HLA-A;RHOA;TYROBP;ARPC2;CSDE1;S100A6;S100A4;LCP1;FAU;UBA52;CALM2;PFDN5;GAPDH;FTL
Rotavirus infection of children C1442797 human GSE2729 sample 43	45/307	1.64357e-46	3.09813e-44	0	0	33.6521	3547.67	RPL5;RPL30;RPL32;RPL31;YWHAB;RPLP1;ITGB2;RPL11;ATP5G3;OAZ1;ACTB;ACTG1;RPS4X;RPS14;LASP1;RPS16;PRDX1;PSAP;RPS3;RPLP2;RPL15;RPS11;RPL18;RPS27A;TMSB10;CAP1;FCER1G;RPS8;ACTN1;RPL23;APLP2;RPS6;EEF2;DUSP6;TYROBP;ARPC2;TAGLN2;RPL27;LCP1;PFN1;RPS21;CALM2;PFDN5;RPS24;TPT1
Lung transplant rejection C0729958 human GSE2018 sample 66	42/265	8.4888e-45	1.28011e-42	0	0	35.8981	3642.85	CD63;IL1RN;GRN;HSP90AB1;CXCL8;CD81;DBI;ATP5G3;YBX1;OAZ1;ACTB;UQCRH;LASP1;TUBA1B;UBB;FTH1;PRDX1;CFL1;PSAP;SH3BGRL3;TMSB10;CTSD;HSP90AA1;FCER1G;RPL23;APLP2;PLAUR;LAPTM5;RHOA;MYL6;RAB31;TYROBP;ARPC2;IL1B;S100A6;S100A4;TAGLN2;PLIN2;LCP1;PFN1;CALM2;PFDN5
Hypoxia C0242184 human GSE4630 sample 250	45/349	6.55733e-44	8.24038e-42	0	0	28.9406	2877.66	RPL5;CD63;CDKN1A;HSP90AB1;RPL32;SLC20A1;RPLP1;RPL11;DBI;ATP5G3;YBX1;ACTG1;TUBA1B;RPS16;RPS19;RPS18;PRDX1;CFL1;PSAP;RPS3;RPLP2;RPL38;RPL15;RPS11;RPL18;RPS27A;B2M;CTSD;RPS12;CAP1;HSP90AA1;FCER1G;RPS8;GDF15;ACTN1;RPS6;LAPTM5;EEF2;MYL6;ARPC2;RPL27A;CALR;FAU;PFN1;EIF4G2
Huntington's disease DOID-12858 human GSE1751 sample 796	44/327	9.77576e-44	1.05299e-41	0	0	30.1287	2983.76	CD63;RPL30;HSP90AB1;YWHAB;ITGB2;ENO1;OAZ1;ACTB;ACTG1;RPS4X;LASP1;TUBA1B;RPS16;RPS19;UBB;CFL1;RPS3;RPL38;SH3BGRL3;RPL18;RPS27A;TMSB10;SERF2;CAP1;FCER1G;RPS6;HLA-B;LAPTM5;MSN;ACTN4;HLA-A;EEF2;MMP9;RHOA;RPL27A;RPL37A;S100A6;S100A4;TAGLN2;LCP1;PFN1;UBA52;GAPDH;FTL
Bacterial Infection C0004623 human GSE3026 sample 322	38/215	2.458e-42	2.30115e-40	0	0	39.4828	3782.81	RPL5;RPL30;BTG1;RPL32;RPL31;RPL11;IFI6;YBX1;RPS4X;RPS14;RPS19;FTH1;RPS3;RPLP2;RPL38;RPL37;RPL15;RPL18;RPS27A;TMSB10;RPS12;SRGN;HSP90AA1;RPL23;HMGA1;HLA-A;MMP9;TYROBP;ARPC2;RPL27A;RPL37A;RPL27;CALR;FAU;RPS21;PFDN5;RPS24;TPT1
Retinal damage C0235272 rat GSE1001 sample 312	41/279	2.74673e-42	2.30115e-40	0	0	32.4942	3109.64	RPL5;RPL30;HSP90AB1;RPL31;YWHAB;ATP6;HNRNPU;ACTB;MTDH;RPS4X;TUBA1B;RPS19;UBB;RPS18;FTH1;CFL1;COX3;RPS3;RPLP2;RPL37;RPL18;TMSB10;RPS12;HSP90AA1;RPS8;EEF2;MYL6;RPL27A;CANX;S100A4;RPL27;ND1;CYTB;PFN1;UBA52;ND2;RPS21;GAPDH;EIF4G2;TPT1;ND4
autism spectrum disorder DOID-0060041 human GSE25507 sample 1021	43/346	3.53923e-41	2.57098e-39	0	0	27.203	2533.74	RPL5;RPL30;HSP90AB1;CXCL8;BTG1;YWHAB;ATP6;ITGB2;RPL11;YBX1;OAZ1;ACTB;ACTG1;RPS4X;RPS18;FTH1;CFL1;UBC;PSAP;COX2;COX1;SRGN;HSP90AA1;RPS8;APLP2;LAPTM5;MSN;EEF2;RHOA;DUSP6;RAB31;CSDE1;PPT1;TAGLN2;RPL27;LCP1;PFN1;SMAP2;ND2;CALM2;EIF4G2;ND4;FTL
skin squamous cell carcinoma DOID-3151 human GSE2503 sample 627	44/373	3.75076e-41	2.57098e-39	0	0	25.8552	2406.71	RPL5;CD63;RPL30;RPL32;RPL31;RPLP1;DBI;ATP5G3;UQCRH;ATP5L;RPS4X;RPS14;CHCHD2;RPS16;RPS19;RPS18;UBC;RPS3;SPP1;RPL37;RPL15;RPS11;RPS27A;B2M;SERF2;RPS12;RPS8;RPL23;RPS6;RPL35A;EEF2;RPL27A;S100A6;CHI3L1;S100A4;RPL27;PLIN2;FAU;UBA52;RPS21;CALM2;PFDN5;RPS24;TPT1
Zaire ebolavirus DOID-4325 human GSE31747 sample 497	40/287	2.85587e-40	1.79444e-38	0	0	30.2418	2753.63	RPL30;GRN;CD81;RPL31;YWHAB;RPLP1;ENO1;ATP5G3;ACTB;RPS4X;LASP1;RPS16;RPS19;RPS18;PSAP;RPS3;SPP1;RPLP2;RPL38;RPL37;RPL15;RPL18;RPS27A;TMSB10;CAP1;H2AFY;RPS8;GDF15;MMP9;RHOA;DUSP6;RAB31;TYROBP;RPL27A;CANX;RPL37A;PLIN2;CALM2;GAPDH;FTL
multiple sclerosis DOID-2377 human GSE16461 sample 584	46/452	4.06188e-40	2.35589e-38	0	0	22.2584	2018.88	CD63;CXCL8;BTG1;RPLP1;ATP6;ITGB2;RPL11;YBX1;ACTB;UQCRH;ACTG1;ATP5L;CHCHD2;LASP1;TUBA1B;FTH1;CFL1;PSAP;RPS3;RPLP2;COX1;SH3BGRL3;RPL37;TIMP1;TMSB10;IER3;RPS8;RPL23;PABPC4;MSN;RPL35A;ARPC2;IL1B;S100A4;TAGLN2;RPL27;PFN1;SMAP2;UBA52;ND2;RPS21;CALM2;PFDN5;RPS24;ND4;FTL
familial hypercholesterolemia DOID-13810 human GSE6088 sample 908	41/317	6.25243e-40	3.36738e-38	0	0	27.9661	2524.51	RPL5;HSP90AB1;BTG1;YWHAB;ATP6;ITGB2;RPL11;OAZ1;ACTB;UQCRH;CHCHD2;TUBA1B;RPS16;RPS19;FTH1;PSAP;COX3;COX2;RPLP2;B2M;CAP1;HSP90AA1;FCER1G;RPS8;RPL23;PABPC4;RPS6;HLA-B;RPL35A;HLA-A;RHOA;TYROBP;ARPC2;CSDE1;S100A6;MALAT1;LCP1;FAU;ND3;PFDN5;FTL
Teratospermia UMLS CUI-C0919628 human GSE6872 sample 953	42/372	2.11012e-38	1.06069e-36	0	0	24.1262	2092.98	RPL5;RPL30;RPL32;CD81;RPL31;ATP6;RPL11;DBI;ACTB;UQCRH;RPS4X;RPS16;UBB;RPS18;FTH1;UBC;COX3;RPS3;COX2;RPL38;COX1;RPL37;RPS11;RPS27A;B2M;RPS12;SRGN;HSP90AA1;RPS6;EEF2;MYL6;ARPC2;RPL37A;RPL27;MALAT1;ND3;UBA52;CALM2;RPS24;TPT1;ND4;FTL
Cardiac Hypertrophy C1383860 rat GSE1055 sample 354	45/467	3.88787e-38	1.83216e-36	0	0	20.7224	1785.03	RPL5;GRN;HSP90AB1;BTG1;CD81;RPL11;ENO1;YBX1;OAZ1;ACTB;ACTG1;PRDX1;PSAP;RPS3;COX2;RPL15;RPS11;RPS27A;B2M;CTSD;IER3;HSP90AA1;RPS8;APLP2;PABPC4;RPS6;MSN;ACTN4;EEF2;RHOA;MMP14;ARPC2;CSDE1;CANX;TAGLN2;RPL27;ND1;CALR;PFN1;ND2;CALM2;GAPDH;RPS24;EIF4G2;TPT1
Sickle Cell Anemia C0002895 human GSE9877 sample 109	34/197	1.89929e-37	8.42392e-36	0	0	37.0048	3128.91	RPL30;RPL32;RPL31;IFI6;ENO1;YBX1;OAZ1;ACTB;ACTG1;ATP5L;RPS19;RPS18;CFL1;UBC;RPS3;RPLP2;RPL37;RPS11;RPL18;RPS27A;TMSB10;B2M;IER3;SRGN;HSP90AA1;RPS8;RPL23;EEF2;RPL27A;S100A6;TAGLN2;RPS21;CALM2;TPT1
multiple sclerosis DOID-2377 human GSE38010 sample 737	38/290	3.68601e-37	1.54403e-35	0	0	27.6262	2317.6	CD63;RPL30;HSP90AB1;RPL32;CD81;RPLP1;RPL11;DBI;ENO1;YBX1;ACTB;ACTG1;CHCHD2;TUBA1B;RPS16;RPS19;RPS18;FTH1;PRDX1;CFL1;UBC;PSAP;RPS3;SPP1;RPLP2;RPS11;B2M;RPS12;RPS6;HLA-B;LAPTM5;HLA-A;RHOA;FAU;UBA52;GAPDH;TPT1;FTL
Actinic keratosis C0022602 human GSE2503 sample 350	43/429	4.15162e-37	1.64754e-35	0	0	21.263	1781.25	RPL5;CD63;RPL30;HSP90AB1;RPL32;RPL31;RPLP1;RPL11;ATP5G3;OAZ1;UQCRH;ATP5L;RPS4X;RPS14;CHCHD2;RPS16;RPS19;RPS18;RPS3;SPP1;RPL37;TIMP1;RPL15;RPS11;RPL18;RPS27A;SERF2;RPS8;RPL23;RPS6;RPL35A;EEF2;RPL27A;CSDE1;S100A6;CHI3L1;RPL27;PLIN2;FAU;UBA52;RPS21;PFDN5;RPS24
actinic keratosis DOID-8866 human GSE2503 sample 628	43/430	4.58949e-37	1.73024e-35	0	0	21.207	1774.43	RPL5;CD63;RPL30;HSP90AB1;RPL32;RPL31;RPLP1;RPL11;ATP5G3;OAZ1;UQCRH;ATP5L;RPS4X;RPS14;CHCHD2;RPS16;RPS19;RPS18;RPS3;SPP1;RPL37;TIMP1;RPL15;RPS11;RPL18;RPS27A;SERF2;RPS8;RPL23;RPS6;RPL35A;EEF2;RPL27A;CSDE1;S100A6;CHI3L1;RPL27;PLIN2;FAU;UBA52;RPS21;PFDN5;RPS24
Carcinoma in situ of large intestine C0686087 human GSE4183 sample 190	37/273	1.00796e-36	3.61905e-35	0	0	28.4802	2360.58	RPL5;RPL30;RPL32;RPLP1;RPL11;ATP5G3;UQCRH;ACTG1;ATP5L;RPS4X;TUBA1B;RPS16;RPS19;RPS18;FTH1;CFL1;PSAP;COX3;RPS3;TMSB10;B2M;CTSD;RPS12;RPS8;RPS6;HLA-B;MYL6;RPL37A;RPL27;MALAT1;PFN1;ND2;RPS21;RPS24;TPT1;ND4;FTL
Setleis syndrome C1744559 human GSE16524 sample 285	34/207	1.13085e-36	3.87573e-35	0	0	34.8481	2884.38	CD63;RPL30;CXCL8;BTG1;RPL31;RPLP1;ATP6;DBI;OAZ1;ACTG1;RPS4X;UBB;RPS18;FTH1;CFL1;UBC;COX2;B2M;IER3;HLA-B;HLA-A;RPL27A;RPL37A;S100A6;S100A4;PLIN2;ND3;ND2;CALM2;GAPDH;RPS24;TPT1;ND4;FTL
familial hypercholesterolemia DOID-13810 human GSE6054 sample 910	38/300	1.38504e-36	4.54051e-35	0	0	26.5583	2192.84	RPL5;HSP90AB1;BTG1;RPL11;YBX1;OAZ1;CHCHD2;RPS16;FTH1;UBC;PSAP;COX3;RPS3;RPLP2;TIMP1;RPL18;TMSB10;MCL1;HSP90AA1;FCER1G;RPS8;RPL23;RPS6;HLA-B;RHOA;DUSP6;RAB31;TYROBP;ARPC2;CSDE1;S100A6;RPL27;LCP1;FAU;SMAP2;ND2;RPS21;FTL
Alpha-1 anti-trypsin deficiency C0221757 human GSE1122 sample 281	40/356	1.96009e-36	6.15794e-35	0	0	23.5552	1936.71	CD63;RPL32;RPL31;YWHAB;RPLP1;RPL11;DBI;ENO1;YBX1;OAZ1;UQCRH;RPS16;RPS19;RPS18;FTH1;PRDX1;RPS3;RPL38;RPS11;RPL18;TMSB10;CTSD;CAP1;ACTN1;RPL23;RPS6;LAPTM5;RPL35A;RHOA;RAB31;ARPC2;RPL27A;CANX;S100A4;RPL27;PFN1;UBA52;RPS21;PFDN5;GAPDH
anemia DOID-2355 human GSE4619 sample 792	38/311	5.61975e-36	1.69492e-34	0	0	25.4738	2067.63	RPL5;RPL30;CXCL8;BTG1;RPL32;CD81;YWHAB;RPLP1;RPL11;ACTG1;RPS4X;RPS14;TUBA1B;RPS16;FTH1;UBC;PSAP;RPS3;RPLP2;COX1;RPL15;RPS11;RPL18;TMSB10;B2M;IER3;MCL1;SRGN;RPS8;RPS6;PLAUR;LAPTM5;HLA-A;IL1B;RPL27;MALAT1;EIF4G2;TPT1
Eczema C0013595 human GSE6012 sample 268	31/163	1.57283e-35	4.56119e-34	0	0	40.6308	3256.06	RPL30;BTG1;RPL32;RPL31;RPLP1;RPS14;RPS16;RPS19;RPS18;UBC;PSAP;RPLP2;RPL38;RPL37;RPL15;RPS11;RPL18;IER3;RPS12;RPS8;RPL23;RPS6;RPL35A;RPL27A;RPL37A;CHI3L1;RPL27;PLIN2;RPS21;PFDN5;TPT1
systemic lupus erythematosus (SLE) DOID-9074 human GSE36700 sample 512	37/294	1.69257e-35	4.72665e-34	0	0	26.125	2091.68	RPL5;CD63;RPL30;RPL32;RPL31;RPLP1;RPL11;RPS14;RPS16;RPS18;RPS3;RPLP2;RPL38;RPL37;TIMP1;RPL15;RPS11;RPL18;RPS27A;RPS12;CAP1;HSP90AA1;RPS8;RPS6;RPL35A;EEF2;HSPG2;MMP9;RPL27A;CHI3L1;RPL27;FAU;UBA52;RPS21;RPS24;TPT1;ND4
Diabetic Retinopathy C0011884 rat GSE1979 sample 189	35/254	5.69051e-35	1.53237e-33	0	0	28.5289	2249.55	RPL5;RPL30;HSP90AB1;BTG1;RPL31;YWHAB;ATP6;ENO1;OAZ1;RPS4X;RPS14;RPS16;UBB;CFL1;COX3;RPS3;COX1;RPL15;RPL18;RPS12;CAP1;RPS8;APLP2;PABPC4;EEF2;RHOA;MYL6;RPL27A;CYTB;ND2;GAPDH;ND5;EIF4G2;TPT1;ND4
Hypotensive episode C0520541 rat GSE2401 sample 388	35/261	1.52029e-34	3.95275e-33	0	0	27.6354	2151.94	CD63;HSP90AB1;CD81;YWHAB;SDC2;RPL11;ENO1;YBX1;OAZ1;ACTB;CHCHD2;RPS16;CFL1;PSAP;SPP1;COX2;COX1;RPL18;B2M;CTSD;SERF2;HSP90AA1;MSN;EEF2;CANX;TAGLN2;ND1;CALR;CYTB;FAU;PFN1;ND3;ND2;CALM2;TPT1
Overexertion C0161750 human GSE3606 sample 286	37/314	2.03201e-34	5.10711e-33	0	0	24.214	1878.49	RPL5;RPL30;RPL32;CD81;RPL31;SLC20A1;RPLP1;RPL11;DBI;ATP5G3;YBX1;ATP5L;RPS4X;CHCHD2;RPS16;RPS19;RPS18;RPS3;RPLP2;RPL38;RPL37;RPL15;RPL18;RPS27A;TMSB10;SERF2;FCER1G;RPS8;RPL23;RPS6;RPL27A;CHI3L1;RPL27;FAU;PFN1;RPS21;PFDN5
Familial combined hyperlipidaemia C0020474 human GSE1010 sample 137	39/374	3.16838e-34	7.70632e-33	0	0	21.4385	1653.65	RPL5;CDKN1A;RPL32;RPLP1;RPL11;DBI;YBX1;OAZ1;ACTB;ATP5L;CHCHD2;RPS16;RPS18;FTH1;PRDX1;CFL1;UBC;RPL38;SH3BGRL3;RPL37;TIMP1;RPL15;RPS11;RPL18;TMSB10;SRGN;RPS6;HLA-B;MSN;RHOA;ARPC2;RPL27A;S100A6;S100A4;PFN1;RPS21;CALM2;GAPDH;RPS24
bronchopulmonary dysplasia UMLS CUI-C0006287 human GSE8586 sample 919	36/295	4.9532e-34	1.1671e-32	0	0	24.9887	1916.33	HSP90AB1;CXCL8;BTG1;CD81;SDC2;YBX1;ACTB;ACTG1;LASP1;FTH1;UBC;COX1;TIMP1;TMSB10;B2M;IER3;RPS12;CAP1;SRGN;ACTN1;HLA-B;LAPTM5;ACTN4;HLA-A;EEF2;HSPG2;RHOA;RAB31;ARPC2;RPL27A;RPL37A;MALAT1;PLIN2;GAPDH;TPT1;FTL
HIV - Human immunodeficiency virus infection C0019693 human GSE2171 sample 40	33/226	8.06811e-34	1.84344e-32	0	0	30.0169	2287.29	RPL30;CDKN1A;HSP90AB1;BTG1;RPL32;RPLP1;OAZ1;RPS14;FTH1;PSAP;RPLP2;TIMP1;RPS11;RPL18;IER3;RPS12;SRGN;HSP90AA1;FCER1G;ACTN1;APLP2;RPS6;PLAUR;LAPTM5;EEF2;DUSP6;TYROBP;RPL37A;TAGLN2;RPL27;PLIN2;RPS21;TPT1
asthma DOID-2841 human GSE16032 sample 729	36/303	1.32175e-33	2.93118e-32	0	0	24.2301	1834.37	CD63;GRN;CXCL8;BTG1;ATP6;OAZ1;ACTB;UQCRH;ACTG1;FTH1;PRDX1;UBC;PSAP;COX2;COX1;TIMP1;B2M;IER3;CAP1;SRGN;FCER1G;LAPTM5;RHOA;MYL6;RAB31;TYROBP;PPT1;S100A4;TAGLN2;ND3;SMAP2;ND2;CALM2;GAPDH;ND4;FTL
Scleroderma C0011644 human GSE1724 sample 155	31/189	2.08725e-33	4.49654e-32	0	0	33.9	2550.96	CXCL8;CD81;RPL31;RPLP1;RPL11;ACTB;ACTG1;RPS4X;RPS14;RPS19;RPS18;FTH1;UBC;PSAP;RPS3;RPL38;TIMP1;RPS27A;PHLDA1;IER3;RPS12;RPS8;HMGA1;EEF2;RPL27A;RPL27;FAU;SQSTM1;RPS24;TPT1;FTL
Sjogren's syndrome DOID-12894 human GSE23117 sample 888	39/393	2.19439e-33	4.59602e-32	0	0	20.2681	1524.15	CD63;GRN;CD81;RPLP1;RPL11;DBI;ATP5G3;YBX1;UQCRH;CHCHD2;TUBA1B;RPS16;RPS19;RPS18;FTH1;PRDX1;PSAP;COX3;RPS3;COX2;RPLP2;TIMP1;RPL18;HSP90AA1;RPS8;RPL23;RPS6;RPL35A;EEF2;TAGLN2;FAU;PFN1;UBA52;ND2;RPS21;PFDN5;GAPDH;RPS24;FTL
myotonic dystrophy type 1 DOID-11722 human GSE7177 sample 1053	35/284	3.15649e-33	6.43241e-32	0	0	25.0533	1874.89	CD63;RPL30;CDKN1A;RPL32;CD81;RPL31;RPL11;OAZ1;ACTB;UQCRH;LASP1;TUBA1B;RPS19;RPS18;UBC;COX2;RPL38;COX1;RPS11;TMSB10;IER3;RPS12;CAP1;ACTN1;RPL23;EEF2;RPL27A;RPL37A;FAU;ND3;UBA52;PFDN5;GAPDH;RPS24;ND4
autism spectrum disorder DOID-0060041 human GSE25507 sample 1031	35/285	3.57893e-33	7.10136e-32	0	0	24.9518	1864.16	RPL30;HSP90AB1;RPL32;RPL31;YBX1;ACTB;ACTG1;ATP5L;RPS4X;RPS16;RPS19;RPS18;PSAP;RPS3;RPL38;RPL15;RPS11;RPL18;RPS12;RPL23;PABPC4;RPS6;HLA-B;RPL35A;HLA-A;EEF2;MMP9;RPL37A;FAU;ND3;UBA52;RPS21;GAPDH;RPS24;TPT1
Hepatitis C infection C0019196 human GSE2067 sample 309	31/197	8.07117e-33	1.56043e-31	0	0	32.2532	2383.41	HSP90AB1;RPL32;RPL11;ENO1;ATP5G3;UQCRH;ACTG1;RPS16;RPS19;RPS18;PRDX1;UBC;RPS3;RPLP2;RPL38;RPS11;RPL18;IER3;CAP1;GDF15;CCL20;ACTN1;RPL23;RPS6;RPL35A;RPL27A;RPL37A;RPL27;UBA52;GAPDH;FTL
cystic fibrosis DOID-1485 human GSE15568 sample 833	36/322	1.21701e-32	2.29406e-31	0	0	22.5984	1660.68	RPL5;CD63;RPL30;RPL32;RPLP1;RPL11;ATP5G3;UQCRH;ATP5L;RPS4X;RPS14;RPS16;RPS18;FTH1;RPS3;RPL38;RPL37;RPL15;RPL18;RPS27A;B2M;RPS8;RPS6;EEF2;MYL6;RPL27A;RPL37A;S100A4;RPL27;UBA52;RPS21;CALM2;PFDN5;RPS24;TPT1;FTL
[truncated: 714 more rows]

## Sheet: Disease Perturbations from GEO up
Term	Overlap	P-value	Adjusted P-value	Old P-value	Old Adjusted P-value	Odds Ratio	Combined Score	Genes
[truncated: 796 more rows]

## Sheet: DAVID, GAD_DISEASE
Category	Term	Count	%	PValue	Genes	List Total	Pop Hits	Pop Total	Fold Enrichment	Bonferroni	Benjamini	FDR
[truncated: 474 more rows]

## Sheet: DAVID, GAD_DISEASE_CLASS
Category	Term	Count	%	PValue	Genes	List Total	Pop Hits	Pop Total	Fold Enrichment	Bonferroni	Benjamini	FDR
[truncated: 13 more rows]

[truncated: 2 more sheets: DrugMatrix, g pfofiler]
