# Supplementary material for: A tensor decomposition-based integrated analysis applicable to multiple gene expression profiles without sample matching
Source: Research Square preprint supplement (doi:10.21203/rs.3.rs-766884/v1), 2021-08-02
Supplement: Supplementary file 3 [file ec40813d5c686e569d160286.xlsx]

## Sheet: ensembl gene
1	ENSG00000002834
2	ENSG00000006125
3	ENSG00000007168
4	ENSG00000008394
5	ENSG00000008988
6	ENSG00000009307
7	ENSG00000010404
8	ENSG00000011422
9	ENSG00000015479
10	ENSG00000018189
11	ENSG00000026025
12	ENSG00000034510
13	ENSG00000044574
14	ENSG00000046653
15	ENSG00000047849
16	ENSG00000052802
17	ENSG00000053438
18	ENSG00000054523
19	ENSG00000054793
20	ENSG00000063046
21	ENSG00000063177
22	ENSG00000065978
23	ENSG00000067225
24	ENSG00000067560
25	ENSG00000067715
26	ENSG00000067840
27	ENSG00000069275
28	ENSG00000070087
29	ENSG00000070756
30	ENSG00000071054
31	ENSG00000071082
32	ENSG00000071462
33	ENSG00000071575
34	ENSG00000072832
35	ENSG00000074800
36	ENSG00000075340
37	ENSG00000075618
38	ENSG00000075624
39	ENSG00000077097
40	ENSG00000077279
41	ENSG00000078018
42	ENSG00000078369
43	ENSG00000078814
44	ENSG00000079246
45	ENSG00000079459
46	ENSG00000080824
47	ENSG00000083845
48	ENSG00000084070
49	ENSG00000084073
50	ENSG00000084207
51	ENSG00000084234
52	ENSG00000084731
53	ENSG00000086061
54	ENSG00000087086
55	ENSG00000087460
56	ENSG00000088247
57	ENSG00000089009
58	ENSG00000089157
59	ENSG00000089220
60	ENSG00000089280
61	ENSG00000090621
62	ENSG00000092199
63	ENSG00000092841
64	ENSG00000092964
65	ENSG00000094916
66	ENSG00000096384
67	ENSG00000099194
68	ENSG00000099622
69	ENSG00000100097
70	ENSG00000100167
71	ENSG00000100201
72	ENSG00000100316
73	ENSG00000100320
74	ENSG00000100985
75	ENSG00000101210
76	ENSG00000101856
77	ENSG00000102003
78	ENSG00000102109
79	ENSG00000102226
80	ENSG00000102265
81	ENSG00000102804
82	ENSG00000103034
83	ENSG00000103363
84	ENSG00000104435
85	ENSG00000104549
86	ENSG00000104722
87	ENSG00000104904
88	ENSG00000105193
89	ENSG00000105223
90	ENSG00000105290
91	ENSG00000105323
92	ENSG00000105372
93	ENSG00000105409
94	ENSG00000105426
95	ENSG00000105568
96	ENSG00000105640
97	ENSG00000105894
98	ENSG00000106153
99	ENSG00000106278
100	ENSG00000108001
101	ENSG00000108107
102	ENSG00000108175
103	ENSG00000108298
104	ENSG00000108654
105	ENSG00000108828
106	ENSG00000108946
107	ENSG00000108953
108	ENSG00000109472
109	ENSG00000109475
110	ENSG00000109654
111	ENSG00000109971
112	ENSG00000110076
113	ENSG00000110321
114	ENSG00000110651
115	ENSG00000110700
116	ENSG00000110955
117	ENSG00000111371
118	ENSG00000111640
119	ENSG00000111642
120	ENSG00000111669
121	ENSG00000111674
122	ENSG00000111676
123	ENSG00000111716
124	ENSG00000111775
125	ENSG00000111897
126	ENSG00000112306
127	ENSG00000112531
128	ENSG00000112972
129	ENSG00000113140
130	ENSG00000113161
131	ENSG00000113558
132	ENSG00000113648
133	ENSG00000113657
134	ENSG00000113758
135	ENSG00000114391
136	ENSG00000114554
137	ENSG00000115009
138	ENSG00000115053
139	ENSG00000115266
140	ENSG00000115268
141	ENSG00000115306
142	ENSG00000115310
143	ENSG00000115457
144	ENSG00000116133
145	ENSG00000116251
146	ENSG00000116560
147	ENSG00000116729
148	ENSG00000116852
149	ENSG00000116871
150	ENSG00000117016
151	ENSG00000117450
152	ENSG00000117519
153	ENSG00000117592
154	ENSG00000117632
155	ENSG00000117984
156	ENSG00000118181
157	ENSG00000118271
158	ENSG00000118785
159	ENSG00000118816
160	ENSG00000119335
161	ENSG00000120885
162	ENSG00000121774
163	ENSG00000122026
164	ENSG00000122406
165	ENSG00000122566
166	ENSG00000123349
167	ENSG00000123384
168	ENSG00000123416
169	ENSG00000124172
170	ENSG00000124422
171	ENSG00000124614
172	ENSG00000124762
173	ENSG00000124766
174	ENSG00000125148
175	ENSG00000125538
176	ENSG00000125691
177	ENSG00000126214
178	ENSG00000126709
179	ENSG00000127022
180	ENSG00000127616
181	ENSG00000128564
182	ENSG00000128739
183	ENSG00000128872
184	ENSG00000129351
185	ENSG00000129951
186	ENSG00000130255
187	ENSG00000130294
188	ENSG00000130402
189	ENSG00000130522
190	ENSG00000130723
191	ENSG00000130726
192	ENSG00000130985
193	ENSG00000131095
194	ENSG00000131143
195	ENSG00000131236
196	ENSG00000131238
197	ENSG00000131469
198	ENSG00000131473
199	ENSG00000131507
200	ENSG00000131584
201	ENSG00000131711
202	ENSG00000131747
203	ENSG00000132341
204	ENSG00000132475
205	ENSG00000132688
206	ENSG00000132718
207	ENSG00000132872
208	ENSG00000133048
209	ENSG00000133112
210	ENSG00000133114
211	ENSG00000133318
212	ENSG00000133639
213	ENSG00000133872
214	ENSG00000134308
215	ENSG00000134313
216	ENSG00000134419
217	ENSG00000134824
218	ENSG00000134986
219	ENSG00000135387
220	ENSG00000135404
221	ENSG00000135406
222	ENSG00000135486
223	ENSG00000136167
224	ENSG00000136193
225	ENSG00000136295
226	ENSG00000136485
227	ENSG00000136689
228	ENSG00000136854
229	ENSG00000136942
230	ENSG00000137154
231	ENSG00000137267
232	ENSG00000137285
233	ENSG00000137309
234	ENSG00000137331
235	ENSG00000137726
236	ENSG00000137818
237	ENSG00000137942
238	ENSG00000138071
239	ENSG00000138326
240	ENSG00000138668
241	ENSG00000138758
242	ENSG00000139289
243	ENSG00000139318
244	ENSG00000139644
245	ENSG00000139970
246	ENSG00000140264
247	ENSG00000140988
248	ENSG00000141367
249	ENSG00000141934
250	ENSG00000142089
251	ENSG00000142192
252	ENSG00000142534
253	ENSG00000142541
254	ENSG00000142669
255	ENSG00000142676
256	ENSG00000142798
257	ENSG00000142864
258	ENSG00000142937
259	ENSG00000143126
260	ENSG00000143321
261	ENSG00000143324
262	ENSG00000143333
263	ENSG00000143384
264	ENSG00000143761
265	ENSG00000143933
266	ENSG00000143947
267	ENSG00000144028
268	ENSG00000144161
269	ENSG00000144713
270	ENSG00000145362
271	ENSG00000145425
272	ENSG00000145592
273	ENSG00000147065
274	ENSG00000147140
275	ENSG00000147274
276	ENSG00000147403
277	ENSG00000147604
278	ENSG00000147649
279	ENSG00000147872
280	ENSG00000148303
281	ENSG00000148798
282	ENSG00000149273
283	ENSG00000149294
284	ENSG00000149485
285	ENSG00000149806
286	ENSG00000149925
287	ENSG00000150625
288	ENSG00000150991
289	ENSG00000152234
290	ENSG00000152795
291	ENSG00000152932
292	ENSG00000153187
293	ENSG00000154277
294	ENSG00000154473
295	ENSG00000154917
296	ENSG00000155368
297	ENSG00000155980
298	ENSG00000156482
299	ENSG00000156508
300	ENSG00000156976
301	ENSG00000157064
302	ENSG00000157227
303	ENSG00000157734
304	ENSG00000157851
305	ENSG00000158710
306	ENSG00000159164
307	ENSG00000159335
308	ENSG00000159409
309	ENSG00000160014
310	ENSG00000160255
311	ENSG00000160285
312	ENSG00000161011
313	ENSG00000161016
314	ENSG00000161203
315	ENSG00000161970
316	ENSG00000162244
317	ENSG00000162511
318	ENSG00000162512
319	ENSG00000162706
320	ENSG00000162734
321	ENSG00000163041
322	ENSG00000163466
323	ENSG00000163539
324	ENSG00000163682
325	ENSG00000164091
326	ENSG00000164111
327	ENSG00000164405
328	ENSG00000164434
329	ENSG00000164587
330	ENSG00000164687
331	ENSG00000164754
332	ENSG00000164919
333	ENSG00000164924
334	ENSG00000165119
335	ENSG00000165434
336	ENSG00000166165
337	ENSG00000166441
338	ENSG00000166598
339	ENSG00000166710
340	ENSG00000166848
341	ENSG00000166913
342	ENSG00000166974
343	ENSG00000167178
344	ENSG00000167283
345	ENSG00000167508
346	ENSG00000167526
347	ENSG00000167552
348	ENSG00000167614
349	ENSG00000167654
350	ENSG00000167658
351	ENSG00000167978
352	ENSG00000167996
353	ENSG00000168028
354	ENSG00000168036
355	ENSG00000168280
356	ENSG00000168385
357	ENSG00000168461
358	ENSG00000168824
359	ENSG00000169045
360	ENSG00000169100
361	ENSG00000169245
362	ENSG00000169306
363	ENSG00000169429
364	ENSG00000169439
365	ENSG00000169710
366	ENSG00000169752
367	ENSG00000170004
368	ENSG00000170017
369	ENSG00000170027
370	ENSG00000170091
371	ENSG00000170144
372	ENSG00000170315
373	ENSG00000170558
374	ENSG00000170889
375	ENSG00000170961
376	ENSG00000171033
377	ENSG00000171533
378	ENSG00000171603
379	ENSG00000171617
380	ENSG00000171724
381	ENSG00000171843
382	ENSG00000171858
383	ENSG00000171863
384	ENSG00000172020
385	ENSG00000172201
386	ENSG00000172757
387	ENSG00000172809
388	ENSG00000173267
389	ENSG00000173660
390	ENSG00000173812
391	ENSG00000174231
392	ENSG00000174437
393	ENSG00000174444
394	ENSG00000174721
395	ENSG00000174748
396	ENSG00000174938
397	ENSG00000175061
398	ENSG00000175130
399	ENSG00000175745
400	ENSG00000176749
401	ENSG00000176788
402	ENSG00000176887
403	ENSG00000177600
404	ENSG00000177733
405	ENSG00000177954
406	ENSG00000178403
407	ENSG00000179010
408	ENSG00000179218
409	ENSG00000179222
410	ENSG00000181163
411	ENSG00000181350
412	ENSG00000181449
413	ENSG00000181722
414	ENSG00000182095
415	ENSG00000182272
416	ENSG00000182670
417	ENSG00000182768
418	ENSG00000182774
419	ENSG00000182899
420	ENSG00000182985
421	ENSG00000184009
422	ENSG00000184897
423	ENSG00000185215
424	ENSG00000185551
425	ENSG00000185630
426	ENSG00000185787
427	ENSG00000186468
428	ENSG00000186469
429	ENSG00000186868
430	ENSG00000187109
431	ENSG00000187514
432	ENSG00000187957
433	ENSG00000188157
434	ENSG00000188322
435	ENSG00000188846
436	ENSG00000189043
437	ENSG00000189060
438	ENSG00000189159
439	ENSG00000189403
440	ENSG00000196154
441	ENSG00000196230
442	ENSG00000196262
443	ENSG00000196361
444	ENSG00000196405
445	ENSG00000196531
446	ENSG00000196924
447	ENSG00000197102
448	ENSG00000197457
449	ENSG00000197535
450	ENSG00000197694
451	ENSG00000197746
452	ENSG00000197756
453	ENSG00000197956
454	ENSG00000197958
455	ENSG00000198034
456	ENSG00000198242
457	ENSG00000198408
458	ENSG00000198586
459	ENSG00000198668
460	ENSG00000198695
461	ENSG00000198712
462	ENSG00000198727
463	ENSG00000198755
464	ENSG00000198763
465	ENSG00000198786
466	ENSG00000198791
467	ENSG00000198804
468	ENSG00000198830
469	ENSG00000198840
470	ENSG00000198886
471	ENSG00000198888
472	ENSG00000198899
473	ENSG00000198910
474	ENSG00000198911
475	ENSG00000198918
476	ENSG00000198938
477	ENSG00000198961
478	ENSG00000203879
479	ENSG00000204463
480	ENSG00000204469
481	ENSG00000204580
482	ENSG00000204628
483	ENSG00000204843
484	ENSG00000205336
485	ENSG00000205542
486	ENSG00000205922
487	ENSG00000206503
488	ENSG00000210082
489	ENSG00000211459
490	ENSG00000212907
491	ENSG00000213190
492	ENSG00000213420
493	ENSG00000213639
494	ENSG00000213741
495	ENSG00000213889
496	ENSG00000213923
497	ENSG00000215878
498	ENSG00000220205
499	ENSG00000221983
500	ENSG00000223551
501	ENSG00000225630
502	ENSG00000225783
503	ENSG00000225840
504	ENSG00000225972
505	ENSG00000227051
506	ENSG00000228253
507	ENSG00000228474
508	ENSG00000229117
509	ENSG00000229344
510	ENSG00000231500
511	ENSG00000231764
512	ENSG00000232112
513	ENSG00000232573
514	ENSG00000233927
515	ENSG00000234745
516	ENSG00000235552
517	ENSG00000237973
518	ENSG00000241343
519	ENSG00000241697
520	ENSG00000242265
521	ENSG00000248527
522	ENSG00000249072
523	ENSG00000251562
524	ENSG00000254772
525	ENSG00000255508
526	ENSG00000255823
527	ENSG00000256045
528	ENSG00000256338
529	ENSG00000256618
530	ENSG00000258947
531	ENSG00000260032
532	ENSG00000262902
533	ENSG00000264364
534	ENSG00000265681
535	ENSG00000269028
536	ENSG00000270672
537	ENSG00000270800
538	ENSG00000272031
539	ENSG00000272325
540	ENSG00000272398
541	ENSG00000274012
542	ENSG00000276293
543	ENSG00000277443
544	ENSG00000277586

## Sheet: gene symbol
From	To	Species	Gene Name
ENSG00000144161	ZC3H8	Homo sapiens	zinc finger CCCH-type containing 8(ZC3H8)
ENSG00000113657	DPYSL3	Homo sapiens	dihydropyrimidinase like 3(DPYSL3)
ENSG00000162706	CADM3	Homo sapiens	cell adhesion molecule 3(CADM3)
ENSG00000167283	ATP5L	Homo sapiens	ATP synthase, H+ transporting, mitochondrial Fo complex subunit G(ATP5L)
ENSG00000009307	CSDE1	Homo sapiens	cold shock domain containing E1(CSDE1)
ENSG00000034510	TMSB10	Homo sapiens	thymosin beta 10(TMSB10)
ENSG00000123349	PFDN5	Homo sapiens	prefoldin subunit 5(PFDN5)
ENSG00000169100	SLC25A6	Homo sapiens	solute carrier family 25 member 6(SLC25A6)
ENSG00000089220	PEBP1	Homo sapiens	phosphatidylethanolamine binding protein 1(PEBP1)
ENSG00000067560	RHOA	Homo sapiens	ras homolog family member A(RHOA)
ENSG00000159409	CELF3	Homo sapiens	CUGBP, Elav-like family member 3(CELF3)
ENSG00000113648	h2afy	Homo sapiens	H2A histone family member Y(H2AFY)
ENSG00000181350	LRRC75A	Homo sapiens	leucine rich repeat containing 75A(LRRC75A)
ENSG00000189060	H1F0	Homo sapiens	H1 histone family member 0(H1F0)
ENSG00000131095	GFAP	Homo sapiens	glial fibrillary acidic protein(GFAP)
ENSG00000157227	MMP14	Homo sapiens	matrix metallopeptidase 14(MMP14)
ENSG00000168028	RPSA	Homo sapiens	ribosomal protein SA(RPSA)
ENSG00000174938	SEZ6L2	Homo sapiens	seizure related 6 homolog like 2(SEZ6L2)
ENSG00000172757	CFL1	Homo sapiens	cofilin 1(CFL1)
ENSG00000125538	IL1B	Homo sapiens	interleukin 1 beta(IL1B)
ENSG00000167178	ISLR2	Homo sapiens	immunoglobulin superfamily containing leucine rich repeat 2(ISLR2)
ENSG00000088247	MIR3940	Homo sapiens	microRNA 3940(MIR3940)
ENSG00000168385	SEPT2	Homo sapiens	septin 2(SEPT2)
ENSG00000182670	TTC3	Homo sapiens	tetratricopeptide repeat domain 3(TTC3)
ENSG00000145362	ANK2	Homo sapiens	ankyrin 2(ANK2)
ENSG00000108298	RPL19	Homo sapiens	ribosomal protein L19(RPL19)
ENSG00000108175	ZMIZ1	Homo sapiens	zinc finger MIZ-type containing 1(ZMIZ1)
ENSG00000094916	MIR3198-2	Homo sapiens	microRNA 3198-2(MIR3198-2)
ENSG00000122026	RPL21	Homo sapiens	ribosomal protein L21(RPL21)
ENSG00000086061	DNAJA1	Homo sapiens	DnaJ heat shock protein family (Hsp40) member A1(DNAJA1)
ENSG00000260032	NORAD	Homo sapiens	non-coding RNA activated by DNA damage(NORAD)
ENSG00000137726	FXYD6	Homo sapiens	FXYD domain containing ion transport regulator 6(FXYD6)
ENSG00000104722	NEFM	Homo sapiens	neurofilament, medium polypeptide(NEFM)
ENSG00000145592	RPL37	Homo sapiens	ribosomal protein L37(RPL37)
ENSG00000044574	HSPA5	Homo sapiens	heat shock protein family A (Hsp70) member 5(HSPA5)
ENSG00000113558	SKP1	Homo sapiens	S-phase kinase associated protein 1(SKP1)
ENSG00000047849	MAP4	Homo sapiens	microtubule associated protein 4(MAP4)
ENSG00000197956	S100A6	Homo sapiens	S100 calcium binding protein A6(S100A6)
ENSG00000198804	COX1	Homo sapiens	cytochrome c oxidase subunit I(COX1)
ENSG00000144028	SNRNP200	Homo sapiens	small nuclear ribonucleoprotein U5 subunit 200(SNRNP200)
ENSG00000198918	RPL39	Homo sapiens	ribosomal protein L39(RPL39)
ENSG00000142089	IFITM3	Homo sapiens	interferon induced transmembrane protein 3(IFITM3)
ENSG00000111371	SLC38A1	Homo sapiens	solute carrier family 38 member 1(SLC38A1)
ENSG00000168036	CTNNB1	Homo sapiens	catenin beta 1(CTNNB1)
ENSG00000169245	CXCL10	Homo sapiens	C-X-C motif chemokine ligand 10(CXCL10)
ENSG00000156482	RPL30	Homo sapiens	ribosomal protein L30(RPL30)
ENSG00000092964	DPYSL2	Homo sapiens	dihydropyrimidinase like 2(DPYSL2)
ENSG00000063177	RPL18	Homo sapiens	ribosomal protein L18(RPL18)
ENSG00000162734	PEA15	Homo sapiens	phosphoprotein enriched in astrocytes 15(PEA15)
ENSG00000251562	MALAT1	Homo sapiens	metastasis associated lung adenocarcinoma transcript 1 (non-protein coding)(MALAT1)
ENSG00000101210	EEF1A2	Homo sapiens	eukaryotic translation elongation factor 1 alpha 2(EEF1A2)
ENSG00000164919	COX6C	Homo sapiens	cytochrome c oxidase subunit 6C(COX6C)
ENSG00000092841	MYL6	Homo sapiens	myosin light chain 6(MYL6)
ENSG00000174721	FGFBP3	Homo sapiens	fibroblast growth factor binding protein 3(FGFBP3)
ENSG00000142192	APP	Homo sapiens	amyloid beta precursor protein(APP)
ENSG00000198910	L1CAM	Homo sapiens	L1 cell adhesion molecule(L1CAM)
ENSG00000170004	CHD3	Homo sapiens	chromodomain helicase DNA binding protein 3(CHD3)
ENSG00000168280	KIF5C	Homo sapiens	kinesin family member 5C(KIF5C)
ENSG00000006125	AP2B1	Homo sapiens	adaptor related protein complex 2 beta 1 subunit(AP2B1)
ENSG00000198911	SREBF2	Homo sapiens	sterol regulatory element binding transcription factor 2(SREBF2)
ENSG00000147649	MTDH	Homo sapiens	metadherin(MTDH)
ENSG00000124422	USP22	Homo sapiens	ubiquitin specific peptidase 22(USP22)
ENSG00000164924	YWHAZ	Homo sapiens	tyrosine 3-monooxygenase/tryptophan 5-monooxygenase activation protein zeta(YWHAZ)
ENSG00000147403	RPL10	Homo sapiens	ribosomal protein L10(RPL10)
ENSG00000011422	PLAUR	Homo sapiens	plasminogen activator, urokinase receptor(PLAUR)
ENSG00000135406	PRPH	Homo sapiens	peripherin(PRPH)
ENSG00000046653	GPM6B	Homo sapiens	glycoprotein M6B(GPM6B)
ENSG00000135404	CD63	Homo sapiens	CD63 molecule(CD63)
ENSG00000018189	RUFY3	Homo sapiens	RUN and FYVE domain containing 3(RUFY3)
ENSG00000269028	MTRNR2L2	Homo sapiens	MT-RNR2-like 2(MTRNR2L2)
ENSG00000077279	DCX	Homo sapiens	doublecortin(DCX)
ENSG00000111674	ENO2	Homo sapiens	enolase 2(ENO2)
ENSG00000137942	FNBP1L	Homo sapiens	formin binding protein 1 like(FNBP1L)
ENSG00000111676	ATN1	Homo sapiens	atrophin 1(ATN1)
ENSG00000104904	OAZ1	Homo sapiens	ornithine decarboxylase antizyme 1(OAZ1)
ENSG00000134313	KIDINS220	Homo sapiens	kinase D-interacting substrate 220kDa(KIDINS220)
ENSG00000136854	STXBP1	Homo sapiens	syntaxin binding protein 1(STXBP1)
ENSG00000170017	ALCAM	Homo sapiens	activated leukocyte cell adhesion molecule(ALCAM)
ENSG00000196405	EVL	Homo sapiens	Enah/Vasp-like(EVL)
ENSG00000198938	COX3	Homo sapiens	cytochrome c oxidase III(COX3)
ENSG00000147872	PLIN2	Homo sapiens	perilipin 2(PLIN2)
ENSG00000162512	SDC3	Homo sapiens	syndecan 3(SDC3)
ENSG00000109475	RPL34	Homo sapiens	ribosomal protein L34(RPL34)
ENSG00000185630	PBX1	Homo sapiens	PBX homeobox 1(PBX1)
ENSG00000109472	CPE	Homo sapiens	carboxypeptidase E(CPE)
ENSG00000272325	NUDT3	Homo sapiens	nudix hydrolase 3(NUDT3)
ENSG00000070756	MIR7705	Homo sapiens	microRNA 7705(MIR7705)
ENSG00000087086	FTL	Homo sapiens	ferritin light chain(FTL)
ENSG00000162511	LAPTM5	Homo sapiens	lysosomal protein transmembrane 5(LAPTM5)
ENSG00000155368	DBI	Homo sapiens	diazepam binding inhibitor, acyl-CoA binding protein(DBI)
ENSG00000153187	HNRNPU	Homo sapiens	heterogeneous nuclear ribonucleoprotein U(HNRNPU)
ENSG00000072832	CRMP1	Homo sapiens	collapsin response mediator protein 1(CRMP1)
ENSG00000154277	UCHL1	Homo sapiens	ubiquitin C-terminal hydrolase L1(UCHL1)
ENSG00000078018	MAP2	Homo sapiens	microtubule associated protein 2(MAP2)
ENSG00000111669	TPI1	Homo sapiens	triosephosphate isomerase 1(TPI1)
ENSG00000172201	ID4	Homo sapiens	inhibitor of DNA binding 4, HLH protein(ID4)
ENSG00000170144	MIR4444-1	Homo sapiens	microRNA 4444-1(MIR4444-1)
ENSG00000204463	BAG6	Homo sapiens	BCL2 associated athanogene 6(BAG6)
ENSG00000133114	GPALPP1	Homo sapiens	GPALPP motifs containing 1(GPALPP1)
ENSG00000133112	TPT1	Homo sapiens	tumor protein, translationally-controlled 1(TPT1)
ENSG00000170027	YWHAG	Homo sapiens	tyrosine 3-monooxygenase/tryptophan 5-monooxygenase activation protein gamma(YWHAG)
ENSG00000204580	MIR4640	Homo sapiens	microRNA 4640(MIR4640)
ENSG00000149806	FAU	Homo sapiens	FAU, ubiquitin like and ribosomal protein S30 fusion(FAU)
ENSG00000197958	RPL12	Homo sapiens	ribosomal protein L12(RPL12)
ENSG00000204469	PRRC2A	Homo sapiens	proline rich coiled-coil 2A(PRRC2A)
ENSG00000149925	ALDOA	Homo sapiens	aldolase, fructose-bisphosphate A(ALDOA)
ENSG00000126709	IFI6	Homo sapiens	interferon alpha inducible protein 6(IFI6)
ENSG00000078369	GNB1	Homo sapiens	G protein subunit beta 1(GNB1)
ENSG00000079459	FDFT1	Homo sapiens	farnesyl-diphosphate farnesyltransferase 1(FDFT1)
ENSG00000143384	MCL1	Homo sapiens	BCL2 family apoptosis regulator(MCL1)
ENSG00000124766	SOX4	Homo sapiens	SRY-box 4(SOX4)
ENSG00000184897	H1FX	Homo sapiens	H1 histone family member X(H1FX)
ENSG00000124762	CDKN1A	Homo sapiens	cyclin dependent kinase inhibitor 1A(CDKN1A)
ENSG00000173660	Uqcrh	Homo sapiens	ubiquinol-cytochrome c reductase hinge protein(UQCRH)
ENSG00000113758	DBN1	Homo sapiens	drebrin 1(DBN1)
ENSG00000198840	ND3	Homo sapiens	NADH dehydrogenase, subunit 3 (complex I)(ND3)
ENSG00000198961	PJA2	Homo sapiens	praja ring finger ubiquitin ligase 2(PJA2)
ENSG00000112306	RPS12	Homo sapiens	ribosomal protein S12(RPS12)
ENSG00000134419	rps15a	Homo sapiens	ribosomal protein S15a(RPS15A)
ENSG00000181163	NPM1	Homo sapiens	nucleophosmin(NPM1)
ENSG00000130294	KIF1A	Homo sapiens	kinesin family member 1A(KIF1A)
ENSG00000205542	TMSB4X	Homo sapiens	thymosin beta 4, X-linked(TMSB4X)
ENSG00000197756	RPL37A	Homo sapiens	ribosomal protein L37a(RPL37A)
ENSG00000132475	MIR4738	Homo sapiens	microRNA 4738(MIR4738)
ENSG00000131143	Cox4I1	Homo sapiens	cytochrome c oxidase subunit 4I1(COX4I1)
ENSG00000198727	CYTB	Homo sapiens	cytochrome b(CYTB)
ENSG00000174748	RPL15	Homo sapiens	ribosomal protein L15(RPL15)
ENSG00000124614	RPS10	Homo sapiens	ribosomal protein S10(RPS10)
ENSG00000089009	RPL6	Homo sapiens	ribosomal protein L6(RPL6)
ENSG00000169045	HNRNPH1	Homo sapiens	heterogeneous nuclear ribonucleoprotein H1 (H)(HNRNPH1)
ENSG00000100201	DDX17	Homo sapiens	DEAD-box helicase 17(DDX17)
ENSG00000186868	MAPT	Homo sapiens	microtubule associated protein tau(MAPT)
ENSG00000187957	DNER	Homo sapiens	delta/notch like EGF repeat containing(DNER)
ENSG00000100320	RBFOX2	Homo sapiens	RNA binding protein, fox-1 homolog 2(RBFOX2)
ENSG00000161203	AP2M1	Homo sapiens	adaptor related protein complex 2 mu 1 subunit(AP2M1)
ENSG00000137818	RPLP1	Homo sapiens	ribosomal protein lateral stalk subunit P1(RPLP1)
ENSG00000118181	RPS25	Homo sapiens	ribosomal protein S25(RPS25)
ENSG00000067225	PKM	Homo sapiens	pyruvate kinase, muscle(PKM)
ENSG00000134308	YWHAQ	Homo sapiens	tyrosine 3-monooxygenase/tryptophan 5-monooxygenase activation protein theta(YWHAQ)
ENSG00000196531	NACA	Homo sapiens	nascent polypeptide-associated complex alpha subunit(NACA)
ENSG00000198830	HMGN2	Homo sapiens	high mobility group nucleosomal binding domain 2(HMGN2)
ENSG00000008988	RPS20	Homo sapiens	ribosomal protein S20(RPS20)
ENSG00000112531	QKI	Homo sapiens	QKI, KH domain containing RNA binding(QKI)
ENSG00000198712	COX2	Homo sapiens	cytochrome c oxidase subunit II(COX2)
ENSG00000197746	PSAP	Homo sapiens	prosaposin(PSAP)
ENSG00000143126	CELSR2	Homo sapiens	cadherin EGF LAG seven-pass G-type receptor 2(CELSR2)
ENSG00000145425	RPS3A	Homo sapiens	ribosomal protein S3A(RPS3A)
ENSG00000147604	RPL7	Homo sapiens	ribosomal protein L7(RPL7)
ENSG00000100316	RPL3	Homo sapiens	ribosomal protein L3(RPL3)
ENSG00000206503	hla-a	Homo sapiens	major histocompatibility complex, class I, A(HLA-A)
ENSG00000123416	TUBA1B	Homo sapiens	tubulin alpha 1b(TUBA1B)
ENSG00000122566	HNRNPA2B1	Homo sapiens	heterogeneous nuclear ribonucleoprotein A2/B1(HNRNPA2B1)
ENSG00000108107	MIR6805	Homo sapiens	microRNA 6805(MIR6805)
ENSG00000074800	ENO1	Homo sapiens	enolase 1(ENO1)
ENSG00000213420	GPC2	Homo sapiens	glypican 2(GPC2)
ENSG00000118271	TTR	Homo sapiens	transthyretin(TTR)
ENSG00000197535	MYO5A	Homo sapiens	myosin VA(MYO5A)
ENSG00000175745	NR2F1	Homo sapiens	nuclear receptor subfamily 2 group F member 1(NR2F1)
ENSG00000084731	KIF3C	Homo sapiens	kinesin family member 3C(KIF3C)
ENSG00000205922	ONECUT3	Homo sapiens	one cut homeobox 3(ONECUT3)
ENSG00000102804	TSC22D1	Homo sapiens	TSC22 domain family member 1(TSC22D1)
ENSG00000100985	MMP9	Homo sapiens	matrix metallopeptidase 9(MMP9)
ENSG00000185551	MIR1469	Homo sapiens	microRNA 1469(MIR1469)
ENSG00000105193	RPS16	Homo sapiens	ribosomal protein S16(RPS16)
ENSG00000166913	YWHAB	Homo sapiens	tyrosine 3-monooxygenase/tryptophan 5-monooxygenase activation protein beta(YWHAB)
ENSG00000160014	CALM3	Homo sapiens	calmodulin 3(CALM3)
ENSG00000160255	ITGB2	Homo sapiens	integrin subunit beta 2(ITGB2)
ENSG00000154473	BUB3	Homo sapiens	BUB3, mitotic checkpoint protein(BUB3)
ENSG00000133318	RTN3	Homo sapiens	reticulon 3(RTN3)
ENSG00000171033	PKIA	Homo sapiens	protein kinase (cAMP-dependent, catalytic) inhibitor alpha(PKIA)
ENSG00000110651	CD81	Homo sapiens	CD81 molecule(CD81)
ENSG00000132341	RAN	Homo sapiens	RAN, member RAS oncogene family(RAN)
ENSG00000158710	TAGLN2	Homo sapiens	transgelin 2(TAGLN2)
ENSG00000136942	RPL35	Homo sapiens	ribosomal protein L35(RPL35)
ENSG00000225783	Miat	Homo sapiens	myocardial infarction associated transcript (non-protein coding)(MIAT)
ENSG00000182272	b4galnt4	Homo sapiens	beta-1,4-N-acetyl-galactosaminyltransferase 4(B4GALNT4)
ENSG00000185787	MORF4L1	Homo sapiens	mortality factor 4 like 1(MORF4L1)
ENSG00000106153	CHCHD2	Homo sapiens	coiled-coil-helix-coiled-coil-helix domain containing 2(CHCHD2)
ENSG00000106278	PTPRZ1	Homo sapiens	protein tyrosine phosphatase, receptor type Z1(PTPRZ1)
ENSG00000157734	SNX22	Homo sapiens	sorting nexin 22(SNX22)
ENSG00000131469	RPL27	Homo sapiens	ribosomal protein L27(RPL27)
ENSG00000089280	FUS	Homo sapiens	FUS RNA binding protein(FUS)
ENSG00000163539	CLASP2	Homo sapiens	cytoplasmic linker associated protein 2(CLASP2)
ENSG00000111897	SERINC1	Homo sapiens	serine incorporator 1(SERINC1)
ENSG00000198763	ND2	Homo sapiens	MTND2(ND2)
ENSG00000198886	ND4	Homo sapiens	NADH dehydrogenase, subunit 4 (complex I)(ND4)
ENSG00000110321	EIF4G2	Homo sapiens	eukaryotic translation initiation factor 4 gamma 2(EIF4G2)
ENSG00000213889	PPM1N	Homo sapiens	protein phosphatase, Mg2+/Mn2+ dependent 1N (putative)(PPM1N)
ENSG00000111775	Cox6a1	Homo sapiens	cytochrome c oxidase subunit 6A1(COX6A1)
ENSG00000198888	ND1	Homo sapiens	NADH dehydrogenase, subunit 1 (complex I)(ND1)
ENSG00000131584	acap3	Homo sapiens	ArfGAP with coiled-coil, ankyrin repeat and PH domains 3(ACAP3)
ENSG00000157851	DPYSL5	Homo sapiens	dihydropyrimidinase like 5(DPYSL5)
ENSG00000198408	MGEA5	Homo sapiens	meningioma expressed antigen 5 (hyaluronidase)(MGEA5)
ENSG00000174437	ATP2A2	Homo sapiens	ATPase sarcoplasmic/endoplasmic reticulum Ca2+ transporting 2(ATP2A2)
ENSG00000130255	RPL36	Homo sapiens	ribosomal protein L36(RPL36)
ENSG00000079246	XRCC5	Homo sapiens	X-ray repair cross complementing 5(XRCC5)
ENSG00000101856	PGRMC1	Homo sapiens	progesterone receptor membrane component 1(PGRMC1)
ENSG00000187514	MIR1244-1	Homo sapiens	microRNA 1244-1(MIR1244-1)
ENSG00000108001	EBF3	Homo sapiens	early B-cell factor 3(EBF3)
ENSG00000185215	TNFAIP2	Homo sapiens	TNF alpha induced protein 2(TNFAIP2)
ENSG00000184009	ACTG1	Homo sapiens	actin gamma 1(ACTG1)
ENSG00000164754	MIR3610	Homo sapiens	microRNA 3610(MIR3610)
ENSG00000143333	RGS16	Homo sapiens	regulator of G-protein signaling 16(RGS16)
ENSG00000188846	RPL14	Homo sapiens	ribosomal protein L14(RPL14)
ENSG00000131236	CAP1	Homo sapiens	adenylate cyclase associated protein 1(CAP1)
ENSG00000132688	NES	Homo sapiens	nestin(NES)
ENSG00000134986	NREP	Homo sapiens	neuronal regeneration related protein(NREP)
ENSG00000131238	PPT1	Homo sapiens	palmitoyl-protein thioesterase 1(PPT1)
ENSG00000172020	GAP43	Homo sapiens	growth associated protein 43(GAP43)
ENSG00000112972	HMGCS1	Homo sapiens	3-hydroxy-3-methylglutaryl-CoA synthase 1(HMGCS1)
ENSG00000213639	ppp1cb	Homo sapiens	protein phosphatase 1 catalytic subunit beta(PPP1CB)
ENSG00000111640	GAPDH	Homo sapiens	glyceraldehyde-3-phosphate dehydrogenase(GAPDH)
ENSG00000083845	RPS5	Homo sapiens	ribosomal protein S5(RPS5)
ENSG00000174444	RPL4	Homo sapiens	ribosomal protein L4(RPL4)
ENSG00000111642	CHD4	Homo sapiens	chromodomain helicase DNA binding protein 4(CHD4)
ENSG00000198755	RPL10A	Homo sapiens	ribosomal protein L10a(RPL10A)
ENSG00000176749	CDK5R1	Homo sapiens	cyclin dependent kinase 5 regulatory subunit 1(CDK5R1)
ENSG00000131473	ACLY	Homo sapiens	ATP citrate lyase(ACLY)
ENSG00000177954	RPS27	Homo sapiens	ribosomal protein S27(RPS27)
ENSG00000143324	XPR1	Homo sapiens	xenotropic and polytropic retrovirus receptor 1(XPR1)
ENSG00000099194	SCD	Homo sapiens	stearoyl-CoA desaturase(SCD)
ENSG00000161011	SQSTM1	Homo sapiens	sequestosome 1(SQSTM1)
ENSG00000160285	LSS	Homo sapiens	lanosterol synthase (2,3-oxidosqualene-lanosterol cyclase)(LSS)
ENSG00000122406	RPL5	Homo sapiens	ribosomal protein L5(RPL5)
ENSG00000164405	Uqcrq	Homo sapiens	ubiquinol-cytochrome c reductase complex III subunit VII(UQCRQ)
ENSG00000089157	RPLP0	Homo sapiens	ribosomal protein lateral stalk subunit P0(RPLP0)
ENSG00000256045	MTRNR2L10	Homo sapiens	MT-RNR2-like 10(MTRNR2L10)
ENSG00000143321	HDGF	Homo sapiens	hepatoma-derived growth factor(HDGF)
ENSG00000161016	MIR6850	Homo sapiens	microRNA 6850(MIR6850)
ENSG00000071575	TRIB2	Homo sapiens	tribbles pseudokinase 2(TRIB2)
ENSG00000170091	HMP19	Homo sapiens	HMP19 protein(HMP19)
ENSG00000111716	LDHB	Homo sapiens	lactate dehydrogenase B(LDHB)
ENSG00000196361	ELAVL3	Homo sapiens	ELAV like RNA binding protein 3(ELAVL3)
ENSG00000197694	SPTAN1	Homo sapiens	spectrin alpha, non-erythrocytic 1(SPTAN1)
ENSG00000198786	ND5	Homo sapiens	NADH dehydrogenase, subunit 5 (complex I)(ND5)
ENSG00000156508	EEF1A1	Homo sapiens	eukaryotic translation elongation factor 1 alpha 1(EEF1A1)
ENSG00000197457	STMN3	Homo sapiens	stathmin 3(STMN3)
ENSG00000198668	CALM1	Homo sapiens	calmodulin 1(CALM1)
ENSG00000177600	RPLP2	Homo sapiens	ribosomal protein lateral stalk subunit P2(RPLP2)
ENSG00000117016	RIMS3	Homo sapiens	regulating synaptic membrane exocytosis 3(RIMS3)
ENSG00000163682	RPL9	Homo sapiens	ribosomal protein L9(RPL9)
ENSG00000139289	PHLDA1	Homo sapiens	pleckstrin homology like domain family A member 1(PHLDA1)
ENSG00000138071	ACTR2	Homo sapiens	ARP2 actin related protein 2 homolog(ACTR2)
ENSG00000166710	B2M	Homo sapiens	beta-2-microglobulin(B2M)
ENSG00000196230	TUBB	Homo sapiens	tubulin beta class I(TUBB)
ENSG00000133639	BTG1	Homo sapiens	BTG anti-proliferation factor 1(BTG1)
ENSG00000071462	WBSCR22	Homo sapiens	Williams-Beuren syndrome chromosome region 22(WBSCR22)
ENSG00000198899	ATP6	Homo sapiens	ATP synthase F0 subunit 6(ATP6)
ENSG00000177733	HNRNPA0	Homo sapiens	heterogeneous nuclear ribonucleoprotein A0(HNRNPA0)
ENSG00000156976	MIR1248	Homo sapiens	microRNA 1248(MIR1248)
ENSG00000176887	SOX11	Homo sapiens	SRY-box 11(SOX11)
ENSG00000119335	SET	Homo sapiens	SET nuclear proto-oncogene(SET)
ENSG00000133872	SARAF	Homo sapiens	store-operated calcium entry associated regulatory factor(SARAF)
ENSG00000166848	LOC105371348	Homo sapiens	uncharacterized LOC105371348(LOC105371348)
ENSG00000162244	RPL29	Homo sapiens	ribosomal protein L29(RPL29)
ENSG00000204628	RACK1	Homo sapiens	receptor for activated C kinase 1(RACK1)
ENSG00000121774	KHDRBS1	Homo sapiens	KH RNA binding domain containing, signal transduction associated 1(KHDRBS1)
ENSG00000108654	Mir3064	Homo sapiens	microRNA 3064(MIR3064)
ENSG00000141367	CLTC	Homo sapiens	clathrin heavy chain(CLTC)
ENSG00000270672	MTRNR2L6	Homo sapiens	MT-RNR2-like 6(MTRNR2L6)
ENSG00000196262	PPIA	Homo sapiens	peptidylprolyl isomerase A(PPIA)
ENSG00000174231	PRPF8	Homo sapiens	pre-mRNA processing factor 8(PRPF8)
ENSG00000173267	SNCG	Homo sapiens	synuclein gamma(SNCG)
ENSG00000077097	MIR4442	Homo sapiens	microRNA 4442(MIR4442)
ENSG00000132872	SYT4	Homo sapiens	synaptotagmin 4(SYT4)
ENSG00000140264	SERF2	Homo sapiens	small EDRK-rich factor 2(SERF2)
ENSG00000105290	APLP1	Homo sapiens	amyloid beta precursor like protein 1(APLP1)
ENSG00000186468	rps23	Homo sapiens	ribosomal protein S23(RPS23)
ENSG00000186469	GNG2	Homo sapiens	G protein subunit gamma 2(GNG2)
ENSG00000109654	TRIM2	Homo sapiens	tripartite motif containing 2(TRIM2)
ENSG00000164434	FABP7	Homo sapiens	fatty acid binding protein 7(FABP7)
ENSG00000166974	MAPRE2	Homo sapiens	microtubule associated protein RP/EB family member 2(MAPRE2)
ENSG00000163466	ARPC2	Homo sapiens	actin related protein 2/3 complex subunit 2(ARPC2)
ENSG00000052802	MSMO1	Homo sapiens	methylsterol monooxygenase 1(MSMO1)
ENSG00000134824	FADS2	Homo sapiens	fatty acid desaturase 2(FADS2)
ENSG00000198791	CNOT7	Homo sapiens	CCR4-NOT transcription complex subunit 7(CNOT7)
ENSG00000129351	ILF3	Homo sapiens	interleukin enhancer binding factor 3(ILF3)
ENSG00000155980	KIF5A	Homo sapiens	kinesin family member 5A(KIF5A)
ENSG00000197102	DYNC1H1	Homo sapiens	dynein cytoplasmic 1 heavy chain 1(DYNC1H1)
ENSG00000176788	BASP1	Homo sapiens	brain abundant membrane attached signal protein 1(BASP1)
ENSG00000152234	ATP5A1	Homo sapiens	ATP synthase, H+ transporting, mitochondrial F1 complex, alpha subunit 1, cardiac muscle(ATP5A1)
ENSG00000204843	DCTN1	Homo sapiens	dynactin subunit 1(DCTN1)
ENSG00000182095	TNRC18	Homo sapiens	trinucleotide repeat containing 18(TNRC18)
ENSG00000203879	GDI1	Homo sapiens	GDP dissociation inhibitor 1(GDI1)
ENSG00000164687	FABP5	Homo sapiens	fatty acid binding protein 5(FABP5)
ENSG00000143761	MIR3620	Homo sapiens	microRNA 3620(MIR3620)
ENSG00000142798	HSPG2	Homo sapiens	heparan sulfate proteoglycan 2(HSPG2)
ENSG00000142676	RPL11	Homo sapiens	ribosomal protein L11(RPL11)
ENSG00000127022	CANX	Homo sapiens	calnexin(CANX)
ENSG00000149294	NCAM1	Homo sapiens	neural cell adhesion molecule 1(NCAM1)
ENSG00000092199	HNRNPC	Homo sapiens	heterogeneous nuclear ribonucleoprotein C (C1/C2)(HNRNPC)
ENSG00000110700	RPS13	Homo sapiens	ribosomal protein S13(RPS13)
ENSG00000198586	TLK1	Homo sapiens	tousled like kinase 1(TLK1)
ENSG00000242265	PEG10	Homo sapiens	paternally expressed 10(PEG10)
ENSG00000084207	GSTP1	Homo sapiens	glutathione S-transferase pi 1(GSTP1)
ENSG00000142541	RPL13A	Homo sapiens	ribosomal protein L13a(RPL13A)
ENSG00000117450	PRDX1	Homo sapiens	peroxiredoxin 1(PRDX1)
ENSG00000142669	SH3BGRL3	Homo sapiens	SH3 domain binding glutamate rich protein like 3(SH3BGRL3)
ENSG00000105223	PLD3	Homo sapiens	phospholipase D family member 3(PLD3)
ENSG00000075624	ACTB	Homo sapiens	actin beta(ACTB)
ENSG00000198695	ND6	Homo sapiens	NADH dehydrogenase, subunit 6 (complex I)(ND6)
ENSG00000196154	S100A4	Homo sapiens	S100 calcium binding protein A4(S100A4)
ENSG00000276293	PIP4K2B	Homo sapiens	phosphatidylinositol-5-phosphate 4-kinase type 2 beta(PIP4K2B)
ENSG00000115268	RPS15	Homo sapiens	ribosomal protein S15(RPS15)
ENSG00000115266	APC2	Homo sapiens	APC2, WNT signaling pathway regulator(APC2)
ENSG00000144713	RPL32	Homo sapiens	ribosomal protein L32(RPL32)
ENSG00000120885	MIR6843	Homo sapiens	microRNA 6843(MIR6843)
ENSG00000232112	TMA7	Homo sapiens	translation machinery associated 7 homolog(TMA7)
ENSG00000167614	TTYH1	Homo sapiens	tweety family member 1(TTYH1)
ENSG00000164587	RPS14	Homo sapiens	ribosomal protein S14(RPS14)
ENSG00000168824	NSG1	Homo sapiens	neuron specific gene family member 1(NSG1)
ENSG00000075618	FSCN1	Homo sapiens	fascin actin-bundling protein 1(FSCN1)
ENSG00000142534	RPS11	Homo sapiens	ribosomal protein S11(RPS11)
ENSG00000165434	PGM2L1	Homo sapiens	phosphoglucomutase 2 like 1(PGM2L1)
ENSG00000167978	SRRM2	Homo sapiens	serine/arginine repetitive matrix 2(SRRM2)
ENSG00000149273	RPS3	Homo sapiens	ribosomal protein S3(RPS3)
ENSG00000198242	RPL23A	Homo sapiens	ribosomal protein L23a(RPL23A)
ENSG00000069275	NUCKS1	Homo sapiens	nuclear casein kinase and cyclin dependent kinase substrate 1(NUCKS1)
ENSG00000131747	TOP2A	Homo sapiens	topoisomerase (DNA) II alpha(TOP2A)
ENSG00000213923	LOC400927-CSNK1E	Homo sapiens	LOC400927-CSNK1E readthrough(LOC400927-CSNK1E)
ENSG00000164111	ANXA5	Homo sapiens	annexin A5(ANXA5)
ENSG00000136193	SCRN1	Homo sapiens	secernin 1(SCRN1)
ENSG00000137285	TUBB2B	Homo sapiens	tubulin beta 2B class IIb(TUBB2B)
ENSG00000115053	NCL	Homo sapiens	nucleolin(NCL)
ENSG00000117592	PRDX6	Homo sapiens	peroxiredoxin 6(PRDX6)
ENSG00000188322	SBK1	Homo sapiens	SH3 domain binding kinase 1(SBK1)
ENSG00000167508	MVD	Homo sapiens	mevalonate diphosphate decarboxylase(MVD)
ENSG00000105372	RPS19	Homo sapiens	ribosomal protein S19(RPS19)
ENSG00000109971	HSPA8	Homo sapiens	heat shock protein family A (Hsp70) member 8(HSPA8)
ENSG00000110955	ATP5B	Homo sapiens	ATP synthase, H+ transporting, mitochondrial F1 complex, beta polypeptide(ATP5B)
ENSG00000175130	MARCKSL1	Homo sapiens	MARCKS like 1(MARCKSL1)
ENSG00000220205	VAMP2	Homo sapiens	vesicle associated membrane protein 2(VAMP2)
ENSG00000178403	NEUROG2	Homo sapiens	neurogenin 2(NEUROG2)
ENSG00000152795	HNRNPDL	Homo sapiens	heterogeneous nuclear ribonucleoprotein D like(HNRNPDL)
ENSG00000118785	SPP1	Homo sapiens	secreted phosphoprotein 1(SPP1)
ENSG00000167996	FTH1	Homo sapiens	ferritin heavy chain 1(FTH1)
ENSG00000116133	DHCR24	Homo sapiens	24-dehydrocholesterol reductase(DHCR24)
ENSG00000116251	RPL22	Homo sapiens	ribosomal protein L22(RPL22)
ENSG00000132718	SYT11	Homo sapiens	synaptotagmin 11(SYT11)
ENSG00000131507	NDFIP1	Homo sapiens	Nedd4 family interacting protein 1(NDFIP1)
ENSG00000189403	HMGB1	Homo sapiens	high mobility group box 1(HMGB1)
ENSG00000187109	NAP1L1	Homo sapiens	nucleosome assembly protein 1 like 1(NAP1L1)
ENSG00000213741	LOC100288910	Homo sapiens	uncharacterized LOC100288910(LOC100288910)
ENSG00000071054	map4k4	Homo sapiens	mitogen-activated protein kinase kinase kinase kinase 4(MAP4K4)
ENSG00000070087	PFN2	Homo sapiens	profilin 2(PFN2)
ENSG00000099622	CIRBP	Homo sapiens	cold inducible RNA binding protein(CIRBP)
ENSG00000108946	PRKAR1A	Homo sapiens	protein kinase cAMP-dependent type I regulatory subunit alpha(PRKAR1A)
ENSG00000108828	VAT1	Homo sapiens	vesicle amine transport 1(VAT1)
ENSG00000137267	TUBB2A	Homo sapiens	tubulin beta 2A class IIa(TUBB2A)
ENSG00000065978	YBX1	Homo sapiens	Y-box binding protein 1(YBX1)
ENSG00000116560	SFPQ	Homo sapiens	splicing factor proline and glutamine rich(SFPQ)
ENSG00000136295	TTYH3	Homo sapiens	tweety family member 3(TTYH3)
ENSG00000163041	H3F3A	Homo sapiens	H3 histone family member 3A(H3F3A)
ENSG00000167526	RPL13	Homo sapiens	ribosomal protein L13(RPL13)
ENSG00000078814	MYH7B	Homo sapiens	myosin heavy chain 7B(MYH7B)
ENSG00000142864	SERBP1	Homo sapiens	SERPINE1 mRNA binding protein 1(SERBP1)
ENSG00000015479	MATR3	Homo sapiens	matrin 3(MATR3)
ENSG00000103363	TCEB2	Homo sapiens	transcription elongation factor B subunit 2(TCEB2)
ENSG00000128564	VGF	Homo sapiens	VGF nerve growth factor inducible(VGF)
ENSG00000130522	jund	Homo sapiens	JunD proto-oncogene, AP-1 transcription factor subunit(JUND)
ENSG00000130402	ACTN4	Homo sapiens	actinin alpha 4(ACTN4)
ENSG00000147065	MSN	Homo sapiens	moesin(MSN)
ENSG00000149485	MIR1908	Homo sapiens	microRNA 1908(MIR1908)
ENSG00000105426	PTPRS	Homo sapiens	protein tyrosine phosphatase, receptor type S(PTPRS)
ENSG00000264364	DYNLL2	Homo sapiens	dynein light chain LC8-type 2(DYNLL2)
ENSG00000167654	ATCAY	Homo sapiens	ATCAY, caytaxin(ATCAY)
ENSG00000113161	HMGCR	Homo sapiens	3-hydroxy-3-methylglutaryl-CoA reductase(HMGCR)
ENSG00000169710	FASN	Homo sapiens	fatty acid synthase(FASN)
ENSG00000159164	SV2A	Homo sapiens	synaptic vesicle glycoprotein 2A(SV2A)
ENSG00000137154	RPS6	Homo sapiens	ribosomal protein S6(RPS6)
ENSG00000166441	RPL27A	Homo sapiens	ribosomal protein L27a(RPL27A)
ENSG00000143947	RPS27A	Homo sapiens	ribosomal protein S27a(RPS27A)
ENSG00000165119	HNRNPK	Homo sapiens	heterogeneous nuclear ribonucleoprotein K(HNRNPK)
ENSG00000167658	EEF2	Homo sapiens	eukaryotic translation elongation factor 2(EEF2)
ENSG00000277586	NEFL	Homo sapiens	neurofilament, light polypeptide(NEFL)
ENSG00000100097	LGALS1	Homo sapiens	galectin 1(LGALS1)
ENSG00000124172	ATP5E	Homo sapiens	ATP synthase, H+ transporting, mitochondrial F1 complex, epsilon subunit(ATP5E)
ENSG00000026025	VIM	Homo sapiens	vimentin(VIM)
ENSG00000143933	CALM2	Homo sapiens	calmodulin 2(CALM2)
ENSG00000084234	APLP2	Homo sapiens	amyloid beta precursor like protein 2(APLP2)
ENSG00000234745	HLA-B	Homo sapiens	major histocompatibility complex, class I, B(HLA-B)
ENSG00000125148	MT2A	Homo sapiens	metallothionein 2A(MT2A)
ENSG00000130726	TRIM28	Homo sapiens	tripartite motif containing 28(TRIM28)
ENSG00000103034	NDRG4	Homo sapiens	NDRG family member 4(NDRG4)
ENSG00000105323	HNRNPUL1	Homo sapiens	heterogeneous nuclear ribonucleoprotein U like 1(HNRNPUL1)
ENSG00000131711	MAP1B	Homo sapiens	microtubule associated protein 1B(MAP1B)
ENSG00000130985	UBA1	Homo sapiens	ubiquitin like modifier activating enzyme 1(UBA1)
ENSG00000108953	YWHAE	Homo sapiens	tyrosine 3-monooxygenase/tryptophan 5-monooxygenase activation protein epsilon(YWHAE)
ENSG00000198034	RPS4X	Homo sapiens	ribosomal protein S4, X-linked(RPS4X)
ENSG00000105568	PPP2R1A	Homo sapiens	protein phosphatase 2 scaffold subunit Aalpha(PPP2R1A)
ENSG00000270800	RPS10-NUDT3	Homo sapiens	RPS10-NUDT3 readthrough(RPS10-NUDT3)
ENSG00000115009	CCL20	Homo sapiens	C-C motif chemokine ligand 20(CCL20)
ENSG00000139318	DUSP6	Homo sapiens	dual specificity phosphatase 6(DUSP6)
ENSG00000136167	LCP1	Homo sapiens	lymphocyte cytosolic protein 1(LCP1)
ENSG00000170961	HAS2	Homo sapiens	hyaluronan synthase 2(HAS2)
ENSG00000114391	RPL24	Homo sapiens	ribosomal protein L24(RPL24)
ENSG00000167552	TUBA1A	Homo sapiens	tubulin alpha 1a(TUBA1A)
ENSG00000258947	TUBB3	Homo sapiens	tubulin beta 3 class III(TUBB3)
ENSG00000277443	MARCKS	Homo sapiens	myristoylated alanine rich protein kinase C substrate(MARCKS)
ENSG00000181722	ZBTB20	Homo sapiens	zinc finger and BTB domain containing 20(ZBTB20)
ENSG00000128872	TMOD2	Homo sapiens	tropomodulin 2(TMOD2)
ENSG00000241697	TMEFF1	Homo sapiens	transmembrane protein with EGF like and two follistatin like domains 1(TMEFF1)
ENSG00000147274	RBMX	Homo sapiens	RNA binding motif protein, X-linked(RBMX)
ENSG00000142937	RPS8	Homo sapiens	ribosomal protein S8(RPS8)
ENSG00000104549	SQLE	Homo sapiens	squalene epoxidase(SQLE)
ENSG00000067715	SYT1	Homo sapiens	synaptotagmin 1(SYT1)
ENSG00000115310	RTN4	Homo sapiens	reticulon 4(RTN4)
ENSG00000139644	TMBIM6	Homo sapiens	transmembrane BAX inhibitor motif containing 6(TMBIM6)
ENSG00000166598	MIR3652	Homo sapiens	microRNA 3652(MIR3652)
ENSG00000154917	RAB6B	Homo sapiens	RAB6B, member RAS oncogene family(RAB6B)
ENSG00000054523	KIF1B	Homo sapiens	kinesin family member 1B(KIF1B)
ENSG00000175061	LRRC75A-AS1	Homo sapiens	LRRC75A antisense RNA 1(LRRC75A-AS1)
ENSG00000102003	SYP	Homo sapiens	synaptophysin(SYP)
ENSG00000126214	KLC1	Homo sapiens	kinesin light chain 1(KLC1)
ENSG00000053438	NNAT	Homo sapiens	neuronatin(NNAT)
ENSG00000254772	EEF1G	Homo sapiens	eukaryotic translation elongation factor 1 gamma(EEF1G)
ENSG00000130723	PRRC2B	Homo sapiens	proline rich coiled-coil 2B(PRRC2B)
ENSG00000147140	NONO	Homo sapiens	non-POU domain containing, octamer-binding(NONO)
ENSG00000067840	PDZD4	Homo sapiens	PDZ domain containing 4(PDZD4)
ENSG00000138326	RPS24	Homo sapiens	ribosomal protein S24(RPS24)
ENSG00000228253	ATP8	Homo sapiens	ATP synthase F0 subunit 8(ATP8)
ENSG00000115306	SPTBN1	Homo sapiens	spectrin beta, non-erythrocytic 1(SPTBN1)
ENSG00000241343	RPL36A	Homo sapiens	ribosomal protein L36a(RPL36A)
ENSG00000075340	ADD2	Homo sapiens	adducin 2(ADD2)
ENSG00000096384	HSP90AB1	Homo sapiens	heat shock protein 90 alpha family class B member 1(HSP90AB1)
ENSG00000116871	MAP7D1	Homo sapiens	MAP7 domain containing 1(MAP7D1)
ENSG00000169752	NRG4	Homo sapiens	neuregulin 4(NRG4)
ENSG00000221983	UBA52	Homo sapiens	ubiquitin A-52 residue ribosomal protein fusion product 1(UBA52)
ENSG00000157064	NMNAT2	Homo sapiens	nicotinamide nucleotide adenylyltransferase 2(NMNAT2)
ENSG00000105894	PTN	Homo sapiens	pleiotrophin(PTN)
ENSG00000117519	CNN3	Homo sapiens	calponin 3(CNN3)
ENSG00000135387	CAPRIN1	Homo sapiens	cell cycle associated protein 1(CAPRIN1)
ENSG00000115457	IGFBP2	Homo sapiens	insulin like growth factor binding protein 2(IGFBP2)
ENSG00000227051	C14orf132	Homo sapiens	chromosome 14 open reading frame 132(C14orf132)
ENSG00000265681	RPL17	Homo sapiens	ribosomal protein L17(RPL17)
ENSG00000117632	MIR3917	Homo sapiens	microRNA 3917(MIR3917)
ENSG00000171843	MLLT3	Homo sapiens	MLLT3, super elongation complex subunit(MLLT3)
ENSG00000256618	MTRNR2L1	Homo sapiens	MT-RNR2-like 1(MTRNR2L1)
ENSG00000229117	RPL41	Homo sapiens	ribosomal protein L41(RPL41)
ENSG00000008394	MGST1	Homo sapiens	microsomal glutathione S-transferase 1(MGST1)
ENSG00000128739	SNRPN	Homo sapiens	small nuclear ribonucleoprotein polypeptide N(SNRPN)
ENSG00000140988	RPS2	Homo sapiens	ribosomal protein S2(RPS2)
ENSG00000118816	CCNI	Homo sapiens	cyclin I(CCNI)
ENSG00000172809	RPL38	Homo sapiens	ribosomal protein L38(RPL38)
ENSG00000182985	CADM1	Homo sapiens	cell adhesion molecule 1(CADM1)
ENSG00000102265	TIMP1	Homo sapiens	TIMP metallopeptidase inhibitor 1(TIMP1)
ENSG00000104435	STMN2	Homo sapiens	stathmin 2(STMN2)
ENSG00000138668	HNRNPD	Homo sapiens	heterogeneous nuclear ribonucleoprotein D(HNRNPD)
ENSG00000105409	ATP1A3	Homo sapiens	ATPase Na+/K+ transporting subunit alpha 3(ATP1A3)
ENSG00000136485	DCAF7	Homo sapiens	DDB1 and CUL4 associated factor 7(DCAF7)
ENSG00000179218	CALR	Homo sapiens	calreticulin(CALR)
ENSG00000117984	CTSD	Homo sapiens	cathepsin D(CTSD)
ENSG00000071082	RPL31	Homo sapiens	ribosomal protein L31(RPL31)
ENSG00000171724	VAT1L	Homo sapiens	vesicle amine transport 1 like(VAT1L)
ENSG00000171603	CLSTN1	Homo sapiens	calsyntenin 1(CLSTN1)
ENSG00000113140	SPARC	Homo sapiens	secreted protein acidic and cysteine rich(SPARC)
ENSG00000274012	RN7SL2	Homo sapiens	RNA, 7SL, cytoplasmic 2(RN7SL2)
ENSG00000137331	IER3	Homo sapiens	immediate early response 3(IER3)
ENSG00000213190	MLLT11	Homo sapiens	myeloid/lymphoid or mixed-lineage leukemia; translocated to, 11(MLLT11)
ENSG00000205336	ADGRG1	Homo sapiens	adhesion G protein-coupled receptor G1(ADGRG1)
ENSG00000188157	AGRN	Homo sapiens	agrin(AGRN)
ENSG00000129951	PLPPR3	Homo sapiens	phospholipid phosphatase related 3(PLPPR3)
ENSG00000105640	RPL18A	Homo sapiens	ribosomal protein L18a(RPL18A)
ENSG00000002834	LASP1	Homo sapiens	LIM and SH3 protein 1(LASP1)
ENSG00000116729	WLS	Homo sapiens	wntless Wnt ligand secretion mediator(WLS)
ENSG00000137309	HMGA1	Homo sapiens	high mobility group AT-hook 1(HMGA1)
ENSG00000179222	MAGED1	Homo sapiens	MAGE family member D1(MAGED1)
ENSG00000164091	WDR82	Homo sapiens	WD repeat domain 82(WDR82)
ENSG00000135486	HNRNPA1	Homo sapiens	heterogeneous nuclear ribonucleoprotein A1(HNRNPA1)
ENSG00000159335	PTMS	Homo sapiens	parathymosin(PTMS)
ENSG00000138758	SEPT11	Homo sapiens	septin 11(SEPT11)
ENSG00000171863	RPS7	Homo sapiens	ribosomal protein S7(RPS7)
ENSG00000171858	RPS21	Homo sapiens	ribosomal protein S21(RPS21)
ENSG00000170889	RPS9	Homo sapiens	ribosomal protein S9(RPS9)
ENSG00000007168	PAFAH1B1	Homo sapiens	platelet activating factor acetylhydrolase 1b regulatory subunit 1(PAFAH1B1)
ENSG00000171617	ENC1	Homo sapiens	ectodermal-neural cortex 1(ENC1)
ENSG00000189159	HN1	Homo sapiens	hematological and neurological expressed 1(HN1)
ENSG00000255823	MTRNR2L8	Homo sapiens	MT-RNR2-like 8(MTRNR2L8)
ENSG00000141934	PLPP2	Homo sapiens	phospholipid phosphatase 2(PLPP2)
ENSG00000123384	LRP1	Homo sapiens	LDL receptor related protein 1(LRP1)
ENSG00000169429	CXCL8	Homo sapiens	C-X-C motif chemokine ligand 8(CXCL8)
ENSG00000169306	IL1RAPL1	Homo sapiens	interleukin 1 receptor accessory protein like 1(IL1RAPL1)
ENSG00000125691	RPL23	Homo sapiens	ribosomal protein L23(RPL23)
ENSG00000168461	RAB31	Homo sapiens	RAB31, member RAS oncogene family(RAB31)
ENSG00000152932	RAB3C	Homo sapiens	RAB3C, member RAS oncogene family(RAB3C)
ENSG00000150991	UBC	Homo sapiens	ubiquitin C(UBC)
ENSG00000173812	EIF1	Homo sapiens	eukaryotic translation initiation factor 1(EIF1)
ENSG00000233927	RPS28	Homo sapiens	ribosomal protein S28(RPS28)
ENSG00000139970	RTN1	Homo sapiens	reticulon 1(RTN1)
ENSG00000150625	GPM6A	Homo sapiens	glycoprotein M6A(GPM6A)
ENSG00000231500	RPS18	Homo sapiens	ribosomal protein S18(RPS18)
ENSG00000166165	CKB	Homo sapiens	creatine kinase B(CKB)
ENSG00000063046	EIF4B	Homo sapiens	eukaryotic translation initiation factor 4B(EIF4B)
ENSG00000169439	SDC2	Homo sapiens	syndecan 2(SDC2)
ENSG00000148798	INA	Homo sapiens	internexin neuronal intermediate filament protein alpha(INA)
ENSG00000182899	RPL35A	Homo sapiens	ribosomal protein L35a(RPL35A)
ENSG00000133048	CHI3L1	Homo sapiens	chitinase 3 like 1(CHI3L1)
ENSG00000080824	HSP90AA1	Homo sapiens	heat shock protein 90 alpha family class A member 1(HSP90AA1)
ENSG00000212907	ND4L	Homo sapiens	NADH dehydrogenase, subunit 4L (complex I)(ND4L)
ENSG00000102109	PCSK1N	Homo sapiens	proprotein convertase subtilisin/kexin type 1 inhibitor(PCSK1N)
ENSG00000102226	USP11	Homo sapiens	ubiquitin specific peptidase 11(USP11)
ENSG00000090621	PABPC4	Homo sapiens	poly(A) binding protein cytoplasmic 4(PABPC4)
ENSG00000100167	SEPT3	Homo sapiens	septin 3(SEPT3)
ENSG00000010404	IDS	Homo sapiens	iduronate 2-sulfatase(IDS)
ENSG00000084070	SMAP2	Homo sapiens	small ArfGAP2(SMAP2)
ENSG00000148303	RPL7A	Homo sapiens	ribosomal protein L7a(RPL7A)
ENSG00000084073	ZMPSTE24	Homo sapiens	zinc metallopeptidase STE24(ZMPSTE24)
ENSG00000087460	GNAS	Homo sapiens	GNAS complex locus(GNAS)
ENSG00000182768	NGRN	Homo sapiens	neugrin, neurite outgrowth associated(NGRN)
ENSG00000171533	MAP6	Homo sapiens	microtubule associated protein 6(MAP6)
ENSG00000114554	plxna1	Homo sapiens	plexin A1(PLXNA1)
ENSG00000136689	IL1RN	Homo sapiens	interleukin 1 receptor antagonist(IL1RN)
ENSG00000116852	KIF21B	Homo sapiens	kinesin family member 21B(KIF21B)
ENSG00000110076	NRXN2	Homo sapiens	neurexin 2(NRXN2)
ENSG00000228474	OST4	Homo sapiens	oligosaccharyltransferase complex subunit 4, non-catalytic(OST4)
ENSG00000196924	FLNA	Homo sapiens	filamin A(FLNA)
ENSG00000170558	CDH2	Homo sapiens	cadherin 2(CDH2)
ENSG00000170315	UBB	Homo sapiens	ubiquitin B(UBB)
ENSG00000272031	ANKRD34A	Homo sapiens	ankyrin repeat domain 34A(ANKRD34A)
ENSG00000189043	NDUFA4	Homo sapiens	NDUFA4, mitochondrial complex associated(NDUFA4)
ENSG00000127616	SMARCA4	Homo sapiens	SWI/SNF related, matrix associated, actin dependent regulator of chromatin, subfamily a, member 4(SMARCA4)
ENSG00000054793	ATP9A	Homo sapiens	ATPase phospholipid transporting 9A (putative)(ATP9A)
ENSG00000161970	RPL26	Homo sapiens	ribosomal protein L26(RPL26)
ENSG00000179010	MRFAP1	Homo sapiens	Morf4 family associated protein 1(MRFAP1)
ENSG00000182774	RPS17	Homo sapiens	ribosomal protein S17(RPS17)
ENSG00000181449	SOX2	Homo sapiens	SRY-box 2(SOX2)
ENSG00000272398	CD24	Homo sapiens	CD24 molecule(CD24)

## Sheet: KEGG 2021 HUMAN
Term	Overlap	P-value	Adjusted P-value	Old P-value	Old Adjusted P-value	Odds Ratio	Combined Score	Genes
Ribosome	76/158	1.38098e-77	3.38339e-75	0	0	39.7593	7036.46	RPL4;RPL5;RPL30;RPL3;RPL32;RPL31;RPL34;RPLP1;RPLP0;RPL10A;RPL9;RPL6;RPL7;RPS15;RPS4X;RPS14;RPL7A;RPS17;RPS16;RPL18A;RPS19;RPS18;RPL36;RPL35;RPLP2;RPL38;RPL37;RPS11;RPL39;RPS10;RPS13;RPS12;RPS9;RPL21;RPS7;RPS8;RPL23;RPS5;RPL22;RPS6;RPL13A;RPSA;RPS3A;RPL37A;RPL24;RPL27;RPL26;RPL29;UBA52;RPL10;RPS10-NUDT3;RPL12;RPL11;RPL36A;RPS15A;RPL14;RPS3;RPL13;RPL15;RPS2;RPL18;RPS27A;RPL17;RPL19;RPL41;RPL35A;RPL…
Coronavirus disease	79/232	3.65452e-66	4.47679e-64	0	0	22.2164	3347.45	RPL4;RPL5;RPL30;RPL3;CXCL8;RPL32;RPL31;RPL34;RPLP1;RPLP0;RPL10A;RPL9;RPL6;RPL7;RPS15;RPS4X;RPS14;RPL7A;RPS17;RPS16;RPL18A;RPS19;RPS18;RPL36;RPL35;RPLP2;RPL38;RPL37;RPS11;RPL39;RPS10;RPS13;RPS12;RPS9;RPL21;RPS7;RPS8;RPL23;RPS5;RPL22;RPS6;RPL13A;RPSA;RPS3A;IL1B;RPL37A;RPL24;RPL27;RPL26;RPL29;UBA52;RPL10;RPS10-NUDT3;RPL12;RPL11;RPL36A;RPS15A;RPL14;RPS3;RPL13;RPL15;RPS2;RPL18;RPS27A;RPL17;RPL19;RPL41…
Parkinson disease	41/249	4.26836e-21	3.48583e-19	0	0	7.79719	365.712	ND6;ATP8;COX4I1;ATP6;COX6A1;KLC1;UQCRH;TUBA1B;UCHL1;TUBA1A;UBB;KIF5C;TUBB3;KIF5A;UBC;COX3;COX2;COX1;RPS27A;HSPA5;NDUFA4;TUBB;ND4L;COX6C;TUBB2B;TUBB2A;UQCRQ;GNAS;CALM3;ND1;UBA1;MAPT;CYTB;CALM1;ND3;UBA52;CALM2;ND2;ND5;ND4;SLC25A6
Pathways of neurodegeneration	52/475	2.8684e-18	1.7569e-16	0	0	4.91958	198.716	APP;COX4I1;ATP2A2;COX6A1;TUBA1B;UCHL1;TUBA1A;TUBB3;KIF5C;KIF5A;NEFL;NEFM;APC2;TUBB;TUBB2B;TUBB2A;IL1B;ND1;MAPT;ND3;UBA52;ND2;SQSTM1;ND5;ND4;SLC25A6;ND6;ATP8;DCTN1;ATP6;KLC1;UQCRH;UBB;UBC;COX3;COX2;COX1;RPS27A;PRPH;HSPA5;FUS;NDUFA4;ND4L;COX6C;UQCRQ;CTNNB1;CALM3;UBA1;CYTB;CALM1;CALM2;CDK5R1
Alzheimer disease	43/369	2.86474e-16	1.40372e-14	0	0	5.207	186.353	APP;ND6;RTN3;LRP1;ATP8;COX4I1;ATP6;ATP2A2;COX6A1;KLC1;RTN4;UQCRH;TUBA1B;TUBA1A;KIF5C;TUBB3;KIF5A;COX3;COX2;COX1;APC2;NDUFA4;TUBB;ND4L;COX6C;TUBB2B;TUBB2A;UQCRQ;IL1B;CTNNB1;CALM3;ND1;MAPT;CYTB;CALM1;ND3;CALM2;ND2;GAPDH;ND5;CDK5R1;ND4;SLC25A6
Amyotrophic lateral sclerosis	42/364	9.18769e-16	3.75164e-14	0	0	5.13956	177.95	ND6;ATP8;DCTN1;COX4I1;ATP6;COX6A1;KLC1;ACTB;UQCRH;ACTG1;TUBA1B;TUBA1A;KIF5C;TUBB3;KIF5A;COX3;COX2;NEFL;COX1;NEFM;HNRNPA1;PRPH;HSPA5;FUS;NDUFA4;TUBB;ND4L;COX6C;TUBB2B;TUBB2A;UQCRQ;NRG4;HNRNPA2B1;MATR3;ND1;CYTB;ND3;ND2;SQSTM1;ND5;PFN2;ND4
Prion disease	33/273	3.2645e-13	1.14257e-11	0	0	5.34222	153.592	ND6;ATP8;COX4I1;ATP6;COX6A1;KLC1;UQCRH;TUBA1B;TUBA1A;KIF5C;TUBB3;KIF5A;COX3;COX2;COX1;NCAM1;HSPA8;HSPA5;NDUFA4;TUBB;ND4L;COX6C;TUBB2B;TUBB2A;UQCRQ;IL1B;ND1;CYTB;ND3;ND2;ND5;ND4;SLC25A6
Huntington disease	33/306	7.87417e-12	2.41146e-10	0	0	4.6884	119.87	ND6;ATP8;DCTN1;COX4I1;CLTC;ATP6;COX6A1;KLC1;UQCRH;TUBA1B;TUBA1A;KIF5C;TUBB3;KIF5A;COX3;COX2;COX1;AP2M1;NDUFA4;TUBB;ND4L;AP2B1;COX6C;TUBB2B;TUBB2A;UQCRQ;ND1;CYTB;ND3;ND2;ND5;ND4;SLC25A6
Diabetic cardiomyopathy	25/203	1.68776e-10	4.59446e-09	0	0	5.38734	121.228	ND6;ATP8;COX4I1;ATP6;ATP2A2;COX6A1;UQCRH;PPP1CB;COX3;COX2;COX1;CTSD;NDUFA4;ND4L;COX6C;MMP9;UQCRQ;ND1;CYTB;ND3;ND2;GAPDH;ND5;ND4;SLC25A6
Salmonella infection	27/249	5.73507e-10	1.40509e-08	0	0	4.67309	99.4398	CXCL8;HSP90AB1;DCTN1;KLC1;ACTB;ACTG1;TUBA1B;TUBA1A;KIF5C;TUBB3;KIF5A;RPS3;FLNA;SKP1;DYNC1H1;ACTR2;HSP90AA1;TUBB;DYNLL2;RHOA;TUBB2B;TUBB2A;ARPC2;IL1B;CTNNB1;GAPDH;PFN2
Oxidative phosphorylation	19/133	2.19867e-09	4.89705e-08	0	0	6.33857	126.362	ND6;ATP8;NDUFA4;COX4I1;ATP6;ND4L;COX6A1;COX6C;UQCRH;UQCRQ;COX3;COX2;ND1;COX1;CYTB;ND3;ND2;ND5;ND4
Thermogenesis	24/232	1.32588e-08	2.707e-07	0	0	4.41026	79.9959	ND6;ATP8;NDUFA4;COX4I1;RPS6;ATP6;ND4L;COX6C;COX6A1;ACTB;UQCRH;SMARCA4;ACTG1;UQCRQ;COX3;GNAS;COX2;COX1;ND1;CYTB;ND3;ND2;ND5;ND4
Fluid shear stress and atherosclerosis	15/139	4.17833e-06	7.87455e-05	0	0	4.56235	56.5074	HSP90AA1;HSP90AB1;SDC2;GSTP1;MGST1;MMP9;ACTB;RHOA;ACTG1;IL1B;CTNNB1;CALM3;CALM1;SQSTM1;CALM2
Pathogenic Escherichia coli infection	18/197	5.1765e-06	9.05888e-05	0	0	3.80407	46.3008	ACTR2;CXCL8;TUBB;MYO5A;ACTB;RHOA;ACTG1;TUBA1B;TUBB2B;TUBA1A;TUBB2A;ARPC2;TUBB3;IL1B;NCL;RPS3;TMBIM6;GAPDH
Cardiac muscle contraction	11/87	1.78944e-05	0.000292275	0	0	5.43001	59.3556	UQCRQ;COX4I1;COX3;ATP2A2;ATP1A3;COX2;COX1;CYTB;COX6A1;COX6C;UQCRH
Phagosome	14/152	5.22557e-05	0.000800166	0	0	3.81599	37.6233	DYNC1H1;TUBB;ITGB2;HLA-B;HLA-A;ACTB;ACTG1;TUBA1B;TUBB2B;TUBA1A;TUBB2A;TUBB3;CANX;CALR
Proteoglycans in cancer	16/205	0.000115391	0.00166298	0	0	3.18833	28.9092	CD63;CDKN1A;SDC2;RPS6;PLAUR;MSN;ANK2;HSPG2;MMP9;ACTB;RHOA;ACTG1;PPP1CB;FLNA;CTNNB1;EIF4B
Steroid biosynthesis	5/20	0.000140432	0.00191143	0	0	12.4009	110.006	SQLE;DHCR24;MSMO1;LSS;FDFT1
Antigen processing and presentation	9/78	0.000210474	0.00271401	0	0	4.87635	41.2839	HSPA8;HSP90AA1;HSP90AB1;HSPA5;CANX;HLA-B;HLA-A;CALR;B2M
Hippo signaling pathway	13/163	0.000400942	0.00491154	0	0	3.2516	25.433	YWHAE;APC2;YWHAB;ITGB2;YWHAZ;ACTB;ACTG1;PPP1CB;SOX2;YWHAQ;PPP2R1A;CTNNB1;YWHAG
Cell adhesion molecules	12/148	0.000571907	0.00667225	0	0	3.30643	24.6876	CADM3;ALCAM;CDH2;CADM1;SDC2;SDC3;ITGB2;HLA-B;NRXN2;NCAM1;HLA-A;L1CAM
Oocyte meiosis	11/129	0.000630092	0.00675762	0	0	3.48972	25.718	PPP1CB;YWHAE;YWHAQ;PPP2R1A;YWHAB;CALM3;CALM1;CALM2;YWHAZ;YWHAG;SKP1
Kaposi sarcoma-associated herpesvirus infection	14/193	0.000634389	0.00675762	0	0	2.9357	21.6151	CDKN1A;CXCL8;HLA-B;HLA-A;GNG2;UBB;UBC;GNB1;CTNNB1;CALM3;CALM1;RPS27A;UBA52;CALM2
Legionellosis	7/57	0.000724557	0.00716646	0	0	5.21896	37.7328	EEF1A1;EEF1G;HSPA8;CXCL8;IL1B;ITGB2;EEF1A2
PPAR signaling pathway	8/74	0.000731271	0.00716646	0	0	4.52354	32.6633	FADS2;HMGCS1;FABP5;SCD;FABP7;UBC;DBI;PLIN2
Non-alcoholic fatty liver disease	12/155	0.000861952	0.00771388	0	0	3.14344	22.1811	CXCL8;UQCRQ;NDUFA4;COX4I1;IL1B;COX3;COX2;COX1;CYTB;COX6A1;COX6C;UQCRH
Pertussis	8/76	0.000873883	0.00771388	0	0	4.39005	30.9172	CXCL8;IL1B;ITGB2;CFL1;CALM3;CALM1;CALM2;RHOA
Shigellosis	16/246	0.000881587	0.00771388	0	0	2.6144	18.3891	ACTR2;CXCL8;ACTN4;FNBP1L;ACTB;RHOA;ACTG1;UBB;ARPC2;IL1B;UBC;RPS27A;UBA52;SQSTM1;SKP1;PFN2
Human cytomegalovirus infection	15/225	0.000985425	0.00832515	0	0	2.68198	18.5659	CDKN1A;CXCL8;HLA-B;HLA-A;RHOA;GNG2;IL1B;GNB1;GNAS;CTNNB1;CALM3;CALR;CALM1;B2M;CALM2
Glycolysis / Gluconeogenesis	7/67	0.00190133	0.0154309	0	0	4.3469	27.2342	LDHB;TPI1;PKM;ENO1;ENO2;ALDOA;GAPDH
Malaria	6/50	0.00195248	0.0154309	0	0	5.07524	31.6626	CXCL8;LRP1;CD81;IL1B;SDC2;ITGB2
Regulation of actin cytoskeleton	14/218	0.00203667	0.0155933	0	0	2.57259	15.9409	APC2;ACTR2;ITGB2;MSN;ACTN4;ACTB;RHOA;ACTG1;PPP1CB;ARPC2;TMSB4X;CFL1;PIP4K2B;PFN2
Terpenoid backbone biosynthesis	4/22	0.00240671	0.017868	0	0	8.25021	49.7446	HMGCS1;MVD;HMGCR;ZMPSTE24
Oxytocin signaling pathway	11/154	0.00264574	0.0186441	0	0	2.87591	17.068	PPP1CB;MYL6;CDKN1A;GNAS;CALM3;EEF2;CALM1;CALM2;ACTB;RHOA;ACTG1
Dopaminergic synapse	10/132	0.00266345	0.0186441	0	0	3.0619	18.1514	PPP1CB;GNG2;KIF5C;PPP2R1A;KIF5A;GNB1;GNAS;CALM3;CALM1;CALM2
Viral carcinogenesis	13/203	0.00297163	0.0202236	0	0	2.56174	14.9058	YWHAE;CDKN1A;YWHAB;HLA-B;CHD4;ACTN4;HLA-A;YWHAZ;RHOA;HNRNPK;PKM;YWHAQ;YWHAG
IL-17 signaling pathway	8/94	0.00341949	0.0226426	0	0	3.46798	19.6921	CXCL10;HSP90AA1;CXCL8;HSP90AB1;JUND;CCL20;IL1B;MMP9
Gastric acid secretion	7/76	0.0039036	0.025168	0	0	3.77816	20.9531	GNAS;ATP1A3;CALM3;CALM1;CALM2;ACTB;ACTG1
Bacterial invasion of epithelial cells	7/77	0.00419865	0.0263761	0	0	3.72399	20.3814	ACTR2;ARPC2;CLTC;CTNNB1;ACTB;RHOA;ACTG1
Viral myocarditis	6/60	0.00493206	0.0302089	0	0	4.13325	21.9558	ITGB2;HLA-B;HLA-A;ACTB;EIF4G2;ACTG1
Tight junction	11/169	0.0053561	0.0320059	0	0	2.60086	13.6013	ACTR2;MYL6;TUBA1B;TUBA1A;ARPC2;PPP2R1A;MSN;ACTN4;ACTB;RHOA;ACTG1
Vasopressin-regulated water reabsorption	5/44	0.00584887	0.0333989	0	0	4.76369	24.4925	DYNC1H1;DCTN1;GNAS;DYNLL2;VAMP2
Phototransduction	4/28	0.00594631	0.0333989	0	0	6.18575	31.7019	GNB1;CALM3;CALM1;CALM2
Retrograde endocannabinoid signaling	10/148	0.00599816	0.0333989	0	0	2.70466	13.8379	ND6;GNG2;NDUFA4;GNB1;ND1;ND4L;ND3;ND2;ND5;ND4
Endocytosis	14/252	0.00733885	0.039956	0	0	2.20119	10.8179	HSPA8;ACTR2;CLTC;HLA-B;HLA-A;AP2B1;RHOA;ACAP3;RAB31;ARPC2;KIF5C;KIF5A;SMAP2;AP2M1
HIF-1 signaling pathway	8/109	0.00830219	0.0442182	0	0	2.95065	14.1372	LDHB;CDKN1A;RPS6;ENO1;TIMP1;ENO2;ALDOA;GAPDH
Cellular senescence	10/156	0.00857951	0.0442271	0	0	2.5554	12.1596	PPP1CB;CDKN1A;CXCL8;HLA-B;CALM3;HLA-A;CALM1;SQSTM1;CALM2;SLC25A6
Gap junction	7/88	0.0086649	0.0442271	0	0	3.21644	15.2732	TUBA1B;TUBB2B;TUBA1A;TUBB2A;TUBB3;TUBB;GNAS
Hepatitis C	10/157	0.0089542	0.044771	0	0	2.53789	11.9677	YWHAE;CXCL10;CDKN1A;YWHAQ;CD81;PPP2R1A;YWHAB;CTNNB1;YWHAZ;YWHAG
Estrogen signaling pathway	9/137	0.0106069	0.0515992	0	0	2.62066	11.9142	HSPA8;HSP90AA1;HSP90AB1;GNAS;CALM3;CALM1;CALM2;CTSD;MMP9
Leukocyte transendothelial migration	8/114	0.0107411	0.0515992	0	0	2.81074	12.743	ITGB2;MSN;CTNNB1;ACTN4;MMP9;ACTB;RHOA;ACTG1
Endocrine and other factor-regulated calcium reabsorption	5/53	0.0127469	0.0600576	0	0	3.86871	16.8771	CLTC;GNAS;ATP1A3;AP2B1;AP2M1
Synaptic vesicle cycle	6/78	0.0170572	0.0778138	0	0	3.09706	12.6087	SYT1;STXBP1;CLTC;AP2B1;AP2M1;VAMP2
Cell cycle	8/124	0.0171508	0.0778138	0	0	2.56711	10.4371	YWHAE;CDKN1A;YWHAQ;YWHAB;BUB3;YWHAZ;YWHAG;SKP1
Spliceosome	9/150	0.0182652	0.0813631	0	0	2.37744	9.51633	HSPA8;HNRNPK;FUS;HNRNPU;HNRNPC;SNRNP200;HNRNPA1;PRPF8;RBMX
Rap1 signaling pathway	11/210	0.0241274	0.105558	0	0	2.06062	7.67459	ITGB2;GNAS;CTNNB1;CALM3;EVL;CALM1;CALM2;ACTB;RHOA;PFN2;ACTG1
Necroptosis	9/159	0.0255181	0.108303	0	0	2.23376	8.19424	HSP90AA1;HSP90AB1;FTH1;IL1B;HMGB1;PPIA;SQSTM1;FTL;SLC25A6
Human immunodeficiency virus 1 infection	11/212	0.025639	0.108303	0	0	2.03991	7.47349	GNG2;CFL1;GNB1;HLA-B;CALM3;HLA-A;CALR;CALM1;B2M;CALM2;SKP1
Type I diabetes mellitus	4/43	0.0263222	0.109304	0	0	3.80368	13.8353	IL1B;HLA-B;CPE;HLA-A
Lipid and atherosclerosis	11/215	0.0280333	0.114469	0	0	2.0096	7.18302	HSPA8;HSP90AA1;CXCL8;HSP90AB1;HSPA5;IL1B;CALM3;CALM1;CALM2;MMP9;RHOA
Mitophagy	5/68	0.0336877	0.135303	0	0	2.94531	9.98643	UBB;UBC;RPS27A;SQSTM1;UBA52
Amphetamine addiction	5/69	0.0355625	0.140529	0	0	2.89914	9.67288	PPP1CB;GNAS;CALM3;CALM1;CALM2
Salivary secretion	6/93	0.0365656	0.142199	0	0	2.5611	8.47379	GNAS;ATP1A3;CALM3;CALM1;CALM2;VAMP2
Neurotrophin signaling pathway	7/119	0.0384866	0.147332	0	0	2.32246	7.56528	YWHAE;MAGED1;KIDINS220;CALM3;CALM1;CALM2;RHOA
Adherens junction	5/71	0.0395018	0.148891	0	0	2.811	9.08348	CTNNB1;ACTN4;ACTB;RHOA;ACTG1
Circadian entrainment	6/97	0.0434896	0.15669	0	0	2.44802	7.67513	GNG2;GNB1;GNAS;CALM3;CALM1;CALM2
Fc gamma R-mediated phagocytosis	6/97	0.0434896	0.15669	0	0	2.44802	7.67513	ACTR2;MARCKSL1;MARCKS;ARPC2;CFL1;PLPP2
Prostate cancer	6/97	0.0434896	0.15669	0	0	2.44802	7.67513	CDKN1A;HSP90AA1;HSP90AB1;GSTP1;CTNNB1;MMP9
Inflammatory mediator regulation of TRP channels	6/98	0.0453402	0.16031	0	0	2.42129	7.49041	PPP1CB;IL1B;GNAS;CALM3;CALM1;CALM2
Adrenergic signaling in cardiomyocytes	8/150	0.045803	0.16031	0	0	2.09426	6.45745	PPP1CB;PPP2R1A;GNAS;ATP2A2;ATP1A3;CALM3;CALM1;CALM2
Thyroid hormone synthesis	5/75	0.0481481	0.166145	0	0	2.64982	8.03817	TTR;HSPA5;CANX;GNAS;ATP1A3
PI3K-Akt signaling pathway	15/354	0.0497818	0.169396	0	0	1.65028	4.95101	YWHAE;CDKN1A;HSP90AA1;HSP90AB1;YWHAB;RPS6;YWHAZ;GNG2;YWHAQ;PPP2R1A;GNB1;SPP1;YWHAG;EIF4B;MCL1
Arrhythmogenic right ventricular cardiomyopathy	5/77	0.0528583	0.171909	0	0	2.57595	7.57366	CDH2;ATP2A2;CTNNB1;ACTB;ACTG1
Leishmaniasis	5/77	0.0528583	0.171909	0	0	2.57595	7.57366	EEF1A1;MARCKSL1;IL1B;ITGB2;EEF1A2
Amoebiasis	6/102	0.053228	0.171909	0	0	2.31992	6.80473	CXCL8;PRDX1;IL1B;ITGB2;GNAS;ACTN4
Lysosome	7/128	0.0533269	0.171909	0	0	2.14871	6.29855	CD63;PSAP;CLTC;PPT1;LAPTM5;IDS;CTSD
RNA degradation	5/79	0.0578272	0.183996	0	0	2.50607	7.14305	BTG1;CNOT7;PABPC4;ENO1;ENO2
Parathyroid hormone synthesis, secretion and action	6/106	0.0618994	0.194428	0	0	2.22667	6.19513	CDKN1A;MMP14;JUND;NACA;GNAS;RHOA
Vascular smooth muscle contraction	7/133	0.0629301	0.195163	0	0	2.06291	5.70546	PPP1CB;MYL6;GNAS;CALM3;CALM1;CALM2;RHOA
Glucagon signaling pathway	6/107	0.0641903	0.196583	0	0	2.20451	6.05336	LDHB;PKM;GNAS;CALM3;CALM1;CALM2
Human T-cell leukemia virus 1 infection	10/219	0.0659991	0.199627	0	0	1.77929	4.83633	CDKN1A;CANX;ITGB2;HLA-B;HLA-A;CALR;BUB3;B2M;RAN;SLC25A6
Apelin signaling pathway	7/137	0.0713237	0.208027	0	0	1.99903	5.27848	GNG2;RPS6;GNB1;SPP1;CALM3;CALM1;CALM2
Insulin signaling pathway	7/137	0.0713237	0.208027	0	0	1.99903	5.27848	PPP1CB;PRKAR1A;FASN;RPS6;CALM3;CALM1;CALM2
Yersinia infection	7/137	0.0713237	0.208027	0	0	1.99903	5.27848	ACTR2;CXCL8;ARPC2;IL1B;ACTB;RHOA;ACTG1
Mineral absorption	4/60	0.0737436	0.212555	0	0	2.64667	6.9003	MT2A;FTH1;ATP1A3;FTL
cGMP-PKG signaling pathway	8/167	0.0757092	0.215683	0	0	1.8687	4.82284	PPP1CB;ATP2A2;ATP1A3;CALM3;CALM1;CALM2;RHOA;SLC25A6
Hepatocellular carcinoma	8/168	0.0777642	0.218991	0	0	1.85692	4.74272	APC2;CDKN1A;GSTP1;MGST1;CTNNB1;ACTB;ACTG1;SMARCA4
Apoptosis	7/142	0.082707	0.230264	0	0	1.92449	4.7967	TUBA1B;TUBA1A;CTSD;SPTAN1;ACTB;ACTG1;MCL1
Protein processing in endoplasmic reticulum	8/171	0.084128	0.231588	0	0	1.82246	4.51136	DNAJA1;HSPA8;HSP90AA1;HSP90AB1;HSPA5;CANX;CALR;SKP1
Bladder cancer	3/41	0.0934077	0.254277	0	0	2.92241	6.92838	CDKN1A;CXCL8;MMP9
Graft-versus-host disease	3/42	0.0987186	0.265561	0	0	2.84733	6.59293	IL1B;HLA-B;HLA-A
GnRH signaling pathway	5/93	0.0997421	0.265561	0	0	2.10586	4.85436	MMP14;GNAS;CALM3;CALM1;CALM2
Long-term potentiation	4/67	0.100805	0.265561	0	0	2.35175	5.39625	PPP1CB;CALM3;CALM1;CALM2
Renin secretion	4/69	0.109273	0.284807	0	0	2.27915	5.04584	GNAS;CALM3;CALM1;CALM2
Aldosterone synthesis and secretion	5/98	0.117603	0.300132	0	0	1.99213	4.26403	GNAS;ATP1A3;CALM3;CALM1;CALM2
mRNA surveillance pathway	5/98	0.117603	0.300132	0	0	1.99213	4.26403	PPP1CB;PPP2R1A;WDR82;FUS;PABPC4
Alcoholism	8/186	0.120363	0.300908	0	0	1.66759	3.53069	PPP1CB;GNG2;PKIA;GNB1;GNAS;CALM3;CALM1;CALM2
RNA transport	8/186	0.120363	0.300908	0	0	1.66759	3.53069	EEF1A1;FUS;PABPC4;EEF1A2;EIF4G2;EIF4B;RAN;EIF1
Melanogenesis	5/101	0.128995	0.319231	0	0	1.92957	3.95172	GNAS;CTNNB1;CALM3;CALM1;CALM2
Chagas disease	5/102	0.132901	0.325607	0	0	1.90958	3.85382	CXCL8;PPP2R1A;IL1B;GNAS;CALR
Glioma	4/75	0.13647	0.330649	0	0	2.0859	4.1544	CDKN1A;CALM3;CALM1;CALM2
Hepatitis B	7/162	0.13788	0.330649	0	0	1.67444	3.31768	CDKN1A;CXCL8;YWHAQ;YWHAB;HSPG2;MMP9;YWHAZ
Ether lipid metabolism	3/49	0.139008	0.330649	0	0	2.41317	4.76173	PLPP2;PLD3;PAFAH1B1
C-type lectin receptor signaling pathway	5/104	0.140869	0.331855	0	0	1.87081	3.66665	IL1B;CALM3;CALM1;CALM2;RHOA
Vibrio cholerae infection	3/50	0.145161	0.338709	0	0	2.3617	4.55787	GNAS;ACTB;ACTG1
Biosynthesis of unsaturated fatty acids	2/27	0.15881	0.367061	0	0	2.95772	5.44234	FADS2;SCD
Focal adhesion	8/201	0.163591	0.374576	0	0	1.53679	2.78218	PPP1CB;SPP1;FLNA;CTNNB1;ACTN4;ACTB;RHOA;ACTG1
Ubiquitin mediated proteolysis	6/140	0.166159	0.376935	0	0	1.65878	2.97719	UBB;UBC;UBA1;RPS27A;UBA52;SKP1
Influenza A	7/172	0.170818	0.383949	0	0	1.57214	2.77821	CXCL10;CXCL8;HNRNPUL1;IL1B;ACTB;ACTG1;SLC25A6
TNF signaling pathway	5/112	0.174695	0.389093	0	0	1.73022	3.01875	CXCL10;MMP14;CCL20;IL1B;MMP9
Glutathione metabolism	3/57	0.190474	0.420415	0	0	2.05481	3.40738	GSTP1;MGST1;PRDX6
Colorectal cancer	4/86	0.192338	0.420739	0	0	1.80506	2.97565	APC2;CDKN1A;CTNNB1;RHOA
Endometrial cancer	3/58	0.19722	0.427601	0	0	2.01735	3.27504	APC2;CDKN1A;CTNNB1
Tuberculosis	7/180	0.199395	0.428525	0	0	1.49882	2.41679	IL1B;ITGB2;CALM3;CALM1;CALM2;CTSD;RHOA
ECM-receptor interaction	4/88	0.203185	0.432872	0	0	1.7619	2.80784	SV2A;SPP1;AGRN;HSPG2
AMPK signaling pathway	5/120	0.211259	0.445308	0	0	1.60919	2.50176	PPP2R1A;SCD;FASN;HMGCR;EEF2
cAMP signaling pathway	8/216	0.212944	0.445308	0	0	1.42485	2.20386	PPP1CB;GNAS;ATP2A2;ATP1A3;CALM3;CALM1;CALM2;RHOA
Thyroid hormone signaling pathway	5/121	0.215995	0.445308	0	0	1.59524	2.4447	ATP2A2;ATP1A3;CTNNB1;ACTB;ACTG1
Fructose and mannose metabolism	2/33	0.216293	0.445308	0	0	2.38452	3.651	TPI1;ALDOA
Platelet activation	5/124	0.230397	0.465369	0	0	1.55478	2.28234	PPP1CB;GNAS;ACTB;RHOA;ACTG1
Rheumatoid arthritis	4/93	0.231037	0.465369	0	0	1.66249	2.43585	CXCL8;CCL20;IL1B;ITGB2
Basal cell carcinoma	3/63	0.231735	0.465369	0	0	1.84876	2.70319	APC2;CDKN1A;CTNNB1
Synthesis and degradation of ketone bodies	1/10	0.234792	0.467675	0	0	4.10352	5.94623	HMGCS1
TGF-beta signaling pathway	4/94	0.236719	0.467711	0	0	1.64394	2.36872	PPP2R1A;ID4;RHOA;SKP1
Pathways in cancer	17/531	0.240977	0.472315	0	0	1.22704	1.74614	APC2;CDKN1A;HSP90AA1;HSP90AB1;CXCL8;GSTP1;MGST1;MMP9;RHOA;GNG2;GNB1;GNAS;CTNNB1;CALM3;CALM1;CALM2;SKP1
Transcriptional misregulation in cancer	7/192	0.245383	0.477134	0	0	1.40073	1.96793	CDKN1A;CXCL8;FUS;MLLT3;MMP9;PBX1;DUSP6
Dilated cardiomyopathy	4/96	0.248179	0.47877	0	0	1.60803	2.24096	GNAS;ATP2A2;ACTB;ACTG1
Phosphatidylinositol signaling system	4/97	0.253954	0.48535	0	0	1.59066	2.18016	PIP4K2B;CALM3;CALM1;CALM2
Thyroid cancer	2/37	0.255552	0.48535	0	0	2.11157	2.88088	CDKN1A;CTNNB1
Allograft rejection	2/38	0.265403	0.500183	0	0	2.05281	2.72306	HLA-B;HLA-A
Pancreatic secretion	4/102	0.283203	0.529655	0	0	1.50911	1.90388	GNAS;ATP2A2;ATP1A3;RHOA
Epstein-Barr virus infection	7/202	0.285968	0.530773	0	0	1.32821	1.66275	CXCL10;CDKN1A;HLA-B;HLA-A;CALR;VIM;B2M
Non-homologous end-joining	1/13	0.293842	0.533334	0	0	3.07717	3.76864	XRCC5
Ferroptosis	2/41	0.294929	0.533334	0	0	1.89461	2.31336	FTH1;FTL
Toll-like receptor signaling pathway	4/104	0.295046	0.533334	0	0	1.47878	1.80503	CXCL10;CXCL8;IL1B;SPP1
Non-small cell lung cancer	3/72	0.296055	0.533334	0	0	1.60687	1.9559	CDKN1A;KIF5C;KIF5A
MicroRNAs in cancer	10/310	0.304203	0.544012	0	0	1.23372	1.4682	APC2;CDKN1A;MARCKS;HNRNPK;FSCN1;VIM;MMP9;SOX4;RHOA;MCL1
NOD-like receptor signaling pathway	6/181	0.344487	0.611065	0	0	1.26745	1.35073	YWHAE;HSP90AA1;CXCL8;HSP90AB1;IL1B;RHOA
Serotonergic synapse	4/113	0.348911	0.611065	0	0	1.35605	1.42784	APP;GNG2;GNB1;GNAS
Axon guidance	6/182	0.34918	0.611065	0	0	1.26019	1.32593	DPYSL5;DPYSL2;CFL1;PLXNA1;L1CAM;RHOA
Pyruvate metabolism	2/47	0.353303	0.612365	0	0	1.64149	1.70785	LDHB;PKM
Glutamatergic synapse	4/114	0.354922	0.612365	0	0	1.34365	1.39183	SLC38A1;GNG2;GNB1;GNAS
Cocaine addiction	2/49	0.37241	0.633615	0	0	1.57147	1.55224	GNAS;CDK5R1
Sphingolipid metabolism	2/49	0.37241	0.633615	0	0	1.57147	1.55224	PSAP;PLPP2
Human papillomavirus infection	10/331	0.377373	0.63763	0	0	1.15175	1.1224	APC2;CDKN1A;PKM;PPP2R1A;HLA-B;SPP1;GNAS;CTNNB1;CHD4;HLA-A
Fatty acid biosynthesis	1/18	0.382324	0.641572	0	0	2.17156	2.08792	FASN
Cushing syndrome	5/155	0.389409	0.649016	0	0	1.23149	1.16144	APC2;CDKN1A;GNAS;CTNNB1;PBX1
Chemokine signaling pathway	6/192	0.396296	0.651121	0	0	1.19182	1.10314	CXCL10;CXCL8;GNG2;CCL20;GNB1;RHOA
Insulin secretion	3/86	0.397193	0.651121	0	0	1.33487	1.23253	GNAS;ATP1A3;VAMP2
Glycosaminoglycan degradation	1/19	0.398646	0.651121	0	0	2.05081	1.8861	IDS
Autoimmune thyroid disease	2/53	0.409903	0.665074	0	0	1.44792	1.29131	HLA-B;HLA-A
GABAergic synapse	3/89	0.418487	0.674535	0	0	1.28811	1.12208	SLC38A1;GNG2;GNB1
Bile secretion	3/90	0.425531	0.676981	0	0	1.27323	1.08787	GNAS;ATP1A3;HMGCR
Hypertrophic cardiomyopathy	3/90	0.425531	0.676981	0	0	1.27323	1.08787	ATP2A2;ACTB;ACTG1
Morphine addiction	3/91	0.432545	0.683701	0	0	1.2587	1.05488	GNG2;GNB1;GNAS
Relaxin signaling pathway	4/129	0.444318	0.697808	0	0	1.1815	0.958446	GNG2;GNB1;GNAS;MMP9
Protein export	1/23	0.459738	0.712885	0	0	1.67759	1.30365	HSPA5
Proximal tubule bicarbonate reclamation	1/23	0.459738	0.712885	0	0	1.67759	1.30365	ATP1A3
Long-term depression	2/60	0.472698	0.728372	0	0	1.27272	0.953643	PPP2R1A;GNAS
alpha-Linolenic acid metabolism	1/25	0.48792	0.747127	0	0	1.53763	1.10341	FADS2
Viral protein interaction with cytokine and cytokine receptor	3/100	0.494081	0.751862	0	0	1.14138	0.80474	CXCL10;CXCL8;CCL20
Cytosolic DNA-sensing pathway	2/63	0.498357	0.753688	0	0	1.20994	0.842646	CXCL10;IL1B
Measles	4/139	0.50184	0.7543	0	0	1.09341	0.753879	HSPA8;IL1B;RACK1;MSN
Fatty acid elongation	1/27	0.514634	0.764716	0	0	1.41921	0.942778	PPT1
Cortisol synthesis and secretion	2/65	0.515013	0.764716	0	0	1.1714	0.777301	GNAS;PBX1
Signaling pathways regulating pluripotency of stem cells	4/143	0.524121	0.773552	0	0	1.06173	0.68591	SOX2;APC2;ID4;CTNNB1
Butanoate metabolism	1/28	0.527465	0.773826	0	0	1.36658	0.87416	HMGCS1
Th17 cell differentiation	3/107	0.539563	0.781494	0	0	1.06418	0.656592	HSP90AA1;HSP90AB1;IL1B
Phospholipase D signaling pathway	4/148	0.551281	0.781494	0	0	1.0246	0.610158	CXCL8;GNAS;PLPP2;RHOA
Citrate cycle (TCA cycle)	1/30	0.55212	0.781494	0	0	1.2722	0.755672	ACLY
Pentose phosphate pathway	1/30	0.55212	0.781494	0	0	1.2722	0.755672	ALDOA
Central carbon metabolism in cancer	2/70	0.55502	0.781494	0	0	1.08499	0.63879	LDHB;PKM
Epithelial cell signaling in Helicobacter pylori infection	2/70	0.55502	0.781494	0	0	1.08499	0.63879	CXCL8;PTPRZ1
RIG-I-like receptor signaling pathway	2/70	0.55502	0.781494	0	0	1.08499	0.63879	CXCL10;CXCL8
Neutrophil extracellular trap formation	5/189	0.560825	0.785061	0	0	1.00216	0.579597	ITGB2;HMGB1;ACTB;ACTG1;SLC25A6
Circadian rhythm	1/31	0.563962	0.785061	0	0	1.22973	0.704349	SKP1
Ras signaling pathway	6/232	0.57754	0.795394	0	0	0.978842	0.537363	GNG2;GNB1;CALM3;CALM1;CALM2;RHOA
Inositol phosphate metabolism	2/73	0.577878	0.795394	0	0	1.03899	0.569772	TPI1;PIP4K2B
Base excision repair	1/33	0.586716	0.798586	0	0	1.15275	0.614663	HMGB1
SNARE interactions in vesicular transport	1/33	0.586716	0.798586	0	0	1.15275	0.614663	VAMP2
Propanoate metabolism	1/34	0.597645	0.807511	0	0	1.11776	0.575377	LDHB
Metabolism of xenobiotics by cytochrome P450	2/76	0.599865	0.807511	0	0	0.996712	0.50937	GSTP1;MGST1
Nicotinate and nicotinamide metabolism	1/35	0.608285	0.810157	0	0	1.08483	0.539282	NMNAT2
Calcium signaling pathway	6/240	0.610579	0.810157	0	0	0.944985	0.466205	GNAS;ATP2A2;CALM3;CALM1;CALM2;SLC25A6
Sphingolipid signaling pathway	3/119	0.611751	0.810157	0	0	0.953498	0.468577	PPP2R1A;CTSD;RHOA
Starch and sucrose metabolism	1/36	0.618645	0.814881	0	0	1.05378	0.506051	PGM2L1
African trypanosomiasis	1/37	0.628731	0.819356	0	0	1.02446	0.475402	IL1B
Aldosterone-regulated sodium reabsorption	1/37	0.628731	0.819356	0	0	1.02446	0.475402	ATP1A3
Wnt signaling pathway	4/166	0.641721	0.831861	0	0	0.909905	0.403635	APC2;CTNNB1;RHOA;SKP1
Various types of N-glycan biosynthesis	1/39	0.648111	0.835249	0	0	0.970438	0.420873	B4GALNT4
Osteoclast differentiation	3/127	0.655465	0.835249	0	0	0.891613	0.376626	JUND;IL1B;SQSTM1
Complement and coagulation cascades	2/85	0.660607	0.835249	0	0	0.888222	0.368254	ITGB2;PLAUR
ErbB signaling pathway	2/85	0.660607	0.835249	0	0	0.888222	0.368254	CDKN1A;NRG4
MAPK signaling pathway	7/294	0.661381	0.835249	0	0	0.898132	0.371311	HSPA8;JUND;IL1B;FLNA;MAPT;DUSP6;MAP4K4
Natural killer cell mediated cytotoxicity	3/131	0.675956	0.849278	0	0	0.863571	0.338198	ITGB2;HLA-B;HLA-A
Fat digestion and absorption	1/43	0.683894	0.854867	0	0	0.877835	0.333536	PLPP2
Autophagy	3/137	0.704983	0.876465	0	0	0.824648	0.288282	HMGB1;SQSTM1;CTSD
Type II diabetes mellitus	1/46	0.708326	0.876465	0	0	0.819186	0.282497	PKM
Carbohydrate digestion and absorption	1/47	0.716044	0.877682	0	0	0.801337	0.267657	ATP1A3
Valine, leucine and isoleucine degradation	1/48	0.723558	0.877682	0	0	0.784246	0.253762	HMGCS1
Glycerophospholipid metabolism	2/98	0.735007	0.877682	0	0	0.767427	0.236271	PLPP2;PLD3
Arginine and proline metabolism	1/50	0.737996	0.877682	0	0	0.752159	0.228518	CKB
Cholesterol metabolism	1/50	0.737996	0.877682	0	0	0.752159	0.228518	LRP1
Cysteine and methionine metabolism	1/50	0.737996	0.877682	0	0	0.752159	0.228518	LDHB
Hematopoietic cell lineage	2/99	0.740113	0.877682	0	0	0.759476	0.228566	IL1B;CD24
Ovarian steroidogenesis	1/51	0.744931	0.877682	0	0	0.737078	0.217043	GNAS
AGE-RAGE signaling pathway in diabetic complications	2/100	0.745134	0.877682	0	0	0.751688	0.22114	CXCL8;IL1B
Progesterone-mediated oocyte maturation	2/100	0.745134	0.877682	0	0	0.751688	0.22114	HSP90AA1;HSP90AB1
Breast cancer	3/147	0.748877	0.87787	0	0	0.766984	0.221797	APC2;CDKN1A;CTNNB1
Gastric cancer	3/149	0.757	0.882018	0	0	0.756399	0.210576	APC2;CDKN1A;CTNNB1
Chemical carcinogenesis	5/239	0.759615	0.882018	0	0	0.785982	0.2161	HSP90AA1;HSP90AB1;GSTP1;MGST1;GNAS
NF-kappa B signaling pathway	2/104	0.764394	0.883379	0	0	0.722061	0.193998	CXCL8;IL1B
Regulation of lipolysis in adipocytes	1/55	0.770883	0.886697	0	0	0.682339	0.177557	GNAS
mTOR signaling pathway	3/154	0.776381	0.888847	0	0	0.731164	0.185067	RPS6;RHOA;EIF4B
Drug metabolism	2/108	0.782378	0.891547	0	0	0.69467	0.170484	GSTP1;MGST1
Cholinergic synapse	2/113	0.803157	0.90465	0	0	0.663207	0.145379	GNG2;GNB1
JAK-STAT signaling pathway	3/162	0.804736	0.90465	0	0	0.694088	0.150785	CDKN1A;MCL1;GFAP
Glycerolipid metabolism	1/61	0.804954	0.90465	0	0	0.613915	0.133201	PLPP2
GnRH secretion	1/64	0.820043	0.917399	0	0	0.584591	0.115982	SPP1
Inflammatory bowel disease	1/65	0.824809	0.918537	0	0	0.575427	0.110829	IL1B
Acute myeloid leukemia	1/67	0.833966	0.924533	0	0	0.557932	0.101299	DUSP6
Renal cell carcinoma	1/69	0.842646	0.929947	0	0	0.541467	0.0927036	CDKN1A
Melanoma	1/72	0.854824	0.939156	0	0	0.518508	0.0813331	CDKN1A
p53 signaling pathway	1/73	0.85867	0.93917	0	0	0.51128	0.0779039	CDKN1A
Chronic myeloid leukemia	1/76	0.86961	0.942719	0	0	0.490753	0.0685634	CDKN1A
Pancreatic cancer	1/76	0.86961	0.942719	0	0	0.490753	0.0685634	CDKN1A
B cell receptor signaling pathway	1/81	0.885997	0.952863	0	0	0.459962	0.0556748	CD81
Peroxisome	1/82	0.889018	0.952863	0	0	0.45426	0.0534379	PRDX1
Cytokine-cytokine receptor interaction	5/295	0.892525	0.952863	0	0	0.63236	0.0718998	CXCL10;IL1RN;CXCL8;CCL20;IL1B
Spinocerebellar ataxia	2/143	0.894524	0.952863	0	0	0.52129	0.0581048	ATP2A2;SLC25A6
Small cell lung cancer	1/92	0.91517	0.970635	0	0	0.404133	0.0358243	CDKN1A
Staphylococcus aureus infection	1/95	0.921743	0.97262	0	0	0.391174	0.0318765	ITGB2
Choline metabolism in cancer	1/98	0.927807	0.97262	0	0	0.379018	0.0284005	PLPP2
Longevity regulating pathway	1/102	0.935169	0.97262	0	0	0.363932	0.0243938	HSPA8
Protein digestion and absorption	1/103	0.936889	0.97262	0	0	0.360345	0.0234911	ATP1A3
T cell receptor signaling pathway	1/104	0.938564	0.97262	0	0	0.356828	0.0226246	RHOA
Insulin resistance	1/108	0.94483	0.97262	0	0	0.343418	0.0194889	PPP1CB
Ribosome biogenesis in eukaryotes	1/108	0.94483	0.97262	0	0	0.343418	0.0194889	RAN
Toxoplasmosis	1/112	0.950459	0.97432	0	0	0.330974	0.0168169	HSPA8
Growth hormone synthesis, secretion and action	1/119	0.958965	0.978943	0	0	0.311228	0.0130407	GNAS
Purine metabolism	1/129	0.96865	0.981339	0	0	0.286765	0.009134	PKM
FoxO signaling pathway	1/131	0.970294	0.981339	0	0	0.282324	0.00851384	CDKN1A
Systemic lupus erythematosus	1/135	0.973328	0.981339	0	0	0.27384	0.00740307	ACTN4
Herpes simplex virus 1 infection	6/498	0.99153	0.995594	0	0	0.443417	0.00377166	PPP1CB;IL1B;HLA-B;HLA-A;CALR;B2M
Olfactory transduction	4/440	0.997384	0.997384	0	0	0.333287	0.000873011	GNB1;CALM3;CALM1;CALM2

## Sheet: Jensen DISEASES
Term	Overlap	P-value	Adjusted P-value	Old P-value	Old Adjusted P-value	Odds Ratio	Combined Score	Genes
Diamond-Blackfan anemia	11/15	4.85879e-15	2.85211e-12	0	0	103.553	3412.9	RPL5;RPS17;RPS28;RPS7;RPS19;RPL11;RPL35A;RPL26;RPL15;RPS10;RPS24
Spondylolysis	5/8	6.59839e-07	0.000193663	0	0	62.0427	882.946	PGRMC1;RPL32;FUS;RPL34;FTH1
Toxic encephalopathy	14/126	6.18631e-06	0.00121045	0	0	4.70817	56.4659	APP;HSPA5;ANXA5;SYP;GFAP;GAP43;MAP2;IL1B;CALM3;NEFM;MAPT;CALM1;CALM2;GAPDH
Ganglioglioma	5/12	8.5469e-06	0.00125426	0	0	26.5843	310.237	MAP2;H3F3A;SYP;ENO2;QKI
Neurodegenerative disease	22/293	1.1867e-05	0.00127413	0	0	3.08054	34.9387	APP;DYNC1H1;FUS;DCTN1;APLP1;ATN1;COX6A1;EEF2;UCHL1;CHCHD2;TRIM2;KIF5A;PPT1;KIF1B;MATR3;UBA1;KIF1A;MAPT;HNRNPA1;CTSD;SQSTM1;FTL
Periventricular nodular heterotopia	7/31	1.30235e-05	0.00127413	0	0	10.8874	122.47	DYNC1H1;TUBB2B;TUBA1A;KIF5C;DCX;FLNA;PAFAH1B1
Cerebrovascular disease	18/225	3.17803e-05	0.00265162	0	0	3.28474	34.0189	RPSA;SYP;HMGCR;ENO2;MMP9;RHOA;RTN4;GFAP;GAP43;TTR;MAP2;IL1B;DCX;CALM3;MAPT;CALM1;CALM2;NES
Arthritis	16/186	3.61379e-05	0.00265162	0	0	3.54816	36.2912	IL1RN;CCL20;ANXA5;HLA-B;HLA-A;HMGB1;HSPG2;MMP9;CXCL10;MMP14;RPS19;IL1B;SPP1;CHI3L1;TIMP1;B2M
Frontotemporal dementia	7/39	6.34551e-05	0.00413869	0	0	8.16219	78.889	YWHAQ;DCTN1;FUS;MATR3;HNRNPA1;INA;SQSTM1
Melanotic neuroectodermal tumor	3/5	0.000175844	0.010322	0	0	55.6286	480.96	RPLP1;SYP;ENO2
Spondylolisthesis	4/12	0.000200818	0.0107164	0	0	18.5725	158.11	RPL34;FTH1;IDS;PRRC2A
Brain ischemia	6/35	0.000278419	0.0115926	0	0	7.7063	63.0868	MAP2;IL1B;DCX;MMP9;NES;GFAP
Pick's disease	4/13	0.000284032	0.0115926	0	0	16.5081	134.812	UBB;YWHAQ;FUS;MAPT
Dementia	11/119	0.000316029	0.0115926	0	0	3.81481	30.7462	APP;TTR;YWHAQ;MAP2;FUS;IL1B;SNCG;SYP;MAPT;ENO2;GFAP
Sporotrichosis	3/6	0.000344783	0.0115926	0	0	37.0838	295.654	CALM3;CALM1;CALM2
Invasive aspergillosis	3/6	0.000344783	0.0115926	0	0	37.0838	295.654	MSMO1;CALM1;CALM2
Progressive supranuclear palsy	5/24	0.000352829	0.0115926	0	0	9.78817	77.8113	UBB;YWHAQ;FUS;DCTN1;UBA52
Intellectual disability	19/296	0.000355479	0.0115926	0	0	2.58669	20.5436	DYNC1H1;STXBP1;NONO;ZBTB20;SOX11;SYP;L1CAM;ACTB;SMARCA4;ACTG1;HNRNPK;PPP2R1A;EEF1A2;GNB1;IL1RAPL1;CTNNB1;KIF1A;SPTAN1;RBMX
Sertoli cell tumor	3/8	0.000927925	0.0279737	0	0	22.248	155.348	PRKAR1A;SYP;ENO2
Brain disease	8/77	0.000953108	0.0279737	0	0	4.3262	30.0921	APP;MAP2;IL1B;SYP;MAPT;ENO2;RTN4;GFAP
Nasopharynx carcinoma	3/9	0.00136466	0.0364117	0	0	18.539	122.299	HLA-A;WLS;IER3
Subependymal giant cell astrocytoma	3/9	0.00136466	0.0364117	0	0	18.539	122.299	SYP;ENO2;GFAP
Muckle-Wells syndrome	3/10	0.00191144	0.0487833	0	0	15.8898	99.4685	IL1RN;IL1B;ATN1
Mevalonic aciduria	3/11	0.00257696	0.0630281	0	0	13.9029	82.8769	IL1RN;IL1B;DHCR24
Paraplegia	7/73	0.00311217	0.0730738	0	0	3.9505	22.804	DYNC1H1;KIF5C;DCTN1;RPL34;KIF5A;KIF1A;L1CAM
Spinal stenosis	3/12	0.00336901	0.0760619	0	0	12.3575	70.3527	RPL34;FTH1;IDS
Pseudoachondroplasia	3/13	0.00429451	0.0871378	0	0	11.1211	60.6149	CALM3;CALM1;CALM2
Theileriasis	3/13	0.00429451	0.0871378	0	0	11.1211	60.6149	RPS8;RPS12;MAP4K4
Skin disease	5/41	0.00430494	0.0871378	0	0	5.16146	28.1196	UCHL1;FLNA;NCAM1;HLA-A;MMP9
Large intestine cancer	9/122	0.005091	0.0983142	0	0	2.97084	15.6869	RPS9;LRP1;PTPRZ1;CTNNB1;ANK2;KIF1B;HSPG2;PRPF8;SMARCA4
Stomach cancer	3/14	0.00535955	0.0983142	0	0	10.1096	52.8619	GNAS;ZBTB20;CTNNB1
inclusion-cell disease	3/14	0.00535955	0.0983142	0	0	10.1096	52.8619	MGEA5;PSAP;CTSD
Mixed connective tissue disease	3/15	0.00656946	0.11342	0	0	9.26667	46.568	HMGN2;HSPG2;RPL7
Long QT syndrome	3/15	0.00656946	0.11342	0	0	9.26667	46.568	ANK2;CALM3;CALM1
Fatty liver disease	7/85	0.00720395	0.12082	0	0	3.34067	16.4799	HSPA5;SCD;IL1B;FASN;PLIN2;HMGCR;SREBF2
Axonal neuropathy	3/17	0.00944159	0.139225	0	0	7.94204	37.0308	ATCAY;TRIM2;KIF1A
Chagas disease	4/32	0.00961382	0.139225	0	0	5.30098	24.6207	TPI1;CALR;WLS;FDFT1
Otitis externa	2/6	0.00972441	0.139225	0	0	18.5057	85.7391	CALM1;CALM2
Cushing's syndrome	2/6	0.00972441	0.139225	0	0	18.5057	85.7391	PRKAR1A;GNAS
Infantile onset spinocerebellar ataxia	2/6	0.00972441	0.139225	0	0	18.5057	85.7391	ATCAY;INA
Inverted papilloma	2/6	0.00972441	0.139225	0	0	18.5057	85.7391	MT2A;FSCN1
Immune system cancer	9/137	0.0106069	0.148244	0	0	2.62066	11.9142	DYNC1H1;BTG1;LRP1;CTNNB1;ANK2;CELSR2;B2M;SPTBN1;SMARCA4
Miller-Dieker lissencephaly syndrome	3/18	0.011111	0.151678	0	0	7.41219	33.3535	YWHAE;TUBA1A;PAFAH1B1
Pelizaeus-Merzbacher disease	3/19	0.0129398	0.153973	0	0	6.94857	30.2086	GPM6A;L1CAM;GPM6B
Spinal muscular atrophy	3/19	0.0129398	0.153973	0	0	6.94857	30.2086	KHDRBS1;HNRNPA1;PFN2
Myocardial infarction	2/7	0.0133776	0.153973	0	0	14.8038	63.8662	CELSR2;SMARCA4
Neurogenic bowel	2/7	0.0133776	0.153973	0	0	14.8038	63.8662	KIDINS220;RPL34
Onchocerciasis	2/7	0.0133776	0.153973	0	0	14.8038	63.8662	ONECUT3;CALR
Goldberg-Shprintzen syndrome	2/7	0.0133776	0.153973	0	0	14.8038	63.8662	STMN2;KIF1A
Hypervitaminosis A	2/7	0.0133776	0.153973	0	0	14.8038	63.8662	TTR;RPL22
Inclusion conjunctivitis	2/7	0.0133776	0.153973	0	0	14.8038	63.8662	TMBIM6;PLD3
Lung disease	8/119	0.0136733	0.154351	0	0	2.68344	11.5181	CXCL10;IL1RN;IL1B;CHI3L1;HMGB1;TIMP1;B2M;RHOA
Portal hypertension	3/20	0.01493	0.165356	0	0	6.5395	27.4946	PCSK1N;MSN;EVL
Lissencephaly	3/21	0.0170832	0.17739	0	0	6.17587	25.1337	TUBA1A;DCX;PAFAH1B1
Adenoma	2/8	0.0175275	0.17739	0	0	12.3359	49.8861	GNAS;CTNNB1
Choroid plexus papilloma	2/8	0.0175275	0.17739	0	0	12.3359	49.8861	TTR;GFAP
Primary pigmented nodular adrenocortical disease	2/8	0.0175275	0.17739	0	0	12.3359	49.8861	PRKAR1A;GNAS
Small intestine cancer	2/8	0.0175275	0.17739	0	0	12.3359	49.8861	GNAS;CTNNB1
Ureteral disease	3/22	0.0194005	0.19301	0	0	5.85053	23.0654	SPP1;S100A4;TIMP1
Lymphoid leukemia	9/152	0.0197284	0.19301	0	0	2.34395	9.20164	DYNC1H1;BTG1;LRP1;RPLP1;CTNNB1;CELSR2;B2M;SPTBN1;SMARCA4
Tetanus	5/60	0.0209031	0.201149	0	0	3.37511	13.0544	CALM3;CALM1;CALM2;VAMP2;EIF4G2
SAPHO syndrome	2/9	0.0221454	0.209667	0	0	10.5731	40.2847	IL1RN;KIF21B
Bone cancer	2/10	0.0272039	0.226048	0	0	9.25095	33.3441	GNAS;CTNNB1
Right bundle branch block	2/10	0.0272039	0.226048	0	0	9.25095	33.3441	SV2A;CHD4
Smith-Lemli-Opitz syndrome	2/10	0.0272039	0.226048	0	0	9.25095	33.3441	DHCR24;MSMO1
Stevens-Johnson syndrome	2/10	0.0272039	0.226048	0	0	9.25095	33.3441	HLA-B;HSPG2
Fibrous dysplasia	2/10	0.0272039	0.226048	0	0	9.25095	33.3441	PRKAR1A;GNAS
Irregular astigmatism	2/10	0.0272039	0.226048	0	0	9.25095	33.3441	RPS27;RPS18
Multiple endocrine neoplasia type 1	3/25	0.0273415	0.226048	0	0	5.05195	18.1837	JUND;PRKAR1A;GNAS
Essential tremor	3/25	0.0273415	0.226048	0	0	5.05195	18.1837	CHCHD2;FUS;VIM
Wiskott-Aldrich syndrome	3/25	0.0273415	0.226048	0	0	5.05195	18.1837	ACTR2;CFL1;FNBP1L
Meningitis	4/44	0.0283695	0.23129	0	0	3.7084	13.2109	CADM1;IL1B;ENO2;MMP9
Neuropathy	6/89	0.0303922	0.2428	0	0	2.68509	9.38053	DYNC1H1;TTR;TRIM2;KIF1B;KIF1A;COX6A1
Multiple sclerosis	11/219	0.0314705	0.2428	0	0	1.97054	6.81552	BAG6;RPL5;NDFIP1;ZMIZ1;TRIM2;HLA-B;KIF1B;HLA-A;YWHAG;IER3;PRRC2A
Myelomeningocele	2/11	0.0326766	0.2428	0	0	8.22264	28.1305	MARCKSL1;RPL34
Myoepithelioma	2/11	0.0326766	0.2428	0	0	8.22264	28.1305	PBX1;GFAP
Amyotrophic neuralgia	2/11	0.0326766	0.2428	0	0	8.22264	28.1305	SEPT11;KIF1B
Clostridium difficile colitis	2/11	0.0326766	0.2428	0	0	8.22264	28.1305	RHOA;CLASP2
Spondylosis	2/11	0.0326766	0.2428	0	0	8.22264	28.1305	RPL34;RPL24
Amyloidosis	3/27	0.0334566	0.245488	0	0	4.63048	15.7321	APP;TTR;B2M
Malignant hyperthermia	3/28	0.0367579	0.266381	0	0	4.44503	14.6837	CALM3;CALM1;CALM2
Migraine	2/12	0.0385381	0.272553	0	0	7.4	24.0952	LRP1;INA
Neuronal ceroid lipofuscinosis	2/12	0.0385381	0.272553	0	0	7.4	24.0952	PPT1;CTSD
Hemangioma	3/30	0.04384	0.295243	0	0	4.11534	12.8695	TCEB2;SYP;ENO2
Hemochromatosis	3/30	0.04384	0.295243	0	0	4.11534	12.8695	HLA-A;B2M;FTL
Amyotrophic lateral sclerosis type 5	2/13	0.0447642	0.295243	0	0	6.72693	20.8962	TRIM2;COX6A1
Neurogenic bladder	2/13	0.0447642	0.295243	0	0	6.72693	20.8962	KIDINS220;RPS24
Cryptosporidiosis	2/13	0.0447642	0.295243	0	0	6.72693	20.8962	TPI1;DBI
Gingivitis	2/13	0.0447642	0.295243	0	0	6.72693	20.8962	IL1B;SMARCA4
Charcot-Marie-Tooth disease	4/51	0.0453008	0.295462	0	0	3.15495	9.76276	DYNC1H1;TRIM2;KIF1B;COX6A1
Endometrial cancer	13/292	0.0471646	0.303818	0	0	1.7365	5.30346	DYNC1H1;LRP1;ANK2;CHD4;CELSR2;PRPF8;SFPQ;PPP2R1A;CSDE1;KIF5A;FLNA;CTNNB1;KIF1A
Pituitary adenoma	3/31	0.0476171	0.303818	0	0	3.96816	12.0813	PRKAR1A;GNAS;SYP
Biliary tract cancer	2/14	0.0513317	0.315197	0	0	6.16603	18.3097	GNAS;CTNNB1
Cryoglobulinemia	2/14	0.0513317	0.315197	0	0	6.16603	18.3097	CXCL10;CD81
Skin atrophy	2/14	0.0513317	0.315197	0	0	6.16603	18.3097	RPL13;HAS2
Peritonitis	3/32	0.0515484	0.315197	0	0	3.83113	11.3602	IL1B;HMGB1;B2M
Arthropathy	3/33	0.0556317	0.322397	0	0	3.70324	10.6987	IL1RN;IL1B;B2M
Degenerative disc disease	3/33	0.0556317	0.322397	0	0	3.70324	10.6987	FTH1;IL1B;TIMP1
Osteoporosis	7/130	0.0570502	0.322397	0	0	2.11356	6.05285	CDH2;CADM1;CTNNB1;MAPT;SPTBN1;WLS;RPS12
Aicardi syndrome	2/15	0.0582182	0.322397	0	0	5.69143	16.1839	FLNA;GPM6B
Antiphospholipid syndrome	2/15	0.0582182	0.322397	0	0	5.69143	16.1839	ACLY;ANXA5
Bowen-Conradi syndrome	2/15	0.0582182	0.322397	0	0	5.69143	16.1839	RPS19;RPS18
Pseudohypoparathyroidism	2/15	0.0582182	0.322397	0	0	5.69143	16.1839	PRKAR1A;GNAS
Gangliosidosis	2/15	0.0582182	0.322397	0	0	5.69143	16.1839	MGEA5;PSAP
Lambert-Eaton myasthenic syndrome	2/15	0.0582182	0.322397	0	0	5.69143	16.1839	SYT1;AGRN
McCune Albright syndrome	2/15	0.0582182	0.322397	0	0	5.69143	16.1839	PRKAR1A;GNAS
Urticaria	3/34	0.059864	0.328413	0	0	3.58359	10.0903	CD63;IL1RN;TPT1
Periodontitis	3/35	0.0642427	0.349011	0	0	3.47143	9.52938	IL1RN;IL1B;MMP9
Neurilemmoma	2/16	0.0654024	0.349011	0	0	5.28463	14.4122	PRKAR1A;GFAP
Gastrointestinal system disease	2/16	0.0654024	0.349011	0	0	5.28463	14.4122	NDRG4;ZMIZ1
Exanthem	3/36	0.0687645	0.357211	0	0	3.36606	9.01117	IL1RN;IL1B;HSPG2
Uveitis	3/36	0.0687645	0.357211	0	0	3.36606	9.01117	IL1RN;HLA-B;HLA-A
Leukopenia	3/36	0.0687645	0.357211	0	0	3.36606	9.01117	IL1B;NCAM1;B2M
Coffin-Siris syndrome	2/17	0.0728639	0.362196	0	0	4.93207	12.9179	SOX11;SMARCA4
Takayasu's arteritis	2/17	0.0728639	0.362196	0	0	4.93207	12.9179	RPS9;HLA-B
Testicular cancer	2/17	0.0728639	0.362196	0	0	4.93207	12.9179	CTNNB1;ADD2
Insulinoma	2/17	0.0728639	0.362196	0	0	4.93207	12.9179	RPS15;CPE
Periodontal disease	3/37	0.0734265	0.362196	0	0	3.26689	8.53139	CXCL10;CCL20;TIMP1
Idiopathic scoliosis	3/37	0.0734265	0.362196	0	0	3.26689	8.53139	CALM3;CALM1;CALM2
Thyroid cancer	2/18	0.080583	0.390927	0	0	4.62357	11.6443	GNAS;CTNNB1
Lymphatic system disease	2/18	0.080583	0.390927	0	0	4.62357	11.6443	IL1B;B2M
Hypertension	12/289	0.0827438	0.39812	0	0	1.61154	4.01596	MGEA5;RPS19;IL1B;SPP1;CALM3;CALM1;B2M;CALM2;MMP9;ACTB;RHOA;ADD2
Botulism	2/19	0.088541	0.409241	0	0	4.35138	10.549	SYT1;SV2A
Carney complex	2/19	0.088541	0.409241	0	0	4.35138	10.549	PRKAR1A;GNAS
Carpal tunnel syndrome	2/19	0.088541	0.409241	0	0	4.35138	10.549	TTR;B2M
Pertussis	2/19	0.088541	0.409241	0	0	4.35138	10.549	CALM3;CALM2
Legionnaires' disease	2/19	0.088541	0.409241	0	0	4.35138	10.549	ANK2;RAN
Aphasia	2/20	0.0967201	0.424891	0	0	4.10942	9.59934	MAPT;L1CAM
Behcet's disease	2/20	0.0967201	0.424891	0	0	4.10942	9.59934	HLA-B;HLA-A
Metachromatic leukodystrophy	1/4	0.101498	0.424891	0	0	12.3144	28.1717	PSAP
Globe disease	4/68	0.105	0.424891	0	0	2.31489	5.21728	FABP5;CHD4;SPTBN1;TPT1
Osteomyelitis	2/21	0.105103	0.424891	0	0	3.89294	8.77007	IL1RN;IL1B
Cerebellar ataxia	4/69	0.109273	0.424891	0	0	2.27915	5.04584	ATCAY;DPYSL5;DNER;ATP1A3
Candidiasis	3/44	0.109693	0.424891	0	0	2.70815	5.9852	HSP90AA1;IL1B;ENO1
Bipolar disorder	6/124	0.11057	0.424891	0	0	1.88525	4.15153	GPM6A;CDH2;ZMIZ1;HLA-B;HLA-A;HNRNPC
Rhinitis	2/22	0.113673	0.424891	0	0	3.6981	8.04125	CD63;IL1B
Gastroenteritis	3/45	0.115349	0.424891	0	0	2.64354	5.70949	BAG6;NONO;PLXNA1
Hepatitis	3/46	0.121113	0.424891	0	0	2.58193	5.45054	CXCL10;CPE;TIMP1
Choreatic disease	2/23	0.122415	0.424891	0	0	3.52182	7.39701	DPYSL5;FTL
Esophageal atresia	2/23	0.122415	0.424891	0	0	3.52182	7.39701	SOX2;KIDINS220
Acrodysostosis	1/5	0.125224	0.424891	0	0	9.23529	19.1878	GNAS
Acute promyelocytic leukemia	1/5	0.125224	0.424891	0	0	9.23529	19.1878	NPM1
Adrenal gland cancer	1/5	0.125224	0.424891	0	0	9.23529	19.1878	GNAS
Mucopolysaccharidosis II	1/5	0.125224	0.424891	0	0	9.23529	19.1878	IDS
Myelofibrosis	1/5	0.125224	0.424891	0	0	9.23529	19.1878	CALR
Ohdo syndrome	1/5	0.125224	0.424891	0	0	9.23529	19.1878	YWHAE
Autosomal recessive early-onset Parkinson disease 15	1/5	0.125224	0.424891	0	0	9.23529	19.1878	MAGED1
Parotitis	1/5	0.125224	0.424891	0	0	9.23529	19.1878	PGRMC1
Burkitt lymphoma	1/5	0.125224	0.424891	0	0	9.23529	19.1878	MAPRE2
Cervicitis	1/5	0.125224	0.424891	0	0	9.23529	19.1878	FLNA
Chromosome 13q14 deletion syndrome	1/5	0.125224	0.424891	0	0	9.23529	19.1878	SOX11
Chromosome 4q21 deletion syndrome	1/5	0.125224	0.424891	0	0	9.23529	19.1878	HNRNPD
Chronic NK-cell lymphocytosis	1/5	0.125224	0.424891	0	0	9.23529	19.1878	NCAM1
Progressive muscular atrophy	1/5	0.125224	0.424891	0	0	9.23529	19.1878	KIF5C
Prostatic adenoma	1/5	0.125224	0.424891	0	0	9.23529	19.1878	SLC25A6
Retinitis	1/5	0.125224	0.424891	0	0	9.23529	19.1878	ACTG1
Cutaneous anthrax	1/5	0.125224	0.424891	0	0	9.23529	19.1878	EEF1A1
DOID:3858	1/5	0.125224	0.424891	0	0	9.23529	19.1878	SMARCA4
Disseminated intravascular coagulation	1/5	0.125224	0.424891	0	0	9.23529	19.1878	MYH7B
Dowling-Degos disease	1/5	0.125224	0.424891	0	0	9.23529	19.1878	ATP2A2
Dracunculiasis	1/5	0.125224	0.424891	0	0	9.23529	19.1878	ONECUT3
Dressler's syndrome	1/5	0.125224	0.424891	0	0	9.23529	19.1878	CKB
Echolalia	1/5	0.125224	0.424891	0	0	9.23529	19.1878	LGALS1
Spiradenoma	1/5	0.125224	0.424891	0	0	9.23529	19.1878	PHLDA1
Splenic infarction	1/5	0.125224	0.424891	0	0	9.23529	19.1878	PCSK1N
Subclavian artery aneurysm	1/5	0.125224	0.424891	0	0	9.23529	19.1878	PCSK1N
Giant cell tumor	1/5	0.125224	0.424891	0	0	9.23529	19.1878	H3F3A
Goodpasture syndrome	1/5	0.125224	0.424891	0	0	9.23529	19.1878	RAN
pseudo-Hurler polydystrophy	1/5	0.125224	0.424891	0	0	9.23529	19.1878	CTSD
Hyperlysinemia	1/5	0.125224	0.424891	0	0	9.23529	19.1878	PTPRZ1
Hypochromic anemia	1/5	0.125224	0.424891	0	0	9.23529	19.1878	NDFIP1
Lethal midline granuloma	1/5	0.125224	0.424891	0	0	9.23529	19.1878	NCAM1
Lipoid proteinosis	1/5	0.125224	0.424891	0	0	9.23529	19.1878	HSPG2
Ankylosing spondylitis	2/24	0.131314	0.435329	0	0	3.36156	6.82453	HLA-B;KIF21B
Treacher Collins syndrome	2/24	0.131314	0.435329	0	0	3.36156	6.82453	RPS14;RPS28
Cataract	4/74	0.131759	0.435329	0	0	2.11581	4.28828	MSMO1;VIM;LSS;FTL
Hereditary spastic paraplegia	3/49	0.139008	0.435329	0	0	2.41317	4.76173	KIF5A;KIF1A;L1CAM
Astigmatism	2/25	0.140355	0.435329	0	0	3.21524	6.31339	SBK1;FLNA
Leukodystrophy	2/25	0.140355	0.435329	0	0	3.21524	6.31339	PSAP;GFAP
Lupus erythematosus	4/77	0.146091	0.435329	0	0	2.02855	3.90197	H1F0;HMGB1;RPS2;CALR
Chronic obstructive pulmonary disease	6/135	0.147657	0.435329	0	0	1.72351	3.29684	APP;SNRPN;LRP1;ANXA5;MAPT;VAT1L
Mouth disease	1/6	0.148323	0.435329	0	0	7.38786	14.0987	SPP1
Neuroaxonal dystrophy	1/6	0.148323	0.435329	0	0	7.38786	14.0987	SYT4
Aplastic anemia	1/6	0.148323	0.435329	0	0	7.38786	14.0987	RPS10
Paraganglioma	1/6	0.148323	0.435329	0	0	7.38786	14.0987	KIF1B
Chancroid	1/6	0.148323	0.435329	0	0	7.38786	14.0987	PRDX6
Chondroblastoma	1/6	0.148323	0.435329	0	0	7.38786	14.0987	H3F3A
Creutzfeldt-Jakob disease	1/6	0.148323	0.435329	0	0	7.38786	14.0987	STMN2
Dacryoadenitis	1/6	0.148323	0.435329	0	0	7.38786	14.0987	HSPG2
Dandy-Walker syndrome	1/6	0.148323	0.435329	0	0	7.38786	14.0987	NDUFA4
Scabies	1/6	0.148323	0.435329	0	0	7.38786	14.0987	FLNA
Skeletal muscle neoplasm	1/6	0.148323	0.435329	0	0	7.38786	14.0987	NACA
Spinocerebellar ataxia type 17	1/6	0.148323	0.435329	0	0	7.38786	14.0987	HSPA8
Epidermolysis bullosa acquisita	1/6	0.148323	0.435329	0	0	7.38786	14.0987	HSP90AA1
Ewing sarcoma	1/6	0.148323	0.435329	0	0	7.38786	14.0987	FUS
Exfoliation syndrome	1/6	0.148323	0.435329	0	0	7.38786	14.0987	MGST1
Vaginal discharge	1/6	0.148323	0.435329	0	0	7.38786	14.0987	FLNA
Vestibular neuronitis	1/6	0.148323	0.435329	0	0	7.38786	14.0987	EIF1
Infantile myofibromatosis	1/6	0.148323	0.435329	0	0	7.38786	14.0987	NDRG4
Lymphocele	1/6	0.148323	0.435329	0	0	7.38786	14.0987	RPL34
Liver disease	2/26	0.149525	0.435948	0	0	3.08112	5.85503	CDH2;FDFT1
Ovarian cancer	3/51	0.151402	0.435948	0	0	2.31238	4.36535	PPP2R1A;GNAS;CTNNB1
Oculocutaneous albinism	2/27	0.15881	0.435948	0	0	2.95772	5.44234	CD63;CANX
Brucellosis	2/27	0.15881	0.435948	0	0	2.95772	5.44234	RPL9;RPL7
Hyperhomocysteinemia	2/27	0.15881	0.435948	0	0	2.95772	5.44234	HSPA5;MMP9
Liver cancer	20/597	0.165189	0.435948	0	0	1.28925	2.32151	DYNC1H1;PTPRS;LRP1;CLTC;NRXN2;ANK2;HSPG2;CELSR2;SMARCA4;MAP2;MAP1B;FASN;GNAS;CTNNB1;TNRC18;KIF1B;NCAM1;KIF1A;NES;SPTBN1
Personality disorder	2/28	0.168199	0.435948	0	0	2.84381	5.06941	FLNA;RTN4
Dystonia	2/28	0.168199	0.435948	0	0	2.84381	5.06941	ATP1A3;ACTB
Motor peripheral neuropathy	1/7	0.170814	0.435948	0	0	6.15623	10.8792	NDRG4
Multiple personality disorder	1/7	0.170814	0.435948	0	0	6.15623	10.8792	PEG10
Mutism	1/7	0.170814	0.435948	0	0	6.15623	10.8792	ATP1A3
Alpha thalassemia	1/7	0.170814	0.435948	0	0	6.15623	10.8792	SMARCA4
Bacillary angiomatosis	1/7	0.170814	0.435948	0	0	6.15623	10.8792	RPL4
Baraitser-Winter syndrome	1/7	0.170814	0.435948	0	0	6.15623	10.8792	ACTB
Blau syndrome	1/7	0.170814	0.435948	0	0	6.15623	10.8792	ATN1
Peyronie's disease	1/7	0.170814	0.435948	0	0	6.15623	10.8792	PTN
Chordoma	1/7	0.170814	0.435948	0	0	6.15623	10.8792	RPS23
Chromosome 2p16.1-p15 deletion syndrome	1/7	0.170814	0.435948	0	0	6.15623	10.8792	RPS5
Chromosome Xp21 deletion syndrome	1/7	0.170814	0.435948	0	0	6.15623	10.8792	IL1RAPL1
Psoriatic arthritis	1/7	0.170814	0.435948	0	0	6.15623	10.8792	HLA-B
Sinoatrial node disease	1/7	0.170814	0.435948	0	0	6.15623	10.8792	MALAT1
Eczema herpeticum	1/7	0.170814	0.435948	0	0	6.15623	10.8792	ATP2A2
Endometrial stromal nodule	1/7	0.170814	0.435948	0	0	6.15623	10.8792	YWHAE
Eosinophilic meningitis	1/7	0.170814	0.435948	0	0	6.15623	10.8792	YWHAB
Esophageal carcinoma	1/7	0.170814	0.435948	0	0	6.15623	10.8792	CTNNB1
Farber lipogranulomatosis	1/7	0.170814	0.435948	0	0	6.15623	10.8792	PSAP
Glomerulonephritis	1/7	0.170814	0.435948	0	0	6.15623	10.8792	FTH1
Granular cell tumor	1/7	0.170814	0.435948	0	0	6.15623	10.8792	UCHL1
protein-energy malnutrition	1/7	0.170814	0.435948	0	0	6.15623	10.8792	TTR
Irritant dermatitis	1/7	0.170814	0.435948	0	0	6.15623	10.8792	FABP5
Cancer	11/300	0.171973	0.437004	0	0	1.41228	2.4862	MLLT11;NPM1;SET;BTG1;FUS;RUFY3;GNAS;MLLT3;RBMX;PBX1;RHOA
Multiple system atrophy	2/29	0.177679	0.443617	0	0	2.73835	4.73126	SNCG;MAPT
Polyneuropathy	2/29	0.177679	0.443617	0	0	2.73835	4.73126	TTR;KIF1B
Alopecia areata	3/56	0.183788	0.443617	0	0	2.09369	3.54666	BAG6;IER3;PRRC2A
Ataxia telangiectasia	2/30	0.187239	0.443617	0	0	2.64041	4.42367	CDKN1A;XRCC5
Congenital hemolytic anemia	2/30	0.187239	0.443617	0	0	2.64041	4.42367	TPI1;ALDOA
Hyperphosphatemia	2/30	0.187239	0.443617	0	0	2.64041	4.42367	SPP1;GNAS
Metanephric adenoma	1/8	0.192712	0.443617	0	0	5.2765	8.68805	NCAM1
Myelodysplastic syndrome	1/8	0.192712	0.443617	0	0	5.2765	8.68805	RPS14
Necrotizing fasciitis	1/8	0.192712	0.443617	0	0	5.2765	8.68805	RPS16
Olivopontocerebellar atrophy	1/8	0.192712	0.443617	0	0	5.2765	8.68805	MAP1B
Osteoblastoma	1/8	0.192712	0.443617	0	0	5.2765	8.68805	SPARC
Pigmented villonodular synovitis	1/8	0.192712	0.443617	0	0	5.2765	8.68805	LAPTM5
Schimke immuno-osseous dysplasia	1/8	0.192712	0.443617	0	0	5.2765	8.68805	SMARCA4
Developmental coordination disorder	1/8	0.192712	0.443617	0	0	5.2765	8.68805	RTN4
Dysembryoplastic neuroepithelial tumor	1/8	0.192712	0.443617	0	0	5.2765	8.68805	TUBB3
Erythema multiforme	1/8	0.192712	0.443617	0	0	5.2765	8.68805	HLA-A
Focal dermal hypoplasia	1/8	0.192712	0.443617	0	0	5.2765	8.68805	WLS
Glycerol kinase deficiency	1/8	0.192712	0.443617	0	0	5.2765	8.68805	IL1RAPL1
Hemorrhagic disease	1/8	0.192712	0.443617	0	0	5.2765	8.68805	CALR
Henoch-Schoenlein purpura	1/8	0.192712	0.443617	0	0	5.2765	8.68805	HSP90AA1
Hiatus hernia	1/8	0.192712	0.443617	0	0	5.2765	8.68805	ISLR2
Keratoconjunctivitis	1/8	0.192712	0.443617	0	0	5.2765	8.68805	PLD3
Lymphogranuloma venereum	1/8	0.192712	0.443617	0	0	5.2765	8.68805	TMBIM6
Malignant fibroxanthoma	1/8	0.192712	0.443617	0	0	5.2765	8.68805	RUFY3
Prader-Willi syndrome	3/58	0.19722	0.445523	0	0	2.01735	3.27504	SNRPN;MAGED1;IGFBP2
Rheumatoid arthritis	11/310	0.198745	0.445523	0	0	1.36434	2.2044	BAG6;FADS2;RBFOX2;RPS18;RPLP1;KIF5A;HLA-B;HLA-A;MLLT3;IER3;PRRC2A
Down syndrome	4/89	0.208675	0.445523	0	0	1.74109	2.72824	APP;TTC3;MAPT;DBN1
Asthenopia	1/9	0.214033	0.445523	0	0	4.6167	7.11721	CADM1
Ossifying fibroma	1/9	0.214033	0.445523	0	0	4.6167	7.11721	GNAS
Charcot-Marie-Tooth disease type 4	1/9	0.214033	0.445523	0	0	4.6167	7.11721	MYH7B
Pilomatrixoma	1/9	0.214033	0.445523	0	0	4.6167	7.11721	CTNNB1
Common variable immunodeficiency	1/9	0.214033	0.445523	0	0	4.6167	7.11721	CD81
Corneal ectasia	1/9	0.214033	0.445523	0	0	4.6167	7.11721	SBK1
Detrusor sphincter dyssynergia	1/9	0.214033	0.445523	0	0	4.6167	7.11721	RPS24
Sialadenitis	1/9	0.214033	0.445523	0	0	4.6167	7.11721	HSPG2
Spermatic cord torsion	1/9	0.214033	0.445523	0	0	4.6167	7.11721	SPTAN1
Esophageal varix	1/9	0.214033	0.445523	0	0	4.6167	7.11721	EVL
Gastroschisis	1/9	0.214033	0.445523	0	0	4.6167	7.11721	INA
Giardiasis	1/9	0.214033	0.445523	0	0	4.6167	7.11721	TPI1
Hailey-Hailey disease	1/9	0.214033	0.445523	0	0	4.6167	7.11721	ATP2A2
Herpes zoster	1/9	0.214033	0.445523	0	0	4.6167	7.11721	RPS24
Hidradenitis suppurativa	1/9	0.214033	0.445523	0	0	4.6167	7.11721	RPS28
locked-in syndrome	1/9	0.214033	0.445523	0	0	4.6167	7.11721	FUS
Hyperkalemic periodic paralysis	1/9	0.214033	0.445523	0	0	4.6167	7.11721	PTPRZ1
Hypersplenism	1/9	0.214033	0.445523	0	0	4.6167	7.11721	EVL
Hyperthyroxinemia	1/9	0.214033	0.445523	0	0	4.6167	7.11721	TTR
Hypophosphatasia	1/9	0.214033	0.445523	0	0	4.6167	7.11721	SPP1
IgA glomerulonephritis	1/9	0.214033	0.445523	0	0	4.6167	7.11721	HLA-A
Inclusion body myopathy with Paget disease of bone and frontotemporal dementia	1/9	0.214033	0.445523	0	0	4.6167	7.11721	SQSTM1
Inclusion body myositis	1/9	0.214033	0.445523	0	0	4.6167	7.11721	APP
Kindler syndrome	1/9	0.214033	0.445523	0	0	4.6167	7.11721	MSN
Hyperopia	2/33	0.216293	0.448635	0	0	2.38452	3.651	SBK1;TUBB3
Muscular atrophy	3/61	0.217787	0.450144	0	0	1.91271	2.91542	DYNC1H1;MAP1B;UBA1
Kidney disease	4/91	0.219779	0.452483	0	0	1.70089	2.57707	GNAS;NRXN2;CALM2;RPS12
Allergic hypersensitivity disease	5/123	0.225565	0.452483	0	0	1.56804	2.33504	MGEA5;CD63;IL1B;HSPG2;TPT1
Disease of mental health	2/34	0.226069	0.452483	0	0	2.30989	3.4346	SYT1;RPL9
Vitiligo	3/63	0.231735	0.452483	0	0	1.84876	2.70319	ZMIZ1;HLA-A;IER3
Acrocallosal syndrome	1/10	0.234792	0.452483	0	0	4.10352	5.94623	ACLY
Musculoskeletal system disease	1/10	0.234792	0.452483	0	0	4.10352	5.94623	HLA-B
Benign epilepsy with centrotemporal spikes	1/10	0.234792	0.452483	0	0	4.10352	5.94623	RBFOX2
Prostate carcinoma in situ	1/10	0.234792	0.452483	0	0	4.10352	5.94623	ALDOA
Congenital fibrosis of the extraocular muscles	1/10	0.234792	0.452483	0	0	4.10352	5.94623	KIF21B
Contagious pustular dermatitis	1/10	0.234792	0.452483	0	0	4.10352	5.94623	SERBP1
Decubitus ulcer	1/10	0.234792	0.452483	0	0	4.10352	5.94623	TTR
Epidermolytic hyperkeratosis	1/10	0.234792	0.452483	0	0	4.10352	5.94623	ATP2A2
Tethered spinal cord syndrome	1/10	0.234792	0.452483	0	0	4.10352	5.94623	KIDINS220
Thymoma	1/10	0.234792	0.452483	0	0	4.10352	5.94623	DPYSL5
Genital herpes	1/10	0.234792	0.452483	0	0	4.10352	5.94623	OST4
Glycoproteinosis	1/10	0.234792	0.452483	0	0	4.10352	5.94623	PSAP
chorea-acanthocytosis	1/10	0.234792	0.452483	0	0	4.10352	5.94623	ADD2
Hydranencephaly	1/10	0.234792	0.452483	0	0	4.10352	5.94623	TUBA1A
Krabbe disease	1/10	0.234792	0.452483	0	0	4.10352	5.94623	PSAP
Langerhans-cell histiocytosis	1/10	0.234792	0.452483	0	0	4.10352	5.94623	FSCN1
Hyperthyroidism	2/35	0.235877	0.452483	0	0	2.23977	3.23523	TTR;GNAS
Lipid metabolism disorder	2/35	0.235877	0.452483	0	0	2.23977	3.23523	HMGCR;CELSR2
Microsporidiosis	1/11	0.255004	0.46015	0	0	3.69298	5.04637	TPI1
Mucopolysaccharidosis	1/11	0.255004	0.46015	0	0	3.69298	5.04637	IDS
Newcastle disease	1/11	0.255004	0.46015	0	0	3.69298	5.04637	RPS15A
Pasteurellosis	1/11	0.255004	0.46015	0	0	3.69298	5.04637	RPS28
Campylobacteriosis	1/11	0.255004	0.46015	0	0	3.69298	5.04637	RPS21
Central sleep apnea	1/11	0.255004	0.46015	0	0	3.69298	5.04637	STMN3
Cervix uteri carcinoma in situ	1/11	0.255004	0.46015	0	0	3.69298	5.04637	MRFAP1
Rectal prolapse	1/11	0.255004	0.46015	0	0	3.69298	5.04637	KIDINS220
Cornea plana	1/11	0.255004	0.46015	0	0	3.69298	5.04637	SBK1
Dermatomyositis	1/11	0.255004	0.46015	0	0	3.69298	5.04637	HSPG2
Short QT syndrome	1/11	0.255004	0.46015	0	0	3.69298	5.04637	RPS5
Stiff-Person syndrome	1/11	0.255004	0.46015	0	0	3.69298	5.04637	DPYSL5
Esotropia	1/11	0.255004	0.46015	0	0	3.69298	5.04637	RPL18
Trigeminal neuralgia	1/11	0.255004	0.46015	0	0	3.69298	5.04637	PGRMC1
Wernicke encephalopathy	1/11	0.255004	0.46015	0	0	3.69298	5.04637	INA
Hirschsprung's disease	1/11	0.255004	0.46015	0	0	3.69298	5.04637	L1CAM
Histiocytosis	1/11	0.255004	0.46015	0	0	3.69298	5.04637	UCHL1
Intestinal benign neoplasm	1/11	0.255004	0.46015	0	0	3.69298	5.04637	CTNNB1
MASA syndrome	1/11	0.255004	0.46015	0	0	3.69298	5.04637	L1CAM
Acute cystitis	2/37	0.255552	0.46015	0	0	2.11157	2.88088	MGEA5;B2M
Schistosomiasis	2/38	0.265403	0.469693	0	0	2.05281	2.72306	TPI1;GAPDH
Human immunodeficiency virus infectious disease	3/69	0.27441	0.469693	0	0	1.68017	2.17269	CXCL10;HLA-B;NCAM1
Anal fistula	1/12	0.274682	0.469693	0	0	3.35708	4.33782	KIDINS220
Neutral lipid storage disease	1/12	0.274682	0.469693	0	0	3.35708	4.33782	PLIN2
Partial central choroid dystrophy	1/12	0.274682	0.469693	0	0	3.35708	4.33782	PRPF8
Pneumocystosis	1/12	0.274682	0.469693	0	0	3.35708	4.33782	ACTG1
Chronic intestinal vascular insufficiency	1/12	0.274682	0.469693	0	0	3.35708	4.33782	WLS
Sideroblastic anemia	1/12	0.274682	0.469693	0	0	3.35708	4.33782	PJA2
Duodenal ulcer	1/12	0.274682	0.469693	0	0	3.35708	4.33782	IL1RN
Ebstein anomaly	1/12	0.274682	0.469693	0	0	3.35708	4.33782	MAP6
Spastic ataxia	1/12	0.274682	0.469693	0	0	3.35708	4.33782	ATCAY
Spondyloepiphyseal dysplasia with congenital joint dislocations	1/12	0.274682	0.469693	0	0	3.35708	4.33782	SMARCA4
Esophageal cancer	1/12	0.274682	0.469693	0	0	3.35708	4.33782	RPL6
Waterhouse-Friderichsen syndrome	1/12	0.274682	0.469693	0	0	3.35708	4.33782	MVD
Lateral sclerosis	1/12	0.274682	0.469693	0	0	3.35708	4.33782	FUS
Amnestic disorder	2/39	0.275254	0.469693	0	0	1.99723	2.57654	RPL4;EIF4G2
Night blindness	2/39	0.275254	0.469693	0	0	1.99723	2.57654	PLIN2;PRPF8
Chondrodysplasia punctata	2/39	0.275254	0.469693	0	0	1.99723	2.57654	MSMO1;DHCR24
Optic atrophy	2/40	0.285098	0.479126	0	0	1.94457	2.44028	NR2F1;ATP1A3
Sensorineural hearing loss	4/103	0.289116	0.479126	0	0	1.49379	1.85369	IL1RN;RPS19;ATP1A3;ACTG1
Mucoepidermoid carcinoma	1/13	0.293842	0.479126	0	0	3.07717	3.76864	NUDT3
Neonatal jaundice	1/13	0.293842	0.479126	0	0	3.07717	3.76864	PKM
Babesiosis	1/13	0.293842	0.479126	0	0	3.07717	3.76864	RPS8
Basal cell carcinoma	1/13	0.293842	0.479126	0	0	3.07717	3.76864	PHLDA1
Parasitic helminthiasis infectious disease	1/13	0.293842	0.479126	0	0	3.07717	3.76864	IL1B
Chorioamnionitis	1/13	0.293842	0.479126	0	0	3.07717	3.76864	IL1B
Craniopharyngioma	1/13	0.293842	0.479126	0	0	3.07717	3.76864	CTNNB1
Dry eye syndrome	1/13	0.293842	0.479126	0	0	3.07717	3.76864	HSPG2
Transient cerebral ischemia	1/13	0.293842	0.479126	0	0	3.07717	3.76864	RPSA
Gingival recession	1/13	0.293842	0.479126	0	0	3.07717	3.76864	IL1B
Hemiplegia	1/13	0.293842	0.479126	0	0	3.07717	3.76864	ATP1A3
Hepatic encephalopathy	1/13	0.293842	0.479126	0	0	3.07717	3.76864	DBI
Imperforate anus	1/13	0.293842	0.479126	0	0	3.07717	3.76864	KIDINS220
Koolen de Vries syndrome	1/13	0.293842	0.479126	0	0	3.07717	3.76864	MAPT
Pancreatic cancer	5/137	0.295501	0.480496	0	0	1.40072	1.70759	LRP1;GNAS;CTNNB1;ANK2;SMARCA4
Common cold	2/42	0.304739	0.489162	0	0	1.84715	2.19496	IL1B;MMP9
Antley-Bixler syndrome	1/14	0.312497	0.489162	0	0	2.84032	3.30374	DHCR24
Bacterial vaginosis	1/14	0.312497	0.489162	0	0	2.84032	3.30374	IL1B
Pericarditis	1/14	0.312497	0.489162	0	0	2.84032	3.30374	IL1RN
Prostatitis	1/14	0.312497	0.489162	0	0	2.84032	3.30374	IL1B
Radiculopathy	1/14	0.312497	0.489162	0	0	2.84032	3.30374	RPL34
Scrapie	1/14	0.312497	0.489162	0	0	2.84032	3.30374	RPSA
Enamel erosion	1/14	0.312497	0.489162	0	0	2.84032	3.30374	SMARCA4
Facial paralysis	1/14	0.312497	0.489162	0	0	2.84032	3.30374	CADM1
Fibrodysplasia ossificans progressiva	1/14	0.312497	0.489162	0	0	2.84032	3.30374	GNAS
Gas gangrene	1/14	0.312497	0.489162	0	0	2.84032	3.30374	CPE
Hereditary spherocytosis	1/14	0.312497	0.489162	0	0	2.84032	3.30374	ANK2
Interstitial lung disease	1/14	0.312497	0.489162	0	0	2.84032	3.30374	MAPT
Kennedy's disease	1/14	0.312497	0.489162	0	0	2.84032	3.30374	DNAJA1
Angelman syndrome	2/44	0.324278	0.501543	0	0	1.75901	1.98091	SNRPN;IGFBP2
Cardiovascular system disease	8/246	0.324927	0.501543	0	0	1.24331	1.39767	FADS2;CDH2;PRKAR1A;RPLP1;IL1RAPL1;HMGCR;CELSR2;SMARCA4
Mitral valve insufficiency	1/15	0.33066	0.501543	0	0	2.6373	2.91861	ATP5A1
Myasthenia gravis	1/15	0.33066	0.501543	0	0	2.6373	2.91861	AGRN
Panic disorder	1/15	0.33066	0.501543	0	0	2.6373	2.91861	RAN
Peeling skin syndrome	1/15	0.33066	0.501543	0	0	2.6373	2.91861	RPL41
Placental insufficiency	1/15	0.33066	0.501543	0	0	2.6373	2.91861	LGALS1
Plague	1/15	0.33066	0.501543	0	0	2.6373	2.91861	GAP43
Shigellosis	1/15	0.33066	0.501543	0	0	2.6373	2.91861	IL1B
Tracheal stenosis	1/15	0.33066	0.501543	0	0	2.6373	2.91861	PGRMC1
interleukin-7 receptor alpha deficiency	1/15	0.33066	0.501543	0	0	2.6373	2.91861	RPL5
Leptospirosis	1/15	0.33066	0.501543	0	0	2.6373	2.91861	RPLP2
Williams-Beuren syndrome	2/45	0.333996	0.503998	0	0	1.71801	1.88402	WBSCR22;YWHAG
Keratoconus	2/45	0.333996	0.503998	0	0	1.71801	1.88402	FLNA;TIMP1
Essential hypertension	3/78	0.339559	0.507389	0	0	1.47787	1.59626	BAG6;MAP4;RPL6
Mastitis	2/46	0.343672	0.507389	0	0	1.67888	1.79316	MGEA5;IL1B
Aceruloplasminemia	1/16	0.348344	0.507389	0	0	2.46135	2.59566	FTL
Myotonic dystrophy type 1	1/16	0.348344	0.507389	0	0	2.46135	2.59566	MYH7B
Neuromyelitis optica	1/16	0.348344	0.507389	0	0	2.46135	2.59566	DPYSL5
Oppositional defiant disorder	1/16	0.348344	0.507389	0	0	2.46135	2.59566	RTN4
Pathological gambling	1/16	0.348344	0.507389	0	0	2.46135	2.59566	RTN4
Shwachman-Diamond syndrome	1/16	0.348344	0.507389	0	0	2.46135	2.59566	RPS14
Tick infestation	1/16	0.348344	0.507389	0	0	2.46135	2.59566	MAP1B
Fibromyalgia	1/16	0.348344	0.507389	0	0	2.46135	2.59566	NCAM1
Tuberous sclerosis	1/16	0.348344	0.507389	0	0	2.46135	2.59566	DCX
Variant Creutzfeldt-Jakob disease	1/16	0.348344	0.507389	0	0	2.46135	2.59566	STMN2
Varicose veins	1/16	0.348344	0.507389	0	0	2.46135	2.59566	EVL
Left ventricular noncompaction	1/16	0.348344	0.507389	0	0	2.46135	2.59566	YWHAE
Gilles de la Tourette syndrome	2/48	0.362884	0.519575	0	0	1.60572	1.62768	RTN4;ADD2
Basal ganglia calcification	1/17	0.365561	0.519575	0	0	2.3074	2.32199	XPR1
Papilloma	1/17	0.365561	0.519575	0	0	2.3074	2.32199	SYP
Pleomorphic adenoma	1/17	0.365561	0.519575	0	0	2.3074	2.32199	GFAP
Colorectal cancer	1/17	0.365561	0.519575	0	0	2.3074	2.32199	NDRG4
Conjunctivitis	1/17	0.365561	0.519575	0	0	2.3074	2.32199	PLD3
Stomatitis	1/17	0.365561	0.519575	0	0	2.3074	2.32199	HN1
Generalized anxiety disorder	1/17	0.365561	0.519575	0	0	2.3074	2.32199	DYNLL2
relapsing-remitting multiple sclerosis	1/17	0.365561	0.519575	0	0	2.3074	2.32199	ELAVL3
Macroglobulinemia	1/17	0.365561	0.519575	0	0	2.3074	2.32199	B2M
Diarrhea	5/151	0.368427	0.522383	0	0	1.26549	1.26361	BAG6;TPI1;TTR;IL1B;CPE
Encephalitis	2/49	0.37241	0.523134	0	0	1.57147	1.55224	CXCL10;DPYSL5
Brachydactyly	2/50	0.381879	0.523134	0	0	1.53866	1.48119	PRKAR1A;GNAS
Autistic disorder	1/18	0.382324	0.523134	0	0	2.17156	2.08792	MARCKS
Perinatal necrotizing enterocolitis	1/18	0.382324	0.523134	0	0	2.17156	2.08792	IL1B
Progressive relapsing multiple sclerosis	1/18	0.382324	0.523134	0	0	2.17156	2.08792	ATN1
Deafness dystonia syndrome	1/18	0.382324	0.523134	0	0	2.17156	2.08792	ATP1A3
Endocarditis	1/18	0.382324	0.523134	0	0	2.17156	2.08792	ISLR2
Epidermodysplasia verruciformis	1/18	0.382324	0.523134	0	0	2.17156	2.08792	DCAF7
Eye and adnexa disease	1/18	0.382324	0.523134	0	0	2.17156	2.08792	USP11
Thyrotoxicosis	1/18	0.382324	0.523134	0	0	2.17156	2.08792	HLA-A
Goldenhar syndrome	1/18	0.382324	0.523134	0	0	2.17156	2.08792	COX6A1
Von Willebrand's disease	1/18	0.382324	0.523134	0	0	2.17156	2.08792	NONO
Kallmann syndrome	1/18	0.382324	0.523134	0	0	2.17156	2.08792	DUSP6
Lipoma	1/18	0.382324	0.523134	0	0	2.17156	2.08792	KIDINS220
Machado-Joseph disease	1/18	0.382324	0.523134	0	0	2.17156	2.08792	ATN1
Blepharophimosis	1/19	0.398646	0.536709	0	0	2.05081	1.8861	HSPG2
Pellagra	1/19	0.398646	0.536709	0	0	2.05081	1.8861	GAPDH
Pelvic inflammatory disease	1/19	0.398646	0.536709	0	0	2.05081	1.8861	MAPT
Chlamydia	1/19	0.398646	0.536709	0	0	2.05081	1.8861	IL1B
Dengue disease	1/19	0.398646	0.536709	0	0	2.05081	1.8861	CXCL10
Spinocerebellar ataxia type 2	1/19	0.398646	0.536709	0	0	2.05081	1.8861	ATN1
Glycogen storage disease	1/19	0.398646	0.536709	0	0	2.05081	1.8861	ALDOA
Cognitive disorder	2/52	0.400629	0.538144	0	0	1.47696	1.351	PTN;VAT1L
Type 1 diabetes mellitus	5/158	0.405119	0.54074	0	0	1.20715	1.09075	BAG6;TUBB;HLA-B;IER3;PRRC2A
Orofacial cleft	2/53	0.409903	0.54074	0	0	1.44792	1.29131	TTR;CADM1
Nephritis	1/20	0.414537	0.54074	0	0	1.94277	1.7108	RPS2
Osteogenesis imperfecta	1/20	0.414537	0.54074	0	0	1.94277	1.7108	SPARC
Progeria	1/20	0.414537	0.54074	0	0	1.94277	1.7108	ZMPSTE24
Congenital myasthenic syndrome	1/20	0.414537	0.54074	0	0	1.94277	1.7108	AGRN
Root resorption	1/20	0.414537	0.54074	0	0	1.94277	1.7108	IL1B
Diastrophic dysplasia	1/20	0.414537	0.54074	0	0	1.94277	1.7108	RPS14
Eating disorder	1/20	0.414537	0.54074	0	0	1.94277	1.7108	RTN4
Smallpox	1/20	0.414537	0.54074	0	0	1.94277	1.7108	CAPRIN1
Endometritis	1/20	0.414537	0.54074	0	0	1.94277	1.7108	IL1B
Tularemia	1/20	0.414537	0.54074	0	0	1.94277	1.7108	FTL
dentatorubral-pallidoluysian atrophy	1/20	0.414537	0.54074	0	0	1.94277	1.7108	ATN1
Type 2 diabetes mellitus	8/269	0.41669	0.542343	0	0	1.13239	0.99131	BTG1;SNRPN;SYT1;IL1B;ZBTB20;NMNAT2;COX6A1;RPL6
Autonomic neuropathy	1/21	0.430008	0.548728	0	0	1.84554	1.55755	TTR
Brain edema	1/21	0.430008	0.548728	0	0	1.84554	1.55755	MMP9
Cardiac arrest	1/21	0.430008	0.548728	0	0	1.84554	1.55755	ENO2
Peutz-Jeghers syndrome	1/21	0.430008	0.548728	0	0	1.84554	1.55755	PRKAR1A
Congestive heart failure	1/21	0.430008	0.548728	0	0	1.84554	1.55755	GPM6A
Spinal cord disease	1/21	0.430008	0.548728	0	0	1.84554	1.55755	HNRNPA1
Syphilis	1/21	0.430008	0.548728	0	0	1.84554	1.55755	TTC3
Varicocele	1/21	0.430008	0.548728	0	0	1.84554	1.55755	CIRBP
Hypoparathyroidism	1/21	0.430008	0.548728	0	0	1.84554	1.55755	GNAS
Asthma	3/92	0.439528	0.557051	0	0	1.24449	1.02304	TOP2A;NDFIP1;NUCKS1
DOID:2627	3/92	0.439528	0.557051	0	0	1.24449	1.02304	H3F3A;ANK2;HSPG2
Agammaglobulinemia	1/22	0.445072	0.557051	0	0	1.75757	1.42279	CD81
Nephroblastoma	1/22	0.445072	0.557051	0	0	1.75757	1.42279	BASP1
Chediak-Higashi syndrome	1/22	0.445072	0.557051	0	0	1.75757	1.42279	MYO5A
Congenital nystagmus	1/22	0.445072	0.557051	0	0	1.75757	1.42279	MSN
Schnyder corneal dystrophy	1/22	0.445072	0.557051	0	0	1.75757	1.42279	CLSTN1
Gaucher's disease	1/22	0.445072	0.557051	0	0	1.75757	1.42279	PSAP
VACTERL association	1/22	0.445072	0.557051	0	0	1.75757	1.42279	KIDINS220
Hydrocephalus	2/57	0.446265	0.557356	0	0	1.34234	1.08306	L1CAM;NES
Heart disease	3/94	0.453393	0.565057	0	0	1.21702	0.962656	RPL3;PKIA;TRIB2
Vasculitis	2/58	0.455159	0.566056	0	0	1.31831	1.03765	IL1RN;IL1B
Ameloblastoma	1/23	0.459738	0.566946	0	0	1.67759	1.30365	MMP9
Ankylosis	1/23	0.459738	0.566946	0	0	1.67759	1.30365	SPP1
Polycythemia vera	1/23	0.459738	0.566946	0	0	1.67759	1.30365	CALR
Diphtheria	1/23	0.459738	0.566946	0	0	1.67759	1.30365	EEF2
Amblyopia	1/24	0.474017	0.577278	0	0	1.60457	1.19783	SBK1
Connective tissue disease	1/24	0.474017	0.577278	0	0	1.60457	1.19783	CTNNB1
Severe acute respiratory syndrome	1/24	0.474017	0.577278	0	0	1.60457	1.19783	CXCL10
Gastroesophageal reflux disease	1/24	0.474017	0.577278	0	0	1.60457	1.19783	ISLR2
Hypotrichosis	1/24	0.474017	0.577278	0	0	1.60457	1.19783	RPL21
Mastocytosis	1/24	0.474017	0.577278	0	0	1.60457	1.19783	CD63
Parkinson's disease	3/99	0.487402	0.584508	0	0	1.15333	0.828863	NUCKS1;MAPT;GPM6B
Influenza	3/99	0.487402	0.584508	0	0	1.15333	0.828863	IFITM3;CXCL10;IL1B
Apraxia	1/25	0.48792	0.584508	0	0	1.53763	1.10341	MAPT
Peripheral neuropathy	1/25	0.48792	0.584508	0	0	1.53763	1.10341	KIF1A
Primary biliary cirrhosis	1/25	0.48792	0.584508	0	0	1.53763	1.10341	RPL3
Collagen disease	1/25	0.48792	0.584508	0	0	1.53763	1.10341	IL1B
Familial adenomatous polyposis	1/25	0.48792	0.584508	0	0	1.53763	1.10341	CTNNB1
Lyme disease	1/25	0.48792	0.584508	0	0	1.53763	1.10341	YBX1
Pain agnosia	3/101	0.500717	0.595859	0	0	1.12968	0.781416	RPL34;IL1B;AP2M1
Retinal detachment	1/26	0.501456	0.595859	0	0	1.47605	1.01883	GFAP
Vesicoureteral reflux	1/26	0.501456	0.595859	0	0	1.47605	1.01883	MGEA5
Klinefelter's syndrome	1/26	0.501456	0.595859	0	0	1.47605	1.01883	DUSP6
Microphthalmia	1/27	0.514634	0.607828	0	0	1.41921	0.942778	SOX2
Autosomal dominant cerebellar ataxia	1/27	0.514634	0.607828	0	0	1.41921	0.942778	EEF2
Synovitis	1/27	0.514634	0.607828	0	0	1.41921	0.942778	IL1B
3-methylglutaconic aciduria	1/28	0.527465	0.61433	0	0	1.36658	0.87416	ATP5E
Acromegaly	1/28	0.527465	0.61433	0	0	1.36658	0.87416	PRKAR1A
Age related macular degeneration	1/28	0.527465	0.61433	0	0	1.36658	0.87416	MAP2
Congenital adrenal hyperplasia	1/28	0.527465	0.61433	0	0	1.36658	0.87416	HLA-B
ENSP00000256078	1/28	0.527465	0.61433	0	0	1.36658	0.87416	CTNNB1
Turner syndrome	1/28	0.527465	0.61433	0	0	1.36658	0.87416	RPS4X
Lipodystrophy	1/28	0.527465	0.61433	0	0	1.36658	0.87416	ZMPSTE24
Toxic shock syndrome	1/29	0.539958	0.626394	0	0	1.3177	0.812053	IL1B
Werner syndrome	1/29	0.539958	0.626394	0	0	1.3177	0.812053	XRCC5
Gout	2/69	0.547208	0.633553	0	0	1.10124	0.663968	NRXN2;PJA2
DOID:9917	1/30	0.55212	0.634236	0	0	1.2722	0.755672	CTNNB1
Specific language impairment	1/30	0.55212	0.634236	0	0	1.2722	0.755672	CELF3
Uterine fibroid	1/30	0.55212	0.634236	0	0	1.2722	0.755672	S100A6
Hypopituitarism	1/30	0.55212	0.634236	0	0	1.2722	0.755672	SOX2
Metabolic syndrome X	1/31	0.563962	0.641562	0	0	1.22973	0.704349	FADS2
Bronchitis	1/31	0.563962	0.641562	0	0	1.22973	0.704349	IL1B
Calcinosis	1/31	0.563962	0.641562	0	0	1.22973	0.704349	SPP1
Disease of anatomical entity	1/31	0.563962	0.641562	0	0	1.22973	0.704349	ATP9A
Fragile X syndrome	1/31	0.563962	0.641562	0	0	1.22973	0.704349	MAP1B
Otitis media	1/33	0.586716	0.66194	0	0	1.15275	0.614663	IL1B
Cholera	1/33	0.586716	0.66194	0	0	1.15275	0.614663	NONO
Sarcoma	1/33	0.586716	0.66194	0	0	1.15275	0.614663	KIDINS220
obsessive-compulsive disorder	1/33	0.586716	0.66194	0	0	1.15275	0.614663	RTN4
Ulcerative colitis	3/115	0.588548	0.66194	0	0	0.987755	0.523605	ARPC2;KIF21B;HLA-A
Alzheimer's disease	5/195	0.588642	0.66194	0	0	0.970212	0.514152	BASP1;S100A6;HAS2;NCAM1;HMGB1
Breast cancer	11/434	0.597496	0.668224	0	0	0.958151	0.493456	DYNC1H1;LRP1;ZMIZ1;H3F3A;FLNA;CTNNB1;ANK2;BUB3;HSPG2;SPTAN1;SMARCA4
Retinal degeneration	1/34	0.597645	0.668224	0	0	1.11776	0.575377	NES
Dyspepsia	1/34	0.597645	0.668224	0	0	1.11776	0.575377	SEPT3
Huntington's disease	2/76	0.599865	0.669431	0	0	0.996712	0.50937	ATN1;GFAP
Psoriasis	1/35	0.608285	0.676257	0	0	1.08483	0.539282	HLA-B
Pulmonary embolism	1/35	0.608285	0.676257	0	0	1.08483	0.539282	NONO
Attention deficit hyperactivity disorder	3/119	0.611751	0.678824	0	0	0.953498	0.468577	SYT4;NCL;MAP1B
Vascular disease	2/78	0.614038	0.678944	0	0	0.970382	0.473254	TSC22D1;CELSR2
Lung cancer	10/400	0.614173	0.678944	0	0	0.94456	0.460453	RTN1;CDH2;PTPRZ1;DNER;GNAS;CTNNB1;KIF1B;LCP1;NES;SMARCA4
Bilirubin metabolic disorder	1/36	0.618645	0.682602	0	0	1.05378	0.506051	PKM
Major depressive disorder	2/79	0.620979	0.683892	0	0	0.95773	0.456319	IL1B;RTN4
Leigh disease	1/37	0.628731	0.691133	0	0	1.02446	0.475402	NDUFA4
Coronary artery disease	5/205	0.632775	0.694278	0	0	0.921224	0.421589	IL1B;SPP1;HMGCR;CELSR2;MMP9
Neurofibromatosis	1/38	0.63855	0.695415	0	0	0.996718	0.447083	MSN
Constipation	1/38	0.63855	0.695415	0	0	0.996718	0.447083	KIDINS220
post-traumatic stress disorder	1/38	0.63855	0.695415	0	0	0.996718	0.447083	RTN4
Hyperparathyroidism	1/38	0.63855	0.695415	0	0	0.996718	0.447083	B2M
Retinitis pigmentosa	2/83	0.64778	0.69934	0	0	0.910247	0.395234	SNRNP200;PRPF8
Systemic lupus erythematosus	2/83	0.64778	0.69934	0	0	0.910247	0.395234	NMNAT2;SEZ6L2
Rickets	1/39	0.648111	0.69934	0	0	0.970438	0.420873	SPP1
Scoliosis	1/39	0.648111	0.69934	0	0	0.970438	0.420873	RPL34
Keratitis	1/39	0.648111	0.69934	0	0	0.970438	0.420873	GDI1
Pancreatitis	2/84	0.654241	0.704659	0	0	0.8991	0.38147	IL1B;HMGB1
Macular degeneration	1/40	0.657419	0.706785	0	0	0.945507	0.396578	IER3
Gastritis	1/43	0.683894	0.733904	0	0	0.877835	0.333536	IL1RN
Beckwith-Wiedemann syndrome	1/45	0.700399	0.748879	0	0	0.837847	0.298361	GNAS
Thalassemia	1/45	0.700399	0.748879	0	0	0.837847	0.298361	H3F3A
Atrial fibrillation	1/46	0.708326	0.755978	0	0	0.819186	0.282497	GAP43
Peripheral vascular disease	1/47	0.716044	0.762828	0	0	0.801337	0.267657	NRG4
Thrombocytopenia	2/95	0.719178	0.764778	0	0	0.792305	0.261181	NCAM1;B2M
Dental caries	1/49	0.730874	0.77581	0	0	0.767868	0.240738	TRIB2
Irritable bowel syndrome	1/50	0.737996	0.781956	0	0	0.752159	0.228518	IL1B
Metabolic acidosis	1/51	0.744931	0.787881	0	0	0.737078	0.217043	RPS21
Atherosclerosis	1/52	0.751682	0.792167	0	0	0.722588	0.206257	CELSR2
Substance abuse	1/52	0.751682	0.792167	0	0	0.722588	0.206257	RTN4
Amenorrhea	1/53	0.758254	0.794813	0	0	0.708656	0.196111	RPL24
Nicotine dependence	1/53	0.758254	0.794813	0	0	0.708656	0.196111	ATP9A
Polycystic kidney disease	1/53	0.758254	0.794813	0	0	0.708656	0.196111	CTNNB1
Cone dystrophy	1/54	0.764653	0.800092	0	0	0.695249	0.186558	PRPF8
Prostate cancer	2/105	0.769007	0.803215	0	0	0.715013	0.187802	PKIA;ANK2
Hyperglycemia	2/108	0.782378	0.81573	0	0	0.69467	0.170484	SCD;IL1B
Crohn's disease	5/248	0.787025	0.81912	0	0	0.756517	0.181182	NDFIP1;ZMIZ1;KIF21B;YWHAZ;RHOA
Cryptorchidism	1/58	0.788603	0.819309	0	0	0.646326	0.153498	CIRBP
Acquired metabolic disease	7/338	0.792095	0.821484	0	0	0.776957	0.181088	RPS14;DPYSL5;ZMIZ1;HMGA1;MSMO1;NUDT3;PBX1
Pneumonia	1/64	0.820043	0.848968	0	0	0.584591	0.115982	MMP9
Eosinophilia	1/66	0.829449	0.857195	0	0	0.566545	0.10594	HSPG2
Cholestasis	1/67	0.833966	0.860348	0	0	0.557932	0.101299	IL1B
Neutropenia	1/72	0.854824	0.880318	0	0	0.518508	0.0813331	HN1
Hypoglycemia	1/74	0.862415	0.886581	0	0	0.50425	0.0746385	IGFBP2
Myopia	1/75	0.866061	0.888772	0	0	0.49741	0.0715278	FLNA
Acquired immunodeficiency syndrome	1/78	0.876429	0.897843	0	0	0.477957	0.0630422	HLA-B
Blindness	1/81	0.885997	0.905996	0	0	0.459962	0.0556748	PPT1
Mental depression	1/82	0.889018	0.905996	0	0	0.45426	0.0534379	SYT4
Heart conduction disease	1/82	0.889018	0.905996	0	0	0.45426	0.0534379	CDKN1A
Kidney cancer	59/2584	0.901239	0.916859	0	0	0.844327	0.0877967	PTPRS;CLTC;CLSTN1;CHD4;CHD3;CELSR2;CDH2;PPP2R1A;NEFM;KIF1B;KIF1A;B2M;SPTAN1;SRRM2;PABPC4;APLP1;ANK2;EBF3;HSPG2;MMP9;ILF3;SFPQ;HNRNPUL1;MAP1B;CSDE1;IL1RAPL1;SNRNP200;RTN1;LRP1;MAGED1;CRMP1;NRXN2;SEZ6L2;PRPF8;RTN4;ADD2;PTPRZ1;MAP2;FLNA;TNRC18;ATP9A;SPTBN1;DYNC1H1;CADM1;KIDINS220;XRCC5;MYO5A;L1CAM;PRRC2B;QKI;PRRC2A;SMARCA4;FASN;CAPRIN1;TTC3;GNAS;CPE;NES;EIF4G2
Nonsyndromic deafness	1/87	0.90297	0.91703	0	0	0.427739	0.0436577	ACTG1
Celiac disease	1/88	0.905543	0.918054	0	0	0.422801	0.0419507	TMSB4X
Azoospermia	1/96	0.923819	0.934968	0	0	0.387037	0.0306687	RBMX
Alcohol dependence	1/103	0.936889	0.946564	0	0	0.360345	0.0234911	RTN4
Skin cancer	7/454	0.957529	0.965756	0	0	0.571844	0.0248173	SYT4;PTPRS;TUBB3;DNER;CTNNB1;ATP1A3;ANK2
Schizophrenia	1/126	0.966013	0.97264	0	0	0.293693	0.0101554	PRRC2A
Male infertility	1/138	0.975399	0.980409	0	0	0.267801	0.00667071	CNOT7
Melanoma	7/505	0.981046	0.9844	0	0	0.511906	0.00979597	MYH7B;SYT4;PTPRS;LRP1;DNER;CTNNB1;ANK2
Infertility	1/163	0.98746	0.989145	0	0	0.226181	0.00285421	IL1B
Carcinoma	241/11318	0.999993	0.999993	0	0	0.636405	4.70078e-06	IFITM3;RPL5;APP;SPARC;CCNI;HNRNPU;ENO2;FNBP1L;DCAF7;ACTB;SOX2;ALCAM;TRIM28;ZMIZ1;DPYSL5;PPP2R1A;DPYSL2;DPYSL3;KIF21B;B2M;WLS;DDX17;SRRM2;ISLR2;SOX11;ANK2;EBF3;HLA-A;ACTN4;HSPG2;PRKAR1A;RUFY3;MAP1B;TRIB2;GPM6A;TTYH3;TTYH1;MAGED1;STXBP1;SDC2;SDC3;MGST1;MTDH;ZMPSTE24;LDHB;ATP5B;MAP2;MAP6;TNRC18;MAP4;SPTBN1;FDFT1;B4GALNT4;MYH7B;CADM3;CADM1;XRCC5;NR2F1;MYO5A;L1CAM;PBX1;PRRC2B;PRRC2A;SMARCA4;SQLE;HNRNP…

## Sheet: Allen Brain Atlas up
Term	Overlap	P-value	Adjusted P-value	Old P-value	Old Adjusted P-value	Odds Ratio	Combined Score	Genes
Paraventricular hypothalamic nucleus	28/301	8.77055e-09	6.29141e-06	0	0	3.93826	73.062	GPM6A;RPL10;SDC2;USP11;HMP19;DCAF7;SOX2;FADS2;PGRMC1;PCSK1N;PEG10;NNAT;RPS3;RPL35;RPS2;BUB3;RPS12;RPL19;VAT1;CADM1;HSPA5;RPS8;USP22;LAPTM5;L1CAM;GAP43;CANX;FXYD6
Paraventricular hypothalamic nucleus, parvicellular division	28/301	8.77055e-09	6.29141e-06	0	0	3.93826	73.062	GPM6A;RPL10;SDC2;USP11;HMP19;DCAF7;SOX2;FADS2;PGRMC1;PCSK1N;PEG10;NNAT;RPS3;RPL35;RPS2;BUB3;RPS12;RPL19;VAT1;CADM1;HSPA5;RPS8;USP22;LAPTM5;L1CAM;GAP43;CANX;FXYD6
Paraventricular hypothalamic nucleus, parvicellular division, anterior parvicellular part	28/301	8.77055e-09	6.29141e-06	0	0	3.93826	73.062	GPM6A;RPL30;RPL10;SDC2;USP11;SDC3;HMP19;DCAF7;SOX2;FADS2;PGRMC1;PCSK1N;PEG10;NNAT;RPS3;RPL35;RPL13;BUB3;RPS12;VAT1;MARCKSL1;CADM1;HSPA5;USP22;L1CAM;GAP43;ID4;FXYD6
paraventricular nucleus, dorsal part	27/301	3.47984e-08	1.87215e-05	0	0	3.776	64.8478	RPL10;SDC2;USP11;SDC3;DCAF7;SOX2;FADS2;PGRMC1;PCSK1N;CDH2;PEG10;NNAT;RPS3;RPL35;RPL13;NCAM1;RPS2;BUB3;RPS12;RPL19;VAT1;CADM1;HSPA5;L1CAM;GAP43;ID4;FXYD6
Bed nuclei of the stria terminalis, anterior division, magnocellular nucleus	26/301	1.32529e-07	4.07432e-05	0	0	3.61552	57.257	MAGED1;SDC2;USP11;RPS15;PCSK1N;RPS19;PEG10;DNER;NNAT;RPL14;NCAM1;RPS27A;RPS12;VAT1;CADM1;RPS7;APLP1;CIRBP;RPL13A;PBX1;GAP43;FXYD6;MAPT;RPS21;PFDN5;RPS24
lower dorsal lateral hypothalamic area	26/301	1.32529e-07	4.07432e-05	0	0	3.61552	57.257	CD63;CD81;USP11;PCSK1N;DPYSL2;PEG10;NNAT;NCAM1;RPS27A;AP2M1;RPS12;VAT1;RPS8;RPL13A;RPL35A;RPS25;RPS28;PKIA;RPL37A;FXYD6;TMBIM6;EVL;MAPT;PFDN5;RPS24;RPS23
periventricular stratum of PO2	26/301	1.32529e-07	4.07432e-05	0	0	3.61552	57.257	RPL5;MAGED1;SDC2;RGS16;USP11;PGRMC1;PCSK1N;RPS19;PEG10;NNAT;RPL14;RPS2;BUB3;VAT1L;RPS12;RPL19;VAT1;MARCKSL1;CADM1;RPS7;APLP1;PBX1;CANX;HNRNPD;FXYD6;RPS21
dorsal tuberomammillary nucleus, intermediate part (histaminergic)	25/301	4.83902e-07	0.000115706	0	0	3.4568	50.2666	SDC2;PPM1N;ZBTB20;DCAF7;SOX2;PGRMC1;PCSK1N;YWHAQ;DPYSL5;PEG10;NNAT;TIMP1;BUB3;RPS11;VAT1L;RPS12;H2AFY;RPS8;USP22;EBF3;SOX11;EEF1G;RPS25;FXYD6;VIM
intermediate stratum of PHyB-V	25/301	4.83902e-07	0.000115706	0	0	3.4568	50.2666	SDC2;PPM1N;ZBTB20;DCAF7;SOX2;PGRMC1;PCSK1N;YWHAQ;DPYSL5;PEG10;NNAT;TIMP1;BUB3;RPS11;VAT1L;RPS12;H2AFY;RPS8;USP22;EBF3;SOX11;EEF1G;RPS25;FXYD6;VIM
Medial preoptic nucleus	30/410	5.44978e-07	0.000117279	0	0	3.02663	43.6517	MAGED1;SDC2;RGS16;USP11;RPS15;PGRMC1;PCSK1N;RPS19;PEG10;NNAT;DNER;RPL14;BUB3;RPS11;RPL19;RPS12;VAT1;MARCKSL1;CADM1;RPS7;APLP1;PBX1;EEF1A1;SFPQ;VGF;CANX;HNRNPD;GNAS;FXYD6;RPS21
Paraventricular hypothalamic nucleus, parvicellular division, medial parvicellular part, dorsal zone	24/301	1.69176e-06	0.000303389	0	0	3.29981	43.8536	VAT1;CADM1;RPL10;LAPTM5;DCAF7;FADS2;PGRMC1;PCSK1N;GAP43;RPS15A;PEG10;CANX;NNAT;RPS3;RPL35;SNCG;FXYD6;NCAM1;RPS2;BUB3;RPS11;VAT1L;RPS12;RPL19
Posterodorsal preoptic nucleus	24/301	1.69176e-06	0.000303389	0	0	3.29981	43.8536	ANKRD34A;CADM1;MAGED1;SDC2;USP11;APLP1;RPL13A;PBX1;PGRMC1;PCSK1N;GAP43;RPS19;PEG10;PEA15;DNER;NNAT;RPL14;RPL13;FXYD6;BUB3;RPS27A;PFDN5;XPR1;RPS12
Dorsomedial nucleus of the hypothalamus, anterior part	23/301	5.65533e-06	0.000715898	0	0	3.14454	37.9952	VAT1;RPL10;RPL31;RPS8;SDC2;PPM1N;USP22;APLP1;SOX11;DCAF7;SOX2;PGRMC1;PCSK1N;PEG10;NNAT;FXYD6;TIMP1;BUB3;VIM;RPS11;PFDN5;VAT1L;RPS12
Medial preoptic nucleus, medial part	23/301	5.65533e-06	0.000715898	0	0	3.14454	37.9952	MARCKSL1;CADM1;RPS7;MAGED1;SDC2;RGS16;PBX1;SOX2;EEF1A1;CXCL10;PCSK1N;SFPQ;RPS16;DPYSL5;PEG10;CANX;NNAT;GNAS;FXYD6;BUB3;RPS11;RPS12;RPL19
Posterior hypothalamic nucleus	23/301	5.65533e-06	0.000715898	0	0	3.14454	37.9952	RAB3C;H2AFY;CD81;RPS8;SDC2;PPM1N;USP22;EBF3;SOX11;DCAF7;PGRMC1;PCSK1N;DPYSL5;DNER;RPL37A;FXYD6;NCAM1;TIMP1;MAPT;BUB3;PFDN5;RPS24;VAT1L
paraventricular nucleus, cap part	23/301	5.65533e-06	0.000715898	0	0	3.14454	37.9952	RPL30;CADM1;RPL10;HSPA5;CD81;RPS8;LAPTM5;FADS2;MORF4L1;PGRMC1;PCSK1N;GAP43;RPS15A;PEG10;CANX;NNAT;RPL14;FXYD6;RPS2;RPS11;VAT1L;RPS12;RPL19
paraventricular nucleus, rostral part	23/301	5.65533e-06	0.000715898	0	0	3.14454	37.9952	VAT1;SYT4;CADM1;RPL31;SDC2;USP11;LAPTM5;FADS2;PGRMC1;PCSK1N;GAP43;DPYSL5;PEG10;CANX;NNAT;SNCG;FXYD6;RPS2;BUB3;RPS11;VAT1L;RPS12;RPL19
Bed nuclei of the stria terminalis, anterior division, dorsomedial nucleus	22/301	1.80499e-05	0.00143864	0	0	2.99096	32.6684	VAT1;RPL10;MAGED1;SDC2;USP11;CIRBP;FADS2;PGRMC1;GAP43;PEG10;IL1B;PEA15;NNAT;RPL14;RPL13;FXYD6;RPS27A;RPS21;PFDN5;VAMP2;XPR1;RPS12
Bed nuclei of the stria terminalis, posterior division, interfascicular nucleus	22/301	1.80499e-05	0.00143864	0	0	2.99096	32.6684	VAT1;CADM1;MAGED1;SDC2;USP11;NR2F1;RPL13A;RPS15;PGRMC1;PCSK1N;GAP43;PEG10;PEA15;NNAT;FXYD6;NCAM1;MAPT;RPS27A;RPS21;SOX4;XPR1;RPS23
Bed nuclei of the stria terminalis, posterior division, transverse nucleus	22/301	1.80499e-05	0.00143864	0	0	2.99096	32.6684	VAT1;SET;CADM1;USP11;NR2F1;PLAUR;RPL13A;RPL35A;RPS15;PGRMC1;PCSK1N;PEG10;PEA15;TTC3;CTNNB1;FXYD6;NCAM1;RPS21;PFDN5;SOX4;XPR1;VAT1L
Paraventricular hypothalamic nucleus, magnocellular division	22/301	1.80499e-05	0.00143864	0	0	2.99096	32.6684	RPL30;CADM1;RPL10;HSPA5;RPL23;USP11;FADS2;PGRMC1;PCSK1N;RPS19;DPYSL5;PEG10;CANX;NNAT;ID4;RPL14;RPL35;FXYD6;RPS2;RPS11;RPS12;RPL19
Paraventricular hypothalamic nucleus, magnocellular division, medial magnocellular part	22/301	1.80499e-05	0.00143864	0	0	2.99096	32.6684	RPL30;CADM1;RPL10;HSPA5;RPL23;USP11;EEF1A1;FADS2;PGRMC1;PCSK1N;RPS19;PEG10;CANX;RPL37A;NNAT;ID4;RPL14;RPL35;FXYD6;RPS2;RPS12;RPL19
Paraventricular hypothalamic nucleus, magnocellular division, posterior magnocellular part	22/301	1.80499e-05	0.00143864	0	0	2.99096	32.6684	RPL4;CADM1;RPL10;HSPA5;RPL23;LAPTM5;FADS2;MORF4L1;PGRMC1;PCSK1N;RPS19;DPYSL5;PEG10;CANX;NNAT;RPL14;RPL35;FXYD6;RPS2;RPS11;RPS12;RPL19
Paraventricular hypothalamic nucleus, magnocellular division, posterior magnocellular part, lateral zone	22/301	1.80499e-05	0.00143864	0	0	2.99096	32.6684	RPL4;CADM1;RPL10;HSPA5;RPL23;LAPTM5;FADS2;MORF4L1;PGRMC1;PCSK1N;RPS19;DPYSL5;PEG10;CANX;NNAT;RPL14;RPL35;FXYD6;RPS2;RPS11;RPS12;RPL19
medial part of MPO	22/301	1.80499e-05	0.00143864	0	0	2.99096	32.6684	MARCKSL1;CADM1;RPS7;MAGED1;RPL23;SDC2;RGS16;USP11;PBX1;PGRMC1;PCSK1N;RPS19;PEG10;CANX;NNAT;RPL14;GNAS;FXYD6;RPS2;BUB3;RPS12;RPL19
paraventricular nucleus, peduncular or principal part	22/301	1.80499e-05	0.00143864	0	0	2.99096	32.6684	VAT1;CADM1;RPL10;HSPA5;SDC2;USP11;HMP19;DCAF7;SOX2;FADS2;PGRMC1;PCSK1N;GAP43;PEG10;CANX;NNAT;FXYD6;RPS2;BUB3;VAT1L;RPS12;RPL19
periventricular stratum of PPaA	22/301	1.80499e-05	0.00143864	0	0	2.99096	32.6684	VAT1;CADM1;RPL10;HSPA5;SDC2;USP11;HMP19;DCAF7;SOX2;FADS2;PGRMC1;PCSK1N;GAP43;PEG10;CANX;NNAT;FXYD6;RPS2;BUB3;VAT1L;RPS12;RPL19
Dopaminergic A13 group	21/301	5.49166e-05	0.00358123	0	0	2.83905	27.8502	RPL31;RPS8;USP11;RPL13A;L1CAM;FADS2;PGRMC1;PCSK1N;GAP43;DPYSL2;CANX;NNAT;RPL14;RPL13;FXYD6;MAPT;RPS11;RPS27A;PFDN5;XPR1;RPS12
Medial preoptic area	21/301	5.49166e-05	0.00358123	0	0	2.83905	27.8502	VAT1;MARCKSL1;CADM1;RPL10;RPS7;MAGED1;SDC2;USP11;PBX1;EEF1A1;RPS25;PGRMC1;PCSK1N;PEG10;DNER;CANX;NNAT;FXYD6;BUB3;RPS21;RPS12
Paraventricular hypothalamic nucleus, descending division	21/301	5.49166e-05	0.00358123	0	0	2.83905	27.8502	RPL30;USP11;RPL13A;L1CAM;FADS2;PGRMC1;PCSK1N;GAP43;DPYSL2;CANX;NNAT;RPL14;RPL13;FXYD6;MAPT;RPS11;RPS27A;RPS21;PFDN5;XPR1;RPS12
Paraventricular hypothalamic nucleus, descending division, lateral parvicellular part	21/301	5.49166e-05	0.00358123	0	0	2.83905	27.8502	RPL30;USP11;RPL13A;L1CAM;FADS2;PGRMC1;PCSK1N;GAP43;DPYSL2;CANX;NNAT;RPL14;RPL13;FXYD6;MAPT;RPS11;RPS27A;RPS21;PFDN5;XPR1;RPS12
Periventricular region	21/301	5.49166e-05	0.00358123	0	0	2.83905	27.8502	VAT1;CD63;MARCKSL1;CADM1;SDC2;USP11;SOX11;PBX1;RPS25;CXCL10;PGRMC1;PCSK1N;PEG10;NNAT;FXYD6;TIMP1;BUB3;RPS21;VAT1L;RPS12;RPL19
posterior part of anterior hypothalamic nucleus	21/301	5.49166e-05	0.00358123	0	0	2.83905	27.8502	VAT1;HSP90AA1;RPL31;RPS8;SDC2;USP11;EEF1G;PGRMC1;PCSK1N;GAP43;DPYSL5;PEG10;NNAT;SNCG;FXYD6;TIMP1;BUB3;RPS11;PFDN5;VAT1L;RPS12
Anterodorsal preoptic nucleus	20/301	0.000159006	0.00814719	0	0	2.68879	23.5177	IFITM3;VAT1;SYT4;RTN1;CADM1;RPL10;MAGED1;RPL23;USP11;ZBTB20;PGRMC1;GAP43;PEG10;PEA15;DNER;NNAT;RPL13;FXYD6;BUB3;RPS12
dorsomedial preoptic area, intermediate part	20/301	0.000159006	0.00814719	0	0	2.68879	23.5177	VAT1;CADM1;RPS7;MAGED1;SDC2;USP11;CIRBP;PBX1;RPS15;GAP43;NRG4;PEG10;DNER;NNAT;HNRNPD;FXYD6;RPS27A;RPS21;VAT1L;RPS12
lateral part of MPO	20/301	0.000159006	0.00814719	0	0	2.68879	23.5177	VAT1;CADM1;MAGED1;SDC2;USP11;CIRBP;RPL13A;PBX1;RPS15;PGRMC1;PCSK1N;RPS19;PEG10;NNAT;HNRNPD;RPL14;FXYD6;RPS21;RPS12;RPS23
paraventricular nucleus, lateral part	20/301	0.000159006	0.00814719	0	0	2.68879	23.5177	ANKRD34A;RPS7;MAGED1;USP11;RPL35A;RPS15;RPS25;PGRMC1;PCSK1N;DPYSL2;PEG10;NNAT;HNRNPD;RPL14;FXYD6;MAPT;RPS27A;PFDN5;VAT1L;RPS12
peduncular part of dorsomedial hypothalamic nucleus	20/301	0.000159006	0.00814719	0	0	2.68879	23.5177	RPS8;SDC2;PPM1N;USP22;SOX11;DCAF7;SOX2;PGRMC1;PCSK1N;RPS19;CDH2;PEG10;RPL37A;NNAT;FXYD6;TIMP1;BUB3;VIM;PFDN5;RPS12
periventricular stratum of PO1	20/301	0.000159006	0.00814719	0	0	2.68879	23.5177	VAT1;SYT4;MARCKSL1;CADM1;RPL10;RPS7;MAGED1;SDC2;RGS16;USP11;DCAF7;PBX1;PGRMC1;GAP43;PEG10;DNER;NNAT;FXYD6;RPS21;RPS12
posterobasal nucleus, intermediate part	20/301	0.000159006	0.00814719	0	0	2.68879	23.5177	VAT1;RPL10;RPS7;SDC2;USP11;APLP1;RPS15;RPS25;PGRMC1;PCSK1N;PEG10;DNER;NNAT;FXYD6;TMBIM6;TIMP1;BUB3;PFDN5;VAT1L;RPS12
preoptic area	20/301	0.000159006	0.00814719	0	0	2.68879	23.5177	VAT1;MARCKSL1;CADM1;RPS7;MAGED1;SDC2;RGS16;USP11;PBX1;RPS15;PGRMC1;PCSK1N;NRG4;PEG10;DNER;NNAT;FXYD6;RPS21;VAT1L;RPS12
upper dorsal perifornical nucleus	20/301	0.000159006	0.00814719	0	0	2.68879	23.5177	VAT1;GPM6A;SYT4;CADM1;USP11;RPS15;EEF1G;PGRMC1;PCSK1N;DPYSL2;PEG10;NNAT;HNRNPD;FXYD6;TMBIM6;NCAM1;MAPT;RPS21;AP2M1;VAT1L
Nucleus of reunions	19/301	0.000437345	0.0188233	0	0	2.54016	19.6476	RAB3C;RPL10;RGS16;USP22;LAPTM5;L1CAM;DCAF7;SOX2;FADS2;PGRMC1;GAP43;RIMS3;CDH2;DPYSL5;ID4;CTNNB1;EVL;AGRN;AP2M1
dorsal septopreoptic nucleus	19/301	0.000437345	0.0188233	0	0	2.54016	19.6476	VAT1;SYT4;CADM1;RPL10;MAGED1;SDC2;USP11;DCAF7;PBX1;PGRMC1;GAP43;PEG10;DNER;CANX;NNAT;FXYD6;BUB3;RPS21;RPS12
intermediate stratum of PHyB-D	19/301	0.000437345	0.0188233	0	0	2.54016	19.6476	VAT1;RPS7;SDC2;USP11;APLP1;RPL35A;RPS15;RPS25;PGRMC1;PCSK1N;PEG10;DNER;NNAT;HNRNPD;FXYD6;TMBIM6;PFDN5;VAT1L;RPS12
intermediate stratum of PSPa	19/301	0.000437345	0.0188233	0	0	2.54016	19.6476	VAT1;CD81;SDC2;USP11;RPL35A;RPS15;RPS25;PGRMC1;PCSK1N;PEG10;NNAT;FXYD6;TMBIM6;NCAM1;MAPT;RPS27A;PFDN5;VAT1L;RPS12
mantle zone of PO2	19/301	0.000437345	0.0188233	0	0	2.54016	19.6476	VAT1;MARCKSL1;CADM1;RPS7;SDC2;RGS16;USP11;PBX1;RPS15;PCSK1N;RPS19;PEG10;NNAT;FXYD6;BUB3;RPS21;VAT1L;RPS12;RPL19
periventricular stratum of p3ZL	19/301	0.000437345	0.0188233	0	0	2.54016	19.6476	RAB3C;RPL10;RPS8;USP22;LAPTM5;L1CAM;DCAF7;SOX2;EEF1G;FADS2;PGRMC1;GAP43;DPYSL5;CANX;FXYD6;EVL;BUB3;AGRN;PFDN5
second (ventral) preoptic domain	19/301	0.000437345	0.0188233	0	0	2.54016	19.6476	VAT1;MARCKSL1;CADM1;RPS7;SDC2;RGS16;USP11;PBX1;RPS15;PCSK1N;RPS19;PEG10;NNAT;FXYD6;BUB3;RPS21;VAT1L;RPS12;RPL19
upper basal perifornical nucleus	19/301	0.000437345	0.0188233	0	0	2.54016	19.6476	VAT1;CADM1;RPS7;MAGED1;SDC2;APLP1;RPL35A;SOX11;RPS15;PCSK1N;PEG10;DNER;NNAT;HNRNPD;RPL14;RPS27A;PFDN5;VAT1L;RPS12
Bed nuclei of the stria terminalis, posterior division, principal nucleus	18/301	0.00114049	0.0355702	0	0	2.39314	16.2166	CADM1;USP11;SOX2;EEF1A1;PGRMC1;GAP43;PEG10;PEA15;NNAT;ID4;RPS3;FXYD6;RPS2;RPS21;SOX4;VAMP2;DBN1;XPR1
Dorsomedial nucleus of the hypothalamus	18/301	0.00114049	0.0355702	0	0	2.39314	16.2166	VAT1;SDC2;PPM1N;USP22;SOX11;SOX2;PGRMC1;PCSK1N;RPS19;CDH2;PEG10;NNAT;FXYD6;TIMP1;BUB3;VIM;PFDN5;RPS12
Dorsomedial nucleus of the hypothalamus, posterior part	18/301	0.00114049	0.0355702	0	0	2.39314	16.2166	VAT1;SDC2;PPM1N;USP22;SOX11;SOX2;PGRMC1;PCSK1N;RPS19;CDH2;PEG10;NNAT;FXYD6;TIMP1;BUB3;VIM;PFDN5;RPS12
Parastrial nucleus	18/301	0.00114049	0.0355702	0	0	2.39314	16.2166	CADM1;RPS7;MAGED1;USP11;CIRBP;ZBTB20;PBX1;RPS15;GAP43;NRG4;PEG10;NNAT;FXYD6;MAPT;RPS27A;RPS21;VAT1L;RPS12
Subparaventricular zone	18/301	0.00114049	0.0355702	0	0	2.39314	16.2166	CADM1;RPL10;RGS16;USP11;PRRC2B;SOX2;CXCL10;PGRMC1;PCSK1N;TUBA1A;PEG10;NNAT;HNRNPD;GNAS;FXYD6;TMBIM6;BUB3;VAT1L
bed nucleus of the stria terminalis, medioseptal division	18/301	0.00114049	0.0355702	0	0	2.39314	16.2166	TOP2A;SYT4;CADM1;USP11;ZBTB20;SOX2;PGRMC1;SFPQ;ALCAM;PEG10;NNAT;S100A6;DCX;HAS2;RPS2;RPS21;DBN1;XPR1
dorsal part of PHyB	18/301	0.00114049	0.0355702	0	0	2.39314	16.2166	VAT1;RPS7;SDC2;USP11;RPL35A;RPS15;RPS25;PGRMC1;PCSK1N;PEG10;NNAT;FXYD6;TMBIM6;NCAM1;RPS21;PFDN5;VAT1L;RPS12
intermediate stratum of PHyB-I	18/301	0.00114049	0.0355702	0	0	2.39314	16.2166	VAT1;CD81;SDC2;PPM1N;SOX11;PGRMC1;PCSK1N;CDH2;PEG10;DNER;RPL37A;NNAT;FXYD6;TIMP1;BUB3;PFDN5;RPS12;RPS23
mantle zone of PHyB-D	18/301	0.00114049	0.0355702	0	0	2.39314	16.2166	VAT1;RPS7;SDC2;USP11;RPL35A;RPS15;RPS25;PGRMC1;PCSK1N;PEG10;NNAT;FXYD6;TMBIM6;NCAM1;RPS21;PFDN5;VAT1L;RPS12
mantle zone of PSPa	18/301	0.00114049	0.0355702	0	0	2.39314	16.2166	VAT1;SYT4;CD81;SDC2;USP11;RPL35A;RPS15;RPS25;PCSK1N;PEG10;NNAT;FXYD6;TMBIM6;NCAM1;MAPT;RPS21;PFDN5;VAT1L
nucleus of the stria terminalis, medial division, anterior part	18/301	0.00114049	0.0355702	0	0	2.39314	16.2166	TOP2A;SYT4;CADM1;USP11;ZBTB20;SOX2;PGRMC1;SFPQ;ALCAM;PEG10;NNAT;S100A6;DCX;HAS2;RPS2;RPS21;DBN1;XPR1
peduncular subparaventricular area	18/301	0.00114049	0.0355702	0	0	2.39314	16.2166	VAT1;SYT4;CD81;SDC2;USP11;RPL35A;RPS15;RPS25;PCSK1N;PEG10;NNAT;FXYD6;TMBIM6;NCAM1;MAPT;RPS21;PFDN5;VAT1L
periventricular stratum of SeDg	18/301	0.00114049	0.0355702	0	0	2.39314	16.2166	TOP2A;SYT4;CADM1;USP11;ZBTB20;SOX2;PGRMC1;SFPQ;ALCAM;PEG10;NNAT;S100A6;DCX;HAS2;RPS2;RPS21;DBN1;XPR1
preoptic alar plate	18/301	0.00114049	0.0355702	0	0	2.39314	16.2166	VAT1;MARCKSL1;CADM1;RPS7;SDC2;RGS16;USP11;PBX1;RPS15;PCSK1N;NRG4;PEG10;NNAT;FXYD6;UBA1;RPS21;VAT1L;RPS12
preoptic telencephalon	18/301	0.00114049	0.0355702	0	0	2.39314	16.2166	VAT1;MARCKSL1;CADM1;RPS7;SDC2;RGS16;USP11;PBX1;RPS15;PCSK1N;NRG4;PEG10;NNAT;FXYD6;UBA1;RPS21;VAT1L;RPS12
reuniens nucleus, main part	18/301	0.00114049	0.0355702	0	0	2.39314	16.2166	RAB3C;RGS16;STMN2;LAPTM5;L1CAM;SOX2;GAP43;RIMS3;GNG2;CDH2;DPYSL5;DPYSL3;CTNNB1;EVL;MAPT;AGRN;AP2M1;CLASP2
shell of P-DMH	18/301	0.00114049	0.0355702	0	0	2.39314	16.2166	RPS8;SDC2;PPM1N;USP22;SOX11;PGRMC1;PCSK1N;RPS19;CDH2;PEG10;RPL37A;NNAT;FXYD6;TIMP1;BUB3;RPS27A;PFDN5;RPS12
shell of p3ZL	18/301	0.00114049	0.0355702	0	0	2.39314	16.2166	RAB3C;RPL10;RPS8;USP22;LAPTM5;L1CAM;SOX2;EEF1G;FADS2;PGRMC1;GAP43;DPYSL5;CANX;FXYD6;EVL;BUB3;AGRN;PFDN5
upper basal lateral hypothalamic area	18/301	0.00114049	0.0355702	0	0	2.39314	16.2166	VAT1;TSC22D1;CD81;RPL35A;EBF3;RPS25;RPS28;PCSK1N;PEG10;PKIA;RPL37A;FXYD6;TMBIM6;MAPT;PHLDA1;PFDN5;AP2M1;RPS23
Bed nuclei of the stria terminalis, anterior division, anteromedial area	17/301	0.00281403	0.0786467	0	0	2.24771	13.2011	SYT4;CADM1;USP11;ZBTB20;SOX2;PGRMC1;GAP43;PEG10;PEA15;NNAT;S100A6;DCX;RPS2;RPS21;VAMP2;DBN1;XPR1
core of P-DMH	17/301	0.00281403	0.0786467	0	0	2.24771	13.2011	RPL10;SDC2;USP22;ZBTB20;SOX11;DCAF7;SOX2;PGRMC1;PCSK1N;CDH2;PEG10;NNAT;FXYD6;TIMP1;BUB3;VIM;RPS12
first (dorsal) preoptic domain	17/301	0.00281403	0.0786467	0	0	2.24771	13.2011	VAT1;MARCKSL1;CADM1;RPS7;MAGED1;SDC2;USP11;PBX1;RPS15;NRG4;PEG10;DNER;NNAT;FXYD6;RPS21;VAT1L;RPS12
mantle zone of PO1	17/301	0.00281403	0.0786467	0	0	2.24771	13.2011	VAT1;MARCKSL1;CADM1;RPS7;MAGED1;SDC2;USP11;PBX1;RPS15;NRG4;PEG10;DNER;NNAT;FXYD6;RPS21;VAT1L;RPS12
mantle zone of PPaA	17/301	0.00281403	0.0786467	0	0	2.24771	13.2011	VAT1;SYT4;CADM1;USP11;RPL11;RPS15;EEF1G;PGRMC1;PCSK1N;PEG10;NNAT;RPS3;FXYD6;TMBIM6;NCAM1;RPS21;VAT1L
peduncular paraventricular area of PHyA	17/301	0.00281403	0.0786467	0	0	2.24771	13.2011	VAT1;SYT4;CADM1;USP11;RPL11;RPS15;EEF1G;PGRMC1;PCSK1N;PEG10;NNAT;RPS3;FXYD6;TMBIM6;NCAM1;RPS21;VAT1L
striohypothalamic nucleus	17/301	0.00281403	0.0786467	0	0	2.24771	13.2011	VAT1;CADM1;USP11;CIRBP;RPL13A;RPS15;PGRMC1;PCSK1N;PEG10;NNAT;HNRNPD;FXYD6;NCAM1;MAPT;RPS21;PFDN5;RPS23
terminal nucleus of the stria medullaris	17/301	0.00281403	0.0786467	0	0	2.24771	13.2011	VAT1;SYT4;MARCKSL1;CADM1;SDC2;USP11;PGRMC1;PCSK1N;PEG10;CANX;NNAT;FXYD6;NCAM1;BUB3;RPS21;XPR1;RPS23
Bed nuclei of the stria terminalis, anterior division, ventral nucleus	16/301	0.00655515	0.167937	0	0	2.10384	10.5771	VAT1;CADM1;USP11;RPL13A;PBX1;SMARCA4;RPS15;PCSK1N;PEG10;NNAT;FXYD6;NCAM1;MAPT;RPS21;SOX4;AP2M1
Bed nuclei of the stria terminalis, posterior division	16/301	0.00655515	0.167937	0	0	2.10384	10.5771	CADM1;SDC2;USP11;NR2F1;PGRMC1;PCSK1N;GAP43;PEG10;NNAT;RPS3;FXYD6;RPS2;RPS21;SOX4;VAMP2;XPR1
Subparafascicular nucleus, magnocellular part	16/301	0.00655515	0.167937	0	0	2.10384	10.5771	IFITM3;RAB3C;RPS8;SDC2;RGS16;PPM1N;USP22;EBF3;HSPG2;EEF1G;YWHAQ;SCRN1;DPYSL5;IDS;EVL;PFDN5
alar part of peduncular hypothalamus	16/301	0.00655515	0.167937	0	0	2.10384	10.5771	VAT1;CD81;USP11;RPL11;RPS15;EEF1G;PGRMC1;PEG10;NNAT;RPS3;FXYD6;TMBIM6;NCAM1;RPS21;VAT1L;RPS12
core of T-DMH	16/301	0.00655515	0.167937	0	0	2.10384	10.5771	CD63;MARCKSL1;SDC2;ZBTB20;MSN;SOX11;PCSK1N;TRIM28;CDH2;PEG10;GNAS;RPS2;BUB3;VIM;RPS12;RPL19
periventricular stratum of RtC	16/301	0.00655515	0.167937	0	0	2.10384	10.5771	RAB3C;RPL10;HSPA5;USP22;L1CAM;SOX2;FADS2;MORF4L1;PGRMC1;GAP43;CDH2;DPYSL5;ID4;FXYD6;TIMP1;AGRN
retrohypothalamic nucleus	16/301	0.00655515	0.167937	0	0	2.10384	10.5771	RAB3C;RPL10;HSPA5;USP22;L1CAM;SOX2;FADS2;MORF4L1;PGRMC1;GAP43;CDH2;DPYSL5;ID4;FXYD6;TIMP1;AGRN
Medial preoptic nucleus, lateral part	15/301	0.0143831	0.34778	0	0	1.96152	8.32018	ANKRD34A;MARCKSL1;CADM1;MAGED1;SDC2;RGS16;USP11;PBX1;EEF1A1;PCSK1N;VGF;PEG10;CANX;NNAT;BUB3
dorsomedial part of VMH	15/301	0.0143831	0.34778	0	0	1.96152	8.32018	VAT1;RPL5;RPL10;SDC2;RPL35A;SOX11;CXCL10;PCSK1N;TRIM28;CDH2;PEG10;HNRNPD;ID4;VIM;RPS12
locus coeruleus	15/301	0.0143831	0.34778	0	0	1.96152	8.32018	VAT1;APC2;SEPT2;TMEFF1;ACLY;FABP5;RPS18;PEG10;PRDX1;RPL37A;SNCG;PLIN2;MVD;NCAM1;FDFT1
parastrial preoptic nucleus	15/301	0.0143831	0.34778	0	0	1.96152	8.32018	SYT4;RPL10;RPS15;FADS2;PGRMC1;GAP43;PEG10;IL1B;PEA15;NNAT;RPL13;TAGLN2;RPS21;VAT1L;RPS12
rostral interstitial nucleus	15/301	0.0143831	0.34778	0	0	1.96152	8.32018	GPM6A;RPL21;RPS8;SDC2;PPM1N;EBF3;HSPG2;LSS;EEF1G;YWHAQ;SCRN1;DPYSL5;IDS;NCAM1;PFDN5
Dorsal premammillary nucleus	21/482	0.0177957	0.425515	0	0	1.70811	6.88163	ANKRD34A;TSC22D1;CD81;RPL12;PPM1N;SDC2;SOX11;EBF3;PGRMC1;PCSK1N;TRIM28;DPYSL5;IL1RAPL1;RPL37A;DNER;CANX;S100A6;GNAS;RPL37;PFDN5;RPS23
Bed nuclei of the stria terminalis	14/301	0.0296545	0.554925	0	0	1.82073	6.40558	CADM1;USP11;ZBTB20;PGRMC1;GAP43;PEG10;NNAT;RPS3;S100A6;RPS2;RPS21;SOX4;VAMP2;XPR1
Dorsal motor nucleus of the vagus nerve	14/301	0.0296545	0.554925	0	0	1.82073	6.40558	APC2;RPL12;MSN;SNX22;YWHAZ;ACLY;LGALS1;DPYSL3;PPT1;TAGLN2;PLIN2;MVD;FDFT1;PRPH
Pallidum, caudal region	14/301	0.0296545	0.554925	0	0	1.82073	6.40558	CADM1;USP11;ZBTB20;PGRMC1;GAP43;PEG10;NNAT;RPS3;S100A6;RPS2;RPS21;SOX4;VAMP2;XPR1
Retrosplenial area, lateral agranular part, layer 6a	14/301	0.0296545	0.554925	0	0	1.82073	6.40558	CDKN1A;RBFOX2;PTPRS;MYO5A;ATP2A2;HMGCR;YWHAZ;DUSP6;NGRN;HAS2;TNRC18;S100A4;RPS27A;RAB6B
anterior paraventricular nucleus of thalamus	14/301	0.0296545	0.554925	0	0	1.82073	6.40558	CD63;RAB3C;SDC2;RGS16;ITGB2;L1CAM;SOX2;RIMS3;DPYSL5;FASN;ID4;CTNNB1;MVD;MAPT
central part of MPO	14/301	0.0296545	0.554925	0	0	1.82073	6.40558	ANKRD34A;SDC2;RGS16;CIRBP;PBX1;PCSK1N;RPS19;NRG4;PEG10;CANX;NNAT;UBA1;BUB3;RPS12
central part of VMH	14/301	0.0296545	0.554925	0	0	1.82073	6.40558	RPL5;RPS7;SDC2;STMN3;RPL35A;CXCL10;PCSK1N;RPS19;TRIM28;CDH2;PEG10;HNRNPD;ID4;RPS12
diagonal part of septum	14/301	0.0296545	0.554925	0	0	1.82073	6.40558	VAT1;SYT4;CADM1;USP11;ZBTB20;ACLY;CXCL10;ALCAM;PEG10;DNER;FXYD6;EVL;MAPT;AP2M1
intermediate stratum of DgSe	14/301	0.0296545	0.554925	0	0	1.82073	6.40558	DDX17;SYT4;CADM1;USP11;ZBTB20;SOX2;PGRMC1;ALCAM;PEG10;NNAT;DCX;FXYD6;NCAM1;RPS21
intermediate stratum of PO1	14/301	0.0296545	0.554925	0	0	1.82073	6.40558	VAT1;CADM1;RPS7;USP11;PBX1;SMARCA4;RPS15;NRG4;PEG10;NNAT;FXYD6;RPS21;VAT1L;RPS12
intermediate stratum of POH	14/301	0.0296545	0.554925	0	0	1.82073	6.40558	VAT1;MARCKSL1;CADM1;RGS16;USP11;CIRBP;RPS15;PCSK1N;PEG10;NNAT;HNRNPD;FXYD6;RPS21;VAT1L
intermediate stratum of PPaA	14/301	0.0296545	0.554925	0	0	1.82073	6.40558	VAT1;SYT4;CD81;USP11;RPL11;RPS15;EEF1G;PGRMC1;PEG10;NNAT;FXYD6;TMBIM6;RPS21;VAT1L
intermediate stratum of THyB-V	14/301	0.0296545	0.554925	0	0	1.82073	6.40558	CD63;RPL12;ZBTB20;MSN;SOX11;CXCL10;PCSK1N;TRIM28;IL1RAPL1;S100A6;GNAS;RPL37;TIMP1;VIM
intermediate stratum of ZIC	14/301	0.0296545	0.554925	0	0	1.82073	6.40558	H2AFY;CD81;RPS8;SDC2;RPL11;EBF3;EEF1G;RPS25;PEG10;PKIA;RPL24;HAS2;TMBIM6;RPS21
magnocellular (medial) subparafascicular nucleus	14/301	0.0296545	0.554925	0	0	1.82073	6.40558	IFITM3;MARCKSL1;SDC2;RGS16;EBF3;NMNAT2;LSS;EEF1G;SQLE;MORF4L1;YWHAQ;SCRN1;DPYSL5;IL1B
mantle zone of DgSe	14/301	0.0296545	0.554925	0	0	1.82073	6.40558	VAT1;SYT4;CADM1;USP11;ZBTB20;ACLY;CXCL10;ALCAM;PEG10;DNER;FXYD6;EVL;MAPT;AP2M1
mantle zone of ZIC	14/301	0.0296545	0.554925	0	0	1.82073	6.40558	H2AFY;CD81;RPS8;SDC2;RPL11;EBF3;EEF1G;RPS25;PEG10;PKIA;RPL24;HAS2;TMBIM6;RPS21
periventricular stratum of VTTh	14/301	0.0296545	0.554925	0	0	1.82073	6.40558	IFITM3;MARCKSL1;SDC2;RGS16;EBF3;NMNAT2;LSS;EEF1G;SQLE;MORF4L1;YWHAQ;SCRN1;DPYSL5;IL1B
periventricular stratum of isLim	14/301	0.0296545	0.554925	0	0	1.82073	6.40558	VAT1;RPS8;RPL12;EBF3;ACLY;RPS17;RPS28;PEG10;PKIA;RPL37A;SNCG;FXYD6;NCAM1;RPS11
periventricular stratum of r1BL	14/301	0.0296545	0.554925	0	0	1.82073	6.40558	VAT1;APC2;SEPT2;TMEFF1;ACLY;RPS18;PEG10;PRDX1;RPL37A;SNCG;PLIN2;MVD;NCAM1;FDFT1
rostral zona incerta	14/301	0.0296545	0.554925	0	0	1.82073	6.40558	H2AFY;CD81;RPS8;SDC2;RPL11;EBF3;EEF1G;RPS25;PEG10;PKIA;RPL24;HAS2;TMBIM6;RPS21
septohypothalamic nucleus	14/301	0.0296545	0.554925	0	0	1.82073	6.40558	SYT4;SDC3;RPSA;L1CAM;SOX2;PGRMC1;ALCAM;PEG10;PEA15;NNAT;ID4;HAS2;FXYD6;DBN1
tegmental field of p3 (Forel's field)	14/301	0.0296545	0.554925	0	0	1.82073	6.40558	RPS8;SDC2;PPM1N;EBF3;FABP5;YWHAQ;DNER;RPL37A;SNCG;TMBIM6;NCAM1;RPL26;RPS24;VAMP2
ventral tuberomammillary nucleus, intermediate part (histaminergic)	14/301	0.0296545	0.554925	0	0	1.82073	6.40558	CD63;RPL12;ZBTB20;MSN;SOX11;CXCL10;PCSK1N;TRIM28;IL1RAPL1;S100A6;GNAS;RPL37;TIMP1;VIM
zona incerta complex	14/301	0.0296545	0.554925	0	0	1.82073	6.40558	H2AFY;CD81;RPS8;SDC2;RPL11;EBF3;EEF1G;RPS25;PEG10;PKIA;RPL24;HAS2;TMBIM6;RPS21
Bed nucleus of the anterior commissure	18/450	0.0539278	0.906834	0	0	1.55556	4.54239	SYT4;MARCKSL1;RTN1;CADM1;RGS16;USP11;SDC3;EBF3;L1CAM;SOX2;PEG10;PEA15;NNAT;ID4;CTNNB1;TAGLN2;VAMP2;XPR1
Anterior hypothalamic nucleus, posterior part	13/301	0.0573092	0.906834	0	0	1.68145	4.80775	ANKRD34A;CADM1;RPL31;PPM1N;USP11;PGRMC1;PCSK1N;PEG10;PEA15;CANX;NNAT;FXYD6;VAT1L
Anteroventral periventricular nucleus	13/301	0.0573092	0.906834	0	0	1.68145	4.80775	VAT1;RPL5;MARCKSL1;RPS7;RGS16;PBX1;PCSK1N;PEG10;NNAT;BUB3;RPS11;RPS12;RPL19
Dorsomedial nucleus of the hypothalamus, ventral part	13/301	0.0573092	0.906834	0	0	1.68145	4.80775	CD63;RPL21;SDC2;PPM1N;SOX11;PCSK1N;CDH2;PEG10;RPL37A;RPS2;BUB3;RPS27A;RPS12
Nucleus of the solitary tract, commissural part	13/301	0.0573092	0.906834	0	0	1.68145	4.80775	VAT1;APC2;MSN;SNX22;PRDX6;YWHAZ;ACLY;FASN;PPT1;TAGLN2;PLIN2;LCP1;PRPH
PcPV part of the periaqueductal gray	13/301	0.0573092	0.906834	0	0	1.68145	4.80775	IFITM3;MARCKSL1;PPM1N;SOX11;NMNAT2;SEPT3;EEF1G;SQLE;YWHAQ;DPYSL5;DPYSL2;RPL27A;RPL13
Sublaterodorsal nucleus	13/301	0.0573092	0.906834	0	0	1.68145	4.80775	VAT1;APC2;SEPT2;TMEFF1;ACLY;FABP5;PEG10;FASN;SNCG;PLIN2;MVD;FAU;FDFT1
Subparafascicular area	13/301	0.0573092	0.906834	0	0	1.68145	4.80775	IFITM3;SDC2;RGS16;EBF3;NMNAT2;LSS;SOX2;EEF1G;MORF4L1;YWHAQ;SCRN1;DPYSL5;PFDN5
Ventromedial hypothalamic nucleus, central part	13/301	0.0573092	0.906834	0	0	1.68145	4.80775	RPL5;SDC2;STMN3;RPL35A;SOX11;EEF1A1;CXCL10;PCSK1N;TRIM28;CDH2;PEG10;ID4;RPS12
intermediate periretromammillary nucleus	13/301	0.0573092	0.906834	0	0	1.68145	4.80775	CD81;SDC2;PPM1N;EBF3;SOX11;PCSK1N;DPYSL5;DNER;RPL37A;NCAM1;RPL37;PFDN5;AP2M1
intermediate stratum of PHyB-P	13/301	0.0573092	0.906834	0	0	1.68145	4.80775	CD81;SDC2;PPM1N;EBF3;SOX11;PCSK1N;DPYSL5;DNER;RPL37A;NCAM1;RPL37;PFDN5;AP2M1
intermediate stratum of THyB-I	13/301	0.0573092	0.906834	0	0	1.68145	4.80775	CD63;SDC2;RPL12;SOX11;PCSK1N;RPS19;TRIM28;RPL37A;S100A6;GNAS;VIM;RPS12;RPL19
intermediate stratum of p3B	13/301	0.0573092	0.906834	0	0	1.68145	4.80775	RPS8;SDC2;PPM1N;RPL35A;EBF3;LSS;FABP5;IL1B;WBSCR22;HAS2;TMBIM6;RPS21;VAMP2
lateral septal nucleus, intermedio-ventral part	13/301	0.0573092	0.906834	0	0	1.68145	4.80775	DDX17;SYT4;CADM1;USP11;ZBTB20;SOX2;PGRMC1;ALCAM;PEG10;DCX;FXYD6;NCAM1;RPS21
layer 3 of AOV cortex	13/301	0.0573092	0.906834	0	0	1.68145	4.80775	TOP2A;YWHAE;IL1RN;MARCKSL1;NR2F1;CRMP1;SOX11;PTN;DUSP6;DCX;GPC2;SOX4;VAMP2
mantle zone of PHyB-P	13/301	0.0573092	0.906834	0	0	1.68145	4.80775	CD81;SDC2;RPL12;PPM1N;EBF3;SOX11;PCSK1N;DPYSL5;DNER;RPL37A;NCAM1;PFDN5;AP2M1
mantle zone of PHyB-V	13/301	0.0573092	0.906834	0	0	1.68145	4.80775	MARCKSL1;SDC2;ZBTB20;ZC3H8;DCAF7;SOX2;CXCL10;PEG10;FXYD6;NCAM1;TIMP1;VIM;VAT1L
medial amygdala, anterodorsal part	13/301	0.0573092	0.906834	0	0	1.68145	4.80775	RPL21;NR2F1;PRDX6;SOX2;PGRMC1;ALCAM;RPS19;CDH2;DNER;RPL14;TRIB2;AP2M1;XPR1
perimammillary part of PHyB	13/301	0.0573092	0.906834	0	0	1.68145	4.80775	CD81;SDC2;RPL12;PPM1N;EBF3;SOX11;PCSK1N;DPYSL5;DNER;RPL37A;NCAM1;PFDN5;AP2M1
periventricular stratum of PcPV	13/301	0.0573092	0.906834	0	0	1.68145	4.80775	IFITM3;MARCKSL1;PPM1N;SOX11;NMNAT2;SEPT3;EEF1G;SQLE;YWHAQ;DPYSL5;DPYSL2;RPL27A;RPL13
ventral part of PHyB	13/301	0.0573092	0.906834	0	0	1.68145	4.80775	MARCKSL1;SDC2;ZBTB20;ZC3H8;DCAF7;SOX2;CXCL10;PEG10;FXYD6;NCAM1;TIMP1;VIM;VAT1L
Trochlear nucleus	16/405	0.0722984	0.99999	0	0	1.53302	4.02717	VAT1;RPL10;PPM1N;MSN;YWHAZ;ACLY;RPS17;RPS28;TUBA1A;LGALS1;TUBB3;RPL37A;MVD;NCAM1;FDFT1;RPS12
Anterior hypothalamic nucleus, central part	12/301	0.103559	0.99999	0	0	1.54365	3.50042	PGRMC1;PCSK1N;CADM1;MAGED1;PEG10;USP11;CANX;NNAT;FXYD6;BUB3;RPS21;VAT1L
Hypothalamus	12/301	0.103559	0.99999	0	0	1.54365	3.50042	VAT1;PCSK1N;PEG10;SDC2;USP11;NNAT;FXYD6;TMBIM6;RPS21;PBX1;VAT1L;RPS12
Interanteromedial nucleus of the thalamus	12/301	0.103559	0.99999	0	0	1.54365	3.50042	SOX2;RAB3C;RIMS3;DPYSL5;RGS16;ID4;LAPTM5;CTNNB1;EVL;L1CAM;AP2M1;CLASP2
JcPL part of the periaqueductal gray	12/301	0.103559	0.99999	0	0	1.54365	3.50042	IFITM3;CD63;FADS2;SYT4;TUBA1A;YWHAQ;RPL27;FXYD6;DBI;RPL26;PRDX6;YWHAG
Lingula (I)	12/301	0.103559	0.99999	0	0	1.54365	3.50042	CD63;FADS2;TTR;RPLP0;IGFBP2;ITGB2;FLNA;DBI;SNX22;RPS10;CTSD;WLS
Medial amygdalar nucleus, anterodorsal part	12/301	0.103559	0.99999	0	0	1.54365	3.50042	SOX2;MARCKSL1;ALCAM;RPS19;RPL21;CDH2;DNER;NR2F1;GNAS;TRIB2;PRDX6;AP2M1
Medial septal nucleus	12/301	0.103559	0.99999	0	0	1.54365	3.50042	ACLY;SYT4;ALCAM;PTPRS;CADM1;PEG10;USP11;DNER;MAPT;NSG1;AP2M1;XPR1
Median preoptic nucleus	12/301	0.103559	0.99999	0	0	1.54365	3.50042	VAT1;CXCL10;MAGED1;PEG10;SDC2;USP11;PEA15;NNAT;ID4;TIMP1;PRDX6;RPS12
Midline group of the dorsal thalamus	12/301	0.103559	0.99999	0	0	1.54365	3.50042	SOX2;RAB3C;RIMS3;CDH2;DPYSL5;SDC2;FASN;RGS16;ID4;LAPTM5;CTNNB1;L1CAM
Periventricular hypothalamic nucleus, posterior part	12/301	0.103559	0.99999	0	0	1.54365	3.50042	CD63;PCSK1N;TRIM28;SDC2;RPL12;S100A6;GNAS;MSN;SOX11;VIM;RPS12;RPL19
Primary visual area, layer 6b	12/301	0.103559	0.99999	0	0	1.54365	3.50042	CAP1;MYL6;CDKN1A;CNOT7;YWHAB;FASN;PPT1;CTNNB1;ATP2A2;HDGF;HMGCR;PAFAH1B1
Retrosplenial area, lateral agranular part, layer 6b	12/301	0.103559	0.99999	0	0	1.54365	3.50042	CAP1;NGRN;CDKN1A;PTPRS;ZMIZ1;YWHAB;MYO5A;HAS2;ATP2A2;S100A4;HMGCR;KLC1
Ventromedial hypothalamic nucleus, dorsomedial part	12/301	0.103559	0.99999	0	0	1.54365	3.50042	RPL5;CXCL10;PCSK1N;RPL10;CDH2;PEG10;SDC2;ID4;RPL35A;SOX11;VIM;RPS12
dorsolateral isthmic part of the dorsal raphe nucleus	12/301	0.103559	0.99999	0	0	1.54365	3.50042	VAT1;FADS2;ACLY;RPS17;DPYSL5;SDC2;RPS6;RPL37A;ID4;NCAM1;RPS10;FDFT1
dorsomedial nucleus, terminal part	12/301	0.103559	0.99999	0	0	1.54365	3.50042	CD63;PCSK1N;RPS19;TRIM28;PEG10;SDC2;RPL12;RPL37A;GNAS;SOX11;TAGLN2;VIM
granule cell layer of the DG	12/301	0.103559	0.99999	0	0	1.54365	3.50042	RPS17;RPS15A;RPS7;PKIA;RPL22;RPLP0;ISLR2;ZBTB20;FAU;RPS10;XPR1;RPS12
isthmic liminal part of the periaqueductal gray	12/301	0.103559	0.99999	0	0	1.54365	3.50042	VAT1;RPS17;RPS28;RPS8;PEG10;PKIA;RPL12;RPL37A;SNCG;EBF3;FXYD6;RPS11
lower dorsal perifornical nucleus	12/301	0.103559	0.99999	0	0	1.54365	3.50042	RPS15;VAT1;PCSK1N;RPS7;PEG10;USP11;NNAT;HNRNPD;FXYD6;TMBIM6;RPS21;VAT1L
peduncular nucleus of the stria medullaris	12/301	0.103559	0.99999	0	0	1.54365	3.50042	PGRMC1;GAP43;CADM1;HNRNPH1;ID4;TAGLN2;FXYD6;RPS2;RPS21;PHLDA1;XPR1;RPS23
periventricular stratum of ITTh	12/301	0.103559	0.99999	0	0	1.54365	3.50042	IFITM3;RAB3C;MORF4L1;RIMS3;SCRN1;DPYSL5;SDC2;RGS16;CTNNB1;NMNAT2;L1CAM;AGRN
periventricular stratum of JcPL	12/301	0.103559	0.99999	0	0	1.54365	3.50042	IFITM3;CD63;FADS2;SYT4;TUBA1A;YWHAQ;RPL27;FXYD6;DBI;RPL26;PRDX6;YWHAG
periventricular stratum of p1B	12/301	0.103559	0.99999	0	0	1.54365	3.50042	VAT1;ACLY;RPS17;TUBB3;ANXA5;EBF3;TIMP1;FAU;AGRN;LSS;RPS24;VAMP2
posterior paraventricular nucleus	12/301	0.103559	0.99999	0	0	1.54365	3.50042	IFITM3;CD63;MORF4L1;RPL10;SCRN1;DPYSL5;SDC2;FASN;RGS16;CTNNB1;MAPT;L1CAM
r10 part of nucleus gracilis	12/301	0.103559	0.99999	0	0	1.54365	3.50042	APC2;DPYSL3;PPT1;S100A6;MSN;TAGLN2;PLIN2;SNX22;LSS;YWHAZ;FDFT1;PRPH
shell of T-DMH	12/301	0.103559	0.99999	0	0	1.54365	3.50042	CD63;PCSK1N;RPS19;TRIM28;PEG10;SDC2;RPL12;RPL37A;GNAS;SOX11;TAGLN2;VIM
lateral posterior nucleus	21/602	0.119497	0.99999	0	0	1.34676	2.86114	VAT1;SYT4;PTPRS;CADM1;MAGED1;RGS16;USP11;MLLT3;RPS15;PGRMC1;PCSK1N;PEG10;NNAT;CANX;HNRNPD;FXYD6;TMBIM6;RPS27A;RPS10;RPS21;VAT1L
Anteroventral nucleus of thalamus	11/301	0.174568	0.99999	0	0	1.40734	2.45642	CD63;MMP14;TTR;IGFBP2;ITGB2;ID4;DBI;VIM;HSPG2;LSS;CNN3
Barrington's nucleus	11/301	0.174568	0.99999	0	0	1.40734	2.45642	VAT1;APC2;FADS2;ACLY;RPS16;PEG10;RPL35;SNCG;RPL35A;PLIN2;NSG1
Bed nuclei of the stria terminalis, anterior division	11/301	0.174568	0.99999	0	0	1.40734	2.45642	SOX2;PGRMC1;GAP43;CADM1;PEG10;USP11;NNAT;S100A6;DCX;ZBTB20;RPS21
Central medial nucleus of the thalamus	11/301	0.174568	0.99999	0	0	1.40734	2.45642	IFITM3;SOX2;RAB3C;RIMS3;DPYSL5;RGS16;ID4;CTNNB1;EVL;L1CAM;AGRN
Dentate gyrus, granule cell layer	11/301	0.174568	0.99999	0	0	1.40734	2.45642	RPS17;RPS15A;RPS7;PKIA;RPL22;RPLP0;ISLR2;ZBTB20;FAU;RPS10;XPR1
Lateral hypothalamic area	11/301	0.174568	0.99999	0	0	1.40734	2.45642	RPS15;VAT1;PCSK1N;PEG10;NNAT;FXYD6;TMBIM6;NCAM1;RPS21;AP2M1;VAT1L
Midbrain trigeminal nucleus	11/301	0.174568	0.99999	0	0	1.40734	2.45642	APC2;ACLY;RPS18;PEG10;PRDX1;RPL37A;PLXNA1;SNCG;RPS20;MVD;SEPT2
Nucleus of the lateral olfactory tract, layer 3	11/301	0.174568	0.99999	0	0	1.40734	2.45642	ANKRD34A;TUBA1B;MARCKSL1;RPS19;NR2F1;GNAS;STMN3;HDGF;TRIB2;PHLDA1;AP2M1
Paraventricular nucleus of the thalamus	11/301	0.174568	0.99999	0	0	1.40734	2.45642	SOX2;CD63;RAB3C;DPYSL5;SDC2;FASN;RGS16;ID4;CTNNB1;MVD;L1CAM
Periaqueductal gray	11/301	0.174568	0.99999	0	0	1.40734	2.45642	SQLE;RPS17;RPS8;RPL37A;SNCG;EBF3;NCAM1;AGRN;LSS;PFDN5;RPS24
Perireunensis nucleus	11/301	0.174568	0.99999	0	0	1.40734	2.45642	SOX2;RAB3C;ANKRD34A;RIMS3;DPYSL5;RGS16;PPM1N;CTNNB1;L1CAM;AGRN;CLASP2
hilus of the DG	11/301	0.174568	0.99999	0	0	1.40734	2.45642	RPS15A;GNG2;RPS7;RPL31;RPL22;RPLP0;ISLR2;ZBTB20;FAU;RPS10;XPR1
intermediate stratum of TPaA	11/301	0.174568	0.99999	0	0	1.40734	2.45642	RPS15;PCSK1N;CADM1;PEG10;USP11;CANX;NNAT;CIRBP;HNRNPD;FXYD6;RPS21
lateral septal nucleus, intermediate part, periventricular	11/301	0.174568	0.99999	0	0	1.40734	2.45642	CD63;MMP14;TTR;ID4;ZBTB20;DBI;PTN;VIM;B2M;SOX4;CNN3
lateral spiriform nucleus	11/301	0.174568	0.99999	0	0	1.40734	2.45642	IFITM3;SQLE;FADS2;GAP43;YWHAQ;SDC2;FABP7;PPM1N;PRDX6;PFDN5;YWHAG
layer 3 of LOT	11/301	0.174568	0.99999	0	0	1.40734	2.45642	SOX2;ACAP3;ANKRD34A;MARCKSL1;RPL21;SCRN1;GNAS;STMN3;HDGF;MMP9;AP2M1
layer 6 of OCx	11/301	0.174568	0.99999	0	0	1.40734	2.45642	CAP1;MYL6;CDKN1A;PTPRS;CNOT7;YWHAB;MYO5A;ATP2A2;HMGCR;KLC1;DUSP6
liminal nucleus	11/301	0.174568	0.99999	0	0	1.40734	2.45642	RIMS3;YWHAQ;DPYSL5;RGS16;PPM1N;FSCN1;EBF3;EVL;L1CAM;AGRN;LSS
liminal part of the r6 alar plate	11/301	0.174568	0.99999	0	0	1.40734	2.45642	ACLY;LGALS1;FABP5;NRG4;RPL12;MSN;SNCG;SOX11;HLA-A;LSS;EIF4B
m1AD (DM) part of periaqueductal gray	11/301	0.174568	0.99999	0	0	1.40734	2.45642	RPL4;FADS2;GAP43;TUBA1A;RPL27A;PKIA;RPS6;RPL37A;FXYD6;PRDX6;LSS
mantle zone of r6Lim	11/301	0.174568	0.99999	0	0	1.40734	2.45642	ACLY;LGALS1;FABP5;NRG4;RPL12;MSN;SNCG;SOX11;HLA-A;LSS;EIF4B
nucleus of the stria terminalis, medial division, ventral part	11/301	0.174568	0.99999	0	0	1.40734	2.45642	SYT4;PGRMC1;NRG4;PEG10;USP11;RPL11;NNAT;ZBTB20;EBF3;RPS21;XPR1
p1B part of the periaqueductal gray	11/301	0.174568	0.99999	0	0	1.40734	2.45642	VAT1;ACLY;RPS17;TUBB3;EBF3;TIMP1;FAU;AGRN;LSS;RPS24;VAMP2
peduncular (caudal) hypothalamus	11/301	0.174568	0.99999	0	0	1.40734	2.45642	RPS15;VAT1;CD81;PEG10;SDC2;NNAT;FXYD6;TMBIM6;NCAM1;RPS21;VAT1L
periventricular stratum of PalSe	11/301	0.174568	0.99999	0	0	1.40734	2.45642	CD63;MMP14;TTR;ID4;ZBTB20;DBI;PTN;VIM;B2M;SOX4;CNN3
periventricular stratum of isBL	11/301	0.174568	0.99999	0	0	1.40734	2.45642	VAT1;ACLY;RPS17;RPS28;DPYSL5;RPL12;RPS6;RPL37A;ID4;NCAM1;RPS10
periventricular stratum of m1AD	11/301	0.174568	0.99999	0	0	1.40734	2.45642	RPL4;FADS2;GAP43;TUBA1A;RPL27A;PKIA;RPS6;RPL37A;FXYD6;PRDX6;LSS
periventricular stratum of p2Lim	11/301	0.174568	0.99999	0	0	1.40734	2.45642	RIMS3;YWHAQ;DPYSL5;RGS16;PPM1N;FSCN1;EBF3;EVL;L1CAM;AGRN;LSS
periventricular stratum of r10Tr	11/301	0.174568	0.99999	0	0	1.40734	2.45642	APC2;ACLY;LGALS1;PPT1;MSN;TAGLN2;PLIN2;MVD;SNX22;PRDX6;YWHAZ
periventricular stratum of r9Lim	11/301	0.174568	0.99999	0	0	1.40734	2.45642	APC2;ACLY;LGALS1;FASN;MSN;TAGLN2;PLIN2;MVD;SNX22;PRDX6;YWHAZ
r10 part of solitary complex	11/301	0.174568	0.99999	0	0	1.40734	2.45642	APC2;ACLY;LGALS1;PPT1;MSN;TAGLN2;PLIN2;MVD;SNX22;PRDX6;YWHAZ
r9 portion of vagal motor nucleus (postmigratory)	11/301	0.174568	0.99999	0	0	1.40734	2.45642	APC2;ACLY;LGALS1;FASN;MSN;TAGLN2;PLIN2;MVD;SNX22;PRDX6;YWHAZ
sublayer 6b of OCx	11/301	0.174568	0.99999	0	0	1.40734	2.45642	CAP1;MYL6;CDKN1A;CNOT7;PPT1;MYO5A;ATP2A2;HDGF;HMGCR;KLC1;DUSP6
substantia innominata/basal nucleus	11/301	0.174568	0.99999	0	0	1.40734	2.45642	RPS15;SOX2;VAT1;EEF1G;RPS19;RPL10;PEG10;DNER;TTC3;VAMP2;AP2M1
substantia nigra compacta, m1 part	11/301	0.174568	0.99999	0	0	1.40734	2.45642	IFITM3;VAT1;FABP5;SDC2;WBSCR22;PLXNA1;SNCG;L1CAM;LSS;VAMP2;AP2M1
ventral isthmic part of dorsal raphe nucleus	11/301	0.174568	0.99999	0	0	1.40734	2.45642	VAT1;ACLY;RPS17;TUBA1A;DPYSL5;ITGB2;RPL37A;MVD;NCAM1;L1CAM;FDFT1
Suprachiasmatic nucleus	13/370	0.182354	0.99999	0	0	1.35158	2.30013	RGS16;USP11;CXCL10;ILF3;TUBA1A;VGF;PEG10;NNAT;HNRNPD;GNAS;TIMP1;RPS12;RPL19
Anterior hypothalamic nucleus	16/492	0.230735	0.99999	0	0	1.24711	1.82887	IFITM3;CADM1;MAGED1;USP11;PRRC2B;CXCL10;PGRMC1;PCSK1N;PEG10;NNAT;CANX;HNRNPD;FXYD6;BUB3;RPS21;VAT1L
Parafascicular nucleus	13/393	0.241364	0.99999	0	0	1.26825	1.80275	IFITM3;RAB3C;PPM1N;RGS16;L1CAM;LSS;RIMS3;SCRN1;YWHAQ;CTNNB1;EVL;AGRN;IER3
Anterior olfactory nucleus, medial part	10/301	0.273966	0.99999	0	0	1.27247	1.64753	TOP2A;IL1RN;DCX;HAS2;CRMP1;SOX11;PTN;YBX1;SOX4;VAMP2
Anterior olfactory nucleus, posteroventral part	10/301	0.273966	0.99999	0	0	1.27247	1.64753	TMEFF1;ACTR2;DNER;PLAUR;PTN;YBX1;SOX4;VAMP2;AP2M1;RTN4
Anteromedial visual area, layer 4	10/301	0.273966	0.99999	0	0	1.27247	1.64753	ANKRD34A;CDKN1A;WDR82;TNRC18;PTN;HMGCR;FGFBP3;YWHAZ;GAPDH;DUSP6
Anteromedial visual area, layer 5	10/301	0.273966	0.99999	0	0	1.27247	1.64753	ANKRD34A;CDKN1A;TNRC18;MAPT;PTN;HMGCR;YWHAZ;GAPDH;DUSP6;SMARCA4
CoPV part of the periaqueductal gray	10/301	0.273966	0.99999	0	0	1.27247	1.64753	SQLE;FADS2;TUBA1A;RPL27A;PPM1N;RPL13;FXYD6;AGRN;PRDX6;YWHAG
Dentate gyrus, polymorph layer	10/301	0.273966	0.99999	0	0	1.27247	1.64753	RPS15A;GNG2;RPS7;TRIM2;RPL22;RPLP0;ZBTB20;FAU;RPS10;XPR1
Dorsal nucleus raphe	10/301	0.273966	0.99999	0	0	1.27247	1.64753	VAT1;ACLY;RPS17;RPS28;RPL37A;SNCG;NCAM1;L1CAM;RPS10;FDFT1
JcPV part of the periaqueductal gray	10/301	0.273966	0.99999	0	0	1.27247	1.64753	SQLE;SYT4;DPYSL2;RPL27A;PPM1N;ATP5A1;FXYD6;AGRN;PRDX6;VAMP2
Lateral septal nucleus, ventral part	10/301	0.273966	0.99999	0	0	1.27247	1.64753	SOX2;SYT4;PGRMC1;CADM1;PEG10;NNAT;ID4;RPS2;DBN1;XPR1
Lingula (I), granular layer	10/301	0.273966	0.99999	0	0	1.27247	1.64753	CD63;FADS2;RPLP0;IGFBP2;ITGB2;SNX22;VIM;RPS10;CTSD;WLS
Lingula (I), molecular layer	10/301	0.273966	0.99999	0	0	1.27247	1.64753	CD63;FADS2;IGFBP2;ITGB2;FLNA;DBI;RPS10;CTSD;TPT1;WLS
Locus ceruleus	10/301	0.273966	0.99999	0	0	1.27247	1.64753	VAT1;APC2;ACLY;PEG10;PRDX1;SNCG;PLIN2;MVD;SEPT2;FDFT1
Major island of Calleja	10/301	0.273966	0.99999	0	0	1.27247	1.64753	TOP2A;SYT4;ALCAM;TSC22D1;HNRNPH1;PEG10;DCX;ZBTB20;GAPDH;XPR1
Nucleus of the lateral olfactory tract, pyramidal layer	10/301	0.273966	0.99999	0	0	1.27247	1.64753	ACAP3;ANKRD34A;ACTR2;MARCKSL1;RPL21;SCRN1;PSAP;STMN3;HDGF;AP2M1
Nucleus of the posterior commissure	10/301	0.273966	0.99999	0	0	1.27247	1.64753	RAB3C;RIMS3;YWHAQ;RGS16;PPM1N;S100A4;L1CAM;AGRN;PFDN5;IER3
Orbital area, lateral part, layer 6a	10/301	0.273966	0.99999	0	0	1.27247	1.64753	TMEFF1;ACAP3;NGRN;IL1RN;LRP1;RPS18;MYO5A;PRPF8;SREBF2;MTDH
Parabrachial nucleus, medial division	10/301	0.273966	0.99999	0	0	1.27247	1.64753	ACLY;RPS18;PEG10;PRDX1;PLXNA1;MSN;SNCG;RPS20;NCAM1;SEPT2
Parabrachial nucleus, medial division, medial medial part	10/301	0.273966	0.99999	0	0	1.27247	1.64753	ACLY;RPS18;PEG10;PRDX1;PLXNA1;MSN;SNCG;RPS20;NCAM1;SEPT2
Primary somatosensory area, trunk, layer 6a	10/301	0.273966	0.99999	0	0	1.27247	1.64753	LASP1;PTPRS;CNOT7;LRP1;PPT1;MYO5A;HAS2;PTN;HMGCR;MLLT3
anterior nuclei	10/301	0.273966	0.99999	0	0	1.27247	1.64753	CD63;TTR;FABP5;RGS16;ITGB2;ID4;DBI;L1CAM;LSS;CNN3
anteroventral nucleus	10/301	0.273966	0.99999	0	0	1.27247	1.64753	CD63;TTR;RGS16;IGFBP2;ITGB2;ID4;DBI;HSPG2;LSS;CNN3
anteroventral periventricular preoptic nucleus	10/301	0.273966	0.99999	0	0	1.27247	1.64753	VAT1;ILF3;RPS7;PEG10;RGS16;USP11;RPL35;PRDX6;PBX1;RPS12
dorsal part of PcP	10/301	0.273966	0.99999	0	0	1.27247	1.64753	RPS15A;RPL18A;RPS18;HNRNPH1;TRIM2;RPS6;ZBTB20;FAU;RPS10;XPR1
dorsal part of m2A	10/301	0.273966	0.99999	0	0	1.27247	1.64753	FADS2;TUBA1A;RPL10;PKIA;NNAT;FXYD6;VIM;PRDX6;WLS;CNN3
dorsal preisthmic part of periaqueductal gray	10/301	0.273966	0.99999	0	0	1.27247	1.64753	FADS2;TUBA1A;RPL10;PKIA;NNAT;FXYD6;VIM;PRDX6;WLS;CNN3
interanterodorsal nucleus	10/301	0.273966	0.99999	0	0	1.27247	1.64753	RAB3C;RIMS3;DPYSL5;SDC2;RGS16;ID4;CTNNB1;L1CAM;AP2M1;CLASP2
intermediate part of PHyB	10/301	0.273966	0.99999	0	0	1.27247	1.64753	VAT1;PCSK1N;MARCKSL1;CD81;PEG10;SDC2;SOX11;FXYD6;TMBIM6;TIMP1
intermediate part of the arcuate nucleus	10/301	0.273966	0.99999	0	0	1.27247	1.64753	CD63;PCSK1N;TRIM28;SDC2;RPL37A;S100A6;SOX11;RPS10;RPS12;RPL19
intermediate stratum of Hb	10/301	0.273966	0.99999	0	0	1.27247	1.64753	CD63;SCRN1;DPYSL5;SDC2;FABP7;RGS16;PPM1N;ID4;CTNNB1;L1CAM
intermediate stratum of SeDg	10/301	0.273966	0.99999	0	0	1.27247	1.64753	RPS15;VAT1;CADM1;PEG10;USP11;NNAT;ZBTB20;NCAM1;RPS21;VAT1L
intermediate stratum of THyB-P	10/301	0.273966	0.99999	0	0	1.27247	1.64753	PCSK1N;TRIM28;DPYSL5;RPL12;CANX;IL1RAPL1;S100A6;GNAS;SOX11;RPL37
intermediate stratum of r6Lim	10/301	0.273966	0.99999	0	0	1.27247	1.64753	ACLY;LGALS1;FABP5;RPL12;MSN;SNCG;SOX11;TAGLN2;LCP1;LSS
isthmic basal plate	10/301	0.273966	0.99999	0	0	1.27247	1.64753	VAT1;ACLY;PEG10;SDC2;RPL12;SNCG;EBF3;MVD;NCAM1;FDFT1
lateral part of r1B	10/301	0.273966	0.99999	0	0	1.27247	1.64753	VAT1;ACLY;FABP5;RPS18;PEG10;PRDX1;PLXNA1;SNCG;PLIN2;MVD
lateral preoptic area, PO1 part	10/301	0.273966	0.99999	0	0	1.27247	1.64753	RPS15;VAT1;NRG4;PEG10;STMN3;UBA1;RPS21;PBX1;AP2M1;SMARCA4
layer 4 of OCx	10/301	0.273966	0.99999	0	0	1.27247	1.64753	CDKN1A;LASP1;CCL20;TNRC18;MAPT;PTN;HMGCR;GAPDH;DUSP6;TPT1
layer 5 of OCx	10/301	0.273966	0.99999	0	0	1.27247	1.64753	CDKN1A;LASP1;YWHAB;MYO5A;TNRC18;PTN;HMGCR;RAB6B;DUSP6;TPT1
layer 6 of RSC	10/301	0.273966	0.99999	0	0	1.27247	1.64753	CAP1;CNOT7;GNG2;FASN;NR2F1;CTNNB1;ATP2A2;MVD;PAFAH1B1;PRPH
liminal periaqueductal gray of m2	10/301	0.273966	0.99999	0	0	1.27247	1.64753	RPL30;RPS15A;PEG10;RPL12;HMGA1;SNCG;EBF3;RPS11;AGRN;AP2M1
lower basal perifornical nucleus	10/301	0.273966	0.99999	0	0	1.27247	1.64753	VAT1;PCSK1N;TSC22D1;CD81;PEG10;DNER;RPL37A;SOX11;PFDN5;RPS23
mantle zone of PHyB-I	10/301	0.273966	0.99999	0	0	1.27247	1.64753	VAT1;PCSK1N;MARCKSL1;CD81;PEG10;SDC2;SOX11;FXYD6;TMBIM6;TIMP1
mantle zone of POH	10/301	0.273966	0.99999	0	0	1.27247	1.64753	VAT1;PCSK1N;MARCKSL1;CADM1;PEG10;RGS16;USP11;NNAT;FXYD6;RPS21
mantle zone of PcPD	10/301	0.273966	0.99999	0	0	1.27247	1.64753	RPS15A;RPL18A;RPS18;HNRNPH1;TRIM2;RPS6;ZBTB20;FAU;RPS10;XPR1
mantle zone of isBL	10/301	0.273966	0.99999	0	0	1.27247	1.64753	VAT1;ACLY;RPS18;PEG10;RPL12;RPS6;SNCG;EBF3;RPS20;NCAM1
mantle zone of m2AD	10/301	0.273966	0.99999	0	0	1.27247	1.64753	FADS2;TUBA1A;RPL10;PKIA;NNAT;FXYD6;VIM;PRDX6;WLS;CNN3
mantle zone of r1BL	10/301	0.273966	0.99999	0	0	1.27247	1.64753	VAT1;ACLY;FABP5;RPS18;PEG10;PRDX1;PLXNA1;SNCG;PLIN2;MVD
mantle zone of the PBC	10/301	0.273966	0.99999	0	0	1.27247	1.64753	SQLE;RPS18;RPS8;PEG10;NNAT;MSN;SNCG;EBF3;RPS20;NCAM1
parabrachial complex	10/301	0.273966	0.99999	0	0	1.27247	1.64753	SQLE;RPS18;RPS8;PEG10;NNAT;MSN;SNCG;EBF3;RPS20;NCAM1
parvicellular interstitial nucleus of the posterior commissure	10/301	0.273966	0.99999	0	0	1.27247	1.64753	IFITM3;FADS2;TUBA1A;PPM1N;RPL27;FAU;AGRN;PRDX6;PFDN5;YWHAG
periventricular mantle of isBM	10/301	0.273966	0.99999	0	0	1.27247	1.64753	VAT1;ACLY;RPS17;TUBA1A;ITGB2;RPL37A;MVD;NCAM1;L1CAM;FDFT1
periventricular stratum of CoPV	10/301	0.273966	0.99999	0	0	1.27247	1.64753	SQLE;FADS2;TUBA1A;RPL27A;PPM1N;RPL13;FXYD6;AGRN;PRDX6;YWHAG
periventricular stratum of DTTh	10/301	0.273966	0.99999	0	0	1.27247	1.64753	SOX2;RAB3C;RIMS3;DPYSL5;RGS16;ID4;LAPTM5;CTNNB1;MAPT;L1CAM
periventricular stratum of JcPV	10/301	0.273966	0.99999	0	0	1.27247	1.64753	SQLE;SYT4;DPYSL2;RPL27A;PPM1N;ATP5A1;FXYD6;AGRN;PRDX6;VAMP2
periventricular stratum of TPaA	10/301	0.273966	0.99999	0	0	1.27247	1.64753	SOX2;CXCL10;PCSK1N;PEG10;RGS16;NNAT;FXYD6;BUB3;VAT1L;RPL19
periventricular stratum of m2AD	10/301	0.273966	0.99999	0	0	1.27247	1.64753	FADS2;TUBA1A;RPL10;PKIA;NNAT;FXYD6;VIM;PRDX6;WLS;CNN3
periventricular stratum of m2Lim	10/301	0.273966	0.99999	0	0	1.27247	1.64753	RPL30;RPS15A;PEG10;RPL12;HMGA1;SNCG;EBF3;RPS11;AGRN;AP2M1
periventricular stratum of r9Tr	10/301	0.273966	0.99999	0	0	1.27247	1.64753	VAT1;APC2;ACLY;LGALS1;TAGLN2;PLIN2;MVD;SNX22;PRDX6;YWHAZ
preopto-hypothalamic band	10/301	0.273966	0.99999	0	0	1.27247	1.64753	VAT1;PCSK1N;MARCKSL1;CADM1;PEG10;RGS16;USP11;NNAT;FXYD6;RPS21
r1 roof plate	10/301	0.273966	0.99999	0	0	1.27247	1.64753	CD63;TTR;IGFBP2;ITGB2;FLNA;DBI;HSPG2;CTSD;TPT1;WLS
r6 part of ventral parvicellular reticular formation	10/301	0.273966	0.99999	0	0	1.27247	1.64753	ACLY;LGALS1;FABP5;RPL12;MSN;SNCG;SOX11;TAGLN2;LCP1;LSS
r9 (gustatory) part of solitary complex	10/301	0.273966	0.99999	0	0	1.27247	1.64753	VAT1;APC2;ACLY;LGALS1;TAGLN2;PLIN2;MVD;SNX22;PRDX6;YWHAZ
retroreuniens nucleus	10/301	0.273966	0.99999	0	0	1.27247	1.64753	IFITM3;SOX2;RAB3C;YWHAQ;DPYSL5;SDC2;RGS16;EBF3;L1CAM;AGRN
rostral paraventricular nucleus	10/301	0.273966	0.99999	0	0	1.27247	1.64753	SOX2;CXCL10;PCSK1N;PEG10;RGS16;NNAT;FXYD6;BUB3;VAT1L;RPL19
substantia innominata/basal nucleus, transitional part	10/301	0.273966	0.99999	0	0	1.27247	1.64753	RPS15;VAT1;CADM1;PEG10;USP11;NNAT;ZBTB20;NCAM1;RPS21;VAT1L
superficial dorsofrontal area	10/301	0.273966	0.99999	0	0	1.27247	1.64753	MORF4L1;RPS15A;RPL18A;TRIM2;PLAUR;ZBTB20;FAU;RPS10;OAZ1;XPR1
superficial part of arcuate nucleus	10/301	0.273966	0.99999	0	0	1.27247	1.64753	CD63;PCSK1N;SDC2;RPL12;CANX;RPL37A;S100A6;GNAS;SOX11;RPL37
superficial stratum of DgSe	10/301	0.273966	0.99999	0	0	1.27247	1.64753	VAT1;ACLY;SYT4;CXCL10;ALCAM;PEG10;USP11;DNER;MAPT;AP2M1
superficial stratum of PCPD	10/301	0.273966	0.99999	0	0	1.27247	1.64753	MORF4L1;RPS15A;RPL18A;TRIM2;PLAUR;ZBTB20;FAU;RPS10;OAZ1;XPR1
superficial stratum of r6Lim	10/301	0.273966	0.99999	0	0	1.27247	1.64753	ACLY;LGALS1;FABP5;NRG4;RPL12;MSN;SOX11;HLA-A;LSS;EIF4B
triangular septal nucleus	10/301	0.273966	0.99999	0	0	1.27247	1.64753	SOX2;FADS2;BTG1;TTR;IGFBP2;ITGB2;ID4;EBF3;VIM;SMARCA4
Anterodorsal nucleus	11/354	0.333842	0.99999	0	0	1.18659	1.30179	CD63;MMP14;TTR;FABP5;IGFBP2;ITGB2;ID4;DBI;VIM;WLS;CNN3
Dentate gyrus	10/320	0.338696	0.99999	0	0	1.1933	1.29193	RPS17;RPS15A;RPS7;PKIA;RPL22;ISLR2;ZBTB20;FAU;RPS10;XPR1
Septofimbrial nucleus	13/431	0.351571	0.99999	0	0	1.15066	1.20283	CD63;BTG1;IGFBP2;ITGB2;EBF3;PTN;SOX2;FADS2;TTR;ID4;VIM;DBN1;XPR1
Facial motor nucleus	10/330	0.373835	0.99999	0	0	1.15541	1.13685	ACLY;LGALS1;FABP5;NRG4;RPL12;MSN;SOX11;HLA-A;LSS;EIF4B
Ventromedial hypothalamic nucleus	12/405	0.383098	0.99999	0	0	1.129	1.08324	VAT1;RPL5;CXCL10;CD63;PCSK1N;RPS7;TRIM28;PEG10;SDC2;ID4;SOX11;RPS12
Anterior tegmental nucleus	16/552	0.38698	0.99999	0	0	1.10401	1.04813	ANKRD34A;RPL12;PPM1N;SDC2;YWHAZ;ZMPSTE24;ACLY;RPS28;TUBA1A;GNG2;SCRN1;YWHAQ;DPYSL5;FTH1;MVD;NCAM1
Agranular insular area	9/301	0.399772	0.99999	0	0	1.13905	1.04435	ANKRD34A;ACTR2;CNOT7;GNG2;YWHAB;ACTN4;HMGCR;TRIB2;PRPH
Agranular insular area, dorsal part, layer 6a	9/301	0.399772	0.99999	0	0	1.13905	1.04435	ACTR2;GNG2;YWHAB;FASN;ISLR2;RPS20;SREBF2;XPR1;IER3
Anterior cingulate area, dorsal part, layer 6b	9/301	0.399772	0.99999	0	0	1.13905	1.04435	YWHAE;SCRN1;PPP2R1A;MYO5A;CPE;ATP2A2;LSS;SREBF2;SEPT3
Anterior hypothalamic nucleus, anterior part	9/301	0.399772	0.99999	0	0	1.13905	1.04435	PCSK1N;PEG10;USP11;CANX;HNRNPD;GNAS;STMN3;RPS21;PRRC2B
Anteromedial visual area, layer 6a	9/301	0.399772	0.99999	0	0	1.13905	1.04435	NGRN;CDKN1A;PTPRS;MYO5A;ATP2A2;TNRC18;SYP;HMGCR;KLC1
Arcuate hypothalamic nucleus	9/301	0.399772	0.99999	0	0	1.13905	1.04435	CD63;RPL18A;TRIM28;RPS7;SDC2;S100A6;VIM;RPS10;RPS12
Central amygdalar nucleus	9/301	0.399772	0.99999	0	0	1.13905	1.04435	TTR;RPS19;RPL21;USP22;NR2F1;NSG1;XPR1;WLS;PRPH
Dentate gyrus, molecular layer	9/301	0.399772	0.99999	0	0	1.13905	1.04435	RPS17;RPS15A;YWHAB;PKIA;RPL22;ISLR2;ZBTB20;RPS10;XPR1
Dorsal peduncular area, layer 6a	9/301	0.399772	0.99999	0	0	1.13905	1.04435	TOP2A;CDH2;PPP2R1A;RPLP0;S100A6;DCX;FLNA;SOX11;SOX4
Fastigial nucleus	9/301	0.399772	0.99999	0	0	1.13905	1.04435	CD63;BTG1;PPM1N;ITGB2;SOX11;S100A4;HSPG2;PBX1;NEUROG2
Gustatory areas, layer 6a	9/301	0.399772	0.99999	0	0	1.13905	1.04435	TMEFF1;ACTR2;LASP1;GNG2;PPT1;PLAUR;ACTN4;IER3;PRPH
Hypoglossal nucleus	9/301	0.399772	0.99999	0	0	1.13905	1.04435	ACLY;LGALS1;RPL12;ANXA5;MSN;TAGLN2;SNX22;FDFT1;PRPH
Interanterodorsal nucleus of the thalamus	9/301	0.399772	0.99999	0	0	1.13905	1.04435	SOX2;RAB3C;RIMS3;SDC2;RGS16;ID4;CTNNB1;L1CAM;AP2M1
Intermediodorsal nucleus of the thalamus	9/301	0.399772	0.99999	0	0	1.13905	1.04435	IFITM3;RAB3C;RIMS3;DPYSL5;RGS16;CTNNB1;EVL;NMNAT2;L1CAM
Medial amygdalar nucleus, posterodorsal part, sublayer c	9/301	0.399772	0.99999	0	0	1.13905	1.04435	FADS2;TTR;DNER;NR2F1;DBI;DCAF7;XPR1;PRRC2A;PRPH
Medial pretectal area	9/301	0.399772	0.99999	0	0	1.13905	1.04435	IFITM3;CD63;FADS2;SDC2;FABP7;DBI;VIM;PRDX6;PRRC2A
Parabrachial nucleus, lateral division, external lateral part	9/301	0.399772	0.99999	0	0	1.13905	1.04435	VAT1;SQLE;SYT4;SPARC;RPS18;PRDX1;RPS20;NCAM1;L1CAM
Parataenial nucleus	9/301	0.399772	0.99999	0	0	1.13905	1.04435	SOX2;RAB3C;SDC2;RGS16;ID4;CTNNB1;DBI;L1CAM;AP2M1
PcPL part of the periaqueductal gray	9/301	0.399772	0.99999	0	0	1.13905	1.04435	IFITM3;SQLE;CD63;FADS2;YWHAQ;SDC2;FXYD6;PRDX6;YWHAG
Periventricular zone	9/301	0.399772	0.99999	0	0	1.13905	1.04435	VAT1;CD63;PCSK1N;RPL18A;RPS7;PEG10;SDC2;RPS12;RPL19
Posterior amygdalar nucleus	9/301	0.399772	0.99999	0	0	1.13905	1.04435	MARCKSL1;PRKAR1A;PEA15;DNER;APLP1;PSAP;NR2F1;HDGF;AP2M1
Posterior parietal association areas, layer 6a	9/301	0.399772	0.99999	0	0	1.13905	1.04435	CAP1;CDKN1A;PTPRS;MYO5A;ATP2A2;TNRC18;HMGCR;PHLDA1;DUSP6
Precommissural nucleus	9/301	0.399772	0.99999	0	0	1.13905	1.04435	IFITM3;SQLE;CD63;FADS2;YWHAQ;DPYSL5;SDC2;FABP7;PPM1N
Primary motor area, Layer 6b	9/301	0.399772	0.99999	0	0	1.13905	1.04435	TMEFF1;PTPRS;SCRN1;LRP1;MYO5A;ATP2A2;MLLT3;SREBF2;SEPT3
Primary somatosensory area, upper limb, layer 6a	9/301	0.399772	0.99999	0	0	1.13905	1.04435	TMEFF1;ACAP3;LASP1;LRP1;KIF5C;PPT1;MYO5A;PTN;MLLT3
Retrosplenial area, dorsal part, layer 6b	9/301	0.399772	0.99999	0	0	1.13905	1.04435	HSPA8;CDKN1A;TUBA1B;CNOT7;ZMIZ1;ATP2A2;MAPT;HMGCR;KLC1
Secondary motor area, layer 6b	9/301	0.399772	0.99999	0	0	1.13905	1.04435	TMEFF1;ACTR2;SCRN1;LRP1;PPP2R1A;MYO5A;ATP2A2;SREBF2;SEPT3
Subiculum, dorsal part, molecular layer	9/301	0.399772	0.99999	0	0	1.13905	1.04435	RPS25;TMEFF1;BTG1;RPS15A;RPL22;ZBTB20;SNRNP200;RPS10;TRIB2
Substantia nigra, compact part	9/301	0.399772	0.99999	0	0	1.13905	1.04435	VAT1;SLC38A1;FABP5;YWHAQ;SDC2;WBSCR22;SNCG;LSS;VAMP2
Triangular nucleus of septum	9/301	0.399772	0.99999	0	0	1.13905	1.04435	SOX2;FADS2;BTG1;TTR;ITGB2;ID4;EBF3;VIM;XPR1
Ventral premammillary nucleus	9/301	0.399772	0.99999	0	0	1.13905	1.04435	PCSK1N;TRIM28;SDC2;RPL12;CANX;RPL37A;GNAS;SOX11;TAGLN2
Ventromedial hypothalamic nucleus, anterior part	9/301	0.399772	0.99999	0	0	1.13905	1.04435	CXCL10;PCSK1N;TUBA1A;RPL10;USP11;HNRNPD;ID4;PLAUR;PRRC2B
Zona incerta	9/301	0.399772	0.99999	0	0	1.13905	1.04435	RAB31;YWHAQ;RPS8;HAS2;RPL35A;RPL27;TMBIM6;MVD;RPS21
accumbens nucleus, core domain	9/301	0.399772	0.99999	0	0	1.13905	1.04435	TOP2A;ALCAM;ID4;DCX;GPC2;ZBTB20;SOX11;PHLDA1;SOX4
bed nucleus of the stria terminalis, laterocentral division	9/301	0.399772	0.99999	0	0	1.13905	1.04435	SOX2;TOP2A;TTR;TTYH1;PEG10;ID4;S100A6;DCX;ZBTB20
centromedian nucleus	9/301	0.399772	0.99999	0	0	1.13905	1.04435	SOX2;RAB3C;RIMS3;DPYSL5;RGS16;LAPTM5;CTNNB1;EVL;L1CAM
cerebellar nuclei of CbV	9/301	0.399772	0.99999	0	0	1.13905	1.04435	CD63;BTG1;PPM1N;ITGB2;SOX11;S100A4;HSPG2;PBX1;NEUROG2
dorsal part of alar p3	9/301	0.399772	0.99999	0	0	1.13905	1.04435	SOX2;CD63;TTR;SDC2;RGS16;ID4;DBI;L1CAM;XPR1
dorsal peduncular cortex, periventricular part	9/301	0.399772	0.99999	0	0	1.13905	1.04435	TOP2A;CDH2;DCX;FLNA;SOX11;DBI;HN1;RPS2;SOX4
intermediate stratum of PThE	9/301	0.399772	0.99999	0	0	1.13905	1.04435	SOX2;CD63;TTR;SDC2;RGS16;ID4;DBI;L1CAM;XPR1
intermediate stratum of cerebellar vermis	9/301	0.399772	0.99999	0	0	1.13905	1.04435	CD63;BTG1;TTR;PPM1N;ITGB2;SOX11;S100A4;PBX1;NEUROG2
intermediate stratum of isBL	9/301	0.399772	0.99999	0	0	1.13905	1.04435	SYT4;RPS18;PEG10;RPL12;PLXNA1;SNCG;EBF3;RPS20;NCAM1
intermediate stratum of p2B	9/301	0.399772	0.99999	0	0	1.13905	1.04435	RPS8;SDC2;RGS16;PPM1N;WBSCR22;HAS2;EBF3;TMBIM6;LSS
isthmic part of basolateral isthmic reticular formation	9/301	0.399772	0.99999	0	0	1.13905	1.04435	SYT4;RPS18;PEG10;RPL12;PLXNA1;SNCG;EBF3;RPS20;NCAM1
lambdoid septal zone	9/301	0.399772	0.99999	0	0	1.13905	1.04435	SYT4;ALCAM;PEG10;USP11;DNER;DCX;ZBTB20;AP2M1;XPR1
lateral part of the isB	9/301	0.399772	0.99999	0	0	1.13905	1.04435	VAT1;ACLY;SDC2;RPL12;SNCG;EBF3;MVD;NCAM1;FDFT1
lateral septal nucleus, dorsal part	9/301	0.399772	0.99999	0	0	1.13905	1.04435	SOX2;ALCAM;ENC1;ID4;EBF3;DBI;PTN;B2M;XPR1
layer 2 of VPrP cortex	9/301	0.399772	0.99999	0	0	1.13905	1.04435	ACTR2;EEF1A2;HAS2;SERINC1;PTN;CKB;HMGCR;SOX4;AP2M1
layer 3 of InsCx	9/301	0.399772	0.99999	0	0	1.13905	1.04435	ANKRD34A;ACTR2;IL1RN;GNG2;LAPTM5;PLAUR;HDGF;PTN;TRIB2
layer 6 of CCx	9/301	0.399772	0.99999	0	0	1.13905	1.04435	SQLE;TMEFF1;MYO5A;ATP2A2;HMGCR;DUSP6;SREBF2;VAMP2;SEPT3
lower basal lateral hypothalamic area	9/301	0.399772	0.99999	0	0	1.13905	1.04435	VAT1;RPS28;MARCKSL1;TSC22D1;CD81;RPL35A;EBF3;PHLDA1;PFDN5
mantle zone of PThE	9/301	0.399772	0.99999	0	0	1.13905	1.04435	SOX2;CD63;TTR;SDC2;RGS16;ID4;DBI;L1CAM;XPR1
mantle zone of PalSe	9/301	0.399772	0.99999	0	0	1.13905	1.04435	SOX2;SYT4;ALCAM;TTR;PEG10;ID4;ZBTB20;SOX4;XPR1
mantle zone of THyB-V	9/301	0.399772	0.99999	0	0	1.13905	1.04435	IFITM3;TRIM28;RPL12;S100A6;GNAS;SOX11;RPL37;TIMP1;VIM
mantle zone of isBM	9/301	0.399772	0.99999	0	0	1.13905	1.04435	VAT1;ACLY;RPS17;DPYSL5;SDC2;RPL37A;MVD;NCAM1;FDFT1
mantle zone of p2B	9/301	0.399772	0.99999	0	0	1.13905	1.04435	SDC2;RGS16;PPM1N;WBSCR22;HAS2;EBF3;TMBIM6;LSS;VAMP2
mantle zone of p2ZL	9/301	0.399772	0.99999	0	0	1.13905	1.04435	RAB3C;RIMS3;RGS16;NR2F1;MYO5A;HAS2;RPL27;L1CAM;LSS
medial (fastigial) cerebellar nucleus	9/301	0.399772	0.99999	0	0	1.13905	1.04435	CD63;BTG1;PPM1N;ITGB2;SOX11;S100A4;HSPG2;PBX1;NEUROG2
medial part of the isB	9/301	0.399772	0.99999	0	0	1.13905	1.04435	VAT1;ACLY;RPS17;DPYSL5;SDC2;RPL37A;MVD;NCAM1;FDFT1
nucleus of the stria medullaris (prethalamic)	9/301	0.399772	0.99999	0	0	1.13905	1.04435	SOX2;CD63;TTR;SDC2;RGS16;ID4;DBI;L1CAM;XPR1
oval paracentral nucleus	9/301	0.399772	0.99999	0	0	1.13905	1.04435	RIMS3;YWHAQ;IL1B;RGS16;ITGB2;WBSCR22;L1CAM;LSS;IER3
p1 part of parabrachial pigmented nucleus	9/301	0.399772	0.99999	0	0	1.13905	1.04435	IFITM3;RPS17;FABP5;YWHAQ;SDC2;PPM1N;SNCG;AP2M1;FDFT1
p2 portion of the parabrachial pigmented nucleus	9/301	0.399772	0.99999	0	0	1.13905	1.04435	ANKRD34A;FABP5;YWHAQ;SDC2;PPM1N;SNCG;EBF3;AP2M1;FDFT1
p3 portion of parabrachial pigmented nucleus	9/301	0.399772	0.99999	0	0	1.13905	1.04435	ANKRD34A;FABP5;YWHAQ;SDC2;PPM1N;IGFBP2;SNCG;EBF3;AP2M1
p3 portion of paranigral nucleus	9/301	0.399772	0.99999	0	0	1.13905	1.04435	IFITM3;IL1RN;SDC2;DNER;IGFBP2;S100A6;S100A4;TIMP1;VIM
pallidal septum	9/301	0.399772	0.99999	0	0	1.13905	1.04435	SOX2;SYT4;ALCAM;TTR;PEG10;ID4;ZBTB20;SOX4;XPR1
periventricular part of StrSe	9/301	0.399772	0.99999	0	0	1.13905	1.04435	SOX2;ENC1;ID4;EBF3;DBI;PTN;VIM;B2M;XPR1
periventricular stratum of Pal	9/301	0.399772	0.99999	0	0	1.13905	1.04435	SOX2;TOP2A;TTR;TTYH1;PEG10;ID4;S100A6;DCX;ZBTB20
periventricular stratum of PcPL	9/301	0.399772	0.99999	0	0	1.13905	1.04435	IFITM3;SQLE;CD63;FADS2;YWHAQ;SDC2;FXYD6;PRDX6;YWHAG
periventricular stratum of SeStr	9/301	0.399772	0.99999	0	0	1.13905	1.04435	TOP2A;ALCAM;ID4;DCX;GPC2;ZBTB20;SOX11;PHLDA1;SOX4
periventricular stratum of TTe	9/301	0.399772	0.99999	0	0	1.13905	1.04435	TOP2A;CDH2;DCX;FLNA;SOX11;DBI;HN1;RPS2;SOX4
periventricular stratum of m1AL	9/301	0.399772	0.99999	0	0	1.13905	1.04435	RPS15A;RPS8;STXBP1;TTC3;HMGA1;HAS2;SNCG;EBF3;RPL26
posteromedial visual area, layer 2/3	9/301	0.399772	0.99999	0	0	1.13905	1.04435	IFITM3;ANKRD34A;NGRN;CDKN1A;TRIM28;TNRC18;S100A4;HMGCR;DUSP6
posteromedial visual area, layer 4	9/301	0.399772	0.99999	0	0	1.13905	1.04435	IFITM3;NGRN;CDKN1A;WDR82;TNRC18;PTN;HMGCR;YWHAZ;DUSP6
posteromedial visual area, layer 6a	9/301	0.399772	0.99999	0	0	1.13905	1.04435	CDKN1A;TUBA1B;ZMIZ1;SYP;MAPT;PTN;HMGCR;RAB6B;DUSP6
preopto-hypothalamic area	9/301	0.399772	0.99999	0	0	1.13905	1.04435	PCSK1N;MARCKSL1;CADM1;PEG10;RGS16;USP11;NNAT;FXYD6;RPS21
prerubral area	9/301	0.399772	0.99999	0	0	1.13905	1.04435	YWHAQ;RPS8;SDC2;PPM1N;WBSCR22;HAS2;EBF3;LSS;VAMP2
prethalamic eminence	9/301	0.399772	0.99999	0	0	1.13905	1.04435	SOX2;CD63;TTR;SDC2;RGS16;ID4;DBI;L1CAM;XPR1
r10 portion of the hypoglossal motor nucleus	9/301	0.399772	0.99999	0	0	1.13905	1.04435	TOP2A;DNAJA1;ACLY;LGALS1;ANXA5;MSN;SNX22;PRDX6;YWHAZ
red nucleus, parvicellular part	9/301	0.399772	0.99999	0	0	1.13905	1.04435	IFITM3;RPS17;SLC38A1;FABP5;YWHAQ;SDC2;PPM1N;SNCG;LSS
roof plate of p2 (epithalamic roofplate)	9/301	0.399772	0.99999	0	0	1.13905	1.04435	IFITM3;CD63;FADS2;IL1RN;MMP14;IL1B;ITGB2;DBI;VIM
septopallidal core nucleus	9/301	0.399772	0.99999	0	0	1.13905	1.04435	TOP2A;SFPQ;CADM1;TSC22D1;PEG10;FABP7;NNAT;DCX;ZBTB20
subethmoid nucleus	9/301	0.399772	0.99999	0	0	1.13905	1.04435	RIMS3;YWHAQ;RGS16;CTNNB1;S100A4;L1CAM;AGRN;LSS;IER3
sublayer 6a of OCx	9/301	0.399772	0.99999	0	0	1.13905	1.04435	CAP1;CDKN1A;PTPRS;MYO5A;ATP2A2;TNRC18;HMGCR;KLC1;DUSP6
sublayer 6a of PCx	9/301	0.399772	0.99999	0	0	1.13905	1.04435	TMEFF1;LASP1;PTPRS;LRP1;PPT1;MYO5A;ATP2A2;HMGCR;MLLT3
thalamic (p2) zona limitans domain	9/301	0.399772	0.99999	0	0	1.13905	1.04435	RAB3C;RIMS3;RGS16;NR2F1;MYO5A;HAS2;RPL27;L1CAM;LSS
upper dorsal lateral hypothalamic area	9/301	0.399772	0.99999	0	0	1.13905	1.04435	RPS15;VAT1;RAB31;PEG10;LAPTM5;HAS2;TMBIM6;RPS21;QKI
ventral part of THyB	9/301	0.399772	0.99999	0	0	1.13905	1.04435	IFITM3;TRIM28;RPL12;S100A6;GNAS;SOX11;RPL37;TIMP1;VIM
ventral reuniens nucleus	9/301	0.399772	0.99999	0	0	1.13905	1.04435	SOX2;RAB3C;RIMS3;YWHAQ;DPYSL5;RGS16;CRMP1;L1CAM;AGRN
Rhomboid nucleus	10/345	0.427092	0.99999	0	0	1.10281	0.938218	SOX2;RAB3C;RIMS3;DPYSL5;RGS16;LAPTM5;CTNNB1;EVL;L1CAM;AGRN
Central amygdalar nucleus, capsular part	12/433	0.473276	0.99999	0	0	1.05237	0.787251	GAP43;TTR;RPL21;RPS19;PEG10;IL1B;NR2F1;AP2M1;XPR1;WLS;ACTG1;PRPH
intermediate stratum of DG	16/597	0.511515	0.99999	0	0	1.01608	0.68116	RPS7;RPL31;CCL20;RPL22;RPLP0;ZBTB20;ISLR2;LSS;PBX1;RPS15;RPS15A;RAB31;GNG2;FAU;RPS10;XPR1
AOB, granular layer	8/301	0.542307	0.99999	0	0	1.00704	0.616229	IL1RN;CDKN1A;BTG1;RAB31;IL1B;DCX;SOX4;SMARCA4
Agranular insular area, dorsal part, layer 2/3	8/301	0.542307	0.99999	0	0	1.00704	0.616229	ANKRD34A;ACTR2;CNOT7;SH3BGRL3;HDGF;ACTN4;PTN;TRIB2
Agranular insular area, dorsal part, layer 5	8/301	0.542307	0.99999	0	0	1.00704	0.616229	TMEFF1;ACAP3;ANKRD34A;ACTR2;LASP1;CNOT7;GNG2;HMGCR
Agranular insular area, ventral part	8/301	0.542307	0.99999	0	0	1.00704	0.616229	ANKRD34A;ACTR2;GNG2;PLAUR;ISLR2;ACTN4;HMGCR;PRPH
Agranular insular area, ventral part, layer 6a	8/301	0.542307	0.99999	0	0	1.00704	0.616229	SQLE;ACTR2;GNG2;ISLR2;HMGCR;XPR1;IER3;PRPH
Anteromedial visual area, layer 6b	8/301	0.542307	0.99999	0	0	1.00704	0.616229	CAP1;CDKN1A;PTPRS;ZMIZ1;YWHAB;ATP2A2;HMGCR;PHLDA1
Basomedial amygdalar nucleus, anterior part	8/301	0.542307	0.99999	0	0	1.00704	0.616229	PCSK1N;CDH2;DNER;NR2F1;GNAS;TRIB2;AP2M1;PRPH
Basomedial amygdalar nucleus, posterior part	8/301	0.542307	0.99999	0	0	1.00704	0.616229	GNG2;PRKAR1A;DNER;NR2F1;LCP1;DCAF7;AP2M1;PRPH
Bed nuclei of the stria terminalis, anterior division, fusiform nucleus	8/301	0.542307	0.99999	0	0	1.00704	0.616229	RPS15;VAT1;CADM1;PEG10;USP11;NNAT;ZBTB20;NCAM1
Central amygdalar nucleus, medial part	8/301	0.542307	0.99999	0	0	1.00704	0.616229	PGRMC1;RPS19;RPL21;YWHAB;USP22;NSG1;XPR1;PRPH
Cortical amygdalar area, posterior part, medial zone, layer 3	8/301	0.542307	0.99999	0	0	1.00704	0.616229	MARCKSL1;TSC22D1;RPS7;PKIA;PEA15;NR2F1;HDGF;AP2M1
Endopiriform nucleus	8/301	0.542307	0.99999	0	0	1.00704	0.616229	CAP1;ACTR2;CNOT7;GNG2;RPL21;ISLR2;HMGCR;VAMP2
Gustatory areas, layer 5	8/301	0.542307	0.99999	0	0	1.00704	0.616229	TMEFF1;ACTR2;LASP1;PPT1;PLAUR;ACTN4;FDFT1;PRPH
Hypothalamic medial zone	8/301	0.542307	0.99999	0	0	1.00704	0.616229	CXCL10;PCSK1N;DPYSL5;PEG10;SDC2;PPM1N;SOX11;BUB3
Infralimbic area, layer 6b	8/301	0.542307	0.99999	0	0	1.00704	0.616229	TOP2A;RPL5;CDH2;PPP2R1A;S100A6;CPE;SEPT2;SEPT3
Intralaminar nuclei of the dorsal thalamus	8/301	0.542307	0.99999	0	0	1.00704	0.616229	RAB3C;RIMS3;DPYSL5;RGS16;CTNNB1;EVL;L1CAM;AGRN
Lateral preoptic area	8/301	0.542307	0.99999	0	0	1.00704	0.616229	VAT1;SYT4;PEG10;USP11;NNAT;FXYD6;RPS21;PBX1
Nucleus of Darkschewitsch	8/301	0.542307	0.99999	0	0	1.00704	0.616229	VAT1;ACLY;RPS17;EBF3;TIMP1;AGRN;LSS;VAMP2
Nucleus of Roller	8/301	0.542307	0.99999	0	0	1.00704	0.616229	ACLY;SYT4;LGALS1;RPL12;MSN;SNX22;FAU;PBX1
Olfactory areas	8/301	0.542307	0.99999	0	0	1.00704	0.616229	IL1RN;CDKN1A;IL1B;FABP7;DCX;PLIN2;SOX4;VAMP2
Orbital area, lateral part, layer 5	8/301	0.542307	0.99999	0	0	1.00704	0.616229	ACAP3;IL1RN;LASP1;LRP1;RPS18;MYO5A;SREBF2;IER3
Parabrachial nucleus, lateral division, ventral lateral part	8/301	0.542307	0.99999	0	0	1.00704	0.616229	VAT1;SPARC;RPS18;PRDX1;LAPTM5;RPS20;NCAM1;ATP9A
Pedunculopontine nucleus	8/301	0.542307	0.99999	0	0	1.00704	0.616229	YWHAQ;RPS18;PEG10;RPS6;PLXNA1;SNCG;RPL35A;RPS20
Posterior parietal association areas, layer 4	8/301	0.542307	0.99999	0	0	1.00704	0.616229	ANKRD34A;CDKN1A;WDR82;TNRC18;PTN;HMGCR;HSPG2;DUSP6
Posterior parietal association areas, layer 6b	8/301	0.542307	0.99999	0	0	1.00704	0.616229	NGRN;CDKN1A;PTPRS;MYO5A;ATP2A2;HMGCR;PRPF8;DUSP6
Posterolateral visual area, layer 6b	8/301	0.542307	0.99999	0	0	1.00704	0.616229	CAP1;CNOT7;GNG2;FASN;NR2F1;TNFAIP2;CTNNB1;PRPH
Prelimbic area, layer 6b	8/301	0.542307	0.99999	0	0	1.00704	0.616229	YWHAE;RPL5;FADS2;CDH2;PPP2R1A;CPE;SEPT2;SEPT3
Primary motor area, Layer 5	8/301	0.542307	0.99999	0	0	1.00704	0.616229	TMEFF1;ACAP3;ANKRD34A;NGRN;SH3BGRL3;PTN;HMGCR;MLLT3
Primary somatosensory area, unassigned, layer 6b	8/301	0.542307	0.99999	0	0	1.00704	0.616229	TMEFF1;ACAP3;IL1RN;LRP1;FASN;PLAUR;MVD;MLLT3
Primary visual area, layer 5	8/301	0.542307	0.99999	0	0	1.00704	0.616229	CDKN1A;LASP1;CCL20;TNRC18;PTN;HMGCR;DUSP6;TPT1
Retrosplenial area, dorsal part, layer 6a	8/301	0.542307	0.99999	0	0	1.00704	0.616229	CDKN1A;PTPRS;MYO5A;TNRC18;S100A4;HMGCR;RPS27A;RAB6B
Retrosplenial area, lateral agranular part	8/301	0.542307	0.99999	0	0	1.00704	0.616229	NGRN;CDKN1A;HAS2;TNRC18;S100A4;HMGCR;DUSP6;SMARCA4
Striatum-like amygdalar nuclei	8/301	0.542307	0.99999	0	0	1.00704	0.616229	SOX2;RPS19;RPL21;NR2F1;TRIB2;AP2M1;XPR1;PRPH
Subceruleus nucleus	8/301	0.542307	0.99999	0	0	1.00704	0.616229	VAT1;PEG10;PLXNA1;SNCG;MVD;AP2M1;SEPT2;FDFT1
Ventral medial nucleus of the thalamus	8/301	0.542307	0.99999	0	0	1.00704	0.616229	RAB3C;RIMS3;YWHAQ;RGS16;PPM1N;RPL27;L1CAM;AGRN
basal part of terminal hypothalamus	8/301	0.542307	0.99999	0	0	1.00704	0.616229	CD63;PCSK1N;TRIM28;PEG10;SDC2;RPL12;S100A6;SOX11
caudal zona incerta	8/301	0.542307	0.99999	0	0	1.00704	0.616229	YWHAQ;RPS8;SDC2;IL1B;WBSCR22;RPL35A;TMBIM6;LSS
core part of the anterobasal nucleus	8/301	0.542307	0.99999	0	0	1.00704	0.616229	IFITM3;CXCL10;PCSK1N;TRIM28;RPS7;PEG10;SDC2;HNRNPD
dorsal entopeduncular nucleus	8/301	0.542307	0.99999	0	0	1.00704	0.616229	RPS15;VAT1;NGRN;RAB31;PEG10;HAS2;TMBIM6;RPS21
dorsal part of THyB	8/301	0.542307	0.99999	0	0	1.00704	0.616229	VAT1;CXCL10;PCSK1N;TRIM28;RPS7;PEG10;SDC2;RPS12
insular cortex	8/301	0.542307	0.99999	0	0	1.00704	0.616229	ANKRD34A;ACTR2;CNOT7;GNG2;LAPTM5;PLAUR;ACTN4;IER3
intercalated amygdaloid nuclei	8/301	0.542307	0.99999	0	0	1.00704	0.616229	TMEFF1;GNG2;RPL21;NR2F1;DCAF7;AP2M1;WLS;PRPH
intermediate isthmic part of the dorsal raphe nucleus	8/301	0.542307	0.99999	0	0	1.00704	0.616229	VAT1;ACLY;RPS17;DPYSL5;RPS6;RPL37A;NCAM1;FDFT1
intermediate stratum of PalSe	8/301	0.542307	0.99999	0	0	1.00704	0.616229	SOX2;SYT4;PGRMC1;ALCAM;PEG10;NNAT;ZBTB20;XPR1
intermediate stratum of THyB-D	8/301	0.542307	0.99999	0	0	1.00704	0.616229	VAT1;CXCL10;PCSK1N;TRIM28;RPS7;PEG10;SDC2;RPS12
intermediate stratum of p2ZL	8/301	0.542307	0.99999	0	0	1.00704	0.616229	RAB3C;RIMS3;IL1B;RGS16;NR2F1;HAS2;RPL27;L1CAM
intermediate stratum of r7Lim	8/301	0.542307	0.99999	0	0	1.00704	0.616229	ACLY;SYT4;CXCL10;NRG4;TAGLN2;HLA-A;LSS;EIF4B
interstitial nucleus of the zona limitans	8/301	0.542307	0.99999	0	0	1.00704	0.616229	RAB3C;RIMS3;IL1B;RGS16;NR2F1;HAS2;RPL27;L1CAM
isthmic part of mesencephalic trigeminal nucleus	8/301	0.542307	0.99999	0	0	1.00704	0.616229	ACLY;RPS18;PEG10;PLXNA1;MSN;SNCG;RPS20;NCAM1
lateral SC part of the periaqueductal gray	8/301	0.542307	0.99999	0	0	1.00704	0.616229	RPS15A;RPS8;TTC3;HMGA1;HAS2;SNCG;EBF3;AP2M1
lateral anterior hypothalamic nucleus	8/301	0.542307	0.99999	0	0	1.00704	0.616229	RPS15;PEG10;RGS16;CANX;CIRBP;STMN3;FXYD6;RPS21
lateral part of the lateral habenular nucleus	8/301	0.542307	0.99999	0	0	1.00704	0.616229	CD63;FADS2;RPS17;SCRN1;ITGB2;TNFAIP2;VIM;RPS10
lateral septal nucleus, intermedio-intermediate part	8/301	0.542307	0.99999	0	0	1.00704	0.616229	SOX2;SYT4;PGRMC1;ALCAM;PEG10;NNAT;ZBTB20;XPR1
lateral subhabenular nucleus	8/301	0.542307	0.99999	0	0	1.00704	0.616229	YWHAQ;SCRN1;DPYSL5;SDC2;RGS16;PPM1N;CTNNB1;L1CAM
laterodorsal nucleus	8/301	0.542307	0.99999	0	0	1.00704	0.616229	CD63;TTR;RGS16;IGFBP2;ITGB2;ID4;MLLT3;CNN3
layer 5 of InsCx	8/301	0.542307	0.99999	0	0	1.00704	0.616229	TMEFF1;ANKRD34A;ACTR2;LASP1;GNG2;PPT1;ACTN4;IER3
layer 6b of RSC	8/301	0.542307	0.99999	0	0	1.00704	0.616229	CAP1;CNOT7;FASN;NR2F1;CTNNB1;ATP2A2;HDGF;PAFAH1B1
liminal part of the r7 alar plate	8/301	0.542307	0.99999	0	0	1.00704	0.616229	ACLY;SYT4;CXCL10;NRG4;TAGLN2;HLA-A;LSS;EIF4B
m1 part of parabrachialis pigmentosus	8/301	0.542307	0.99999	0	0	1.00704	0.616229	ANKRD34A;FABP5;FTH1;SDC2;PPM1N;SNCG;ZMPSTE24;FDFT1
m1Lim (VL) part of the periaqueductal gray	8/301	0.542307	0.99999	0	0	1.00704	0.616229	RPL30;PEG10;PPM1N;SNCG;EBF3;MAPT;PRDX6;AP2M1
mantle zone of InsCx	8/301	0.542307	0.99999	0	0	1.00704	0.616229	ANKRD34A;ACTR2;CNOT7;GNG2;LAPTM5;PLAUR;ACTN4;IER3
mantle zone of SePal	8/301	0.542307	0.99999	0	0	1.00704	0.616229	ALCAM;TSC22D1;NRG4;PEG10;SDC2;DCX;ZBTB20;PHLDA1
mantle zone of THyB-D	8/301	0.542307	0.99999	0	0	1.00704	0.616229	VAT1;CXCL10;PCSK1N;TRIM28;RPS7;PEG10;SDC2;RPS12
mantle zone of THyB-P	8/301	0.542307	0.99999	0	0	1.00704	0.616229	PCSK1N;DPYSL5;RPL12;IL1RAPL1;S100A6;GNAS;SOX11;RPL37
mantle zone of p1B	8/301	0.542307	0.99999	0	0	1.00704	0.616229	IFITM3;SLC38A1;FABP5;SDC2;PPM1N;SNCG;EBF3;LSS
mantle zone of r7Lim	8/301	0.542307	0.99999	0	0	1.00704	0.616229	ACLY;SYT4;CXCL10;NRG4;TAGLN2;HLA-A;LSS;EIF4B
medial amygdala, anteroventral part	8/301	0.542307	0.99999	0	0	1.00704	0.616229	ACAP3;ANKRD34A;MARCKSL1;RPL21;NR2F1;HDGF;TRIB2;AP2M1
medial part of the lateral habenular nucleus	8/301	0.542307	0.99999	0	0	1.00704	0.616229	CD63;SCRN1;FABP7;RGS16;PPM1N;ID4;TNFAIP2;CTNNB1
molecular layer of the DG	8/301	0.542307	0.99999	0	0	1.00704	0.616229	RPS17;RPS15A;PKIA;RPL22;ISLR2;ZBTB20;RPS10;XPR1
nucleus of Barrington	8/301	0.542307	0.99999	0	0	1.00704	0.616229	TMEFF1;ACLY;ANKRD34A;RPS17;RPL12;EBF3;PLIN2;NCAM1
oculomotor nucleus, Edinger-Westphal subnucleus	8/301	0.542307	0.99999	0	0	1.00704	0.616229	VAT1;ACLY;RPS17;LGALS1;COX4I1;SNCG;MAPT;FAU
oculomotor nucleus, main part	8/301	0.542307	0.99999	0	0	1.00704	0.616229	ACLY;RPS17;LGALS1;SPP1;MSN;SNCG;YWHAZ;AP2M1
p1 portion of the paranigral nucleus	8/301	0.542307	0.99999	0	0	1.00704	0.616229	SDC2;PPM1N;DNER;SNCG;TIMP1;VIM;LSS;GFAP
p2 portion of the substantia nigra pars compacta	8/301	0.542307	0.99999	0	0	1.00704	0.616229	VAT1;SLC38A1;FABP5;YWHAQ;SDC2;SNCG;VAMP2;AP2M1
p3 part of the ZL core	8/301	0.542307	0.99999	0	0	1.00704	0.616229	RAB3C;RAB31;SDC2;RGS16;NR2F1;MYO5A;HAS2;L1CAM
p3 portion of the substantia nigra pars compacta	8/301	0.542307	0.99999	0	0	1.00704	0.616229	VAT1;SLC38A1;FABP5;YWHAQ;SDC2;SNCG;EBF3;VAMP2
parvocellular part of r8LRt	8/301	0.542307	0.99999	0	0	1.00704	0.616229	TOP2A;TRIM28;TSC22D1;NRG4;PKIA;TIMP1;MMP9;GFAP
perimammillary part of THyB	8/301	0.542307	0.99999	0	0	1.00704	0.616229	PCSK1N;DPYSL5;RPL12;IL1RAPL1;S100A6;GNAS;SOX11;RPL37
periventricular stratum of AOB	8/301	0.542307	0.99999	0	0	1.00704	0.616229	IL1RN;CDKN1A;BTG1;RAB31;IL1B;DCX;SOX4;SMARCA4
periventricular stratum of OB	8/301	0.542307	0.99999	0	0	1.00704	0.616229	IL1RN;CDKN1A;BTG1;IL1B;FABP7;DCX;SOX4;VAMP2
periventricular stratum of isBI	8/301	0.542307	0.99999	0	0	1.00704	0.616229	VAT1;ACLY;RPS17;DPYSL5;RPS6;RPL37A;NCAM1;FDFT1
periventricular stratum of m1Lim	8/301	0.542307	0.99999	0	0	1.00704	0.616229	RPL30;PEG10;PPM1N;SNCG;EBF3;MAPT;PRDX6;AP2M1
periventricular stratum of r10BM	8/301	0.542307	0.99999	0	0	1.00704	0.616229	TOP2A;DNAJA1;ACLY;CXCL10;LGALS1;ANXA5;MSN;SNX22
periventricular stratum of r10Lim	8/301	0.542307	0.99999	0	0	1.00704	0.616229	ACLY;LGALS1;MSN;PLIN2;MVD;SNX22;PRDX6;YWHAZ
periventricular stratum of r1Lim	8/301	0.542307	0.99999	0	0	1.00704	0.616229	SQLE;ACLY;RPS18;RPL37A;SNCG;RPS20;PLIN2;NCAM1
posteromedial visual area	8/301	0.542307	0.99999	0	0	1.00704	0.616229	IFITM3;NGRN;CDKN1A;WDR82;TNRC18;PTN;HMGCR;DUSP6
posteromedial visual area, layer 5	8/301	0.542307	0.99999	0	0	1.00704	0.616229	IFITM3;CDKN1A;TUBA1B;LRP1;TNRC18;PTN;HMGCR;DUSP6
posteroventral part of alar p3	8/301	0.542307	0.99999	0	0	1.00704	0.616229	EEF1G;RAB3C;RAB31;RPS8;RGS16;HAS2;TMBIM6;LSS
r1 part of the 'mesencephalic' trigeminal nucleus	8/301	0.542307	0.99999	0	0	1.00704	0.616229	ACLY;RPS18;PRDX1;PLXNA1;RPS20;MVD;NCAM1;EIF4B
r10 part of vagal motor nucleus	8/301	0.542307	0.99999	0	0	1.00704	0.616229	ACLY;LGALS1;MSN;PLIN2;MVD;SNX22;PRDX6;YWHAZ
r7 part of ventral parvicellular reticular formation	8/301	0.542307	0.99999	0	0	1.00704	0.616229	ACLY;SYT4;CXCL10;NRG4;TAGLN2;HLA-A;LSS;EIF4B
r7 portion of ambiguous motor nucleus	8/301	0.542307	0.99999	0	0	1.00704	0.616229	ACLY;SYT4;CXCL10;MSN;TAGLN2;HLA-A;LSS;EIF4B
r7 portion of the hypoglossal motor nucleus	8/301	0.542307	0.99999	0	0	1.00704	0.616229	ACLY;SYT4;LGALS1;ITGB2;MSN;SNX22;FAU;PBX1
r8 part of lateral reticular nucleus	8/301	0.542307	0.99999	0	0	1.00704	0.616229	TOP2A;TRIM28;TSC22D1;NRG4;IL1B;HLA-A;EIF4B;GFAP
r9 part of the lateral reticular nucleus	8/301	0.542307	0.99999	0	0	1.00704	0.616229	TOP2A;SYT4;TRIM28;NRG4;IL1B;S100A4;EIF4B;GFAP
septopallidal transition area	8/301	0.542307	0.99999	0	0	1.00704	0.616229	ALCAM;TSC22D1;NRG4;PEG10;SDC2;DCX;ZBTB20;PHLDA1
sublayer 6a of CCx	8/301	0.542307	0.99999	0	0	1.00704	0.616229	SQLE;TMEFF1;MYO5A;ATP2A2;DUSP6;SREBF2;VAMP2;SEPT3
sublayer 6b of PCx	8/301	0.542307	0.99999	0	0	1.00704	0.616229	TMEFF1;PTPRS;LRP1;YWHAB;MYO5A;HMGCR;MLLT3;PRPF8
submedius thalamic nucleus	8/301	0.542307	0.99999	0	0	1.00704	0.616229	SOX2;RAB3C;RIMS3;YWHAQ;DPYSL5;RGS16;L1CAM;AGRN
substantia nigra reticulata, isthmic part	8/301	0.542307	0.99999	0	0	1.00704	0.616229	IFITM3;NRG4;LAPTM5;VIM;MMP9;LSS;SMARCA4;GFAP
superficial stratum of Hb	8/301	0.542307	0.99999	0	0	1.00704	0.616229	CD63;FADS2;RPS17;SCRN1;ITGB2;TNFAIP2;VIM;RPS10
superficial stratum of InsCx (cortical plate/marginal zone)	8/301	0.542307	0.99999	0	0	1.00704	0.616229	ANKRD34A;ACTR2;CNOT7;GNG2;LAPTM5;PLAUR;ACTN4;IER3
superficial stratum of PPaA	8/301	0.542307	0.99999	0	0	1.00704	0.616229	RPS15;VAT1;NGRN;RAB31;PEG10;HAS2;TMBIM6;RPS21
superficial stratum of isBI	8/301	0.542307	0.99999	0	0	1.00704	0.616229	IFITM3;NRG4;LAPTM5;VIM;MMP9;LSS;SMARCA4;GFAP
superficial stratum of p2ZL	8/301	0.542307	0.99999	0	0	1.00704	0.616229	RAB3C;RIMS3;YWHAQ;RGS16;PPM1N;L1CAM;AGRN;LSS
superficial stratum of r7Lim	8/301	0.542307	0.99999	0	0	1.00704	0.616229	ACLY;SYT4;CXCL10;MSN;TAGLN2;HLA-A;LSS;EIF4B
thalamic tegmentum	8/301	0.542307	0.99999	0	0	1.00704	0.616229	SDC2;RGS16;PPM1N;HAS2;EBF3;TMBIM6;LSS;VAMP2
ventral endopiriform nucleus	8/301	0.542307	0.99999	0	0	1.00704	0.616229	DNER;HAS2;PTN;HMGCR;VAMP2;AP2M1;ACTG1;PRPH
ventral linear nucleus	8/301	0.542307	0.99999	0	0	1.00704	0.616229	RIMS3;YWHAQ;IL1B;RGS16;WBSCR22;L1CAM;LSS;IER3
ventral posterior parvicellular nucleus	8/301	0.542307	0.99999	0	0	1.00704	0.616229	RIMS3;YWHAQ;IL1B;RGS16;PPM1N;L1CAM;AGRN;LSS
Laterodorsal tegmental nucleus	10/398	0.607865	0.99999	0	0	0.949528	0.472678	TMEFF1;FADS2;ACLY;CD63;RPS17;RPL35;SNCG;PLIN2;FDFT1;RPS12
Accessory olfactory bulb, granular layer	7/301	0.685082	0.99999	0	0	0.876428	0.33148	IL1RN;BTG1;RAB31;IL1B;DCX;SOX4;CNN3
Agranular insular area, dorsal part	7/301	0.685082	0.99999	0	0	0.876428	0.33148	TMEFF1;ANKRD34A;ACTR2;CNOT7;GNG2;ACTN4;TRIB2
Anterior amygdalar area	7/301	0.685082	0.99999	0	0	0.876428	0.33148	ANKRD34A;MARCKSL1;RPS19;IL1B;NR2F1;TRIB2;AP2M1
Anterior cingulate area, dorsal part, layer 6a	7/301	0.685082	0.99999	0	0	0.876428	0.33148	TMEFF1;SCRN1;MYO5A;ATP2A2;SH3BGRL3;SREBF2;SEPT3
Anterior cingulate area, ventral part, 6a	7/301	0.685082	0.99999	0	0	0.876428	0.33148	SQLE;GNB1;PLAUR;MYO5A;LSS;SREBF2;SEPT3
Anterior cingulate area, ventral part, 6b	7/301	0.685082	0.99999	0	0	0.876428	0.33148	YWHAE;SCRN1;PLAUR;MYO5A;ATP2A2;SREBF2;SEPT3
Anterior group of the dorsal thalamus	7/301	0.685082	0.99999	0	0	0.876428	0.33148	TTR;RGS16;IGFBP2;ITGB2;ID4;CTNNB1;L1CAM
Anteroventral preoptic nucleus	7/301	0.685082	0.99999	0	0	0.876428	0.33148	ANKRD34A;NRG4;PEG10;S100A4;UBA1;PBX1;SMARCA4
Bed nuclei of the stria terminalis, anterior division, rhomboid nucleus	7/301	0.685082	0.99999	0	0	0.876428	0.33148	SOX2;CADM1;MAGED1;PEG10;NNAT;ZBTB20;RPS2
Copula pyramidis	7/301	0.685082	0.99999	0	0	0.876428	0.33148	CADM3;BTG1;ZMIZ1;ITGB2;ATN1;VIM;SNRNP200
Copula pyramidis, granular layer	7/301	0.685082	0.99999	0	0	0.876428	0.33148	CADM3;BTG1;ITGB2;ATN1;VIM;SNRNP200;PBX1
Copula pyramidis, molecular layer	7/301	0.685082	0.99999	0	0	0.876428	0.33148	CADM3;BTG1;ZMIZ1;ITGB2;ATN1;VIM;SNRNP200
Crus 2	7/301	0.685082	0.99999	0	0	0.876428	0.33148	CADM3;H1F0;BTG1;PTPRZ1;ZMIZ1;STMN2;ATN1
Crus 2, granular layer	7/301	0.685082	0.99999	0	0	0.876428	0.33148	CADM3;H1F0;BTG1;PTPRZ1;ZMIZ1;STMN2;ATN1
Endopiriform nucleus, dorsal part	7/301	0.685082	0.99999	0	0	0.876428	0.33148	ACTR2;GNG2;RPL21;ISLR2;HMGCR;SREBF2;VAMP2
Gustatory areas, layer 6b	7/301	0.685082	0.99999	0	0	0.876428	0.33148	GNG2;YWHAB;ACTN4;SREBF2;XPR1;IER3;PRPH
Intercalated amygdalar nucleus	7/301	0.685082	0.99999	0	0	0.876428	0.33148	TMEFF1;RPL21;NR2F1;AP2M1;WLS;ACTG1;PRPH
Interpeduncular nucleus	7/301	0.685082	0.99999	0	0	0.876428	0.33148	CXCL10;IL1RN;SDC2;S100A6;TIMP1;VIM;GFAP
JcP contribution to LTL	7/301	0.685082	0.99999	0	0	0.876428	0.33148	RPL18A;PKIA;RGS16;PEA15;ZBTB20;RPL37;FGFBP3
Koelliker-Fuse nucleus	7/301	0.685082	0.99999	0	0	0.876428	0.33148	VAT1;ZMIZ1;CFL1;LAPTM5;RPS20;NCAM1;ATP9A
Lateral reticular nucleus	7/301	0.685082	0.99999	0	0	0.876428	0.33148	TOP2A;SYT4;TRIM28;NRG4;S100A4;EIF4B;GFAP
Lateral reticular nucleus, magnocellular part	7/301	0.685082	0.99999	0	0	0.876428	0.33148	TOP2A;SYT4;TRIM28;NRG4;S100A4;EIF4B;GFAP
Lateral septal complex	7/301	0.685082	0.99999	0	0	0.876428	0.33148	SOX2;SYT4;ID4;ZBTB20;PTN;SOX4;XPR1
Lateral septal nucleus	7/301	0.685082	0.99999	0	0	0.876428	0.33148	SOX2;SYT4;ALCAM;ID4;ZBTB20;SOX4;XPR1
Lateral septal nucleus, caudal (caudodorsal) part	7/301	0.685082	0.99999	0	0	0.876428	0.33148	SOX2;MMP14;ENC1;ID4;DBI;PTN;B2M
Lateral septal nucleus, rostral (rostroventral) part	7/301	0.685082	0.99999	0	0	0.876428	0.33148	SOX2;SYT4;ALCAM;PEG10;ZBTB20;SOX4;XPR1
Lateral visual area, layer 6b	7/301	0.685082	0.99999	0	0	0.876428	0.33148	CAP1;CDKN1A;CNOT7;GNG2;PLAUR;CTNNB1;HNRNPC
Main olfactory bulb	7/301	0.685082	0.99999	0	0	0.876428	0.33148	IL1RN;CDKN1A;IL1B;FABP7;DCX;PLIN2;SOX4
Main olfactory bulb, glomerular layer	7/301	0.685082	0.99999	0	0	0.876428	0.33148	IFITM3;IL1RN;IL1B;FABP7;DCX;PLIN2;SOX4
Main olfactory bulb, granule layer	7/301	0.685082	0.99999	0	0	0.876428	0.33148	IL1RN;CDKN1A;BTG1;FABP7;DCX;SOX4;VAMP2
Main olfactory bulb, inner plexiform layer	7/301	0.685082	0.99999	0	0	0.876428	0.33148	IL1RN;CDKN1A;IL1B;FABP7;DCX;SOX4;VAMP2
Main olfactory bulb, mitral layer	7/301	0.685082	0.99999	0	0	0.876428	0.33148	IL1RN;CDKN1A;IL1B;FABP7;DCX;SOX4;VAMP2
Main olfactory bulb, outer plexiform layer	7/301	0.685082	0.99999	0	0	0.876428	0.33148	IL1RN;CDKN1A;IL1B;FABP7;DCX;PLIN2;SOX4
Medial amygdalar nucleus, posterodorsal part, sublayer a	7/301	0.685082	0.99999	0	0	0.876428	0.33148	MARCKSL1;RPL21;DNER;APLP1;NR2F1;HDGF;DBN1
Mediodorsal nucleus of thalamus	7/301	0.685082	0.99999	0	0	0.876428	0.33148	RAB3C;RIMS3;RGS16;PPM1N;ID4;CTNNB1;L1CAM
Mediodorsal nucleus of the thalamus, medial part	7/301	0.685082	0.99999	0	0	0.876428	0.33148	RAB3C;RIMS3;DPYSL5;RGS16;PPM1N;CTNNB1;L1CAM
Midbrain, behavioral state related	7/301	0.685082	0.99999	0	0	0.876428	0.33148	VAT1;ACLY;IL1RN;SDC2;SNCG;TIMP1;VIM
Nucleus ambiguus	7/301	0.685082	0.99999	0	0	0.876428	0.33148	TOP2A;CXCL10;NRG4;HLA-A;LSS;EIF4B;ZMPSTE24
Nucleus ambiguus, ventral division	7/301	0.685082	0.99999	0	0	0.876428	0.33148	CXCL10;TRIM28;NRG4;HLA-A;LSS;EIF4B;ZMPSTE24
Nucleus of the solitary tract	7/301	0.685082	0.99999	0	0	0.876428	0.33148	VAT1;APC2;FASN;SOX11;TAGLN2;PLIN2;MVD
OB glomerular layer	7/301	0.685082	0.99999	0	0	0.876428	0.33148	IFITM3;IL1RN;IL1B;FABP7;DCX;PLIN2;SOX4
OB granular layer	7/301	0.685082	0.99999	0	0	0.876428	0.33148	IL1RN;CDKN1A;BTG1;IL1B;FABP7;DCX;SOX4
OB outer plexiform layer	7/301	0.685082	0.99999	0	0	0.876428	0.33148	IL1RN;CDKN1A;IL1B;FABP7;DCX;PLIN2;SOX4
Orbital area, medial part, layer 6a	7/301	0.685082	0.99999	0	0	0.876428	0.33148	CDKN1A;RBFOX2;PPT1;S100A6;ATP2A2;SH3BGRL3;HDGF
Orbital area, ventrolateral part	7/301	0.685082	0.99999	0	0	0.876428	0.33148	IL1RN;CDKN1A;IL1B;LAPTM5;S100A6;SOX4;NEUROG2
Orbital area, ventrolateral part, layer 2/3	7/301	0.685082	0.99999	0	0	0.876428	0.33148	IL1RN;CDKN1A;IL1B;LAPTM5;S100A6;SOX4;NEUROG2
Orbital area, ventrolateral part, layer 5	7/301	0.685082	0.99999	0	0	0.876428	0.33148	IL1RN;CDKN1A;LRP1;RPS18;S100A6;PTN;SREBF2
Orbital area, ventrolateral part, layer 6a	7/301	0.685082	0.99999	0	0	0.876428	0.33148	TOP2A;NGRN;CDKN1A;S100A6;GPC2;SREBF2;VAMP2
Paramedian lobule, molecular layer	7/301	0.685082	0.99999	0	0	0.876428	0.33148	CADM3;BTG1;PTPRZ1;ZMIZ1;ATN1;VIM;SNRNP200
Posterior parietal association areas, layer 5	7/301	0.685082	0.99999	0	0	0.876428	0.33148	CDKN1A;LASP1;MYO5A;TNRC18;PTN;HMGCR;DUSP6
Prelimbic area	7/301	0.685082	0.99999	0	0	0.876428	0.33148	IL1RN;KIF5C;S100A6;SH3BGRL3;NEUROG2;ATP9A;SMARCA4
Prelimbic area, layer 2/3	7/301	0.685082	0.99999	0	0	0.876428	0.33148	SYT4;IL1RN;S100A6;TNFAIP2;NEUROG2;ATP9A;SMARCA4
Primary motor area	7/301	0.685082	0.99999	0	0	0.876428	0.33148	TMEFF1;ACAP3;ANKRD34A;NGRN;SH3BGRL3;HMGCR;MLLT3
Primary motor area, Layer 6a	7/301	0.685082	0.99999	0	0	0.876428	0.33148	TMEFF1;NGRN;SCRN1;LRP1;MYO5A;ATP2A2;MLLT3
Primary somatosensory area, lower limb, layer 6a	7/301	0.685082	0.99999	0	0	0.876428	0.33148	TMEFF1;NGRN;SCRN1;LRP1;MYO5A;MLLT3;PRPF8
Primary somatosensory area, nose, layer 5	7/301	0.685082	0.99999	0	0	0.876428	0.33148	LASP1;PPT1;PLAUR;PTN;B2M;PRPF8;FDFT1
Primary somatosensory area, trunk, layer 6b	7/301	0.685082	0.99999	0	0	0.876428	0.33148	ACAP3;LASP1;LRP1;FASN;PPT1;HAS2;MLLT3
Primary somatosensory area, upper limb, layer 6b	7/301	0.685082	0.99999	0	0	0.876428	0.33148	TMEFF1;ACAP3;LRP1;KIF5C;FASN;MYO5A;MLLT3
Primary visual area, layer 4	7/301	0.685082	0.99999	0	0	0.876428	0.33148	CDKN1A;LASP1;CCL20;TNRC18;PTN;HMGCR;DUSP6
Primary visual area, layer 6a	7/301	0.685082	0.99999	0	0	0.876428	0.33148	CDKN1A;LASP1;CNOT7;MYO5A;ATP2A2;HMGCR;DUSP6
Red nucleus	7/301	0.685082	0.99999	0	0	0.876428	0.33148	IFITM3;RPS17;FABP5;SDC2;PPM1N;SNCG;FDFT1
Supramammillary nucleus, medial part	7/301	0.685082	0.99999	0	0	0.876428	0.33148	SYT4;IL1RN;DPYSL5;DNER;S100A6;S100A4;TIMP1
Taenia tecta, dorsal part, layer 4	7/301	0.685082	0.99999	0	0	0.876428	0.33148	TOP2A;CDH2;DCX;FLNA;SOX11;SOX4;VAMP2
Tuberomammillary nucleus	7/301	0.685082	0.99999	0	0	0.876428	0.33148	TRIM28;RPL12;S100A6;ZBTB20;NCAM1;TIMP1;VIM
Ventral tegmental area	7/301	0.685082	0.99999	0	0	0.876428	0.33148	IFITM3;FABP5;SDC2;PPM1N;SNCG;EBF3;FDFT1
anterior olfactory area, ventral part	7/301	0.685082	0.99999	0	0	0.876428	0.33148	IL1RN;DCX;HAS2;PTN;YBX1;SOX4;VAMP2
basal plate of p1	7/301	0.685082	0.99999	0	0	0.876428	0.33148	IFITM3;FABP5;SDC2;PPM1N;SNCG;EBF3;LSS
basal plate of p2	7/301	0.685082	0.99999	0	0	0.876428	0.33148	SDC2;PPM1N;HAS2;EBF3;TMBIM6;LSS;VAMP2
basomedial amygdaloid nucleus, posterior part	7/301	0.685082	0.99999	0	0	0.876428	0.33148	MARCKSL1;TSC22D1;PRKAR1A;YWHAB;DNER;NR2F1;AP2M1
bed nucleus of stria terminalis, lateral amygdaloid division	7/301	0.685082	0.99999	0	0	0.876428	0.33148	CD63;FADS2;TTR;ITGB2;DBI;SNX22;LSS
bed nucleus of the external capsule	7/301	0.685082	0.99999	0	0	0.876428	0.33148	CAP1;ACTR2;GNG2;SCRN1;ID4;HMGCR;SREBF2
dorsal pallium/isocortex	7/301	0.685082	0.99999	0	0	0.876428	0.33148	ACAP3;ENC1;TNRC18;PTN;HMGCR;MLLT3;DUSP6
dorsal peduncular cortex, intermediate part	7/301	0.685082	0.99999	0	0	0.876428	0.33148	TOP2A;CDH2;DCX;FLNA;SOX4;VAMP2;SEPT2
dorsal tier of thalamus	7/301	0.685082	0.99999	0	0	0.876428	0.33148	RAB3C;RIMS3;RGS16;ID4;CTNNB1;L1CAM;CLASP2
dorsomedial preoptic area, superficial part	7/301	0.685082	0.99999	0	0	0.876428	0.33148	ANKRD34A;NRG4;PEG10;TNFAIP2;S100A4;UBA1;PBX1
ethmoid nucleus	7/301	0.685082	0.99999	0	0	0.876428	0.33148	RIMS3;YWHAQ;RGS16;S100A4;L1CAM;LSS;IER3
hypothalamic amygdala	7/301	0.685082	0.99999	0	0	0.876428	0.33148	MARCKSL1;RPS19;RPL21;DNER;NR2F1;TRIB2;AP2M1
intermediate part of THyB	7/301	0.685082	0.99999	0	0	0.876428	0.33148	CD63;PCSK1N;TRIM28;SDC2;RPL12;S100A6;SOX11
intermediate stratum of ITTh	7/301	0.685082	0.99999	0	0	0.876428	0.33148	RIMS3;YWHAQ;RGS16;S100A4;L1CAM;LSS;IER3
intermediate stratum of LPrP	7/301	0.685082	0.99999	0	0	0.876428	0.33148	ACTR2;GNG2;YWHAB;ISLR2;HMGCR;SREBF2;IER3
intermediate stratum of SePal	7/301	0.685082	0.99999	0	0	0.876428	0.33148	TOP2A;ALCAM;TSC22D1;PEG10;DCX;ZBTB20;PHLDA1
intermediate stratum of TTe	7/301	0.685082	0.99999	0	0	0.876428	0.33148	TOP2A;CDH2;DCX;FLNA;SOX4;VAMP2;SEPT2
intermediate stratum of p1B	7/301	0.685082	0.99999	0	0	0.876428	0.33148	IFITM3;FABP5;SDC2;PPM1N;SNCG;EBF3;LSS
intermediate stratum of r1BL	7/301	0.685082	0.99999	0	0	0.876428	0.33148	MMP14;FABP5;RPS18;NRG4;PLXNA1;SNCG;RPL37
intermediate stratum of the PBC	7/301	0.685082	0.99999	0	0	0.876428	0.33148	RPS18;PRDX1;PLXNA1;MSN;RPS20;NCAM1;SERF2
intermediate stratum of the VAP	7/301	0.685082	0.99999	0	0	0.876428	0.33148	MARCKSL1;YWHAB;DNER;NR2F1;DCAF7;AP2M1;PRPH
isthmic portion of paranigral nucleus	7/301	0.685082	0.99999	0	0	0.876428	0.33148	TUBA1A;YWHAQ;SCRN1;SDC2;DNER;AP2M1;GFAP
isthmic roof plate	7/301	0.685082	0.99999	0	0	0.876428	0.33148	CD63;FADS2;BTG1;PTPRZ1;PKIA;DBI;VIM
lateral part of alar p2	7/301	0.685082	0.99999	0	0	0.876428	0.33148	RAB3C;RIMS3;RGS16;ID4;CTNNB1;L1CAM;CLASP2
lateral part of preisthmic periaqueductal gray	7/301	0.685082	0.99999	0	0	0.876428	0.33148	RPS18;RPS8;HMGA1;HAS2;SNCG;EBF3;AGRN
lateral wings of the dorsal raphe nucleus	7/301	0.685082	0.99999	0	0	0.876428	0.33148	ANKRD34A;RPS17;RPL12;PPM1N;EBF3;NCAM1;YWHAZ
layer 2 of AOV cortex	7/301	0.685082	0.99999	0	0	0.876428	0.33148	IL1RN;DCX;PTN;YBX1;SOX4;VAMP2;AP2M1
layer 3 of OCx	7/301	0.685082	0.99999	0	0	0.876428	0.33148	CDKN1A;TNRC18;HLA-A;PTN;HMGCR;DUSP6;SMARCA4
layer 3 of VPrP cortex	7/301	0.685082	0.99999	0	0	0.876428	0.33148	ACTR2;MARCKSL1;DNER;PTN;HMGCR;VAMP2;AP2M1
layer 5 of PCx	7/301	0.685082	0.99999	0	0	0.876428	0.33148	LASP1;LRP1;KIF5C;MYO5A;ATP2A2;TNRC18;PTN
layer 6 of FCx	7/301	0.685082	0.99999	0	0	0.876428	0.33148	TMEFF1;ACAP3;LASP1;LRP1;MYO5A;MLLT3;SEPT3
layer 6 of InsCx	7/301	0.685082	0.99999	0	0	0.876428	0.33148	ACTR2;LASP1;GNG2;PPT1;PLAUR;ACTN4;IER3
layer 6 of PCx	7/301	0.685082	0.99999	0	0	0.876428	0.33148	LASP1;LRP1;KIF5C;PPT1;MYO5A;ATP2A2;IER3
layer 6 of PaS	7/301	0.685082	0.99999	0	0	0.876428	0.33148	CAP1;CDKN1A;CNOT7;NR2F1;HDGF;TRIB2;PAFAH1B1
liminal part of alar r1	7/301	0.685082	0.99999	0	0	0.876428	0.33148	LGALS1;RPS18;PLXNA1;SNCG;RPS20;RPL37;LCP1
m1 part of paranigral nucleus	7/301	0.685082	0.99999	0	0	0.876428	0.33148	YWHAQ;SDC2;PPM1N;DNER;SNCG;VIM;GFAP
m1B part of the periaqueductal gray	7/301	0.685082	0.99999	0	0	0.876428	0.33148	VAT1;ACLY;RPS17;LGALS1;COX4I1;FAU;AP2M1
m2 part of nucleus parabrachialis pigmentosus	7/301	0.685082	0.99999	0	0	0.876428	0.33148	ANKRD34A;DPYSL5;FTH1;SDC2;PPM1N;ZMPSTE24;FDFT1
mantle zone of AHy	7/301	0.685082	0.99999	0	0	0.876428	0.33148	MARCKSL1;RPS19;RPL21;DNER;NR2F1;TRIB2;AP2M1
mantle zone of AOV	7/301	0.685082	0.99999	0	0	0.876428	0.33148	IL1RN;DCX;HAS2;PTN;YBX1;SOX4;VAMP2
mantle zone of DTTh	7/301	0.685082	0.99999	0	0	0.876428	0.33148	RAB3C;RIMS3;RGS16;ID4;CTNNB1;L1CAM;CLASP2
mantle zone of SeStr	7/301	0.685082	0.99999	0	0	0.876428	0.33148	TOP2A;ALCAM;DCX;ZBTB20;SOX11;PHLDA1;SOX4
mantle zone of THyB-I	7/301	0.685082	0.99999	0	0	0.876428	0.33148	CD63;PCSK1N;TRIM28;SDC2;RPL12;S100A6;SOX11
mantle zone of p3B	7/301	0.685082	0.99999	0	0	0.876428	0.33148	FABP5;SDC2;IL1B;HAS2;EBF3;TMBIM6;VAMP2
mantle zone of r1Lim	7/301	0.685082	0.99999	0	0	0.876428	0.33148	LGALS1;RPS18;PLXNA1;SNCG;RPS20;RPL37;LCP1
medial (magnocellular) part of MD	7/301	0.685082	0.99999	0	0	0.876428	0.33148	RAB3C;RIMS3;DPYSL5;RGS16;CTNNB1;L1CAM;CLASP2
medial (main) part of Med	7/301	0.685082	0.99999	0	0	0.876428	0.33148	CD63;PPM1N;RPLP0;IGFBP2;ITGB2;S100A4;HSPG2
medial amygdala, posterodorsal part	7/301	0.685082	0.99999	0	0	0.876428	0.33148	CNOT7;RPL21;DNER;NR2F1;DBN1;AP2M1;XPR1
medial habenular nucleus	7/301	0.685082	0.99999	0	0	0.876428	0.33148	CD63;FADS2;MMP14;SCRN1;ITGB2;ZBTB20;VIM
medial parabrachial nucleus	7/301	0.685082	0.99999	0	0	0.876428	0.33148	RPS18;PRDX1;PLXNA1;MSN;RPS20;NCAM1;SERF2
neuropeptide-S nucleus	7/301	0.685082	0.99999	0	0	0.876428	0.33148	TMEFF1;ACLY;RPS17;SNCG;PLIN2;RPS27A;FDFT1
pallium	7/301	0.685082	0.99999	0	0	0.876428	0.33148	IL1RN;ENC1;GNB1;DCX;PTN;HMGCR;DUSP6
paraseptal subpallium	7/301	0.685082	0.99999	0	0	0.876428	0.33148	TOP2A;ALCAM;PEG10;DCX;ZBTB20;PHLDA1;SOX4
periventricular stratum of APal	7/301	0.685082	0.99999	0	0	0.876428	0.33148	CD63;FADS2;TTR;ITGB2;DBI;SNX22;LSS
periventricular stratum of cerebellar vermis	7/301	0.685082	0.99999	0	0	0.876428	0.33148	CADM3;BTG1;PTPRZ1;S100A4;VIM;SNRNP200;PBX1
periventricular stratum of m1B	7/301	0.685082	0.99999	0	0	0.876428	0.33148	VAT1;ACLY;RPS17;LGALS1;COX4I1;FAU;AP2M1
periventricular stratum of m2AL	7/301	0.685082	0.99999	0	0	0.876428	0.33148	RPS18;RPS8;HMGA1;HAS2;SNCG;EBF3;AGRN
periventricular stratum of r4Ve	7/301	0.685082	0.99999	0	0	0.876428	0.33148	CD63;RPS17;TTR;IGFBP2;ITGB2;DBI;WLS
periventricular stratum of r7BM	7/301	0.685082	0.99999	0	0	0.876428	0.33148	ACLY;ITGB2;SNCG;TIMP1;SNX22;FAU;PBX1
periventricular stratum of r9BM	7/301	0.685082	0.99999	0	0	0.876428	0.33148	TOP2A;ACLY;LGALS1;RPL12;ANXA5;MSN;SNX22
posterolateral cortical amygdaloid area	7/301	0.685082	0.99999	0	0	0.876428	0.33148	MARCKSL1;TRIM28;RPS7;PKIA;IL1RAPL1;PLIN2;PRPH
posteromedial visual area, layer 1	7/301	0.685082	0.99999	0	0	0.876428	0.33148	IFITM3;NGRN;TRIM28;TAGLN2;TNRC18;S100A4;DUSP6
posteromedial visual area, layer 6b	7/301	0.685082	0.99999	0	0	0.876428	0.33148	CNOT7;CDH2;CCL20;MSN;HDGF;HMGCR;KLC1
pretectal tegmentum	7/301	0.685082	0.99999	0	0	0.876428	0.33148	IFITM3;FABP5;SDC2;PPM1N;SNCG;EBF3;LSS
principal pretectal nucleus	7/301	0.685082	0.99999	0	0	0.876428	0.33148	PKIA;PPM1N;ISLR2;ZBTB20;RPL27;PGM2L1;PRRC2A
prosomere 2	7/301	0.685082	0.99999	0	0	0.876428	0.33148	RAB3C;RIMS3;RGS16;ID4;CTNNB1;L1CAM;LSS
r1 part of basolateral reticular formation	7/301	0.685082	0.99999	0	0	0.876428	0.33148	MMP14;FABP5;RPS18;NRG4;PLXNA1;SNCG;RPL37
r2 part of median raphe nucleus	7/301	0.685082	0.99999	0	0	0.876428	0.33148	YWHAQ;PPM1N;SPP1;RPL37;L1CAM;YWHAZ;AP2M1
r2 part of prepontine raphe nucleus	7/301	0.685082	0.99999	0	0	0.876428	0.33148	YWHAQ;PPM1N;SPP1;RPL26;AGRN;YWHAZ;AP2M1
r3 part of medial pontine nuclei	7/301	0.685082	0.99999	0	0	0.876428	0.33148	COX4I1;ANXA5;SPP1;HMGA1;STMN3;NEFL;PHLDA1
r4 part of parvocellular medial vestibular nucleus	7/301	0.685082	0.99999	0	0	0.876428	0.33148	CD63;RPS17;TTR;IGFBP2;ITGB2;DBI;WLS
r4 part of reticulotegmental nucleus, shell portion	7/301	0.685082	0.99999	0	0	0.876428	0.33148	APC2;STXBP1;CAPRIN1;ANXA5;ATP5A1;SPP1;ZMPSTE24
r5 part of A5 noradrenergic cell group	7/301	0.685082	0.99999	0	0	0.876428	0.33148	ACLY;LGALS1;YWHAQ;GPC2;LCP1;MMP9;PRPH
r6 alar plate	7/301	0.685082	0.99999	0	0	0.876428	0.33148	ACLY;LGALS1;NRG4;RPL12;MSN;SOX11;EIF4B
r7 part of the nucleus of Roller	7/301	0.685082	0.99999	0	0	0.876428	0.33148	CXCL10;FABP5;ZC3H8;SNCG;TIMP1;SNX22;FDFT1
r8 portion of the hypoglossal motor nucleus	7/301	0.685082	0.99999	0	0	0.876428	0.33148	ACLY;LGALS1;RPL12;MSN;SNX22;FAU;PBX1
r9 part of basomedial reticular formation	7/301	0.685082	0.99999	0	0	0.876428	0.33148	TOP2A;DNAJA1;LGALS1;RPL12;MSN;SNCG;SNX22
r9 part of external cuneate nucleus	7/301	0.685082	0.99999	0	0	0.876428	0.33148	VAT1;APC2;HMGA1;TAGLN2;PLIN2;MVD;YWHAZ
rostral secondary prosencephalon	7/301	0.685082	0.99999	0	0	0.876428	0.33148	VAT1;PCSK1N;TRIM28;PEG10;SDC2;RPS21;PBX1
rostral ventrolateral reticular area	7/301	0.685082	0.99999	0	0	0.876428	0.33148	TRIM28;NRG4;GPC2;HLA-A;LSS;EIF4B;ZMPSTE24
rostromedial tegmental nucleus	7/301	0.685082	0.99999	0	0	0.876428	0.33148	RPS7;YWHAQ;SPP1;RPL37;L1CAM;AP2M1;GFAP
septostriatal transition area (accumbens)	7/301	0.685082	0.99999	0	0	0.876428	0.33148	TOP2A;ALCAM;DCX;ZBTB20;SOX11;PHLDA1;SOX4
shell of VMH	7/301	0.685082	0.99999	0	0	0.876428	0.33148	VAT1;CD63;PCSK1N;TRIM28;RPS7;PEG10;SDC2
sublayer 6a of FCx	7/301	0.685082	0.99999	0	0	0.876428	0.33148	TMEFF1;ACAP3;LASP1;LRP1;MYO5A;MLLT3;SEPT3
sublayer 6b of FCx	7/301	0.685082	0.99999	0	0	0.876428	0.33148	TMEFF1;ACAP3;LRP1;PPP2R1A;FASN;MYO5A;MLLT3
subpallial septum	7/301	0.685082	0.99999	0	0	0.876428	0.33148	SOX2;SYT4;ALCAM;PEG10;ID4;ZBTB20;XPR1
superficial mantle of isBM	7/301	0.685082	0.99999	0	0	0.876428	0.33148	VAT1;YWHAQ;SDC2;WBSCR22;SNCG;L1CAM;LSS
superficial stratum of AHy	7/301	0.685082	0.99999	0	0	0.876428	0.33148	MARCKSL1;RPS19;RPL21;DNER;NR2F1;TRIB2;AP2M1
superficial stratum of AOV	7/301	0.685082	0.99999	0	0	0.876428	0.33148	IL1RN;DCX;HAS2;PTN;YBX1;SOX4;VAMP2
superficial stratum of CoPD	7/301	0.685082	0.99999	0	0	0.876428	0.33148	RPS15A;RPL18A;PKIA;ISLR2;ZBTB20;XPR1;PRRC2A
superficial stratum of JcPL	7/301	0.685082	0.99999	0	0	0.876428	0.33148	RPL18A;PKIA;RGS16;PEA15;ZBTB20;RPL37;FGFBP3
superficial stratum of OB	7/301	0.685082	0.99999	0	0	0.876428	0.33148	IFITM3;IL1RN;IL1B;FABP7;TNFAIP2;PLIN2;CNN3
superficial stratum of PO1	7/301	0.685082	0.99999	0	0	0.876428	0.33148	ANKRD34A;NRG4;PEG10;TNFAIP2;S100A4;UBA1;PBX1
superficial stratum of m2B	7/301	0.685082	0.99999	0	0	0.876428	0.33148	VAT1;YWHAQ;SDC2;SNCG;VIM;AP2M1;GFAP
superficial stratum of r2BM	7/301	0.685082	0.99999	0	0	0.876428	0.33148	RPS7;YWHAQ;SPP1;RPL37;L1CAM;AP2M1;GFAP
superficial stratum of r3BM	7/301	0.685082	0.99999	0	0	0.876428	0.33148	COX4I1;ANXA5;SPP1;HMGA1;STMN3;NEFL;PHLDA1
superficial stratum of r7BL	7/301	0.685082	0.99999	0	0	0.876428	0.33148	TRIM28;NRG4;GPC2;HLA-A;LSS;EIF4B;ZMPSTE24
superficial stratum of r9Ve	7/301	0.685082	0.99999	0	0	0.876428	0.33148	VAT1;APC2;HMGA1;TAGLN2;PLIN2;MVD;YWHAZ
ventral pallium	7/301	0.685082	0.99999	0	0	0.876428	0.33148	IL1RN;CDKN1A;IL1B;FABP7;DCX;PLIN2;SOX4
ventral premammillary nucleus (migrated)	7/301	0.685082	0.99999	0	0	0.876428	0.33148	PCSK1N;TRIM28;SDC2;RPL12;GNAS;MSN;SOX11
ventrolateral part of VMH	7/301	0.685082	0.99999	0	0	0.876428	0.33148	VAT1;PCSK1N;RPS19;TRIM28;PEG10;SDC2;STMN3
ventromedial nucleus	7/301	0.685082	0.99999	0	0	0.876428	0.33148	RAB3C;RIMS3;YWHAQ;RGS16;RPL27;L1CAM;AGRN
ventromedial preoptic nucleus	7/301	0.685082	0.99999	0	0	0.876428	0.33148	TRIM28;PEG10;RGS16;NNAT;UBA1;TIMP1;GFAP
vertical nucleus of the diagonal band	7/301	0.685082	0.99999	0	0	0.876428	0.33148	VAT1;CXCL10;ALCAM;PEG10;USP11;DNER;AP2M1
white matter of cerebellar vermis	7/301	0.685082	0.99999	0	0	0.876428	0.33148	CADM3;BTG1;PTPRZ1;S100A4;VIM;SNRNP200;PBX1
Medial mammillary nucleus	9/388	0.69945	0.99999	0	0	0.873595	0.312276	IFITM3;CXCL10;IL1RN;DPYSL5;RPL12;S100A6;SOX11;RPL37;TIMP1
Ventral tegmental nucleus	9/391	0.707965	0.99999	0	0	0.866598	0.299289	SOX2;RPS17;TUBA1A;ATCAY;MVD;NCAM1;VAT1L;FDFT1;RPS12
Dorsal tegmental nucleus	9/396	0.72181	0.99999	0	0	0.855178	0.278782	SOX2;FADS2;RPS6;IGFBP2;RPL37A;HNRNPA2B1;MVD;FDFT1;CNN3
Field CA3	7/336	0.7871	0.99999	0	0	0.781762	0.187153	RPS7;RPL22;LAPTM5;ISLR2;ZBTB20;PLXNA1;VAMP2
Claustrum	8/386	0.802688	0.99999	0	0	0.777127	0.170804	ACAP3;ACTR2;GNG2;RPL21;ISLR2;HMGCR;SREBF2;IER3
Field CA2, stratum oriens	9/431	0.806403	0.99999	0	0	0.782812	0.168439	TOP2A;MMP14;TTR;YWHAB;ZBTB20;PLXNA1;SH3BGRL3;MLLT3;VAMP2
A4 noradrenergic cell group	6/301	0.80955	0.99999	0	0	0.747204	0.157867	CD63;TTR;IGFBP2;ITGB2;DBI;WLS
AOB, glomerular layer	6/301	0.80955	0.99999	0	0	0.747204	0.157867	IL1RN;RAB31;IL1B;DCX;SOX4;SMARCA4
AOB, internal plexiform layer	6/301	0.80955	0.99999	0	0	0.747204	0.157867	IL1RN;RAB31;IL1B;DCX;SOX4;SMARCA4
Accessory facial motor nucleus	6/301	0.80955	0.99999	0	0	0.747204	0.157867	LGALS1;YWHAQ;SNCG;LCP1;MMP9;PRPH
Agranular insular area, ventral part, layer 2/3	6/301	0.80955	0.99999	0	0	0.747204	0.157867	ANKRD34A;ACTR2;GNG2;PLAUR;TRIB2;PRPH
Agranular insular area, ventral part, layer 5	6/301	0.80955	0.99999	0	0	0.747204	0.157867	ACTR2;GNG2;ISLR2;HMGCR;XPR1;PRPH
Ansiform lobule	6/301	0.80955	0.99999	0	0	0.747204	0.157867	CADM3;BTG1;PTPRZ1;STMN2;ATN1;VIM
Anteromedial nucleus, dorsal part	6/301	0.80955	0.99999	0	0	0.747204	0.157867	RAB3C;RIMS3;RGS16;ID4;L1CAM;AP2M1
Anteromedial nucleus, ventral part	6/301	0.80955	0.99999	0	0	0.747204	0.157867	RAB3C;RIMS3;RGS16;ID4;L1CAM;AP2M1
Anteromedial visual area, layer 1	6/301	0.80955	0.99999	0	0	0.747204	0.157867	CDKN1A;TRIM28;ENC1;TAGLN2;DUSP6;SMARCA4
Basolateral amygdalar nucleus, ventral part	6/301	0.80955	0.99999	0	0	0.747204	0.157867	MARCKSL1;NR2F1;PLAUR;PLIN2;DCAF7;AP2M1
Basomedial amygdalar nucleus	6/301	0.80955	0.99999	0	0	0.747204	0.157867	PRKAR1A;DNER;NR2F1;DCAF7;AP2M1;PRPH
Bed nuclei of the stria terminalis, anterior division, oval nucleus	6/301	0.80955	0.99999	0	0	0.747204	0.157867	SOX2;TTYH1;PEG10;S100A6;ZBTB20;SOX4
Bed nucleus of the accessory olfactory tract	6/301	0.80955	0.99999	0	0	0.747204	0.157867	IFITM3;MARCKSL1;RPL21;TNFAIP2;HDGF;PRDX6
Central linear nucleus raphe	6/301	0.80955	0.99999	0	0	0.747204	0.157867	TMEFF1;GNG2;YWHAQ;SCRN1;SDC2;AP2M1
Cerebellar cortex	6/301	0.80955	0.99999	0	0	0.747204	0.157867	CADM3;BTG1;PTPRZ1;ATN1;VIM;SNRNP200
Cerebellum	6/301	0.80955	0.99999	0	0	0.747204	0.157867	CADM3;BTG1;PTPRZ1;ATN1;VIM;SNRNP200
Cortical amygdalar area, anterior part, layer 2	6/301	0.80955	0.99999	0	0	0.747204	0.157867	MARCKSL1;TRIM28;PSAP;TRIB2;AP2M1;PRPH
Cortical amygdalar area, posterior part, lateral zone, layer 1	6/301	0.80955	0.99999	0	0	0.747204	0.157867	MMP14;MARCKSL1;TRIM28;IL1RAPL1;SNX22;RPS13
Cortical amygdalar area, posterior part, lateral zone, layer 3	6/301	0.80955	0.99999	0	0	0.747204	0.157867	MARCKSL1;TSC22D1;RPS7;PKIA;NR2F1;AP2M1
Cortical amygdalar area, posterior part, medial zone	6/301	0.80955	0.99999	0	0	0.747204	0.157867	MARCKSL1;TSC22D1;PKIA;PEA15;NR2F1;AP2M1
Crus 1	6/301	0.80955	0.99999	0	0	0.747204	0.157867	BTG1;PTPRZ1;STMN2;ATN1;VIM;SNRNP200
Crus 1, molecular layer	6/301	0.80955	0.99999	0	0	0.747204	0.157867	BTG1;PTPRZ1;STMN2;ATN1;VIM;SNRNP200
Crus 2, molecular layer	6/301	0.80955	0.99999	0	0	0.747204	0.157867	CADM3;BTG1;PTPRZ1;ZMIZ1;STMN2;ATN1
Declive (VI)	6/301	0.80955	0.99999	0	0	0.747204	0.157867	CADM3;BTG1;PTPRZ1;VIM;PBX1;SEPT2
Declive (VI), granular layer	6/301	0.80955	0.99999	0	0	0.747204	0.157867	CADM3;BTG1;PTPRZ1;VIM;PBX1;SEPT2
Declive (VI), molecular layer	6/301	0.80955	0.99999	0	0	0.747204	0.157867	CADM3;BTG1;PTPRZ1;VIM;SNRNP200;SEPT2
Field CA3, stratum pyramidale	6/301	0.80955	0.99999	0	0	0.747204	0.157867	RPS7;LAPTM5;ISLR2;ZBTB20;PLXNA1;VAMP2
Hypothalamic lateral zone	6/301	0.80955	0.99999	0	0	0.747204	0.157867	RPS15;VAT1;PEG10;FXYD6;TMBIM6;RPS21
Inferior olivary complex	6/301	0.80955	0.99999	0	0	0.747204	0.157867	TOP2A;TRIM28;TIMP1;RPS13;SMARCA4;GFAP
Interbrain	6/301	0.80955	0.99999	0	0	0.747204	0.157867	RAB3C;RIMS3;RGS16;ID4;L1CAM;RPS21
Lateral visual area	6/301	0.80955	0.99999	0	0	0.747204	0.157867	CDKN1A;PLAUR;PLIN2;HNRNPC;HMGCR;RPS27A
Lateral visual area, layer 6a	6/301	0.80955	0.99999	0	0	0.747204	0.157867	CDKN1A;PLAUR;CTNNB1;ATP2A2;HNRNPC;HMGCR
Lobules IV-V, granular layer	6/301	0.80955	0.99999	0	0	0.747204	0.157867	CADM3;BTG1;PTPRZ1;ATN1;VIM;SNRNP200
Medial amygdalar nucleus	6/301	0.80955	0.99999	0	0	0.747204	0.157867	MARCKSL1;RPL21;NR2F1;HDGF;PRDX6;AP2M1
Medial amygdalar nucleus, posterodorsal part	6/301	0.80955	0.99999	0	0	0.747204	0.157867	FADS2;TTR;RPL21;DNER;NR2F1;DBN1
Medial amygdalar nucleus, posterodorsal part, sublayer b	6/301	0.80955	0.99999	0	0	0.747204	0.157867	FADS2;TTR;DNER;NR2F1;XPR1;PRRC2A
Medial geniculate complex	6/301	0.80955	0.99999	0	0	0.747204	0.157867	RPL18A;PKIA;RGS16;RPL11;ZBTB20;FGFBP3
Medial group of the dorsal thalamus	6/301	0.80955	0.99999	0	0	0.747204	0.157867	RAB3C;RIMS3;DPYSL5;RGS16;CTNNB1;L1CAM
Medial habenula	6/301	0.80955	0.99999	0	0	0.747204	0.157867	CD63;FADS2;SCRN1;ITGB2;VIM;XPR1
Medial septal complex	6/301	0.80955	0.99999	0	0	0.747204	0.157867	SYT4;CXCL10;ALCAM;PEG10;PABPC4;UBA1
Mediodorsal nucleus of the thalamus, central part	6/301	0.80955	0.99999	0	0	0.747204	0.157867	RAB3C;RIMS3;RGS16;PPM1N;CTNNB1;L1CAM
Mediodorsal nucleus of the thalamus, lateral part	6/301	0.80955	0.99999	0	0	0.747204	0.157867	RAB3C;RIMS3;RGS16;ID4;CTNNB1;L1CAM
Nucleus of the solitary tract, medial part	6/301	0.80955	0.99999	0	0	0.747204	0.157867	APC2;RPL12;SOX11;TAGLN2;PLIN2;MVD
Nucleus prepositus	6/301	0.80955	0.99999	0	0	0.747204	0.157867	SYT4;TTR;ITGB2;RPL37;SNX22;PBX1
OB inner plexiform layer	6/301	0.80955	0.99999	0	0	0.747204	0.157867	IL1RN;CDKN1A;IL1B;FABP7;DCX;SOX4
OB mitral cell layer	6/301	0.80955	0.99999	0	0	0.747204	0.157867	IL1RN;CDKN1A;FABP7;DCX;SOX4;VAMP2
OB olfactory fiber layer	6/301	0.80955	0.99999	0	0	0.747204	0.157867	IFITM3;IL1B;FABP7;TNFAIP2;PLIN2;CNN3
Orbital area, medial part	6/301	0.80955	0.99999	0	0	0.747204	0.157867	IL1RN;S100A6;TNFAIP2;HAS2;HSPG2;NEUROG2
Orbital area, medial part, layer 1	6/301	0.80955	0.99999	0	0	0.747204	0.157867	IL1RN;TNFAIP2;DCX;HAS2;HSPG2;NEUROG2
Orbital area, medial part, layer 5	6/301	0.80955	0.99999	0	0	0.747204	0.157867	IL1RN;CDKN1A;S100A6;SH3BGRL3;HN1;ATP9A
Parabrachial nucleus	6/301	0.80955	0.99999	0	0	0.747204	0.157867	SPARC;RPS18;PEG10;PRDX1;RPS20;NCAM1
Parabrachial nucleus, lateral division	6/301	0.80955	0.99999	0	0	0.747204	0.157867	SPARC;RPS18;PRDX1;PLXNA1;RPS20;NCAM1
Parabrachial nucleus, lateral division, central lateral part	6/301	0.80955	0.99999	0	0	0.747204	0.157867	RPS18;PLXNA1;MSN;RPS20;NCAM1;SERF2
Paragigantocellular reticular nucleus, lateral part	6/301	0.80955	0.99999	0	0	0.747204	0.157867	TOP2A;TRIM28;NRG4;HLA-A;EIF4B;GFAP
Paramedian lobule	6/301	0.80955	0.99999	0	0	0.747204	0.157867	CADM3;BTG1;PTPRZ1;ZMIZ1;ATN1;VIM
Perihypoglossal nuclei	6/301	0.80955	0.99999	0	0	0.747204	0.157867	SYT4;TTR;ITGB2;RPL37;SNX22;PBX1
Piriform-amygdalar area, polymorph layer	6/301	0.80955	0.99999	0	0	0.747204	0.157867	MARCKSL1;TRIM28;TSC22D1;PKIA;PLIN2;AP2M1
Posterior parietal association areas, layer 2/3	6/301	0.80955	0.99999	0	0	0.747204	0.157867	CDKN1A;ENC1;TNRC18;UBA1;HSPG2;DUSP6
Posterolateral visual area, layer 5	6/301	0.80955	0.99999	0	0	0.747204	0.157867	CDKN1A;LASP1;PLAUR;PTN;HMGCR;DUSP6
Postsubiculum, layer 3	6/301	0.80955	0.99999	0	0	0.747204	0.157867	CAP1;CDKN1A;CNOT7;NR2F1;HDGF;TRIB2
Prelimbic area, layer 1	6/301	0.80955	0.99999	0	0	0.747204	0.157867	SQLE;IL1RN;DCX;NEUROG2;ATP9A;SMARCA4
Prelimbic area, layer 6a	6/301	0.80955	0.99999	0	0	0.747204	0.157867	RBFOX2;S100A6;MYO5A;ATP2A2;SH3BGRL3;SEPT3
Primary somatosensory area, barrel field, layer 6a	6/301	0.80955	0.99999	0	0	0.747204	0.157867	LASP1;LRP1;KIF5C;PPT1;PLAUR;MVD
Primary somatosensory area, barrel field, layer 6b	6/301	0.80955	0.99999	0	0	0.747204	0.157867	ACTR2;KIF5C;PLAUR;MVD;ACTN4;IER3
Primary somatosensory area, lower limb, layer 6b	6/301	0.80955	0.99999	0	0	0.747204	0.157867	TMEFF1;SCRN1;LRP1;MYO5A;MLLT3;PRPF8
Primary somatosensory area, mouth, layer 4	6/301	0.80955	0.99999	0	0	0.747204	0.157867	LASP1;CIRBP;PLAUR;TNRC18;PTN;B2M
Primary somatosensory area, mouth, layer 6a	6/301	0.80955	0.99999	0	0	0.747204	0.157867	TMEFF1;ACAP3;LASP1;KIF5C;PPT1;MLLT3
Primary somatosensory area, trunk	6/301	0.80955	0.99999	0	0	0.747204	0.157867	WDR82;ENC1;TNRC18;HMGCR;MLLT3;DUSP6
Primary somatosensory area, trunk, layer 5	6/301	0.80955	0.99999	0	0	0.747204	0.157867	LASP1;CNOT7;LRP1;ATP2A2;TNRC18;PTN
Primary somatosensory area, unassigned	6/301	0.80955	0.99999	0	0	0.747204	0.157867	CNOT7;PLAUR;ACTN4;PTN;MLLT3;PRPH
Primary visual area	6/301	0.80955	0.99999	0	0	0.747204	0.157867	CDKN1A;CCL20;TNRC18;PTN;HMGCR;DUSP6
Retrosplenial area, lateral agranular part, layer 1	6/301	0.80955	0.99999	0	0	0.747204	0.157867	CDKN1A;TRIM28;PABPC4;ENC1;DUSP6;SMARCA4
Retrosplenial area, lateral agranular part, layer 5	6/301	0.80955	0.99999	0	0	0.747204	0.157867	CDKN1A;TNRC18;S100A4;HMGCR;DUSP6;SMARCA4
Simple lobule	6/301	0.80955	0.99999	0	0	0.747204	0.157867	CADM3;BTG1;PTPRZ1;ZMIZ1;ATN1;VIM
Simple lobule, granular layer	6/301	0.80955	0.99999	0	0	0.747204	0.157867	CADM3;BTG1;PTPRZ1;ZMIZ1;ATN1;VIM
Subparafascicular nucleus	6/301	0.80955	0.99999	0	0	0.747204	0.157867	RAB3C;RIMS3;YWHAQ;RGS16;RPL24;LSS
Superior colliculus, sensory related	6/301	0.80955	0.99999	0	0	0.747204	0.157867	IFITM3;MMP14;S100A6;RPL27;UBA1;SMARCA4
Superior olivary complex, lateral part	6/301	0.80955	0.99999	0	0	0.747204	0.157867	LGALS1;GPC2;RPL37;HLA-A;LCP1;MMP9
Thalamus, polymodal association cortex related	6/301	0.80955	0.99999	0	0	0.747204	0.157867	RAB3C;RIMS3;RGS16;ID4;CTNNB1;L1CAM
Ventral group of the dorsal thalamus	6/301	0.80955	0.99999	0	0	0.747204	0.157867	RIMS3;IL1B;RGS16;NR2F1;MYO5A;L1CAM
Ventral posterolateral nucleus of the thalamus	6/301	0.80955	0.99999	0	0	0.747204	0.157867	RAB31;RGS16;NR2F1;ID4;HAS2;CLASP2
Ventral posteromedial nucleus of the thalamus, parvicellular part	6/301	0.80955	0.99999	0	0	0.747204	0.157867	YWHAQ;IL1B;RGS16;PPM1N;L1CAM;LSS
Ventromedial hypothalamic nucleus, ventrolateral part	6/301	0.80955	0.99999	0	0	0.747204	0.157867	VAT1;PCSK1N;TRIM28;PEG10;SDC2;STMN3
Visceral area, layer 6b	6/301	0.80955	0.99999	0	0	0.747204	0.157867	GNG2;PLAUR;AP2M1;IER3;MTDH;FDFT1
anterior pretectal nucleus, dorsal core part	6/301	0.80955	0.99999	0	0	0.747204	0.157867	NGRN;RIMS3;RGS16;LAPTM5;HAS2;S100A4
anteroventral part of alar thalamus	6/301	0.80955	0.99999	0	0	0.747204	0.157867	RAB3C;RIMS3;RGS16;HAS2;L1CAM;LSS
basal plate of p3	6/301	0.80955	0.99999	0	0	0.747204	0.157867	FABP5;SDC2;PABPC4;IL1B;EBF3;TMBIM6
caudate nucleus	6/301	0.80955	0.99999	0	0	0.747204	0.157867	TOP2A;RAB31;TTR;ID4;GPC2;SOX11
central amygdaloid nucleus, medial part	6/301	0.80955	0.99999	0	0	0.747204	0.157867	RPL21;PABPC4;MSN;PLIN2;LSS;PRPH
central lateral nucleus	6/301	0.80955	0.99999	0	0	0.747204	0.157867	RIMS3;RGS16;ID4;CTNNB1;L1CAM;IER3
central part of MD	6/301	0.80955	0.99999	0	0	0.747204	0.157867	RAB3C;RIMS3;DPYSL5;RGS16;PPM1N;L1CAM
cerebellar white matter	6/301	0.80955	0.99999	0	0	0.747204	0.157867	CADM3;BTG1;PTPRZ1;ZMIZ1;STMN2;ATN1
core part of DTg	6/301	0.80955	0.99999	0	0	0.747204	0.157867	SOX2;HNRNPA2B1;RPS6;IGFBP2;RPL37A;FDFT1
cortex of cerebellar hemisphere	6/301	0.80955	0.99999	0	0	0.747204	0.157867	CADM3;BTG1;PTPRZ1;ZMIZ1;ATN1;VIM
deep gray layer of SC	6/301	0.80955	0.99999	0	0	0.747204	0.157867	RPS8;STXBP1;TTC3;PLXNA1;SNCG;EBF3
dorsal part of JcP	6/301	0.80955	0.99999	0	0	0.747204	0.157867	IFITM3;FADS2;SDC2;FABP7;DBI;PRDX6
dorsal part of alar p2	6/301	0.80955	0.99999	0	0	0.747204	0.157867	CD63;FADS2;MMP14;SCRN1;ITGB2;VIM
dorsal part of m1A	6/301	0.80955	0.99999	0	0	0.747204	0.157867	RPS8;RPL27A;PKIA;RPL37A;SNCG;RPS24
dorsal spiriform nucleus	6/301	0.80955	0.99999	0	0	0.747204	0.157867	IFITM3;FADS2;SDC2;FABP7;PPM1N;PRDX6
dorsofrontal pretectal nucleus	6/301	0.80955	0.99999	0	0	0.747204	0.157867	YWHAQ;FABP7;RGS16;CTNNB1;L1CAM;YWHAG
dorsolateral TG part of the periaqueductal gray	6/301	0.80955	0.99999	0	0	0.747204	0.157867	TRIM28;RPS8;STXBP1;HNRNPA2B1;SNCG;AGRN
external part of AOD	6/301	0.80955	0.99999	0	0	0.747204	0.157867	IL1RN;RAB31;DCX;HAS2;SOX4;SMARCA4
habenula (old epithalamus)	6/301	0.80955	0.99999	0	0	0.747204	0.157867	CD63;FADS2;MMP14;SCRN1;ITGB2;VIM
hippocampus (cortex Ammonis)	6/301	0.80955	0.99999	0	0	0.747204	0.157867	LAPTM5;ISLR2;ZBTB20;PLXNA1;CRMP1;VAMP2
intercalate nucleus	6/301	0.80955	0.99999	0	0	0.747204	0.157867	RAB31;RGS16;NR2F1;ID4;HAS2;RPL27
intermediate part of r10B	6/301	0.80955	0.99999	0	0	0.747204	0.157867	TOP2A;LGALS1;HMGA1;MSN;SNX22;YWHAZ
intermediate pretectal nucleus	6/301	0.80955	0.99999	0	0	0.747204	0.157867	PPM1N;CTNNB1;RPL27;FGFBP3;YWHAG;MAP4K4
intermediate stratum of APal	6/301	0.80955	0.99999	0	0	0.747204	0.157867	RPL21;PABPC4;MSN;PLIN2;LSS;PRPH
intermediate stratum of JcPD	6/301	0.80955	0.99999	0	0	0.747204	0.157867	IFITM3;FADS2;SDC2;FABP7;DBI;PRDX6
intermediate stratum of Mam	6/301	0.80955	0.99999	0	0	0.747204	0.157867	IFITM3;CXCL10;IL1RN;S100A6;RPL37;TIMP1
intermediate stratum of OB	6/301	0.80955	0.99999	0	0	0.747204	0.157867	IL1RN;CDKN1A;IL1B;FABP7;DCX;SOX4
intermediate stratum of PcPD	6/301	0.80955	0.99999	0	0	0.747204	0.157867	YWHAQ;FABP7;RGS16;CTNNB1;L1CAM;YWHAG
intermediate stratum of PcPL	6/301	0.80955	0.99999	0	0	0.747204	0.157867	NGRN;RIMS3;RGS16;LAPTM5;HAS2;S100A4
intermediate stratum of RtC	6/301	0.80955	0.99999	0	0	0.747204	0.157867	RAB31;TTR;RGS16;NR2F1;ID4;HAS2
intermediate stratum of TSPaA	6/301	0.80955	0.99999	0	0	0.747204	0.157867	IFITM3;CXCL10;PEG10;USP11;HNRNPD;PRRC2B
intermediate stratum of VTTh	6/301	0.80955	0.99999	0	0	0.747204	0.157867	RIMS3;YWHAQ;RGS16;L1CAM;LSS;IER3
intermediate stratum of m2B	6/301	0.80955	0.99999	0	0	0.747204	0.157867	IL1B;RPL12;DPYSL3;PLXNA1;SNCG;EBF3
intermediate stratum of p3ZL	6/301	0.80955	0.99999	0	0	0.747204	0.157867	RAB31;RGS16;NR2F1;ID4;HAS2;RPL27
intermediate stratum of r1Lim	6/301	0.80955	0.99999	0	0	0.747204	0.157867	LGALS1;RPS18;RPS20;RPL37;LCP1;MMP9
intermediate tier of thalamus	6/301	0.80955	0.99999	0	0	0.747204	0.157867	RIMS3;RGS16;CTNNB1;S100A4;L1CAM;LSS
internal granular layer of CbHCx	6/301	0.80955	0.99999	0	0	0.747204	0.157867	CADM3;BTG1;PTPRZ1;ZMIZ1;ATN1;VIM
internal granular layer of CbVCx	6/301	0.80955	0.99999	0	0	0.747204	0.157867	CADM3;BTG1;PTPRZ1;ATN1;VIM;SNRNP200
island of Calleja major	6/301	0.80955	0.99999	0	0	0.747204	0.157867	ALCAM;TSC22D1;PEG10;DCX;ZBTB20;PHLDA1
juxtacommissural pretectal domain	6/301	0.80955	0.99999	0	0	0.747204	0.157867	NGRN;RPL27A;PKIA;RGS16;LAPTM5;PRDX6
lateral (parvicellular) part of MD	6/301	0.80955	0.99999	0	0	0.747204	0.157867	RAB3C;RIMS3;RGS16;ID4;CTNNB1;L1CAM
lateral IC periaqueductal gray	6/301	0.80955	0.99999	0	0	0.747204	0.157867	RPS8;HMGA1;HAS2;SNCG;EBF3;RPL26
lateral TG part of the periaqueductal gray	6/301	0.80955	0.99999	0	0	0.747204	0.157867	RPS15A;RPS8;STXBP1;TTC3;HNRNPA2B1;SNCG
lateral parabrachial nucleus	6/301	0.80955	0.99999	0	0	0.747204	0.157867	VAT1;SYT4;SPARC;PRDX1;RPS20;NCAM1
lateral part of alar p3	6/301	0.80955	0.99999	0	0	0.747204	0.157867	RAB31;TTR;RGS16;NR2F1;ID4;HAS2
lateral part of r6B	6/301	0.80955	0.99999	0	0	0.747204	0.157867	LGALS1;NRG4;RPL12;GPC2;MSN;HLA-A
lateral part of r8B	6/301	0.80955	0.99999	0	0	0.747204	0.157867	TOP2A;CXCL10;TRIM28;NRG4;HLA-A;GFAP
lateral superior olive	6/301	0.80955	0.99999	0	0	0.747204	0.157867	LGALS1;NRG4;LAPTM5;GPC2;HLA-A;LCP1
lateral terminal nucleus of the accessory optic tract, lateral part	6/301	0.80955	0.99999	0	0	0.747204	0.157867	SPARC;RPL18A;PKIA;LAPTM5;ZBTB20;GFAP
layer 2 of LOT	6/301	0.80955	0.99999	0	0	0.747204	0.157867	ACAP3;MARCKSL1;RPL21;IL1B;HDGF;AP2M1
layer 3 of AOD cortex	6/301	0.80955	0.99999	0	0	0.747204	0.157867	TOP2A;IL1RN;DCX;HAS2;PTN;SOX4
layer 4 of FCx	6/301	0.80955	0.99999	0	0	0.747204	0.157867	ACAP3;ANKRD34A;TRIM2;SH3BGRL3;PTN;MLLT3
layer 4 of InsCx	6/301	0.80955	0.99999	0	0	0.747204	0.157867	ACTR2;LASP1;ACTN4;PTN;TRIB2;PRPH
layer 5 of FCx	6/301	0.80955	0.99999	0	0	0.747204	0.157867	TMEFF1;LASP1;KIF5C;ATP2A2;SH3BGRL3;PTN
layer 6a of PaS	6/301	0.80955	0.99999	0	0	0.747204	0.157867	CAP1;CNOT7;CCL20;NR2F1;HDGF;TRIB2
layer 6b of PaS	6/301	0.80955	0.99999	0	0	0.747204	0.157867	TOP2A;CAP1;CDKN1A;CNOT7;NR2F1;HDGF
liminal alar domain of m1	6/301	0.80955	0.99999	0	0	0.747204	0.157867	PEG10;PPM1N;SNCG;EBF3;MAPT;PRDX6
liminal part of alar isthmus	6/301	0.80955	0.99999	0	0	0.747204	0.157867	PEG10;RPS6;SNCG;EBF3;RPS20;FXYD6
m2 part of substantia nigra compacta	6/301	0.80955	0.99999	0	0	0.747204	0.157867	VAT1;NRG4;SDC2;WBSCR22;L1CAM;LSS
magnocellular diagonal band nucleus	6/301	0.80955	0.99999	0	0	0.747204	0.157867	SOX2;ACAP3;MARCKSL1;RPL21;STMN3;AP2M1
mantle zone of AOB	6/301	0.80955	0.99999	0	0	0.747204	0.157867	IL1RN;RAB31;IL1B;DCX;SOX4;SMARCA4
mantle zone of CA	6/301	0.80955	0.99999	0	0	0.747204	0.157867	LAPTM5;ISLR2;ZBTB20;PLXNA1;CRMP1;VAMP2
mantle zone of Hb	6/301	0.80955	0.99999	0	0	0.747204	0.157867	CD63;FADS2;MMP14;SCRN1;ITGB2;VIM
mantle zone of ITTh	6/301	0.80955	0.99999	0	0	0.747204	0.157867	RIMS3;RGS16;CTNNB1;S100A4;L1CAM;LSS
mantle zone of JcPD	6/301	0.80955	0.99999	0	0	0.747204	0.157867	IFITM3;FADS2;SDC2;FABP7;DBI;PRDX6
mantle zone of OB	6/301	0.80955	0.99999	0	0	0.747204	0.157867	IL1RN;CDKN1A;IL1B;FABP7;DCX;SOX4
mantle zone of RtC	6/301	0.80955	0.99999	0	0	0.747204	0.157867	RAB31;TTR;RGS16;NR2F1;ID4;HAS2
mantle zone of SeDg	6/301	0.80955	0.99999	0	0	0.747204	0.157867	VAT1;NRG4;PEG10;NNAT;ZBTB20;RPS21
mantle zone of StrSe	6/301	0.80955	0.99999	0	0	0.747204	0.157867	SOX2;SYT4;ALCAM;ID4;EBF3;XPR1
mantle zone of TPaA	6/301	0.80955	0.99999	0	0	0.747204	0.157867	PEG10;RGS16;NNAT;FXYD6;RPS21;VAT1L
mantle zone of isLim	6/301	0.80955	0.99999	0	0	0.747204	0.157867	PEG10;RPS6;SNCG;EBF3;RPS20;FXYD6
mantle zone of m1AD	6/301	0.80955	0.99999	0	0	0.747204	0.157867	RPS8;RPL27A;PKIA;RPL37A;SNCG;RPS24
mantle zone of m1Lim	6/301	0.80955	0.99999	0	0	0.747204	0.157867	PEG10;PPM1N;SNCG;EBF3;MAPT;PRDX6
mantle zone of r10BI	6/301	0.80955	0.99999	0	0	0.747204	0.157867	TOP2A;LGALS1;HMGA1;MSN;SNX22;YWHAZ
mantle zone of r1Tr	6/301	0.80955	0.99999	0	0	0.747204	0.157867	LGALS1;RPS18;SPP1;RPS20;NEUROG2;ATP9A
mantle zone of r6BL	6/301	0.80955	0.99999	0	0	0.747204	0.157867	LGALS1;NRG4;RPL12;GPC2;MSN;HLA-A
mantle zone of r8BL	6/301	0.80955	0.99999	0	0	0.747204	0.157867	TOP2A;CXCL10;TRIM28;NRG4;HLA-A;GFAP
mantle zone of r9Ve	6/301	0.80955	0.99999	0	0	0.747204	0.157867	EBF3;TAGLN2;PLIN2;UBA1;MVD;YWHAZ
mantle zone of the Fc	6/301	0.80955	0.99999	0	0	0.747204	0.157867	IFITM3;MMP14;IL1B;ITGB2;ZBTB20;LSS
medial geniculate nucleus	6/301	0.80955	0.99999	0	0	0.747204	0.157867	RPL18A;PKIA;RGS16;RPL11;ZBTB20;FGFBP3
medial subhabenular nucleus	6/301	0.80955	0.99999	0	0	0.747204	0.157867	CD63;FADS2;SCRN1;DPYSL5;ITGB2;ID4
medial superior olive	6/301	0.80955	0.99999	0	0	0.747204	0.157867	LGALS1;NRG4;PABPC4;IL1B;RPL12;RPS13
mediodorsal nucleus	6/301	0.80955	0.99999	0	0	0.747204	0.157867	RAB3C;RIMS3;RGS16;ID4;CTNNB1;L1CAM
molecular layer of CbHCx	6/301	0.80955	0.99999	0	0	0.747204	0.157867	CADM3;BTG1;PTPRZ1;ATN1;VIM;SNRNP200
olfactory bulb, principal part	6/301	0.80955	0.99999	0	0	0.747204	0.157867	IL1RN;CDKN1A;IL1B;FABP7;DCX;SOX4
p1 part of the substantia nigra compacta	6/301	0.80955	0.99999	0	0	0.747204	0.157867	SPARC;YWHAQ;SDC2;SNCG;VAMP2;AP2M1
p2 part of the zona limitans core population	6/301	0.80955	0.99999	0	0	0.747204	0.157867	RAB3C;RAB31;IL1B;RGS16;HAS2;L1CAM
parabrachial part of the periaqueductal gray	6/301	0.80955	0.99999	0	0	0.747204	0.157867	FADS2;RPS18;PKIA;NNAT;SNCG;EBF3
parvicellular (lateral) subparafascicular nucleus	6/301	0.80955	0.99999	0	0	0.747204	0.157867	RIMS3;YWHAQ;RGS16;L1CAM;LSS;IER3
parvicellular part of Lat	6/301	0.80955	0.99999	0	0	0.747204	0.157867	TTR;CCL20;ITGB2;DBI;SNX22;PBX1
periventricular stratum of CbH	6/301	0.80955	0.99999	0	0	0.747204	0.157867	CADM3;BTG1;PTPRZ1;ZMIZ1;STMN2;ATN1
periventricular stratum of Hb	6/301	0.80955	0.99999	0	0	0.747204	0.157867	CD63;FADS2;MMP14;SCRN1;ITGB2;VIM
periventricular stratum of RMa	6/301	0.80955	0.99999	0	0	0.747204	0.157867	IFITM3;IL1RN;S100A6;S100A4;TIMP1;VIM
periventricular stratum of Str	6/301	0.80955	0.99999	0	0	0.747204	0.157867	TOP2A;RAB31;TTR;ID4;GPC2;SOX11
periventricular stratum of TG	6/301	0.80955	0.99999	0	0	0.747204	0.157867	TRIM28;RPS8;STXBP1;HNRNPA2B1;SNCG;AGRN
periventricular stratum of r5Ve	6/301	0.80955	0.99999	0	0	0.747204	0.157867	RPS17;TTR;IGFBP2;ITGB2;SOX11;WLS
periventricular stratum of the PBC	6/301	0.80955	0.99999	0	0	0.747204	0.157867	FADS2;RPS18;PKIA;NNAT;SNCG;EBF3
posterior intralaminar nucleus	6/301	0.80955	0.99999	0	0	0.747204	0.157867	RIMS3;YWHAQ;RGS16;L1CAM;LSS;IER3
posterodorsal tegmental nucleus	6/301	0.80955	0.99999	0	0	0.747204	0.157867	SYT4;TTR;HNRNPA2B1;IGFBP2;ZC3H8;YBX1
prethalamic tegmentum	6/301	0.80955	0.99999	0	0	0.747204	0.157867	FABP5;SDC2;PABPC4;IL1B;EBF3;TMBIM6
prosomere 3	6/301	0.80955	0.99999	0	0	0.747204	0.157867	RAB31;TTR;RGS16;NR2F1;HAS2;TMBIM6
r1 part of basomedial reticular formation	6/301	0.80955	0.99999	0	0	0.747204	0.157867	YWHAQ;PPM1N;SPP1;LSS;SMARCA4;GFAP
r1 part of dorsal raphe nucleus	6/301	0.80955	0.99999	0	0	0.747204	0.157867	SOX2;ACLY;RPS17;RPL37A;MVD;FDFT1
r1 part of trigeminal sensory column	6/301	0.80955	0.99999	0	0	0.747204	0.157867	LGALS1;RPS18;SPP1;RPS20;NEUROG2;ATP9A
r1 part of ventral parvicellular reticular formation	6/301	0.80955	0.99999	0	0	0.747204	0.157867	LGALS1;RPS18;RPS20;RPL37;LCP1;MMP9
r10 alar plate	6/301	0.80955	0.99999	0	0	0.747204	0.157867	LGALS1;MSN;TAGLN2;PLIN2;SNX22;YWHAZ
r3 part of lateral pontine nuclei	6/301	0.80955	0.99999	0	0	0.747204	0.157867	NRG4;COX4I1;SPP1;HLA-A;RPS13;GFAP
r3 part of reticulotegmental nucleus, shell portion	6/301	0.80955	0.99999	0	0	0.747204	0.157867	APC2;COX4I1;ANXA5;SPP1;HMGA1;YWHAZ
r5 part of parvocellular medial vestibular nucleus	6/301	0.80955	0.99999	0	0	0.747204	0.157867	RPS17;TTR;IGFBP2;ITGB2;SOX11;WLS
r7 part of nucleus prepositus	6/301	0.80955	0.99999	0	0	0.747204	0.157867	SYT4;TTR;SNCG;SNX22;FAU;PBX1
r9 part of nucleus gracilis	6/301	0.80955	0.99999	0	0	0.747204	0.157867	VAT1;TAGLN2;PLIN2;DBI;PRDX6;LSS
r9 part of nucleus of Roller	6/301	0.80955	0.99999	0	0	0.747204	0.157867	TOP2A;ACLY;CXCL10;LGALS1;ANXA5;SNX22
r9 part of the vestibular column	6/301	0.80955	0.99999	0	0	0.747204	0.157867	EBF3;TAGLN2;PLIN2;UBA1;MVD;YWHAZ
r9 portion of the hypoglossal motor nucleus	6/301	0.80955	0.99999	0	0	0.747204	0.157867	ACLY;LGALS1;RPL12;MSN;SNX22;YWHAZ
reticular complex	6/301	0.80955	0.99999	0	0	0.747204	0.157867	RAB31;TTR;RGS16;NR2F1;ID4;HAS2
reticular nucleus	6/301	0.80955	0.99999	0	0	0.747204	0.157867	RAB31;TTR;RGS16;NR2F1;ID4;HAS2
retromammillary area, medial part	6/301	0.80955	0.99999	0	0	0.747204	0.157867	IFITM3;IL1RN;S100A6;S100A4;TIMP1;VIM
retrotrapezoid nucleus	6/301	0.80955	0.99999	0	0	0.747204	0.157867	LGALS1;NRG4;RPL12;MSN;HLA-A;RPS13
rostral periolivary nucleus	6/301	0.80955	0.99999	0	0	0.747204	0.157867	SLC38A1;YWHAQ;NRG4;PABPC4;HSPG2;RPS13
septodiagonal transition area	6/301	0.80955	0.99999	0	0	0.747204	0.157867	VAT1;NRG4;PEG10;NNAT;ZBTB20;RPS21
striatal septum	6/301	0.80955	0.99999	0	0	0.747204	0.157867	SOX2;SYT4;ALCAM;ID4;EBF3;XPR1
sublayer 6a of InsCx	6/301	0.80955	0.99999	0	0	0.747204	0.157867	TMEFF1;ACAP3;FASN;RPS20;ACTN4;IER3
subpallial amygdala	6/301	0.80955	0.99999	0	0	0.747204	0.157867	SOX2;TTR;RPL21;NR2F1;XPR1;PRPH
substantia nigra compacta, isthmic part	6/301	0.80955	0.99999	0	0	0.747204	0.157867	VAT1;YWHAQ;SDC2;WBSCR22;SNCG;LSS
substantia nigra reticulata, m1 part	6/301	0.80955	0.99999	0	0	0.747204	0.157867	IFITM3;NRG4;PABPC4;MMP9;RPS13;GFAP
superficial layers of TG	6/301	0.80955	0.99999	0	0	0.747204	0.157867	IFITM3;MMP14;TNFAIP2;ZBTB20;RPL27;GFAP
superficial stratum of AOB	6/301	0.80955	0.99999	0	0	0.747204	0.157867	IL1RN;RAB31;IL1B;DCX;SOX4;SMARCA4
superficial stratum of CA	6/301	0.80955	0.99999	0	0	0.747204	0.157867	LAPTM5;ISLR2;ZBTB20;PLXNA1;CRMP1;VAMP2
superficial stratum of CoPL	6/301	0.80955	0.99999	0	0	0.747204	0.157867	SPARC;RPL18A;PKIA;LAPTM5;ZBTB20;GFAP
superficial stratum of PSPa	6/301	0.80955	0.99999	0	0	0.747204	0.157867	VAT1;SYT4;FABP5;PEG10;TMBIM6;RPS21
superficial stratum of VTTh	6/301	0.80955	0.99999	0	0	0.747204	0.157867	RPL18A;PKIA;RGS16;RPL11;ZBTB20;FGFBP3
superficial stratum of cerebellar hemisphere	6/301	0.80955	0.99999	0	0	0.747204	0.157867	CADM3;BTG1;PTPRZ1;ZMIZ1;ATN1;VIM
superficial stratum of m1B	6/301	0.80955	0.99999	0	0	0.747204	0.157867	IFITM3;FABP5;SDC2;SNCG;LSS;GFAP
superficial stratum of r10BM	6/301	0.80955	0.99999	0	0	0.747204	0.157867	TOP2A;TRIM28;DPYSL5;ZC3H8;SMARCA4;GFAP
superficial stratum of r1BM	6/301	0.80955	0.99999	0	0	0.747204	0.157867	IL1RN;YWHAQ;SDC2;VIM;AP2M1;GFAP
superficial stratum of r3BI	6/301	0.80955	0.99999	0	0	0.747204	0.157867	NRG4;COX4I1;SPP1;HLA-A;RPS13;GFAP
superficial stratum of r5BL	6/301	0.80955	0.99999	0	0	0.747204	0.157867	LGALS1;NRG4;PABPC4;RPL12;HLA-A;RPS13
superficial stratum of r5Lim	6/301	0.80955	0.99999	0	0	0.747204	0.157867	ACLY;LGALS1;YWHAQ;PRDX1;GPC2;MMP9
superficial stratum of r6BL	6/301	0.80955	0.99999	0	0	0.747204	0.157867	LGALS1;NRG4;RPL12;MSN;HLA-A;RPS13
superficial stratum of r8BL	6/301	0.80955	0.99999	0	0	0.747204	0.157867	TOP2A;TRIM28;TSC22D1;NRG4;EIF4B;GFAP
superficial stratum of r9BL	6/301	0.80955	0.99999	0	0	0.747204	0.157867	TOP2A;TRIM28;NRG4;S100A4;EIF4B;GFAP
superficial stratum of the Fc	6/301	0.80955	0.99999	0	0	0.747204	0.157867	IFITM3;MMP14;IL1B;ITGB2;ZBTB20;LSS
superficial stratum of the PBC	6/301	0.80955	0.99999	0	0	0.747204	0.157867	VAT1;SYT4;SPARC;PRDX1;RPS20;NCAM1
superior periolivary nucleus	6/301	0.80955	0.99999	0	0	0.747204	0.157867	IL1RN;LGALS1;NRG4;SPP1;HLA-A;LCP1
terminal paraventricular area of THyA	6/301	0.80955	0.99999	0	0	0.747204	0.157867	PEG10;RGS16;NNAT;FXYD6;RPS21;VAT1L
ventral subnucleus of MG	6/301	0.80955	0.99999	0	0	0.747204	0.157867	RPS15A;RPL18A;PKIA;RGS16;RPL11;ZBTB20
ventrolateral part of alar m1	6/301	0.80955	0.99999	0	0	0.747204	0.157867	PEG10;PPM1N;SNCG;EBF3;MAPT;PRDX6
ventrolateral part of isA	6/301	0.80955	0.99999	0	0	0.747204	0.157867	PEG10;RPS6;SNCG;EBF3;RPS20;FXYD6
Anteromedial nucleus	7/357	0.835211	0.99999	0	0	0.73405	0.132181	RAB3C;RIMS3;RGS16;ID4;CTNNB1;L1CAM;AP2M1
Taenia tecta	9/448	0.839838	0.99999	0	0	0.751827	0.131229	TOP2A;TMEFF1;TNFAIP2;DCX;HAS2;FLNA;S100A4;SOX4;NEUROG2
Field CA2, stratum lacunosum-moleculare	8/421	0.870108	0.99999	0	0	0.709965	0.0987833	MMP14;ITGB2;LAPTM5;ZBTB20;PLXNA1;ISLR2;CRMP1;VAMP2
mantle zone of DG	12/599	0.870649	0.99999	0	0	0.748187	0.103636	RPS17;RPS15A;RPS7;PKIA;PABPC4;RPL22;RPLP0;ZBTB20;ISLR2;FAU;RPS10;XPR1
superficial stratum of DG	12/601	0.873374	0.99999	0	0	0.745568	0.100944	RPS17;RPS15A;RPS7;PKIA;PABPC4;RPL22;STMN3;ZBTB20;ISLR2;RPS10;RPS13;XPR1
Olivary pretectal nucleus	10/514	0.875173	0.99999	0	0	0.726543	0.0968726	IFITM3;RPS15A;RPL18A;PKIA;ZBTB20;ISLR2;RPL27;VIM;XPR1;PRRC2A
Thalamus	6/334	0.878198	0.99999	0	0	0.670872	0.087135	RAB3C;RIMS3;RGS16;ID4;CTNNB1;L1CAM
Field CA3, stratum lacunosum-moleculare	8/432	0.886953	0.99999	0	0	0.691147	0.0829122	MMP14;IGFBP2;LAPTM5;ZBTB20;PLXNA1;ISLR2;SH3BGRL3;VAMP2
Field CA3, stratum radiatum	6/342	0.891303	0.99999	0	0	0.654625	0.0753282	RPS7;RPL22;LAPTM5;ISLR2;ZBTB20;VAMP2
Field CA1, stratum oriens	6/343	0.892854	0.99999	0	0	0.652648	0.0739661	TMEFF1;ACTR2;ZBTB20;PLXNA1;MLLT3;DUSP6
Peripeduncular nucleus	10/532	0.898934	0.99999	0	0	0.700824	0.0746695	RPL18A;YWHAQ;CCL20;PKIA;RPL11;ZBTB20;CRMP1;HNRNPC;FGFBP3;PJA2
Agranular insular area, dorsal part, layer 1	5/301	0.902063	0.99999	0	0	0.619348	0.0638371	ANKRD34A;ACTR2;LAPTM5;SH3BGRL3;TRIB2
Ammon's horn	5/301	0.902063	0.99999	0	0	0.619348	0.0638371	ISLR2;ZBTB20;PLXNA1;CRMP1;VAMP2
Anterior cingulate area, ventral part, layer 1	5/301	0.902063	0.99999	0	0	0.619348	0.0638371	SQLE;S100A6;KIF21B;DUSP6;NEUROG2
Anterior cingulate area, ventral part, layer 2/3	5/301	0.902063	0.99999	0	0	0.619348	0.0638371	SQLE;PPM1N;S100A6;TNFAIP2;DUSP6
Anterior olfactory nucleus, layer 1	5/301	0.902063	0.99999	0	0	0.619348	0.0638371	IL1RN;LAPTM5;HAS2;SOX11;NEUROG2
Anterolateral visual area, layer 2/3	5/301	0.902063	0.99999	0	0	0.619348	0.0638371	CCL20;PLAUR;TNRC18;HMGCR;DUSP6
Anterolateral visual area, layer 5	5/301	0.902063	0.99999	0	0	0.619348	0.0638371	PLAUR;PTN;HMGCR;RPS27A;TPT1
Anterolateral visual area, layer 6b	5/301	0.902063	0.99999	0	0	0.619348	0.0638371	MYL6;PLAUR;ATP2A2;HMGCR;IER3
Anteromedial visual area	5/301	0.902063	0.99999	0	0	0.619348	0.0638371	ANKRD34A;CDKN1A;TNRC18;HMGCR;DUSP6
Anteromedial visual area, layer 2/3	5/301	0.902063	0.99999	0	0	0.619348	0.0638371	ANKRD34A;CDKN1A;ENC1;TNRC18;DUSP6
Auditory areas	5/301	0.902063	0.99999	0	0	0.619348	0.0638371	IFITM3;YWHAB;FTH1;PPT1;IER3
Bed nuclei of the stria terminalis, posterior division, strial extension	5/301	0.902063	0.99999	0	0	0.619348	0.0638371	CD63;TTR;ZBTB20;VIM;SOX4
Caudoputamen	5/301	0.902063	0.99999	0	0	0.619348	0.0638371	CAP1;CNOT7;SCRN1;TTYH1;ID4
Central lateral nucleus of the thalamus	5/301	0.902063	0.99999	0	0	0.619348	0.0638371	RIMS3;RGS16;CTNNB1;L1CAM;IER3
Cerebellar nuclei	5/301	0.902063	0.99999	0	0	0.619348	0.0638371	BTG1;TTR;ITGB2;S100A4;PBX1
Cerebral cortex	5/301	0.902063	0.99999	0	0	0.619348	0.0638371	IL1RN;ENC1;DCX;HMGCR;DUSP6
Cortical amygdalar area	5/301	0.902063	0.99999	0	0	0.619348	0.0638371	MARCKSL1;TRIM28;PKIA;NR2F1;AP2M1
Cortical amygdalar area, posterior part	5/301	0.902063	0.99999	0	0	0.619348	0.0638371	MARCKSL1;TRIM28;PKIA;NR2F1;AP2M1
Cortical amygdalar area, posterior part, lateral zone, layer 2	5/301	0.902063	0.99999	0	0	0.619348	0.0638371	MARCKSL1;TRIM28;PKIA;SNX22;PRPH
Cortical subplate	5/301	0.902063	0.99999	0	0	0.619348	0.0638371	CNOT7;GNG2;NR2F1;HMGCR;PRPH
Crus 1, granular layer	5/301	0.902063	0.99999	0	0	0.619348	0.0638371	CADM3;BTG1;PTPRZ1;ATN1;VIM
Culmen	5/301	0.902063	0.99999	0	0	0.619348	0.0638371	CADM3;BTG1;PTPRZ1;VIM;SNRNP200
Diagonal band nucleus	5/301	0.902063	0.99999	0	0	0.619348	0.0638371	CXCL10;ALCAM;PABPC4;IL1B;UBA1
Dorsal peduncular area	5/301	0.902063	0.99999	0	0	0.619348	0.0638371	SOX11;S100A4;HLA-A;HSPG2;NEUROG2
Dorsal peduncular area, layer 1	5/301	0.902063	0.99999	0	0	0.619348	0.0638371	TNFAIP2;S100A4;HLA-A;HSPG2;NEUROG2
Endopiriform nucleus, ventral part	5/301	0.902063	0.99999	0	0	0.619348	0.0638371	DNAJA1;PLAUR;LCP1;AP2M1;PRPH
Entorhinal area, lateral part, layer 6a	5/301	0.902063	0.99999	0	0	0.619348	0.0638371	DNAJA1;CDH2;PLIN2;LCP1;FDFT1
Entorhinal area, medial part, dorsal zone, layer 3	5/301	0.902063	0.99999	0	0	0.619348	0.0638371	TMEFF1;CDH2;PLIN2;PTN;FDFT1
Entorhinal area, medial part, dorsal zone, layer 4	5/301	0.902063	0.99999	0	0	0.619348	0.0638371	DNAJA1;CDH2;TRIB2;VAMP2;FDFT1
Entorhinal area, medial part, dorsal zone, layer 5	5/301	0.902063	0.99999	0	0	0.619348	0.0638371	TMEFF1;CDH2;CPE;TRIB2;PRPH
Epithalamus	5/301	0.902063	0.99999	0	0	0.619348	0.0638371	CD63;FADS2;SCRN1;ITGB2;XPR1
Field CA1, stratum pyramidale	5/301	0.902063	0.99999	0	0	0.619348	0.0638371	YWHAB;TRIM2;ZBTB20;PLXNA1;DUSP6
Field CA3, pyramidal layer	5/301	0.902063	0.99999	0	0	0.619348	0.0638371	RPS7;RPL22;ISLR2;ZBTB20;VAMP2
Field CA3, stratum lucidum	5/301	0.902063	0.99999	0	0	0.619348	0.0638371	RPS7;ISLR2;ZBTB20;PLXNA1;VAMP2
Fields of Forel	5/301	0.902063	0.99999	0	0	0.619348	0.0638371	PPP1CB;YWHAQ;PLXNA1;RPL35A;LSS
Frontal pole, layer 1	5/301	0.902063	0.99999	0	0	0.619348	0.0638371	IFITM3;IL1RN;HAS2;SH3BGRL3;SOX4
Geniculate group, ventral thalamus	5/301	0.902063	0.99999	0	0	0.619348	0.0638371	YWHAQ;RGS16;ZBTB20;MVD;LSS
Hemispheric regions	5/301	0.902063	0.99999	0	0	0.619348	0.0638371	CADM3;BTG1;PTPRZ1;ATN1;VIM
Hippocampal region	5/301	0.902063	0.99999	0	0	0.619348	0.0638371	RPS15A;RPL22;ISLR2;ZBTB20;RPS10
Infralimbic area	5/301	0.902063	0.99999	0	0	0.619348	0.0638371	S100A6;S100A4;HLA-A;HSPG2;NEUROG2
Infralimbic area, layer 1	5/301	0.902063	0.99999	0	0	0.619348	0.0638371	DCX;S100A4;HLA-A;HSPG2;NEUROG2
Infralimbic area, layer 6a	5/301	0.902063	0.99999	0	0	0.619348	0.0638371	RPL5;CDKN1A;PPP2R1A;S100A6;DUSP6
Lateral habenula	5/301	0.902063	0.99999	0	0	0.619348	0.0638371	CD63;SCRN1;FABP7;RGS16;XPR1
Lobule II, granular layer	5/301	0.902063	0.99999	0	0	0.619348	0.0638371	BTG1;PTPRZ1;DBI;VIM;SNRNP200
Lobules IV-V	5/301	0.902063	0.99999	0	0	0.619348	0.0638371	CADM3;BTG1;PTPRZ1;VIM;SNRNP200
Lobules IV-V, molecular layer	5/301	0.902063	0.99999	0	0	0.619348	0.0638371	CADM3;BTG1;PTPRZ1;VIM;SNRNP200
Mammillary body	5/301	0.902063	0.99999	0	0	0.619348	0.0638371	CXCL10;RPL12;S100A6;RPL37;TIMP1
Medial amygdalar nucleus, posteroventral part	5/301	0.902063	0.99999	0	0	0.619348	0.0638371	MARCKSL1;IL1B;PEA15;LAPTM5;HDGF
Medial geniculate complex, ventral part	5/301	0.902063	0.99999	0	0	0.619348	0.0638371	RPL18A;PKIA;RGS16;RPL11;FGFBP3
Midbrain raphe nuclei	5/301	0.902063	0.99999	0	0	0.619348	0.0638371	ACLY;IL1RN;SDC2;TIMP1;VIM
Nodulus (X), granular layer	5/301	0.902063	0.99999	0	0	0.619348	0.0638371	CD63;TTR;ITGB2;VIM;HSPG2
Nucleus accumbens	5/301	0.902063	0.99999	0	0	0.619348	0.0638371	CAP1;ALCAM;ID4;DCX;ZBTB20
Nucleus of the optic tract	5/301	0.902063	0.99999	0	0	0.619348	0.0638371	RPL18A;PKIA;LAPTM5;ISLR2;ZBTB20
Orbital area, medial part, layer 2/3	5/301	0.902063	0.99999	0	0	0.619348	0.0638371	IL1RN;S100A6;TNFAIP2;HAS2;NEUROG2
Pallidum, medial region	5/301	0.902063	0.99999	0	0	0.619348	0.0638371	SYT4;CXCL10;ALCAM;PEG10;UBA1
Parabrachial nucleus, lateral division, dorsal lateral part	5/301	0.902063	0.99999	0	0	0.619348	0.0638371	CADM3;SPARC;FABP7;RPS20;NCAM1
Parabrachial nucleus, lateral division, superior lateral part	5/301	0.902063	0.99999	0	0	0.619348	0.0638371	SPARC;RPS18;WBSCR22;RPS20;NCAM1
Paragigantocellular reticular nucleus	5/301	0.902063	0.99999	0	0	0.619348	0.0638371	TOP2A;TRIM28;NRG4;HLA-A;PBX1
Paramedian lobule, granular layer	5/301	0.902063	0.99999	0	0	0.619348	0.0638371	CADM3;BTG1;PTPRZ1;ATN1;VIM
Parasolitary nucleus	5/301	0.902063	0.99999	0	0	0.619348	0.0638371	S100A6;TAGLN2;PLIN2;MVD;YWHAZ
Piriform area, pyramidal layer	5/301	0.902063	0.99999	0	0	0.619348	0.0638371	ACTR2;HAS2;PTN;HMGCR;PRPH
Piriform-amygdalar area	5/301	0.902063	0.99999	0	0	0.619348	0.0638371	MARCKSL1;TRIM28;PKIA;IL1RAPL1;PLIN2
Posterior parietal association areas	5/301	0.902063	0.99999	0	0	0.619348	0.0638371	CDKN1A;TNRC18;HMGCR;HSPG2;DUSP6
Posterolateral visual area	5/301	0.902063	0.99999	0	0	0.619348	0.0638371	LASP1;PLAUR;HMGCR;DUSP6;PRPH
Posterolateral visual area, layer 4	5/301	0.902063	0.99999	0	0	0.619348	0.0638371	LASP1;PLAUR;PTN;HMGCR;DUSP6
Posterolateral visual area, layer 6a	5/301	0.902063	0.99999	0	0	0.619348	0.0638371	CDKN1A;CNOT7;PLAUR;CTNNB1;MVD
Postpiriform transition area, layers 1	5/301	0.902063	0.99999	0	0	0.619348	0.0638371	RPS7;PKIA;NR2F1;PLAUR;FDFT1
Presubiculum, layer 3	5/301	0.902063	0.99999	0	0	0.619348	0.0638371	CAP1;TMEFF1;CNOT7;TRIB2;PRPH
Primary somatosensory area, barrel field	5/301	0.902063	0.99999	0	0	0.619348	0.0638371	LASP1;LRP1;PPT1;PLAUR;PTN
Primary somatosensory area, barrel field, layer 4	5/301	0.902063	0.99999	0	0	0.619348	0.0638371	LASP1;LRP1;TNRC18;PTN;B2M
Primary somatosensory area, lower limb, layer 5	5/301	0.902063	0.99999	0	0	0.619348	0.0638371	NGRN;ATP2A2;SH3BGRL3;PTN;HMGCR
Primary somatosensory area, mouth, layer 5	5/301	0.902063	0.99999	0	0	0.619348	0.0638371	LASP1;CIRBP;PLAUR;PTN;B2M
Primary somatosensory area, mouth, layer 6b	5/301	0.902063	0.99999	0	0	0.619348	0.0638371	TMEFF1;ACAP3;KIF5C;FASN;ACTN4
Primary somatosensory area, nose	5/301	0.902063	0.99999	0	0	0.619348	0.0638371	LASP1;PPT1;PLAUR;ACTN4;PTN
Primary somatosensory area, trunk, layer 4	5/301	0.902063	0.99999	0	0	0.619348	0.0638371	CCL20;ENC1;DCX;TNRC18;PTN
Primary somatosensory area, upper limb, layer 5	5/301	0.902063	0.99999	0	0	0.619348	0.0638371	LASP1;LRP1;PTN;MLLT3;B2M
Primary visual area, layer 1	5/301	0.902063	0.99999	0	0	0.619348	0.0638371	TRIM28;ENC1;TNRC18;DUSP6;MCL1
Purkinje cell layer of CbHCx	5/301	0.902063	0.99999	0	0	0.619348	0.0638371	CADM3;BTG1;PTPRZ1;ATN1;VIM
Purkinje cell layer of CbVCx	5/301	0.902063	0.99999	0	0	0.619348	0.0638371	CADM3;BTG1;PTPRZ1;VIM;SNRNP200
Reticular nucleus of the thalamus	5/301	0.902063	0.99999	0	0	0.619348	0.0638371	RAB31;TTR;RGS16;NR2F1;ID4
Retrosplenial area, lateral agranular part, layer 2/3	5/301	0.902063	0.99999	0	0	0.619348	0.0638371	CDKN1A;TRIM28;TNRC18;DUSP6;SMARCA4
Secondary motor area, layer 6a	5/301	0.902063	0.99999	0	0	0.619348	0.0638371	TMEFF1;SCRN1;MYO5A;ATP2A2;SH3BGRL3
Simple lobule, molecular layer	5/301	0.902063	0.99999	0	0	0.619348	0.0638371	CADM3;BTG1;PTPRZ1;ATN1;VIM
Striatum	5/301	0.902063	0.99999	0	0	0.619348	0.0638371	CAP1;ALCAM;CNOT7;TTYH1;ID4
Striatum dorsal region	5/301	0.902063	0.99999	0	0	0.619348	0.0638371	CAP1;CNOT7;SCRN1;TTYH1;ID4
Subiculum, dorsal part, pyramidal layer	5/301	0.902063	0.99999	0	0	0.619348	0.0638371	TMEFF1;HNRNPK;LRP1;ZBTB20;DUSP6
Submedial nucleus of the thalamus	5/301	0.902063	0.99999	0	0	0.619348	0.0638371	RAB3C;RIMS3;RGS16;L1CAM;AGRN
Subthalamic nucleus	5/301	0.902063	0.99999	0	0	0.619348	0.0638371	GNG2;YWHAQ;WBSCR22;HAS2;TMBIM6
Superior central nucleus raphe	5/301	0.902063	0.99999	0	0	0.619348	0.0638371	ACLY;YWHAQ;SPP1;L1CAM;AP2M1
Superior central nucleus raphe, lateral part	5/301	0.902063	0.99999	0	0	0.619348	0.0638371	YWHAQ;PPM1N;SPP1;L1CAM;AP2M1
Superior colliculus, motor related, deep gray layer	5/301	0.902063	0.99999	0	0	0.619348	0.0638371	RPS8;STXBP1;RPL13;SNCG;AGRN
Superior colliculus, optic layer	5/301	0.902063	0.99999	0	0	0.619348	0.0638371	IFITM3;S100A6;CTNNB1;RPL27;SMARCA4
Superior colliculus, superficial gray layer	5/301	0.902063	0.99999	0	0	0.619348	0.0638371	IFITM3;MMP14;RPL27;UBA1;SMARCA4
Superior colliculus, zonal layer	5/301	0.902063	0.99999	0	0	0.619348	0.0638371	IFITM3;MMP14;S100A6;UBA1;SMARCA4
Superior olivary complex	5/301	0.902063	0.99999	0	0	0.619348	0.0638371	LGALS1;NRG4;SPP1;HLA-A;RPS13
Supplemental somatosensory area, layer 6a	5/301	0.902063	0.99999	0	0	0.619348	0.0638371	GNG2;PPT1;PLAUR;IER3;FDFT1
Supplemental somatosensory area, layer 6b	5/301	0.902063	0.99999	0	0	0.619348	0.0638371	GNG2;PPT1;PLAUR;IER3;FDFT1
Supramammillary nucleus, lateral part	5/301	0.902063	0.99999	0	0	0.619348	0.0638371	CXCL10;FABP5;PABPC4;PPM1N;EBF3
Taenia tecta, dorsal part	5/301	0.902063	0.99999	0	0	0.619348	0.0638371	TMEFF1;TNFAIP2;HAS2;S100A4;NEUROG2
Taenia tecta, ventral part, layer 1	5/301	0.902063	0.99999	0	0	0.619348	0.0638371	CXCL10;FTH1;TNFAIP2;HAS2;NEUROG2
Taenia tecta, ventral part, layer 3	5/301	0.902063	0.99999	0	0	0.619348	0.0638371	TMEFF1;ACTR2;PTN;YBX1;VAMP2
Thalamus, sensory-motor cortex related	5/301	0.902063	0.99999	0	0	0.619348	0.0638371	RIMS3;RGS16;NR2F1;MYO5A;L1CAM
Ventral posterior complex of the thalamus	5/301	0.902063	0.99999	0	0	0.619348	0.0638371	RGS16;NR2F1;MYO5A;L1CAM;CLASP2
Ventral posteromedial nucleus of the thalamus	5/301	0.902063	0.99999	0	0	0.619348	0.0638371	RGS16;NR2F1;MYO5A;L1CAM;CLASP2
Vermal regions	5/301	0.902063	0.99999	0	0	0.619348	0.0638371	CADM3;BTG1;PTPRZ1;VIM;SNRNP200
Visceral area	5/301	0.902063	0.99999	0	0	0.619348	0.0638371	LASP1;PPT1;PLAUR;IER3;FDFT1
Visceral area, layer 6a	5/301	0.902063	0.99999	0	0	0.619348	0.0638371	GNG2;PPT1;PLAUR;IER3;FDFT1
Visual areas	5/301	0.902063	0.99999	0	0	0.619348	0.0638371	CDKN1A;TNRC18;PTN;HMGCR;DUSP6
accessory entopeduncular nucleus (post-migratory)	5/301	0.902063	0.99999	0	0	0.619348	0.0638371	GNG2;YWHAQ;WBSCR22;VAMP2;ATP9A
alar plate of p2 (alar thalamus)	5/301	0.902063	0.99999	0	0	0.619348	0.0638371	RIMS3;RGS16;ID4;CTNNB1;L1CAM
alar plate of p3 (alar prethalamus)	5/301	0.902063	0.99999	0	0	0.619348	0.0638371	RAB31;TTR;RGS16;NR2F1;ID4
amygdalo-striatal transition	5/301	0.902063	0.99999	0	0	0.619348	0.0638371	RPL21;ITGB2;ID4;LSS;XPR1
anterior pretectal nucleus, dorsal superficial part	5/301	0.902063	0.99999	0	0	0.619348	0.0638371	NGRN;RPL18A;RGS16;PEA15;LAPTM5
anterior pretectal nucleus, ventral core part	5/301	0.902063	0.99999	0	0	0.619348	0.0638371	RIMS3;RGS16;KIF5A;WBSCR22;RPL24
basal peduncular hypothalamus	5/301	0.902063	0.99999	0	0	0.619348	0.0638371	MARCKSL1;PEG10;SDC2;TMBIM6;TIMP1
basal plate of m1	5/301	0.902063	0.99999	0	0	0.619348	0.0638371	ACLY;SDC2;PPM1N;SPP1;SNCG
basal reticular formation of p1	5/301	0.902063	0.99999	0	0	0.619348	0.0638371	SDC2;PPM1N;EBF3;LSS;SMARCA4
basomedial amygdaloid nucleus, anterior part	5/301	0.902063	0.99999	0	0	0.619348	0.0638371	MARCKSL1;NR2F1;DCAF7;AP2M1;PRPH
bed nucleus of the stria terminalis, mediocentral division	5/301	0.902063	0.99999	0	0	0.619348	0.0638371	RAB31;TTR;PEG10;ID4;SOX4
caudal interpeduncular nucleus	5/301	0.902063	0.99999	0	0	0.619348	0.0638371	IL1RN;YWHAQ;SPP1;AP2M1;GFAP
cerebellar hemisphere	5/301	0.902063	0.99999	0	0	0.619348	0.0638371	CADM3;BTG1;PTPRZ1;ATN1;VIM
cerebellar vermis	5/301	0.902063	0.99999	0	0	0.619348	0.0638371	CADM3;BTG1;PTPRZ1;VIM;SNRNP200
cingulate cortex	5/301	0.902063	0.99999	0	0	0.619348	0.0638371	TMEFF1;MYO5A;HMGCR;DUSP6;SEPT3
commissural pretectal domain	5/301	0.902063	0.99999	0	0	0.619348	0.0638371	PKIA;LAPTM5;ZBTB20;RPL27;PRDX6
cortex of cerebellar vermis	5/301	0.902063	0.99999	0	0	0.619348	0.0638371	CADM3;BTG1;PTPRZ1;VIM;SNRNP200
deep white layer of SC	5/301	0.902063	0.99999	0	0	0.619348	0.0638371	RPS8;STXBP1;TTC3;PLXNA1;SNCG
diencephalon	5/301	0.902063	0.99999	0	0	0.619348	0.0638371	RAB3C;RIMS3;RGS16;L1CAM;LSS
dorsal juxtacommissural pretectal nucleus	5/301	0.902063	0.99999	0	0	0.619348	0.0638371	IFITM3;FADS2;SDC2;DBI;PRDX6
dorsal paracommissural tectal nucleus, m1 part	5/301	0.902063	0.99999	0	0	0.619348	0.0638371	RPS8;RPL37A;CTNNB1;SNCG;RPS24
dorsal part of CoP	5/301	0.902063	0.99999	0	0	0.619348	0.0638371	RPL18A;PKIA;ZBTB20;RPL27;PRRC2A
dorsal periolivary nucleus	5/301	0.902063	0.99999	0	0	0.619348	0.0638371	LGALS1;YWHAQ;SPP1;HLA-A;LCP1
dorsal subnucleus of MG	5/301	0.902063	0.99999	0	0	0.619348	0.0638371	RPL18A;PKIA;RGS16;ZBTB20;FGFBP3
dorsolateral SC part of the periaqueductal gray	5/301	0.902063	0.99999	0	0	0.619348	0.0638371	RPS8;STXBP1;HMGA1;PLXNA1;SNCG
dorsolateral part of Med	5/301	0.902063	0.99999	0	0	0.619348	0.0638371	BTG1;SOX11;S100A4;PBX1;NEUROG2
frontal cortex	5/301	0.902063	0.99999	0	0	0.619348	0.0638371	TMEFF1;ACAP3;IL1RN;SH3BGRL3;MLLT3
horizontal nucleus of the diagonal band, transitional part	5/301	0.902063	0.99999	0	0	0.619348	0.0638371	CXCL10;NRG4;ZBTB20;TIMP1;SMARCA4
intergeniculate leaflet	5/301	0.902063	0.99999	0	0	0.619348	0.0638371	RPL18A;YWHAQ;RGS16;MVD;LSS
intermediate gray layer of SC	5/301	0.902063	0.99999	0	0	0.619348	0.0638371	S100A6;CTNNB1;RPL27;NEUROG2;SMARCA4
intermediate stratum of CoPD	5/301	0.902063	0.99999	0	0	0.619348	0.0638371	PKIA;PPM1N;ZBTB20;RPL27;PRRC2A
intermediate stratum of DTTh	5/301	0.902063	0.99999	0	0	0.619348	0.0638371	RIMS3;RGS16;ID4;CTNNB1;L1CAM
intermediate stratum of JcPL	5/301	0.902063	0.99999	0	0	0.619348	0.0638371	NGRN;RPL18A;PKIA;RGS16;LAPTM5
intermediate stratum of PcPV	5/301	0.902063	0.99999	0	0	0.619348	0.0638371	RIMS3;RGS16;KIF5A;WBSCR22;RPL24
intermediate stratum of VPrP	5/301	0.902063	0.99999	0	0	0.619348	0.0638371	GNG2;RPL21;HMGCR;SREBF2;VAMP2
intermediate stratum of m1AD	5/301	0.902063	0.99999	0	0	0.619348	0.0638371	FADS2;RPL27A;PKIA;RPL37A;SNCG
intermediate stratum of r10BI	5/301	0.902063	0.99999	0	0	0.619348	0.0638371	TOP2A;LGALS1;HMGA1;S100A4;YWHAZ
intermediate stratum of r10BL	5/301	0.902063	0.99999	0	0	0.619348	0.0638371	TOP2A;NRG4;HMGA1;S100A4;YWHAZ
intermediate stratum of r4Lim	5/301	0.902063	0.99999	0	0	0.619348	0.0638371	LGALS1;PRDX1;WBSCR22;GPC2;MMP9
intermediate stratum of r8BL	5/301	0.902063	0.99999	0	0	0.619348	0.0638371	TOP2A;CXCL10;TRIM28;NRG4;HLA-A
interstitial nucleus of the posterior limb of the anterior commissure	5/301	0.902063	0.99999	0	0	0.619348	0.0638371	RPL21;PEG10;IL1B;ACTG1;PRPH
isthmic alar plate	5/301	0.902063	0.99999	0	0	0.619348	0.0638371	CADM3;BTG1;PTPRZ1;VIM;SNRNP200
isthmic liminal reticular area	5/301	0.902063	0.99999	0	0	0.619348	0.0638371	PCSK1N;RPS18;RPS6;WBSCR22;RPS20
isthmus	5/301	0.902063	0.99999	0	0	0.619348	0.0638371	CADM3;BTG1;PTPRZ1;VIM;SNRNP200
lateral part of JcP	5/301	0.902063	0.99999	0	0	0.619348	0.0638371	NGRN;RPL18A;PKIA;RGS16;LAPTM5
lateral part of MM	5/301	0.902063	0.99999	0	0	0.619348	0.0638371	IL1RN;RPL12;S100A6;ZC3H8;RPL37
lateral part of r10B	5/301	0.902063	0.99999	0	0	0.619348	0.0638371	TOP2A;NRG4;HMGA1;S100A4;YWHAZ
lateral part of r5B	5/301	0.902063	0.99999	0	0	0.619348	0.0638371	LGALS1;NRG4;PABPC4;RPL12;SPP1
lateral part of r9B	5/301	0.902063	0.99999	0	0	0.619348	0.0638371	TOP2A;NRG4;HMGA1;S100A4;GFAP
lateropallial amygdalopiriform area	5/301	0.902063	0.99999	0	0	0.619348	0.0638371	MARCKSL1;YWHAB;NR2F1;LCP1;PRPH
laterostriatal stripe	5/301	0.902063	0.99999	0	0	0.619348	0.0638371	CAP1;CNOT7;ID4;HMGCR;PRPH
layer 1 of AOV cortex	5/301	0.902063	0.99999	0	0	0.619348	0.0638371	IL1RN;TNFAIP2;DCX;HAS2;NEUROG2
layer 1 of OCx	5/301	0.902063	0.99999	0	0	0.619348	0.0638371	TRIM28;ENC1;TNRC18;DUSP6;SMARCA4
layer 2 of AOD cortex	5/301	0.902063	0.99999	0	0	0.619348	0.0638371	IL1RN;DCX;HAS2;SOX11;SOX4
layer 2 of OCx	5/301	0.902063	0.99999	0	0	0.619348	0.0638371	CDKN1A;ENC1;TNRC18;DUSP6;SMARCA4
layer 2 of PrS	5/301	0.902063	0.99999	0	0	0.619348	0.0638371	HNRNPK;PKIA;SNRNP200;B2M;TRIB2
layer 5 of PrS	5/301	0.902063	0.99999	0	0	0.619348	0.0638371	TMEFF1;HNRNPK;RPL22;SNRNP200;TRIB2
layer 6 of ERCx	5/301	0.902063	0.99999	0	0	0.619348	0.0638371	DNAJA1;CDH2;PLIN2;LCP1;FDFT1
liminal part of alar p2	5/301	0.902063	0.99999	0	0	0.619348	0.0638371	RAB3C;RIMS3;RGS16;RPL24;LSS
liminal part of r4 alar plate	5/301	0.902063	0.99999	0	0	0.619348	0.0638371	LGALS1;PRDX1;SPP1;GPC2;MMP9
liminal part of the r5 alar plate	5/301	0.902063	0.99999	0	0	0.619348	0.0638371	LGALS1;PRDX1;SPP1;GPC2;MMP9
m1 (rostral) midbrain tegmentum	5/301	0.902063	0.99999	0	0	0.619348	0.0638371	ACLY;SDC2;PPM1N;SPP1;SNCG
m2 part of paranigral nucleus	5/301	0.902063	0.99999	0	0	0.619348	0.0638371	IFITM3;SDC2;DNER;VIM;GFAP
m2 part of pararubral nucleus	5/301	0.902063	0.99999	0	0	0.619348	0.0638371	IL1B;RPL12;DPYSL3;SNCG;AP2M1
magnocellular interstitial nucleus of the posterior commissure	5/301	0.902063	0.99999	0	0	0.619348	0.0638371	DPYSL2;PPM1N;AGRN;PRDX6;PFDN5
mammillary area	5/301	0.902063	0.99999	0	0	0.619348	0.0638371	CXCL10;IL1RN;S100A6;RPL37;TIMP1
mammillary part of THyB	5/301	0.902063	0.99999	0	0	0.619348	0.0638371	CXCL10;IL1RN;S100A6;RPL37;TIMP1
mantle zone of APal	5/301	0.902063	0.99999	0	0	0.619348	0.0638371	CD63;TTR;DBI;LSS;PRPH
mantle zone of AStr	5/301	0.902063	0.99999	0	0	0.619348	0.0638371	TTR;RPL21;ITGB2;XPR1;PRPH
mantle zone of CCx	5/301	0.902063	0.99999	0	0	0.619348	0.0638371	TMEFF1;MYO5A;HMGCR;DUSP6;SEPT3
mantle zone of CbH	5/301	0.902063	0.99999	0	0	0.619348	0.0638371	CADM3;BTG1;PTPRZ1;ATN1;VIM
mantle zone of CoPD	5/301	0.902063	0.99999	0	0	0.619348	0.0638371	RPL18A;PKIA;ZBTB20;RPL27;PRRC2A
mantle zone of CoPV	5/301	0.902063	0.99999	0	0	0.619348	0.0638371	RPL27A;PPM1N;RPL24;AGRN;PRDX6
mantle zone of FCx	5/301	0.902063	0.99999	0	0	0.619348	0.0638371	TMEFF1;ACAP3;IL1RN;SH3BGRL3;MLLT3
mantle zone of JcPL	5/301	0.902063	0.99999	0	0	0.619348	0.0638371	NGRN;RPL18A;PKIA;RGS16;LAPTM5
mantle zone of Mam	5/301	0.902063	0.99999	0	0	0.619348	0.0638371	CXCL10;IL1RN;S100A6;RPL37;TIMP1
mantle zone of OCx	5/301	0.902063	0.99999	0	0	0.619348	0.0638371	CDKN1A;TNRC18;HMGCR;DUSP6;SMARCA4
mantle zone of PCx	5/301	0.902063	0.99999	0	0	0.619348	0.0638371	ENC1;TNRC18;PTN;MLLT3;DUSP6
mantle zone of PrS	5/301	0.902063	0.99999	0	0	0.619348	0.0638371	TMEFF1;HNRNPK;CNOT7;RPL22;TRIB2
mantle zone of TTe	5/301	0.902063	0.99999	0	0	0.619348	0.0638371	TOP2A;DCX;FLNA;SOX4;NEUROG2
mantle zone of cerebellar vermis	5/301	0.902063	0.99999	0	0	0.619348	0.0638371	CADM3;BTG1;PTPRZ1;VIM;SNRNP200
mantle zone of m1B	5/301	0.902063	0.99999	0	0	0.619348	0.0638371	ACLY;SDC2;PPM1N;SPP1;SNCG
mantle zone of m2B	5/301	0.902063	0.99999	0	0	0.619348	0.0638371	SDC2;RPL12;DPYSL3;SNCG;EBF3
mantle zone of r10BL	5/301	0.902063	0.99999	0	0	0.619348	0.0638371	TOP2A;NRG4;HMGA1;S100A4;YWHAZ
mantle zone of r10BM	5/301	0.902063	0.99999	0	0	0.619348	0.0638371	TOP2A;LGALS1;TRIM28;SNX22;GFAP
mantle zone of r10Tr	5/301	0.902063	0.99999	0	0	0.619348	0.0638371	EBF3;TAGLN2;PLIN2;SNX22;YWHAZ
mantle zone of r11Tr	5/301	0.902063	0.99999	0	0	0.619348	0.0638371	ACAP3;MMP14;ZC3H8;TNRC18;ATP9A
mantle zone of r1Ve	5/301	0.902063	0.99999	0	0	0.619348	0.0638371	LGALS1;TTR;SPP1;NEUROG2;WLS
mantle zone of r3BM	5/301	0.902063	0.99999	0	0	0.619348	0.0638371	COX4I1;ANXA5;SPP1;HMGA1;NEFL
mantle zone of r4Lim	5/301	0.902063	0.99999	0	0	0.619348	0.0638371	LGALS1;PRDX1;SPP1;GPC2;MMP9
mantle zone of r5BL	5/301	0.902063	0.99999	0	0	0.619348	0.0638371	LGALS1;NRG4;PABPC4;RPL12;SPP1
mantle zone of r5Lim	5/301	0.902063	0.99999	0	0	0.619348	0.0638371	LGALS1;PRDX1;SPP1;GPC2;MMP9
mantle zone of r6Co	5/301	0.902063	0.99999	0	0	0.619348	0.0638371	FADS2;MMP14;CCL20;LCP1;WLS
mantle zone of r9BL	5/301	0.902063	0.99999	0	0	0.619348	0.0638371	TOP2A;NRG4;HMGA1;S100A4;GFAP
medial amygdala, posteroventral part	5/301	0.902063	0.99999	0	0	0.619348	0.0638371	MARCKSL1;TRIM28;PKIA;LAPTM5;AP2M1
medial pallium (hippocampal allocortex)	5/301	0.902063	0.99999	0	0	0.619348	0.0638371	RPL22;LAPTM5;ISLR2;ZBTB20;RPS10
medial part of r10B	5/301	0.902063	0.99999	0	0	0.619348	0.0638371	TOP2A;LGALS1;TRIM28;SNX22;GFAP
medial part of r3B	5/301	0.902063	0.99999	0	0	0.619348	0.0638371	COX4I1;ANXA5;SPP1;HMGA1;NEFL
medial tuberal nucleus	5/301	0.902063	0.99999	0	0	0.619348	0.0638371	VAT1;TRIM28;PABPC4;RPL12;ZC3H8
molecular layer of CbVCx	5/301	0.902063	0.99999	0	0	0.619348	0.0638371	CADM3;BTG1;PTPRZ1;VIM;SNRNP200
nucleus subcoeruleus, r1 part	5/301	0.902063	0.99999	0	0	0.619348	0.0638371	TMEFF1;ACLY;FABP5;SNCG;FDFT1
occipital cortex	5/301	0.902063	0.99999	0	0	0.619348	0.0638371	CDKN1A;TNRC18;HMGCR;DUSP6;SMARCA4
optic fiber layer of SC	5/301	0.902063	0.99999	0	0	0.619348	0.0638371	S100A6;CTNNB1;RPL27;NEUROG2;SMARCA4
p1 part of the pararubral nucleus	5/301	0.902063	0.99999	0	0	0.619348	0.0638371	IFITM3;PPM1N;SPP1;SNCG;LSS
p1Lim part of periaqueductal gray	5/301	0.902063	0.99999	0	0	0.619348	0.0638371	COX4I1;PPM1N;AGRN;PGM2L1;VAMP2
pallidal amygdala	5/301	0.902063	0.99999	0	0	0.619348	0.0638371	CD63;TTR;DBI;LSS;PRPH
pararubral nucleus, m1 part	5/301	0.902063	0.99999	0	0	0.619348	0.0638371	APC2;IL1B;SPP1;SNCG;AP2M1
paraterete nucleus	5/301	0.902063	0.99999	0	0	0.619348	0.0638371	PCSK1N;MARCKSL1;FABP5;PABPC4;ZC3H8
parietal cortex	5/301	0.902063	0.99999	0	0	0.619348	0.0638371	ENC1;TNRC18;PTN;MLLT3;DUSP6
perirhinal-ectorhinal cortex	5/301	0.902063	0.99999	0	0	0.619348	0.0638371	DNAJA1;PLAUR;HMGCR;RPS27A;FDFT1
periventricular stratum of AStr	5/301	0.902063	0.99999	0	0	0.619348	0.0638371	RPL21;ITGB2;ID4;LSS;XPR1
periventricular stratum of Dg	5/301	0.902063	0.99999	0	0	0.619348	0.0638371	RAB31;TTR;PEG10;ID4;SOX4
periventricular stratum of SC	5/301	0.902063	0.99999	0	0	0.619348	0.0638371	RPS8;STXBP1;TTC3;PLXNA1;SNCG
periventricular stratum of p1Lim	5/301	0.902063	0.99999	0	0	0.619348	0.0638371	COX4I1;PPM1N;AGRN;PGM2L1;VAMP2
periventricular stratum of r1BM	5/301	0.902063	0.99999	0	0	0.619348	0.0638371	SOX2;RPS17;RPL37A;MVD;FDFT1
periventricular stratum of r3Lim	5/301	0.902063	0.99999	0	0	0.619348	0.0638371	DPYSL5;IGFBP2;SNCG;PLIN2;WLS
periventricular stratum of r6BM	5/301	0.902063	0.99999	0	0	0.619348	0.0638371	SYT4;TTR;SNCG;SNX22;PBX1
periventricular stratum of r7Co	5/301	0.902063	0.99999	0	0	0.619348	0.0638371	FADS2;MMP14;CCL20;LCP1;WLS
periventricular stratum of r8BM	5/301	0.902063	0.99999	0	0	0.619348	0.0638371	ACLY;CXCL10;LGALS1;SNX22;FAU
periventricular stratum of r8Tr	5/301	0.902063	0.99999	0	0	0.619348	0.0638371	FASN;TAGLN2;PLIN2;SNX22;YWHAZ
periventricular stratum of r9Ve	5/301	0.902063	0.99999	0	0	0.619348	0.0638371	VAT1;HMGA1;PLIN2;MVD;YWHAZ
posteromedial cortical amygdaloid area	5/301	0.902063	0.99999	0	0	0.619348	0.0638371	MARCKSL1;TSC22D1;RPS7;PKIA;NR2F1
prethalamus	5/301	0.902063	0.99999	0	0	0.619348	0.0638371	RAB31;TTR;RGS16;NR2F1;ID4
prosomere 1	5/301	0.902063	0.99999	0	0	0.619348	0.0638371	SDC2;RGS16;PPM1N;LAPTM5;LSS
r1 alar plate	5/301	0.902063	0.99999	0	0	0.619348	0.0638371	CADM3;BTG1;PTPRZ1;ATN1;VIM
r1 part of vestibular sensory column	5/301	0.902063	0.99999	0	0	0.619348	0.0638371	LGALS1;TTR;SPP1;NEUROG2;WLS
r10 part of basointermediate reticular formation	5/301	0.902063	0.99999	0	0	0.619348	0.0638371	TOP2A;SLC38A1;HMGA1;S100A4;YWHAZ
r10 part of basolateral reticular formation	5/301	0.902063	0.99999	0	0	0.619348	0.0638371	TOP2A;NRG4;HMGA1;S100A4;YWHAZ
r10 part of the trigeminal column	5/301	0.902063	0.99999	0	0	0.619348	0.0638371	EBF3;TAGLN2;PLIN2;SNX22;YWHAZ
r11 part of spinal trigeminal nucleus, caudal part	5/301	0.902063	0.99999	0	0	0.619348	0.0638371	ACAP3;MMP14;ZC3H8;TNRC18;ATP9A
r11 part of the trigeminal column	5/301	0.902063	0.99999	0	0	0.619348	0.0638371	ACAP3;MMP14;ZC3H8;TNRC18;ATP9A
r2 part of lateral pontine nuclei	5/301	0.902063	0.99999	0	0	0.619348	0.0638371	NRG4;SPP1;HLA-A;HSPG2;RPS13
r3 liminal central gray	5/301	0.902063	0.99999	0	0	0.619348	0.0638371	DPYSL5;IGFBP2;SNCG;PLIN2;WLS
r3 part of spinal trigeminal sensory column, oral part	5/301	0.902063	0.99999	0	0	0.619348	0.0638371	ACAP3;YWHAQ;HNRNPA2B1;EBF3;LSS
r3 part of ventral lateral lemniscal nucleus	5/301	0.902063	0.99999	0	0	0.619348	0.0638371	TOP2A;NRG4;WBSCR22;SPP1;GFAP
r4 part of ventral parvicellular reticular formation	5/301	0.902063	0.99999	0	0	0.619348	0.0638371	LGALS1;PRDX1;WBSCR22;GPC2;MMP9
r6 part of nucleus prepositus	5/301	0.902063	0.99999	0	0	0.619348	0.0638371	SYT4;TTR;SNCG;SNX22;PBX1
r6 part of the cochlear column	5/301	0.902063	0.99999	0	0	0.619348	0.0638371	FADS2;MMP14;CCL20;LCP1;WLS
r7 part of the dorsal cochlear nucleus	5/301	0.902063	0.99999	0	0	0.619348	0.0638371	FADS2;MMP14;CCL20;LCP1;WLS
r7 part of trigeminal transition zone	5/301	0.902063	0.99999	0	0	0.619348	0.0638371	LGALS1;CAPRIN1;TAGLN2;LSS;EIF4B
r8 (gustatory) part of solitary complex	5/301	0.902063	0.99999	0	0	0.619348	0.0638371	FASN;TAGLN2;PLIN2;SNX22;YWHAZ
r8 part of basolateral reticular formation	5/301	0.902063	0.99999	0	0	0.619348	0.0638371	TOP2A;CXCL10;TRIM28;NRG4;HLA-A
r8 part of linear nucleus	5/301	0.902063	0.99999	0	0	0.619348	0.0638371	TOP2A;CXCL10;CAPRIN1;HLA-A;EIF4B
r9 part of parvocellular medial vestibular nucleus	5/301	0.902063	0.99999	0	0	0.619348	0.0638371	VAT1;HMGA1;PLIN2;MVD;YWHAZ
r9 portion of ambiguous motor nucleus (postmigratory)	5/301	0.902063	0.99999	0	0	0.619348	0.0638371	TOP2A;SYT4;S100A4;YWHAZ;EIF4B
reticular formation of JcPL	5/301	0.902063	0.99999	0	0	0.619348	0.0638371	NGRN;RPL18A;PKIA;RGS16;LAPTM5
reticular formation of basal m2	5/301	0.902063	0.99999	0	0	0.619348	0.0638371	RPL12;WBSCR22;PLXNA1;EBF3;YWHAZ
rhombomere 10	5/301	0.902063	0.99999	0	0	0.619348	0.0638371	TOP2A;LGALS1;MSN;SNX22;GFAP
rhombomere 11	5/301	0.902063	0.99999	0	0	0.619348	0.0638371	TOP2A;HNRNPA2B1;ZC3H8;TIMP1;GFAP
rostral interpeduncular nucleus	5/301	0.902063	0.99999	0	0	0.619348	0.0638371	IL1RN;YWHAQ;SDC2;VIM;GFAP
shell part of the anterobasal nucleus	5/301	0.902063	0.99999	0	0	0.619348	0.0638371	IFITM3;VAT1;TRIM28;PEG10;ZC3H8
striatal amygdala	5/301	0.902063	0.99999	0	0	0.619348	0.0638371	TTR;RPL21;ITGB2;XPR1;PRPH
sublayer 6b of CCx	5/301	0.902063	0.99999	0	0	0.619348	0.0638371	TOP2A;GNB1;MYO5A;HMGCR;SEPT3
subpallium	5/301	0.902063	0.99999	0	0	0.619348	0.0638371	CAP1;ALCAM;CNOT7;TTYH1;ID4
subthalamic nucleus (migrated)	5/301	0.902063	0.99999	0	0	0.619348	0.0638371	RAB31;GNG2;FABP5;TMBIM6;GFAP
superficial stratum of CCx (cortical plate/marginal zone)	5/301	0.902063	0.99999	0	0	0.619348	0.0638371	TMEFF1;MYO5A;HMGCR;DUSP6;SEPT3
superficial stratum of FCx (cortical plate/marginal zone)	5/301	0.902063	0.99999	0	0	0.619348	0.0638371	TMEFF1;ACAP3;IL1RN;SH3BGRL3;MLLT3
superficial stratum of OCx (cortical plate/marginal zone)	5/301	0.902063	0.99999	0	0	0.619348	0.0638371	CDKN1A;TNRC18;HMGCR;DUSP6;SMARCA4
superficial stratum of PCx (cortical plate/marginal zone)	5/301	0.902063	0.99999	0	0	0.619348	0.0638371	ENC1;TNRC18;PTN;MLLT3;DUSP6
superficial stratum of PHyB-V	5/301	0.902063	0.99999	0	0	0.619348	0.0638371	PCSK1N;MARCKSL1;FABP5;PABPC4;ZC3H8
superficial stratum of PcPL	5/301	0.902063	0.99999	0	0	0.619348	0.0638371	NGRN;RPL18A;RGS16;PEA15;LAPTM5
superficial stratum of PrS (cortical plate/marginal zone)	5/301	0.902063	0.99999	0	0	0.619348	0.0638371	TMEFF1;HNRNPK;CNOT7;RPL22;TRIB2
superficial stratum of RtC	5/301	0.902063	0.99999	0	0	0.619348	0.0638371	YWHAQ;ZBTB20;MSN;MVD;LSS
superficial stratum of SeDg	5/301	0.902063	0.99999	0	0	0.619348	0.0638371	CXCL10;NRG4;ZBTB20;TIMP1;SMARCA4
superficial stratum of THyB-I	5/301	0.902063	0.99999	0	0	0.619348	0.0638371	VAT1;TRIM28;PABPC4;RPL12;ZC3H8
superficial stratum of VPrP	5/301	0.902063	0.99999	0	0	0.619348	0.0638371	ACTR2;HAS2;PTN;HMGCR;AP2M1
superficial stratum of cerebellar vermis	5/301	0.902063	0.99999	0	0	0.619348	0.0638371	CADM3;BTG1;PTPRZ1;VIM;SNRNP200
superficial stratum of m1AD	5/301	0.902063	0.99999	0	0	0.619348	0.0638371	RPS8;RPL37A;CTNNB1;SNCG;RPS24
superficial stratum of p1B	5/301	0.902063	0.99999	0	0	0.619348	0.0638371	SDC2;PABPC4;TIMP1;VIM;GFAP
superficial stratum of r11Tr	5/301	0.902063	0.99999	0	0	0.619348	0.0638371	ACAP3;MMP14;ZC3H8;TNRC18;ATP9A
superficial stratum of r2BI	5/301	0.902063	0.99999	0	0	0.619348	0.0638371	NRG4;SPP1;HLA-A;HSPG2;RPS13
superficial stratum of r3BL	5/301	0.902063	0.99999	0	0	0.619348	0.0638371	TOP2A;NRG4;WBSCR22;SPP1;GFAP
superficial stratum of r3Tr	5/301	0.902063	0.99999	0	0	0.619348	0.0638371	ACAP3;YWHAQ;HNRNPA2B1;EBF3;LSS
superficial stratum of r4BL	5/301	0.902063	0.99999	0	0	0.619348	0.0638371	NRG4;WBSCR22;SPP1;RPL37;YWHAZ
superficial stratum of r9Lim	5/301	0.902063	0.99999	0	0	0.619348	0.0638371	TOP2A;SYT4;S100A4;YWHAZ;EIF4B
temporal muscle trigeminal motor cell group	5/301	0.902063	0.99999	0	0	0.619348	0.0638371	LGALS1;MSN;MVD;MMP9;AP2M1
ventral entopeduncular nucleus	5/301	0.902063	0.99999	0	0	0.619348	0.0638371	VAT1;SYT4;PEG10;TMBIM6;RPS21
ventral nuclei	5/301	0.902063	0.99999	0	0	0.619348	0.0638371	RIMS3;RGS16;NR2F1;MYO5A;L1CAM
ventral paracommissural tectal nucleus, m1 part	5/301	0.902063	0.99999	0	0	0.619348	0.0638371	FADS2;RPL27A;PKIA;RPL37A;SNCG
ventral part of CoP	5/301	0.902063	0.99999	0	0	0.619348	0.0638371	RPL27A;PPM1N;RPL24;AGRN;PRDX6
ventral posteromedial nucleus	5/301	0.902063	0.99999	0	0	0.619348	0.0638371	IL1B;RGS16;NR2F1;MYO5A;L1CAM
ventrolateral periolivary nucleus	5/301	0.902063	0.99999	0	0	0.619348	0.0638371	LGALS1;NRG4;RPL12;GPC2;GFAP
zonal layer of SC	5/301	0.902063	0.99999	0	0	0.619348	0.0638371	IFITM3;MMP14;S100A6;UBA1;SMARCA4
Nucleus incertus	7/398	0.904061	0.99999	0	0	0.655669	0.0661297	SYT4;IGFBP2;HNRNPA2B1;SNCG;PLIN2;YBX1;VAT1L
Accessory olfactory bulb	6/379	0.937377	0.99999	0	0	0.588549	0.0380612	IL1RN;RAB31;IL1B;DCX;SOX4;SMARCA4
Fasciola cinerea	7/435	0.943498	0.99999	0	0	0.597826	0.0347701	IFITM3;FADS2;MMP14;IL1B;ITGB2;ZBTB20;LSS
Field CA1	5/344	0.951262	0.99999	0	0	0.539575	0.0269602	YWHAB;ZBTB20;PLXNA1;CRMP1;DUSP6
Field CA3, stratum oriens	5/349	0.955211	0.99999	0	0	0.531593	0.0243593	IGFBP2;LAPTM5;ISLR2;ZBTB20;PLXNA1
Central amygdalar nucleus, lateral part	6/401	0.95568	0.99999	0	0	0.555129	0.0251654	TTR;RPL21;DBI;LSS;XPR1;PRPH
AOB, mitral cell layer	4/301	0.959058	0.99999	0	0	0.492842	0.0206028	IL1RN;IL1B;DCX;SOX4
AOB, outer plexiform layer	4/301	0.959058	0.99999	0	0	0.492842	0.0206028	IL1RN;IL1B;DCX;SOX4
Accessory olfactory bulb, mitral layer	4/301	0.959058	0.99999	0	0	0.492842	0.0206028	IL1RN;IL1B;DCX;SOX4
Agranular insular area, posterior part, layer 6a	4/301	0.959058	0.99999	0	0	0.492842	0.0206028	GNG2;PLAUR;ISLR2;FDFT1
Anterior cingulate area	4/301	0.959058	0.99999	0	0	0.492842	0.0206028	SQLE;S100A6;KIF21B;DUSP6
Anterior cingulate area, dorsal part, layer 2/3	4/301	0.959058	0.99999	0	0	0.492842	0.0206028	IL1RN;S100A6;KIF21B;SMARCA4
Anterior cingulate area, ventral part	4/301	0.959058	0.99999	0	0	0.492842	0.0206028	SQLE;S100A6;DUSP6;NEUROG2
Anterior cingulate area, ventral part, layer 5	4/301	0.959058	0.99999	0	0	0.492842	0.0206028	SQLE;FLNA;DUSP6;SREBF2
Anterior olfactory nucleus	4/301	0.959058	0.99999	0	0	0.492842	0.0206028	IL1RN;DCX;HAS2;SOX11
Anterior olfactory nucleus, lateral part	4/301	0.959058	0.99999	0	0	0.492842	0.0206028	IL1RN;DCX;HAS2;SOX4
Basolateral amygdalar nucleus, anterior part	4/301	0.959058	0.99999	0	0	0.492842	0.0206028	GNG2;NR2F1;PLAUR;AP2M1
Basolateral amygdalar nucleus, posterior part	4/301	0.959058	0.99999	0	0	0.492842	0.0206028	DNAJA1;NR2F1;PLAUR;AP2M1
Bed nuclei of the stria terminalis, anterior division, anterolateral area	4/301	0.959058	0.99999	0	0	0.492842	0.0206028	PEG10;NNAT;S100A6;ZBTB20
Bed nuclei of the stria terminalis, anterior division, juxtacapsular nucleus	4/301	0.959058	0.99999	0	0	0.492842	0.0206028	TTYH1;PEG10;ZBTB20;ZMPSTE24
Cerebral nuclei	4/301	0.959058	0.99999	0	0	0.492842	0.0206028	CAP1;ALCAM;TTYH1;ID4
Cochlear nucleus, subpedunclular granular region	4/301	0.959058	0.99999	0	0	0.492842	0.0206028	BTG1;IGFBP2;NEUROG2;WLS
Cortical amygdalar area, anterior part	4/301	0.959058	0.99999	0	0	0.492842	0.0206028	MARCKSL1;TRIM28;AP2M1;PRPH
Cortical amygdalar area, posterior part, lateral zone	4/301	0.959058	0.99999	0	0	0.492842	0.0206028	MARCKSL1;TRIM28;PKIA;PRPH
Cortical amygdalar area, posterior part, medial zone, layer 2	4/301	0.959058	0.99999	0	0	0.492842	0.0206028	MARCKSL1;TRIM28;PKIA;PGM2L1
Cortical plate	4/301	0.959058	0.99999	0	0	0.492842	0.0206028	IL1RN;ENC1;DCX;DUSP6
Cuneate nucleus	4/301	0.959058	0.99999	0	0	0.492842	0.0206028	S100A6;PLIN2;MVD;YWHAZ
Dorsal cochlear nucleus	4/301	0.959058	0.99999	0	0	0.492842	0.0206028	MMP14;TTR;CCL20;LCP1
Dorsal column nuclei	4/301	0.959058	0.99999	0	0	0.492842	0.0206028	S100A6;PLIN2;MVD;YWHAZ
Dorsal part of the lateral geniculate complex	4/301	0.959058	0.99999	0	0	0.492842	0.0206028	RGS16;HNRNPC;L1CAM;CLASP2
Dorsal peduncular area, layer 5	4/301	0.959058	0.99999	0	0	0.492842	0.0206028	TOP2A;YWHAB;FLNA;SOX11
Entorhinal area, medial part, dorsal zone, layer 6	4/301	0.959058	0.99999	0	0	0.492842	0.0206028	CDH2;CPE;TRIB2;FDFT1
Entorhinal area, medial part, ventral zone, layer 1	4/301	0.959058	0.99999	0	0	0.492842	0.0206028	SYT4;TRIM28;PKIA;ZC3H8
Field CA1, pyramidal layer	4/301	0.959058	0.99999	0	0	0.492842	0.0206028	TRIM2;ZBTB20;PLXNA1;DUSP6
Field CA2, pyramidal layer	4/301	0.959058	0.99999	0	0	0.492842	0.0206028	MMP14;ITGB2;ZBTB20;PLXNA1
Flocculus, granular layer	4/301	0.959058	0.99999	0	0	0.492842	0.0206028	BTG1;ITGB2;STMN2;ATN1
Flocculus, molecular layer	4/301	0.959058	0.99999	0	0	0.492842	0.0206028	BTG1;ITGB2;ATN1;LCP1
Folium-tuber vermis (VII)	4/301	0.959058	0.99999	0	0	0.492842	0.0206028	CADM3;BTG1;PTPRZ1;VIM
Folium-tuber vermis (VII), granular layer	4/301	0.959058	0.99999	0	0	0.492842	0.0206028	CADM3;BTG1;PTPRZ1;VIM
Folium-tuber vermis (VII), molecular layer	4/301	0.959058	0.99999	0	0	0.492842	0.0206028	CADM3;BTG1;PTPRZ1;VIM
Fundus of striatum	4/301	0.959058	0.99999	0	0	0.492842	0.0206028	ACAP3;RPL21;IL1B;PRPH
Globus pallidus, external segment	4/301	0.959058	0.99999	0	0	0.492842	0.0206028	RAB31;CCL20;LSS;PBX1
Globus pallidus, internal segment	4/301	0.959058	0.99999	0	0	0.492842	0.0206028	RAB31;YWHAQ;CCL20;PABPC4
Gustatory areas	4/301	0.959058	0.99999	0	0	0.492842	0.0206028	ACTR2;PLAUR;ACTN4;PRPH
Hippocampal formation	4/301	0.959058	0.99999	0	0	0.492842	0.0206028	RPL22;ISLR2;ZBTB20;RPS10
Infralimbic area, layer 2	4/301	0.959058	0.99999	0	0	0.492842	0.0206028	RAB31;TNFAIP2;SOX11;NEUROG2
Intergeniculate leaflet of the lateral geniculate complex	4/301	0.959058	0.99999	0	0	0.492842	0.0206028	YWHAQ;RGS16;L1CAM;LSS
Interposed nucleus	4/301	0.959058	0.99999	0	0	0.492842	0.0206028	TTR;ITGB2;DBI;PBX1
Interstitial nucleus of Cajal	4/301	0.959058	0.99999	0	0	0.492842	0.0206028	PPM1N;EBF3;AGRN;LSS
Isocortex	4/301	0.959058	0.99999	0	0	0.492842	0.0206028	ENC1;KIF21B;HMGCR;DUSP6
Lateral dorsal nucleus of thalamus	4/301	0.959058	0.99999	0	0	0.492842	0.0206028	RGS16;IGFBP2;ID4;MLLT3
Lateral group of the dorsal thalamus	4/301	0.959058	0.99999	0	0	0.492842	0.0206028	NGRN;RIMS3;RGS16;L1CAM
Lateral terminal nucleus of the accessory optic tract	4/301	0.959058	0.99999	0	0	0.492842	0.0206028	YWHAQ;CCL20;RPL11;DCX
Linear nucleus of the medulla	4/301	0.959058	0.99999	0	0	0.492842	0.0206028	CXCL10;SOX11;EIF4B;ZMPSTE24
Lobule II	4/301	0.959058	0.99999	0	0	0.492842	0.0206028	BTG1;PTPRZ1;DBI;VIM
Lobule II, molecular layer	4/301	0.959058	0.99999	0	0	0.492842	0.0206028	BTG1;PTPRZ1;DBI;VIM
Lobule III	4/301	0.959058	0.99999	0	0	0.492842	0.0206028	BTG1;PTPRZ1;VIM;SEPT2
Lobule III, granular layer	4/301	0.959058	0.99999	0	0	0.492842	0.0206028	BTG1;PTPRZ1;VIM;SEPT2
Magnocellular nucleus	4/301	0.959058	0.99999	0	0	0.492842	0.0206028	RPL18A;PABPC4;STMN3;AP2M1
Medial amygdalar nucleus, anteroventral part	4/301	0.959058	0.99999	0	0	0.492842	0.0206028	IFITM3;MARCKSL1;TRIM28;LAPTM5
Medial geniculate complex, dorsal part	4/301	0.959058	0.99999	0	0	0.492842	0.0206028	RPL18A;RGS16;ZBTB20;FGFBP3
Medial vestibular nucleus	4/301	0.959058	0.99999	0	0	0.492842	0.0206028	RPS17;TTR;IGFBP2;ITGB2
Midbrain reticular nucleus, retrorubral area	4/301	0.959058	0.99999	0	0	0.492842	0.0206028	WBSCR22;SNCG;RPS20;AP2M1
Midbrain, motor related	4/301	0.959058	0.99999	0	0	0.492842	0.0206028	RPS8;PPM1N;SNCG;EBF3
Mus musculus	4/301	0.959058	0.99999	0	0	0.492842	0.0206028	BTG1;FABP7;ENC1;DUSP6
Nodulus (X)	4/301	0.959058	0.99999	0	0	0.492842	0.0206028	CD63;TTR;ITGB2;VIM
Nucleus of the trapezoid body	4/301	0.959058	0.99999	0	0	0.492842	0.0206028	TMEFF1;TNFAIP2;HSPG2;GFAP
Orbital area	4/301	0.959058	0.99999	0	0	0.492842	0.0206028	IL1RN;S100A6;HAS2;NEUROG2
Orbital area, lateral part	4/301	0.959058	0.99999	0	0	0.492842	0.0206028	IL1RN;IL1B;LAPTM5;NEUROG2
Orbital area, lateral part, layer 1	4/301	0.959058	0.99999	0	0	0.492842	0.0206028	IL1RN;IL1B;LAPTM5;NEUROG2
Orbital area, lateral part, layer 2/3	4/301	0.959058	0.99999	0	0	0.492842	0.0206028	IL1RN;IL1B;LAPTM5;NEUROG2
Orbital area, medial part, layer 2	4/301	0.959058	0.99999	0	0	0.492842	0.0206028	IL1RN;S100A6;TNFAIP2;NEUROG2
Pallidum, dorsal region	4/301	0.959058	0.99999	0	0	0.492842	0.0206028	RAB31;CCL20;LSS;PBX1
Paragigantocellular reticular nucleus, dorsal part	4/301	0.959058	0.99999	0	0	0.492842	0.0206028	SYT4;SPP1;SNX22;PBX1
Parapyramidal nucleus	4/301	0.959058	0.99999	0	0	0.492842	0.0206028	NRG4;HNRNPA2B1;RPS13;PBX1
Parasubiculum, layer 3	4/301	0.959058	0.99999	0	0	0.492842	0.0206028	TMEFF1;CDH2;TRIB2;PRPH
Piriform area	4/301	0.959058	0.99999	0	0	0.492842	0.0206028	ACTR2;PTN;HMGCR;PRPH
Piriform area, polymorph layer	4/301	0.959058	0.99999	0	0	0.492842	0.0206028	ACTR2;PTN;HMGCR;PRPH
Piriform-amygdalar area, pyramidal layer	4/301	0.959058	0.99999	0	0	0.492842	0.0206028	MARCKSL1;PKIA;IL1RAPL1;PRPH
Posterior complex of the thalamus	4/301	0.959058	0.99999	0	0	0.492842	0.0206028	RIMS3;RGS16;L1CAM;IER3
Posterior limiting nucleus of the thalamus	4/301	0.959058	0.99999	0	0	0.492842	0.0206028	RIMS3;RPL21;RGS16;HAS2
Posterior parietal association areas, layer 1	4/301	0.959058	0.99999	0	0	0.492842	0.0206028	CDKN1A;ENC1;UBA1;DUSP6
Posterior pretectal nucleus	4/301	0.959058	0.99999	0	0	0.492842	0.0206028	PPM1N;ZBTB20;RPL27;PRRC2A
Posterolateral visual area, layer 2/3	4/301	0.959058	0.99999	0	0	0.492842	0.0206028	LASP1;PLAUR;PTN;DUSP6
Postsubiculum	4/301	0.959058	0.99999	0	0	0.492842	0.0206028	IFITM3;S100A6;UBA1;TRIB2
Primary somatosensory area	4/301	0.959058	0.99999	0	0	0.492842	0.0206028	CNOT7;LRP1;PTN;MLLT3
Primary somatosensory area, barrel field, layer 5	4/301	0.959058	0.99999	0	0	0.492842	0.0206028	LASP1;LRP1;PPT1;PTN
Primary somatosensory area, lower limb, layer 2/3	4/301	0.959058	0.99999	0	0	0.492842	0.0206028	TRIM28;ENC1;RPL27;HMGCR
Primary somatosensory area, lower limb, layer 4	4/301	0.959058	0.99999	0	0	0.492842	0.0206028	CCL20;RPL27;TNRC18;HMGCR
Primary somatosensory area, mouth	4/301	0.959058	0.99999	0	0	0.492842	0.0206028	CNOT7;PLAUR;ACTN4;MLLT3
Primary somatosensory area, nose, layer 6a	4/301	0.959058	0.99999	0	0	0.492842	0.0206028	LASP1;PPT1;PLAUR;ACTN4
Primary somatosensory area, unassigned, layer 4	4/301	0.959058	0.99999	0	0	0.492842	0.0206028	CIRBP;PLAUR;TNRC18;PTN
Primary somatosensory area, unassigned, layer 6a	4/301	0.959058	0.99999	0	0	0.492842	0.0206028	TMEFF1;ACAP3;LASP1;MLLT3
Primary somatosensory area, upper limb, layer 2/3	4/301	0.959058	0.99999	0	0	0.492842	0.0206028	ENC1;TNRC18;HLA-A;MLLT3
Primary somatosensory area, upper limb, layer 4	4/301	0.959058	0.99999	0	0	0.492842	0.0206028	TNRC18;HLA-A;PTN;MLLT3
Pyramus (VIII)	4/301	0.959058	0.99999	0	0	0.492842	0.0206028	BTG1;PTPRZ1;VIM;PBX1
Pyramus (VIII), granular layer	4/301	0.959058	0.99999	0	0	0.492842	0.0206028	BTG1;PTPRZ1;VIM;PBX1
Pyramus (VIII), molecular layer	4/301	0.959058	0.99999	0	0	0.492842	0.0206028	BTG1;PTPRZ1;VIM;PBX1
Retrosplenial area, dorsal part	4/301	0.959058	0.99999	0	0	0.492842	0.0206028	TNRC18;S100A4;DUSP6;SMARCA4
Retrosplenial area, dorsal part, layer 5	4/301	0.959058	0.99999	0	0	0.492842	0.0206028	CDKN1A;RAB6B;DUSP6;SMARCA4
Retrosplenial area, ventral part, layer 2	4/301	0.959058	0.99999	0	0	0.492842	0.0206028	MMP14;IL1B;HAS2;SMARCA4
Secondary motor area, layer 1	4/301	0.959058	0.99999	0	0	0.492842	0.0206028	ENC1;UBA1;PBX1;SMARCA4
Secondary motor area, layer 5	4/301	0.959058	0.99999	0	0	0.492842	0.0206028	TMEFF1;KIF5C;SH3BGRL3;PTN
Somatomotor areas	4/301	0.959058	0.99999	0	0	0.492842	0.0206028	TMEFF1;ACAP3;SH3BGRL3;MLLT3
Somatosensory areas	4/301	0.959058	0.99999	0	0	0.492842	0.0206028	CNOT7;LRP1;PTN;MLLT3
Subiculum, dorsal part	4/301	0.959058	0.99999	0	0	0.492842	0.0206028	TMEFF1;ZBTB20;SNRNP200;DUSP6
Subiculum, dorsal part, stratum radiatum	4/301	0.959058	0.99999	0	0	0.492842	0.0206028	TMEFF1;ITGB2;ZBTB20;LSS
Subiculum, ventral part, molecular layer	4/301	0.959058	0.99999	0	0	0.492842	0.0206028	GNG2;RPS7;RPL22;ZC3H8
Subparafascicular nucleus, parvicellular part	4/301	0.959058	0.99999	0	0	0.492842	0.0206028	RIMS3;YWHAQ;RGS16;LSS
Superior colliculus, motor related, deep white layer	4/301	0.959058	0.99999	0	0	0.492842	0.0206028	HAS2;SNCG;SNX22;AGRN
Superior olivary complex, periolivary region	4/301	0.959058	0.99999	0	0	0.492842	0.0206028	NRG4;SPP1;HLA-A;RPS13
Supplemental somatosensory area	4/301	0.959058	0.99999	0	0	0.492842	0.0206028	PPT1;PLAUR;IER3;FDFT1
Taenia tecta, dorsal part, layer 1	4/301	0.959058	0.99999	0	0	0.492842	0.0206028	TNFAIP2;HAS2;S100A4;NEUROG2
Taenia tecta, dorsal part, layer 3	4/301	0.959058	0.99999	0	0	0.492842	0.0206028	TOP2A;FLNA;PTN;VAMP2
Taenia tecta, ventral part	4/301	0.959058	0.99999	0	0	0.492842	0.0206028	FTH1;TNFAIP2;HAS2;NEUROG2
Taenia tecta, ventral part, layer 2	4/301	0.959058	0.99999	0	0	0.492842	0.0206028	TMEFF1;ANKRD34A;FTH1;TNFAIP2
Tegmental reticular nucleus	4/301	0.959058	0.99999	0	0	0.492842	0.0206028	STXBP1;ANXA5;ATP5A1;SPP1
Temporal association areas	4/301	0.959058	0.99999	0	0	0.492842	0.0206028	YWHAB;PLAUR;PLIN2;RPS27A
Temporal association areas, layer 6a	4/301	0.959058	0.99999	0	0	0.492842	0.0206028	GNG2;YWHAB;PLAUR;PLIN2
Uvula (IX)	4/301	0.959058	0.99999	0	0	0.492842	0.0206028	BTG1;PTPRZ1;PLIN2;VIM
Uvula (IX), granular layer	4/301	0.959058	0.99999	0	0	0.492842	0.0206028	BTG1;PTPRZ1;PLIN2;VIM
Uvula (IX), molecular layer	4/301	0.959058	0.99999	0	0	0.492842	0.0206028	BTG1;PTPRZ1;PLIN2;VIM
Ventral anterior-lateral complex of the thalamus	4/301	0.959058	0.99999	0	0	0.492842	0.0206028	IL1B;RGS16;NR2F1;L1CAM
Ventral part of the lateral geniculate complex	4/301	0.959058	0.99999	0	0	0.492842	0.0206028	YWHAQ;ZBTB20;MVD;LSS
Ventral posterolateral nucleus of the thalamus, parvicellular part	4/301	0.959058	0.99999	0	0	0.492842	0.0206028	YWHAQ;IL1B;RGS16;WBSCR22
accumbens nucleus, shell domain	4/301	0.959058	0.99999	0	0	0.492842	0.0206028	ALCAM;TSC22D1;YBX1;PHLDA1
alar plate of evaginated telencephalic vesicle	4/301	0.959058	0.99999	0	0	0.492842	0.0206028	CNOT7;ENC1;DCX;DUSP6
amygdalohippocampal area	4/301	0.959058	0.99999	0	0	0.492842	0.0206028	MARCKSL1;PEA15;NR2F1;HDGF
anterior cortical amygdaloid area	4/301	0.959058	0.99999	0	0	0.492842	0.0206028	MARCKSL1;TRIM28;SNX22;PRPH
anterior olfactory area, dorsal part	4/301	0.959058	0.99999	0	0	0.492842	0.0206028	IL1RN;DCX;HAS2;SOX11
anterior pretectal nucleus, ventral superficial part	4/301	0.959058	0.99999	0	0	0.492842	0.0206028	SPARC;PKIA;RGS16;ITGB2
basolateral amygdaloid nucleus, anterior part	4/301	0.959058	0.99999	0	0	0.492842	0.0206028	DNAJA1;NR2F1;PLAUR;AP2M1
basolateral amygdaloid nucleus, ventral part	4/301	0.959058	0.99999	0	0	0.492842	0.0206028	DNAJA1;PLAUR;LCP1;AP2M1
caudal linear (raphe) nucleus	4/301	0.959058	0.99999	0	0	0.492842	0.0206028	FTH1;SDC2;PPM1N;YWHAZ
caudal secondary prosencephalon	4/301	0.959058	0.99999	0	0	0.492842	0.0206028	CNOT7;ENC1;DCX;DUSP6
colliculus superior	4/301	0.959058	0.99999	0	0	0.492842	0.0206028	S100A6;RPL27;NEUROG2;SMARCA4
dorsal terminal nucleus of the accessory optic tract	4/301	0.959058	0.99999	0	0	0.492842	0.0206028	RPL18A;PKIA;ISLR2;ZBTB20
dorsolateral (non-cerebellar) part of isA	4/301	0.959058	0.99999	0	0	0.492842	0.0206028	RPS18;EBF3;RPS20;NCAM1
dorsolateral IC periaqueductal gray	4/301	0.959058	0.99999	0	0	0.492842	0.0206028	RPS8;PLXNA1;SNCG;AGRN
dorsolateral preisthmic part of periaqueductal gray	4/301	0.959058	0.99999	0	0	0.492842	0.0206028	FADS2;RPS18;SNCG;EBF3
external globus pallidum	4/301	0.959058	0.99999	0	0	0.492842	0.0206028	RAB31;TTYH1;LSS;PBX1
intermediate mantle of isBM	4/301	0.959058	0.99999	0	0	0.492842	0.0206028	SDC2;PPM1N;YWHAZ;FDFT1
intermediate part of StrSe	4/301	0.959058	0.99999	0	0	0.492842	0.0206028	SOX2;SYT4;ALCAM;XPR1
intermediate part of r1B	4/301	0.959058	0.99999	0	0	0.492842	0.0206028	RPL12;PLXNA1;SNCG;LSS
intermediate stratum of AOB	4/301	0.959058	0.99999	0	0	0.492842	0.0206028	IL1RN;IL1B;DCX;SOX4
intermediate stratum of AStr	4/301	0.959058	0.99999	0	0	0.492842	0.0206028	TTR;XPR1;WLS;PRPH
intermediate stratum of CoPL	4/301	0.959058	0.99999	0	0	0.492842	0.0206028	LAPTM5;RPL24;RPL27;YWHAG
intermediate stratum of CoPV	4/301	0.959058	0.99999	0	0	0.492842	0.0206028	RPS15A;STXBP1;PPM1N;HNRNPA2B1
intermediate stratum of LAP	4/301	0.959058	0.99999	0	0	0.492842	0.0206028	DNAJA1;NR2F1;PLAUR;AP2M1
intermediate stratum of PO2	4/301	0.959058	0.99999	0	0	0.492842	0.0206028	VAT1;PEG10;STMN3;RPS13
intermediate stratum of SeStr	4/301	0.959058	0.99999	0	0	0.492842	0.0206028	ALCAM;TSC22D1;YBX1;PHLDA1
intermediate stratum of Str	4/301	0.959058	0.99999	0	0	0.492842	0.0206028	CAP1;CNOT7;SCRN1;ID4
intermediate stratum of m1B	4/301	0.959058	0.99999	0	0	0.492842	0.0206028	ACLY;PPM1N;SPP1;SNCG
intermediate stratum of r1BI	4/301	0.959058	0.99999	0	0	0.492842	0.0206028	RPL12;PLXNA1;SNCG;LSS
intermediate stratum of r1BM	4/301	0.959058	0.99999	0	0	0.492842	0.0206028	GNG2;DPYSL5;SDC2;MVD
intermediate stratum of r1Ve	4/301	0.959058	0.99999	0	0	0.492842	0.0206028	LGALS1;SPP1;NEUROG2;WLS
intermediate stratum of r2BL	4/301	0.959058	0.99999	0	0	0.492842	0.0206028	VAT1;SPP1;SNCG;AGRN
intermediate stratum of r2BM	4/301	0.959058	0.99999	0	0	0.492842	0.0206028	PPM1N;SPP1;HMGA1;AP2M1
intermediate stratum of r5Lim	4/301	0.959058	0.99999	0	0	0.492842	0.0206028	LGALS1;SPP1;GPC2;MMP9
intermediate stratum of r8Lim	4/301	0.959058	0.99999	0	0	0.492842	0.0206028	ACLY;CXCL10;LGALS1;EIF4B
intermediate stratum of r9BL	4/301	0.959058	0.99999	0	0	0.492842	0.0206028	TOP2A;NRG4;HMGA1;S100A4
intermediate stratum of r9Tr	4/301	0.959058	0.99999	0	0	0.492842	0.0206028	MVD;YWHAZ;EIF4B;ZMPSTE24
intermedioposterior nucleus	4/301	0.959058	0.99999	0	0	0.492842	0.0206028	NGRN;RGS16;S100A4;L1CAM
internal globus pallidus	4/301	0.959058	0.99999	0	0	0.492842	0.0206028	RAB31;CCL20;LSS;PBX1
intralaminar nuclei	4/301	0.959058	0.99999	0	0	0.492842	0.0206028	RIMS3;RGS16;CTNNB1;L1CAM
isthmic part of the periaqueductal gray	4/301	0.959058	0.99999	0	0	0.492842	0.0206028	RPS18;PLXNA1;RPS20;RPL37
isthmic vestibulocerebellar nucleus	4/301	0.959058	0.99999	0	0	0.492842	0.0206028	PRDX1;DBI;B2M;WLS
lateral part of CoP	4/301	0.959058	0.99999	0	0	0.492842	0.0206028	PKIA;LAPTM5;RPL24;RPL27
lateral part of PcP	4/301	0.959058	0.99999	0	0	0.492842	0.0206028	NGRN;RIMS3;RGS16;LAPTM5
lateral preoptic nucleus, PO2 part	4/301	0.959058	0.99999	0	0	0.492842	0.0206028	VAT1;PEG10;STMN3;RPS13
lateral septal nucleus, intermedio-dorsal part	4/301	0.959058	0.99999	0	0	0.492842	0.0206028	SOX2;SYT4;ALCAM;XPR1
lateral trapezoid nucleus	4/301	0.959058	0.99999	0	0	0.492842	0.0206028	SLC38A1;YWHAQ;TNFAIP2;HSPG2
lateropallial prepiriform area	4/301	0.959058	0.99999	0	0	0.492842	0.0206028	ACTR2;GNG2;ISLR2;PTN
layer 1 of FCx	4/301	0.959058	0.99999	0	0	0.492842	0.0206028	IL1RN;LAPTM5;HAS2;NEUROG2
layer 1 of VPrP cortex	4/301	0.959058	0.99999	0	0	0.492842	0.0206028	HAS2;PTN;HMGCR;AP2M1
layer 2 of InsCx	4/301	0.959058	0.99999	0	0	0.492842	0.0206028	ANKRD34A;ACTR2;LAPTM5;PLAUR
layer 2 of PRh-Ect	4/301	0.959058	0.99999	0	0	0.492842	0.0206028	PLAUR;HMGCR;RPS27A;FDFT1
layer 3 of CCx	4/301	0.959058	0.99999	0	0	0.492842	0.0206028	PLXNA1;TNRC18;HMGCR;DUSP6
layer 4 of CCx	4/301	0.959058	0.99999	0	0	0.492842	0.0206028	MYO5A;HMGCR;DUSP6;SEPT3
layer 4 of PRh-Ect	4/301	0.959058	0.99999	0	0	0.492842	0.0206028	DNAJA1;MYL6;PLAUR;HMGCR
layer 4 of PaS	4/301	0.959058	0.99999	0	0	0.492842	0.0206028	CDH2;PLAUR;TRIB2;VAMP2
layer 5 of RSC	4/301	0.959058	0.99999	0	0	0.492842	0.0206028	CNOT7;YWHAB;TNFAIP2;CTNNB1
liminal part of the r10 alar plate	4/301	0.959058	0.99999	0	0	0.492842	0.0206028	ACLY;LGALS1;MSN;YWHAZ
liminal part of the r8 alar plate	4/301	0.959058	0.99999	0	0	0.492842	0.0206028	ACLY;CXCL10;LGALS1;EIF4B
m2 basal plate	4/301	0.959058	0.99999	0	0	0.492842	0.0206028	SDC2;RPL12;SNCG;EBF3
mammillary part of PHyB	4/301	0.959058	0.99999	0	0	0.492842	0.0206028	IFITM3;IL1RN;S100A6;TIMP1
mantle zone of AOD	4/301	0.959058	0.99999	0	0	0.492842	0.0206028	IL1RN;DCX;HAS2;SOX11
mantle zone of CoPL	4/301	0.959058	0.99999	0	0	0.492842	0.0206028	PKIA;LAPTM5;RPL24;RPL27
mantle zone of LAP	4/301	0.959058	0.99999	0	0	0.492842	0.0206028	MARCKSL1;NR2F1;LCP1;PRPH
mantle zone of LPrP	4/301	0.959058	0.99999	0	0	0.492842	0.0206028	ACTR2;GNG2;ISLR2;PTN
mantle zone of PcPL	4/301	0.959058	0.99999	0	0	0.492842	0.0206028	NGRN;RIMS3;RGS16;LAPTM5
mantle zone of PcPV	4/301	0.959058	0.99999	0	0	0.492842	0.0206028	RIMS3;RGS16;WBSCR22;RPL24
mantle zone of RMa	4/301	0.959058	0.99999	0	0	0.492842	0.0206028	IFITM3;IL1RN;S100A6;TIMP1
mantle zone of SC	4/301	0.959058	0.99999	0	0	0.492842	0.0206028	S100A6;RPL27;NEUROG2;SMARCA4
mantle zone of Str	4/301	0.959058	0.99999	0	0	0.492842	0.0206028	CAP1;CNOT7;SCRN1;ID4
mantle zone of VAP	4/301	0.959058	0.99999	0	0	0.492842	0.0206028	MARCKSL1;PKIA;NR2F1;HDGF
mantle zone of VPrP	4/301	0.959058	0.99999	0	0	0.492842	0.0206028	ACTR2;HAS2;PTN;HMGCR
mantle zone of p2Lim	4/301	0.959058	0.99999	0	0	0.492842	0.0206028	RIMS3;RGS16;RPL24;LSS
mantle zone of p3ZL	4/301	0.959058	0.99999	0	0	0.492842	0.0206028	RAB31;RGS16;NR2F1;LSS
mantle zone of r10Lim	4/301	0.959058	0.99999	0	0	0.492842	0.0206028	ACLY;LGALS1;MSN;YWHAZ
mantle zone of r1BI	4/301	0.959058	0.99999	0	0	0.492842	0.0206028	RPL12;PLXNA1;SNCG;LSS
mantle zone of r8Lim	4/301	0.959058	0.99999	0	0	0.492842	0.0206028	ACLY;CXCL10;LGALS1;EIF4B
mantle zone of r9BM	4/301	0.959058	0.99999	0	0	0.492842	0.0206028	TOP2A;LGALS1;SNCG;SNX22
medial part of r9B	4/301	0.959058	0.99999	0	0	0.492842	0.0206028	TOP2A;LGALS1;SNCG;SNX22
medial pretectal nucleus	4/301	0.959058	0.99999	0	0	0.492842	0.0206028	IFITM3;PPM1N;RPL27;PRDX6
medial trapezoid nucleus	4/301	0.959058	0.99999	0	0	0.492842	0.0206028	TMEFF1;YWHAQ;TNFAIP2;HSPG2
molecular layer of S	4/301	0.959058	0.99999	0	0	0.492842	0.0206028	TMEFF1;CNOT7;RPL22;ZBTB20
navicular nucleus	4/301	0.959058	0.99999	0	0	0.492842	0.0206028	ANKRD34A;FTH1;TNFAIP2;HAS2
neural plate	4/301	0.959058	0.99999	0	0	0.492842	0.0206028	BTG1;FABP7;ENC1;DUSP6
nucleus of the central acoustic tract	4/301	0.959058	0.99999	0	0	0.492842	0.0206028	LGALS1;PRDX1;GPC2;MMP9
nucleus of the inferior collicular brachium, rostral part	4/301	0.959058	0.99999	0	0	0.492842	0.0206028	SPARC;PKIA;RPL12;VIM
nucleus sagulum, superficial part	4/301	0.959058	0.99999	0	0	0.492842	0.0206028	IFITM3;IGFBP2;S100A6;TAGLN2
p3 portion of the substantia nigra pars reticulata	4/301	0.959058	0.99999	0	0	0.492842	0.0206028	MMP14;PABPC4;ZBTB20;GFAP
parvocellular part of the r9LRt	4/301	0.959058	0.99999	0	0	0.492842	0.0206028	TOP2A;NRG4;TIMP1;GFAP
periventricular stratum of IC	4/301	0.959058	0.99999	0	0	0.492842	0.0206028	RPS8;PLXNA1;SNCG;AGRN
periventricular stratum of Ist	4/301	0.959058	0.99999	0	0	0.492842	0.0206028	RPS18;PLXNA1;RPS20;RPL37
periventricular stratum of m2ADL	4/301	0.959058	0.99999	0	0	0.492842	0.0206028	FADS2;RPS18;SNCG;EBF3
periventricular stratum of r1Ve	4/301	0.959058	0.99999	0	0	0.492842	0.0206028	TTR;ITGB2;DBI;SNX22
periventricular stratum of r2BM	4/301	0.959058	0.99999	0	0	0.492842	0.0206028	SYT4;HNRNPA2B1;IGFBP2;YBX1
plexiform layer of TuStr	4/301	0.959058	0.99999	0	0	0.492842	0.0206028	ID4;TNRC18;YBX1;RPS13
pontomedullary hindbrain	4/301	0.959058	0.99999	0	0	0.492842	0.0206028	LGALS1;NRG4;SPP1;HSPG2
posterior (ventral) nucleus	4/301	0.959058	0.99999	0	0	0.492842	0.0206028	RIMS3;RGS16;L1CAM;IER3
posterior tegmental nucleus	4/301	0.959058	0.99999	0	0	0.492842	0.0206028	YWHAQ;SDC2;MVD;AP2M1
posterior triangular nucleus	4/301	0.959058	0.99999	0	0	0.492842	0.0206028	YWHAE;RIMS3;YWHAQ;RGS16
precommissural pretectal domain	4/301	0.959058	0.99999	0	0	0.492842	0.0206028	NGRN;RIMS3;RGS16;LAPTM5
preisthmic tegmentum	4/301	0.959058	0.99999	0	0	0.492842	0.0206028	SDC2;RPL12;SNCG;EBF3
prepontine hindbrain	4/301	0.959058	0.99999	0	0	0.492842	0.0206028	CADM3;BTG1;PTPRZ1;VIM
prethalamic (p3) zona limitans domain	4/301	0.959058	0.99999	0	0	0.492842	0.0206028	RAB31;RGS16;NR2F1;LSS
pterigoid muscle trigeminal motor cell group	4/301	0.959058	0.99999	0	0	0.492842	0.0206028	ACLY;LGALS1;MSN;MVD
putamen	4/301	0.959058	0.99999	0	0	0.492842	0.0206028	CAP1;CNOT7;SCRN1;ID4
r1 part of basointermediate reticular formation	4/301	0.959058	0.99999	0	0	0.492842	0.0206028	RPL12;PLXNA1;SNCG;LSS
r1 part of lateral pontine nuclei	4/301	0.959058	0.99999	0	0	0.492842	0.0206028	NRG4;LAPTM5;RPS13;SMARCA4
r1 part of superior vestibular nucleus	4/301	0.959058	0.99999	0	0	0.492842	0.0206028	LGALS1;SPP1;NEUROG2;WLS
r1 part of vestibular nucleus Y	4/301	0.959058	0.99999	0	0	0.492842	0.0206028	TTR;ITGB2;DBI;SNX22
r1 part of vestibulocerebellar nucleus	4/301	0.959058	0.99999	0	0	0.492842	0.0206028	HNRNPA2B1;ITGB2;DBI;WLS
r10 basal plate	4/301	0.959058	0.99999	0	0	0.492842	0.0206028	TOP2A;LGALS1;SNX22;GFAP
r10 part of basomedial reticular formation	4/301	0.959058	0.99999	0	0	0.492842	0.0206028	TOP2A;LGALS1;SNX22;YWHAZ
r10 part of external cuneate nucleus	4/301	0.959058	0.99999	0	0	0.492842	0.0206028	VAT1;PLIN2;MVD;YWHAZ
r10 part of the inferior olive	4/301	0.959058	0.99999	0	0	0.492842	0.0206028	TOP2A;TRIM28;DPYSL5;GFAP
r2 part of principal trigeminal sensory nucleus	4/301	0.959058	0.99999	0	0	0.492842	0.0206028	CCL20;CFL1;SPP1;LSS
r2 part of the trigeminal motor nucleus	4/301	0.959058	0.99999	0	0	0.492842	0.0206028	ACLY;LGALS1;MSN;AP2M1
r3 basal plate	4/301	0.959058	0.99999	0	0	0.492842	0.0206028	ANXA5;SPP1;HMGA1;NEFL
r3 part of basomedial reticular formation	4/301	0.959058	0.99999	0	0	0.492842	0.0206028	KIF5C;ANXA5;SPP1;SNX22
r4 part of medial paralemniscal nucleus	4/301	0.959058	0.99999	0	0	0.492842	0.0206028	YWHAQ;SPP1;UBA1;YWHAZ
r4 part of ventral lateral lemniscal nucleus	4/301	0.959058	0.99999	0	0	0.492842	0.0206028	NRG4;WBSCR22;SPP1;RPL37
r5 part of ventral lateral lemniscal nucleus	4/301	0.959058	0.99999	0	0	0.492842	0.0206028	NRG4;SPP1;ND3;RPS13
r5 part of ventral parvicellular reticular formation	4/301	0.959058	0.99999	0	0	0.492842	0.0206028	LGALS1;SPP1;GPC2;MMP9
r6 part of basomedial reticular formation	4/301	0.959058	0.99999	0	0	0.492842	0.0206028	SYT4;SPP1;SNX22;PBX1
r6 part of spinal trigeminal nucleus, pars oralis	4/301	0.959058	0.99999	0	0	0.492842	0.0206028	RPL18A;HNRNPA2B1;LAPTM5;FGFBP3
r8 part of ventral parvicellular reticular formation	4/301	0.959058	0.99999	0	0	0.492842	0.0206028	ACLY;CXCL10;LGALS1;EIF4B
r8 portion of ambiguous motor nucleus	4/301	0.959058	0.99999	0	0	0.492842	0.0206028	TOP2A;LGALS1;EIF4B;IER3
r9 basal plate	4/301	0.959058	0.99999	0	0	0.492842	0.0206028	TOP2A;LGALS1;SNX22;GFAP
r9 part of dorsal parvicellular reticular formation	4/301	0.959058	0.99999	0	0	0.492842	0.0206028	RPL37A;HMGA1;MVD;YWHAZ
r9 part of the basolateral reticular formation	4/301	0.959058	0.99999	0	0	0.492842	0.0206028	TOP2A;NRG4;HMGA1;S100A4
r9 part of the inferior olive	4/301	0.959058	0.99999	0	0	0.492842	0.0206028	TOP2A;TRIM28;SMARCA4;GFAP
red nucleus, magnocellular part	4/301	0.959058	0.99999	0	0	0.492842	0.0206028	FABP5;YWHAQ;PPM1N;SNCG
reticular formation of CoPD	4/301	0.959058	0.99999	0	0	0.492842	0.0206028	RPL18A;LAPTM5;CTNNB1;ZBTB20
retromammillary area	4/301	0.959058	0.99999	0	0	0.492842	0.0206028	IFITM3;IL1RN;S100A6;TIMP1
rhombomere 1	4/301	0.959058	0.99999	0	0	0.492842	0.0206028	CADM3;BTG1;PTPRZ1;VIM
rhombomere 3	4/301	0.959058	0.99999	0	0	0.492842	0.0206028	ANXA5;SPP1;HMGA1;NEFL
rhombomere 5	4/301	0.959058	0.99999	0	0	0.492842	0.0206028	LGALS1;TTR;SPP1;HSPG2
rhombomere 6	4/301	0.959058	0.99999	0	0	0.492842	0.0206028	SYT4;FABP5;NRG4;MSN
secondary prosencephalon	4/301	0.959058	0.99999	0	0	0.492842	0.0206028	CNOT7;ENC1;DCX;DUSP6
septopallidal shell area	4/301	0.959058	0.99999	0	0	0.492842	0.0206028	ALCAM;TSC22D1;ZBTB20;PHLDA1
septostriatal part of the olfactory tuberculum	4/301	0.959058	0.99999	0	0	0.492842	0.0206028	CXCL10;NRG4;TNFAIP2;TNRC18
striatum (corpus striatum)	4/301	0.959058	0.99999	0	0	0.492842	0.0206028	CAP1;CNOT7;SCRN1;ID4
sublayer 6b of InsCx	4/301	0.959058	0.99999	0	0	0.492842	0.0206028	TMEFF1;ACAP3;FASN;MLLT3
submammillothalamic nucleus	4/301	0.959058	0.99999	0	0	0.492842	0.0206028	ANKRD34A;IL1RN;PPM1N;S100A6
superficial gray layer of SC	4/301	0.959058	0.99999	0	0	0.492842	0.0206028	IFITM3;S100A6;NEUROG2;SMARCA4
superficial stratum of AOD	4/301	0.959058	0.99999	0	0	0.492842	0.0206028	IL1RN;DCX;HAS2;SOX11
superficial stratum of PO2	4/301	0.959058	0.99999	0	0	0.492842	0.0206028	PEG10;RGS16;UBA1;GFAP
superficial stratum of PcPV	4/301	0.959058	0.99999	0	0	0.492842	0.0206028	SPARC;PKIA;RGS16;ITGB2
superficial stratum of SC	4/301	0.959058	0.99999	0	0	0.492842	0.0206028	IFITM3;S100A6;NEUROG2;SMARCA4
superficial stratum of SeStr	4/301	0.959058	0.99999	0	0	0.492842	0.0206028	CXCL10;NRG4;TNFAIP2;TNRC18
superficial stratum of TG	4/301	0.959058	0.99999	0	0	0.492842	0.0206028	IFITM3;MMP14;RPL27;GFAP
superficial stratum of THyB-D	4/301	0.959058	0.99999	0	0	0.492842	0.0206028	IFITM3;VAT1;TRIM28;ZC3H8
superficial stratum of THyB-V	4/301	0.959058	0.99999	0	0	0.492842	0.0206028	IFITM3;TRIM28;RPL12;ZC3H8
superficial stratum of m2ADL	4/301	0.959058	0.99999	0	0	0.492842	0.0206028	IFITM3;IGFBP2;S100A6;TAGLN2
superficial stratum of p2B	4/301	0.959058	0.99999	0	0	0.492842	0.0206028	IFITM3;SDC2;PABPC4;GFAP
superficial stratum of p3B	4/301	0.959058	0.99999	0	0	0.492842	0.0206028	MMP14;FABP5;PABPC4;ZBTB20
superficial stratum of r10Ve	4/301	0.959058	0.99999	0	0	0.492842	0.0206028	VAT1;PLIN2;MVD;YWHAZ
superficial stratum of r1BI	4/301	0.959058	0.99999	0	0	0.492842	0.0206028	NRG4;LAPTM5;RPS13;SMARCA4
superficial stratum of r2Lim	4/301	0.959058	0.99999	0	0	0.492842	0.0206028	ACLY;LGALS1;MSN;AP2M1
superficial stratum of r2Tr	4/301	0.959058	0.99999	0	0	0.492842	0.0206028	CCL20;CFL1;SPP1;LSS
superficial stratum of r5BI	4/301	0.959058	0.99999	0	0	0.492842	0.0206028	SLC38A1;YWHAQ;TNFAIP2;HSPG2
superficial stratum of r5BM	4/301	0.959058	0.99999	0	0	0.492842	0.0206028	TMEFF1;YWHAQ;TNFAIP2;HSPG2
superficial stratum of r6Tr	4/301	0.959058	0.99999	0	0	0.492842	0.0206028	RPL18A;HNRNPA2B1;LAPTM5;FGFBP3
superficial stratum of r8Lim	4/301	0.959058	0.99999	0	0	0.492842	0.0206028	TOP2A;LGALS1;EIF4B;IER3
superficial stratum of the VAP	4/301	0.959058	0.99999	0	0	0.492842	0.0206028	MARCKSL1;RPS7;PKIA;NR2F1
telencephalic vesicle	4/301	0.959058	0.99999	0	0	0.492842	0.0206028	CNOT7;ENC1;DCX;DUSP6
temporotympanic muscle trigeminal motor cell group	4/301	0.959058	0.99999	0	0	0.492842	0.0206028	ACLY;LGALS1;LSS;AP2M1
terminal hypothalamus (rostral hypothalamus)	4/301	0.959058	0.99999	0	0	0.492842	0.0206028	IFITM3;TRIM28;PEG10;SDC2
ventral lateral nucleus	4/301	0.959058	0.99999	0	0	0.492842	0.0206028	RIMS3;RGS16;NR2F1;L1CAM
ventral part of PcP	4/301	0.959058	0.99999	0	0	0.492842	0.0206028	RIMS3;RGS16;WBSCR22;RPL24
ventral posterolateral nucleus	4/301	0.959058	0.99999	0	0	0.492842	0.0206028	RAB31;RGS16;NR2F1;CLASP2
ventral tuberomammillary nucleus, superficial part (histaminergic)	4/301	0.959058	0.99999	0	0	0.492842	0.0206028	IFITM3;TRIM28;RPL12;ZC3H8
ventropallial amygdalopiriform area	4/301	0.959058	0.99999	0	0	0.492842	0.0206028	MARCKSL1;PKIA;NR2F1;HDGF
ventropallial prepiriform area	4/301	0.959058	0.99999	0	0	0.492842	0.0206028	ACTR2;HAS2;PTN;HMGCR
Field CA2	6/425	0.970014	0.99999	0	0	0.522673	0.0159125	MMP14;ITGB2;ZBTB20;PLXNA1;ISLR2;VAMP2
Tuberal nucleus	6/427	0.970992	0.99999	0	0	0.520135	0.015311	IFITM3;VAT1;PCSK1N;TRIM28;PEG10;ZC3H8
Induseum griseum	6/435	0.974619	0.99999	0	0	0.510222	0.0131172	MMP14;TNFAIP2;S100A4;HSPG2;DUSP6;NEUROG2
Field CA1, stratum lacunosum-moleculare	5/383	0.975194	0.99999	0	0	0.482918	0.0121303	LAPTM5;ISLR2;ZBTB20;PLXNA1;CRMP1
Field CA1, stratum radiatum	4/345	0.982151	0.99999	0	0	0.428264	0.00771313	ZBTB20;PLXNA1;CRMP1;DUSP6
Field CA2, stratum radiatum	5/410	0.984769	0.99999	0	0	0.450086	0.00690784	ZBTB20;PLXNA1;ISLR2;CRMP1;VAMP2
Abducens nucleus	3/301	0.987	0.99999	0	0	0.36767	0.00481115	SYT4;ANKRD34A;RPS17
Accessory olfactory bulb, glomerular layer	3/301	0.987	0.99999	0	0	0.36767	0.00481115	IL1RN;IL1B;SOX4
Agranular insular area, posterior part	3/301	0.987	0.99999	0	0	0.36767	0.00481115	GNG2;ISLR2;FDFT1
Agranular insular area, ventral part, layer 1	3/301	0.987	0.99999	0	0	0.36767	0.00481115	DNAJA1;S100A4;AP2M1
Anterior cingulate area, dorsal part	3/301	0.987	0.99999	0	0	0.36767	0.00481115	S100A6;KIF21B;DUSP6
Anterior olfactory nucleus, dorsal part	3/301	0.987	0.99999	0	0	0.36767	0.00481115	IL1RN;HAS2;SOX11
Anterior olfactory nucleus, external part	3/301	0.987	0.99999	0	0	0.36767	0.00481115	IL1RN;DCX;SMARCA4
Anterior pretectal nucleus	3/301	0.987	0.99999	0	0	0.36767	0.00481115	NGRN;RGS16;LAPTM5
Anterolateral visual area	3/301	0.987	0.99999	0	0	0.36767	0.00481115	PLAUR;HMGCR;DUSP6
Anterolateral visual area, layer 6a	3/301	0.987	0.99999	0	0	0.36767	0.00481115	YWHAB;PLAUR;HMGCR
Basic cell groups and regions	3/301	0.987	0.99999	0	0	0.36767	0.00481115	FABP7;ENC1;DUSP6
Basolateral amygdalar nucleus	3/301	0.987	0.99999	0	0	0.36767	0.00481115	NR2F1;PLAUR;AP2M1
Central lobule	3/301	0.987	0.99999	0	0	0.36767	0.00481115	BTG1;PTPRZ1;VIM
Cerebrum	3/301	0.987	0.99999	0	0	0.36767	0.00481115	ENC1;DCX;DUSP6
Cortical amygdalar area, anterior part, layer 1	3/301	0.987	0.99999	0	0	0.36767	0.00481115	MARCKSL1;TRIM28;PRPH
Ectorhinal area/Layer 5	3/301	0.987	0.99999	0	0	0.36767	0.00481115	YWHAB;PLIN2;RPS27A
Flocculus	3/301	0.987	0.99999	0	0	0.36767	0.00481115	BTG1;ITGB2;ATN1
Frontal pole, cerebral cortex	3/301	0.987	0.99999	0	0	0.36767	0.00481115	IFITM3;IL1RN;SOX4
Geniculate group, dorsal thalamus	3/301	0.987	0.99999	0	0	0.36767	0.00481115	RPL18A;RGS16;ZBTB20
Gracile nucleus	3/301	0.987	0.99999	0	0	0.36767	0.00481115	PLIN2;MVD;LSS
Granular lamina of the cochlear nuclei	3/301	0.987	0.99999	0	0	0.36767	0.00481115	CCL20;IGFBP2;WLS
Inferior salivatory nucleus	3/301	0.987	0.99999	0	0	0.36767	0.00481115	YWHAQ;RPL37;AP2M1
Infralimbic area, layer 2/3	3/301	0.987	0.99999	0	0	0.36767	0.00481115	S100A6;SOX11;NEUROG2
Infralimbic area, layer 5	3/301	0.987	0.99999	0	0	0.36767	0.00481115	CDKN1A;S100A6;DUSP6
Intermediate reticular nucleus	3/301	0.987	0.99999	0	0	0.36767	0.00481115	TAGLN2;AGRN;EIF4B
Lateral posterior nucleus of the thalamus	3/301	0.987	0.99999	0	0	0.36767	0.00481115	NGRN;RGS16;MLLT3
Lobule III, molecular layer	3/301	0.987	0.99999	0	0	0.36767	0.00481115	BTG1;PTPRZ1;VIM
Medial geniculate complex, medial part	3/301	0.987	0.99999	0	0	0.36767	0.00481115	RIMS3;RGS16;HAS2
Medulla	3/301	0.987	0.99999	0	0	0.36767	0.00481115	TOP2A;LGALS1;SNX22
Medullary reticular nucleus, dorsal part	3/301	0.987	0.99999	0	0	0.36767	0.00481115	FTH1;YWHAZ;EIF4B
Medullary reticular nucleus, ventral part	3/301	0.987	0.99999	0	0	0.36767	0.00481115	TOP2A;LGALS1;S100A4
Midbrain, sensory related	3/301	0.987	0.99999	0	0	0.36767	0.00481115	S100A6;UBA1;SMARCA4
Nodulus (X), molecular layer	3/301	0.987	0.99999	0	0	0.36767	0.00481115	TTR;ITGB2;VIM
Nucleus of the brachium of the inferior colliculus	3/301	0.987	0.99999	0	0	0.36767	0.00481115	SPARC;CCL20;PKIA
Nucleus of the lateral lemniscus, horizontal part	3/301	0.987	0.99999	0	0	0.36767	0.00481115	SYT4;IL1RN;PLIN2
Nucleus of the solitary tract, lateral part	3/301	0.987	0.99999	0	0	0.36767	0.00481115	RPL37A;SOX11;MVD
Orbital area, ventrolateral part, layer 1	3/301	0.987	0.99999	0	0	0.36767	0.00481115	IL1RN;SOX4;NEUROG2
Paraflocculus, granular layer	3/301	0.987	0.99999	0	0	0.36767	0.00481115	BTG1;LCP1;ZMPSTE24
Paraflocculus, molecular layer	3/301	0.987	0.99999	0	0	0.36767	0.00481115	BTG1;ATN1;LCP1
Piriform-amygdalar area, molecular layer	3/301	0.987	0.99999	0	0	0.36767	0.00481115	MARCKSL1;IL1RAPL1;RPS13
Pons, sensory related	3/301	0.987	0.99999	0	0	0.36767	0.00481115	LGALS1;PRDX1;SPP1
Pontine central gray	3/301	0.987	0.99999	0	0	0.36767	0.00481115	SYT4;IGFBP2;SNCG
Pontine reticular nucleus, caudal part	3/301	0.987	0.99999	0	0	0.36767	0.00481115	SPP1;AGRN;HSPG2
Postsubiculum, layer 1	3/301	0.987	0.99999	0	0	0.36767	0.00481115	IFITM3;S100A6;UBA1
Prelimbic area, layer 5	3/301	0.987	0.99999	0	0	0.36767	0.00481115	IL1RN;YWHAB;PPT1
Pretectal region	3/301	0.987	0.99999	0	0	0.36767	0.00481115	NGRN;RGS16;LAPTM5
Primary motor area, Layer 1	3/301	0.987	0.99999	0	0	0.36767	0.00481115	TRIM28;ENC1;MLLT3
Primary motor area, Layer 2/3	3/301	0.987	0.99999	0	0	0.36767	0.00481115	ANKRD34A;ENC1;MLLT3
Primary somatosensory area, lower limb	3/301	0.987	0.99999	0	0	0.36767	0.00481115	HMGCR;MLLT3;DUSP6
Primary somatosensory area, lower limb, layer 1	3/301	0.987	0.99999	0	0	0.36767	0.00481115	TRIM28;ENC1;CDK5R1
Primary somatosensory area, nose, layer 6b	3/301	0.987	0.99999	0	0	0.36767	0.00481115	ACTR2;PLAUR;ACTN4
Primary somatosensory area, trunk, layer 2/3	3/301	0.987	0.99999	0	0	0.36767	0.00481115	ENC1;TNRC18;DUSP6
Primary somatosensory area, unassigned, layer 5	3/301	0.987	0.99999	0	0	0.36767	0.00481115	LASP1;PTN;MLLT3
Primary somatosensory area, upper limb, layer 1	3/301	0.987	0.99999	0	0	0.36767	0.00481115	TRIM28;HLA-A;MLLT3
Primary visual area, layer 2/3	3/301	0.987	0.99999	0	0	0.36767	0.00481115	TNRC18;DUSP6;MCL1
Retrochiasmatic area	3/301	0.987	0.99999	0	0	0.36767	0.00481115	IFITM3;TRIM28;PEG10
Retrosplenial area, dorsal part, layer 2/3	3/301	0.987	0.99999	0	0	0.36767	0.00481115	PPM1N;DUSP6;SMARCA4
Retrosplenial area, ventral part, layer 2/3	3/301	0.987	0.99999	0	0	0.36767	0.00481115	MMP14;IL1B;SMARCA4
Retrosplenial area, ventral part, layer 6a	3/301	0.987	0.99999	0	0	0.36767	0.00481115	MYO5A;S100A4;MLLT3
Retrosplenial area, ventral part, layer 6b	3/301	0.987	0.99999	0	0	0.36767	0.00481115	MLLT3;VAMP2;SEPT3
Spinal nucleus of the trigeminal, oral part, middle dorsomedial part, dorsal zone	3/301	0.987	0.99999	0	0	0.36767	0.00481115	YWHAQ;WBSCR22;AP2M1
Substantia nigra, reticular part	3/301	0.987	0.99999	0	0	0.36767	0.00481115	PABPC4;MMP9;GFAP
Superior colliculus, motor related, intermediate gray layer, sublayer a	3/301	0.987	0.99999	0	0	0.36767	0.00481115	LAPTM5;RPL27;GFAP
Superior colliculus, motor related, intermediate gray layer, sublayer c	3/301	0.987	0.99999	0	0	0.36767	0.00481115	PPM1N;RPL24;RPL27
Superior olivary complex, medial part	3/301	0.987	0.99999	0	0	0.36767	0.00481115	LGALS1;PABPC4;RPL12
Taenia tecta, dorsal part, layer 2	3/301	0.987	0.99999	0	0	0.36767	0.00481115	TMEFF1;HAS2;NEUROG2
Temporal association areas, layer 5	3/301	0.987	0.99999	0	0	0.36767	0.00481115	PLAUR;PLIN2;RPS27A
Temporal association areas, layer 6b	3/301	0.987	0.99999	0	0	0.36767	0.00481115	DNAJA1;PLAUR;HNRNPC
Ventral cochlear nucleus	3/301	0.987	0.99999	0	0	0.36767	0.00481115	CCL20;PLIN2;RBMX
Vestibular nuclei	3/301	0.987	0.99999	0	0	0.36767	0.00481115	TTR;ITGB2;SOX11
alar plate of p1	3/301	0.987	0.99999	0	0	0.36767	0.00481115	RGS16;LAPTM5;RPL24
basointermediate isthmic reticular formation	3/301	0.987	0.99999	0	0	0.36767	0.00481115	FTH1;RPL12;SNCG
central subpallium (classic basal ganglia)	3/301	0.987	0.99999	0	0	0.36767	0.00481115	CAP1;TTYH1;ID4
cerebellar nuclei of CbH	3/301	0.987	0.99999	0	0	0.36767	0.00481115	ITGB2;DBI;PBX1
dorsal lateral geniculate nucleus	3/301	0.987	0.99999	0	0	0.36767	0.00481115	RGS16;HNRNPC;CLASP2
dorsolateral part of Lat	3/301	0.987	0.99999	0	0	0.36767	0.00481115	CADM3;BTG1;RBMX
external cortical nucleus of inferior colliculus	3/301	0.987	0.99999	0	0	0.36767	0.00481115	IFITM3;S100A6;PLIN2
external part of AOV	3/301	0.987	0.99999	0	0	0.36767	0.00481115	IL1RN;DCX;SOX4
forebrain	3/301	0.987	0.99999	0	0	0.36767	0.00481115	ENC1;DCX;DUSP6
horizontal nucleus of the diagonal band	3/301	0.987	0.99999	0	0	0.36767	0.00481115	PABPC4;TIMP1;RPS13
intermediate part of r9B	3/301	0.987	0.99999	0	0	0.36767	0.00481115	TOP2A;LGALS1;SNCG
intermediate stratum of 5BL	3/301	0.987	0.99999	0	0	0.36767	0.00481115	RPL12;SPP1;MMP9
intermediate stratum of CbH	3/301	0.987	0.99999	0	0	0.36767	0.00481115	ITGB2;DBI;PBX1
intermediate stratum of RMa	3/301	0.987	0.99999	0	0	0.36767	0.00481115	IFITM3;IL1RN;RPS13
intermediate stratum of isBI	3/301	0.987	0.99999	0	0	0.36767	0.00481115	FTH1;RPL12;SNCG
intermediate stratum of p1Lim	3/301	0.987	0.99999	0	0	0.36767	0.00481115	HAS2;AP2M1;SMARCA4
intermediate stratum of r10BM	3/301	0.987	0.99999	0	0	0.36767	0.00481115	TOP2A;LGALS1;SNX22
intermediate stratum of r10Tr	3/301	0.987	0.99999	0	0	0.36767	0.00481115	APC2;HMGA1;YWHAZ
intermediate stratum of r10Ve	3/301	0.987	0.99999	0	0	0.36767	0.00481115	MMP14;ZC3H8;UBA1
intermediate stratum of r2BI	3/301	0.987	0.99999	0	0	0.36767	0.00481115	SPP1;HMGA1;AGRN
intermediate stratum of r2Tr	3/301	0.987	0.99999	0	0	0.36767	0.00481115	LGALS1;SPP1;MSN
intermediate stratum of r3BI	3/301	0.987	0.99999	0	0	0.36767	0.00481115	SPP1;AGRN;AP2M1
intermediate stratum of r3BM	3/301	0.987	0.99999	0	0	0.36767	0.00481115	ANXA5;SPP1;HMGA1
intermediate stratum of r4BM	3/301	0.987	0.99999	0	0	0.36767	0.00481115	ANXA5;SPP1;ZMPSTE24
intermediate stratum of r6BM	3/301	0.987	0.99999	0	0	0.36767	0.00481115	SYT4;FABP5;SNX22
intermediate stratum of r7Tr	3/301	0.987	0.99999	0	0	0.36767	0.00481115	SOX11;TAGLN2;EIF4B
intermediate stratum of r8BM	3/301	0.987	0.99999	0	0	0.36767	0.00481115	TOP2A;SNCG;SNX22
intermediate stratum of r8Tr	3/301	0.987	0.99999	0	0	0.36767	0.00481115	SOX11;EIF4B;ZMPSTE24
intermediate stratum of r9BM	3/301	0.987	0.99999	0	0	0.36767	0.00481115	TOP2A;SNCG;SNX22
intermediate stratum of r9Ve	3/301	0.987	0.99999	0	0	0.36767	0.00481115	IL1B;EBF3;UBA1
isthmic part of the intermediate lateral lemniscal nucleus	3/301	0.987	0.99999	0	0	0.36767	0.00481115	SYT4;IL1RN;RPS20
lateral (dentate) cerebellar nucleus	3/301	0.987	0.99999	0	0	0.36767	0.00481115	CCL20;ITGB2;DBI
lateral pallium	3/301	0.987	0.99999	0	0	0.36767	0.00481115	IL1RN;PLAUR;DCX
lateral part of Med	3/301	0.987	0.99999	0	0	0.36767	0.00481115	BTG1;SOX11;PBX1
lateral part of m2A	3/301	0.987	0.99999	0	0	0.36767	0.00481115	RPS8;PLXNA1;EBF3
lateral part of r3B	3/301	0.987	0.99999	0	0	0.36767	0.00481115	NRG4;WBSCR22;SPP1
lateral part of r4B	3/301	0.987	0.99999	0	0	0.36767	0.00481115	WBSCR22;SPP1;MMP9
lateral periretromammillary nucleus	3/301	0.987	0.99999	0	0	0.36767	0.00481115	PABPC4;RPL12;RPS13
layer 1 of AOD cortex	3/301	0.987	0.99999	0	0	0.36767	0.00481115	IL1RN;LAPTM5;SOX11
layer 1 of PCx	3/301	0.987	0.99999	0	0	0.36767	0.00481115	TRIM28;ENC1;DUSP6
layer 1 of PrS	3/301	0.987	0.99999	0	0	0.36767	0.00481115	HNRNPK;PKIA;VIM
layer 2 of FCx	3/301	0.987	0.99999	0	0	0.36767	0.00481115	IL1RN;LAPTM5;NEUROG2
layer 2 of RSC	3/301	0.987	0.99999	0	0	0.36767	0.00481115	TNFAIP2;PLIN2;HMGCR
layer 3 of FCx	3/301	0.987	0.99999	0	0	0.36767	0.00481115	ANKRD34A;IL1RN;SH3BGRL3
layer 3 of LPrP cortex	3/301	0.987	0.99999	0	0	0.36767	0.00481115	ACTR2;ISLR2;PTN
layer 3 of PCx	3/301	0.987	0.99999	0	0	0.36767	0.00481115	ENC1;TNRC18;DUSP6
layer 3 of PrS	3/301	0.987	0.99999	0	0	0.36767	0.00481115	TMEFF1;HNRNPK;TRIB2
layer 4 of PCx	3/301	0.987	0.99999	0	0	0.36767	0.00481115	LASP1;TNRC18;PTN
layer 4 of RSC	3/301	0.987	0.99999	0	0	0.36767	0.00481115	TNFAIP2;CTNNB1;HMGCR
layer 5 of CCx	3/301	0.987	0.99999	0	0	0.36767	0.00481115	TMEFF1;PPT1;SEPT3
layer 5 of ERCx	3/301	0.987	0.99999	0	0	0.36767	0.00481115	DNAJA1;CDH2;PLIN2
layer 5 of PRh-Ect	3/301	0.987	0.99999	0	0	0.36767	0.00481115	DNAJA1;PLAUR;HNRNPC
layer 5 of PaS	3/301	0.987	0.99999	0	0	0.36767	0.00481115	CAP1;CNOT7;TRIB2
liminal part of r2 alar plate	3/301	0.987	0.99999	0	0	0.36767	0.00481115	LGALS1;MSN;LCP1
magnocellular superficial hypothalamic nucleus	3/301	0.987	0.99999	0	0	0.36767	0.00481115	FABP5;PEG10;GFAP
mantle zone of IC	3/301	0.987	0.99999	0	0	0.36767	0.00481115	S100A6;HAS2;PLXNA1
mantle zone of JcPV	3/301	0.987	0.99999	0	0	0.36767	0.00481115	PPM1N;MRFAP1;PRDX6
mantle zone of TG	3/301	0.987	0.99999	0	0	0.36767	0.00481115	TRIM28;RPL27;GFAP
mantle zone of TSPaA	3/301	0.987	0.99999	0	0	0.36767	0.00481115	IFITM3;CXCL10;PEG10
mantle zone of VTTh	3/301	0.987	0.99999	0	0	0.36767	0.00481115	RIMS3;RGS16;LSS
mantle zone of m2AL	3/301	0.987	0.99999	0	0	0.36767	0.00481115	RPS8;PLXNA1;EBF3
mantle zone of r10Ve	3/301	0.987	0.99999	0	0	0.36767	0.00481115	ZC3H8;PLIN2;UBA1
mantle zone of r1BM	3/301	0.987	0.99999	0	0	0.36767	0.00481115	DPYSL5;SDC2;MVD
mantle zone of r2Co	3/301	0.987	0.99999	0	0	0.36767	0.00481115	BTG1;IGFBP2;LCP1
mantle zone of r2Lim	3/301	0.987	0.99999	0	0	0.36767	0.00481115	LGALS1;MSN;LCP1
mantle zone of r2Tr	3/301	0.987	0.99999	0	0	0.36767	0.00481115	LGALS1;SPP1;LSS
mantle zone of r3BL	3/301	0.987	0.99999	0	0	0.36767	0.00481115	NRG4;WBSCR22;SPP1
mantle zone of r4BI	3/301	0.987	0.99999	0	0	0.36767	0.00481115	SPP1;AGRN;MMP9
mantle zone of r4BL	3/301	0.987	0.99999	0	0	0.36767	0.00481115	WBSCR22;SPP1;MMP9
mantle zone of r5Ve	3/301	0.987	0.99999	0	0	0.36767	0.00481115	TTR;IGFBP2;SOX11
mantle zone of r6BM	3/301	0.987	0.99999	0	0	0.36767	0.00481115	SYT4;FABP5;SNX22
mantle zone of r6Ve	3/301	0.987	0.99999	0	0	0.36767	0.00481115	TTR;ITGB2;SOX11
mantle zone of r7Co	3/301	0.987	0.99999	0	0	0.36767	0.00481115	FADS2;MMP14;WLS
mantle zone of r8BM	3/301	0.987	0.99999	0	0	0.36767	0.00481115	TOP2A;SNCG;SNX22
mantle zone of r9BI	3/301	0.987	0.99999	0	0	0.36767	0.00481115	TOP2A;LGALS1;SNCG
mantle zone of the IG	3/301	0.987	0.99999	0	0	0.36767	0.00481115	S100A4;HSPG2;NEUROG2
medial basal reticular formation of m1	3/301	0.987	0.99999	0	0	0.36767	0.00481115	IL1B;WBSCR22;EBF3
medial part of r1B	3/301	0.987	0.99999	0	0	0.36767	0.00481115	DPYSL5;SDC2;MVD
medial part of r6B	3/301	0.987	0.99999	0	0	0.36767	0.00481115	SYT4;FABP5;SNX22
medial part of r8B	3/301	0.987	0.99999	0	0	0.36767	0.00481115	TOP2A;SNCG;SNX22
nucleus of the inferior collicular brachium, caudal part	3/301	0.987	0.99999	0	0	0.36767	0.00481115	IFITM3;TOP2A;S100A6
p1 part of the substantia nigra reticulata	3/301	0.987	0.99999	0	0	0.36767	0.00481115	PABPC4;MMP9;GFAP
p2 portion of the substantia nigra pars reticulata	3/301	0.987	0.99999	0	0	0.36767	0.00481115	PABPC4;LAPTM5;GFAP
perilemniscal isthmic area	3/301	0.987	0.99999	0	0	0.36767	0.00481115	CFL1;S100A6;NEUROG2
periventricular stratum of r2Co	3/301	0.987	0.99999	0	0	0.36767	0.00481115	MMP14;BTG1;IGFBP2
periventricular stratum of r2Lim	3/301	0.987	0.99999	0	0	0.36767	0.00481115	FADS2;IGFBP2;PLIN2
periventricular stratum of r3Co	3/301	0.987	0.99999	0	0	0.36767	0.00481115	MMP14;IGFBP2;ITGB2
periventricular stratum of r3Ve	3/301	0.987	0.99999	0	0	0.36767	0.00481115	RPS17;TTR;IGFBP2
periventricular stratum of r4Co	3/301	0.987	0.99999	0	0	0.36767	0.00481115	MMP14;TTR;LCP1
periventricular stratum of r4Lim	3/301	0.987	0.99999	0	0	0.36767	0.00481115	VAT1;RPS17;IGFBP2
periventricular stratum of r5Co	3/301	0.987	0.99999	0	0	0.36767	0.00481115	MMP14;CCL20;WLS
periventricular stratum of r6Co	3/301	0.987	0.99999	0	0	0.36767	0.00481115	FADS2;MMP14;CCL20
periventricular stratum of r7Tr	3/301	0.987	0.99999	0	0	0.36767	0.00481115	ACLY;SYT4;SNX22
periventricular stratum of r8Ve	3/301	0.987	0.99999	0	0	0.36767	0.00481115	S100A6;PLIN2;YWHAZ
pontine hindbrain	3/301	0.987	0.99999	0	0	0.36767	0.00481115	ANXA5;SPP1;HMGA1
posterior part of Int	3/301	0.987	0.99999	0	0	0.36767	0.00481115	ITGB2;DBI;PBX1
pretectum	3/301	0.987	0.99999	0	0	0.36767	0.00481115	RGS16;LAPTM5;RPL24
pyramidal layer of IG	3/301	0.987	0.99999	0	0	0.36767	0.00481115	S100A4;HSPG2;NEUROG2
r1 basal plate	3/301	0.987	0.99999	0	0	0.36767	0.00481115	VAT1;SNCG;MVD
r1 part of principal trigeminal sensory nucleus	3/301	0.987	0.99999	0	0	0.36767	0.00481115	LGALS1;HAS2;NEUROG2
r10 part of dorsal parvicellular reticular formation	3/301	0.987	0.99999	0	0	0.36767	0.00481115	APC2;HMGA1;YWHAZ
r10 part of gigantocellular reticular area	3/301	0.987	0.99999	0	0	0.36767	0.00481115	TOP2A;TSC22D1;SNX22
r10 part of spinal trigeminal nucleus, caudal part	3/301	0.987	0.99999	0	0	0.36767	0.00481115	EBF3;TNRC18;ATP9A
r10 part of spinal vestibular nucleus	3/301	0.987	0.99999	0	0	0.36767	0.00481115	MMP14;ZC3H8;UBA1
r10 part of the vestibular column	3/301	0.987	0.99999	0	0	0.36767	0.00481115	ZC3H8;PLIN2;UBA1
r2 alar plate	3/301	0.987	0.99999	0	0	0.36767	0.00481115	LGALS1;SPP1;LSS
r2 liminal central gray	3/301	0.987	0.99999	0	0	0.36767	0.00481115	FADS2;IGFBP2;PLIN2
r2 part of anteroventral cochlear nucleus	3/301	0.987	0.99999	0	0	0.36767	0.00481115	BTG1;IGFBP2;LCP1
r2 part of cochlear sensory column	3/301	0.987	0.99999	0	0	0.36767	0.00481115	BTG1;IGFBP2;LCP1
r2 part of dorsal cochlear nucleus	3/301	0.987	0.99999	0	0	0.36767	0.00481115	MMP14;BTG1;IGFBP2
r2 part of dorsal parvicellular reticular formation	3/301	0.987	0.99999	0	0	0.36767	0.00481115	LGALS1;SPP1;MSN
r2 part of trigeminal sensory column	3/301	0.987	0.99999	0	0	0.36767	0.00481115	LGALS1;SPP1;LSS
r2 part of ventral lateral lemniscal nucleus	3/301	0.987	0.99999	0	0	0.36767	0.00481115	MMP14;TAGLN2;GFAP
r3 part of anteroventral cochlear nucleus	3/301	0.987	0.99999	0	0	0.36767	0.00481115	IGFBP2;PLIN2;WLS
r3 part of basointermediate reticular formation	3/301	0.987	0.99999	0	0	0.36767	0.00481115	SPP1;AGRN;AP2M1
r3 part of dorsal cochlear nucleus	3/301	0.987	0.99999	0	0	0.36767	0.00481115	MMP14;IGFBP2;ITGB2
r3 part of parvicellular medial vestibular nucleus	3/301	0.987	0.99999	0	0	0.36767	0.00481115	RPS17;TTR;IGFBP2
r3 roof plate	3/301	0.987	0.99999	0	0	0.36767	0.00481115	IFITM3;RPL27;SNX22
r4 liminal central gray	3/301	0.987	0.99999	0	0	0.36767	0.00481115	VAT1;RPS17;IGFBP2
r4 part of dorsal cochlear nucleus	3/301	0.987	0.99999	0	0	0.36767	0.00481115	MMP14;TTR;LCP1
r4 part of lateral pontine nuclei	3/301	0.987	0.99999	0	0	0.36767	0.00481115	NRG4;INA;RPS13
r5 alar plate	3/301	0.987	0.99999	0	0	0.36767	0.00481115	LGALS1;TTR;HNRNPA2B1
r5 part of basolateral reticular formation	3/301	0.987	0.99999	0	0	0.36767	0.00481115	RPL12;SPP1;MMP9
r5 part of basomedial reticular formation	3/301	0.987	0.99999	0	0	0.36767	0.00481115	SPP1;SNX22;HSPG2
r5 part of dorsal cochlear nucleus	3/301	0.987	0.99999	0	0	0.36767	0.00481115	MMP14;CCL20;WLS
r5 part of posteroventral cochlear nucleus	3/301	0.987	0.99999	0	0	0.36767	0.00481115	IFITM3;RPL27;PLIN2
r5 part of the vestibular column	3/301	0.987	0.99999	0	0	0.36767	0.00481115	TTR;IGFBP2;SOX11
r6 basal plate	3/301	0.987	0.99999	0	0	0.36767	0.00481115	SYT4;FABP5;SNX22
r6 part of dorsal cochlear nucleus	3/301	0.987	0.99999	0	0	0.36767	0.00481115	FADS2;MMP14;CCL20
r6 part of paragigantocellular nucleus	3/301	0.987	0.99999	0	0	0.36767	0.00481115	SYT4;IL1B;SNCG
r6 part of posteroventral cochlear nucleus	3/301	0.987	0.99999	0	0	0.36767	0.00481115	CCL20;LCP1;WLS
r6 part of the vestibular column	3/301	0.987	0.99999	0	0	0.36767	0.00481115	TTR;ITGB2;SOX11
r6 part of ventral gigangocellular reticular area	3/301	0.987	0.99999	0	0	0.36767	0.00481115	FABP5;IL1B;SNCG
r7 (gustatory) part of solitary complex	3/301	0.987	0.99999	0	0	0.36767	0.00481115	ACLY;SYT4;SNX22
r7 alar plate	3/301	0.987	0.99999	0	0	0.36767	0.00481115	ACLY;TAGLN2;EIF4B
r7 part of basomedial reticular formation	3/301	0.987	0.99999	0	0	0.36767	0.00481115	SPP1;SNX22;PBX1
r7 part of cochlear column	3/301	0.987	0.99999	0	0	0.36767	0.00481115	FADS2;MMP14;WLS
r7 part of dorsal parvicellular reticular formation	3/301	0.987	0.99999	0	0	0.36767	0.00481115	SOX11;EIF4B;ZMPSTE24
r7 part of parapyramidal nucleus	3/301	0.987	0.99999	0	0	0.36767	0.00481115	NRG4;IL1B;SNCG
r7 part of the posteroventral cochlear nucleus	3/301	0.987	0.99999	0	0	0.36767	0.00481115	IFITM3;SNX22;WLS
r8 part of basomedial reticular formation	3/301	0.987	0.99999	0	0	0.36767	0.00481115	DNAJA1;LGALS1;SNX22
r8 part of dorsal parvicellular reticular formation	3/301	0.987	0.99999	0	0	0.36767	0.00481115	SOX11;EIF4B;ZMPSTE24
r8 part of nucleus of Roller	3/301	0.987	0.99999	0	0	0.36767	0.00481115	ACLY;CXCL10;SNX22
r8 part of parvocellular medial vestibular nucleus	3/301	0.987	0.99999	0	0	0.36767	0.00481115	S100A6;PLIN2;YWHAZ
r9 part of gigantocellular reticular area	3/301	0.987	0.99999	0	0	0.36767	0.00481115	TOP2A;SNCG;SNX22
r9 part of paragigantocellular nucleus	3/301	0.987	0.99999	0	0	0.36767	0.00481115	TOP2A;TRIM28;GFAP
r9 part of spinal vestibular nucleus	3/301	0.987	0.99999	0	0	0.36767	0.00481115	IL1B;EBF3;UBA1
r9 part of trigeminal transition zone	3/301	0.987	0.99999	0	0	0.36767	0.00481115	YWHAZ;EIF4B;ZMPSTE24
reticular formation of CoPL	3/301	0.987	0.99999	0	0	0.36767	0.00481115	LAPTM5;RPL27;YWHAG
reticular formation of p1Lim	3/301	0.987	0.99999	0	0	0.36767	0.00481115	HAS2;AP2M1;SMARCA4
retromammillary area, lateral part	3/301	0.987	0.99999	0	0	0.36767	0.00481115	IFITM3;IL1RN;RPS13
rhombomere 9	3/301	0.987	0.99999	0	0	0.36767	0.00481115	TOP2A;LGALS1;SNX22
root	3/301	0.987	0.99999	0	0	0.36767	0.00481115	FABP7;ENC1;DUSP6
septopallidal part of the olfactory tuberculum	3/301	0.987	0.99999	0	0	0.36767	0.00481115	CXCL10;NRG4;PHLDA1
subbrachial nucleus, rostral part	3/301	0.987	0.99999	0	0	0.36767	0.00481115	SPARC;ITGB2;YWHAZ
subcuneiform nucleus	3/301	0.987	0.99999	0	0	0.36767	0.00481115	WBSCR22;RPS20;YWHAZ
suboptic nucleus	3/301	0.987	0.99999	0	0	0.36767	0.00481115	IFITM3;TRIM28;ZC3H8
superficial stratum of Mam	3/301	0.987	0.99999	0	0	0.36767	0.00481115	PABPC4;RPL12;RPS13
superficial stratum of PHyB-D	3/301	0.987	0.99999	0	0	0.36767	0.00481115	FABP5;PEG10;GFAP
superficial stratum of PHyB-I	3/301	0.987	0.99999	0	0	0.36767	0.00481115	RAB31;FABP5;GFAP
superficial stratum of PHyB-P	3/301	0.987	0.99999	0	0	0.36767	0.00481115	PABPC4;RPL12;RPS13
superficial stratum of SePal	3/301	0.987	0.99999	0	0	0.36767	0.00481115	CXCL10;NRG4;PHLDA1
superficial stratum of m1AL	3/301	0.987	0.99999	0	0	0.36767	0.00481115	SPARC;ITGB2;YWHAZ
superficial stratum of r10Tr	3/301	0.987	0.99999	0	0	0.36767	0.00481115	EBF3;TNRC18;ATP9A
superficial stratum of r1Tr	3/301	0.987	0.99999	0	0	0.36767	0.00481115	LGALS1;HAS2;NEUROG2
superficial stratum of r2BL	3/301	0.987	0.99999	0	0	0.36767	0.00481115	MMP14;TAGLN2;GFAP
superficial stratum of r2Co	3/301	0.987	0.99999	0	0	0.36767	0.00481115	BTG1;IGFBP2;LCP1
superficial stratum of r3Co	3/301	0.987	0.99999	0	0	0.36767	0.00481115	IGFBP2;PLIN2;WLS
superficial stratum of r4BI	3/301	0.987	0.99999	0	0	0.36767	0.00481115	NRG4;INA;RPS13
superficial stratum of r5Co	3/301	0.987	0.99999	0	0	0.36767	0.00481115	IFITM3;RPL27;PLIN2
superficial stratum of r6Co	3/301	0.987	0.99999	0	0	0.36767	0.00481115	CCL20;LCP1;WLS
superficial stratum of r7BM	3/301	0.987	0.99999	0	0	0.36767	0.00481115	NRG4;IL1B;SNCG
superficial stratum of r7Co	3/301	0.987	0.99999	0	0	0.36767	0.00481115	IFITM3;SNX22;WLS
superficial stratum of r9BI	3/301	0.987	0.99999	0	0	0.36767	0.00481115	TOP2A;TRIM28;GFAP
superficial stratum of r9BM	3/301	0.987	0.99999	0	0	0.36767	0.00481115	TOP2A;TRIM28;GFAP
superficial stratum of the IG	3/301	0.987	0.99999	0	0	0.36767	0.00481115	S100A4;HSPG2;NEUROG2
tectal gray formation	3/301	0.987	0.99999	0	0	0.36767	0.00481115	TRIM28;RPL27;GFAP
terminal subparaventricular area of THyA	3/301	0.987	0.99999	0	0	0.36767	0.00481115	IFITM3;CXCL10;PEG10
ventral part of JcP	3/301	0.987	0.99999	0	0	0.36767	0.00481115	PPM1N;MRFAP1;PRDX6
ventral tier of thalamus	3/301	0.987	0.99999	0	0	0.36767	0.00481115	RIMS3;RGS16;LSS
Nucleus of the lateral olfactory tract	4/373	0.9897	0.99999	0	0	0.395188	0.00409162	ACAP3;MARCKSL1;RPL21;AP2M1
Lateral mammillary nucleus	4/384	0.991734	0.99999	0	0	0.383528	0.00318345	PABPC4;RPL12;TIMP1;RPS13
Subgeniculate nucleus	5/443	0.991772	0.99999	0	0	0.415455	0.00343234	YWHAQ;ZBTB20;MSN;MVD;LSS
Paracentral nucleus	3/353	0.99578	0.99999	0	0	0.312196	0.00132029	RIMS3;RGS16;L1CAM
Anterior cingulate area, dorsal part, layer 5	2/301	0.997219	0.99999	0	0	0.243817	0.000678926	DNAJA1;PPT1
Cochlear nuclei	2/301	0.997219	0.99999	0	0	0.243817	0.000678926	CCL20;LCP1
Cortical amygdalar area, posterior part, medial zone, layer 1	2/301	0.997219	0.99999	0	0	0.243817	0.000678926	MARCKSL1;PKIA
Dentate nucleus	2/301	0.997219	0.99999	0	0	0.243817	0.000678926	CCL20;DBI
Dorsal peduncular area, layer 2/3	2/301	0.997219	0.99999	0	0	0.243817	0.000678926	SOX11;VAMP2
Ectorhinal area	2/301	0.997219	0.99999	0	0	0.243817	0.000678926	PLIN2;RPS27A
Ectorhinal area/Layer 6a	2/301	0.997219	0.99999	0	0	0.243817	0.000678926	PLAUR;PLIN2
Entorhinal area	2/301	0.997219	0.99999	0	0	0.243817	0.000678926	CDH2;PLIN2
Entorhinal area, lateral part	2/301	0.997219	0.99999	0	0	0.243817	0.000678926	CDH2;PLIN2
Entorhinal area, lateral part, layer 3	2/301	0.997219	0.99999	0	0	0.243817	0.000678926	CDH2;PLIN2
Entorhinal area, lateral part, layer 5	2/301	0.997219	0.99999	0	0	0.243817	0.000678926	CDH2;PLIN2
Entorhinal area, medial part, dorsal zone	2/301	0.997219	0.99999	0	0	0.243817	0.000678926	TMEFF1;CDH2
Entorhinal area, medial part, dorsal zone, layer 2	2/301	0.997219	0.99999	0	0	0.243817	0.000678926	TMEFF1;FABP5
Entorhinal area, medial part, ventral zone	2/301	0.997219	0.99999	0	0	0.243817	0.000678926	PKIA;ZC3H8
Entorhinal area, medial part, ventral zone, layer 2	2/301	0.997219	0.99999	0	0	0.243817	0.000678926	TSC22D1;HDGF
External cuneate nucleus	2/301	0.997219	0.99999	0	0	0.243817	0.000678926	IL1B;VIM
Field CA2, stratum pyramidale	2/301	0.997219	0.99999	0	0	0.243817	0.000678926	ZBTB20;PLXNA1
Frontal pole, layer 2/3	2/301	0.997219	0.99999	0	0	0.243817	0.000678926	IL1RN;SOX4
Gustatory areas, layer 1	2/301	0.997219	0.99999	0	0	0.243817	0.000678926	B2M;YWHAZ
Gustatory areas, layer 4	2/301	0.997219	0.99999	0	0	0.243817	0.000678926	PLAUR;PTN
Inferior colliculus, central nucleus	2/301	0.997219	0.99999	0	0	0.243817	0.000678926	HAS2;PLXNA1
Inferior colliculus, dorsal nucleus	2/301	0.997219	0.99999	0	0	0.243817	0.000678926	NEUROG2;SMARCA4
Inferior colliculus, external nucleus	2/301	0.997219	0.99999	0	0	0.243817	0.000678926	S100A6;HAS2
Islands of Calleja	2/301	0.997219	0.99999	0	0	0.243817	0.000678926	CXCL10;NRG4
Koelliker-Fuse subnucleus	2/301	0.997219	0.99999	0	0	0.243817	0.000678926	LGALS1;HAS2
Lateral amygdalar nucleus	2/301	0.997219	0.99999	0	0	0.243817	0.000678926	IL1B;DBI
Lateral reticular nucleus, parvicellular part	2/301	0.997219	0.99999	0	0	0.243817	0.000678926	TRIM28;IL1B
Lateral vestibular nucleus	2/301	0.997219	0.99999	0	0	0.243817	0.000678926	CAPRIN1;SOX11
Magnocellular reticular nucleus	2/301	0.997219	0.99999	0	0	0.243817	0.000678926	TOP2A;IL1B
Medulla, motor related	2/301	0.997219	0.99999	0	0	0.243817	0.000678926	ACLY;LGALS1
Midbrain reticular nucleus	2/301	0.997219	0.99999	0	0	0.243817	0.000678926	PPM1N;SNCG
Motor nucleus of trigeminal	2/301	0.997219	0.99999	0	0	0.243817	0.000678926	LGALS1;MSN
Nucleus ambiguus, dorsal division	2/301	0.997219	0.99999	0	0	0.243817	0.000678926	CXCL10;EIF4B
Nucleus of the lateral olfactory tract, molecular layer	2/301	0.997219	0.99999	0	0	0.243817	0.000678926	ACAP3;MARCKSL1
Nucleus of the solitary tract, gelatinous part	2/301	0.997219	0.99999	0	0	0.243817	0.000678926	TAGLN2;PLIN2
Nucleus x	2/301	0.997219	0.99999	0	0	0.243817	0.000678926	CAPRIN1;ZC3H8
Olfactory tubercle, polymorph layer	2/301	0.997219	0.99999	0	0	0.243817	0.000678926	TSC22D1;YBX1
Paraflocculus	2/301	0.997219	0.99999	0	0	0.243817	0.000678926	BTG1;LCP1
Parasubthalamic nucleus	2/301	0.997219	0.99999	0	0	0.243817	0.000678926	GNG2;FABP5
Parvicellular reticular nucleus	2/301	0.997219	0.99999	0	0	0.243817	0.000678926	SOX11;EIF4B
Piriform area, molecular layer	2/301	0.997219	0.99999	0	0	0.243817	0.000678926	STMN2;PTN
Pons	2/301	0.997219	0.99999	0	0	0.243817	0.000678926	SPP1;HSPG2
Pons, motor related	2/301	0.997219	0.99999	0	0	0.243817	0.000678926	SPP1;HMGA1
Pontine gray	2/301	0.997219	0.99999	0	0	0.243817	0.000678926	SPP1;TIMP1
Posterolateral visual area, layer 1	2/301	0.997219	0.99999	0	0	0.243817	0.000678926	PLIN2;DUSP6
Postpiriform transition area	2/301	0.997219	0.99999	0	0	0.243817	0.000678926	RPS7;PLAUR
Postpiriform transition area, layers 3	2/301	0.997219	0.99999	0	0	0.243817	0.000678926	MARCKSL1;PLAUR
Postsubiculum, layer 2	2/301	0.997219	0.99999	0	0	0.243817	0.000678926	IFITM3;TRIB2
Prelimbic area, layer 2	2/301	0.997219	0.99999	0	0	0.243817	0.000678926	IL1RN;PPT1
Primary somatosensory area, mouth, layer 1	2/301	0.997219	0.99999	0	0	0.243817	0.000678926	MLLT3;YWHAZ
Primary somatosensory area, trunk, layer 1	2/301	0.997219	0.99999	0	0	0.243817	0.000678926	TRIM28;ENC1
Primary somatosensory area, unassigned, layer 2/3	2/301	0.997219	0.99999	0	0	0.243817	0.000678926	TNRC18;B2M
Primary somatosensory area, upper limb	2/301	0.997219	0.99999	0	0	0.243817	0.000678926	ACAP3;MLLT3
Principal sensory nucleus of the trigeminal	2/301	0.997219	0.99999	0	0	0.243817	0.000678926	LGALS1;LSS
Retrosplenial area, dorsal part, layer 1	2/301	0.997219	0.99999	0	0	0.243817	0.000678926	PPM1N;SMARCA4
Retrosplenial area, ventral part, layer 1	2/301	0.997219	0.99999	0	0	0.243817	0.000678926	MMP14;SMARCA4
Retrosplenial area, ventral part, layer 5	2/301	0.997219	0.99999	0	0	0.243817	0.000678926	MLLT3;SMARCA4
Secondary motor area	2/301	0.997219	0.99999	0	0	0.243817	0.000678926	SH3BGRL3;SMARCA4
Secondary motor area, layer 2/3	2/301	0.997219	0.99999	0	0	0.243817	0.000678926	ENC1;SMARCA4
Septohippocampal nucleus	2/301	0.997219	0.99999	0	0	0.243817	0.000678926	SOX2;SYT4
Spinal nucleus of the trigeminal, oral part, caudal dorsomedial part	2/301	0.997219	0.99999	0	0	0.243817	0.000678926	WBSCR22;EIF4B
Spinal nucleus of the trigeminal, oral part, ventrolateral part	2/301	0.997219	0.99999	0	0	0.243817	0.000678926	LGALS1;LAPTM5
Striatum ventral region	2/301	0.997219	0.99999	0	0	0.243817	0.000678926	ALCAM;ID4
Substantia innominata	2/301	0.997219	0.99999	0	0	0.243817	0.000678926	VAMP2;AP2M1
Superior vestibular nucleus	2/301	0.997219	0.99999	0	0	0.243817	0.000678926	LGALS1;SPP1
Supramammillary nucleus	2/301	0.997219	0.99999	0	0	0.243817	0.000678926	CXCL10;DNER
Tuberomammillary nucleus, ventral part	2/301	0.997219	0.99999	0	0	0.243817	0.000678926	TRIM28;RPL12
alar part of terminal hypothalamus	2/301	0.997219	0.99999	0	0	0.243817	0.000678926	IFITM3;PEG10
alar plate of m1	2/301	0.997219	0.99999	0	0	0.243817	0.000678926	S100A6;RPL27
anterior part of Int	2/301	0.997219	0.99999	0	0	0.243817	0.000678926	BTG1;PBX1
basolateral amygdaloid nucleus, posterior part	2/301	0.997219	0.99999	0	0	0.243817	0.000678926	NR2F1;PLAUR
central layers of TG	2/301	0.997219	0.99999	0	0	0.243817	0.000678926	TRIM28;RPL27
central nucleus of the inferior colliculus	2/301	0.997219	0.99999	0	0	0.243817	0.000678926	HAS2;PLXNA1
collicular (rostral) midbrain tectum	2/301	0.997219	0.99999	0	0	0.243817	0.000678926	S100A6;RPL27
corticoid layer of TuStr	2/301	0.997219	0.99999	0	0	0.243817	0.000678926	ID4;YBX1
dorsal cortical nucleus of inferior colliculus	2/301	0.997219	0.99999	0	0	0.243817	0.000678926	NEUROG2;SMARCA4
dorsal nucleus of the lateral lemniscus	2/301	0.997219	0.99999	0	0	0.243817	0.000678926	CFL1;S100A6
dorsolateral part of m1A	2/301	0.997219	0.99999	0	0	0.243817	0.000678926	S100A6;RPL27
dorsolateral part of m2A	2/301	0.997219	0.99999	0	0	0.243817	0.000678926	S100A6;TAGLN2
entorhinal cortex	2/301	0.997219	0.99999	0	0	0.243817	0.000678926	CDH2;PLIN2
episupraoptic nucleus	2/301	0.997219	0.99999	0	0	0.243817	0.000678926	IL1B;S100A6
intermediate (interpositus) cerebellar nucleus	2/301	0.997219	0.99999	0	0	0.243817	0.000678926	ITGB2;PBX1
intermediate part of isB	2/301	0.997219	0.99999	0	0	0.243817	0.000678926	RPL12;SNCG
intermediate part of r2B	2/301	0.997219	0.99999	0	0	0.243817	0.000678926	SPP1;AGRN
intermediate part of r3B	2/301	0.997219	0.99999	0	0	0.243817	0.000678926	SPP1;AGRN
intermediate part of r4B	2/301	0.997219	0.99999	0	0	0.243817	0.000678926	SPP1;AGRN
intermediate part of r6B	2/301	0.997219	0.99999	0	0	0.243817	0.000678926	IL1B;SNCG
intermediate part of r8B	2/301	0.997219	0.99999	0	0	0.243817	0.000678926	TOP2A;SNCG
intermediate stratum of IC	2/301	0.997219	0.99999	0	0	0.243817	0.000678926	HAS2;PLXNA1
intermediate stratum of Ist	2/301	0.997219	0.99999	0	0	0.243817	0.000678926	CFL1;S100A6
intermediate stratum of JcPV	2/301	0.997219	0.99999	0	0	0.243817	0.000678926	PPM1N;NSG1
intermediate stratum of Pal	2/301	0.997219	0.99999	0	0	0.243817	0.000678926	TTYH1;PBX1
intermediate stratum of SC	2/301	0.997219	0.99999	0	0	0.243817	0.000678926	S100A6;RPL27
intermediate stratum of TG	2/301	0.997219	0.99999	0	0	0.243817	0.000678926	TRIM28;RPL27
intermediate stratum of isLim	2/301	0.997219	0.99999	0	0	0.243817	0.000678926	RPS20;TIMP1
intermediate stratum of m1AL	2/301	0.997219	0.99999	0	0	0.243817	0.000678926	TOP2A;S100A6
intermediate stratum of m1Lim	2/301	0.997219	0.99999	0	0	0.243817	0.000678926	ITGB2;YWHAZ
intermediate stratum of m2Lim	2/301	0.997219	0.99999	0	0	0.243817	0.000678926	ITGB2;TIMP1
intermediate stratum of p2Lim	2/301	0.997219	0.99999	0	0	0.243817	0.000678926	RGS16;HAS2
intermediate stratum of r1Tr	2/301	0.997219	0.99999	0	0	0.243817	0.000678926	RPS18;RPS20
intermediate stratum of r2Lim	2/301	0.997219	0.99999	0	0	0.243817	0.000678926	MSN;LCP1
intermediate stratum of r2Ve	2/301	0.997219	0.99999	0	0	0.243817	0.000678926	LGALS1;SPP1
intermediate stratum of r3Lim	2/301	0.997219	0.99999	0	0	0.243817	0.000678926	CAPRIN1;LCP1
intermediate stratum of r3Ve	2/301	0.997219	0.99999	0	0	0.243817	0.000678926	CAPRIN1;SOX11
intermediate stratum of r4BI	2/301	0.997219	0.99999	0	0	0.243817	0.000678926	SPP1;AGRN
intermediate stratum of r4BL	2/301	0.997219	0.99999	0	0	0.243817	0.000678926	SPP1;MMP9
intermediate stratum of r4Ve	2/301	0.997219	0.99999	0	0	0.243817	0.000678926	CAPRIN1;SOX11
intermediate stratum of r5BM	2/301	0.997219	0.99999	0	0	0.243817	0.000678926	SPP1;HSPG2
intermediate stratum of r5Tr	2/301	0.997219	0.99999	0	0	0.243817	0.000678926	GPC2;RPL37
intermediate stratum of r5Ve	2/301	0.997219	0.99999	0	0	0.243817	0.000678926	SOX11;SEPT2
intermediate stratum of r6BI	2/301	0.997219	0.99999	0	0	0.243817	0.000678926	SYT4;SNCG
intermediate stratum of r7BI	2/301	0.997219	0.99999	0	0	0.243817	0.000678926	SNCG;FGFBP3
intermediate stratum of r7BL	2/301	0.997219	0.99999	0	0	0.243817	0.000678926	NRG4;ZMPSTE24
intermediate stratum of r7BM	2/301	0.997219	0.99999	0	0	0.243817	0.000678926	SNCG;SNX22
intermediate stratum of r8BI	2/301	0.997219	0.99999	0	0	0.243817	0.000678926	TOP2A;SNCG
intermediate stratum of r8Ve	2/301	0.997219	0.99999	0	0	0.243817	0.000678926	EBF3;YWHAZ
intermediate stratum of r9BI	2/301	0.997219	0.99999	0	0	0.243817	0.000678926	TOP2A;SNCG
intermediate white layer of SC	2/301	0.997219	0.99999	0	0	0.243817	0.000678926	RPL27;MAP4K4
isthmus proper	2/301	0.997219	0.99999	0	0	0.243817	0.000678926	S100A6;RPS20
lateral part of alar m1	2/301	0.997219	0.99999	0	0	0.243817	0.000678926	HAS2;EBF3
lateral part of r7B	2/301	0.997219	0.99999	0	0	0.243817	0.000678926	NRG4;ZMPSTE24
lateral terminal nucleus of the accessory optic tract, ventral part	2/301	0.997219	0.99999	0	0	0.243817	0.000678926	TIMP1;AP2M1
lateral tuberal nucleus	2/301	0.997219	0.99999	0	0	0.243817	0.000678926	MARCKSL1;ZC3H8
layer 1 of CCx	2/301	0.997219	0.99999	0	0	0.243817	0.000678926	MMP14;SMARCA4
layer 1 of InsCx	2/301	0.997219	0.99999	0	0	0.243817	0.000678926	LAPTM5;PLAUR
layer 1 of LOT	2/301	0.997219	0.99999	0	0	0.243817	0.000678926	ACAP3;MARCKSL1
layer 1 of LPrP cortex	2/301	0.997219	0.99999	0	0	0.243817	0.000678926	LAPTM5;PTN
layer 1 of RSC	2/301	0.997219	0.99999	0	0	0.243817	0.000678926	TNFAIP2;PLIN2
layer 2 of CCx	2/301	0.997219	0.99999	0	0	0.243817	0.000678926	IFITM3;MMP14
layer 2 of ERCx	2/301	0.997219	0.99999	0	0	0.243817	0.000678926	TMEFF1;PLIN2
layer 2 of LPrP cortex	2/301	0.997219	0.99999	0	0	0.243817	0.000678926	ACTR2;PTN
layer 2 of PCx	2/301	0.997219	0.99999	0	0	0.243817	0.000678926	ENC1;DUSP6
layer 3 of ERCx	2/301	0.997219	0.99999	0	0	0.243817	0.000678926	CDH2;PLIN2
layer 3 of PaS	2/301	0.997219	0.99999	0	0	0.243817	0.000678926	TRIB2;VAMP2
layer 4 of ERCx	2/301	0.997219	0.99999	0	0	0.243817	0.000678926	CDH2;PLIN2
layer 6 of PrS	2/301	0.997219	0.99999	0	0	0.243817	0.000678926	TMEFF1;TRIB2
layer 6a of PrS	2/301	0.997219	0.99999	0	0	0.243817	0.000678926	TMEFF1;TRIB2
liminal part of alar p1	2/301	0.997219	0.99999	0	0	0.243817	0.000678926	RPL24;EBF3
liminal part of the r9 alar plate	2/301	0.997219	0.99999	0	0	0.243817	0.000678926	ACLY;LGALS1
liminal reticular formation of m2	2/301	0.997219	0.99999	0	0	0.243817	0.000678926	IFITM3;ITGB2
m1Lim part of the midbrain reticular formation	2/301	0.997219	0.99999	0	0	0.243817	0.000678926	ITGB2;YWHAZ
mantle zone of ERCx	2/301	0.997219	0.99999	0	0	0.243817	0.000678926	CDH2;PLIN2
mantle zone of Ist	2/301	0.997219	0.99999	0	0	0.243817	0.000678926	S100A6;RPS20
mantle zone of S	2/301	0.997219	0.99999	0	0	0.243817	0.000678926	TMEFF1;YWHAB
mantle zone of isBI	2/301	0.997219	0.99999	0	0	0.243817	0.000678926	RPL12;SNCG
mantle zone of m1AL	2/301	0.997219	0.99999	0	0	0.243817	0.000678926	HAS2;EBF3
mantle zone of m2ADL	2/301	0.997219	0.99999	0	0	0.243817	0.000678926	S100A6;TAGLN2
mantle zone of p1Lim	2/301	0.997219	0.99999	0	0	0.243817	0.000678926	RPL24;EBF3
mantle zone of r2BI	2/301	0.997219	0.99999	0	0	0.243817	0.000678926	SPP1;AGRN
mantle zone of r2Ve	2/301	0.997219	0.99999	0	0	0.243817	0.000678926	LGALS1;SPP1
mantle zone of r3BI	2/301	0.997219	0.99999	0	0	0.243817	0.000678926	SPP1;AGRN
mantle zone of r3Co	2/301	0.997219	0.99999	0	0	0.243817	0.000678926	IGFBP2;WLS
mantle zone of r4BM	2/301	0.997219	0.99999	0	0	0.243817	0.000678926	STXBP1;SPP1
mantle zone of r5BM	2/301	0.997219	0.99999	0	0	0.243817	0.000678926	SPP1;HSPG2
mantle zone of r5Co	2/301	0.997219	0.99999	0	0	0.243817	0.000678926	IFITM3;WLS
mantle zone of r6BI	2/301	0.997219	0.99999	0	0	0.243817	0.000678926	IL1B;SNCG
mantle zone of r7BL	2/301	0.997219	0.99999	0	0	0.243817	0.000678926	NRG4;ZMPSTE24
mantle zone of r7BM	2/301	0.997219	0.99999	0	0	0.243817	0.000678926	SNCG;SNX22
mantle zone of r7Tr	2/301	0.997219	0.99999	0	0	0.243817	0.000678926	TAGLN2;EIF4B
mantle zone of r8BI	2/301	0.997219	0.99999	0	0	0.243817	0.000678926	TOP2A;SNCG
mantle zone of r8Ve	2/301	0.997219	0.99999	0	0	0.243817	0.000678926	EBF3;YWHAZ
mantle zone of r9Lim	2/301	0.997219	0.99999	0	0	0.243817	0.000678926	ACLY;LGALS1
mantle zone of r9Tr	2/301	0.997219	0.99999	0	0	0.243817	0.000678926	TAGLN2;EIF4B
medial part of r4B	2/301	0.997219	0.99999	0	0	0.243817	0.000678926	STXBP1;SPP1
medial part of r5B	2/301	0.997219	0.99999	0	0	0.243817	0.000678926	SPP1;HSPG2
medial part of r7B	2/301	0.997219	0.99999	0	0	0.243817	0.000678926	SNCG;SNX22
medullary hindbrain (medulla)	2/301	0.997219	0.99999	0	0	0.243817	0.000678926	TOP2A;SNX22
mesomere 1	2/301	0.997219	0.99999	0	0	0.243817	0.000678926	S100A6;RPL27
microcellular tegmental nucleus	2/301	0.997219	0.99999	0	0	0.243817	0.000678926	MMP14;ITGB2
pallidal islands of Calleja	2/301	0.997219	0.99999	0	0	0.243817	0.000678926	PABPC4;RPS13
parasubthalamic nucleus (migrated)	2/301	0.997219	0.99999	0	0	0.243817	0.000678926	PABPC4;ZC3H8
periventricular stratum of r2Ve	2/301	0.997219	0.99999	0	0	0.243817	0.000678926	HNRNPA2B1;DBI
periventricular stratum of r5Tr	2/301	0.997219	0.99999	0	0	0.243817	0.000678926	SYT4;RPS17
periventricular stratum of r6Tr	2/301	0.997219	0.99999	0	0	0.243817	0.000678926	ACLY;SYT4
periventricular stratum of r6Ve	2/301	0.997219	0.99999	0	0	0.243817	0.000678926	RPS17;ITGB2
periventricular stratum of the VAP	2/301	0.997219	0.99999	0	0	0.243817	0.000678926	NR2F1;HDGF
polymorph layer of TuPal	2/301	0.997219	0.99999	0	0	0.243817	0.000678926	TSC22D1;RPS13
pregeniculate nucleus	2/301	0.997219	0.99999	0	0	0.243817	0.000678926	RGS16;LSS
pyramidal layer of taenia tecta	2/301	0.997219	0.99999	0	0	0.243817	0.000678926	S100A4;NEUROG2
r1 part of dorsal parvicellular reticular formation	2/301	0.997219	0.99999	0	0	0.243817	0.000678926	RPS18;RPS20
r11 alar plate	2/301	0.997219	0.99999	0	0	0.243817	0.000678926	ZC3H8;TNRC18
r2 part of basointermediate reticular formation	2/301	0.997219	0.99999	0	0	0.243817	0.000678926	SPP1;AP2M1
r2 part of basolateral reticular formation	2/301	0.997219	0.99999	0	0	0.243817	0.000678926	VAT1;SNCG
r2 part of basomedial reticular formation	2/301	0.997219	0.99999	0	0	0.243817	0.000678926	SPP1;AP2M1
r2 part of nucleus subcoeruleus	2/301	0.997219	0.99999	0	0	0.243817	0.000678926	HMGA1;AGRN
r2 part of superior vestibular nucleus	2/301	0.997219	0.99999	0	0	0.243817	0.000678926	LGALS1;SPP1
r2 part of the ventral parvicellular reticular formation	2/301	0.997219	0.99999	0	0	0.243817	0.000678926	MSN;LCP1
r2 part of vestibular nucleus Y	2/301	0.997219	0.99999	0	0	0.243817	0.000678926	HNRNPA2B1;DBI
r2 part of vestibular sensory column	2/301	0.997219	0.99999	0	0	0.243817	0.000678926	LGALS1;SPP1
r3 alar plate	2/301	0.997219	0.99999	0	0	0.243817	0.000678926	TTR;SPP1
r3 part of cochlear sensory column	2/301	0.997219	0.99999	0	0	0.243817	0.000678926	IGFBP2;WLS
r3 part of lateral vestibular nucleus	2/301	0.997219	0.99999	0	0	0.243817	0.000678926	TTR;SOX11
r3 part of magnocellular medial vestibular nucleus	2/301	0.997219	0.99999	0	0	0.243817	0.000678926	CAPRIN1;SOX11
r3 part of ventral parvicellular reticular formation	2/301	0.997219	0.99999	0	0	0.243817	0.000678926	CAPRIN1;LCP1
r4 alar plate	2/301	0.997219	0.99999	0	0	0.243817	0.000678926	TTR;HNRNPA2B1
r4 part of basointermediate reticular formation	2/301	0.997219	0.99999	0	0	0.243817	0.000678926	SPP1;AGRN
r4 part of basolateral reticular formation	2/301	0.997219	0.99999	0	0	0.243817	0.000678926	SPP1;MMP9
r4 part of magnocellular medial vestibular nucleus	2/301	0.997219	0.99999	0	0	0.243817	0.000678926	CAPRIN1;SOX11
r4 part of medial pontine nuclei	2/301	0.997219	0.99999	0	0	0.243817	0.000678926	SPP1;YWHAZ
r4 part of pontine raphe cell population	2/301	0.997219	0.99999	0	0	0.243817	0.000678926	SPP1;ZMPSTE24
r5 (gustatory) part of solitary complex	2/301	0.997219	0.99999	0	0	0.243817	0.000678926	SYT4;RPS17
r5 basal plate	2/301	0.997219	0.99999	0	0	0.243817	0.000678926	SPP1;HSPG2
r5 part of dorsal parvicellular reticular formation	2/301	0.997219	0.99999	0	0	0.243817	0.000678926	GPC2;RPL37
r5 part of magnocellular medial vestibular nucleus	2/301	0.997219	0.99999	0	0	0.243817	0.000678926	SOX11;SEPT2
r5 part of the cochlear column	2/301	0.997219	0.99999	0	0	0.243817	0.000678926	IFITM3;WLS
r5 part of the oral Sp5 subnucleus	2/301	0.997219	0.99999	0	0	0.243817	0.000678926	HNRNPA2B1;LAPTM5
r6 (gustatory) part of solitary complex	2/301	0.997219	0.99999	0	0	0.243817	0.000678926	ACLY;SYT4
r6 part of basointermediate reticular formation	2/301	0.997219	0.99999	0	0	0.243817	0.000678926	SYT4;SNCG
r6 part of dorsal parvicellular reticular formation	2/301	0.997219	0.99999	0	0	0.243817	0.000678926	SOX11;EIF4B
r6 part of gigantocellular reticular area	2/301	0.997219	0.99999	0	0	0.243817	0.000678926	SYT4;FABP5
r6 part of parvocellular medial vestibular nucleus	2/301	0.997219	0.99999	0	0	0.243817	0.000678926	RPS17;ITGB2
r6 part of rostral ventromedial reticular area	2/301	0.997219	0.99999	0	0	0.243817	0.000678926	NRG4;IL1B
r7 basal plate	2/301	0.997219	0.99999	0	0	0.243817	0.000678926	SNCG;SNX22
r7 part of basolateral reticular formation	2/301	0.997219	0.99999	0	0	0.243817	0.000678926	NRG4;ZMPSTE24
r7 part of gigantocellular reticular area	2/301	0.997219	0.99999	0	0	0.243817	0.000678926	SNCG;SNX22
r7 part of the basointermediate reticular formation	2/301	0.997219	0.99999	0	0	0.243817	0.000678926	SNCG;FGFBP3
r7 part of the trigeminal column	2/301	0.997219	0.99999	0	0	0.243817	0.000678926	TAGLN2;EIF4B
r8 basal plate	2/301	0.997219	0.99999	0	0	0.243817	0.000678926	TOP2A;SNX22
r8 part of basointermediate reticular formation	2/301	0.997219	0.99999	0	0	0.243817	0.000678926	TOP2A;SNCG
r8 part of gigantocellular reticular area	2/301	0.997219	0.99999	0	0	0.243817	0.000678926	SNCG;SNX22
r8 part of inferior olive	2/301	0.997219	0.99999	0	0	0.243817	0.000678926	RPL27;PBX1
r8 part of spinal vestibular nucleus	2/301	0.997219	0.99999	0	0	0.243817	0.000678926	EBF3;YWHAZ
r8 part of the vestibular column	2/301	0.997219	0.99999	0	0	0.243817	0.000678926	EBF3;YWHAZ
r9 part of basointermediate reticular formation	2/301	0.997219	0.99999	0	0	0.243817	0.000678926	TOP2A;SNCG
r9 part of the trigeminal column	2/301	0.997219	0.99999	0	0	0.243817	0.000678926	TAGLN2;EIF4B
reticular formation of p2Lim	2/301	0.997219	0.99999	0	0	0.243817	0.000678926	RGS16;HAS2
retropontine reticular area	2/301	0.997219	0.99999	0	0	0.243817	0.000678926	TMEFF1;HSPG2
retrosplenial cortex	2/301	0.997219	0.99999	0	0	0.243817	0.000678926	TNFAIP2;HMGCR
rhombomere 2	2/301	0.997219	0.99999	0	0	0.243817	0.000678926	LGALS1;SPP1
rhombomere 7	2/301	0.997219	0.99999	0	0	0.243817	0.000678926	NRG4;SNX22
rhombomere 8	2/301	0.997219	0.99999	0	0	0.243817	0.000678926	TOP2A;SNX22
shell of SCH	2/301	0.997219	0.99999	0	0	0.243817	0.000678926	IFITM3;MMP9
striatal part of olfactory tuberculum	2/301	0.997219	0.99999	0	0	0.243817	0.000678926	ID4;YBX1
subbrachial nucleus, caudal part	2/301	0.997219	0.99999	0	0	0.243817	0.000678926	RPL37;YWHAZ
subpretectal nucleus	2/301	0.997219	0.99999	0	0	0.243817	0.000678926	RPS15A;HNRNPA2B1
superficial stratum of CoPV	2/301	0.997219	0.99999	0	0	0.243817	0.000678926	TIMP1;AP2M1
superficial stratum of DTTh	2/301	0.997219	0.99999	0	0	0.243817	0.000678926	RGS16;MLLT3
superficial stratum of ERCx (cortical plate/marginal zone)	2/301	0.997219	0.99999	0	0	0.243817	0.000678926	CDH2;PLIN2
superficial stratum of IC	2/301	0.997219	0.99999	0	0	0.243817	0.000678926	IFITM3;S100A6
superficial stratum of ITTh	2/301	0.997219	0.99999	0	0	0.243817	0.000678926	RPL18A;RGS16
superficial stratum of Ist	2/301	0.997219	0.99999	0	0	0.243817	0.000678926	S100A6;NEUROG2
superficial stratum of LAP	2/301	0.997219	0.99999	0	0	0.243817	0.000678926	MARCKSL1;PRPH
superficial stratum of POH	2/301	0.997219	0.99999	0	0	0.243817	0.000678926	IL1B;S100A6
superficial stratum of Str	2/301	0.997219	0.99999	0	0	0.243817	0.000678926	ID4;YBX1
superficial stratum of THyB-P	2/301	0.997219	0.99999	0	0	0.243817	0.000678926	RPL12;RPS13
superficial stratum of TSPaA	2/301	0.997219	0.99999	0	0	0.243817	0.000678926	IFITM3;MMP9
superficial stratum of TTe	2/301	0.997219	0.99999	0	0	0.243817	0.000678926	S100A4;NEUROG2
superficial stratum of p3ZL	2/301	0.997219	0.99999	0	0	0.243817	0.000678926	RGS16;LSS
superficial stratum of r3Ve	2/301	0.997219	0.99999	0	0	0.243817	0.000678926	TTR;SOX11
[truncated: 153 more rows]

## Sheet: Allen Brain Atlas down
Term	Overlap	P-value	Adjusted P-value	Old P-value	Old Adjusted P-value	Odds Ratio	Combined Score	Genes
layer 1 of FCx	56/300	2.03563e-31	4.38067e-28	0	0	9.34954	660.726	APP;CD81;STMN3;ENO2;RPL6;RPL7A;TUBA1B;CHCHD2;RPS16;TUBA1A;PPP2R1A;TUBB3;KIF1A;CTSD;AP2M1;SKP1;SLC38A1;RPS7;RPS8;TMOD2;APLP1;RPL13A;SYP;EEF1A1;MYL6;SFPQ;PRKAR1A;CANX;EEF1A2;ND3;PPIA;INA;PAFAH1B1;MAGED1;ATP5A1;SEZ6L2;OAZ1;PCSK1N;RPL14;RPS27A;RPL17;RPL19;MAP4K4;KIDINS220;NSG1;EEF2;NACA;FASN;HNRNPD;GNAS;CPE;CALR;RPS24;EIF4G2;RAN;TPT1
Cerebellar cortex	50/300	9.22569e-26	9.92684e-23	0	0	8.04268	463.622	RPL5;HSP90AB1;YWHAB;COX4I1;RPL6;RPL7A;UCHL1;RPS16;DPYSL2;IDS;KIF1A;RPS11;AP2M1;SKP1;TSC22D1;RPS7;RPS8;RPL23;RPS6;MYL6;TUBB2A;VGF;RPL37A;FSCN1;EVL;PPIA;PFDN5;PFN2;RTN3;USP11;HMP19;SEZ6L2;PLD3;PGRMC1;PCSK1N;RPL15;DYNC1H1;MARCKSL1;RPL35A;L1CAM;MLLT11;RPS25;RPS28;NACA;RPL27A;TTC3;HNRNPD;RPS21;RPS24;RPS23
Cerebellum	49/300	7.4025e-25	5.31006e-22	0	0	7.83363	435.258	RPL5;COX4I1;RPL6;RPL7A;UCHL1;RPS16;DPYSL2;TRIM2;IDS;KIF1A;RPS11;AP2M1;SKP1;TSC22D1;RPS7;RPS8;RPL23;RPS6;MYL6;TUBB2A;VGF;RPL37A;FSCN1;EVL;PPIA;PFDN5;PFN2;RTN3;USP11;HMP19;SEZ6L2;PLD3;PGRMC1;PCSK1N;RPL15;DYNC1H1;MARCKSL1;RPL35A;L1CAM;MLLT11;RPS25;RPS28;NACA;RPL27A;TTC3;HNRNPD;RPS21;RPS24;RPS23
Primary motor area, Layer 1	48/300	5.78625e-24	3.113e-21	0	0	7.62698	408.094	RPL4;CD81;STMN3;SEZ6L2;OAZ1;ACTB;RPL6;RPL7A;TUBA1B;CHCHD2;RPS16;PPP2R1A;TUBB3;DPYSL3;RPL14;FLNA;RPS2;RPS27A;CTSD;RPL17;RAB6B;CLASP2;APC2;SNRPN;KIDINS220;TMOD2;APLP1;RPL13A;RPSA;SYP;NSG1;EEF2;QKI;SQLE;MORF4L1;RAB31;PRKAR1A;HNRNPH1;NACA;FASN;CANX;EEF1A2;ND3;PPIA;SQSTM1;RPS24;RAN;TPT1
OB olfactory fiber layer	47/300	4.40441e-23	1.35404e-20	0	0	7.42272	382.098	RPL10;RPLP0;STMN2;ATP2A2;CHD4;SEZ6L2;ACTB;RPL6;RPL7A;UCHL1;TUBA1B;CHCHD2;PCSK1N;RPS16;KIF5C;TRIM2;IDS;NEFL;KIF1A;RPS11;RPS27A;CTSD;RAB6B;SKP1;RPL19;HSP90AA1;RPS7;TMOD2;RPL13A;SYP;NSG1;EEF2;PGM2L1;PRRC2A;TUBB2B;TUBB2A;NACA;RPL27A;TTC3;RPS20;RPL26;MAPT;ALDOA;AGRN;RPS24;EIF4G2;PAFAH1B1
cortex of cerebellar vermis	47/300	4.40441e-23	1.35404e-20	0	0	7.42272	382.098	RPL5;RTN3;HSP90AB1;YWHAB;COX4I1;USP11;RPL6;PLD3;RPS15;UCHL1;TUBA1B;PGRMC1;PCSK1N;RPS16;GNG2;RPS19;DPYSL2;IDS;KIF1A;AP2M1;SKP1;FDFT1;MARCKSL1;JUND;TSC22D1;RPS7;RPS8;RPL23;APLP1;RPL35A;MLLT11;RPS25;MYL6;RPS28;TUBB2A;FABP5;VGF;NACA;RPL27A;TTC3;HNRNPD;EVL;RPS21;PPIA;RPS24;PFN2;RPS23
prepontine hindbrain	47/300	4.40441e-23	1.35404e-20	0	0	7.42272	382.098	RPL5;RTN3;HSP90AB1;YWHAB;USP11;HMP19;SEZ6L2;OAZ1;RPL6;PLD3;RPL7A;UCHL1;PGRMC1;PCSK1N;RPS16;DPYSL2;TRIM2;IDS;KIF1A;RPL15;AP2M1;SKP1;ACTR2;MARCKSL1;TSC22D1;RPS7;RPS8;RPL23;USP22;APLP1;MLLT11;MYL6;RPS28;TUBB2A;ARPC2;VGF;PRKAR1A;NACA;RPL27A;HNRNPD;FSCN1;EVL;PPIA;PFDN5;DBN1;PFN2;RPS23
Paramedian lobule, granular layer	46/300	3.26344e-22	7.02291e-20	0	0	7.2208	357.242	RPL5;RTN3;RPL10;COX4I1;USP11;OAZ1;RPL6;PLD3;RPS14;RPL7A;UCHL1;PGRMC1;PCSK1N;RPS16;DPYSL5;DPYSL2;TRIM2;IDS;KIF1A;RPS11;AP2M1;APC2;DYNC1H1;MARCKSL1;KIDINS220;RPS8;RPL23;TMOD2;RPS6;RPL35A;L1CAM;LSS;TMEFF1;RPS28;TUBB2A;VGF;RPL27A;TTC3;RPL37A;RPL24;EVL;PPIA;PFDN5;RPS24;PFN2;RPS23
molecular layer of CbVCx	46/300	3.26344e-22	7.02291e-20	0	0	7.2208	357.242	RPL5;RTN3;HSP90AB1;COX4I1;RPL6;PLD3;RPS15;UCHL1;TUBA1B;PGRMC1;PCSK1N;GNG2;RPS19;PPP2R1A;DPYSL2;IDS;KIF1A;AP2M1;SKP1;FDFT1;DYNC1H1;MARCKSL1;JUND;TSC22D1;RPS7;RPS8;RPL23;APLP1;RPL35A;MLLT11;RPS25;MYL6;RPS28;TUBB2A;FABP5;VGF;NACA;RPL27A;TTC3;HNRNPD;EVL;RPS21;PPIA;RPS24;PFN2;RPS23
superficial stratum of cerebellar vermis	46/300	3.26344e-22	7.02291e-20	0	0	7.2208	357.242	RPL5;RTN3;HSP90AB1;YWHAB;COX4I1;USP11;RPL6;PLD3;RPS15;UCHL1;TUBA1B;PGRMC1;PCSK1N;RPS16;GNG2;RPS19;DPYSL2;IDS;KIF1A;AP2M1;SKP1;FDFT1;MARCKSL1;TSC22D1;RPS7;RPS8;RPL23;APLP1;RPL35A;MLLT11;RPS25;MYL6;RPS28;TUBB2A;FABP5;VGF;NACA;RPL27A;TTC3;HNRNPD;EVL;RPS21;PPIA;RPS24;PFN2;RPS23
OB glomerular layer	45/300	2.35276e-21	2.66481e-19	0	0	7.02119	333.497	RPL10;YWHAB;MRFAP1;STMN3;ATP2A2;SEZ6L2;RPL6;RPS14;UCHL1;TUBA1B;PCSK1N;RPS16;KIF5C;IDS;NEFL;RPS11;RPS27A;RAB6B;SKP1;RPL19;ACTR2;RPS7;KIDINS220;RPS8;RPS6;RPL13A;NMNAT2;NSG1;EEF2;PGM2L1;PRRC2A;RPS25;TMEFF1;TUBB2A;NACA;RPL27A;TTC3;RPS20;RPL26;AGRN;RPS24;RAN;TPT1;RPS23;PAFAH1B1
Paramedian lobule	45/300	2.35276e-21	2.66481e-19	0	0	7.02119	333.497	RPL5;RTN3;RPL10;COX4I1;USP11;OAZ1;RPL6;PLD3;RPS14;RPL7A;UCHL1;PCSK1N;RPS16;DPYSL5;DPYSL2;TRIM2;IDS;KIF1A;RPS11;AP2M1;APC2;DYNC1H1;MARCKSL1;KIDINS220;RPS8;RPL23;TMOD2;RPS6;RPL35A;L1CAM;TMEFF1;RPS28;TUBB2A;VGF;NACA;RPL27A;TTC3;RPL37A;FSCN1;RPL24;EVL;PPIA;PFDN5;PFN2;RPS23
cerebellar hemisphere	45/300	2.35276e-21	2.66481e-19	0	0	7.02119	333.497	RPL5;RAB3C;RTN3;RPL10;COX4I1;USP11;HMP19;SEZ6L2;OAZ1;RPL6;PLD3;RPL7A;UCHL1;PGRMC1;PCSK1N;RPS16;DPYSL5;DPYSL2;IDS;KIF1A;RPL15;RPS11;AP2M1;MARCKSL1;TSC22D1;KIDINS220;RPS8;RPL23;RPS6;RPL35A;HN1;L1CAM;RPS28;TUBB2A;VGF;RPL27A;TTC3;RPL37A;FSCN1;EVL;PPIA;PFDN5;RAN;PFN2;RPS23
internal granular layer of CbVCx	45/300	2.35276e-21	2.66481e-19	0	0	7.02119	333.497	RPL5;RTN3;HSP90AB1;COX4I1;USP11;RPL6;PLD3;RPS15;UCHL1;TUBA1B;PGRMC1;PCSK1N;RPS16;GNG2;RPS19;DPYSL2;IDS;AP2M1;SKP1;FDFT1;MARCKSL1;JUND;TSC22D1;RPS7;RPS8;RPL23;APLP1;RPL35A;MLLT11;RPS25;MYL6;RPS28;TUBB2A;FABP5;VGF;NACA;RPL27A;TTC3;HNRNPD;EVL;RPS21;PPIA;RPS24;PFN2;RPS23
mantle zone of CbH	45/300	2.35276e-21	2.66481e-19	0	0	7.02119	333.497	RPL5;RAB3C;RTN3;RPL10;COX4I1;USP11;HMP19;SEZ6L2;OAZ1;RPL6;PLD3;RPL7A;UCHL1;PGRMC1;PCSK1N;RPS16;DPYSL5;DPYSL2;IDS;KIF1A;RPL15;RPS11;AP2M1;MARCKSL1;TSC22D1;KIDINS220;RPS8;RPL23;RPS6;RPL35A;HN1;L1CAM;RPS28;TUBB2A;VGF;RPL27A;TTC3;RPL37A;FSCN1;EVL;PPIA;PFDN5;RAN;PFN2;RPS23
mantle zone of cerebellar vermis	45/300	2.35276e-21	2.66481e-19	0	0	7.02119	333.497	RPL5;RTN3;HSP90AB1;YWHAB;USP11;RPL6;PLD3;RPS15;UCHL1;TUBA1B;PGRMC1;PCSK1N;RPS16;GNG2;RPS19;DPYSL2;IDS;KIF1A;AP2M1;SKP1;FDFT1;MARCKSL1;TSC22D1;RPS7;RPS8;RPL23;APLP1;RPL35A;MLLT11;RPS25;MYL6;RPS28;TUBB2A;FABP5;VGF;NACA;RPL27A;TTC3;HNRNPD;EVL;RPS21;PPIA;RPS24;PFN2;RPS23
r1 alar plate	45/300	2.35276e-21	2.66481e-19	0	0	7.02119	333.497	RPL5;RAB3C;RTN3;RPL10;COX4I1;USP11;HMP19;SEZ6L2;OAZ1;RPL6;PLD3;RPL7A;UCHL1;PGRMC1;PCSK1N;RPS16;DPYSL2;IDS;KIF1A;RPL15;RPS11;AP2M1;MARCKSL1;TSC22D1;KIDINS220;RPS8;RPL23;RPS6;HN1;L1CAM;RPS28;TUBB2A;VGF;PRKAR1A;RPL27A;TTC3;RPL37A;FSCN1;EVL;PPIA;PFDN5;DBN1;RAN;PFN2;RPS23
rhombomere 1	45/300	2.35276e-21	2.66481e-19	0	0	7.02119	333.497	RPL5;RAB3C;RTN3;RPL10;COX4I1;USP11;HMP19;SEZ6L2;OAZ1;RPL6;PLD3;RPL7A;UCHL1;PGRMC1;PCSK1N;RPS16;DPYSL2;TRIM2;IDS;KIF1A;RPL15;RPS11;AP2M1;MARCKSL1;TSC22D1;KIDINS220;RPS8;RPL23;TMOD2;RPS6;HN1;L1CAM;RPS28;TUBB2A;VGF;PRKAR1A;RPL27A;FSCN1;EVL;PPIA;PFDN5;DBN1;RAN;PFN2;RPS23
superficial stratum of OB	45/300	2.35276e-21	2.66481e-19	0	0	7.02119	333.497	RPL10;YWHAB;STMN3;ATP2A2;SEZ6L2;RPL6;RPS14;UCHL1;TUBA1B;PCSK1N;RPS16;KIF5C;TRIM2;IDS;NEFL;KIF1A;RPS11;RPS27A;RAB6B;SKP1;RPL19;ACTR2;RPS7;KIDINS220;RPS8;TMOD2;RPS6;RPL13A;NMNAT2;NSG1;EEF2;PGM2L1;PRRC2A;RPS25;TUBB2A;NACA;RPL27A;TTC3;RPS20;RPL26;AGRN;RPS24;RAN;TPT1;PAFAH1B1
Culmen	44/300	1.6497e-20	1.26791e-18	0	0	6.82386	310.835	RPL5;RTN3;HSP90AB1;YWHAB;COX4I1;USP11;HMP19;RPL6;PLD3;RPS15;RPL7A;UCHL1;TUBA1B;PGRMC1;PCSK1N;RPS16;GNG2;RPS19;IDS;KIF1A;AP2M1;FDFT1;MARCKSL1;TSC22D1;RPS7;RPL23;APLP1;RPL35A;RPS25;MYL6;RPS28;TUBB2A;FABP5;VGF;NACA;RPL27A;TTC3;RPL37A;FSCN1;EVL;RPS21;RPS24;PFN2;RPS23
Lobules IV-V	44/300	1.6497e-20	1.26791e-18	0	0	6.82386	310.835	RPL5;RTN3;HSP90AB1;COX4I1;USP11;HMP19;RPL6;PLD3;RPS15;RPL7A;UCHL1;TUBA1B;PGRMC1;PCSK1N;RPS16;GNG2;RPS19;IDS;KIF1A;AP2M1;FDFT1;MARCKSL1;JUND;TSC22D1;RPS7;RPL23;APLP1;RPL35A;RPS25;MYL6;RPS28;TUBB2A;FABP5;VGF;NACA;RPL27A;TTC3;RPL37A;FSCN1;EVL;RPS21;RPS24;PFN2;RPS23
Paramedian lobule, molecular layer	44/300	1.6497e-20	1.26791e-18	0	0	6.82386	310.835	RPL5;RPL10;COX4I1;USP11;OAZ1;RPL6;PLD3;RPL7A;UCHL1;PCSK1N;RPS16;DPYSL5;DPYSL2;TRIM2;IDS;KIF1A;RPS11;AP2M1;APC2;DYNC1H1;MARCKSL1;TSC22D1;KIDINS220;RPS8;RPL23;RPS6;RPL35A;L1CAM;TMEFF1;MYL6;RPS28;TUBB2A;VGF;NACA;RPL27A;TTC3;RPL37A;FSCN1;RPL24;EVL;PPIA;PFDN5;PFN2;RPS23
Primary somatosensory area, lower limb, layer 1	44/300	1.6497e-20	1.26791e-18	0	0	6.82386	310.835	RPL4;HSP90AB1;MAGED1;CD81;ENO2;SEZ6L2;OAZ1;ACTB;ELAVL3;TUBA1B;CHCHD2;TUBA1A;TUBB3;PEA15;KIF5A;RPL15;RPS27A;CTSD;RPL17;DDX17;APC2;HSPA8;RPL23;TMOD2;APLP1;RPSA;SYP;QKI;SFPQ;TUBB2A;PRKAR1A;HNRNPH1;NACA;CANX;EEF1A2;SERINC1;FAU;ALDOA;ND3;PPIA;SQSTM1;GAPDH;EIF4G2;TPT1
Simple lobule	44/300	1.6497e-20	1.26791e-18	0	0	6.82386	310.835	RPL5;RTN3;USP11;HMP19;SEZ6L2;ACTB;RPL6;PLD3;RPL7A;UCHL1;PGRMC1;PCSK1N;RPS16;RPS19;DPYSL5;DPYSL2;IDS;KIF1A;RPL15;RPS11;AP2M1;APC2;MARCKSL1;RPS8;RPL23;APLP1;RPS6;L1CAM;RPS25;RPS28;TUBB2A;VGF;RPL27A;TTC3;RPL37A;FSCN1;FXYD6;EVL;RPS21;PPIA;PFDN5;RPS24;PFN2;RPS23
Simple lobule, molecular layer	44/300	1.6497e-20	1.26791e-18	0	0	6.82386	310.835	RPL5;RTN3;USP11;HMP19;SEZ6L2;ACTB;RPL6;PLD3;RPL7A;UCHL1;PGRMC1;PCSK1N;RPS16;RPS19;DPYSL5;DPYSL2;IDS;KIF1A;RPL15;RPS11;AP2M1;APC2;MARCKSL1;RPS8;RPL23;APLP1;RPS6;L1CAM;RPS28;TUBB2A;VGF;RPL27A;TTC3;RPL37A;FSCN1;FXYD6;EVL;FAU;RPS21;PPIA;PFDN5;RPS24;PFN2;RPS23
cerebellar vermis	44/300	1.6497e-20	1.26791e-18	0	0	6.82386	310.835	RPL5;RTN3;HSP90AB1;USP11;RPL6;PLD3;RPS15;UCHL1;TUBA1B;PGRMC1;PCSK1N;RPS16;GNG2;RPS19;DPYSL2;IDS;KIF1A;AP2M1;SKP1;FDFT1;MARCKSL1;TSC22D1;RPS7;RPS8;RPL23;APLP1;RPL35A;MLLT11;RPS25;MYL6;RPS28;TUBB2A;FABP5;VGF;NACA;RPL27A;TTC3;HNRNPD;EVL;RPS21;PPIA;RPS24;PFN2;RPS23
molecular layer of CbHCx	44/300	1.6497e-20	1.26791e-18	0	0	6.82386	310.835	RPL5;RAB3C;RTN3;RPL10;COX4I1;USP11;HMP19;SEZ6L2;OAZ1;RPL6;PLD3;RPL7A;UCHL1;PGRMC1;PCSK1N;RPS16;DPYSL5;DPYSL2;IDS;KIF1A;RPL15;RPS11;AP2M1;APC2;DYNC1H1;MARCKSL1;RPS8;RPL23;RPS6;RPL35A;L1CAM;RPS28;TUBB2A;VGF;RPL27A;TTC3;RPL37A;FSCN1;EVL;PPIA;PFDN5;RAN;PFN2;RPS23
periventricular stratum of cerebellar vermis	44/300	1.6497e-20	1.26791e-18	0	0	6.82386	310.835	RPL5;HSP90AB1;YWHAB;USP11;RPL11;HMP19;RPL6;PLD3;RPS15;RPL7A;UCHL1;TUBA1B;PGRMC1;PCSK1N;RPS16;GNG2;RPS19;DPYSL2;TRIM2;AP2M1;SKP1;MARCKSL1;JUND;TSC22D1;RPS7;RPL23;MLLT11;RPS25;MYL6;RPS28;TUBB2A;VGF;NACA;RPL27A;TTC3;RPL37A;HNRNPD;EVL;RPL26;RPS21;PPIA;RPS24;PFN2;RPS23
Hindbrain	60/560	1.7429e-20	1.29335e-18	0	0	4.86462	221.321	RPL5;RAB3C;HSP90AB1;CELF3;HNRNPU;NUCKS1;CHD3;RPL6;RPL7A;UCHL1;RIMS3;RPS16;PEA15;KIF1A;AP2M1;DDX17;ACTR2;H2AFY;RPL23;APLP1;TMOD2;MYL6;GAP43;SFPQ;TUBB2A;PKM;VGF;IL1RAPL1;FSCN1;EVL;GAPDH;PPIA;DBN1;RTN3;RTN1;RPL10;MAGED1;USP11;RPL11;SDC3;HMP19;OAZ1;PLD3;PGRMC1;PSAP;RPS3;RPL15;BUB3;MARCKSL1;SYT1;USP22;PRRC2B;PRRC2A;MLLT11;RPL27A;HNRNPD;CPE;CTNNB1;RPS23;CDK5R1
Lobules IV-V, molecular layer	43/300	1.12449e-19	7.33305e-18	0	0	6.62879	289.226	RPL5;RTN3;HSP90AB1;YWHAB;COX4I1;USP11;HMP19;RPL6;PLD3;RPS15;RPL7A;UCHL1;TUBA1B;PGRMC1;PCSK1N;RPS16;GNG2;RPS19;IDS;KIF1A;AP2M1;FDFT1;MARCKSL1;TSC22D1;RPS7;RPL23;APLP1;RPL35A;RPS25;MYL6;RPS28;TUBB2A;FABP5;VGF;NACA;RPL27A;TTC3;FSCN1;EVL;RPS21;RPS24;PFN2;RPS23
Purkinje cell layer of CbHCx	43/300	1.12449e-19	7.33305e-18	0	0	6.62879	289.226	RPL5;RAB3C;RTN3;RPL10;COX4I1;USP11;HMP19;SEZ6L2;OAZ1;RPL6;PLD3;RPL7A;UCHL1;PGRMC1;PCSK1N;RPS16;DPYSL5;DPYSL2;IDS;KIF1A;RPL15;RPS11;AP2M1;MARCKSL1;KIDINS220;RPS8;RPL23;RPS6;RPL35A;L1CAM;RPS28;TUBB2A;VGF;RPL27A;TTC3;RPL37A;FSCN1;EVL;PPIA;PFDN5;RAN;PFN2;RPS23
r3 roof plate	43/300	1.12449e-19	7.33305e-18	0	0	6.62879	289.226	APP;PTPRS;RTN1;GDI1;RPL31;MAGED1;DCTN1;GSTP1;STMN2;ENO2;SEZ6L2;OAZ1;UCHL1;PCSK1N;TUBB3;FLNA;PIP4K2B;CKB;RPS11;RPL17;PHLDA1;RAB6B;YWHAG;RPL19;MAP4K4;PRPH;HSP90AA1;SNRPN;KIDINS220;USP22;RPL13A;SYP;NSG1;EEF1A1;MORF4L1;ILF3;TUBB2A;EEF1A2;IL1RAPL1;CPE;EVL;RPL26;SMAP2
white matter of cerebellar vermis	43/300	1.12449e-19	7.33305e-18	0	0	6.62879	289.226	RPL5;HSP90AB1;YWHAB;USP11;RPL11;HMP19;RPL6;PLD3;RPS15;RPL7A;UCHL1;TUBA1B;PGRMC1;PCSK1N;RPS16;GNG2;RPS19;DPYSL2;TRIM2;AP2M1;SKP1;MARCKSL1;TSC22D1;RPS7;RPL23;MLLT11;RPS25;MYL6;RPS28;TUBB2A;VGF;NACA;RPL27A;TTC3;RPL37A;HNRNPD;EVL;RPL26;RPS21;PPIA;RPS24;PFN2;RPS23
Lobules IV-V, granular layer	42/300	7.44776e-19	4.00689e-17	0	0	6.43593	268.643	RPL5;RTN3;COX4I1;USP11;HMP19;RPL6;PLD3;RPS15;RPL7A;UCHL1;TUBA1B;PGRMC1;PCSK1N;RPS16;GNG2;RPS19;IDS;AP2M1;FDFT1;MARCKSL1;TSC22D1;RPS7;RPL23;APLP1;RPL35A;RPS25;MYL6;RPS28;TUBB2A;FABP5;VGF;NACA;RPL27A;TTC3;RPL37A;HNRNPD;FSCN1;EVL;RPS21;RPS24;PFN2;RPS23
Paraflocculus, molecular layer	42/300	7.44776e-19	4.00689e-17	0	0	6.43593	268.643	RAB3C;COX4I1;MRFAP1;SEZ6L2;ACTB;PLD3;RPL7A;UCHL1;PCSK1N;RPS16;DPYSL5;RPS18;TUBB3;DPYSL2;TRIM2;KIF5A;IDS;KIF1A;RPL15;RPS11;SKP1;CLASP2;APC2;DYNC1H1;HSP90AA1;RPS8;RPL23;RPS6;L1CAM;PJA2;MLLT11;PRKAR1A;RPL27A;TTC3;RPL37A;RPS20;EVL;MAPT;PPIA;RAN;PFN2;RPS23
cerebellar white matter	42/300	7.44776e-19	4.00689e-17	0	0	6.43593	268.643	RPL5;RPL10;USP11;HMP19;OAZ1;RPL6;PLD3;RPL7A;UCHL1;PGRMC1;PCSK1N;RPS16;DPYSL2;TRIM2;IDS;KIF1A;RPL15;RPS11;AP2M1;TSC22D1;RPS7;KIDINS220;RPS8;RPL23;RPS6;RPL35A;HN1;L1CAM;RPS25;MYL6;RPS28;VGF;NACA;RPL27A;TTC3;EVL;RPS21;PPIA;PFDN5;DBN1;RAN;RPS23
cortex of cerebellar hemisphere	42/300	7.44776e-19	4.00689e-17	0	0	6.43593	268.643	RPL5;RAB3C;RTN3;RPL10;COX4I1;USP11;HMP19;SEZ6L2;RPL6;PLD3;RPL7A;UCHL1;PGRMC1;PCSK1N;RPS16;DPYSL5;DPYSL2;IDS;KIF1A;RPL15;RPS11;AP2M1;APC2;MARCKSL1;RPS8;RPL23;RPS6;RPL35A;L1CAM;RPS28;TUBB2A;VGF;RPL27A;TTC3;RPL37A;FSCN1;EVL;PPIA;PFDN5;RAN;PFN2;RPS23
layer 1 of PCx	42/300	7.44776e-19	4.00689e-17	0	0	6.43593	268.643	RPL4;CD81;GSTP1;ATN1;STMN3;ENO2;SEZ6L2;OAZ1;ACTB;RPL7A;TUBA1B;CHCHD2;TUBA1A;TUBB3;KIF1A;RPL15;RPS27A;CTSD;RPL17;RAB6B;DDX17;SNRPN;RPL23;TMOD2;APLP1;RPL13A;RPSA;NSG1;QKI;TUBB2B;PRKAR1A;NACA;FASN;CSDE1;CANX;EEF1A2;RPL26;ALDOA;ND3;SQSTM1;EIF4G2;TPT1
periventricular stratum of CbH	42/300	7.44776e-19	4.00689e-17	0	0	6.43593	268.643	RPL5;RPL10;USP11;HMP19;OAZ1;RPL6;PLD3;RPL7A;UCHL1;PGRMC1;PCSK1N;RPS16;DPYSL2;TRIM2;IDS;KIF1A;RPL15;RPS11;AP2M1;TSC22D1;RPS7;KIDINS220;RPS8;RPL23;RPS6;RPL35A;HN1;L1CAM;RPS25;MYL6;RPS28;VGF;NACA;RPL27A;TTC3;EVL;RPS21;PPIA;PFDN5;DBN1;RAN;RPS23
superficial stratum of cerebellar hemisphere	42/300	7.44776e-19	4.00689e-17	0	0	6.43593	268.643	RPL5;RAB3C;RTN3;RPL10;COX4I1;USP11;HMP19;SEZ6L2;RPL6;PLD3;RPL7A;UCHL1;PGRMC1;PCSK1N;RPS16;DPYSL5;DPYSL2;IDS;KIF1A;RPL15;RPS11;AP2M1;APC2;MARCKSL1;RPS8;RPL23;RPS6;RPL35A;L1CAM;RPS28;TUBB2A;VGF;RPL27A;TTC3;RPL37A;FSCN1;EVL;PPIA;PFDN5;RAN;PFN2;RPS23
Hemispheric regions	41/300	4.79064e-18	2.39755e-16	0	0	6.24526	249.06	RPL5;RAB3C;RTN3;RPL10;COX4I1;USP11;SEZ6L2;RPL6;PLD3;RPL7A;UCHL1;PGRMC1;PCSK1N;RPS16;DPYSL5;DPYSL2;IDS;KIF1A;RPL15;RPS11;AP2M1;APC2;MARCKSL1;RPS8;RPL23;RPS6;RPL35A;L1CAM;RPS28;TUBB2A;VGF;RPL27A;TTC3;RPL37A;FSCN1;EVL;PPIA;PFDN5;RAN;PFN2;RPS23
Simple lobule, granular layer	41/300	4.79064e-18	2.39755e-16	0	0	6.24526	249.06	RPL5;RTN3;USP11;HMP19;SEZ6L2;ACTB;RPL6;PLD3;RPL7A;UCHL1;PGRMC1;RPS16;RPS19;DPYSL5;DPYSL2;IDS;KIF1A;RPL15;RPS11;AP2M1;MARCKSL1;RPS8;RPL23;RPS6;HN1;L1CAM;RPS25;RPS28;TUBB2A;RPL27A;TTC3;RPL37A;FSCN1;FXYD6;EVL;RPS21;PPIA;PFDN5;RPS24;PFN2;RPS23
internal granular layer of CbHCx	41/300	4.79064e-18	2.39755e-16	0	0	6.24526	249.06	RPL5;RAB3C;RTN3;RPL10;COX4I1;USP11;HMP19;SEZ6L2;RPL6;PLD3;RPL7A;UCHL1;PGRMC1;PCSK1N;RPS16;DPYSL5;DPYSL2;IDS;KIF1A;RPL15;RPS11;AP2M1;APC2;MARCKSL1;RPS8;RPL23;RPS6;RPL35A;L1CAM;RPS28;TUBB2A;RPL27A;TTC3;RPL37A;FSCN1;EVL;PPIA;PFDN5;RAN;PFN2;RPS23
Main olfactory bulb, glomerular layer	40/300	2.9911e-17	1.36954e-15	0	0	6.05675	230.449	STMN2;STMN3;SEZ6L2;RPL6;RPS14;UCHL1;TUBA1B;PCSK1N;RPS16;ALCAM;KIF5C;IDS;NEFL;CKB;RPS11;RAB6B;AP2M1;SKP1;RPS7;KIDINS220;RPS8;RPS6;NMNAT2;NSG1;EEF2;PGM2L1;PRRC2A;TUBB2B;TUBB2A;RPL27A;RPL24;RPS20;RPL26;AGRN;SMAP2;RPS24;RAN;TPT1;RPS23;PAFAH1B1
Primary somatosensory area, barrel field, layer 1	40/300	2.9911e-17	1.36954e-15	0	0	6.05675	230.449	RPL4;CD81;GSTP1;MRFAP1;ATN1;ATP2A2;CHD4;ENO2;KLC1;OAZ1;RPL7A;CHCHD2;TUBA1A;TUBB3;DPYSL3;RPL15;RPS27A;CTSD;PHLDA1;MAP4K4;ACTR2;SLC38A1;SNRPN;RPL23;RPSA;QKI;RPS28;TUBB2B;PRKAR1A;NACA;FASN;CANX;EEF1A2;CPE;HDGF;ALDOA;ND3;GAPDH;RPS24;TPT1
Primary somatosensory area, upper limb, layer 1	40/300	2.9911e-17	1.36954e-15	0	0	6.05675	230.449	RPL4;MAGED1;CD81;ATP5A1;ENO2;SEZ6L2;KLC1;RPL6;RPL7A;TUBA1B;CHCHD2;TUBA1A;TUBB3;NCAM1;KIF1A;RPL15;RPS2;RPS27A;CTSD;RAB6B;SKP1;MAP4K4;CADM3;SNRPN;APLP1;RPL13A;RPSA;NSG1;QKI;SQLE;SFPQ;PRKAR1A;NACA;CANX;CPE;HDGF;ALDOA;ND3;SQSTM1;TPT1
Secondary motor area, layer 1	40/300	2.9911e-17	1.36954e-15	0	0	6.05675	230.449	MAGED1;CD81;STMN3;DBI;CHD4;ENO2;SEZ6L2;RPL6;ADD2;RPL7A;TUBA1B;CHCHD2;TUBA1A;TUBB3;RPL14;RPL13;KIF1A;RPS27A;CTSD;RPL17;AP2M1;MAP4K4;CADM3;RPS7;RPL23;APLP1;RPL35A;SYP;QKI;SEPT3;TUBB2A;RAB31;NACA;CANX;EEF1A2;ALDOA;ND3;RPS24;EIF4G2;TPT1
Paraflocculus	39/300	1.81176e-16	7.95694e-15	0	0	5.87037	212.784	RAB3C;COX4I1;MRFAP1;SEZ6L2;ACTB;PLD3;RPL7A;UCHL1;PCSK1N;RPS16;DPYSL5;TUBB3;DPYSL2;TRIM2;KIF5A;IDS;KIF1A;RPL15;RPS11;SKP1;CLASP2;APC2;HSP90AA1;RPS8;RPL23;RPS6;L1CAM;PJA2;PRKAR1A;RPL27A;CANX;RPL37A;RPS20;EVL;MAPT;PFDN5;RAN;PFN2;RPS23
Uvula (IX), granular layer	39/300	1.81176e-16	7.95694e-15	0	0	5.87037	212.784	RPL5;RPL11;RPL6;PLD3;ADD2;RPS15;RPL7A;TUBA1B;PCSK1N;ATCAY;RPS3;RPL35;IDS;PHLDA1;SKP1;TSC22D1;RPS8;RPL23;RPL13A;RPL35A;MLLT11;EEF1G;RPS25;RPS28;TUBB2A;FABP5;NACA;RPL27A;TTC3;GNB1;RPL37A;HNRNPD;RPL24;TMBIM6;EVL;RPS21;RPS24;PFN2;RPS23
Crus 1, molecular layer	38/300	1.06401e-15	4.16319e-14	0	0	5.68609	196.038	RPL5;RAB3C;RTN3;RPL10;USP11;SEZ6L2;RPL6;PLD3;RPL7A;UCHL1;PGRMC1;RPS16;RPS19;DPYSL5;DPYSL2;IDS;KIF1A;RPL15;AP2M1;MARCKSL1;RPS8;RPL23;RPS6;L1CAM;RPS28;TUBB2A;RPL27A;TTC3;RPL37A;FSCN1;EVL;RPS21;PPIA;PFDN5;RPS24;RAN;PFN2;RPS23
OB outer plexiform layer	38/300	1.06401e-15	4.16319e-14	0	0	5.68609	196.038	RPL10;MRFAP1;STMN3;SEZ6L2;RPL6;UCHL1;PCSK1N;RPS16;ALCAM;KIF5C;IDS;NEFL;RPS11;RAB6B;VAT1L;SKP1;RPL19;RPS7;KIDINS220;RPS8;RPS6;NMNAT2;NSG1;EEF2;PGM2L1;TMEFF1;TUBB2A;RPL27A;RPL37A;GNAS;RPL26;AGRN;SMAP2;INA;RPS24;RAN;RPS23;PAFAH1B1
Purkinje cell layer of CbVCx	38/300	1.06401e-15	4.16319e-14	0	0	5.68609	196.038	RPL5;HSP90AB1;YWHAB;RPL6;PLD3;RPS15;UCHL1;TUBA1B;PGRMC1;PCSK1N;GNG2;DPYSL2;AP2M1;SKP1;FDFT1;DYNC1H1;MARCKSL1;TSC22D1;RPS7;RPL23;APLP1;RPL35A;MLLT11;TMEFF1;MYL6;RPS28;TUBB2A;FABP5;VGF;NACA;TTC3;HNRNPD;EVL;RPS21;PPIA;EIF4G2;PFN2;RPS23
Uvula (IX)	38/300	1.06401e-15	4.16319e-14	0	0	5.68609	196.038	RPL5;RPL11;RPL6;PLD3;ADD2;RPS15;TUBA1B;PCSK1N;ATCAY;RPS3;RPL35;IDS;PHLDA1;SKP1;TSC22D1;RPS8;RPL23;NONO;RPL13A;RPL35A;MLLT11;EEF1G;RPS25;RPS28;TUBB2A;NACA;RPL27A;TTC3;GNB1;RPL37A;HNRNPD;RPL24;TMBIM6;RPS21;PFDN5;RPS24;PFN2;RPS23
Vermal regions	38/300	1.06401e-15	4.16319e-14	0	0	5.68609	196.038	RPL5;HSP90AB1;YWHAB;RPL6;PLD3;RPS15;RPL7A;UCHL1;TUBA1B;PCSK1N;GNG2;IDS;AP2M1;SKP1;FDFT1;MARCKSL1;TSC22D1;RPS7;RPL23;APLP1;RPL35A;MLLT11;RPS25;MYL6;RPS28;TUBB2A;FABP5;VGF;NACA;RPL27A;TTC3;HNRNPD;FSCN1;EVL;RPS21;RPS24;PFN2;RPS23
intermediate stratum of OB	38/300	1.06401e-15	4.16319e-14	0	0	5.68609	196.038	RPL10;MRFAP1;STMN3;SEZ6L2;RPL6;UCHL1;PCSK1N;RPS16;ALCAM;KIF5C;IDS;NEFL;RPS11;RAB6B;VAT1L;SKP1;RPL19;RPS7;KIDINS220;RPS8;RPS6;NMNAT2;NSG1;EEF2;PGM2L1;TMEFF1;TUBB2A;RPL27A;RPL37A;GNAS;RPL26;AGRN;SMAP2;INA;RPS24;RAN;RPS23;PAFAH1B1
Copula pyramidis	37/300	6.05491e-15	2.06828e-13	0	0	5.50388	180.186	RPL5;RAB3C;RTN3;RPL30;USP11;SEZ6L2;RPL6;PLD3;RPS14;UCHL1;PCSK1N;DPYSL2;IDS;RPS11;AP2M1;APC2;DYNC1H1;MARCKSL1;TSC22D1;RPL23;USP22;MYL6;TUBB2A;VGF;NACA;RPL27A;TTC3;RPL37A;HNRNPD;FSCN1;EVL;MAPT;SMAP2;RPS21;PPIA;DBN1;RPS23
Copula pyramidis, molecular layer	37/300	6.05491e-15	2.06828e-13	0	0	5.50388	180.186	RAB3C;RTN3;RPL30;COX4I1;USP11;SEZ6L2;PLD3;RPS14;UCHL1;PCSK1N;DPYSL2;IDS;BUB3;RPS11;AP2M1;APC2;DYNC1H1;MARCKSL1;TSC22D1;KIDINS220;RPS8;RPL23;USP22;MYL6;TUBB2A;VGF;NACA;RPL27A;TTC3;HNRNPD;FSCN1;EVL;MAPT;SMAP2;PPIA;DBN1;RPS23
Crus 2, molecular layer	37/300	6.05491e-15	2.06828e-13	0	0	5.50388	180.186	RPL5;RPL10;COX4I1;USP11;SEZ6L2;RPL6;PLD3;RPL7A;UCHL1;PGRMC1;RPS16;RPS19;DPYSL5;DPYSL2;IDS;KIF1A;RPL15;RPS11;AP2M1;MARCKSL1;RPS8;RPL23;RPS6;RPL35A;L1CAM;MYL6;RPS28;VGF;RPL27A;TTC3;RPL24;EVL;RPS21;PPIA;PFDN5;PFN2;RPS23
Main olfactory bulb	37/300	6.05491e-15	2.06828e-13	0	0	5.50388	180.186	RPL10;YWHAB;STMN3;SEZ6L2;RPL6;UCHL1;PCSK1N;RPS16;ALCAM;KIF5C;IDS;NEFL;KIF1A;RPS11;RAB6B;AP2M1;VAT1L;SKP1;JUND;RPS7;KIDINS220;RPS8;RPS6;NMNAT2;NSG1;EEF2;PGM2L1;TMEFF1;RPL27A;RPL24;RPL26;AGRN;RPS24;RAN;TPT1;RPS23;PAFAH1B1
Paraflocculus, granular layer	37/300	6.05491e-15	2.06828e-13	0	0	5.50388	180.186	RAB3C;CD81;COX4I1;MRFAP1;SEZ6L2;ACTB;PLD3;RPL7A;UCHL1;PCSK1N;RPS16;TUBB3;DPYSL2;TRIM2;KIF5A;IDS;RPL15;RPS11;SKP1;CLASP2;HSP90AA1;RPS8;RPL23;RPS6;L1CAM;PJA2;PRKAR1A;RPL27A;CANX;RPL37A;RPS20;EVL;MAPT;PFDN5;RAN;PFN2;RPS23
isthmic alar plate	37/300	6.05491e-15	2.06828e-13	0	0	5.50388	180.186	RPL5;RTN3;HSP90AB1;YWHAB;RPL6;PLD3;RPS15;UCHL1;TUBA1B;PCSK1N;RPS16;GNG2;RPS19;PPP2R1A;KIF1A;AP2M1;SKP1;DYNC1H1;MARCKSL1;TSC22D1;RPS7;RPL23;APLP1;MLLT11;MYL6;RPS28;TUBB2A;FABP5;VGF;NACA;RPL27A;TTC3;HNRNPD;EVL;PPIA;PFN2;RPS23
mantle zone of OB	37/300	6.05491e-15	2.06828e-13	0	0	5.50388	180.186	RPL10;YWHAB;STMN3;SEZ6L2;RPL6;UCHL1;PCSK1N;RPS16;ALCAM;KIF5C;IDS;NEFL;KIF1A;RPS11;RAB6B;AP2M1;SKP1;RPL19;RPS7;KIDINS220;RPS8;RPS6;NMNAT2;NSG1;EEF2;PGM2L1;TMEFF1;RPL27A;GNAS;RPL24;RPL26;AGRN;RPS24;RAN;TPT1;RPS23;PAFAH1B1
olfactory bulb, principal part	37/300	6.05491e-15	2.06828e-13	0	0	5.50388	180.186	RPL10;YWHAB;STMN3;SEZ6L2;RPL6;UCHL1;PCSK1N;RPS16;ALCAM;KIF5C;IDS;NEFL;KIF1A;RPS11;RAB6B;AP2M1;SKP1;RPL19;RPS7;KIDINS220;RPS8;RPS6;NMNAT2;NSG1;EEF2;PGM2L1;TMEFF1;RPL27A;GNAS;RPL24;RPL26;AGRN;RPS24;RAN;TPT1;RPS23;PAFAH1B1
Crus 1	36/300	3.3366e-14	1.0717e-12	0	0	5.32373	165.202	RPL5;RAB3C;RPL10;USP11;SEZ6L2;RPL6;PLD3;RPL7A;UCHL1;PGRMC1;RPS16;RPS19;DPYSL5;DPYSL2;IDS;KIF1A;RPL15;RPS11;AP2M1;MARCKSL1;RPS8;RPL23;RPS6;L1CAM;RPS28;RPL27A;TTC3;RPL37A;EVL;RPS21;PPIA;PFDN5;RPS24;RAN;PFN2;RPS23
Crus 2	36/300	3.3366e-14	1.0717e-12	0	0	5.32373	165.202	RPL5;RPL10;COX4I1;USP11;RPL6;PLD3;RPL7A;UCHL1;PGRMC1;RPS16;RPS19;DPYSL5;DPYSL2;IDS;KIF1A;RPL15;RPS11;AP2M1;MARCKSL1;RPS8;RPL23;RPS6;RPL35A;L1CAM;TMEFF1;RPS28;VGF;RPL27A;TTC3;RPL24;EVL;RPS21;PPIA;PFDN5;PFN2;RPS23
Primary somatosensory area, mouth, layer 1	36/300	3.3366e-14	1.0717e-12	0	0	5.32373	165.202	RPL4;APP;CD81;GSTP1;ATN1;STMN3;SEZ6L2;OAZ1;RPL6;RPL7A;CHCHD2;PPP2R1A;RPL14;RPS2;RPS11;CTSD;PHLDA1;SKP1;RPL19;SNRPN;TSC22D1;TMOD2;RPSA;QKI;MYL6;NACA;FASN;EEF1A2;RPL37A;HNRNPD;CPE;HDGF;HNRNPC;ND3;RPS24;PAFAH1B1
neural plate	36/300	3.3366e-14	1.0717e-12	0	0	5.32373	165.202	SPARC;CD81;STXBP1;STMN3;SEZ6L2;RPL6;PCSK1N;RPS16;DPYSL5;DPYSL2;KIF5A;SNCG;NCAM1;RPS11;AP2M1;VAT1L;APC2;JUND;RPS8;RPS6;RPL13A;RPL35A;EEF2;QKI;ACLY;RPS28;TUBB2A;NACA;TTC3;RPL37A;GNAS;EVL;RPL26;ND3;RPS24;RAN
Ansiform lobule	35/300	1.77927e-13	5.17431e-12	0	0	5.14559	151.061	RPL5;RPL10;USP11;SEZ6L2;RPL6;PLD3;RPL7A;UCHL1;PGRMC1;RPS16;RPS19;DPYSL5;DPYSL2;IDS;KIF1A;RPL15;RPS11;AP2M1;MARCKSL1;RPS8;RPL23;RPS6;L1CAM;MYL6;RPS28;RPL27A;TTC3;EVL;RPS21;PPIA;PFDN5;RPS24;RAN;PFN2;RPS23
Flocculus	35/300	1.77927e-13	5.17431e-12	0	0	5.14559	151.061	RAB3C;SET;RPL10;SEZ6L2;PLD3;RPL7A;RPS16;DPYSL5;RPS18;DPYSL2;IDS;RPS11;CLASP2;APC2;HSP90AA1;JUND;RPL21;KIDINS220;RPS6;L1CAM;PJA2;MLLT11;MORF4L1;TUBB2A;VGF;RPL27A;RPL37A;FSCN1;RPS20;EVL;MAPT;DBN1;RAN;RPS23;PAFAH1B1
Flocculus, molecular layer	35/300	1.77927e-13	5.17431e-12	0	0	5.14559	151.061	RAB3C;SET;RPL10;SEZ6L2;PLD3;RPL7A;RPS16;DPYSL5;RPS18;DPYSL2;IDS;RPS11;CLASP2;APC2;HSP90AA1;RPL21;KIDINS220;RPS8;RPS6;L1CAM;PJA2;MLLT11;MORF4L1;TUBB2A;VGF;RPL27A;CSDE1;RPL37A;FSCN1;EVL;MAPT;DBN1;RAN;RPS23;PAFAH1B1
Main olfactory bulb, outer plexiform layer	35/300	1.77927e-13	5.17431e-12	0	0	5.14559	151.061	RPL10;YWHAB;MRFAP1;STMN3;SEZ6L2;RPL6;RPS15;UCHL1;PCSK1N;RPS16;ALCAM;KIF5C;IDS;NEFL;RPS11;RAB6B;VAT1L;SKP1;RPS7;KIDINS220;RPS8;RPS6;NMNAT2;NSG1;EEF2;PGM2L1;TUBB2A;RPL27A;GNAS;RPL26;AGRN;RPS24;RAN;RPS23;PAFAH1B1
OB mitral cell layer	35/300	1.77927e-13	5.17431e-12	0	0	5.14559	151.061	RPL10;MRFAP1;STMN3;RPL6;UCHL1;PCSK1N;GNG2;KIF5C;IDS;NEFL;RPS11;RAB6B;VAT1L;SKP1;RPL19;RPS7;RPS8;RPS6;NMNAT2;NSG1;EEF2;PGM2L1;EEF1G;TMEFF1;RPS28;RPL27A;RPL37A;GNAS;RPL26;FAU;AGRN;RPS24;RAN;RPS23;PAFAH1B1
layer 2 of FCx	35/300	1.77927e-13	5.17431e-12	0	0	5.14559	151.061	APP;SPARC;MAGED1;CD81;ATP5A1;STMN3;ENO2;SEZ6L2;TUBA1B;CHCHD2;PCSK1N;PPP2R1A;RPL14;RPS27A;CTSD;SKP1;MAP4K4;SLC38A1;RPS7;KIDINS220;RPS8;APLP1;RPL13A;EEF2;QKI;MYL6;SFPQ;FASN;CANX;EEF1A2;GNAS;ND3;INA;RPS24;TPT1
layer 2 of PCx	35/300	1.77927e-13	5.17431e-12	0	0	5.14559	151.061	RPL4;CD81;GSTP1;ATN1;DBI;SEZ6L2;OAZ1;RPL7A;CHCHD2;TUBA1A;TUBB3;DPYSL3;NCAM1;RPL15;RPS27A;CTSD;RPL17;SLC38A1;JUND;SNRPN;RPL23;TMOD2;APLP1;RPSA;QKI;TUBB2B;PRKAR1A;NACA;FASN;CANX;EEF1A2;ALDOA;ND3;RPS24;TPT1
Crus 1, granular layer	34/300	9.17516e-13	2.49936e-11	0	0	4.96944	137.738	RPL5;RAB3C;RPL10;USP11;SEZ6L2;RPL6;PLD3;RPL7A;UCHL1;PGRMC1;RPS16;RPS19;DPYSL5;DPYSL2;IDS;KIF1A;RPS11;AP2M1;MARCKSL1;RPS8;RPL23;RPS6;L1CAM;RPS28;RPL27A;TTC3;EVL;RPS21;PPIA;PFDN5;RPS24;RAN;PFN2;RPS23
Entorhinal area, medial part, dorsal zone, layer 1	34/300	9.17516e-13	2.49936e-11	0	0	4.96944	137.738	RPL4;RPL5;HSP90AB1;GDI1;COX4I1;MRFAP1;SEZ6L2;KLC1;ACTB;RPL6;RPS14;RPL7A;CHCHD2;KIF5C;SV2A;RPL14;NCAM1;KIF3C;RPS27A;SKP1;CLASP2;CAP1;APC2;DYNC1H1;KIDINS220;RPL13A;RPSA;NSG1;ACLY;SFPQ;RPL24;MAPT;FAU;PFDN5
Primary somatosensory area, trunk, layer 1	34/300	9.17516e-13	2.49936e-11	0	0	4.96944	137.738	RPL4;HSP90AB1;CD81;GSTP1;ENO2;ACTB;TUBA1B;TUBA1A;TUBB3;NCAM1;RPL15;RPS27A;CTSD;RAB6B;DDX17;HSPA8;SNRPN;RPL23;APLP1;RPSA;NSG1;QKI;TUBB2B;NACA;CSDE1;CANX;EEF1A2;RPL26;FAU;ALDOA;ND3;SQSTM1;GAPDH;TPT1
layer 1 of ERCx	34/300	9.17516e-13	2.49936e-11	0	0	4.96944	137.738	RPL4;RPL5;NDRG4;HSP90AB1;GSTP1;COX4I1;MRFAP1;SEZ6L2;KLC1;OAZ1;ACTB;RPL6;RPL7A;KIF5C;SV2A;RPL14;NEFL;CKB;KIF3C;RPS11;SKP1;RPL19;CAP1;DYNC1H1;HSPA5;KIDINS220;RPL13A;RAB31;RPL37A;RPL24;EVL;MAPT;FAU;PFDN5
periventricular stratum of OB	34/300	9.17516e-13	2.49936e-11	0	0	4.96944	137.738	RPL4;RPL10;YWHAB;STMN3;RPL6;UCHL1;PCSK1N;ALCAM;KIF5C;NEFL;RPS11;RAB6B;VAT1L;SKP1;JUND;RPS7;RPS8;RPS6;NMNAT2;EEF2;PGM2L1;EEF1G;TMEFF1;RPS28;RPL37A;GNAS;RPL24;RPL26;FAU;AGRN;RPS21;RPS24;RPS23;PAFAH1B1
Basic cell groups and regions	33/300	4.57184e-12	1.08117e-10	0	0	4.79526	125.209	SPARC;CD81;STXBP1;STMN3;SEZ6L2;RPL6;PCSK1N;RPS16;YWHAQ;DPYSL5;DPYSL2;KIF5A;NCAM1;RPS11;AP2M1;APC2;RPS8;RPL35A;EEF2;QKI;ACLY;RPS28;TUBB2A;ARPC2;NACA;TTC3;RPL37A;GNAS;EVL;RPL26;ND3;RPS24;RAN
Copula pyramidis, granular layer	33/300	4.57184e-12	1.08117e-10	0	0	4.79526	125.209	RPL5;RAB3C;RTN3;RPL30;USP11;SEZ6L2;RPL6;PLD3;UCHL1;PCSK1N;IDS;RPS11;AP2M1;APC2;DYNC1H1;MARCKSL1;TSC22D1;RPL23;USP22;MYL6;TUBB2A;VGF;NACA;RPL27A;TTC3;RPL37A;HNRNPD;EVL;MAPT;SMAP2;RPS21;DBN1;RPS23
Crus 2, granular layer	33/300	4.57184e-12	1.08117e-10	0	0	4.79526	125.209	RPL5;RPL10;USP11;RPL6;PLD3;UCHL1;PGRMC1;RPS16;RPS19;DPYSL5;DPYSL2;IDS;KIF1A;RPS11;AP2M1;MARCKSL1;RPS8;RPL23;RPS6;RPL35A;L1CAM;TMEFF1;RPS28;VGF;RPL27A;TTC3;RPL24;EVL;RPS21;PPIA;PFDN5;PFN2;RPS23
Entorhinal area, lateral part, layer 1	33/300	4.57184e-12	1.08117e-10	0	0	4.79526	125.209	RPL4;RPL5;GSTP1;COX4I1;MRFAP1;KLC1;RPL6;RPS14;RPL7A;CHCHD2;SV2A;RPL14;NEFL;CKB;RPS10;CTSD;RPL19;VAT1;CAP1;DYNC1H1;HSPA5;KIDINS220;APLP2;ANXA5;RPL13A;NSG1;MLLT11;RAB31;RPL37A;RPL24;ALDOA;PFDN5;TPT1
Main olfactory bulb, mitral layer	33/300	4.57184e-12	1.08117e-10	0	0	4.79526	125.209	RPL4;RPL10;STMN3;RPL6;UCHL1;PCSK1N;ALCAM;GNG2;KIF5C;IDS;NEFL;KIF1A;RPS11;RAB6B;VAT1L;SKP1;RPS7;KIDINS220;RPS8;RPS6;NMNAT2;NSG1;EEF2;PGM2L1;TMEFF1;RPS28;RPL37A;RPL26;AGRN;RPS24;RAN;RPS23;PAFAH1B1
Mus musculus	33/300	4.57184e-12	1.08117e-10	0	0	4.79526	125.209	SPARC;CD81;STXBP1;STMN3;SEZ6L2;RPL6;PCSK1N;RPS16;DPYSL5;DPYSL2;KIF5A;SNCG;RPS11;AP2M1;VAT1L;APC2;RPS8;RPL13A;RPL35A;EEF2;QKI;ACLY;RPS28;TUBB2A;NACA;TTC3;RPL37A;GNAS;EVL;RPL26;ND3;RPS24;RAN
Uvula (IX), molecular layer	33/300	4.57184e-12	1.08117e-10	0	0	4.79526	125.209	RPL5;RPL11;PLD3;ADD2;RPS15;TUBA1B;ATCAY;RPS3;RPL35;IDS;PHLDA1;SKP1;TSC22D1;RPS8;RPL23;NONO;RPL13A;RPL35A;MLLT11;EEF1G;TUBB2A;NACA;RPL27A;GNB1;RPL37A;HNRNPD;RPL24;TMBIM6;RPS21;PFDN5;RPS24;PFN2;RPS23
isthmus	33/300	4.57184e-12	1.08117e-10	0	0	4.79526	125.209	RPL5;HSP90AB1;YWHAB;RPL6;PLD3;ADD2;RPS15;UCHL1;TUBA1B;RPS19;PPP2R1A;TRIM2;KIF1A;AP2M1;SKP1;ACTR2;MARCKSL1;TSC22D1;RPS7;RPL23;APLP1;MLLT11;MYL6;RPS28;TUBB2A;VGF;NACA;RPL27A;HNRNPD;EVL;PPIA;PFN2;RPS23
lateral part of r6B	33/300	4.57184e-12	1.08117e-10	0	0	4.79526	125.209	APP;HSP90AB1;GDI1;RPL10;TTYH1;DCTN1;SDC3;HNRNPU;HMP19;ENO2;RPL7;ADD2;PGRMC1;SCRN1;SV2A;PSAP;HAS2;BUB3;DDX17;HSPA8;RPL21;SYT1;APLP2;NMNAT2;PRRC2A;EEF1A1;SFPQ;SERBP1;CTNNB1;CPE;PPIA;SQSTM1;GAPDH
mantle zone of r6BL	33/300	4.57184e-12	1.08117e-10	0	0	4.79526	125.209	APP;HSP90AB1;GDI1;RPL10;TTYH1;DCTN1;SDC3;HNRNPU;HMP19;ENO2;RPL7;ADD2;PGRMC1;SCRN1;SV2A;PSAP;HAS2;BUB3;DDX17;HSPA8;RPL21;SYT1;APLP2;NMNAT2;PRRC2A;EEF1A1;SFPQ;SERBP1;CTNNB1;CPE;PPIA;SQSTM1;GAPDH
periventricular stratum of r6Co	33/300	4.57184e-12	1.08117e-10	0	0	4.79526	125.209	PTPRS;RTN1;STMN2;CHD3;KLC1;DCAF7;ADD2;RPL7A;PCSK1N;CDH2;TUBB3;ENC1;SNRPN;CADM1;KIDINS220;USP22;SYP;NSG1;LSS;PRRC2B;PJA2;MORF4L1;GAP43;RAB31;VGF;PRKAR1A;EEF1A2;IL1RAPL1;SERINC1;EVL;RPL26;MAPT;RPS23
r6 part of dorsal cochlear nucleus	33/300	4.57184e-12	1.08117e-10	0	0	4.79526	125.209	PTPRS;RTN1;STMN2;CHD3;KLC1;DCAF7;ADD2;RPL7A;PCSK1N;CDH2;TUBB3;ENC1;SNRPN;CADM1;KIDINS220;USP22;SYP;NSG1;LSS;PRRC2B;PJA2;MORF4L1;GAP43;RAB31;VGF;PRKAR1A;EEF1A2;IL1RAPL1;SERINC1;EVL;RPL26;MAPT;RPS23
Declive (VI), molecular layer	32/300	2.19954e-11	4.98253e-10	0	0	4.62301	113.45	RPL5;HSP90AB1;USP11;HMP19;RPL6;PLD3;RPS15;UCHL1;TUBA1B;RPS16;DPYSL3;IDS;KIF1A;AP2M1;FDFT1;MARCKSL1;RPS8;RPL23;RPL35A;RPS25;MYL6;RPS28;TUBB2A;FABP5;VGF;TTC3;HNRNPD;EVL;RPS21;RPS24;PFN2;RPS23
Main olfactory bulb, inner plexiform layer	32/300	2.19954e-11	4.98253e-10	0	0	4.62301	113.45	RPL10;STMN3;SEZ6L2;RPL6;RPS15;UCHL1;PCSK1N;ALCAM;GNG2;KIF5C;IDS;NEFL;RPS11;RAB6B;VAT1L;SKP1;JUND;RPS7;RPS8;RPS6;NMNAT2;NSG1;EEF2;PGM2L1;TMEFF1;GNAS;RPL26;AGRN;RPS24;RAN;RPS23;PAFAH1B1
Parasubiculum, layer 1	32/300	2.19954e-11	4.98253e-10	0	0	4.62301	113.45	RPL4;GDI1;MRFAP1;ATP2A2;KLC1;ACTB;RPL6;NGRN;RPL7A;TUBA1B;CHCHD2;TUBA1A;KIF5C;KIF5A;NCAM1;KIF3C;VAT1L;SKP1;MAP4K4;APC2;DYNC1H1;JUND;KIDINS220;APLP1;RPL13A;NSG1;MORF4L1;ACLY;PRKAR1A;CANX;MAPT;FAU
root	32/300	2.19954e-11	4.98253e-10	0	0	4.62301	113.45	SPARC;CD81;STXBP1;STMN3;SEZ6L2;RPL6;PCSK1N;RPS16;YWHAQ;DPYSL5;DPYSL2;KIF5A;NCAM1;RPS11;AP2M1;APC2;RPS8;RPL35A;EEF2;QKI;ACLY;RPS28;TUBB2A;NACA;TTC3;RPL37A;GNAS;EVL;RPL26;ND3;RPS24;RAN
Declive (VI)	31/300	1.02086e-10	2.13291e-09	0	0	4.45269	102.435	RPL5;HSP90AB1;USP11;HMP19;RPL6;PLD3;RPS15;UCHL1;TUBA1B;RPS16;DPYSL3;IDS;KIF1A;AP2M1;FDFT1;MARCKSL1;RPS8;RPL23;RPL35A;RPS25;MYL6;RPS28;FABP5;VGF;TTC3;HNRNPD;EVL;RPS21;RPS24;PFN2;RPS23
OB granular layer	31/300	1.02086e-10	2.13291e-09	0	0	4.45269	102.435	RPL4;RPL10;STMN3;RPL6;UCHL1;PCSK1N;ALCAM;KIF5C;NEFL;RPS11;VAT1L;SKP1;RPS7;RPS8;RPS6;NMNAT2;EEF2;PGM2L1;EEF1G;RPS28;CAPRIN1;RPL37A;GNAS;RPL24;RPL26;FAU;AGRN;RPS21;RPS24;RPS23;PAFAH1B1
OB inner plexiform layer	31/300	1.02086e-10	2.13291e-09	0	0	4.45269	102.435	RPL10;STMN3;RPL6;UCHL1;PCSK1N;GNG2;KIF5C;IDS;NEFL;RPS11;RAB6B;AP2M1;VAT1L;SKP1;RPS7;RPS8;RPS6;NMNAT2;NSG1;EEF2;PGM2L1;EEF1G;TMEFF1;RPS28;RPL27A;GNAS;RPL26;AGRN;RPS24;RPS23;PAFAH1B1
layer 1 of AOV cortex	31/300	1.02086e-10	2.13291e-09	0	0	4.45269	102.435	RPL10;CD81;RPLP0;ATP2A2;RPL6;RPL7A;CHCHD2;PCSK1N;PLXNA1;SNCG;RPS27A;CTSD;VAT1L;SKP1;CLASP2;KIDINS220;RPS8;RPS6;NMNAT2;NSG1;EEF2;PRRC2A;SQLE;ACLY;TUBB2B;NACA;RPL24;RPS20;RPL26;RPS24;TPT1
periventricular stratum of r7Co	31/300	1.02086e-10	2.13291e-09	0	0	4.45269	102.435	GPM6A;PTPRS;RTN1;STMN2;DCAF7;ADD2;UCHL1;PCSK1N;TUBB3;SV2A;RPL17;YWHAG;SNRPN;CADM1;KIDINS220;USP22;SYP;NSG1;LSS;PRRC2B;PJA2;MORF4L1;GAP43;VGF;PRKAR1A;IL1RAPL1;HNRNPD;SERINC1;EVL;MAPT;DBN1
r4 alar plate	31/300	1.02086e-10	2.13291e-09	0	0	4.45269	102.435	GPM6A;TTYH3;PTPRS;MAGED1;SDC3;HNRNPU;CHD3;DCAF7;GNG2;PEA15;FLNA;RPL17;DDX17;ACTR2;SYT1;USP22;TMOD2;PRRC2B;PJA2;SFPQ;GAP43;ARPC2;VGF;RPL27A;EEF1A2;IL1RAPL1;HNRNPC;MAPT;VAMP2;DBN1;CDK5R1
r6 part of rostral ventromedial reticular area	31/300	1.02086e-10	2.13291e-09	0	0	4.45269	102.435	YWHAE;APP;GDI1;RPL10;TTYH1;RPLP0;ATN1;HMP19;CHD4;PRPF8;RPL6;RPL7;ALCAM;DNER;PSAP;NDFIP1;SYT1;HSPA5;LAPTM5;PGM2L1;PRRC2A;EEF1A1;RPS25;MYL6;TUBB2B;TTC3;GNAS;CPE;ND3;INA;PAFAH1B1
r7 part of the dorsal cochlear nucleus	31/300	1.02086e-10	2.13291e-09	0	0	4.45269	102.435	GPM6A;PTPRS;RTN1;STMN2;DCAF7;ADD2;UCHL1;PCSK1N;TUBB3;SV2A;RPL17;YWHAG;SNRPN;CADM1;KIDINS220;USP22;SYP;NSG1;LSS;PRRC2B;PJA2;MORF4L1;GAP43;VGF;PRKAR1A;IL1RAPL1;HNRNPD;SERINC1;EVL;MAPT;DBN1
Cortical amygdalar area, posterior part, lateral zone, layer 1	30/300	4.56684e-10	9.09985e-09	0	0	4.28425	92.1415	GPM6A;HSP90AB1;ATP5A1;ENO2;KLC1;ACTB;RPL7A;TUBA1B;CHCHD2;TUBA1A;DPYSL2;KIF5A;NCAM1;RPL15;CLASP2;CAP1;DYNC1H1;HSPA8;TPI1;ANXA5;RPSA;NSG1;TUBB2B;GNAS;FAU;ALDOA;SQSTM1;PFDN5;TPT1;PAFAH1B1
Declive (VI), granular layer	30/300	4.56684e-10	9.09985e-09	0	0	4.28425	92.1415	RPL5;HSP90AB1;USP11;RPL6;PLD3;RPS15;UCHL1;TUBA1B;RPS16;RPS19;PPP2R1A;DPYSL3;IDS;KIF1A;AP2M1;FDFT1;MARCKSL1;RPS8;RPL23;RPL35A;RPS25;MYL6;RPS28;FABP5;HNRNPD;EVL;RPS21;RPS24;PFN2;RPS23
Pyramus (VIII), granular layer	30/300	4.56684e-10	9.09985e-09	0	0	4.28425	92.1415	RPL6;PLD3;RPS15;UCHL1;TUBA1B;PCSK1N;RPS16;ALCAM;RPS3;RPL35;MARCKSL1;RPS8;RPL23;RPS6;RPL13A;RPL35A;EEF1G;RPS25;RPS28;FABP5;RPL27A;TTC3;HNRNPD;RPL24;RPS20;TMBIM6;EVL;RPS21;RPS24;RPS23
r5 alar plate	30/300	4.56684e-10	9.09985e-09	0	0	4.28425	92.1415	GPM6A;TTYH3;PTPRS;RTN1;MAGED1;SDC3;HNRNPU;NUCKS1;CHD3;DCAF7;PDZD4;GNG2;PEA15;RPS3;DDX17;MARCKSL1;SYT1;H2AFY;PRRC2B;PRRC2A;EEF1G;SFPQ;GAP43;PKM;EEF1A2;IL1RAPL1;MAPT;VAMP2;DBN1;CDK5R1
rhombomere 11	30/300	4.56684e-10	9.09985e-09	0	0	4.28425	92.1415	KHDRBS1;RTN1;GSTP1;ACTG1;ELAVL3;RPS14;FADS2;RPS15A;TUBB3;PEA15;PSAP;RPL35;RPL13;PIP4K2B;CKB;RPL17;PHLDA1;DDX17;HSP90AA1;SNRPN;KIDINS220;RPL13A;ILF3;HNRNPK;RAB31;PKM;NACA;CPE;HNRNPC;PFDN5
Anterior olfactory nucleus, layer 1	29/300	1.96727e-09	3.49882e-08	0	0	4.11767	82.5454	CD81;RPLP0;OAZ1;RPL6;CHCHD2;PCSK1N;SNCG;RPS27A;VAT1L;MAP4K4;CLASP2;APC2;KIDINS220;RPS8;RPS6;RPL13A;NSG1;EEF2;SQLE;ACLY;RPS28;NACA;FASN;CAPRIN1;RPL37A;RPL26;PPIA;RPS24;TPT1
Folium-tuber vermis (VII), molecular layer	29/300	1.96727e-09	3.49882e-08	0	0	4.11767	82.5454	HSP90AB1;USP11;RPL6;PLD3;RPS15;UCHL1;TUBA1B;RPS16;RPS3;RPL35;IDS;MARCKSL1;RPS8;RPL23;RPL35A;EEF1G;RPS25;RPS28;FABP5;TTC3;RPS20;TMBIM6;EVL;RPL26;AGRN;RPS21;PPIA;RPS24;RPS23
Parapyramidal nucleus	29/300	1.96727e-09	3.49882e-08	0	0	4.11767	82.5454	APP;SET;HSP90AB1;GDI1;RPL10;RPLP0;HMP19;CHD4;PRPF8;RPL6;RTN4;DNER;PSAP;HSPA8;NDFIP1;HSPA5;RPSA;PRRC2A;EEF1A1;TUBB2B;ILF3;TUBB2A;VGF;GNAS;RPL26;ND3;SMAP2;SQSTM1;PAFAH1B1
Pyramus (VIII)	29/300	1.96727e-09	3.49882e-08	0	0	4.11767	82.5454	RPL6;PLD3;RPS15;UCHL1;TUBA1B;PCSK1N;RPS16;ALCAM;RPS3;RPL35;RPS8;RPL23;RPS6;RPL13A;RPL35A;EEF1G;RPS25;RPS28;FABP5;RPL27A;TTC3;HNRNPD;RPL24;RPS20;TMBIM6;EVL;RPS21;RPS24;RPS23
layer 1 of InsCx	29/300	1.96727e-09	3.49882e-08	0	0	4.11767	82.5454	RPL4;CD81;GSTP1;RPLP0;SEZ6L2;OAZ1;CHCHD2;RPS15A;TRIM28;DPYSL5;PRDX1;DPYSL3;RPL14;FLNA;CKB;RPS2;RPS11;CTSD;RPL19;JUND;SNRPN;KIDINS220;TMOD2;EEF2;QKI;RAB31;ARPC2;FASN;RPL26
plexiform layer of TuStr	29/300	1.96727e-09	3.49882e-08	0	0	4.11767	82.5454	APP;CD63;GDI1;CD81;STMN2;OAZ1;RPS15A;YWHAQ;PRDX1;PEA15;KIF5A;RPS10;HSPA8;CADM3;RPS8;MSN;NMNAT2;EEF2;YWHAZ;QKI;SEPT2;SQLE;TUBB2B;TUBB2A;FASN;CAPRIN1;RPL37A;GNAS;TPT1
pontomedullary hindbrain	29/300	1.96727e-09	3.49882e-08	0	0	4.11767	82.5454	RTN1;SDC3;CELF3;HNRNPU;HMP19;CHD3;DCAF7;SOX2;PDZD4;PGRMC1;RIMS3;ZMIZ1;PEA15;NNAT;RPS3;DDX17;SYT1;H2AFY;PRRC2A;SFPQ;GAP43;SERBP1;CTNNB1;CPE;MAPT;PPIA;GAPDH;DBN1;CDK5R1
r5 part of posteroventral cochlear nucleus	29/300	1.96727e-09	3.49882e-08	0	0	4.11767	82.5454	NDRG4;SET;TTYH3;PTPRS;MAGED1;GSTP1;OAZ1;PLD3;PPP1CB;RPS14;LASP1;RPS16;TUBB3;SV2A;FLNA;RPL17;ATP9A;RPL19;MAP4K4;DYNC1H1;SNRPN;HN1;PJA2;EEF1A1;MORF4L1;GAP43;SERBP1;HDGF;SMAP2
r7 part of the posteroventral cochlear nucleus	29/300	1.96727e-09	3.49882e-08	0	0	4.11767	82.5454	TTYH3;PTPRS;RPL31;MAGED1;STMN2;PLD3;ADD2;TUBB3;SV2A;FLNA;RPS2;RPL17;MAP4K4;HSP90AA1;SNRPN;USP22;NSG1;PRRC2B;PJA2;MORF4L1;ILF3;GAP43;VGF;PRKAR1A;SERBP1;EEF1A2;IL1RAPL1;ALDOA;SMAP2
retrotrapezoid nucleus	29/300	1.96727e-09	3.49882e-08	0	0	4.11767	82.5454	YWHAE;APP;TTYH3;HSP90AB1;GDI1;RPL10;STMN2;HMP19;RPL7;SCRN1;SV2A;DNER;BUB3;DDX17;HSPA8;NDFIP1;SYT1;APLP2;NMNAT2;PRRC2A;EEF1A1;TUBB2B;ILF3;VGF;TTC3;SMAP2;PPIA;SQSTM1;INA
superficial stratum of r5Co	29/300	1.96727e-09	3.49882e-08	0	0	4.11767	82.5454	NDRG4;SET;TTYH3;PTPRS;MAGED1;GSTP1;OAZ1;PLD3;PPP1CB;RPS14;LASP1;RPS16;TUBB3;SV2A;FLNA;RPL17;ATP9A;RPL19;MAP4K4;DYNC1H1;SNRPN;HN1;PJA2;EEF1A1;MORF4L1;GAP43;SERBP1;HDGF;SMAP2
superficial stratum of r6BL	29/300	1.96727e-09	3.49882e-08	0	0	4.11767	82.5454	YWHAE;APP;TTYH3;HSP90AB1;GDI1;RPL10;STMN2;HMP19;RPL7;SCRN1;SV2A;DNER;BUB3;DDX17;HSPA8;NDFIP1;SYT1;APLP2;NMNAT2;PRRC2A;EEF1A1;TUBB2B;ILF3;VGF;TTC3;SMAP2;PPIA;SQSTM1;INA
superficial stratum of r7Co	29/300	1.96727e-09	3.49882e-08	0	0	4.11767	82.5454	TTYH3;PTPRS;RPL31;MAGED1;STMN2;PLD3;ADD2;TUBB3;SV2A;FLNA;RPS2;RPL17;MAP4K4;HSP90AA1;SNRPN;USP22;NSG1;PRRC2B;PJA2;MORF4L1;ILF3;GAP43;VGF;PRKAR1A;SERBP1;EEF1A2;IL1RAPL1;ALDOA;SMAP2
Flocculus, granular layer	28/300	8.15228e-09	1.28998e-07	0	0	3.95294	73.6234	RAB3C;SET;RPL10;SEZ6L2;PLD3;RPS16;DPYSL5;RPS18;DPYSL2;IDS;RPS11;APC2;RPL21;KIDINS220;RPS6;L1CAM;PJA2;MLLT11;MORF4L1;TUBB2A;RPL27A;RPL37A;FSCN1;RPS20;EVL;DBN1;RAN;RPS23
Folium-tuber vermis (VII)	28/300	8.15228e-09	1.28998e-07	0	0	3.95294	73.6234	HSP90AB1;USP11;RPL6;PLD3;RPS15;UCHL1;TUBA1B;RPS16;RPS3;RPL35;IDS;MARCKSL1;RPS8;RPL23;RPL35A;EEF1G;RPS25;RPS28;FABP5;TTC3;RPS20;TMBIM6;EVL;AGRN;RPS21;PPIA;RPS24;RPS23
Folium-tuber vermis (VII), granular layer	28/300	8.15228e-09	1.28998e-07	0	0	3.95294	73.6234	HSP90AB1;USP11;RPL6;PLD3;RPS15;UCHL1;TUBA1B;RPS16;RPS3;RPL35;IDS;MARCKSL1;RPS8;RPL23;RPL35A;EEF1G;RPS25;RPS28;FABP5;TTC3;RPS20;TMBIM6;EVL;AGRN;RPS21;PPIA;RPS24;RPS23
Frontal pole, layer 1	28/300	8.15228e-09	1.28998e-07	0	0	3.95294	73.6234	APP;RPL5;CD81;ATP5A1;STMN3;ENO2;SEZ6L2;UCHL1;TUBA1B;PPP2R1A;SKP1;RPL19;SLC38A1;RPS7;RPS8;IGFBP2;RPL13A;RPL35A;EEF2;FASN;TTC3;HNRNPD;GNAS;CALR;INA;RPS24;RAN;PAFAH1B1
Posterior parietal association areas, layer 1	28/300	8.15228e-09	1.28998e-07	0	0	3.95294	73.6234	RPL4;MAGED1;CD81;SEZ6L2;ACTB;DPYSL3;NCAM1;RPS27A;CTSD;RPL17;PHLDA1;SNRPN;RPL23;APLP1;QKI;PJA2;RPS28;TUBB2B;NACA;CSDE1;CAPRIN1;CANX;RPL24;RPL26;ALDOA;SQSTM1;EIF4G2;TPT1
Primary motor area, Layer 2/3	28/300	8.15228e-09	1.28998e-07	0	0	3.95294	73.6234	RPL4;CD63;SPARC;CD81;SEZ6L2;OAZ1;RPL6;CHCHD2;CDH2;DPYSL5;TUBB3;DPYSL3;RPL14;FLNA;RPS27A;CTSD;CLASP2;SLC38A1;HMGA1;QKI;RAB31;PRKAR1A;HNRNPH1;NACA;CANX;EEF1A2;SQSTM1;RPS24
Pyramus (VIII), molecular layer	28/300	8.15228e-09	1.28998e-07	0	0	3.95294	73.6234	RPL6;PLD3;RPS15;UCHL1;TUBA1B;PCSK1N;RPS16;RPS3;RPL35;RPS8;RPL23;RPS6;RPL13A;RPL35A;EEF1G;RPS25;RPS28;FABP5;RPL27A;TTC3;HNRNPD;RPL24;RPS20;TMBIM6;EVL;RPS21;RPS24;RPS23
mantle zone of r5Co	28/300	8.15228e-09	1.28998e-07	0	0	3.95294	73.6234	NDRG4;SET;TTYH3;PTPRS;MAGED1;STMN3;PLD3;ADD2;PPP1CB;RPS16;TUBB3;SV2A;RPL17;MAP4K4;SNRPN;KIDINS220;USP22;HN1;L1CAM;PRRC2B;PJA2;MORF4L1;GAP43;VGF;EEF1A2;EVL;RPL26;SMAP2
mantle zone of r7Co	28/300	8.15228e-09	1.28998e-07	0	0	3.95294	73.6234	PTPRS;RTN1;STMN2;DCAF7;ADD2;UCHL1;TUBB3;SV2A;RPS2;RPL17;SNRPN;CADM1;KIDINS220;USP22;SYP;NSG1;PRRC2B;PJA2;MORF4L1;ILF3;GAP43;VGF;PRKAR1A;EEF1A2;IL1RAPL1;SERINC1;EVL;MAPT
p1 part of the substantia nigra reticulata	28/300	8.15228e-09	1.28998e-07	0	0	3.95294	73.6234	RTN3;NDRG4;MAGED1;DCTN1;CLTC;ADD2;CHCHD2;SCRN1;RPL14;FLNA;RPL15;RPS2;RAB6B;MAP4K4;ACTR2;CADM3;CADM1;RPL13A;NMNAT2;NSG1;SQLE;NACA;IL1RAPL1;ALDOA;SMAP2;PPIA;DBN1;TPT1
periventricular stratum of r5Co	28/300	8.15228e-09	1.28998e-07	0	0	3.95294	73.6234	NDRG4;SET;TTYH3;PTPRS;STMN3;CHD3;ADD2;PPP1CB;PCSK1N;TUBB3;TRIM2;KIF1A;RPL17;RAB6B;SNRPN;KIDINS220;USP22;MYO5A;HN1;L1CAM;PRRC2B;PJA2;MORF4L1;VGF;PRKAR1A;EEF1A2;EVL;RPL26
plexiform layer of TuPal	28/300	8.15228e-09	1.28998e-07	0	0	3.95294	73.6234	RPL4;APP;GPM6A;GDI1;CD81;STMN2;DBI;KLC1;TUBA1A;YWHAQ;PPP2R1A;KIF5C;DNER;KIF5A;RPL15;HSPA8;CADM3;SNRPN;USP22;APLP1;NMNAT2;EEF2;SQLE;TUBB2B;RAB31;FASN;GNAS;PFN2
r5 part of dorsal cochlear nucleus	28/300	8.15228e-09	1.28998e-07	0	0	3.95294	73.6234	NDRG4;SET;TTYH3;PTPRS;STMN3;CHD3;ADD2;PPP1CB;PCSK1N;TUBB3;TRIM2;KIF1A;RPL17;RAB6B;SNRPN;KIDINS220;USP22;MYO5A;HN1;L1CAM;PRRC2B;PJA2;MORF4L1;VGF;PRKAR1A;EEF1A2;EVL;RPL26
r5 part of the cochlear column	28/300	8.15228e-09	1.28998e-07	0	0	3.95294	73.6234	NDRG4;SET;TTYH3;PTPRS;MAGED1;STMN3;PLD3;ADD2;PPP1CB;RPS16;TUBB3;SV2A;RPL17;MAP4K4;SNRPN;KIDINS220;USP22;HN1;L1CAM;PRRC2B;PJA2;MORF4L1;GAP43;VGF;EEF1A2;EVL;RPL26;SMAP2
r7 part of cochlear column	28/300	8.15228e-09	1.28998e-07	0	0	3.95294	73.6234	PTPRS;RTN1;STMN2;DCAF7;ADD2;UCHL1;TUBB3;SV2A;RPS2;RPL17;SNRPN;CADM1;KIDINS220;USP22;SYP;NSG1;PRRC2B;PJA2;MORF4L1;ILF3;GAP43;VGF;PRKAR1A;EEF1A2;IL1RAPL1;SERINC1;EVL;MAPT
Anterior olfactory nucleus, external part	27/300	3.24637e-08	4.85151e-07	0	0	3.79002	65.3519	RPL4;PTPRS;RPLP0;RPL6;CHCHD2;RPS16;SNCG;CKB;RPS27A;PHLDA1;SKP1;KIDINS220;RPS8;RPS6;NMNAT2;NSG1;EEF2;RPS28;NACA;RPL37A;RPL24;RPL26;AGRN;RPS24;RAN;TPT1;RPS23
Frontal pole, cerebral cortex	27/300	3.24637e-08	4.85151e-07	0	0	3.79002	65.3519	APP;RPL5;CD81;ATP5A1;STMN3;ENO2;SEZ6L2;UCHL1;PPP2R1A;SKP1;SLC38A1;RPS7;RPS8;IGFBP2;RPL13A;RPL35A;EEF2;FASN;TTC3;HNRNPD;GNAS;CALR;INA;RPS24;RAN;PFN2;PAFAH1B1
Main olfactory bulb, granule layer	27/300	3.24637e-08	4.85151e-07	0	0	3.79002	65.3519	RPL4;RPL10;STMN3;RPL6;UCHL1;PCSK1N;KIF5C;NEFL;VAT1L;SKP1;RPS8;RPS6;NMNAT2;EEF2;PGM2L1;EEF1G;TMEFF1;RPS28;CAPRIN1;GNAS;RPL24;RPL26;FAU;AGRN;RPS24;RPS23;PAFAH1B1
Nodulus (X), granular layer	27/300	3.24637e-08	4.85151e-07	0	0	3.79002	65.3519	RPL5;RPL11;STMN3;ADD2;RPS15;TUBA1B;PCSK1N;PPP2R1A;TRIM2;SKP1;MARCKSL1;RPL23;RPL13A;MLLT11;EEF1G;TMEFF1;TUBB2A;FABP5;VGF;NACA;GNB1;HNRNPD;EVL;MAPT;DBN1;PFN2;RPS23
Primary somatosensory area, lower limb, layer 2/3	27/300	3.24637e-08	4.85151e-07	0	0	3.79002	65.3519	RPL4;RPL30;MAGED1;CD81;ACTB;ELAVL3;TUBA1A;CDH2;TUBB3;DPYSL3;NCAM1;RPS27A;CTSD;RPL17;APC2;SLC38A1;RPL23;APLP1;QKI;PRKAR1A;HNRNPH1;NACA;CANX;SERINC1;FAU;EIF4G2;TPT1
intermediate stratum of CbH	27/300	3.24637e-08	4.85151e-07	0	0	3.79002	65.3519	RPL5;GPM6A;RPL30;SET;USP11;DCAF7;PLD3;RPS14;PGRMC1;GNG2;RPL14;MARCKSL1;JUND;CADM1;L1CAM;PRRC2B;SREBF2;RPS25;GAP43;VGF;NACA;RPL27A;IL1RAPL1;HNRNPD;RPS21;PFDN5;RPS23
r2 alar plate	27/300	3.24637e-08	4.85151e-07	0	0	3.79002	65.3519	GPM6A;RPL30;TTYH3;USP11;HMP19;CHD3;DCAF7;PGRMC1;FLNA;RPS27A;RPL17;ACTR2;SYT1;USP22;PRRC2B;PJA2;SFPQ;GAP43;VGF;RPL27A;CPE;FXYD6;MAPT;GAPDH;VAMP2;DBN1;RAN
r3 alar plate	27/300	3.24637e-08	4.85151e-07	0	0	3.79002	65.3519	GPM6A;RPL30;TTYH3;PTPRS;MAGED1;USP11;SDC3;HMP19;CHD3;DCAF7;PGRMC1;GNG2;RPL17;ACTR2;SYT1;USP22;PRRC2B;PJA2;SFPQ;GAP43;VGF;IL1RAPL1;CPE;MAPT;VAMP2;DBN1;CDK5R1
Cochlear nuclei	26/300	1.24087e-07	1.6901e-06	0	0	3.6289	57.7078	GPM6A;SET;TTYH3;PTPRS;USP11;DCAF7;PLD3;PPP1CB;GNG2;DPYSL5;IDS;RPL17;ACTR2;KIDINS220;HN1;L1CAM;PRRC2B;SREBF2;PJA2;GAP43;VGF;IL1RAPL1;FSCN1;FXYD6;MAPT;PAFAH1B1
Cochlear nucleus, subpedunclular granular region	26/300	1.24087e-07	1.6901e-06	0	0	3.6289	57.7078	RPL5;GPM6A;RPL10;PPM1N;PGRMC1;ALCAM;PPP2R1A;DPYSL5;RPS11;JUND;RPL21;KIDINS220;RPL35A;SOX11;HN1;L1CAM;PRRC2B;SREBF2;PJA2;VGF;RPL27A;PKIA;FSCN1;FXYD6;EVL;DBN1
Medulla	26/300	1.24087e-07	1.6901e-06	0	0	3.6289	57.7078	RTN1;SDC3;RPL11;HNRNPU;NUCKS1;CHD3;ACTG1;RPS15;PDZD4;RIMS3;PEA15;PSAP;NNAT;RPS3;DDX17;SYT1;H2AFY;NR2F1;PRRC2A;EEF1G;GAP43;PKM;HNRNPD;CTNNB1;MATR3;TMBIM6
Primary somatosensory area, mouth, layer 2/3	26/300	1.24087e-07	1.6901e-06	0	0	3.6289	57.7078	RPL4;CDKN1A;CD81;RPL12;GSTP1;ZC3H8;RPL6;CHCHD2;RPS15A;PPP2R1A;DPYSL5;DPYSL3;NCAM1;RPS11;VAT1L;RPL19;SYT4;JUND;HMGA1;QKI;SQLE;FABP5;CPE;HDGF;ND3;RPS24
Primary visual area, layer 1	26/300	1.24087e-07	1.6901e-06	0	0	3.6289	57.7078	RPL4;ATP5A1;ATP2A2;DBI;SEZ6L2;KLC1;PPP2R1A;DPYSL3;NCAM1;PHLDA1;SLC38A1;SNRPN;KIDINS220;RPL23;RPSA;EEF2;QKI;MYL6;SFPQ;NACA;CAPRIN1;CANX;RPL24;HDGF;FAU;ND3
layer 1 of OCx	26/300	1.24087e-07	1.6901e-06	0	0	3.6289	57.7078	RPL4;CD81;COX4I1;ZBTB20;ATP2A2;SEZ6L2;RPL18A;PPP2R1A;NCAM1;CTSD;SLC38A1;KIDINS220;RPS6;NSG1;EEF2;QKI;SEPT3;RPS28;TUBB2A;NACA;CAPRIN1;RPL24;ND3;EIF4G2;RAN;PAFAH1B1
mantle zone of r3Co	26/300	1.24087e-07	1.6901e-06	0	0	3.6289	57.7078	GPM6A;SET;TTYH3;DCAF7;PLD3;PPP1CB;PPP2R1A;DPYSL5;IDS;NCAM1;RPS11;JUND;RPL21;KIDINS220;HN1;L1CAM;PRRC2B;PJA2;GAP43;VGF;PKIA;RPL37A;FSCN1;FXYD6;MAPT;PAFAH1B1
parvocellular part of the r9LRt	26/300	1.24087e-07	1.6901e-06	0	0	3.6289	57.7078	IL1RN;LRP1;RPL31;STMN2;CHD3;MLLT3;ACTB;RTN4;RPL7;DNER;HAS2;RPL17;SKP1;NDFIP1;KIDINS220;APLP2;EEF1A1;RPS25;ILF3;VGF;HNRNPH1;CANX;CALR;SMAP2;INA;PAFAH1B1
r11 alar plate	26/300	1.24087e-07	1.6901e-06	0	0	3.6289	57.7078	APP;KHDRBS1;RTN1;RPL31;GSTP1;RPL11;RPS14;RPS15A;PEA15;RPL13;SNCG;PIP4K2B;CKB;RPS11;PHLDA1;YWHAG;RPL19;HSP90AA1;SNRPN;RPL13A;ILF3;HNRNPK;RAB31;PKM;PFDN5;GAPDH
r7 part of parapyramidal nucleus	26/300	1.24087e-07	1.6901e-06	0	0	3.6289	57.7078	YWHAE;SET;GDI1;RPLP0;HNRNPU;HMP19;CHD4;KLC1;RPL7;TUBA1A;ZMIZ1;DNER;PSAP;NDFIP1;TSC22D1;SYT1;HSPA5;PGM2L1;MYL6;TUBB2B;TTC3;HNRNPD;GNAS;RAN;PFN2;PAFAH1B1
rhombomere 4	26/300	1.24087e-07	1.6901e-06	0	0	3.6289	57.7078	GPM6A;RAB3C;SET;TTYH3;RTN1;MAGED1;CELF3;DCAF7;SOX2;PGRMC1;RIMS3;GNG2;PEA15;RPL17;DDX17;JUND;SYT1;PRRC2B;SFPQ;GAP43;SERBP1;IL1RAPL1;CTNNB1;FXYD6;DBN1;CDK5R1
rhombomere 6	26/300	1.24087e-07	1.6901e-06	0	0	3.6289	57.7078	RTN1;SDC3;CELF3;HNRNPU;HMP19;NUCKS1;CHD3;SOX2;PDZD4;RIMS3;ZMIZ1;NNAT;RPS3;DDX17;JUND;SYT1;H2AFY;PRRC2A;EEF1G;SFPQ;GAP43;CTNNB1;MATR3;GAPDH;DBN1;CDK5R1
superficial stratum of r7BM	26/300	1.24087e-07	1.6901e-06	0	0	3.6289	57.7078	YWHAE;SET;GDI1;RPLP0;HNRNPU;HMP19;CHD4;KLC1;RPL7;TUBA1A;ZMIZ1;DNER;PSAP;NDFIP1;TSC22D1;SYT1;HSPA5;PGM2L1;MYL6;TUBB2B;TTC3;HNRNPD;GNAS;RAN;PFN2;PAFAH1B1
ventral pallium	26/300	1.24087e-07	1.6901e-06	0	0	3.6289	57.7078	RPL10;CD81;SEZ6L2;RPL6;UCHL1;PCSK1N;DPYSL2;KIF5A;NEFL;SNCG;RPS11;VAT1L;CLASP2;APC2;RPS8;NDUFA4;ANXA5;RPS6;NSG1;EEF2;RPL24;RPL26;FAU;AGRN;RPS24;PAFAH1B1
Cerebellar nuclei	25/300	4.54718e-07	5.52855e-06	0	0	3.46955	50.6678	RPL5;USP11;RPL11;DCAF7;RPL6;PLD3;PGRMC1;GNG2;MARCKSL1;CADM1;TSC22D1;RPS7;L1CAM;PRRC2B;RPS25;GAP43;VGF;NACA;RPL27A;IL1RAPL1;HNRNPD;TMBIM6;RPS21;PFDN5;RPS23
Lingula (I), molecular layer	25/300	4.54718e-07	5.52855e-06	0	0	3.46955	50.6678	RTN1;STMN3;RTN4;ADD2;PCSK1N;ATCAY;TRIM2;KIF5A;KIF1A;PHLDA1;RAB6B;RPL21;TMOD2;SYP;NSG1;MLLT11;TMEFF1;TUBB2A;VGF;TTC3;EEF1A2;EVL;MAPT;DBN1;PFN2
Nodulus (X)	25/300	4.54718e-07	5.52855e-06	0	0	3.46955	50.6678	RPL11;STMN3;ACTG1;ADD2;RPS15;TUBA1B;PCSK1N;TRIM2;MARCKSL1;NONO;RPL13A;MLLT11;EEF1G;TMEFF1;TUBB2A;PKM;FABP5;NACA;GNB1;HNRNPD;EVL;MAPT;DBN1;PFN2;RPS23
Olfactory areas	25/300	4.54718e-07	5.52855e-06	0	0	3.46955	50.6678	RPL10;CD81;RGS16;SEZ6L2;RPL6;UCHL1;PCSK1N;YWHAQ;KIF5A;NEFL;SNCG;RPS11;VAT1L;SKP1;CLASP2;JUND;RPS8;ANXA5;RPS6;NSG1;EEF2;RPL24;RPL26;RPS24;PAFAH1B1
Olfactory tubercle, molecular layer	25/300	4.54718e-07	5.52855e-06	0	0	3.46955	50.6678	APP;GDI1;CD81;STMN2;YWHAQ;KIF5C;PRDX1;KIF5A;CTSD;HSPA8;CADM3;RPS8;USP22;NMNAT2;L1CAM;EEF2;PGM2L1;SQLE;TUBB2B;TUBB2A;RAB31;FASN;GNAS;RPL26;TPT1
Primary somatosensory area, unassigned, layer 1	25/300	4.54718e-07	5.52855e-06	0	0	3.46955	50.6678	RPL4;CD81;DCTN1;GSTP1;ATP2A2;CHD4;OAZ1;RPL6;RTN4;RPL7A;CHCHD2;RPS15A;RPS2;RPS11;CTSD;PHLDA1;VAT1L;RPL19;SNRPN;PJA2;EEF1A1;NACA;CPE;HDGF;RPS24
Retrosplenial area, lateral agranular part, layer 1	25/300	4.54718e-07	5.52855e-06	0	0	3.46955	50.6678	RPL4;RTN1;CD81;MRFAP1;ATP2A2;COX6A1;SEZ6L2;OAZ1;ACTB;UCHL1;CTSD;PHLDA1;APLP2;RPS6;EEF2;LSS;QKI;SEPT3;RPS28;TUBB2B;RAB31;ID4;RPL24;SQSTM1;RAN
Secondary motor area, layer 2/3	25/300	4.54718e-07	5.52855e-06	0	0	3.46955	50.6678	SPARC;MAGED1;CD81;ATP5A1;ZBTB20;DBI;ENO2;SEZ6L2;RPL14;CTSD;AP2M1;SLC38A1;RPS7;APLP1;RPL35A;QKI;RAB31;NACA;FASN;CANX;EEF1A2;GNAS;CALR;RPS24;TPT1
lateral (dentate) cerebellar nucleus	25/300	4.54718e-07	5.52855e-06	0	0	3.46955	50.6678	SET;USP11;DCAF7;PLD3;RPS14;UCHL1;GNG2;ENC1;RPS11;MARCKSL1;TSC22D1;KIDINS220;HN1;L1CAM;PRRC2B;SREBF2;EEF1A1;RPS25;VGF;NACA;RPL27A;IL1RAPL1;HNRNPD;RPS21;RPS23
layer 1 of LOT	25/300	4.54718e-07	5.52855e-06	0	0	3.46955	50.6678	GPM6A;COX4I1;ATP5A1;MRFAP1;ATP2A2;ENO2;KLC1;ACTG1;CHCHD2;TUBA1A;KIF5A;NEFL;RPL15;HSPA8;TPI1;NDUFA4;APLP1;MYL6;TUBB2B;TUBB2A;RPS20;ALDOA;PFDN5;PFN2;PAFAH1B1
periventricular stratum of r4Co	25/300	4.54718e-07	5.52855e-06	0	0	3.46955	50.6678	GPM6A;SET;TTYH3;PTPRS;MAGED1;DCAF7;PLD3;PPP1CB;DPYSL5;DPYSL2;RPS11;RPL17;KIDINS220;RPS8;HN1;L1CAM;PRRC2B;PJA2;GAP43;VGF;PKIA;RPL37A;EVL;RPS23;PAFAH1B1
r3 part of cochlear sensory column	25/300	4.54718e-07	5.52855e-06	0	0	3.46955	50.6678	GPM6A;SET;TTYH3;DCAF7;PLD3;PPP1CB;PPP2R1A;DPYSL5;IDS;NCAM1;RPS11;RPL21;KIDINS220;HN1;L1CAM;PRRC2B;PJA2;GAP43;VGF;PKIA;RPL37A;FSCN1;FXYD6;MAPT;PAFAH1B1
r4 part of dorsal cochlear nucleus	25/300	4.54718e-07	5.52855e-06	0	0	3.46955	50.6678	GPM6A;SET;TTYH3;PTPRS;MAGED1;DCAF7;PLD3;PPP1CB;DPYSL5;DPYSL2;RPS11;RPL17;KIDINS220;RPS8;HN1;L1CAM;PRRC2B;PJA2;GAP43;VGF;PKIA;RPL37A;EVL;RPS23;PAFAH1B1
r6 part of spinal vestibular nucleus	25/300	4.54718e-07	5.52855e-06	0	0	3.46955	50.6678	RAB3C;RTN1;GSTP1;HNRNPU;NUCKS1;CHD3;DCAF7;SOX2;PDZD4;ENC1;RPS3;PIP4K2B;H2AFY;TMOD2;NR2F1;PRRC2B;SFPQ;GAP43;PKM;ARPC2;IL1RAPL1;HNRNPD;TMBIM6;RPS21;DBN1
r7 part of rostral ventromedial reticular area	25/300	4.54718e-07	5.52855e-06	0	0	3.46955	50.6678	YWHAE;APP;SET;GDI1;RPLP0;HMP19;CHD4;RPL6;RTN4;RPL7;DNER;PSAP;NDFIP1;HSPA5;PGM2L1;PRRC2A;EEF1A1;RPS25;MYL6;TUBB2B;VGF;GNAS;SQSTM1;INA;PAFAH1B1
rhombomere 5	25/300	4.54718e-07	5.52855e-06	0	0	3.46955	50.6678	GPM6A;TTYH3;RTN1;SDC3;CELF3;HNRNPU;CHD3;DCAF7;SOX2;PGRMC1;PEA15;NNAT;RPL17;DDX17;SYT1;PRRC2A;SFPQ;GAP43;SERBP1;CPE;MAPT;PPIA;GAPDH;DBN1;CDK5R1
rhombomere 7	25/300	4.54718e-07	5.52855e-06	0	0	3.46955	50.6678	RTN1;SDC3;RPL11;CELF3;HNRNPU;NUCKS1;CHD3;RPS15;SOX2;PDZD4;PSAP;NNAT;RPS3;SYT1;H2AFY;NONO;CIRBP;NR2F1;PRRC2A;EEF1G;PKM;CTNNB1;MATR3;TMBIM6;CDK5R1
rostral ventrolateral reticular area	25/300	4.54718e-07	5.52855e-06	0	0	3.46955	50.6678	YWHAE;APP;TTYH3;GDI1;RPL10;RPL31;DCTN1;RPLP0;ENO2;ACTB;RTN4;RPL7;DNER;PSAP;BUB3;YWHAG;NDFIP1;APLP2;PRRC2A;EEF1A1;ILF3;HNRNPK;SMAP2;INA;RAN
superficial stratum of r7BL	25/300	4.54718e-07	5.52855e-06	0	0	3.46955	50.6678	YWHAE;APP;TTYH3;GDI1;RPL10;RPL31;DCTN1;RPLP0;ENO2;ACTB;RTN4;RPL7;DNER;PSAP;BUB3;YWHAG;NDFIP1;APLP2;PRRC2A;EEF1A1;ILF3;HNRNPK;SMAP2;INA;RAN
[truncated: 1,975 more rows]

## Sheet: Disease Perturbations from GEO down
Term	Overlap	P-value	Adjusted P-value	Old P-value	Old Adjusted P-value	Odds Ratio	Combined Score	Genes
[truncated: 837 more rows]

[truncated: 5 more sheets: Disease Perturbations from GEO up, DAVID, GAD_DISEASE   , DAVID, GAD_DISEASE_CLASS  , DrugMatrix, g profiler]
